# Supplementary material for: Thermal exposure of adult Chinook salmon and steelhead: Diverse behavioral strategies in a large and warming river system
Source: PubMed Central journal article supplement (PMC6150539; doi:10.1371/journal.pone.0204274), 2018-09-21

# Fall Chinook 2577E

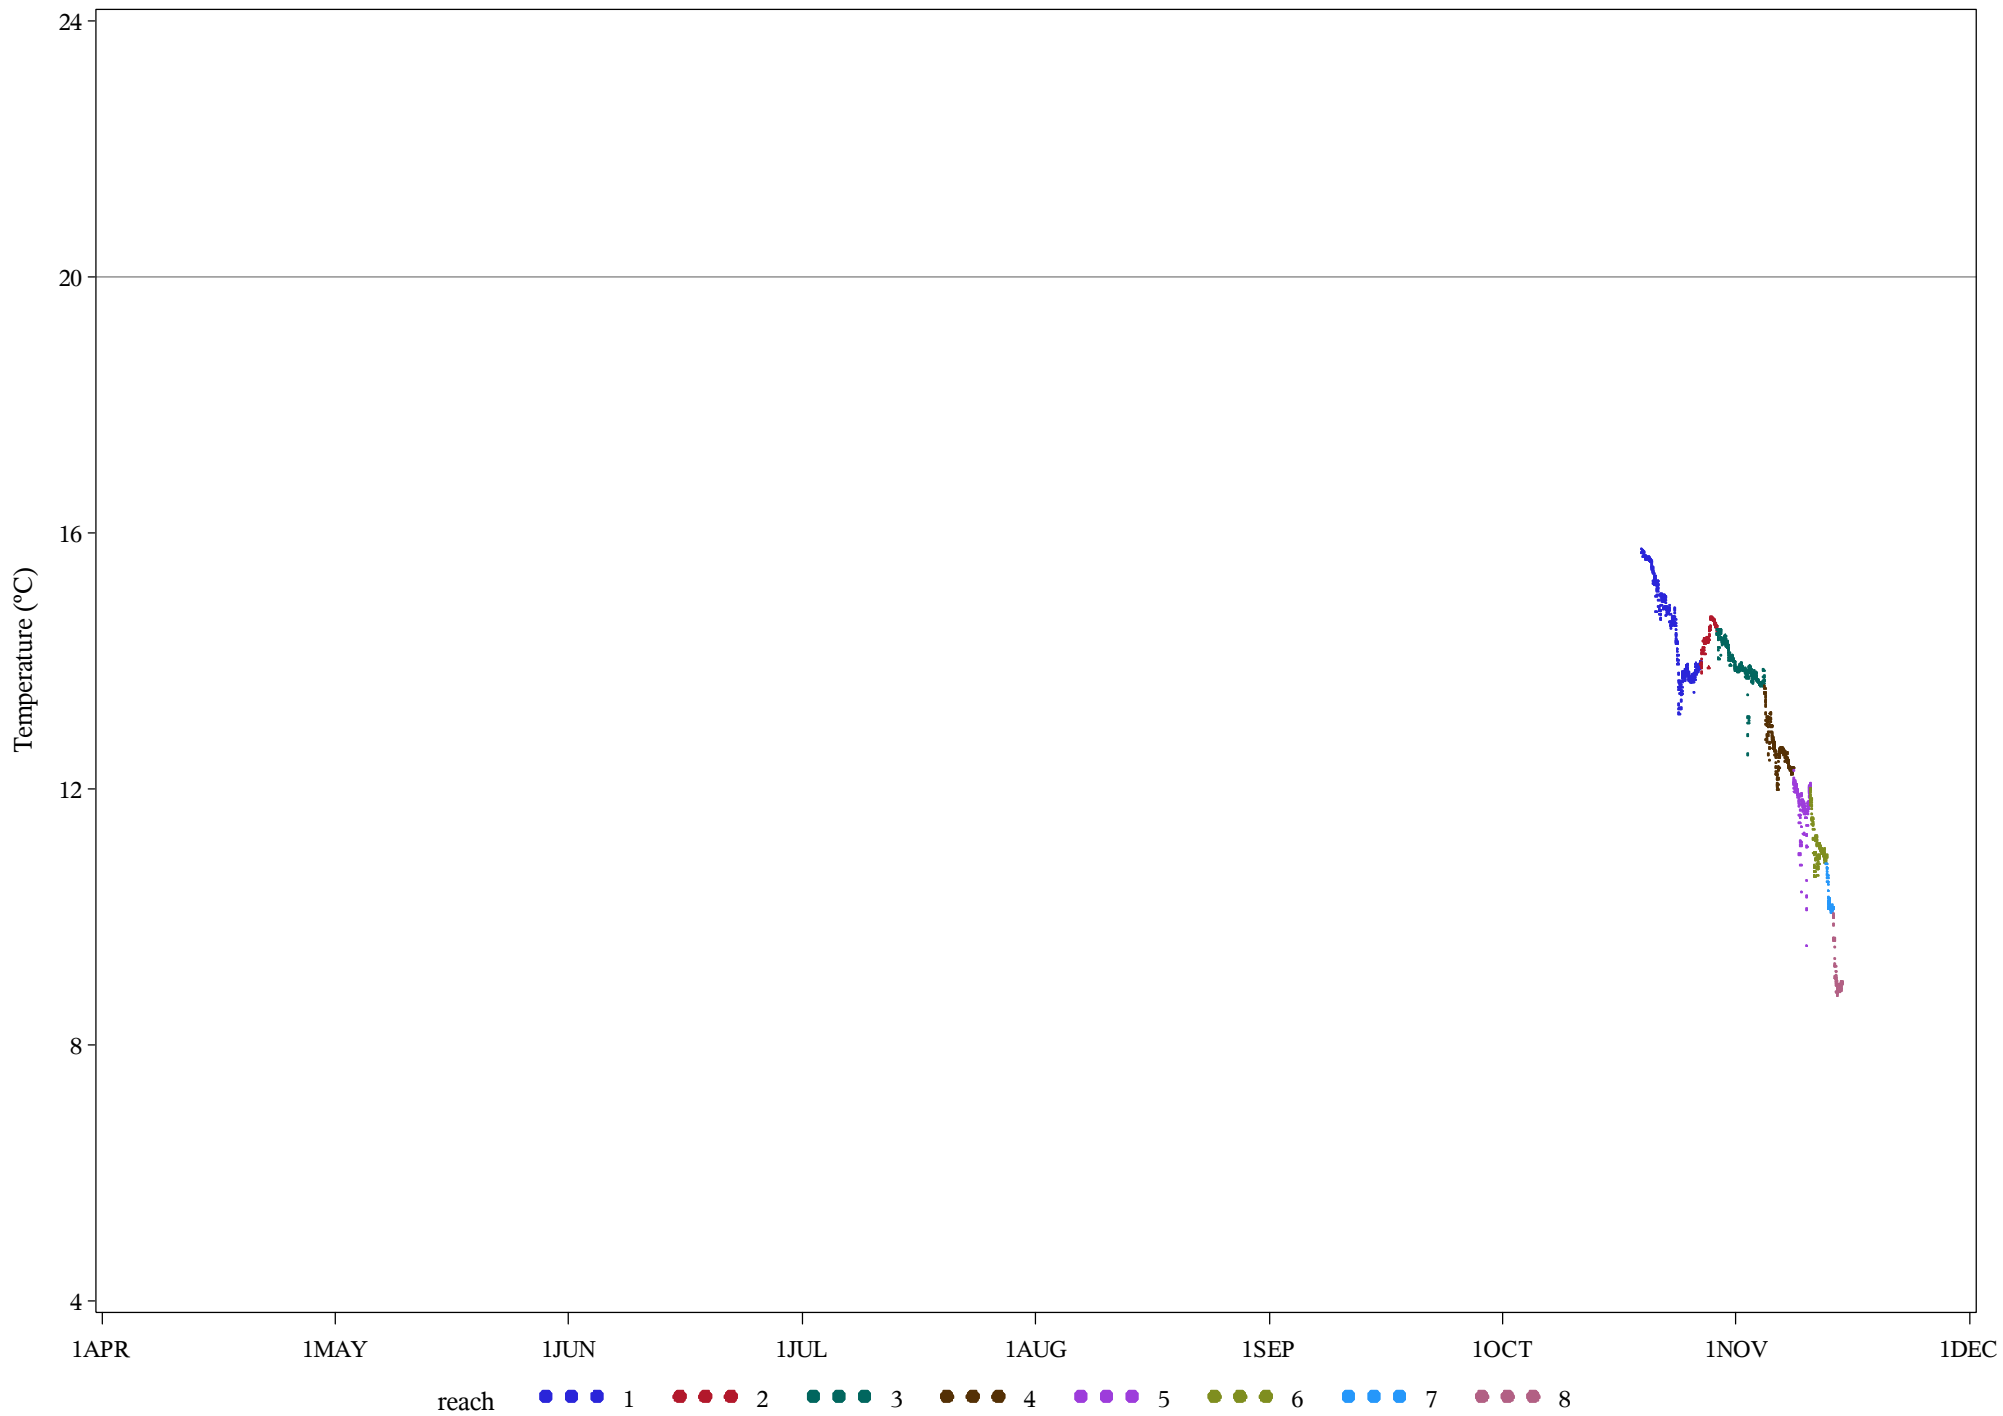



# Fall Chinook 2640B

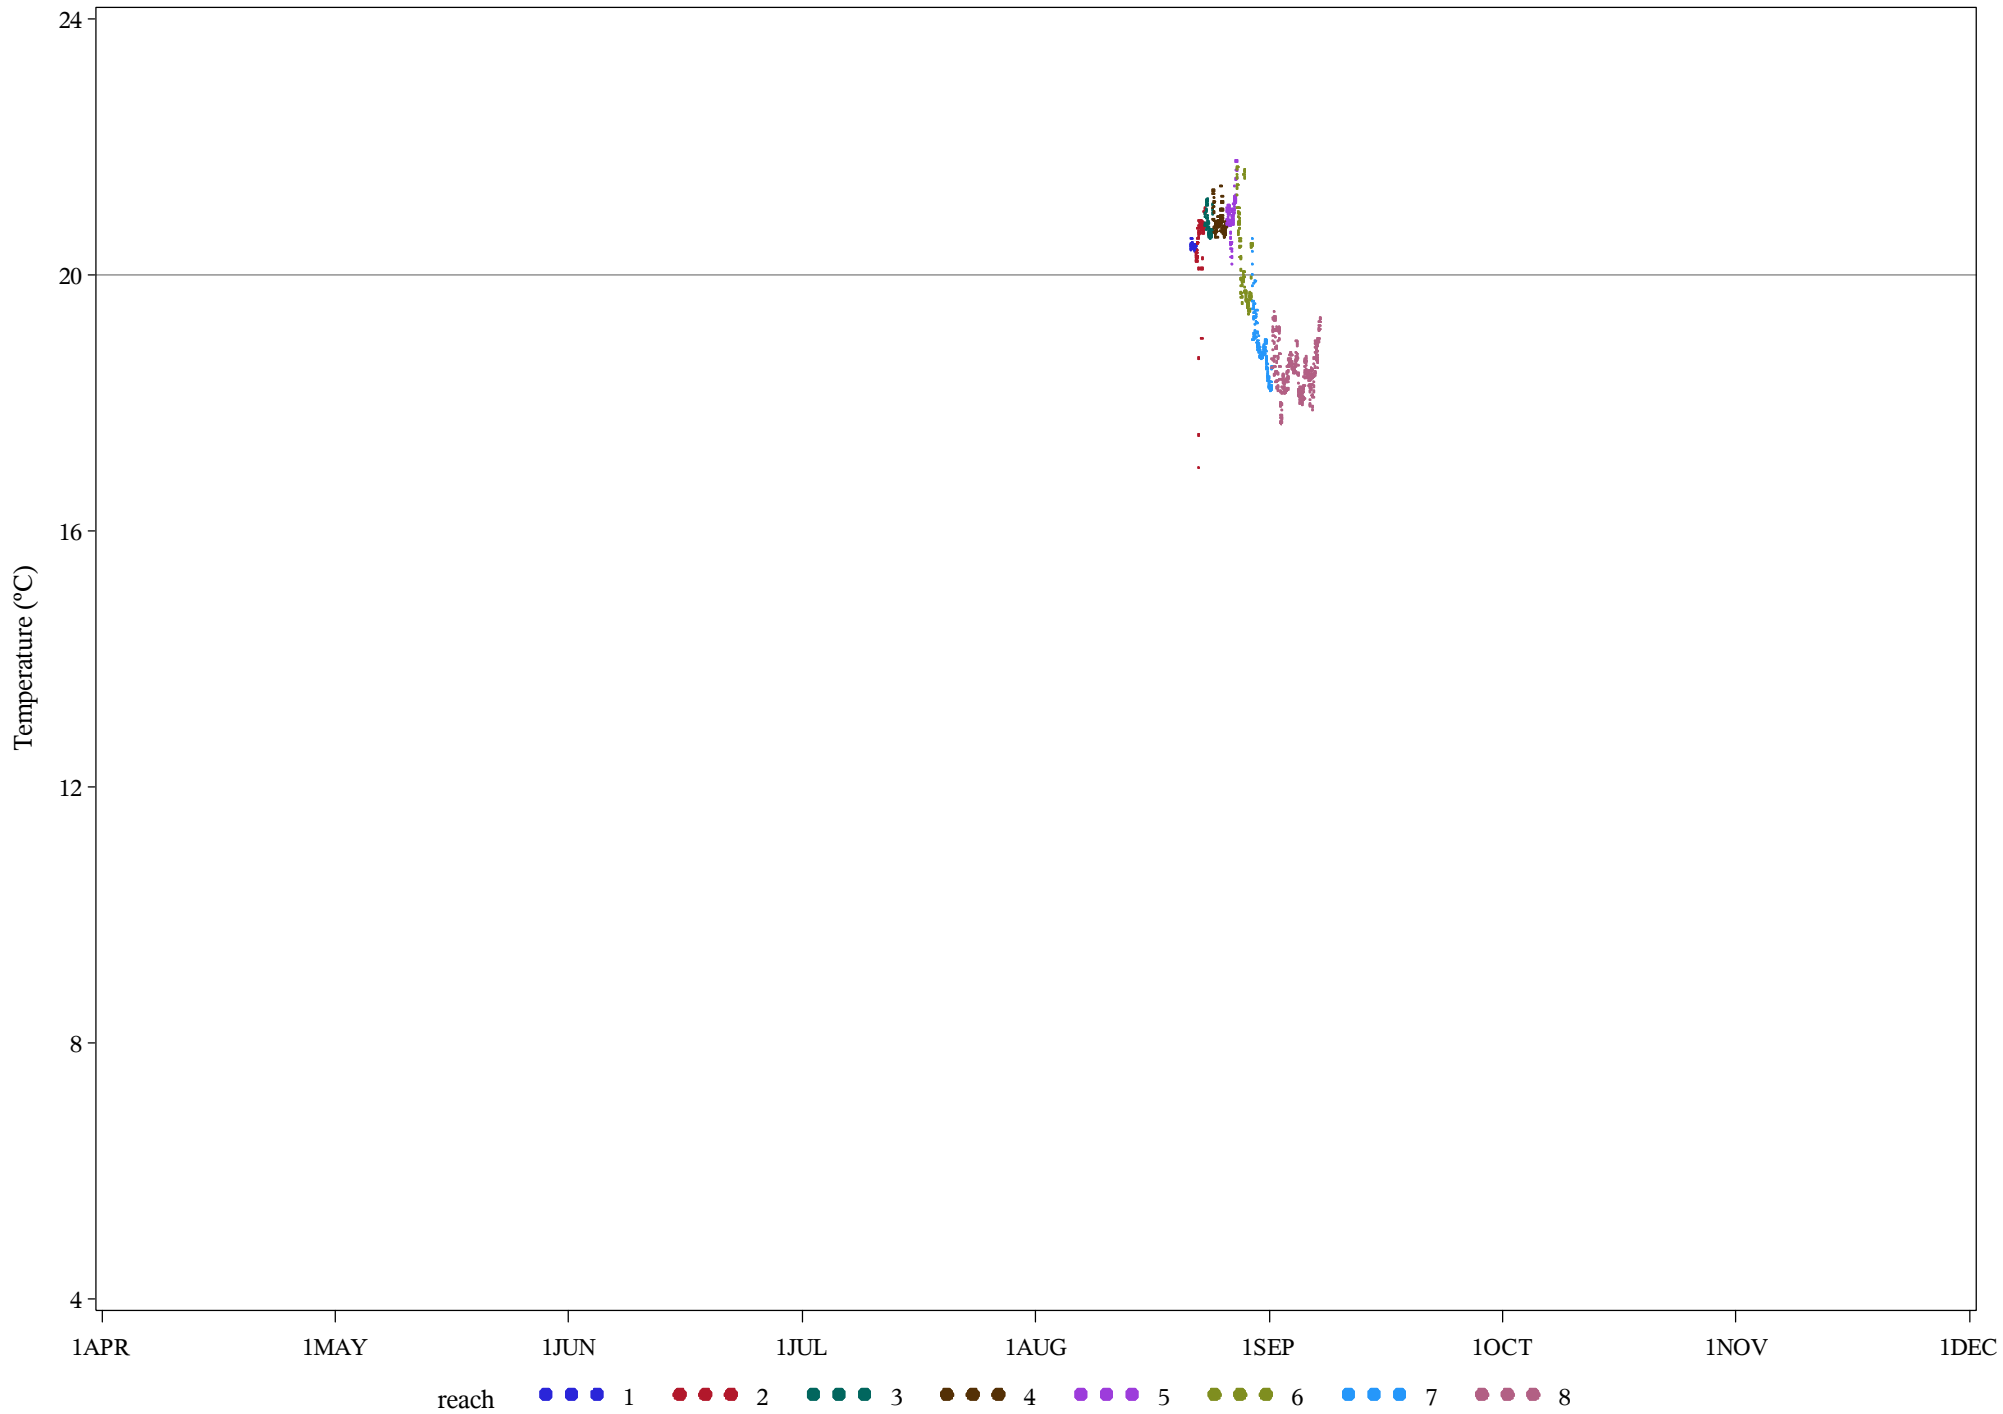

# Fall Chinook 2676B

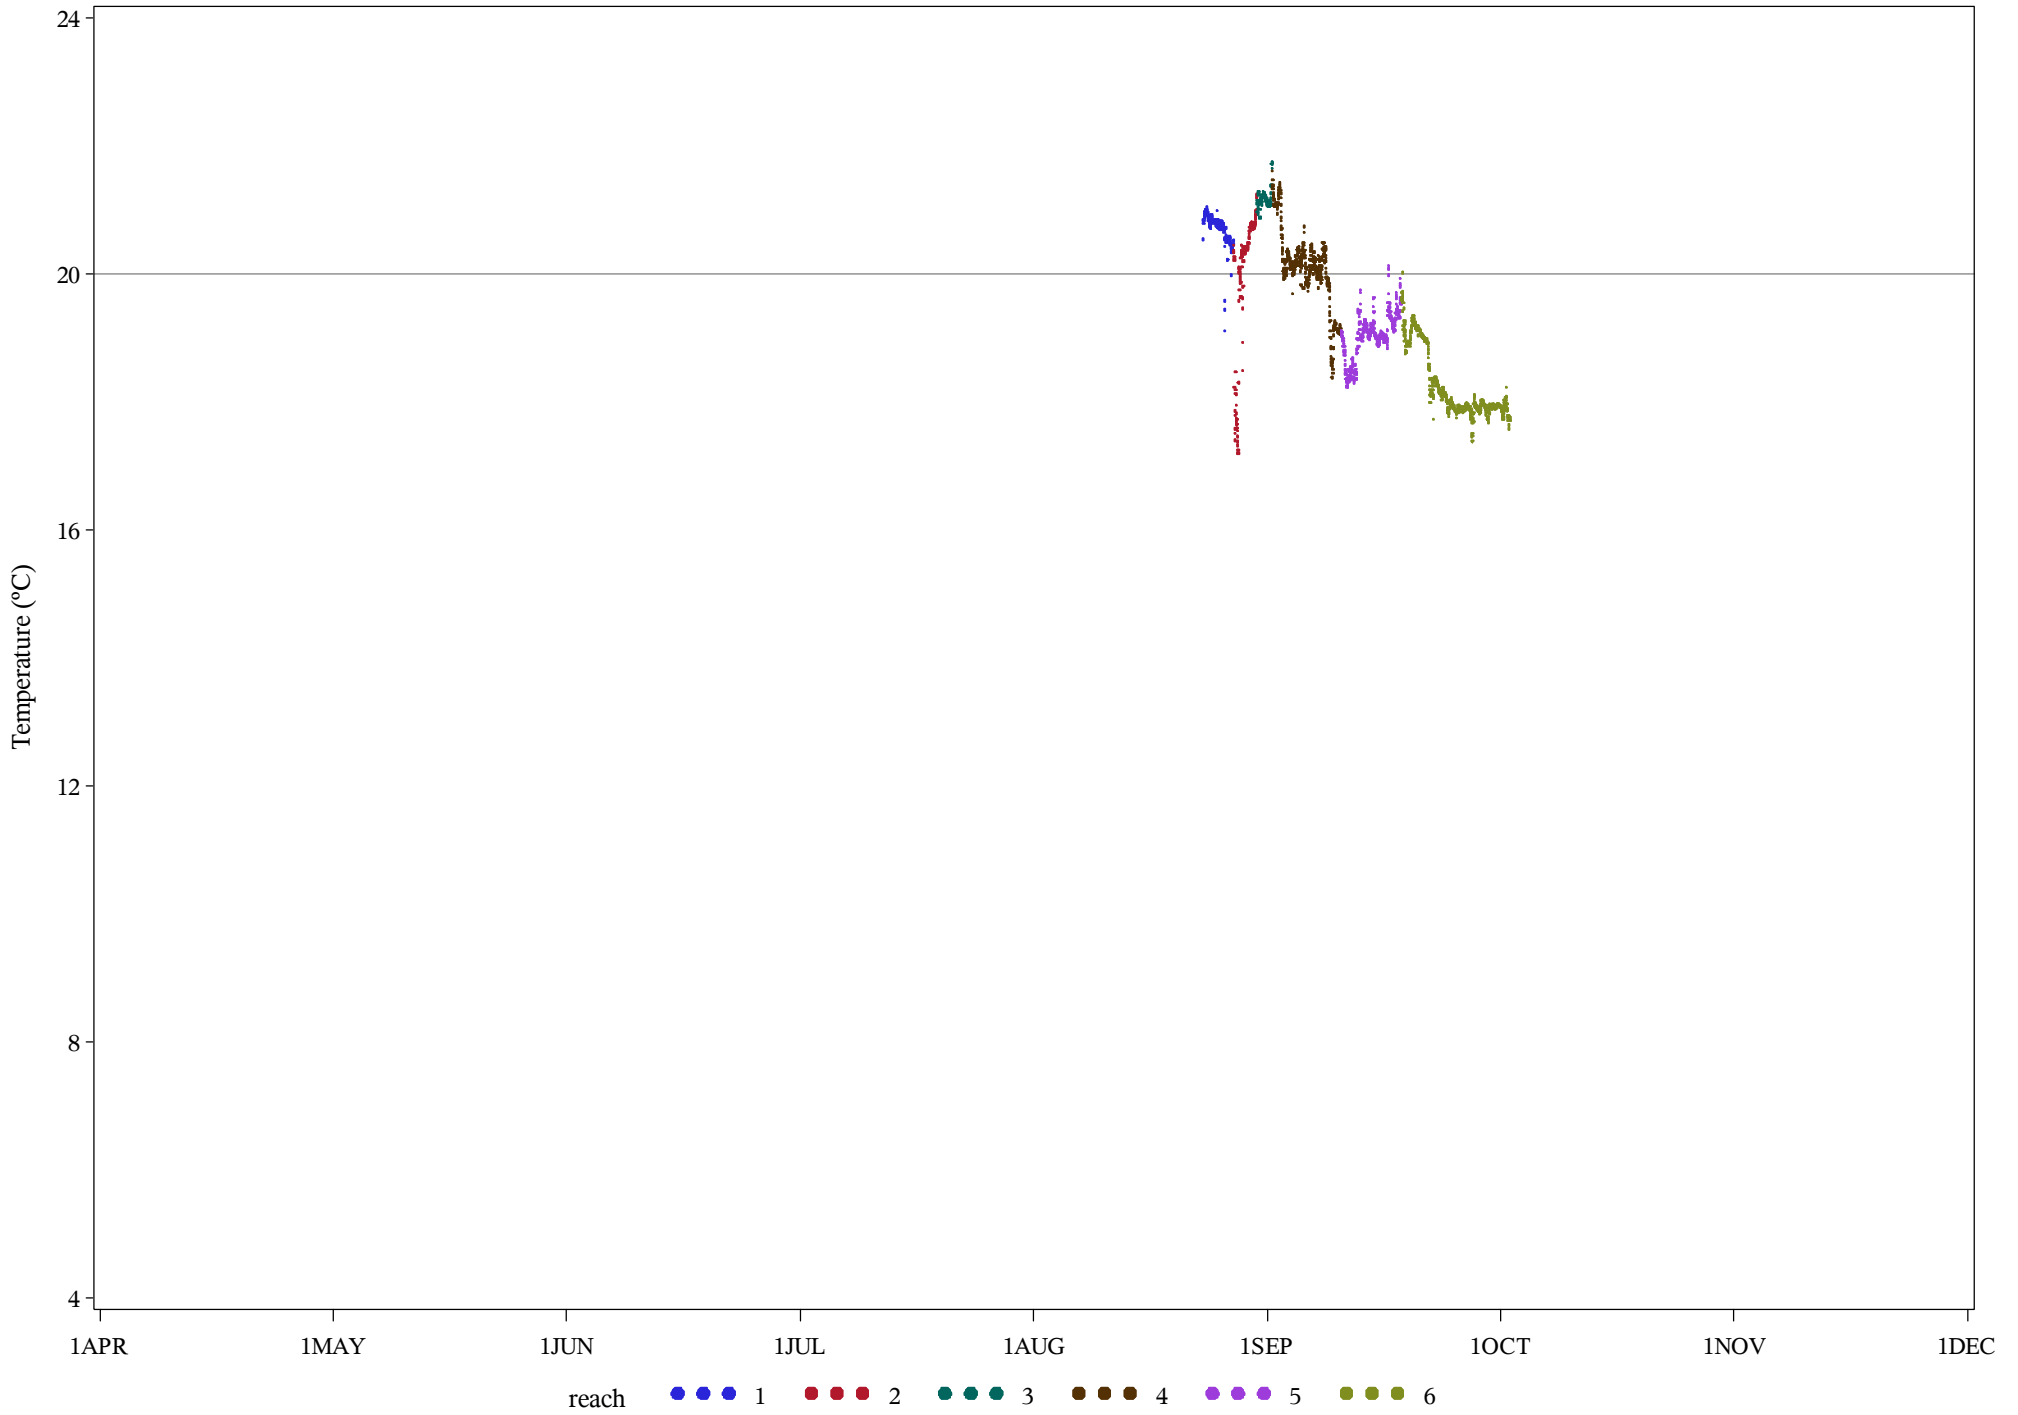

# Fall Chinook 2725A

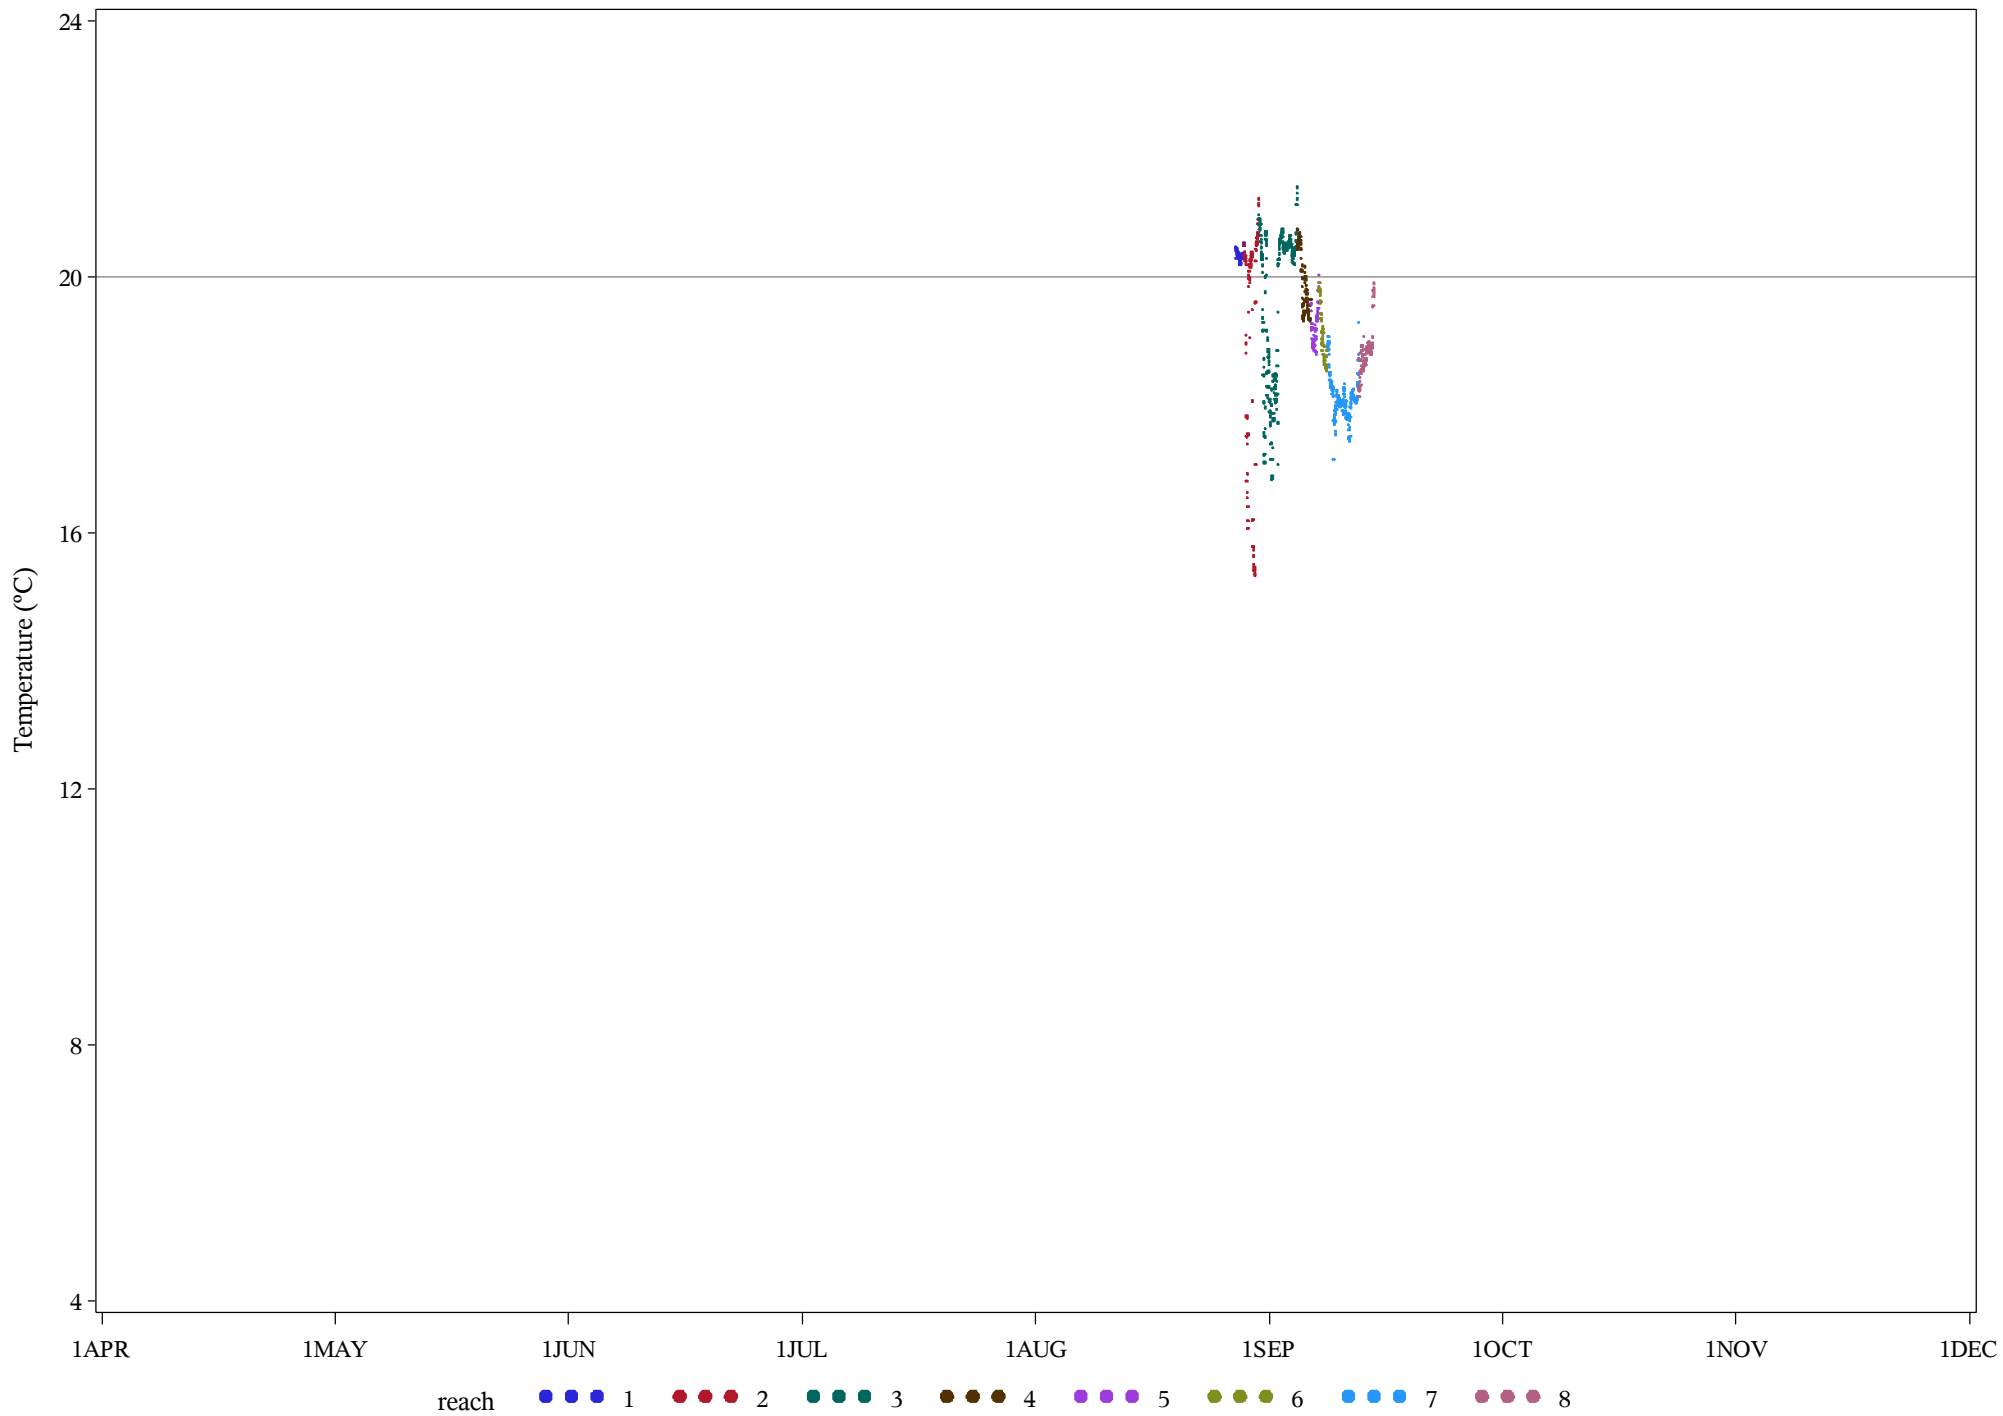



# Fall Chinook 3002B

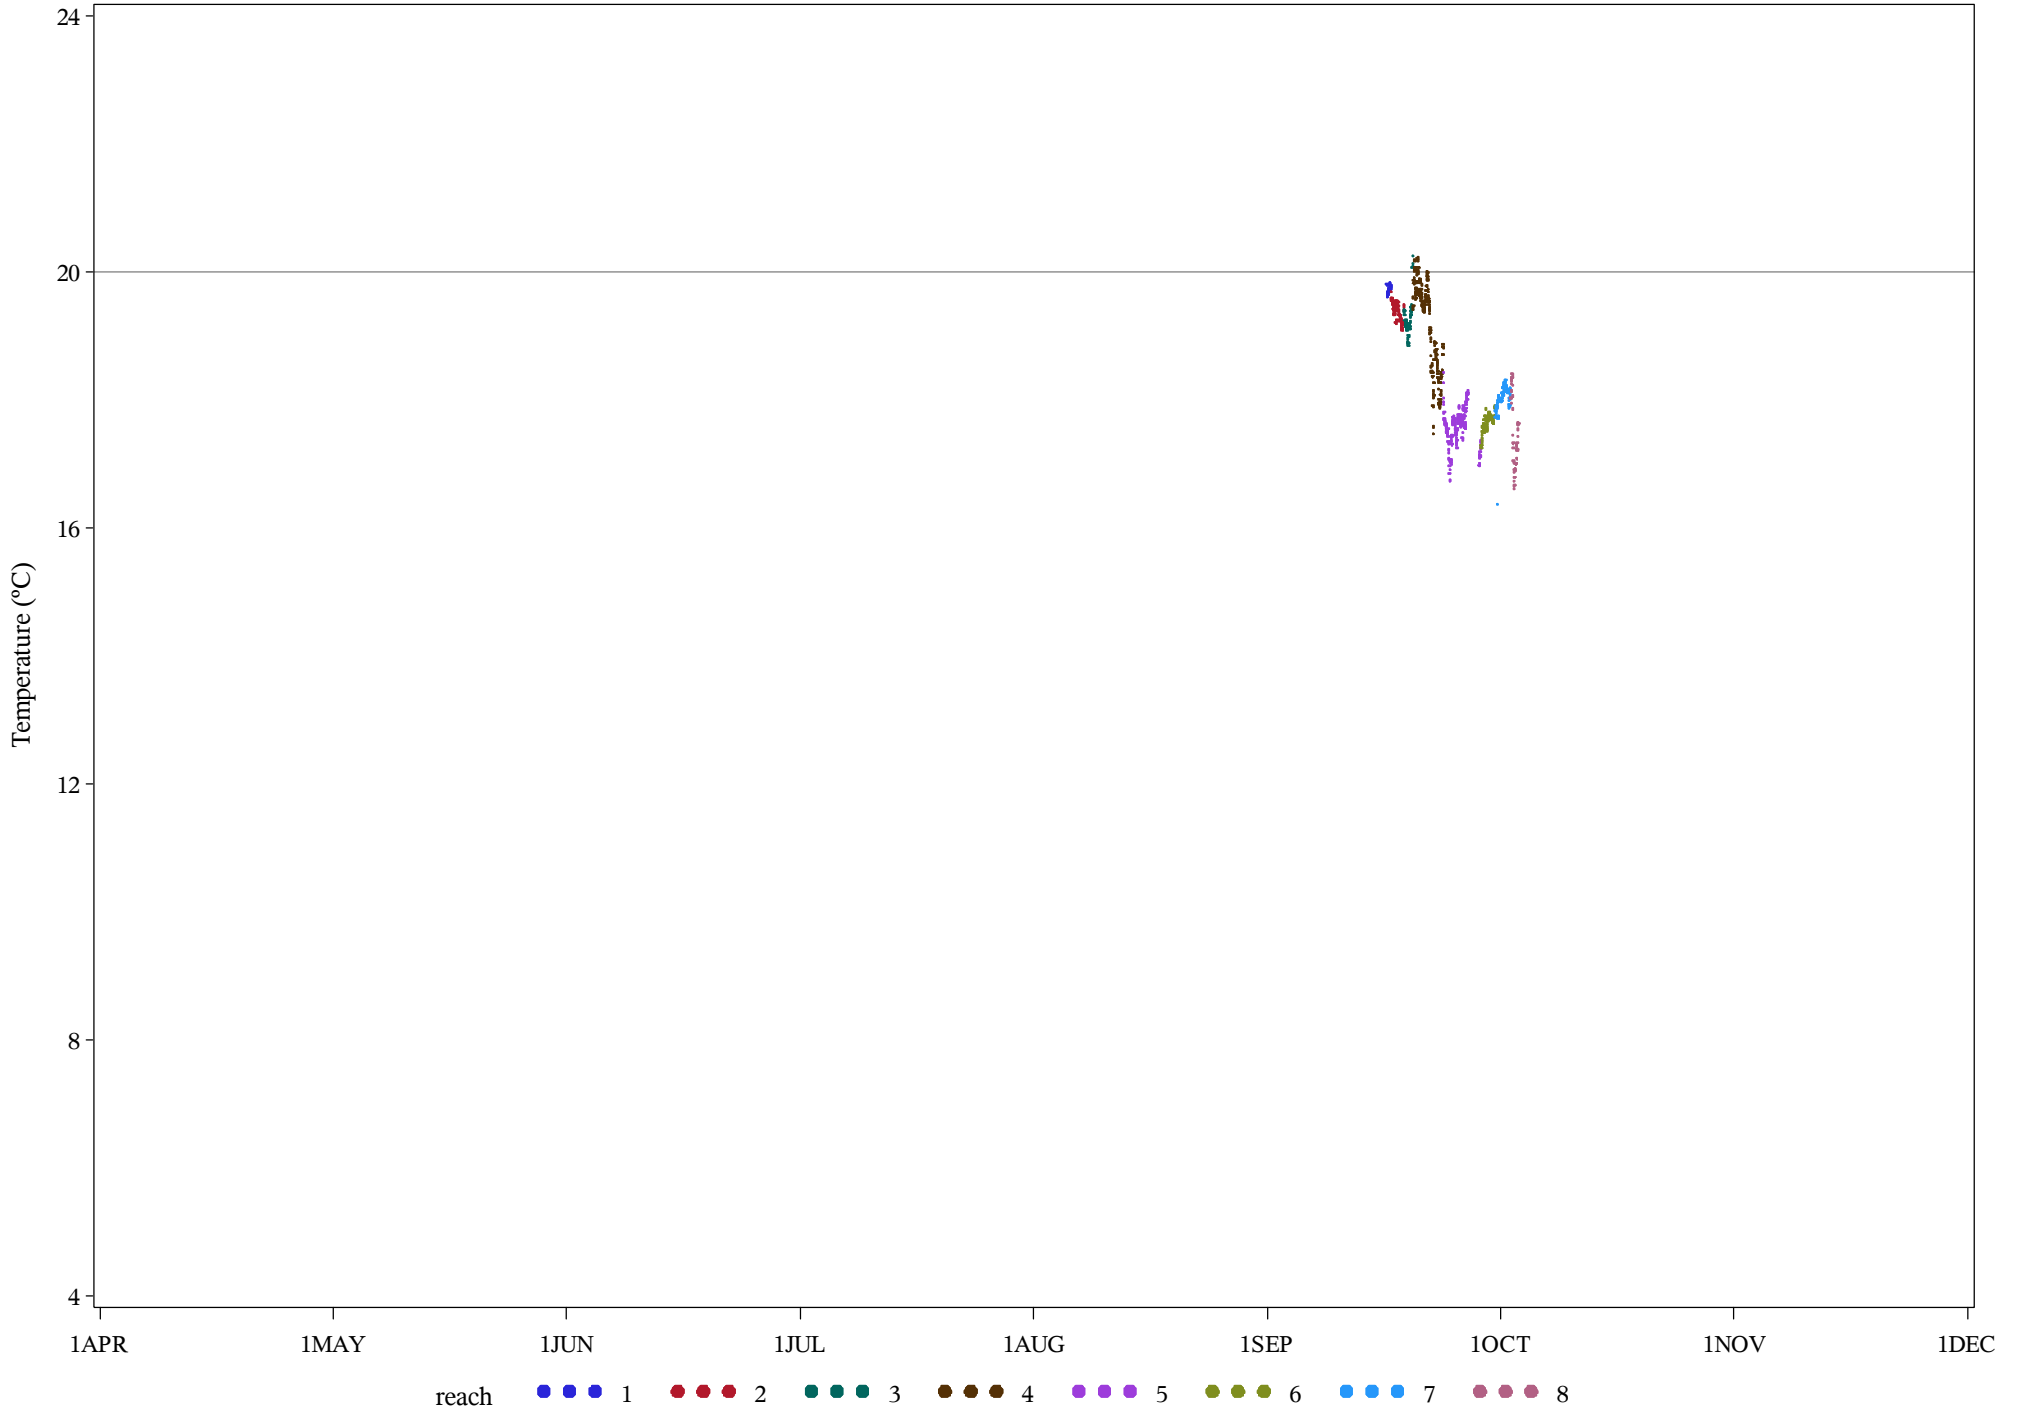







# Spring Chinook 2480A

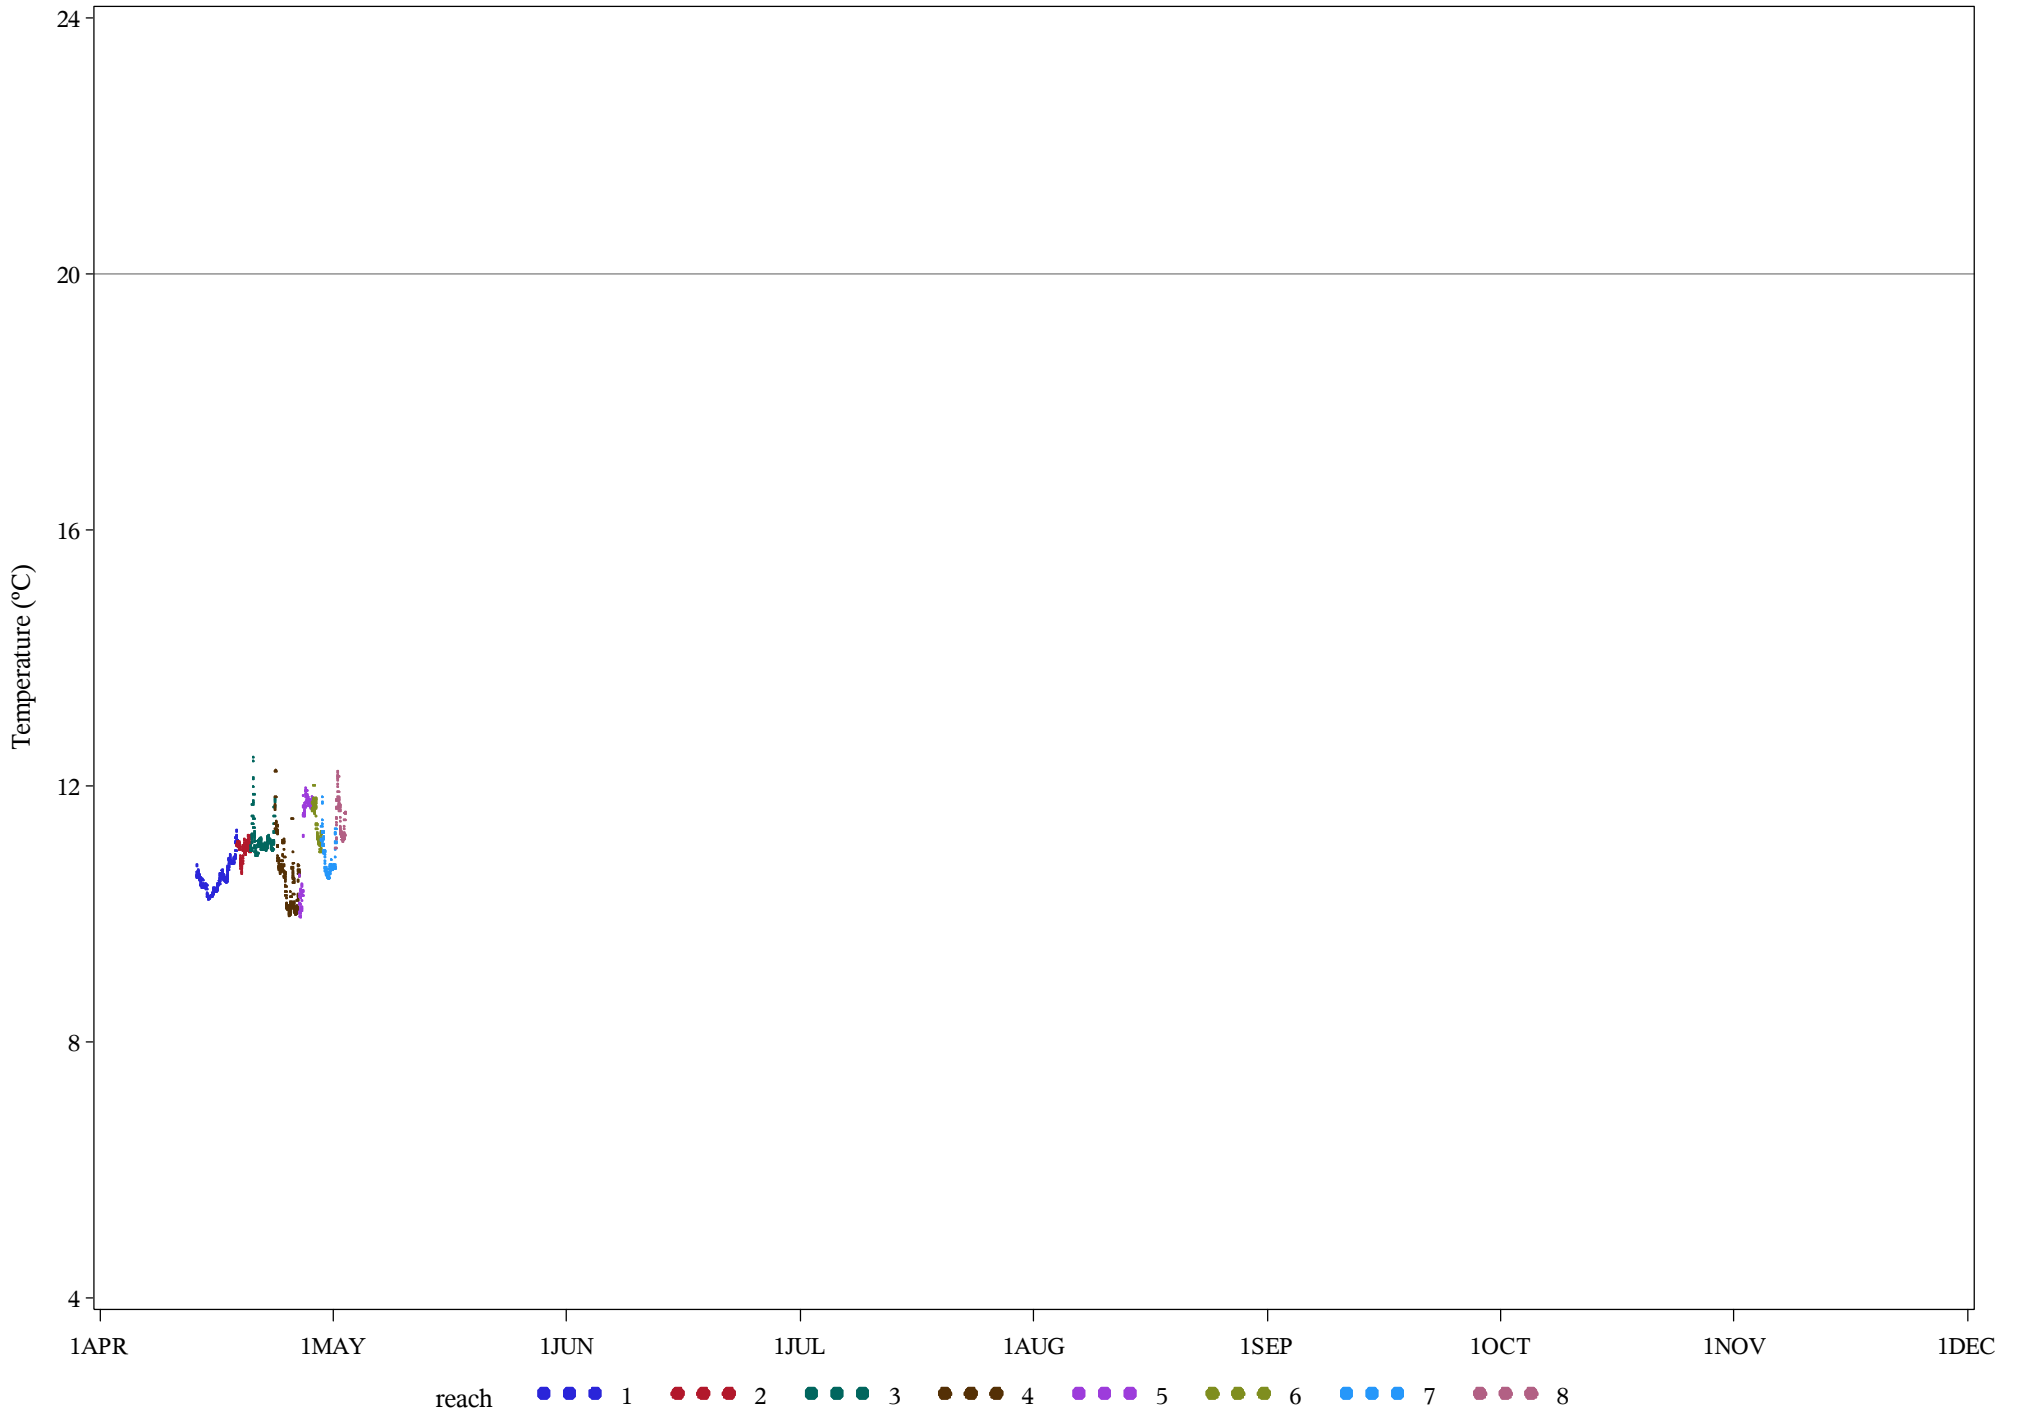

# Spring Chinook 2480B

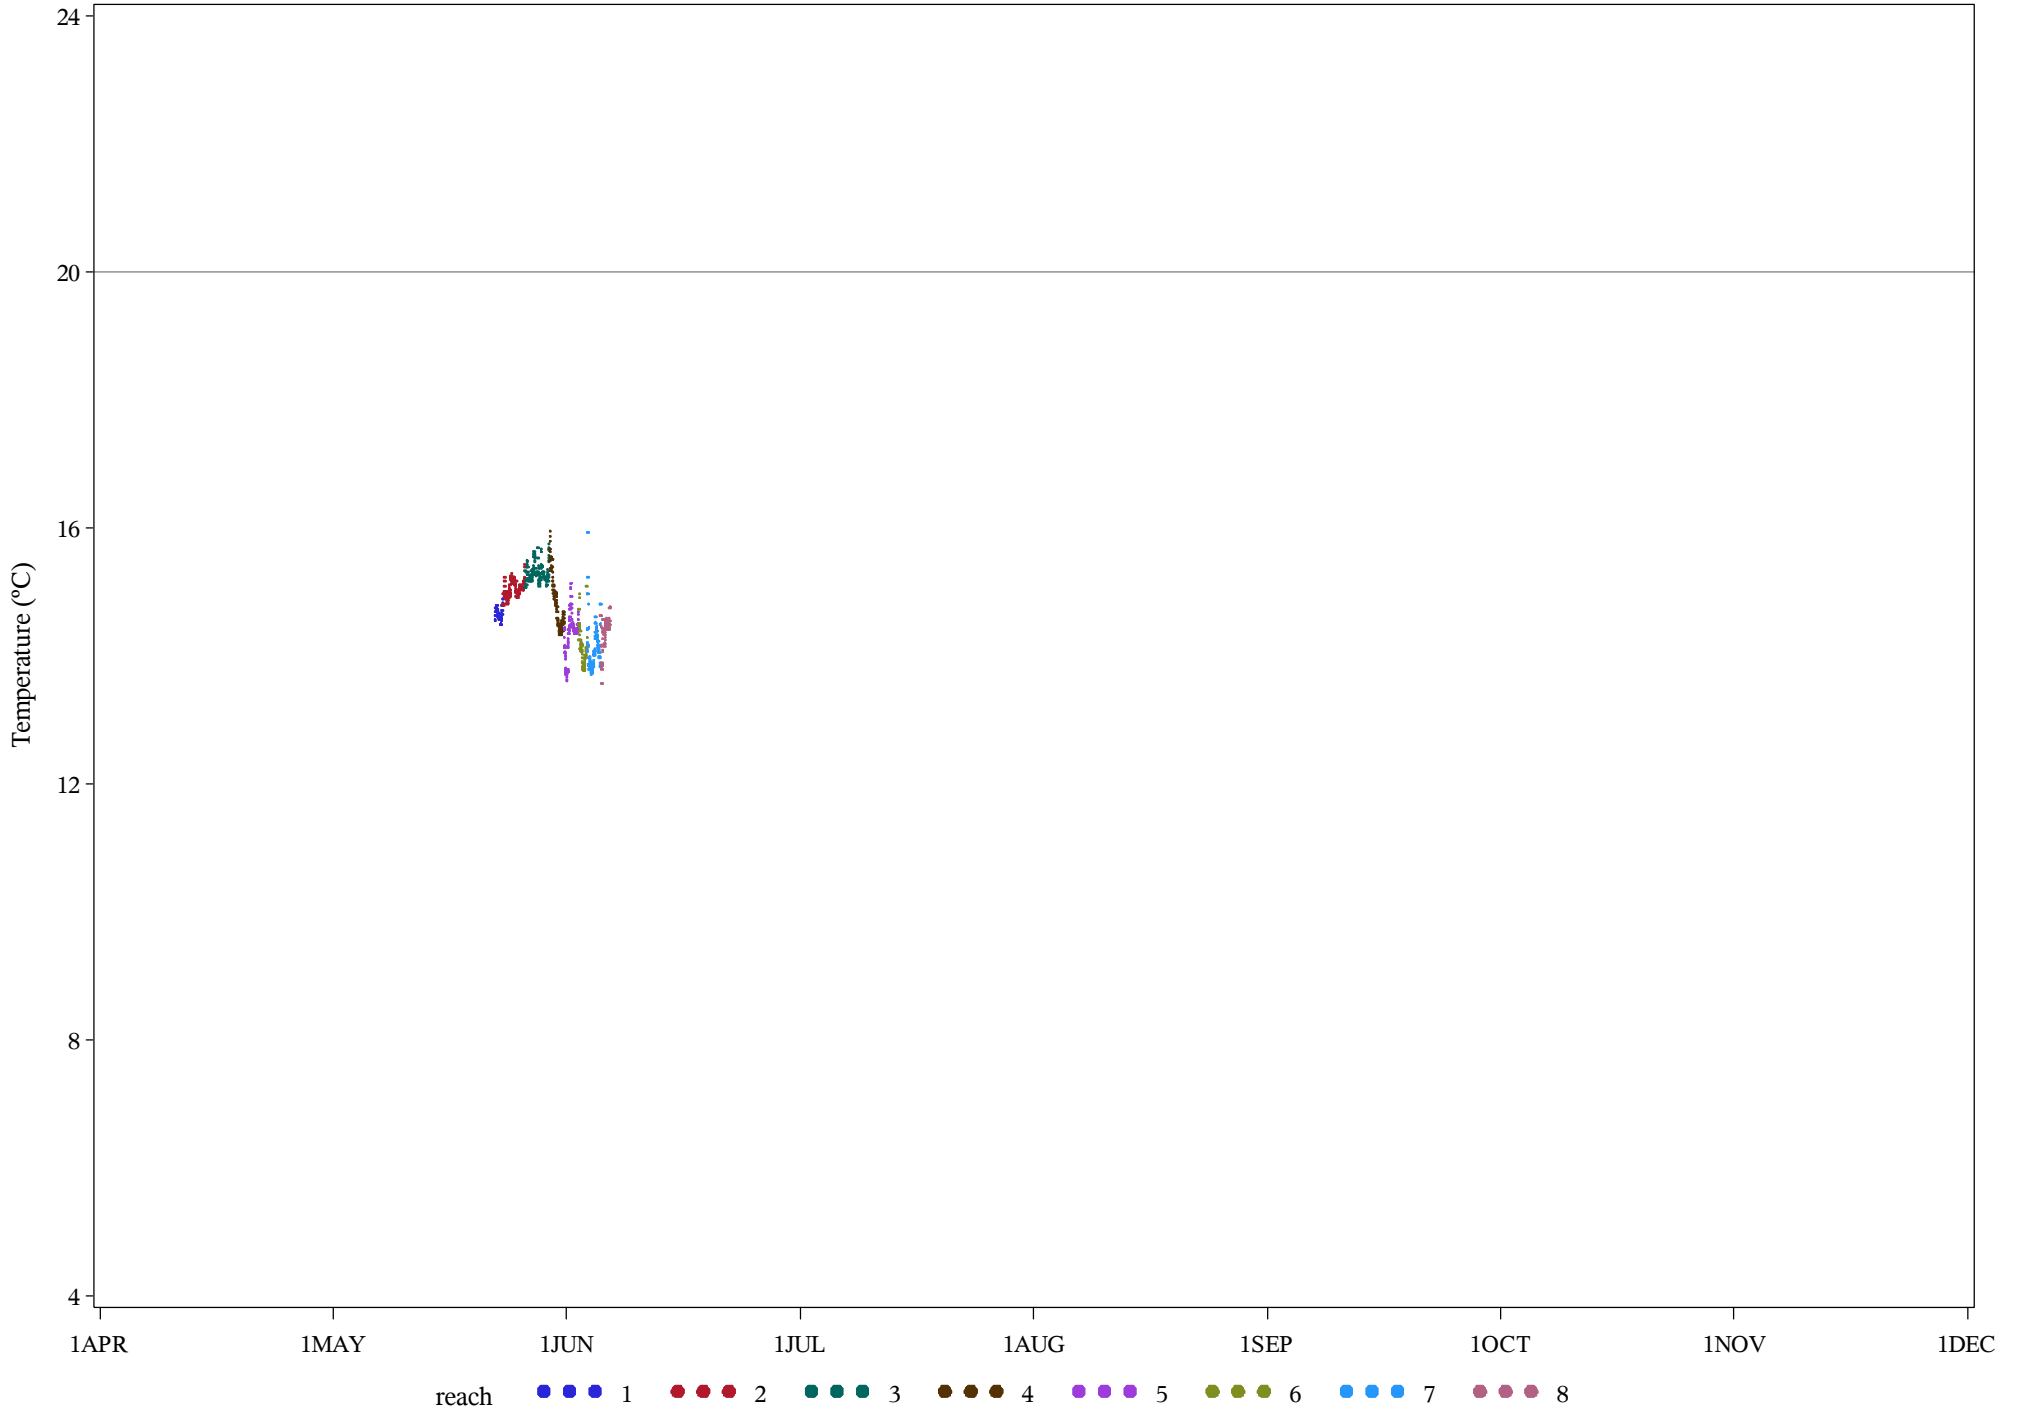

# Spring Chinook 2483A

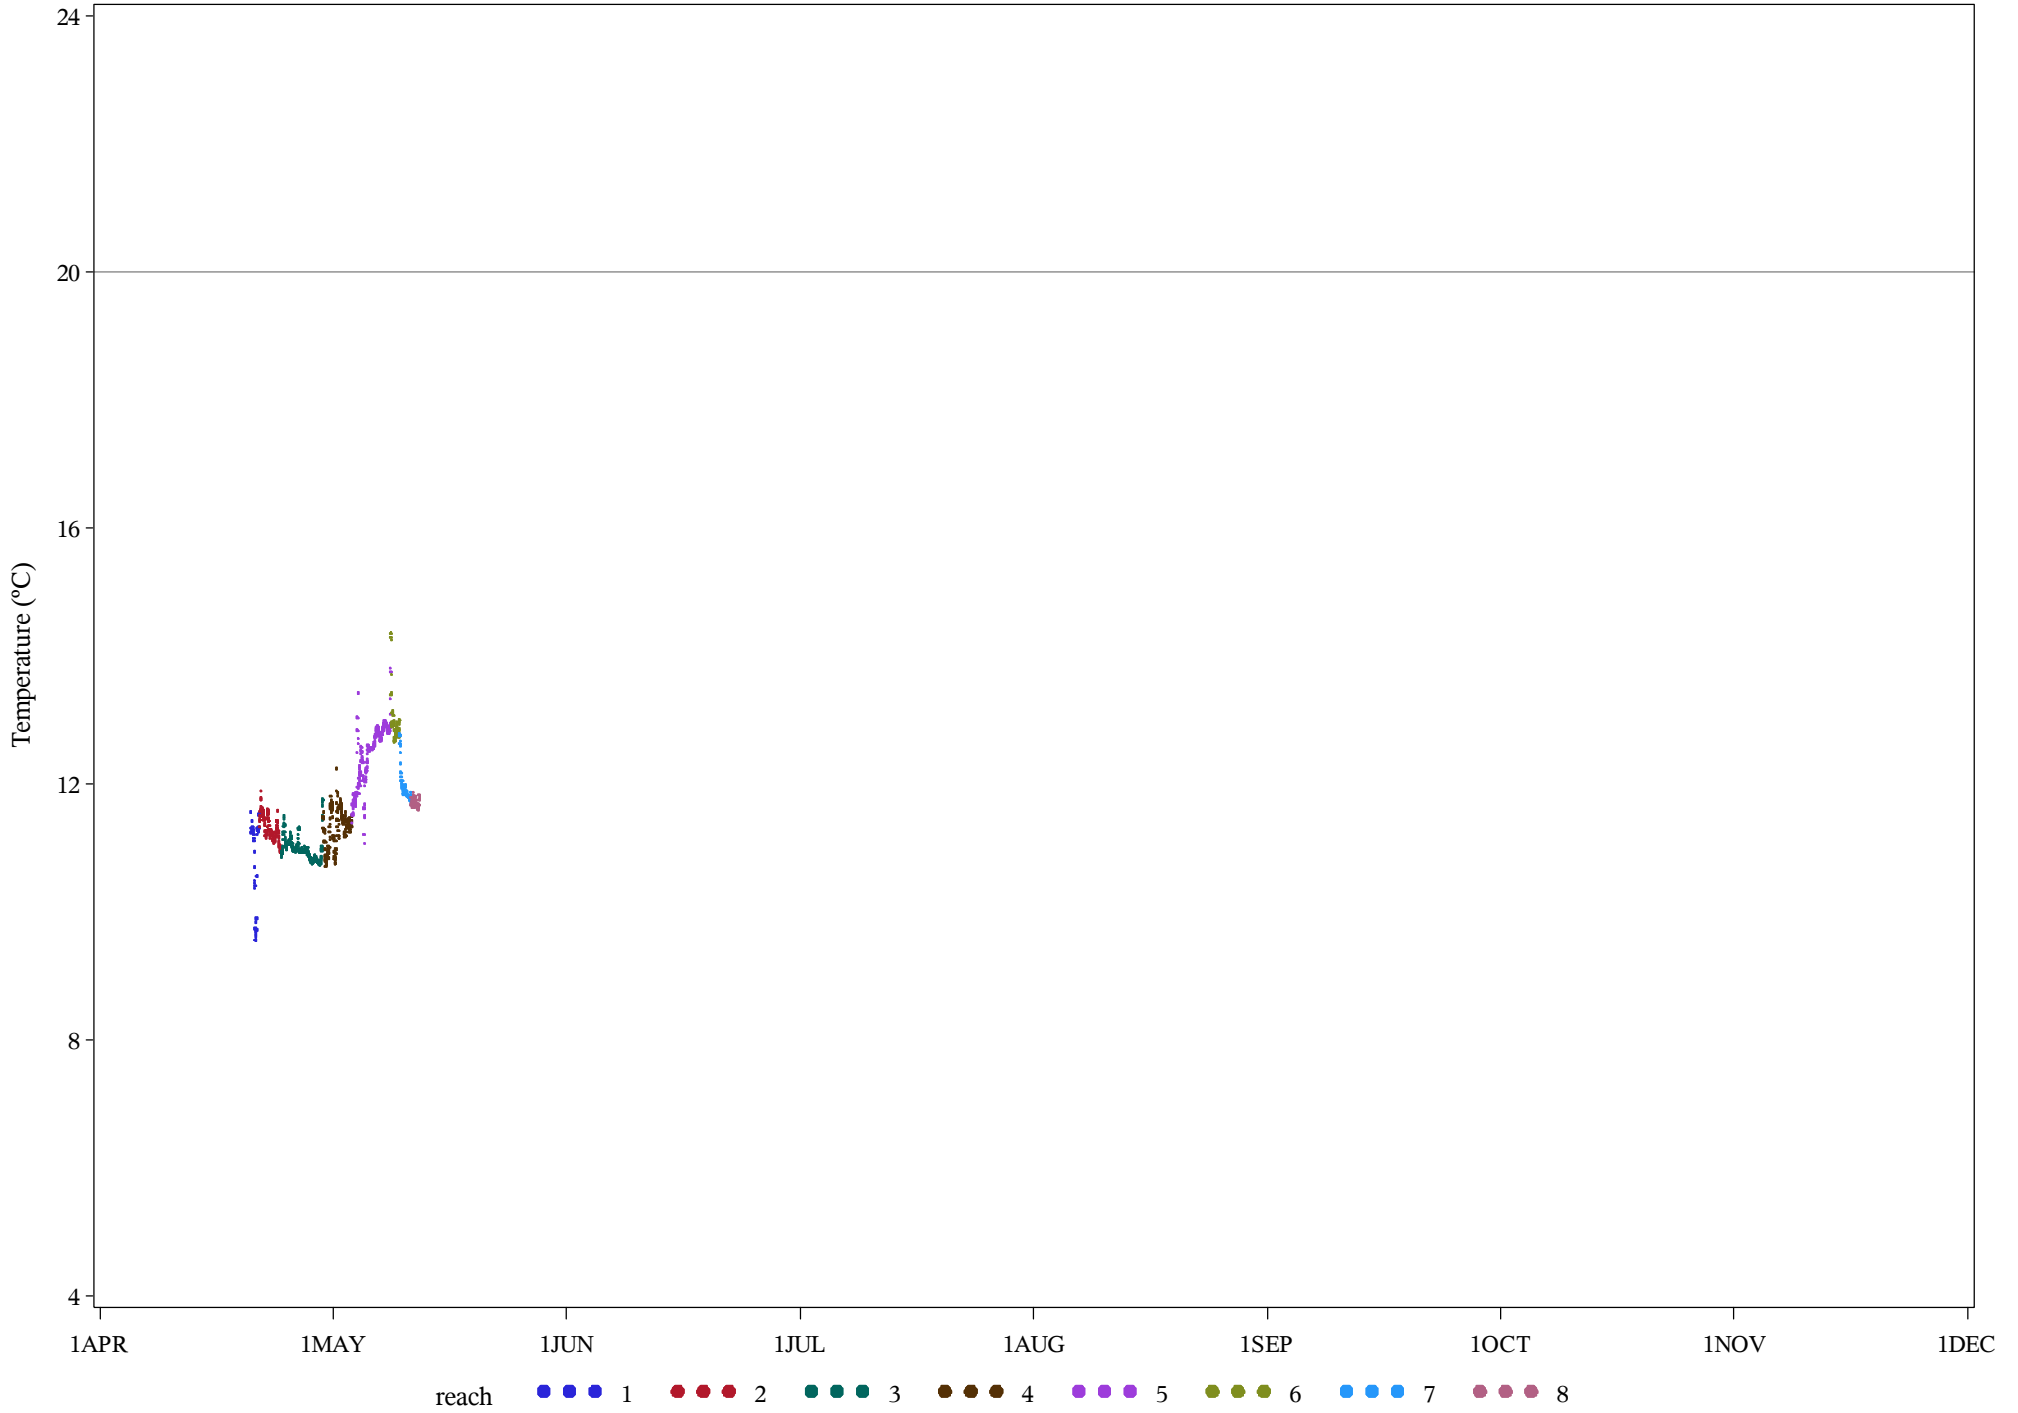

# Spring Chinook 2487A

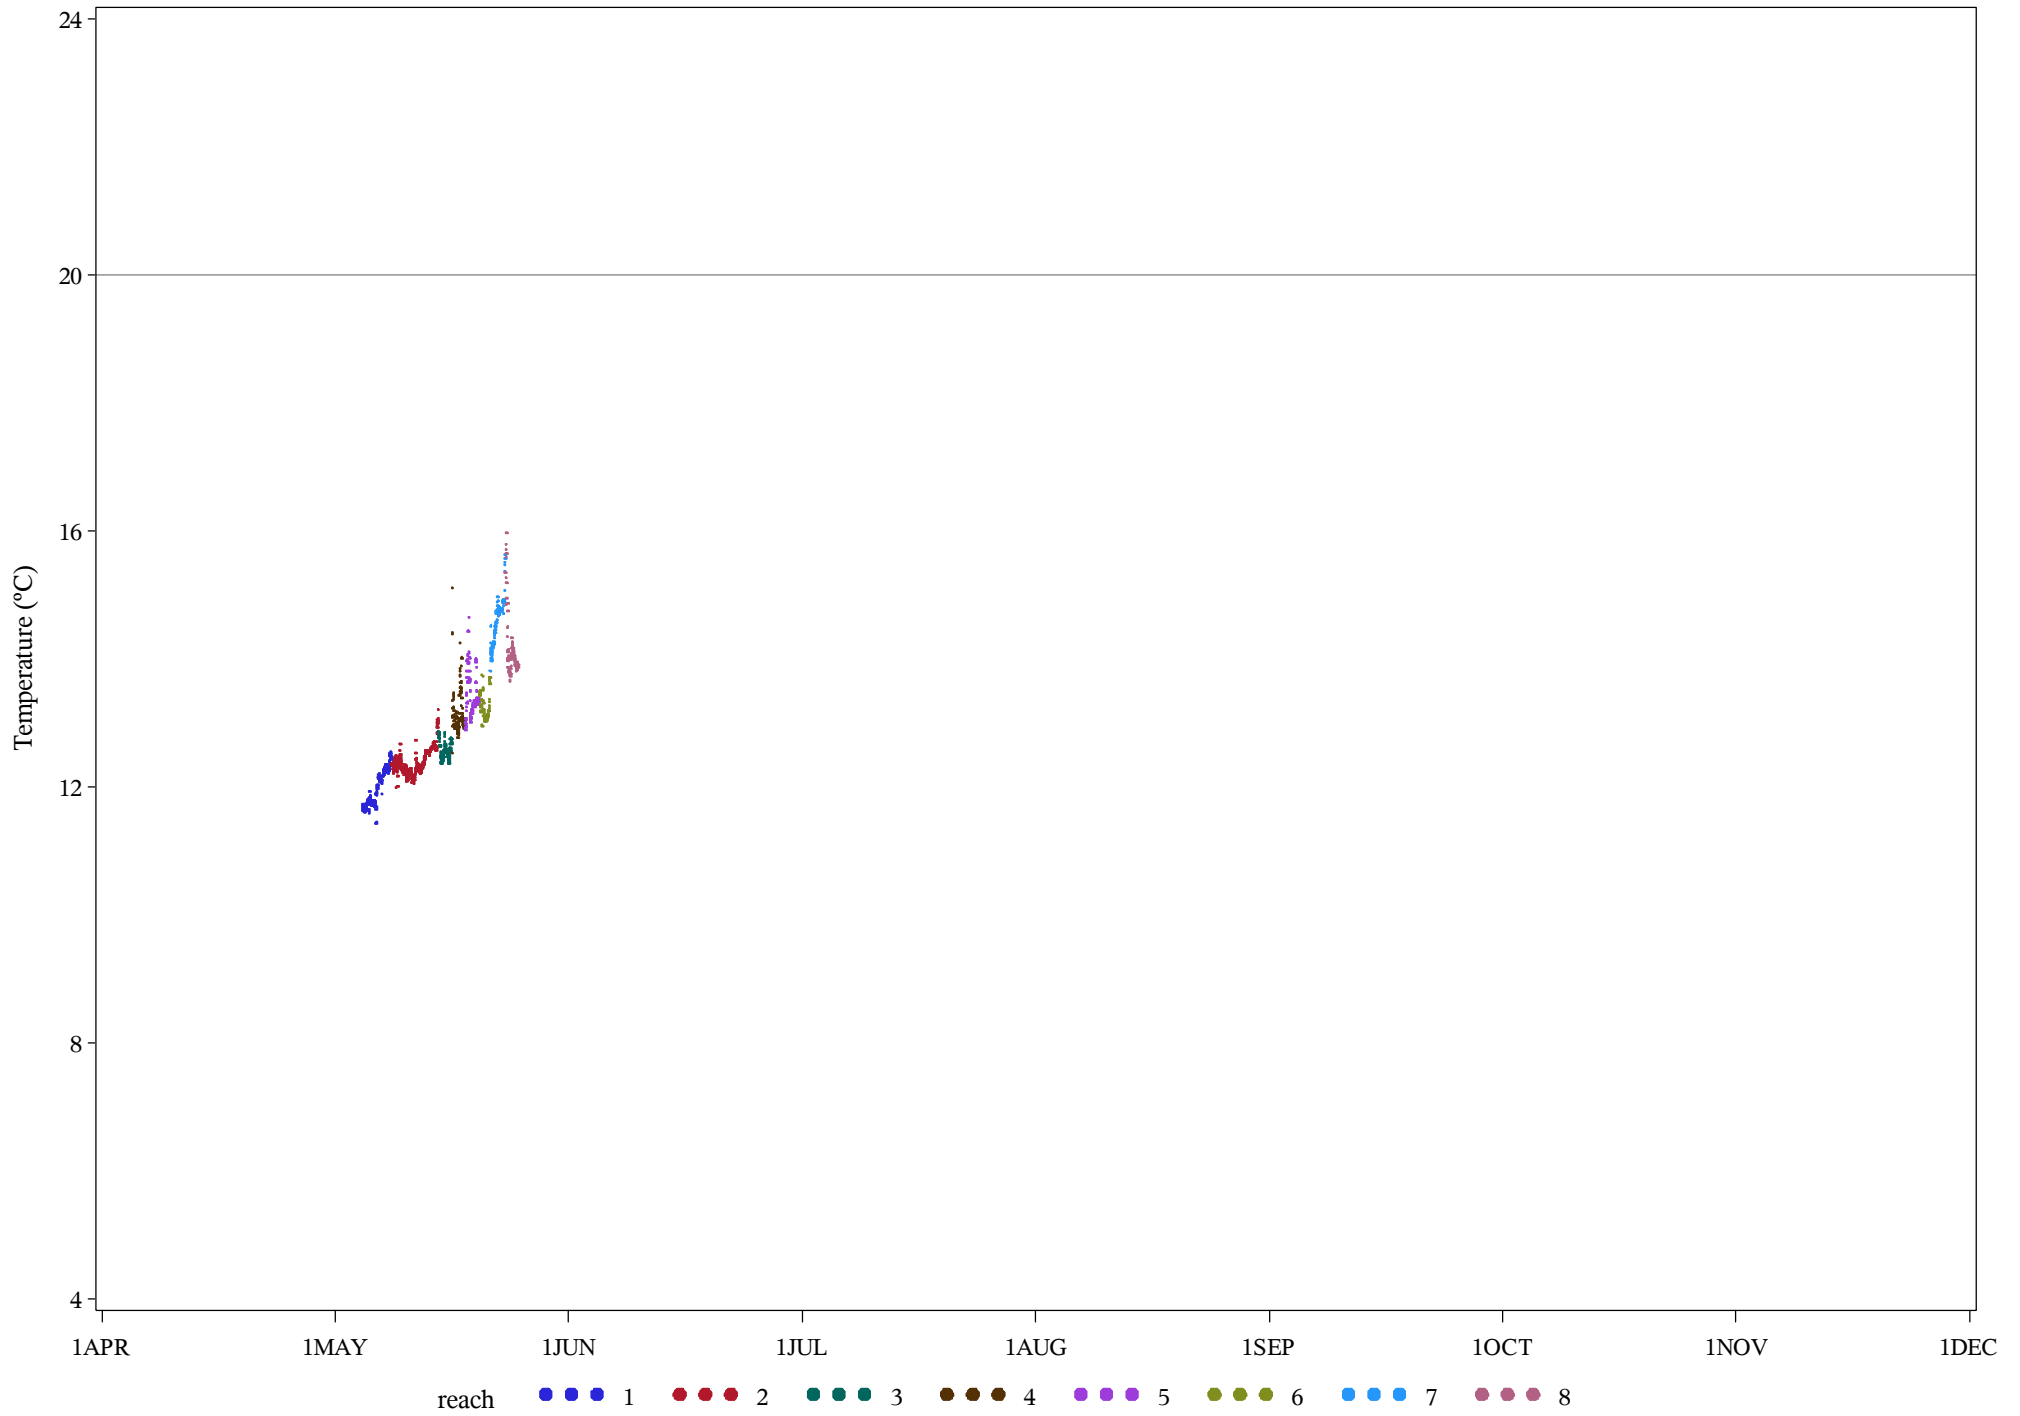

# Spring Chinook 2504A

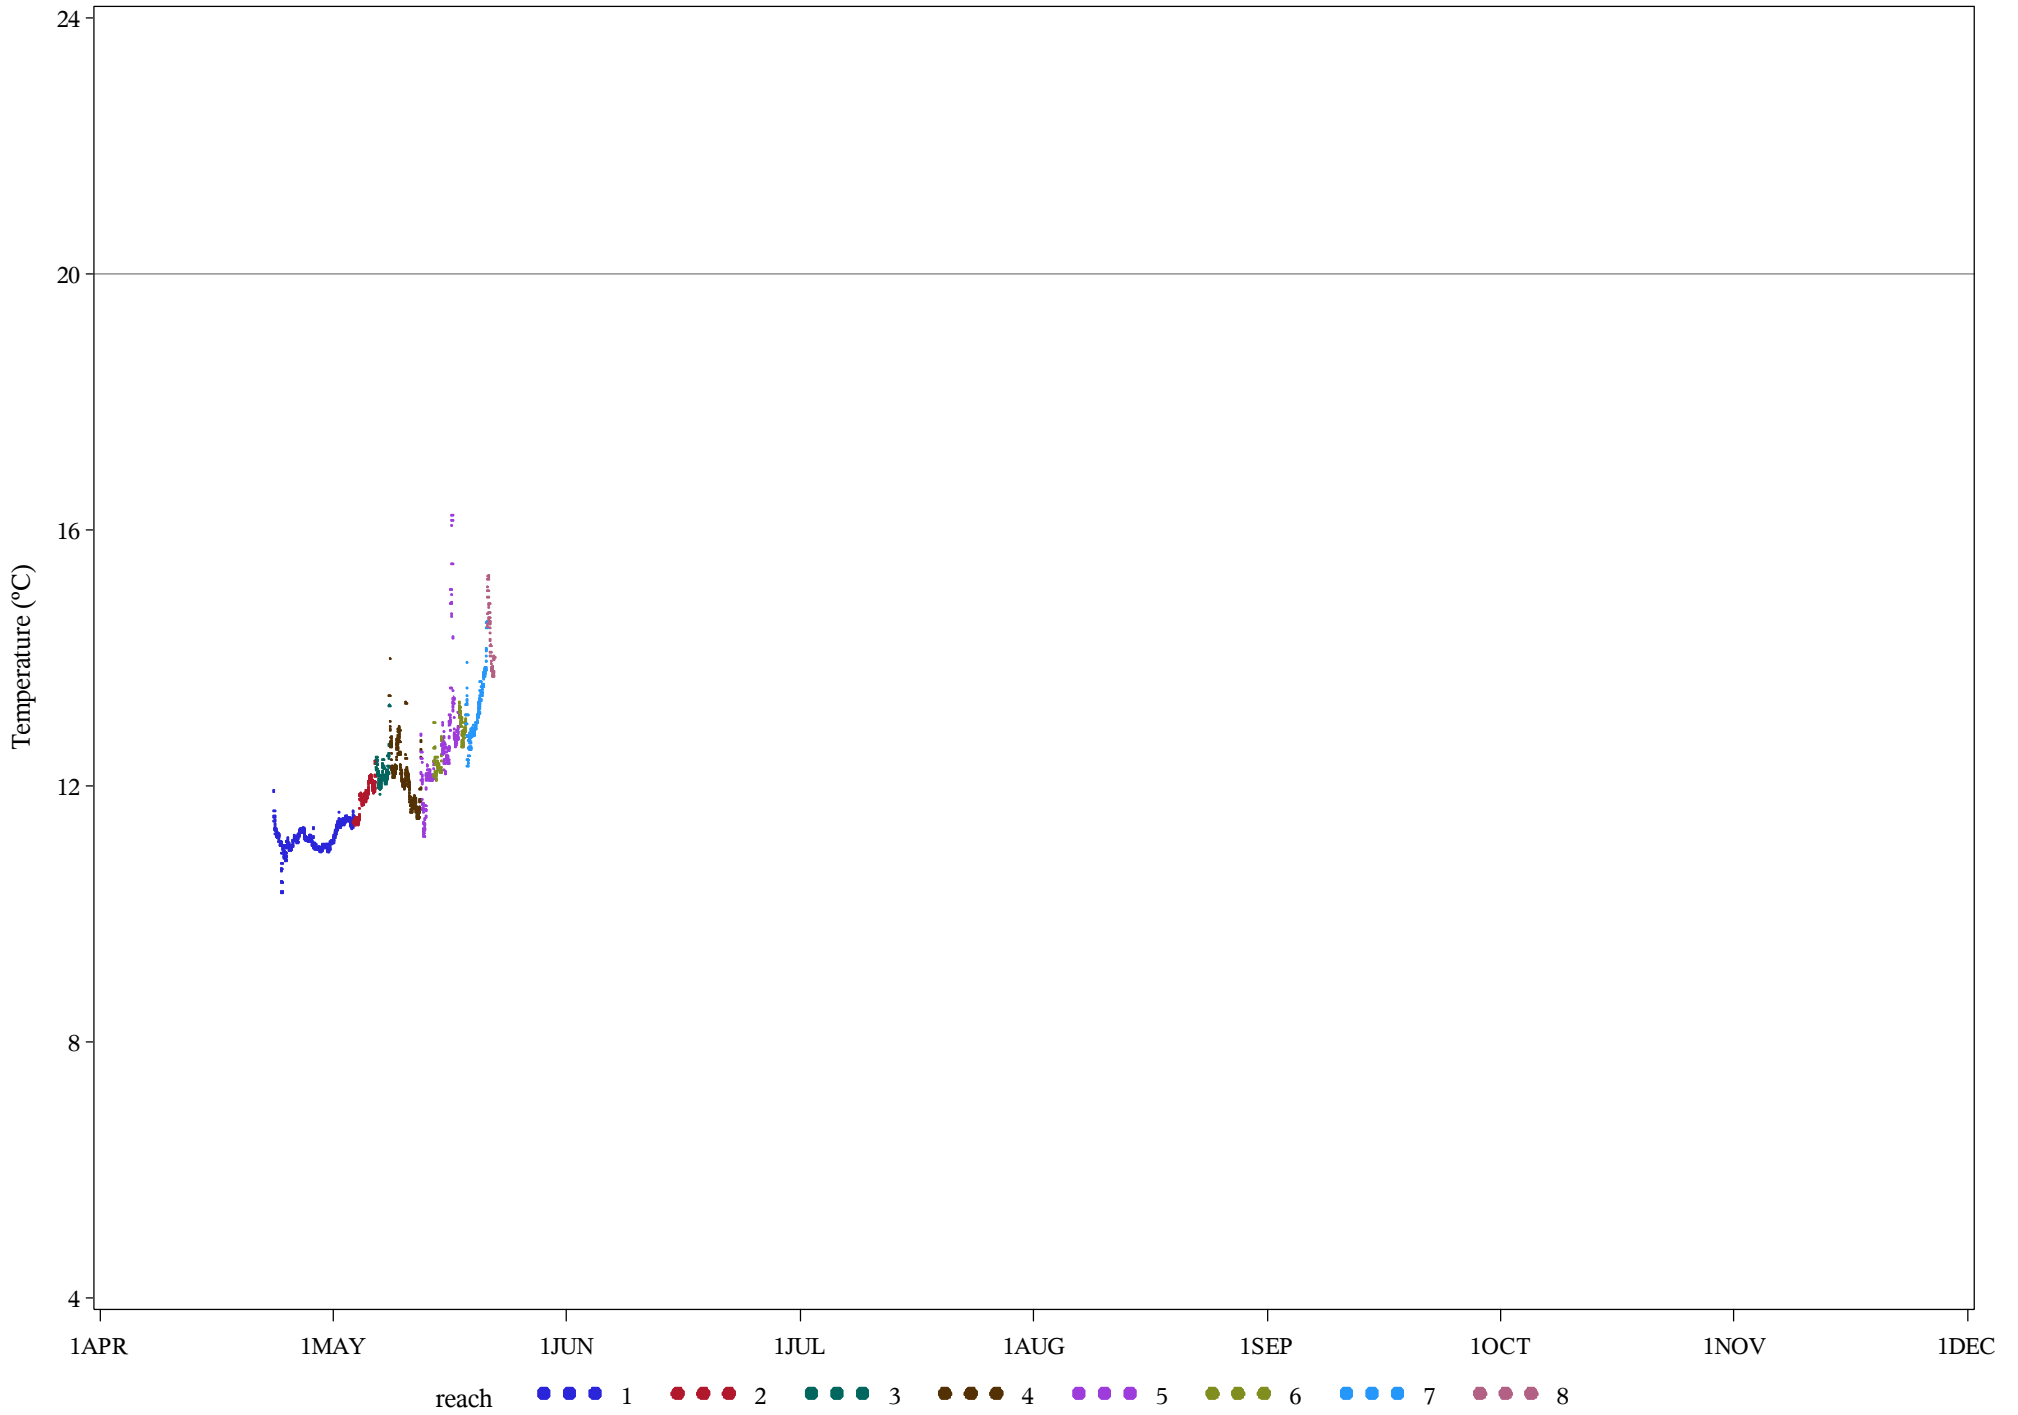

# Spring Chinook 2518A

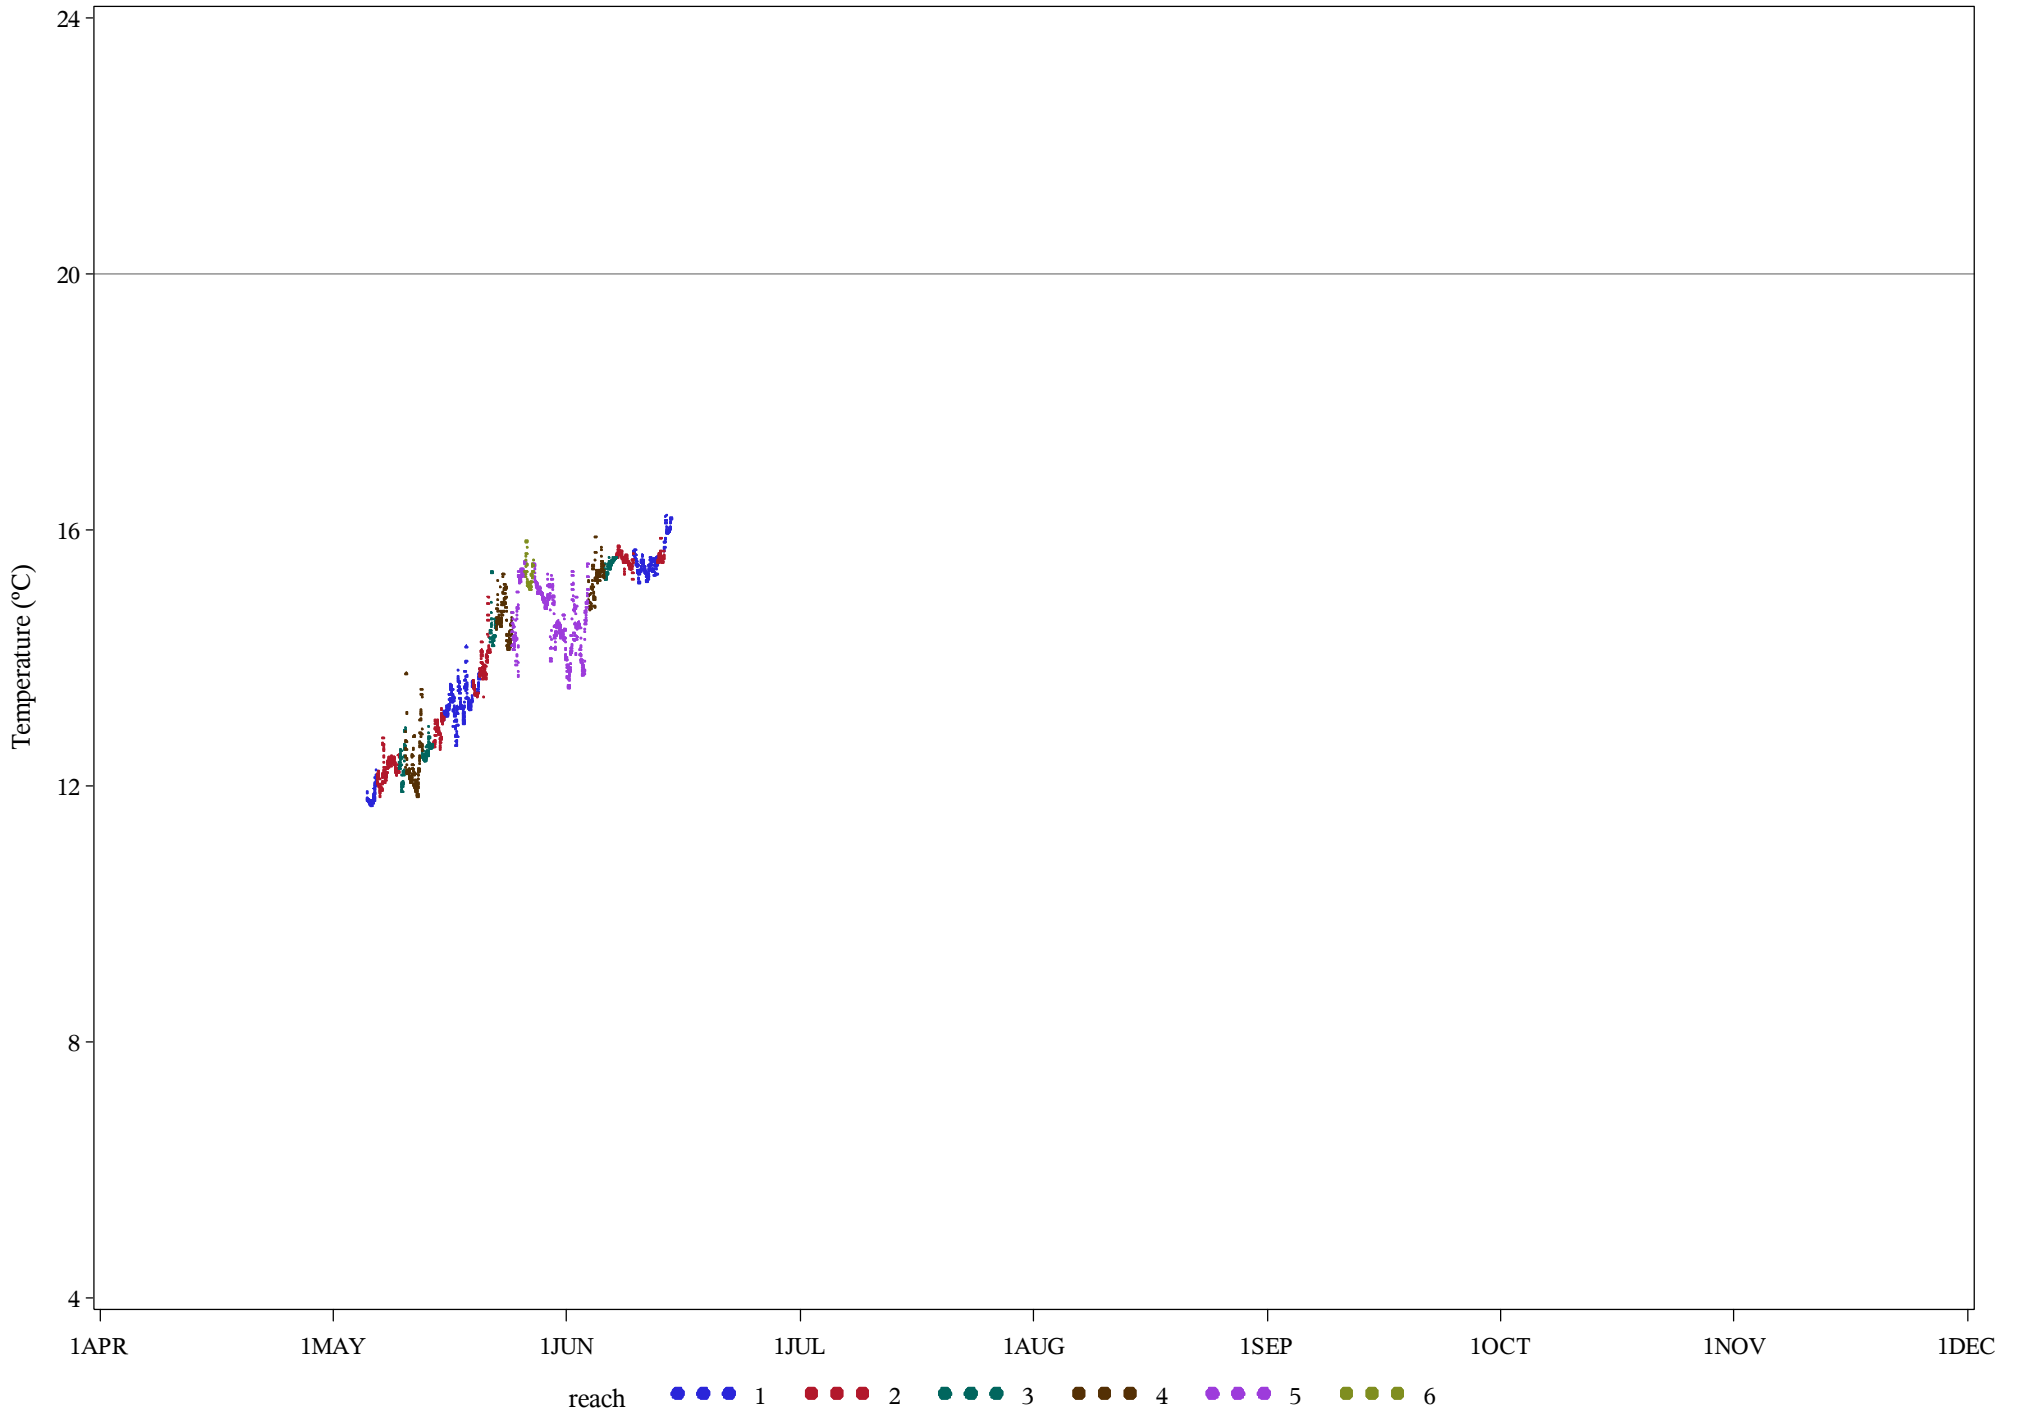





# Spring Chinook 2520A

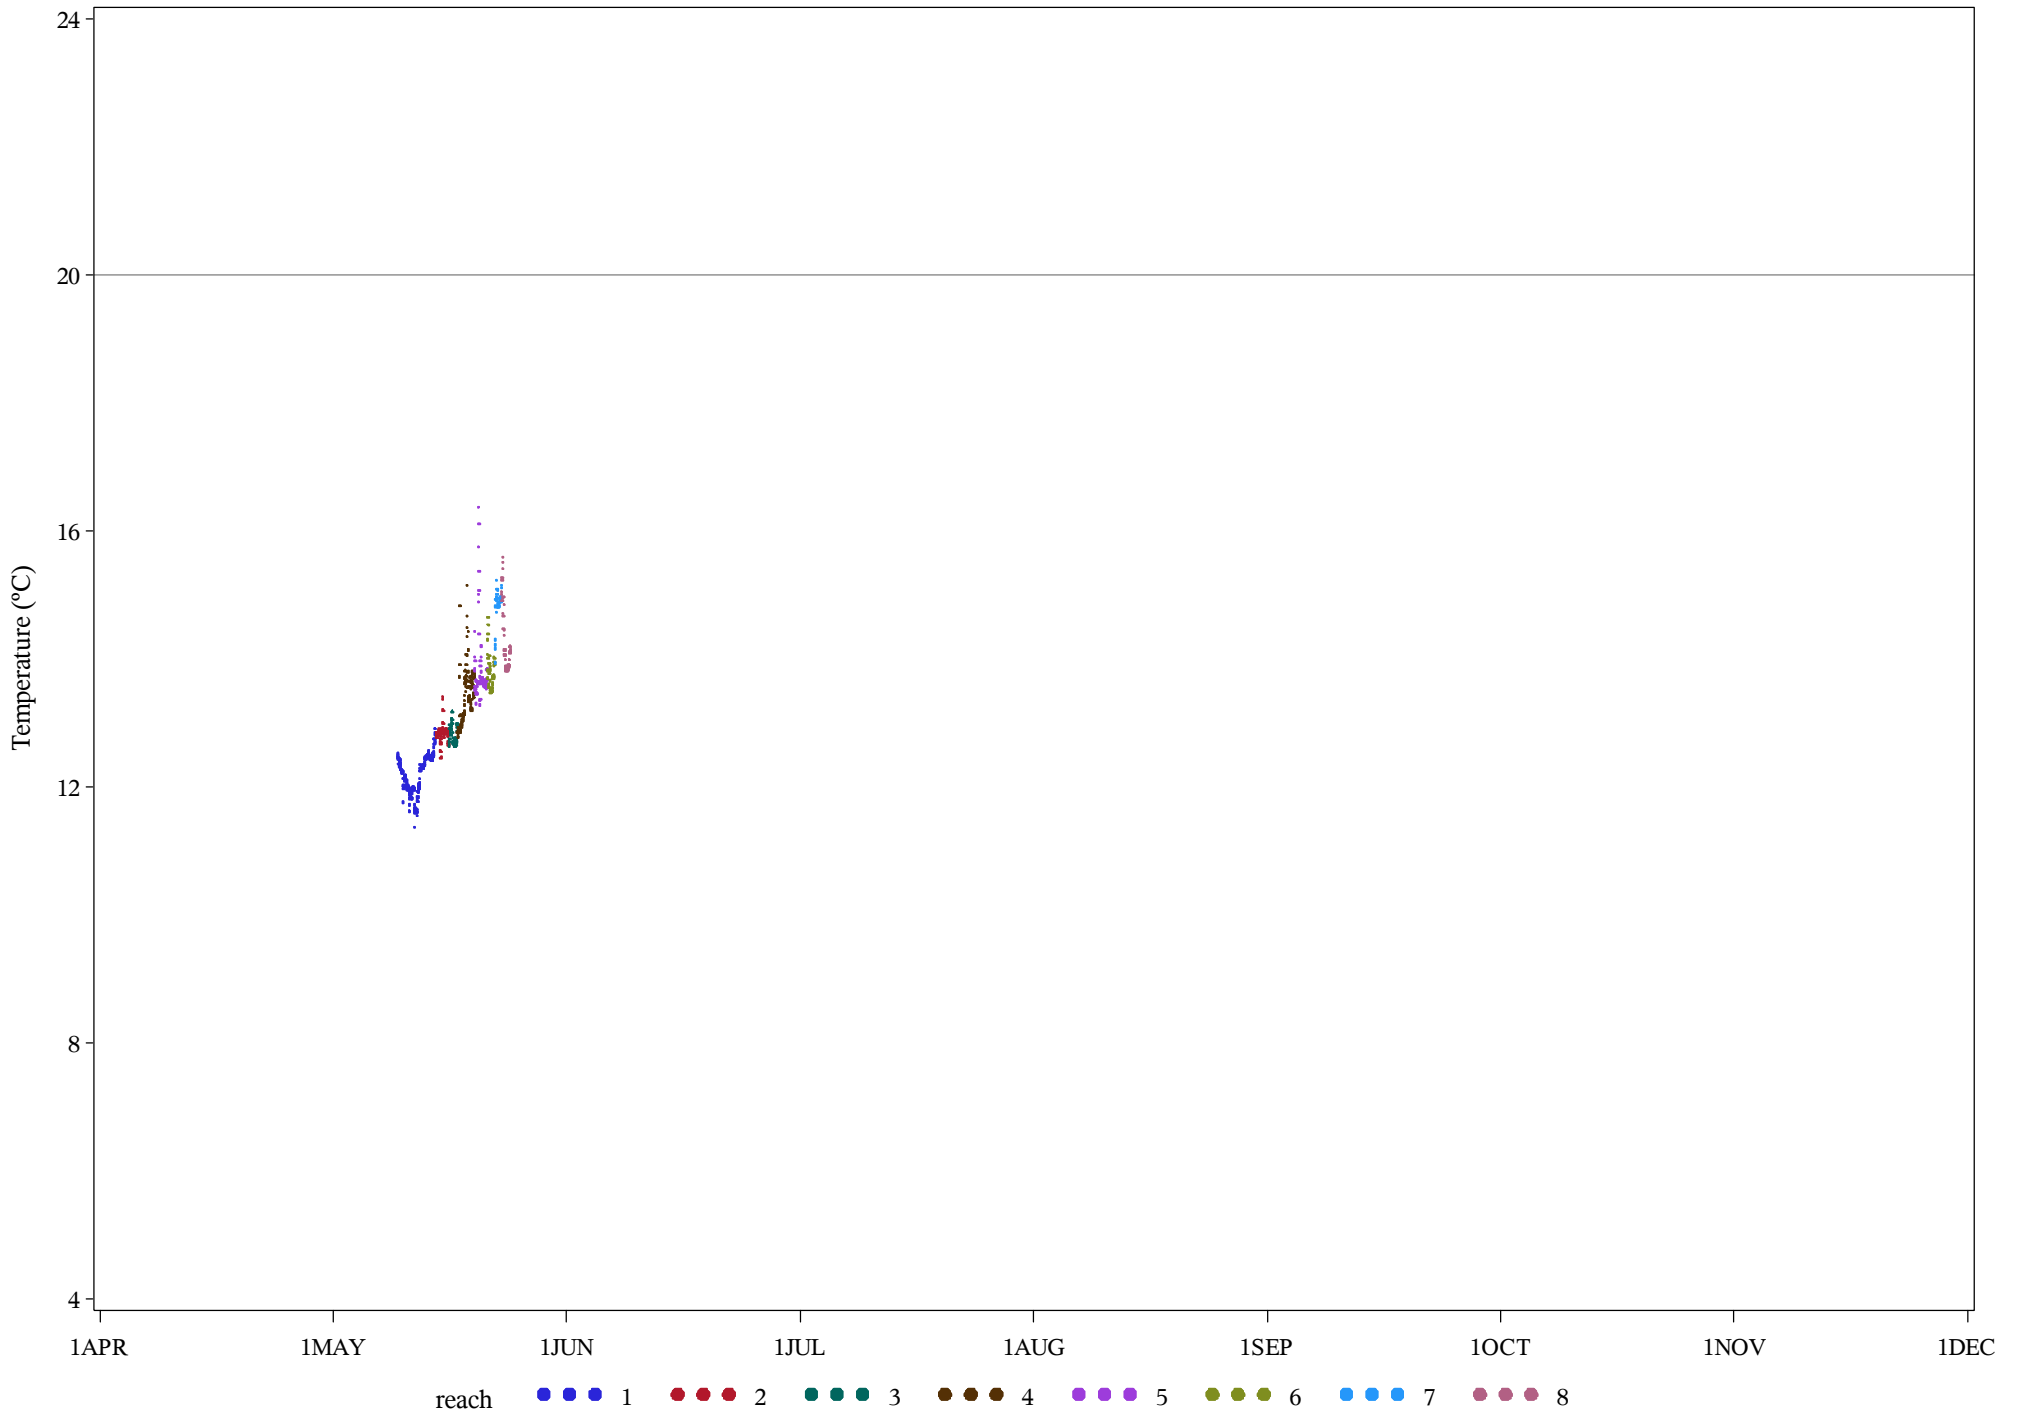





# Spring Chinook 2570A

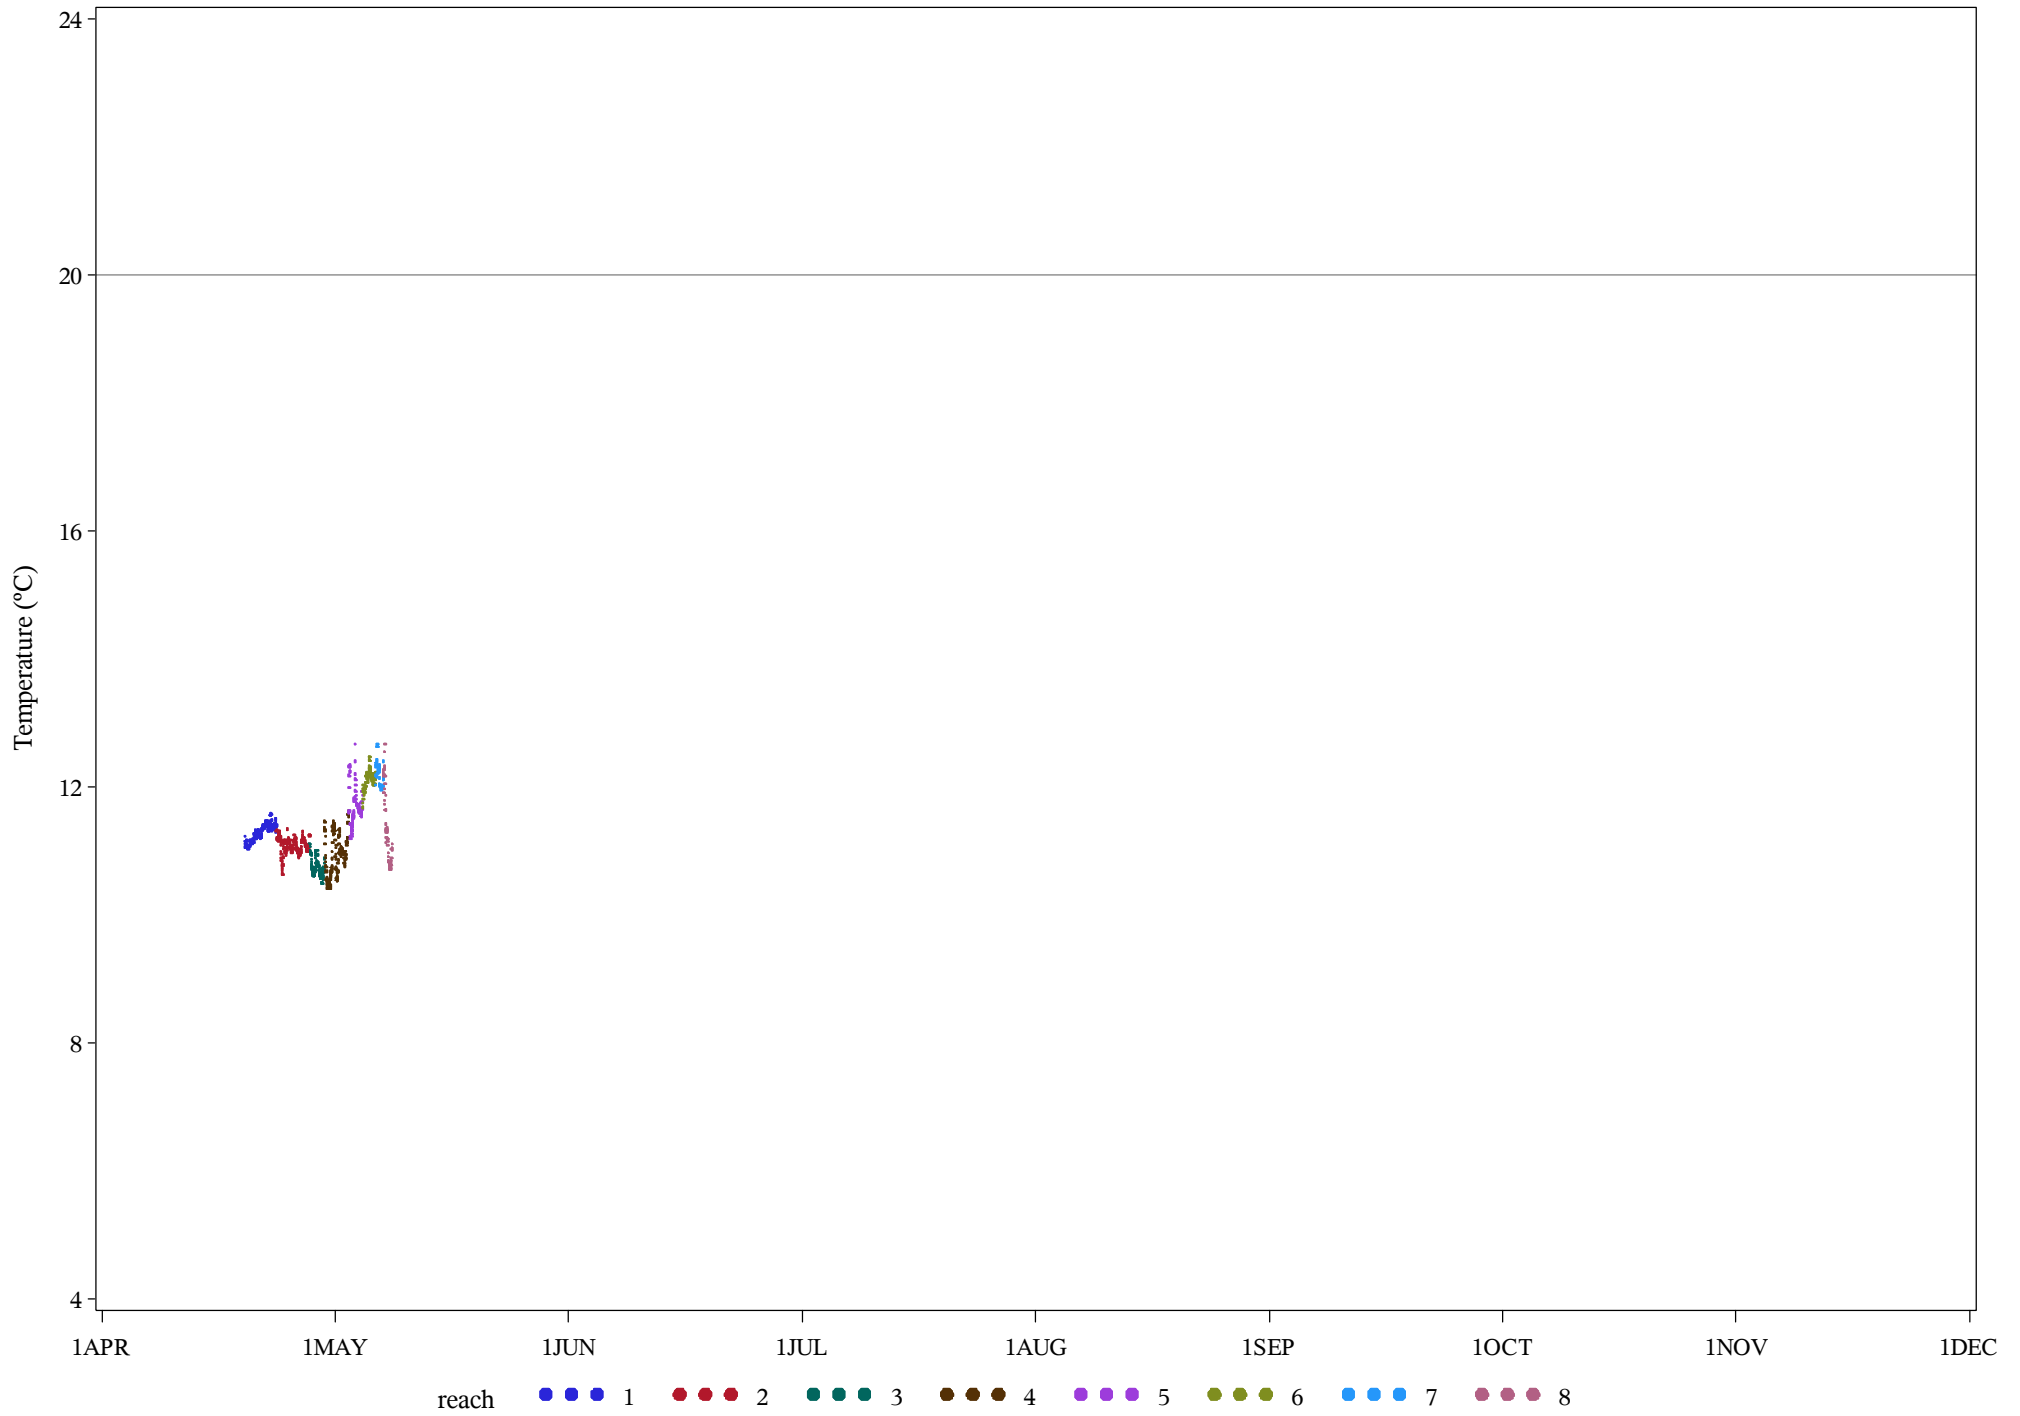

# Spring Chinook 2577A

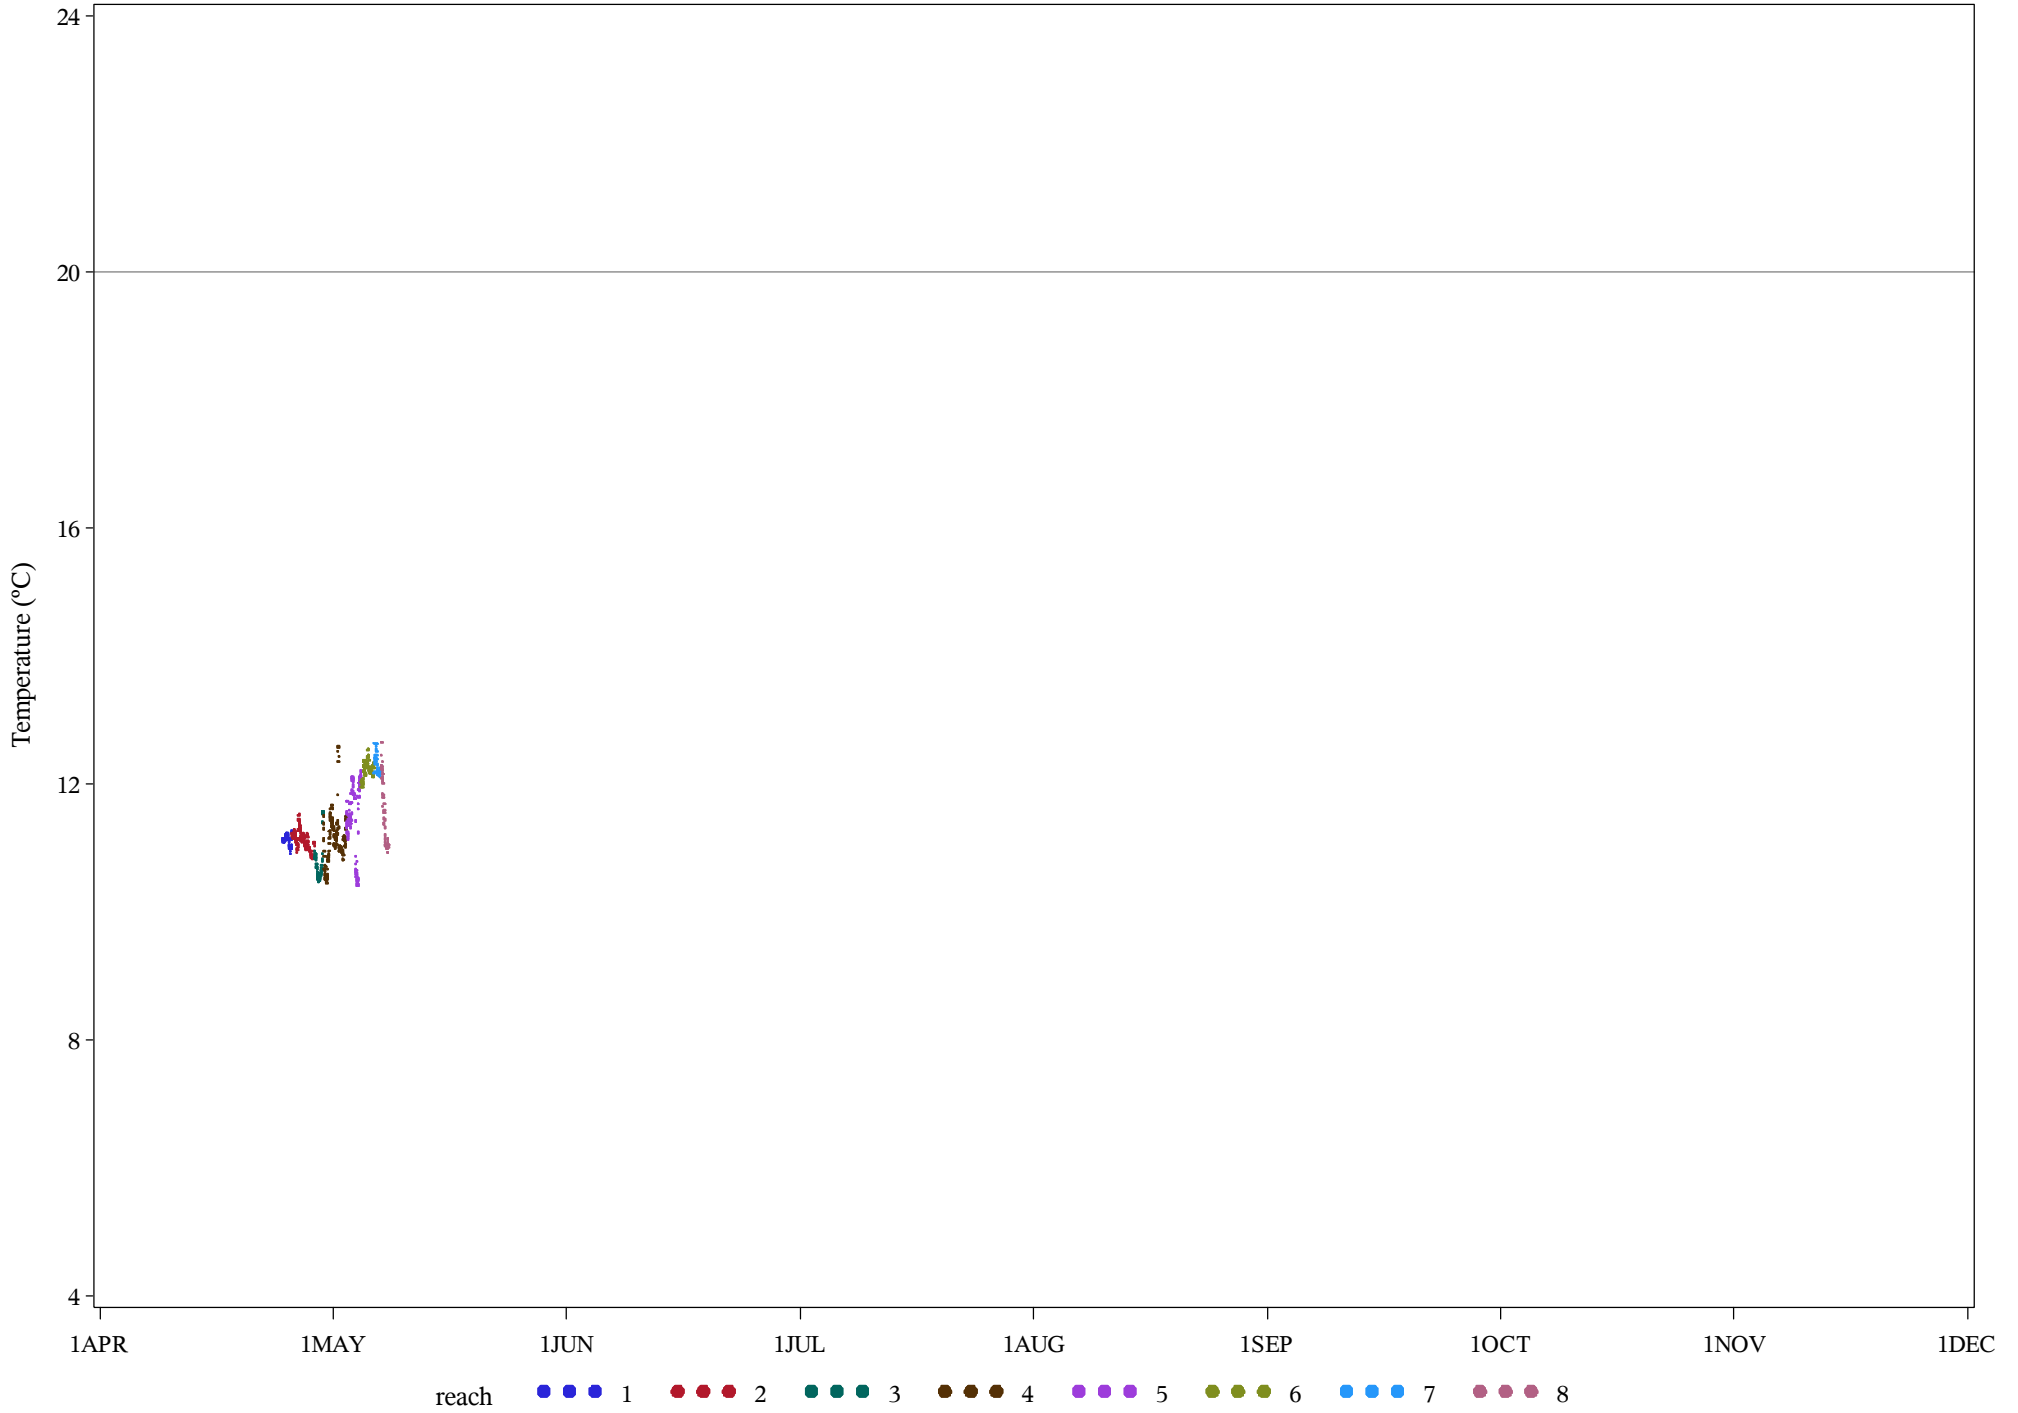

# Spring Chinook 2577B

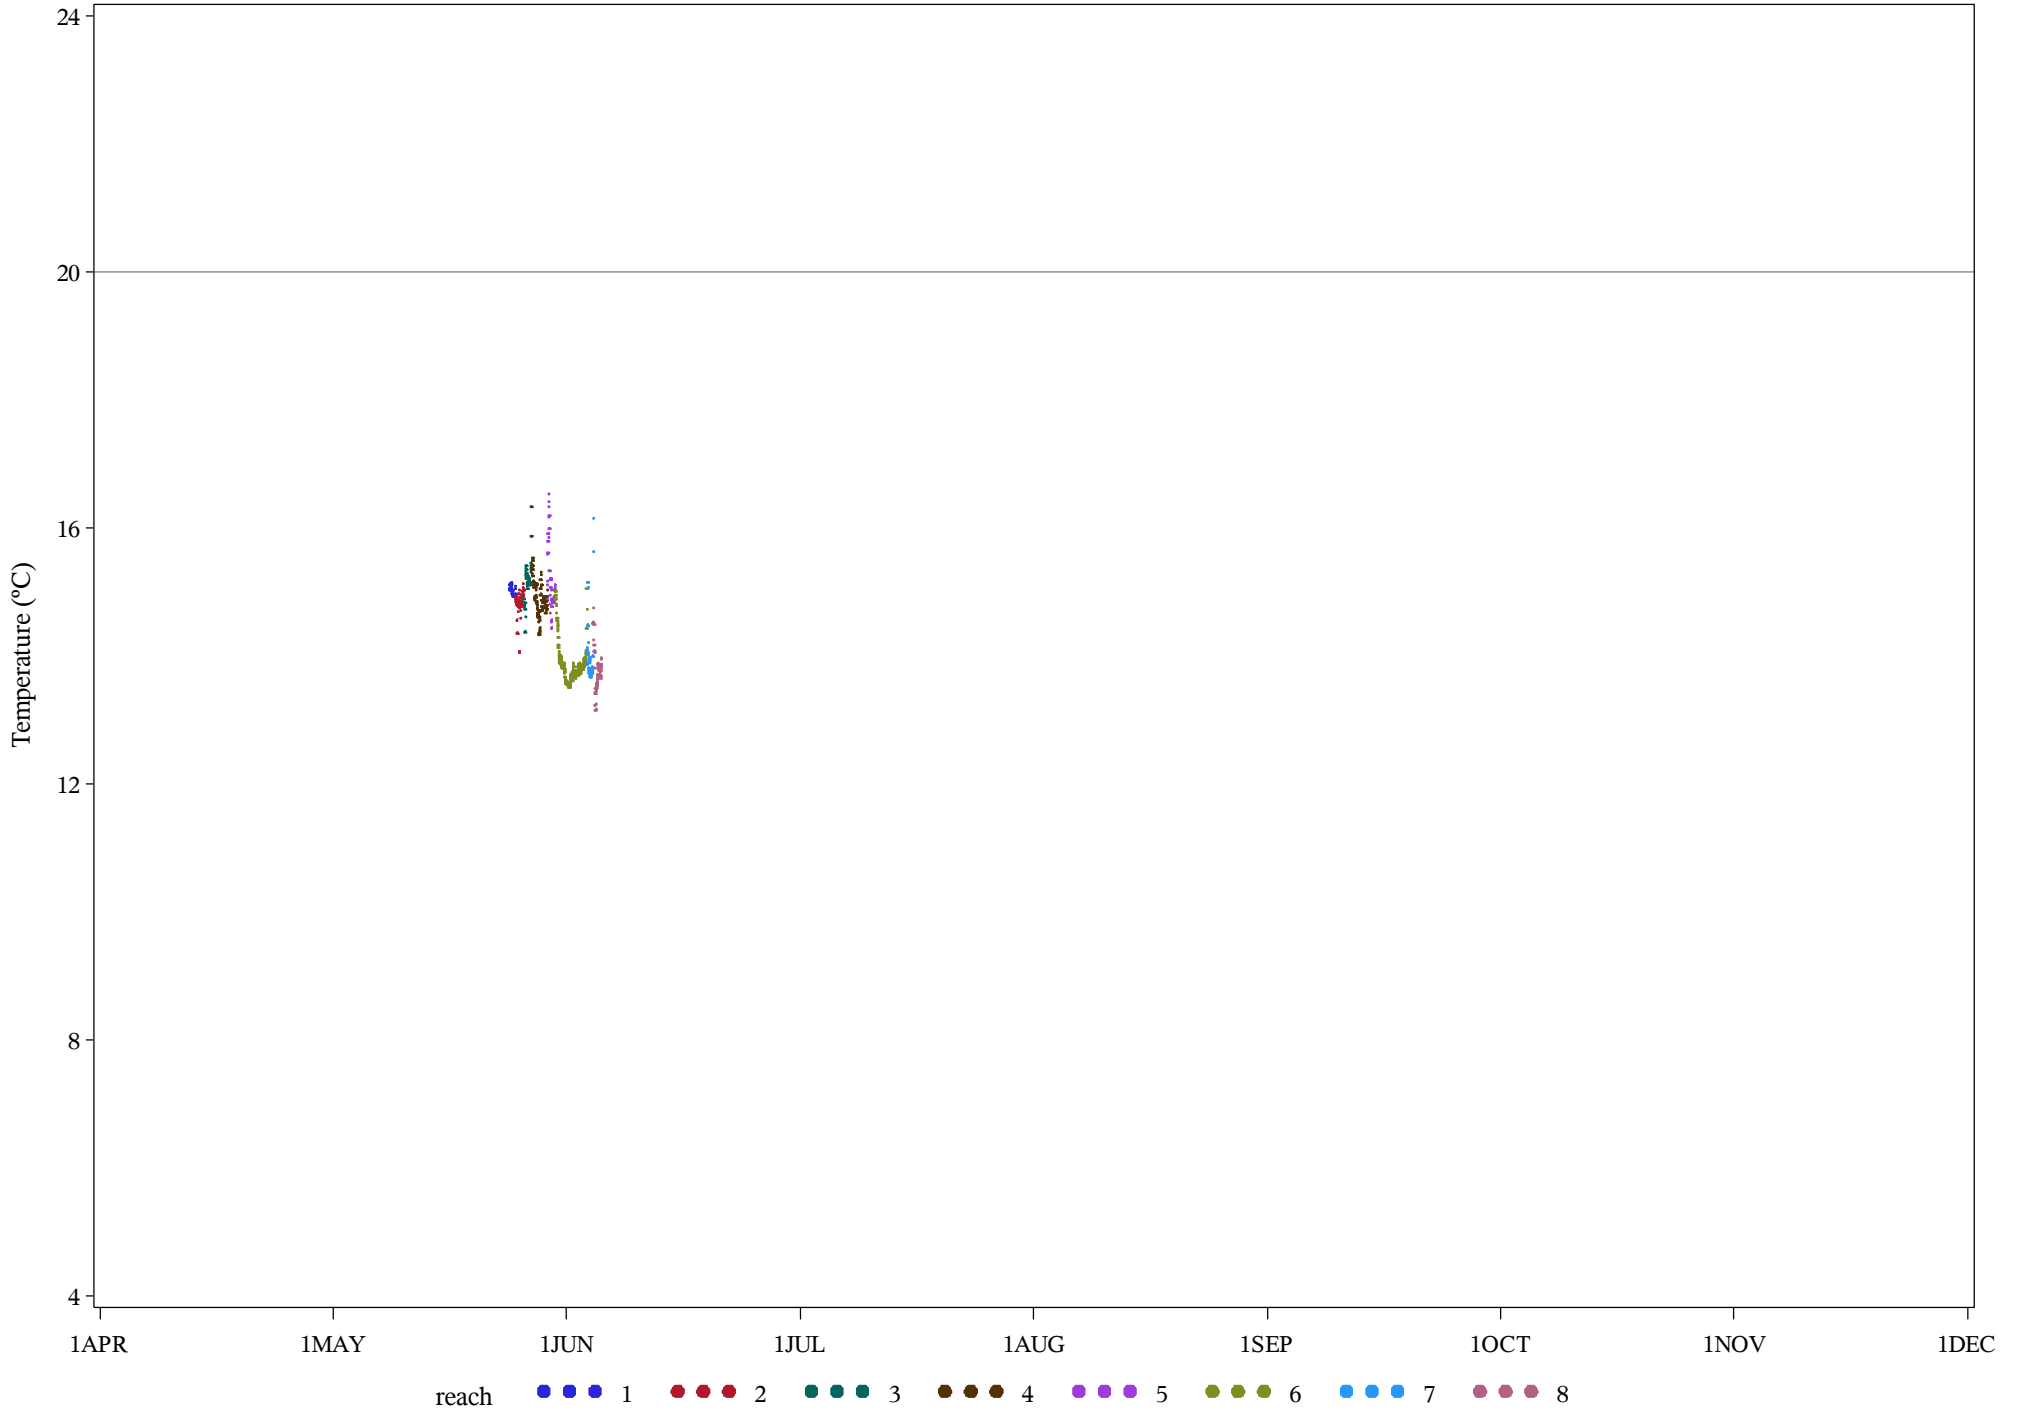



# Spring Chinook 2594A

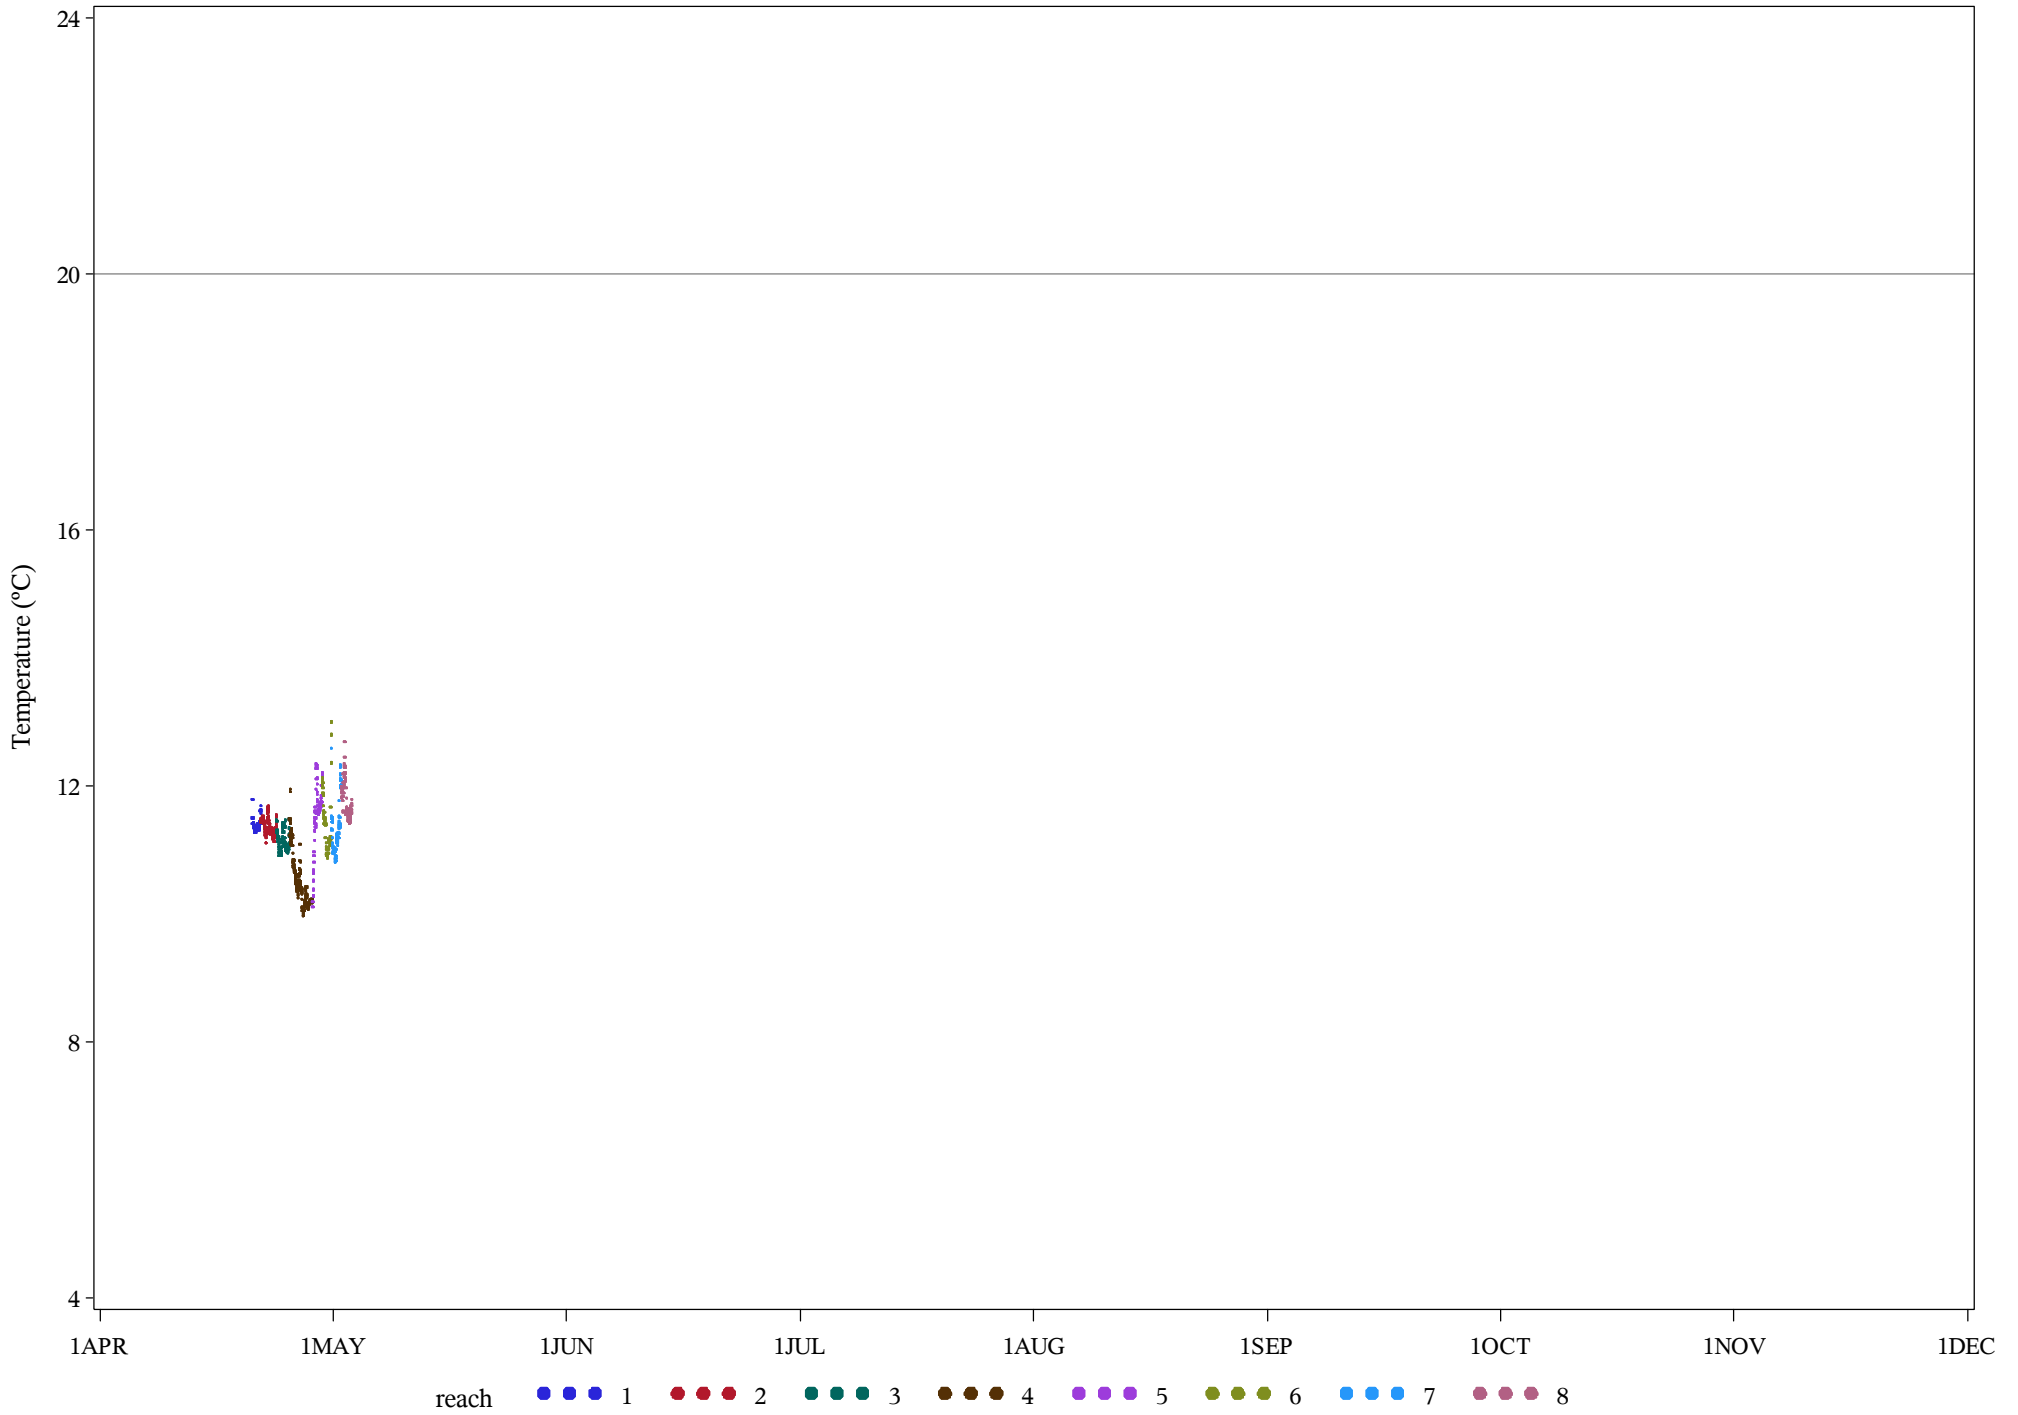



# Spring Chinook 2594B

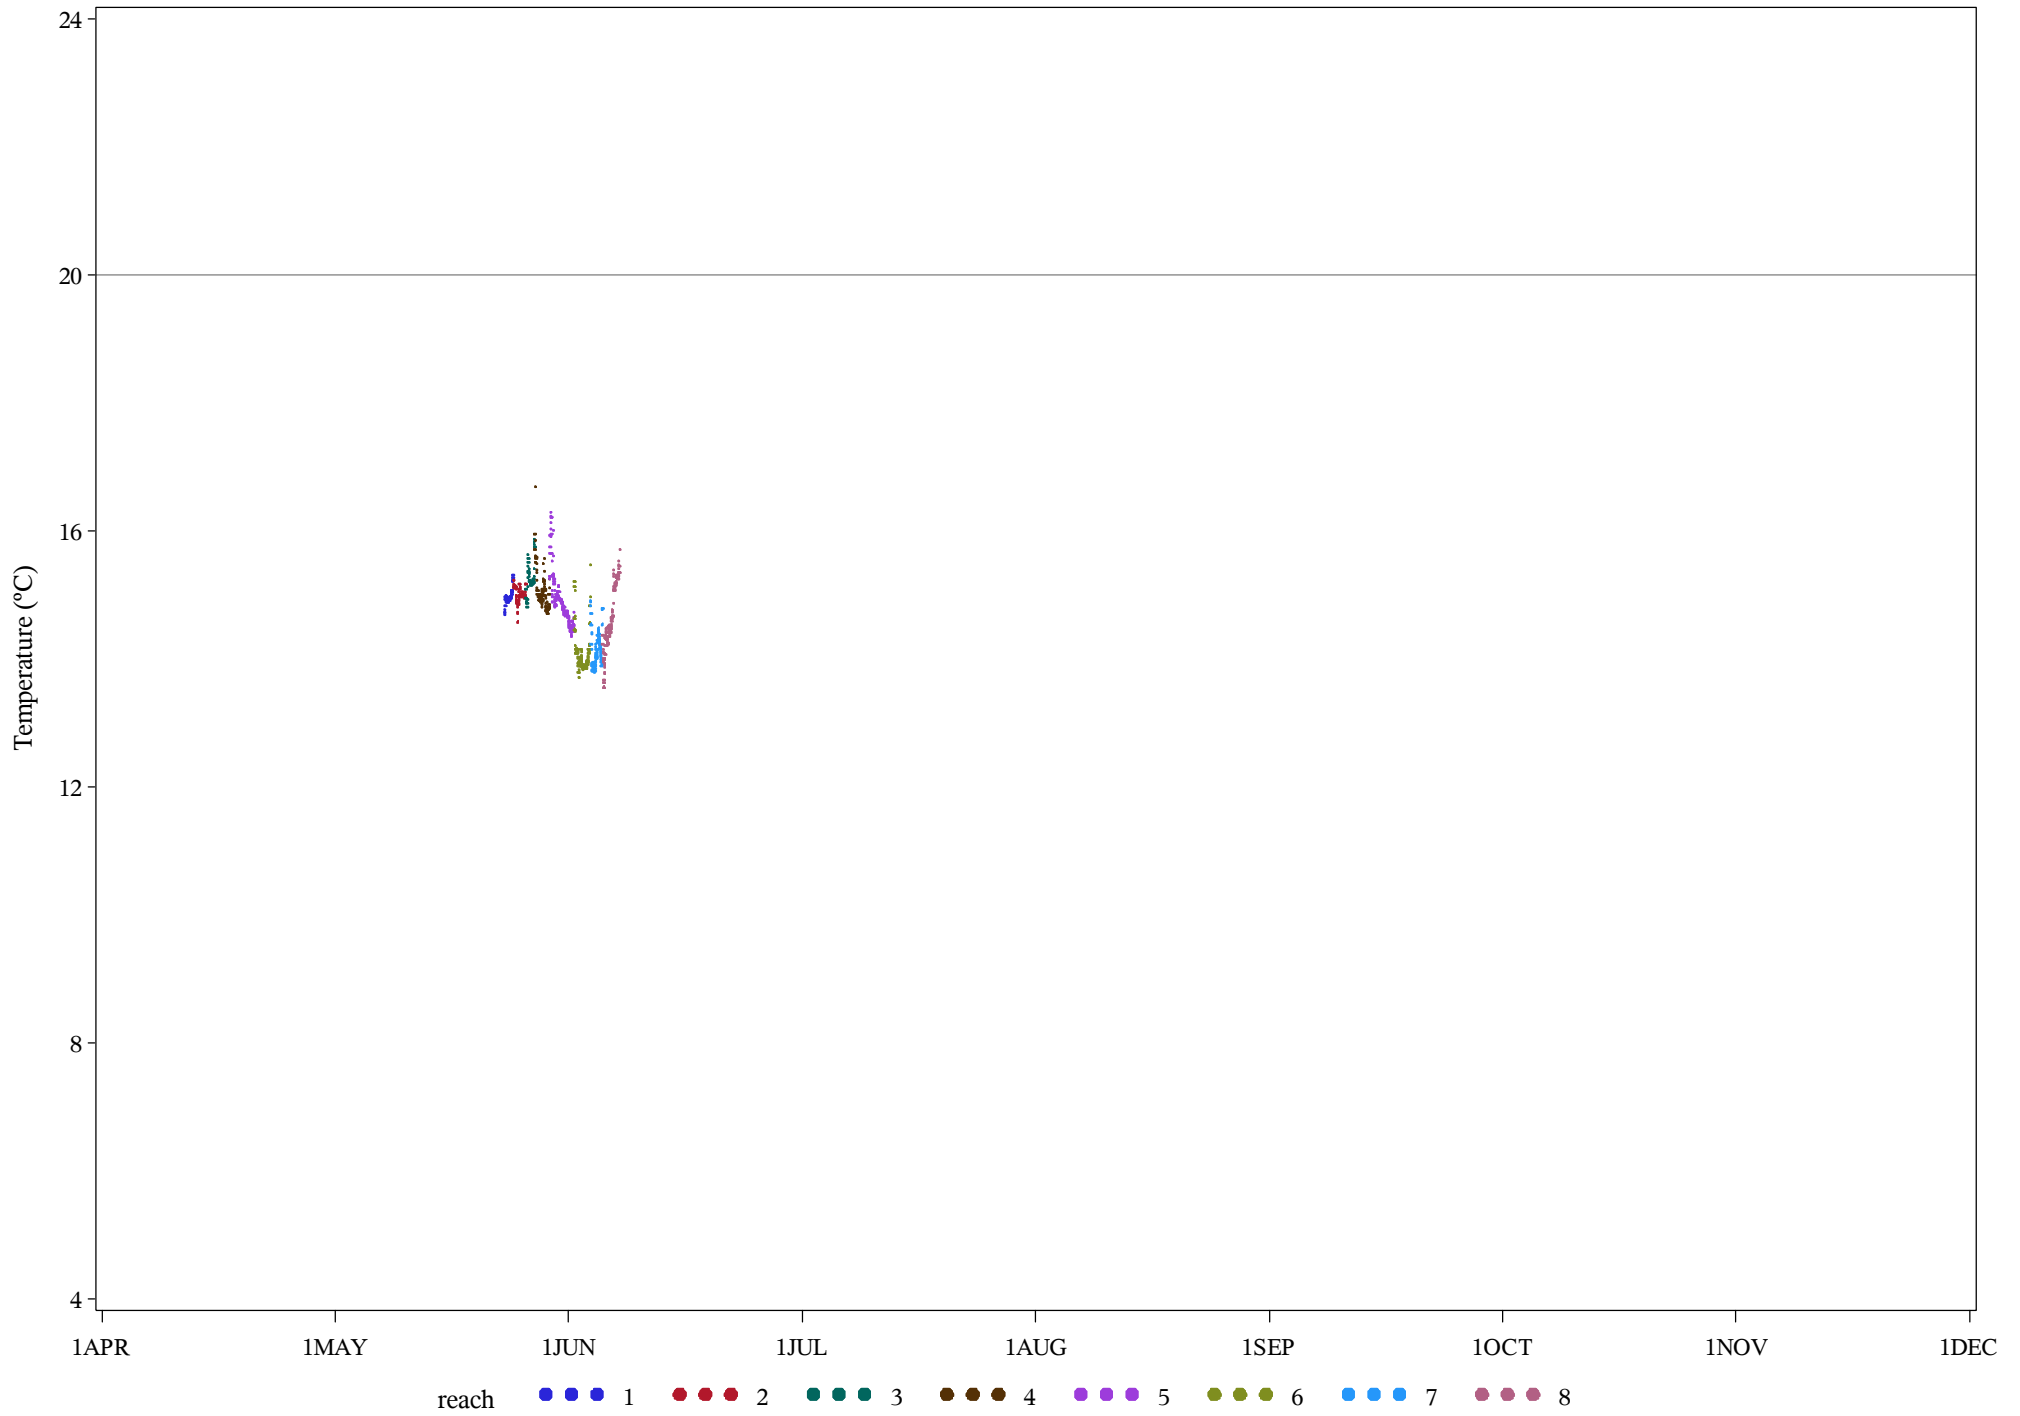

# Spring Chinook 2602A

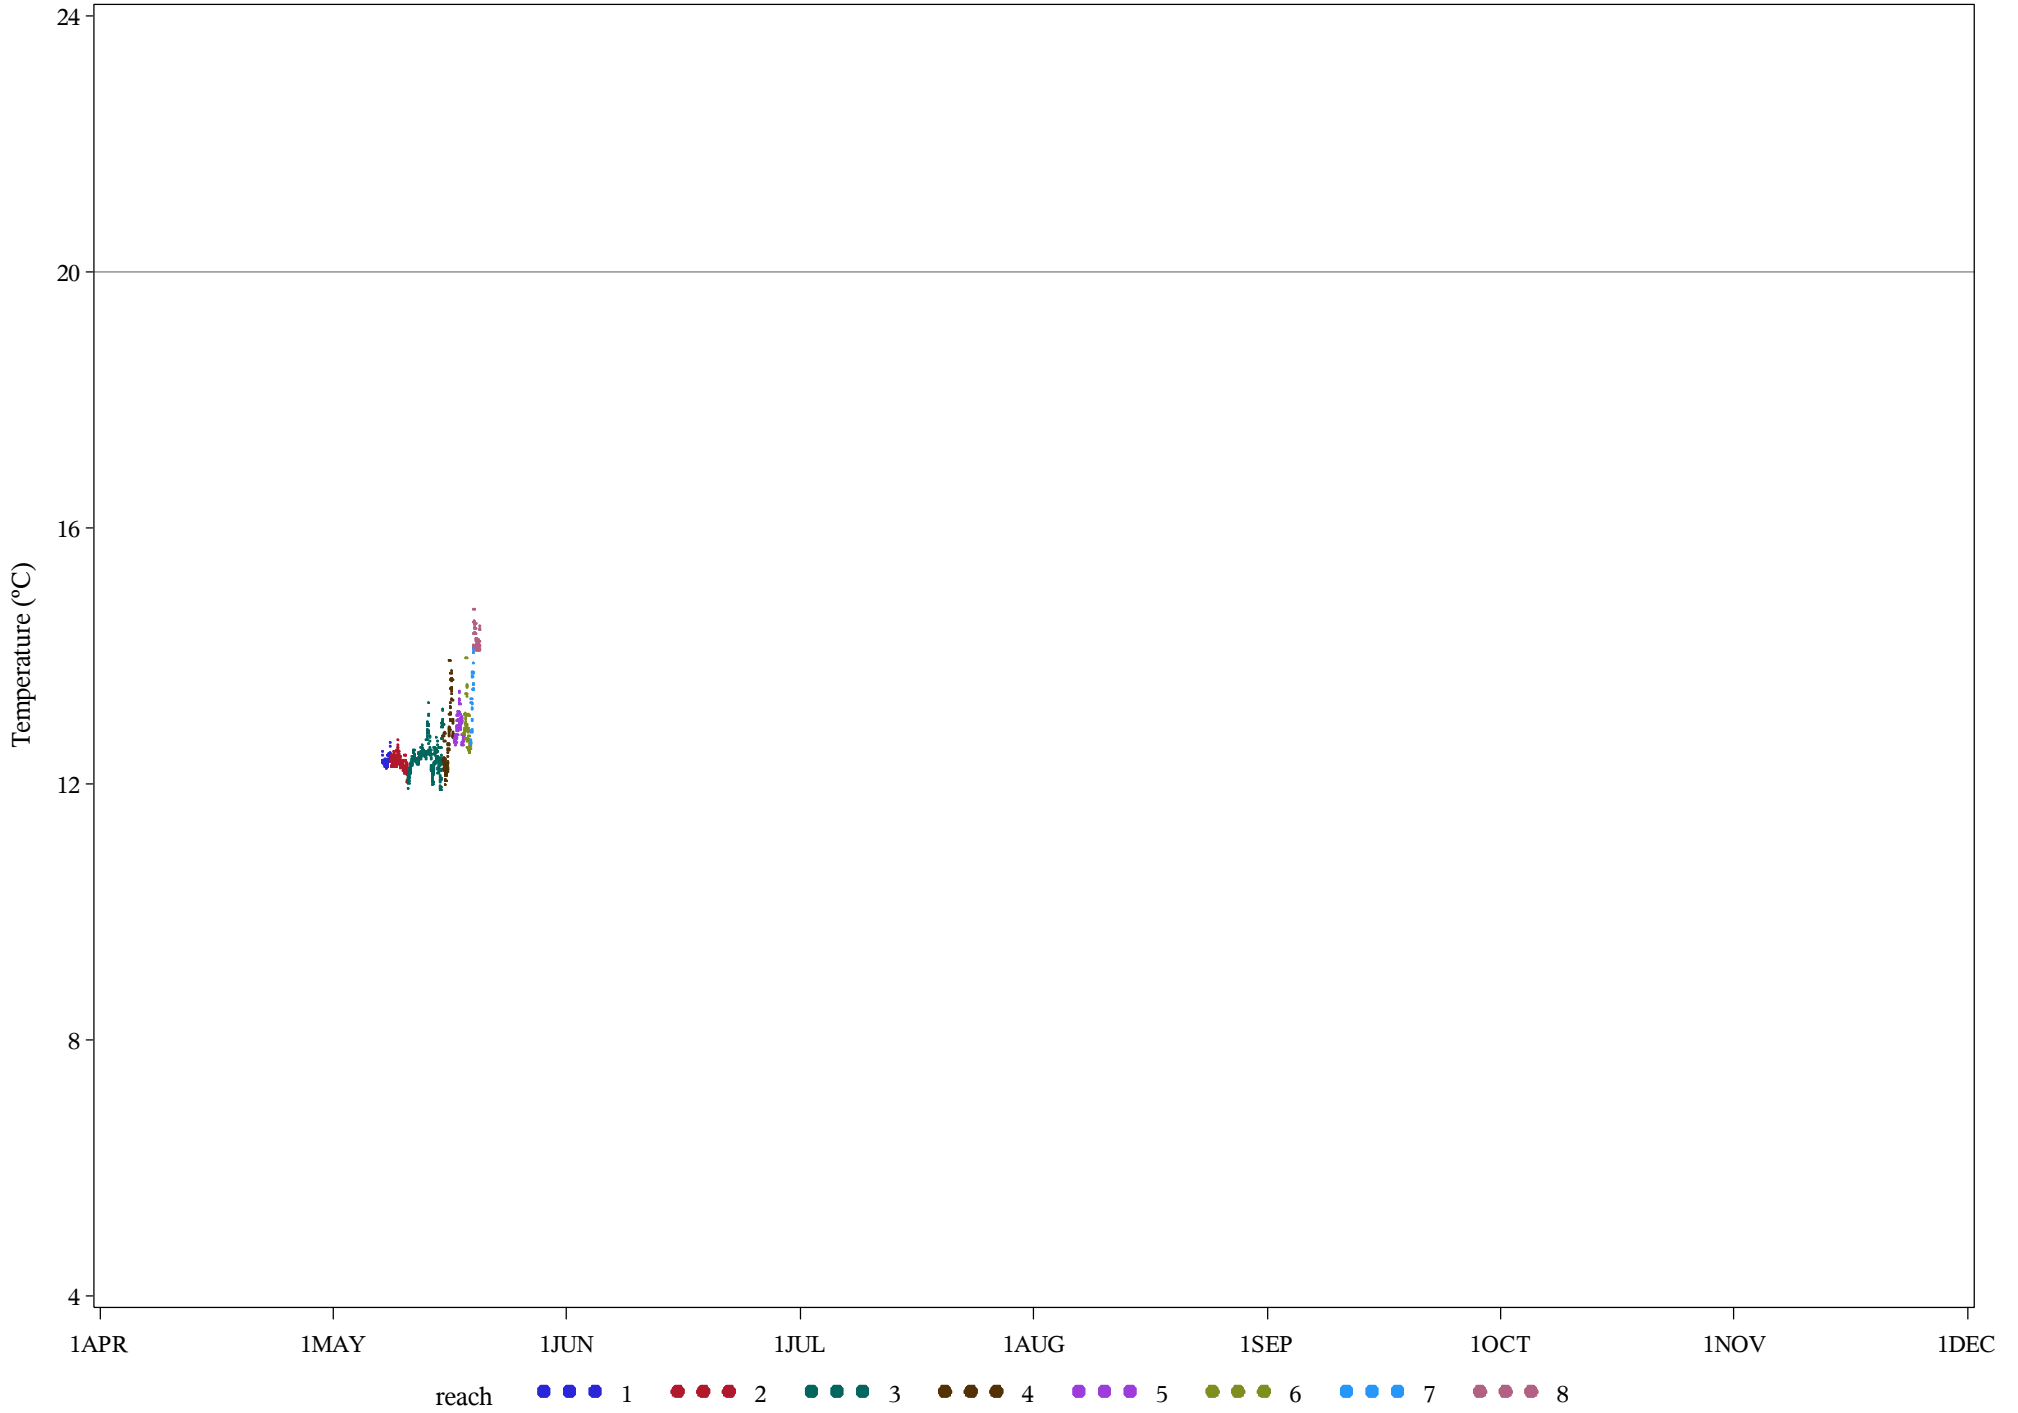

reach    ● ● ● 1    ● ● ● 2    ● ● ● 3    ● ● ● 4    ● ● ● 5    ● ● ● 6    ● ● ● 7    ● ● ● 8

# Spring Chinook 2619A

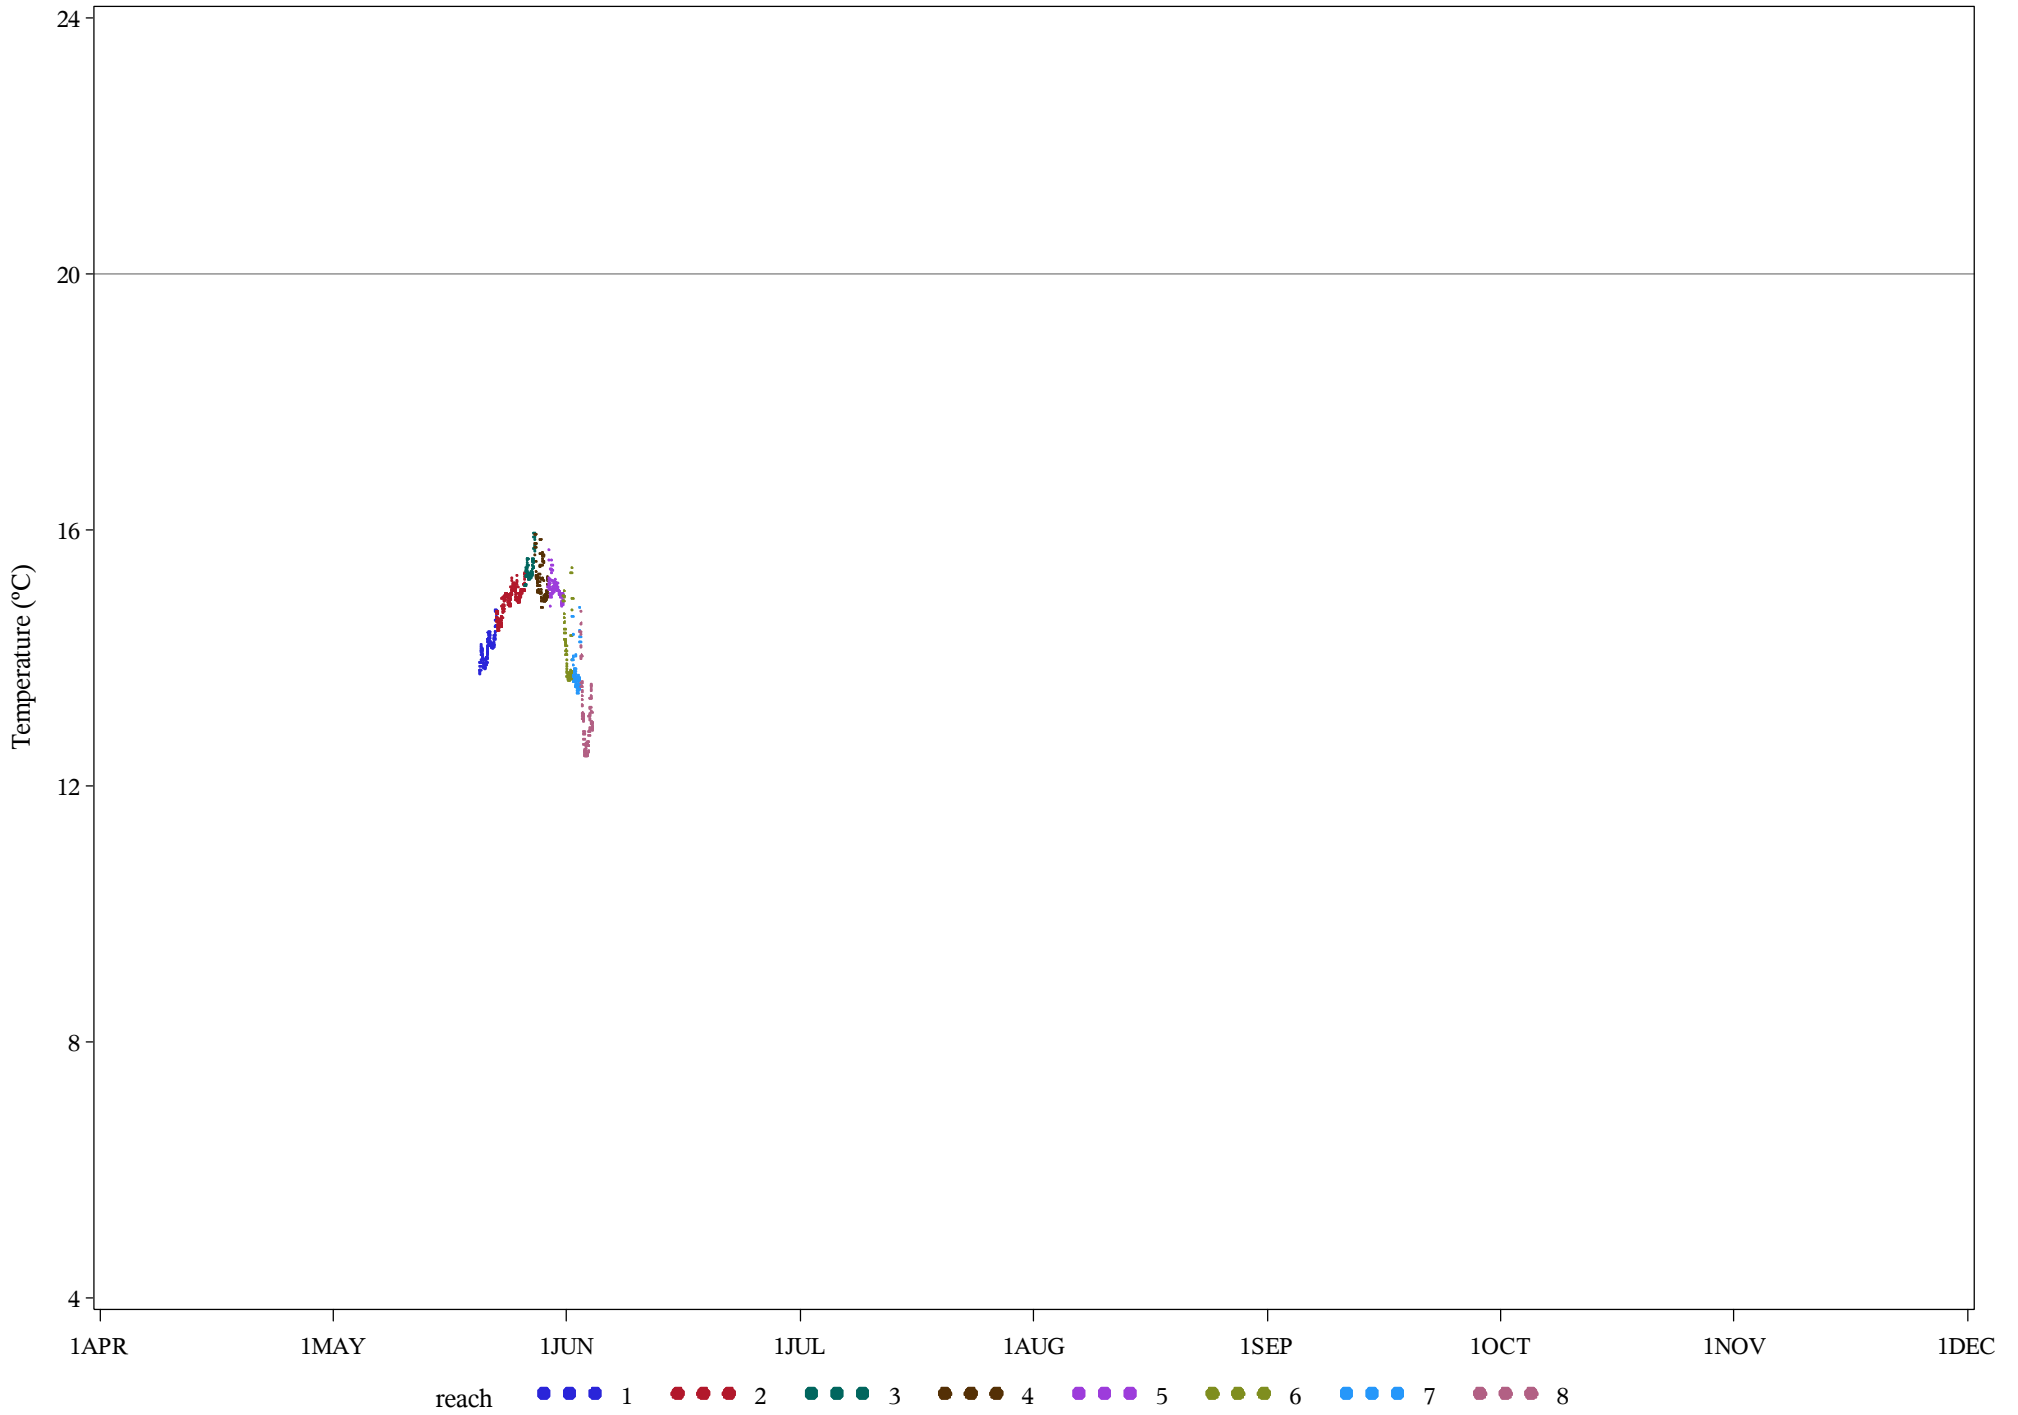

# Spring Chinook 2621A

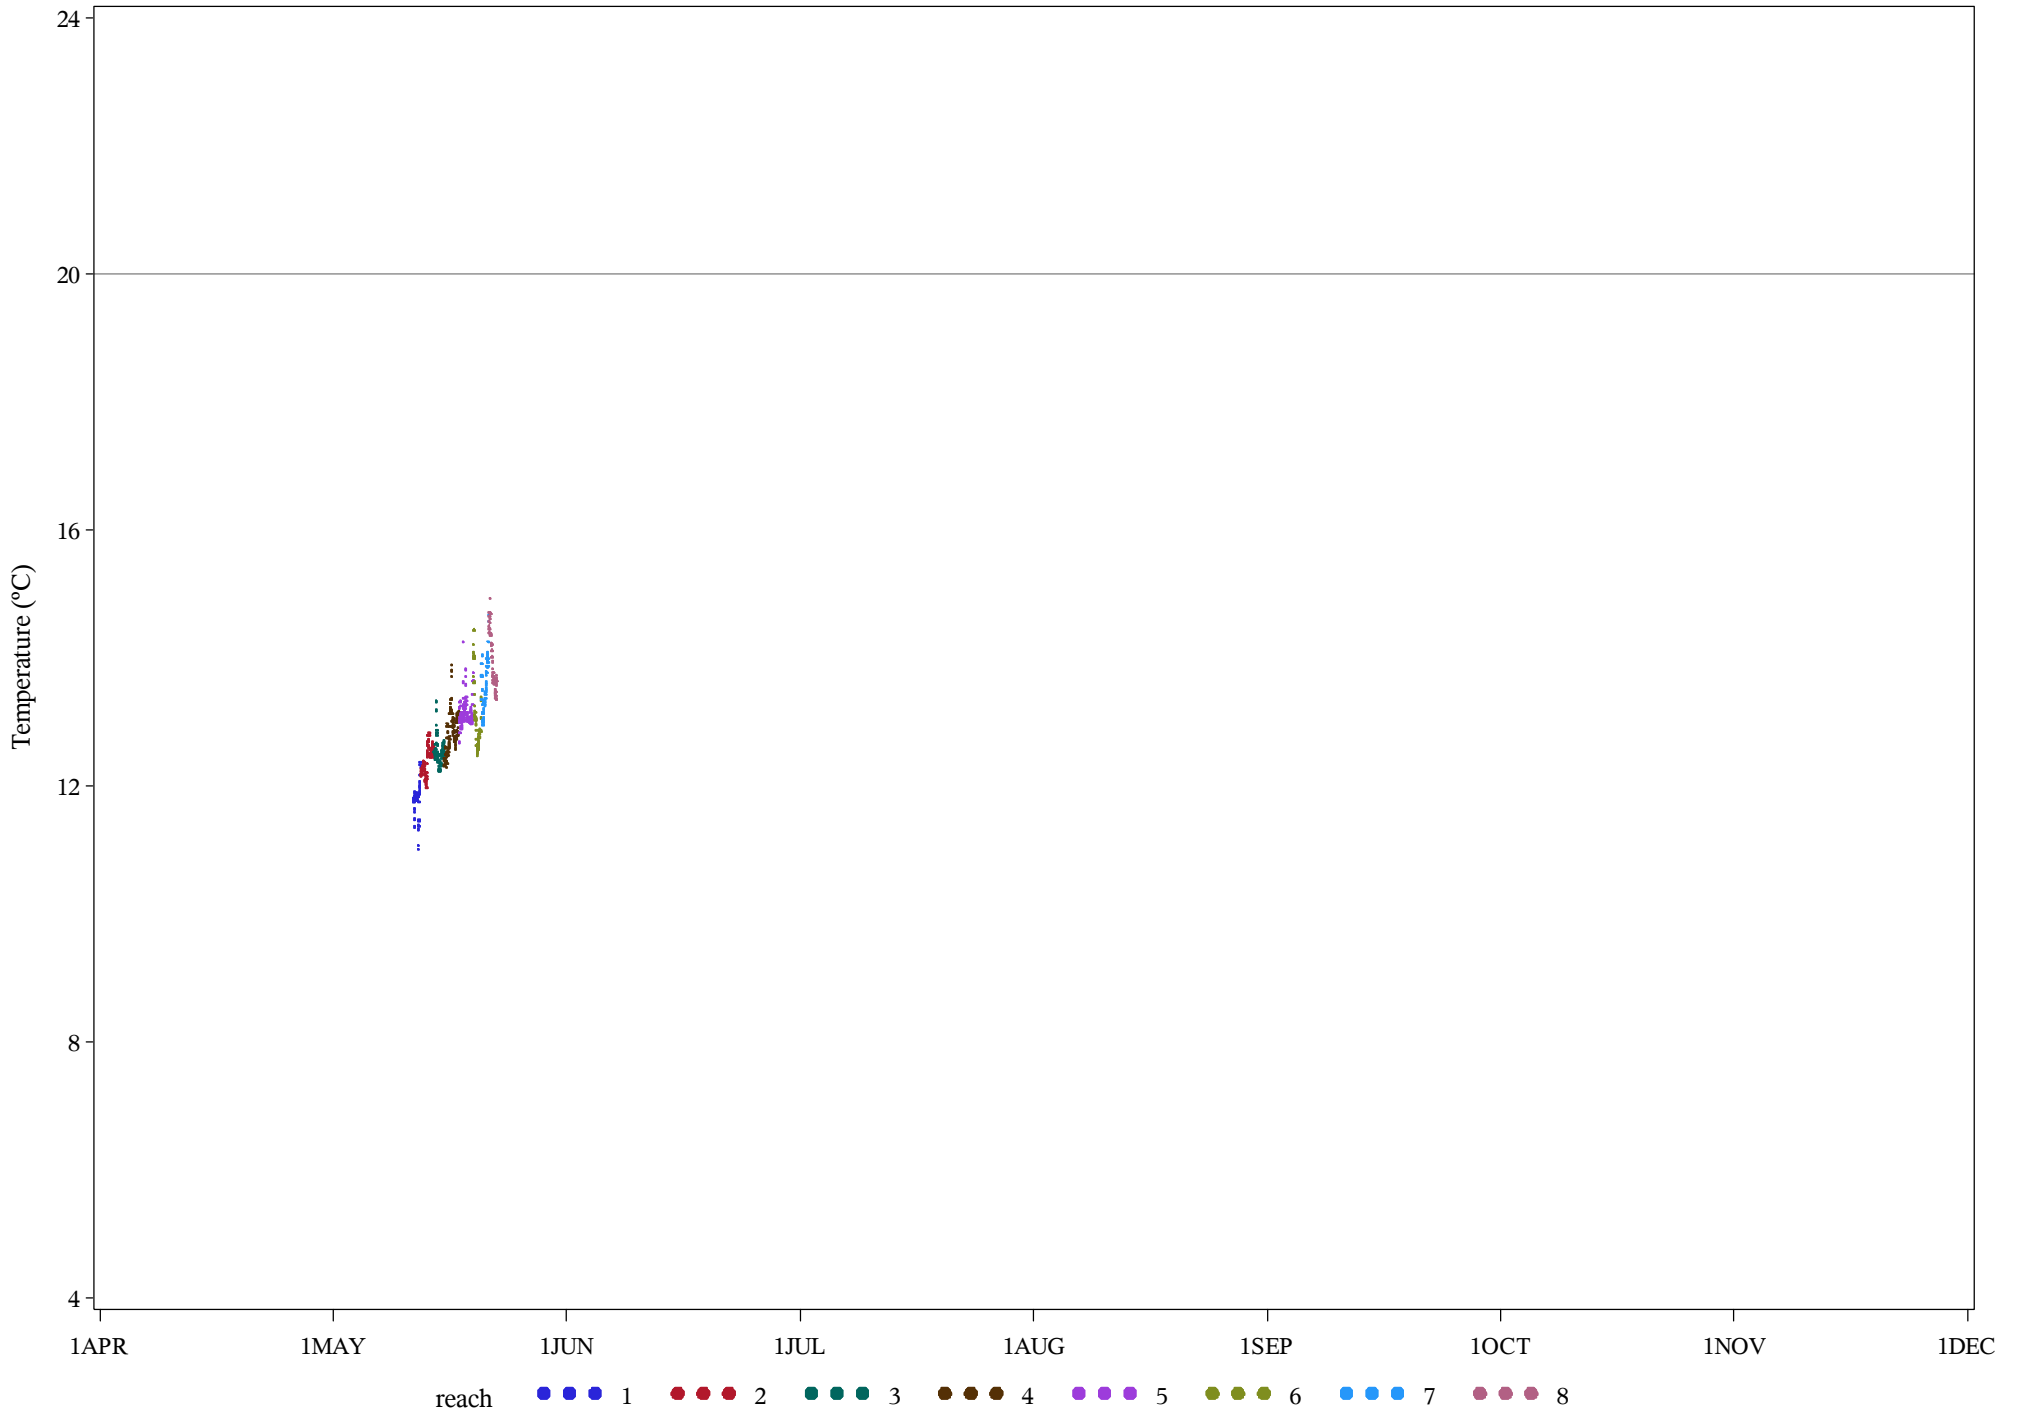

# Spring Chinook 2623A

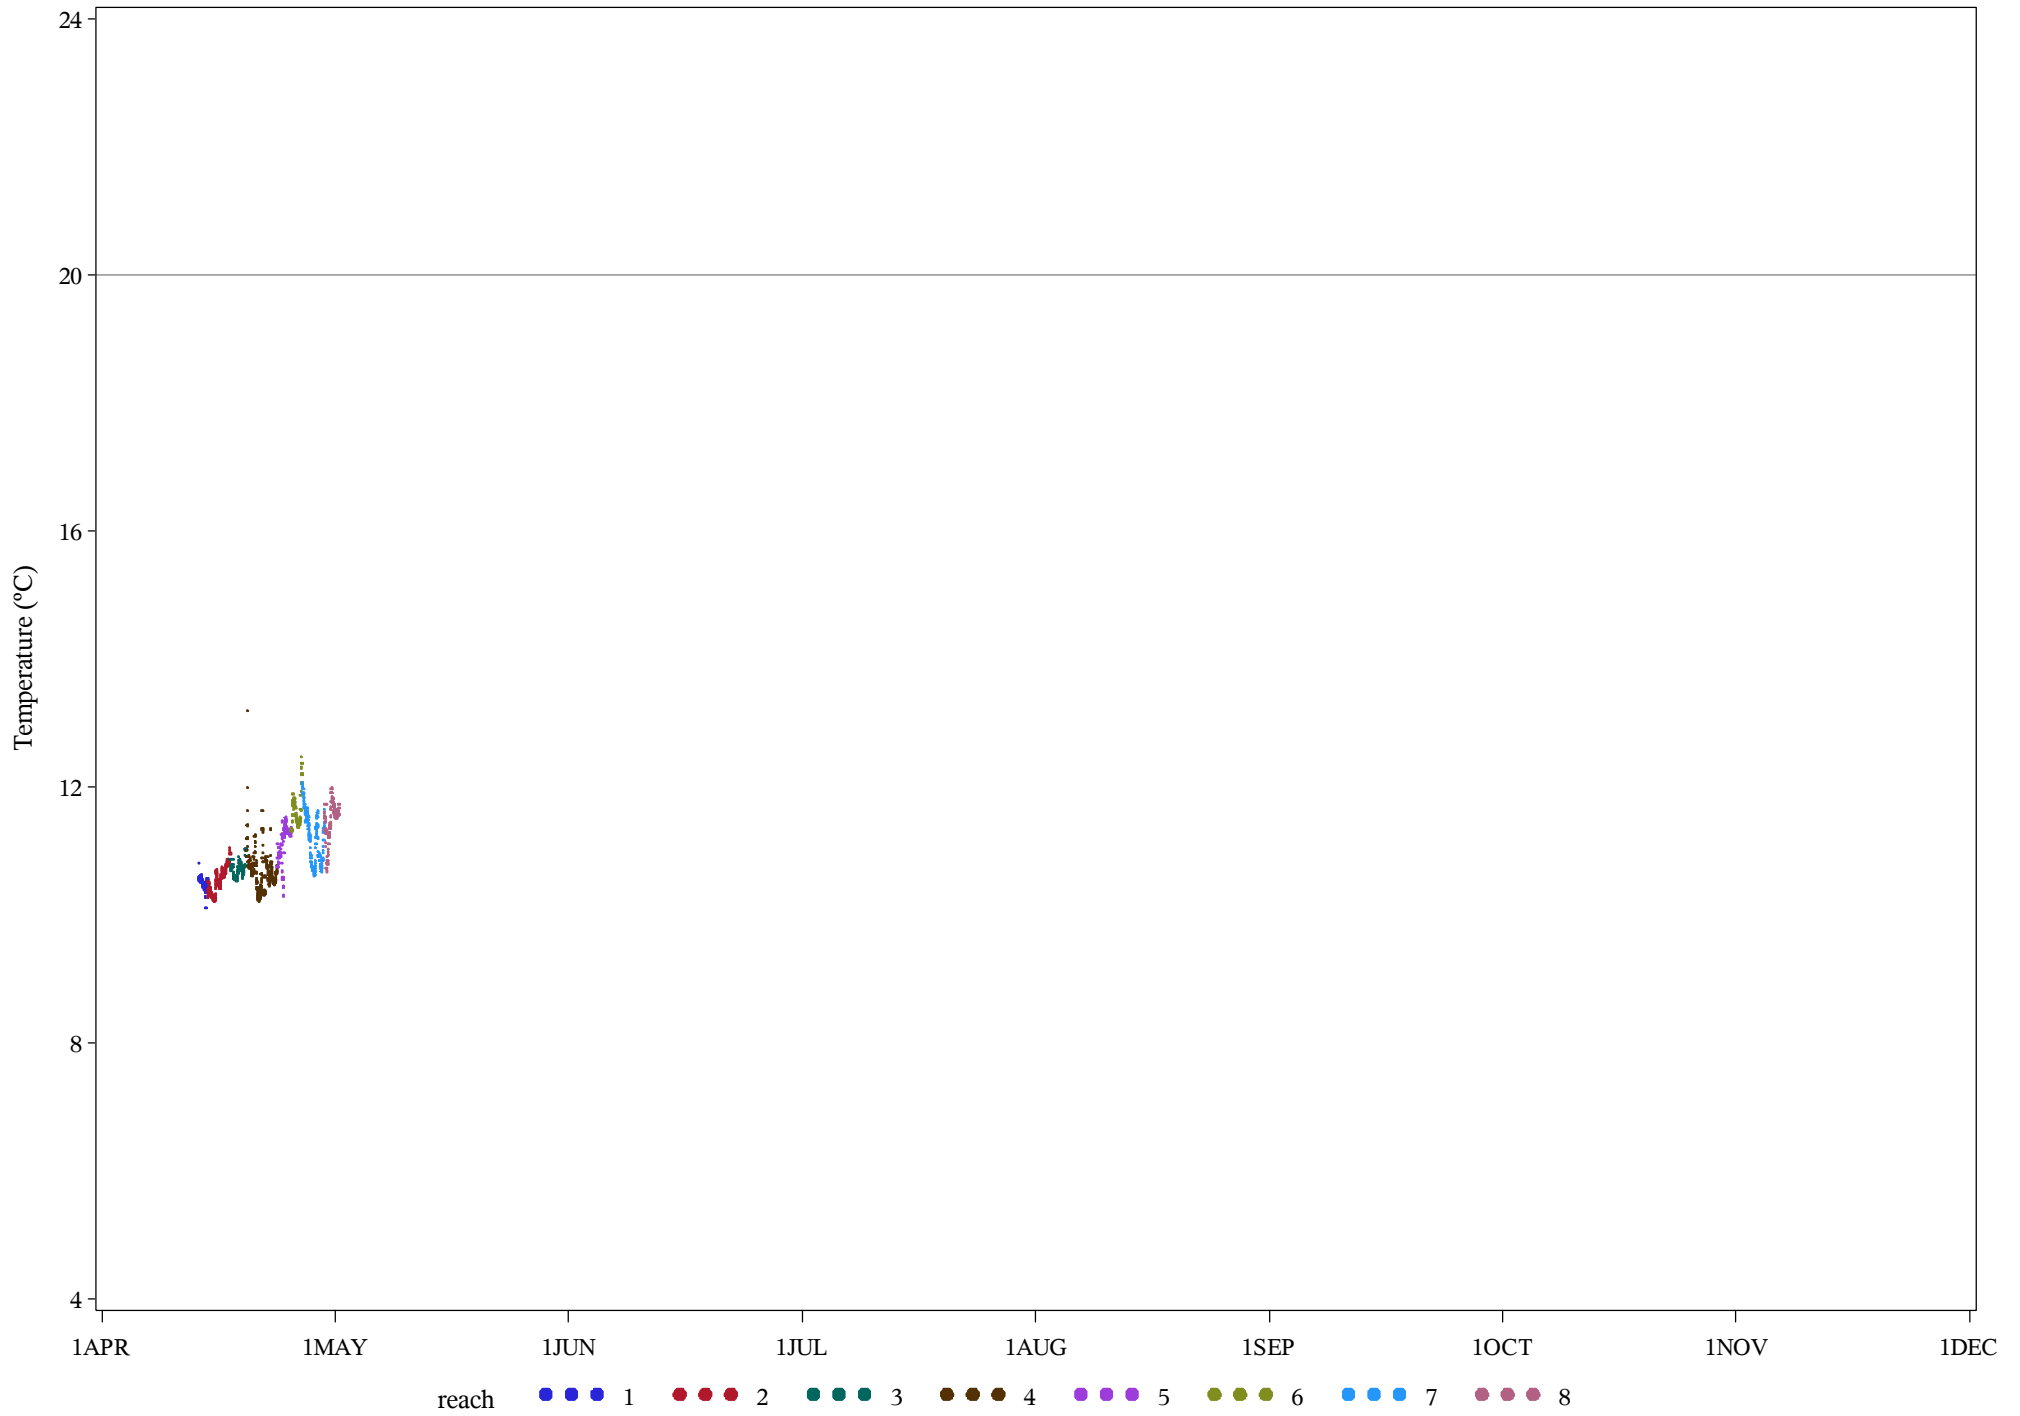

# Spring Chinook 2635A

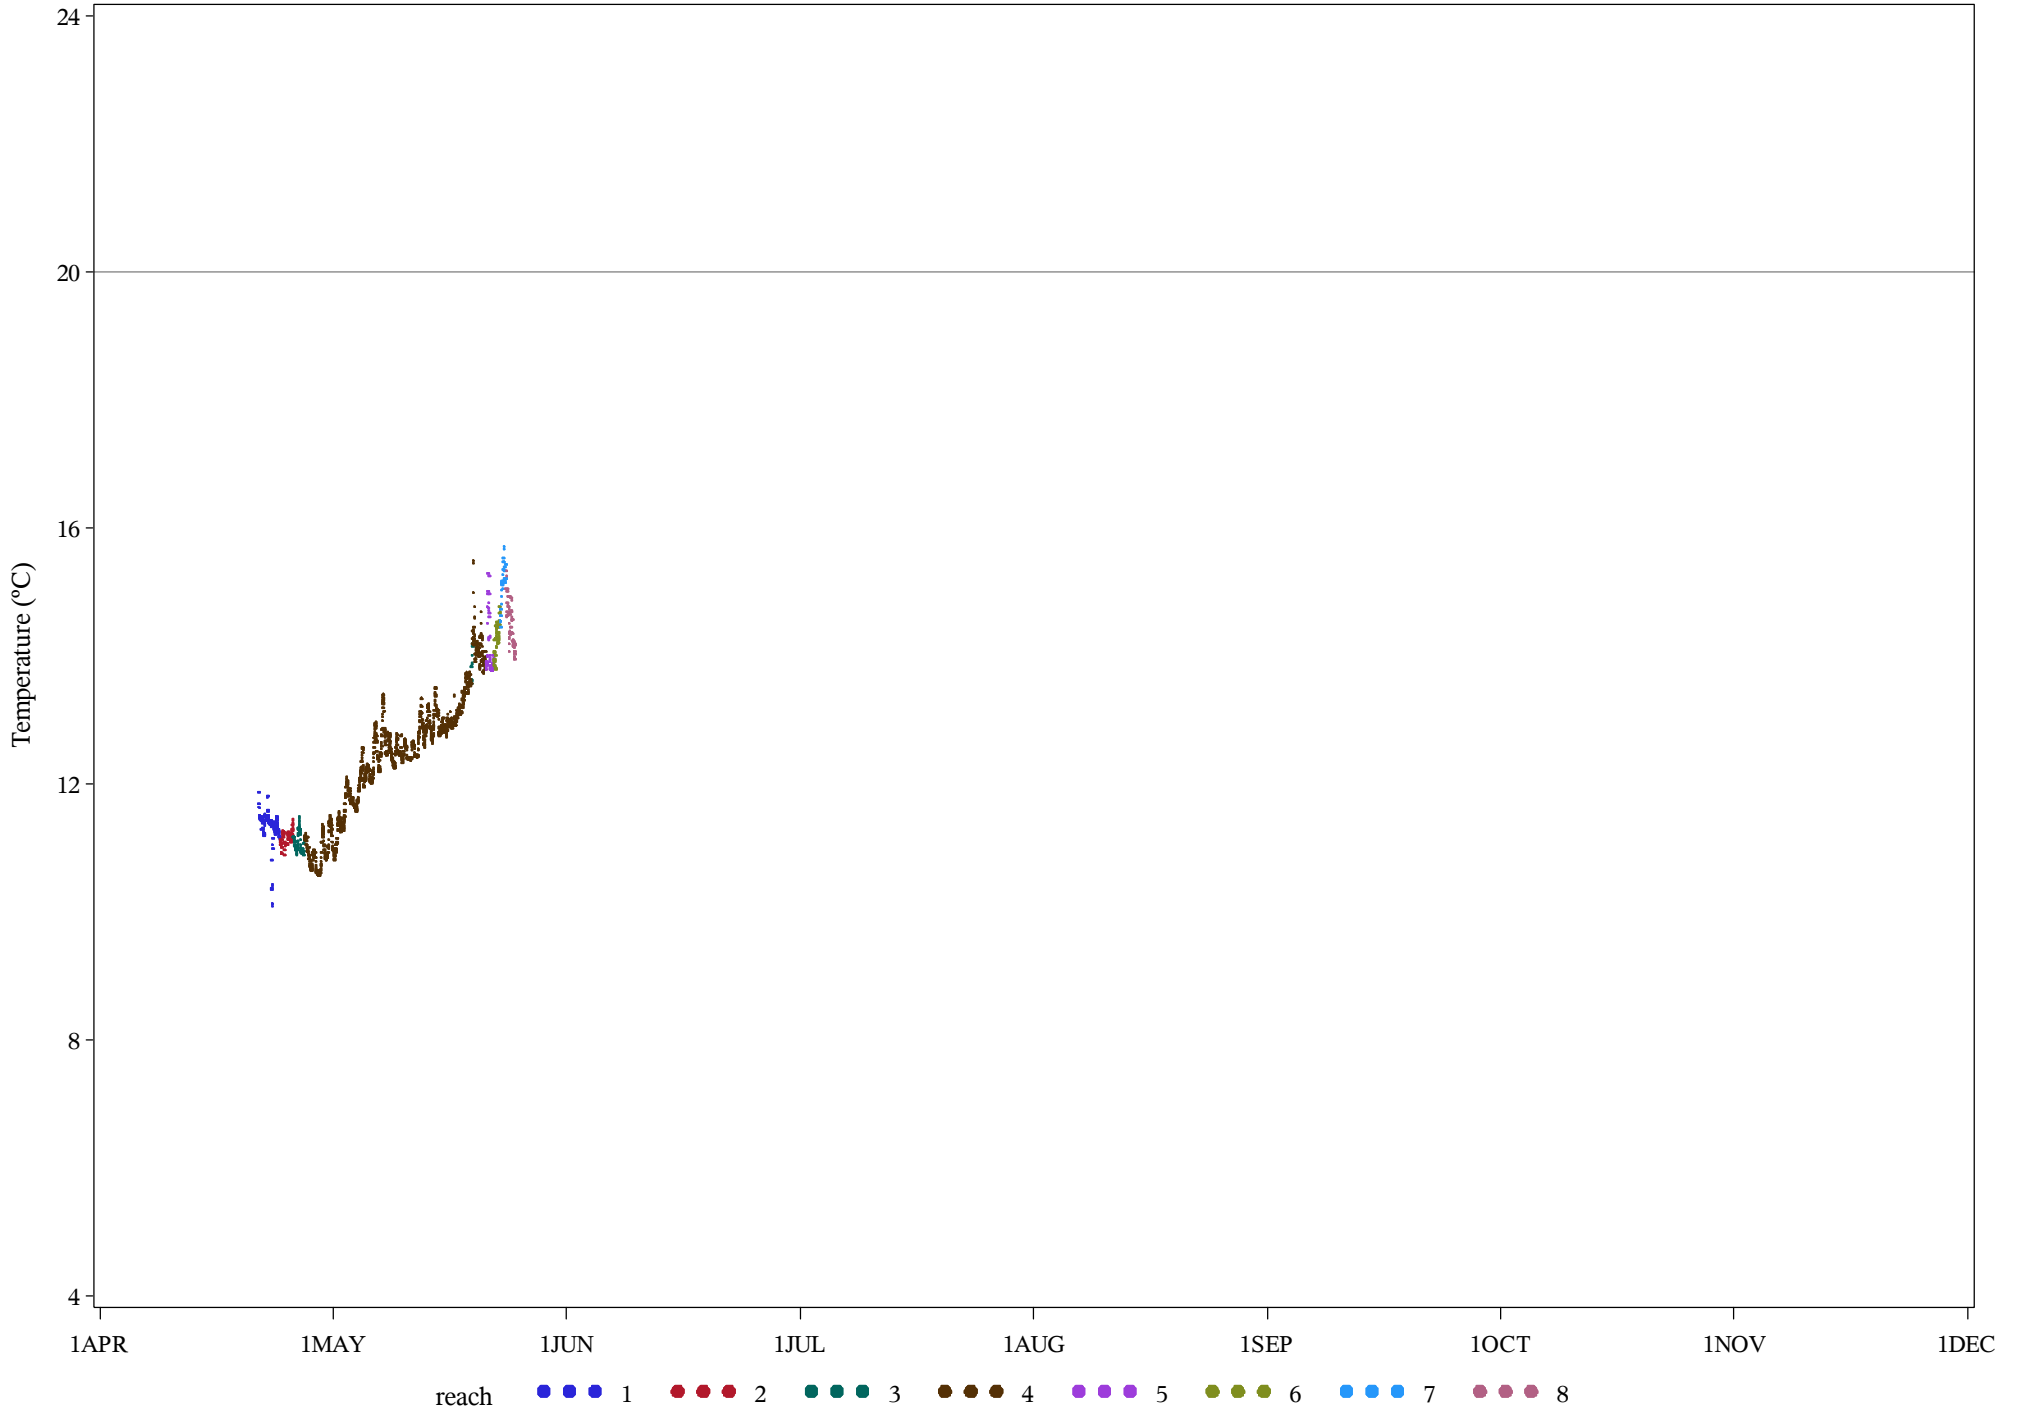

# Spring Chinook 2648A

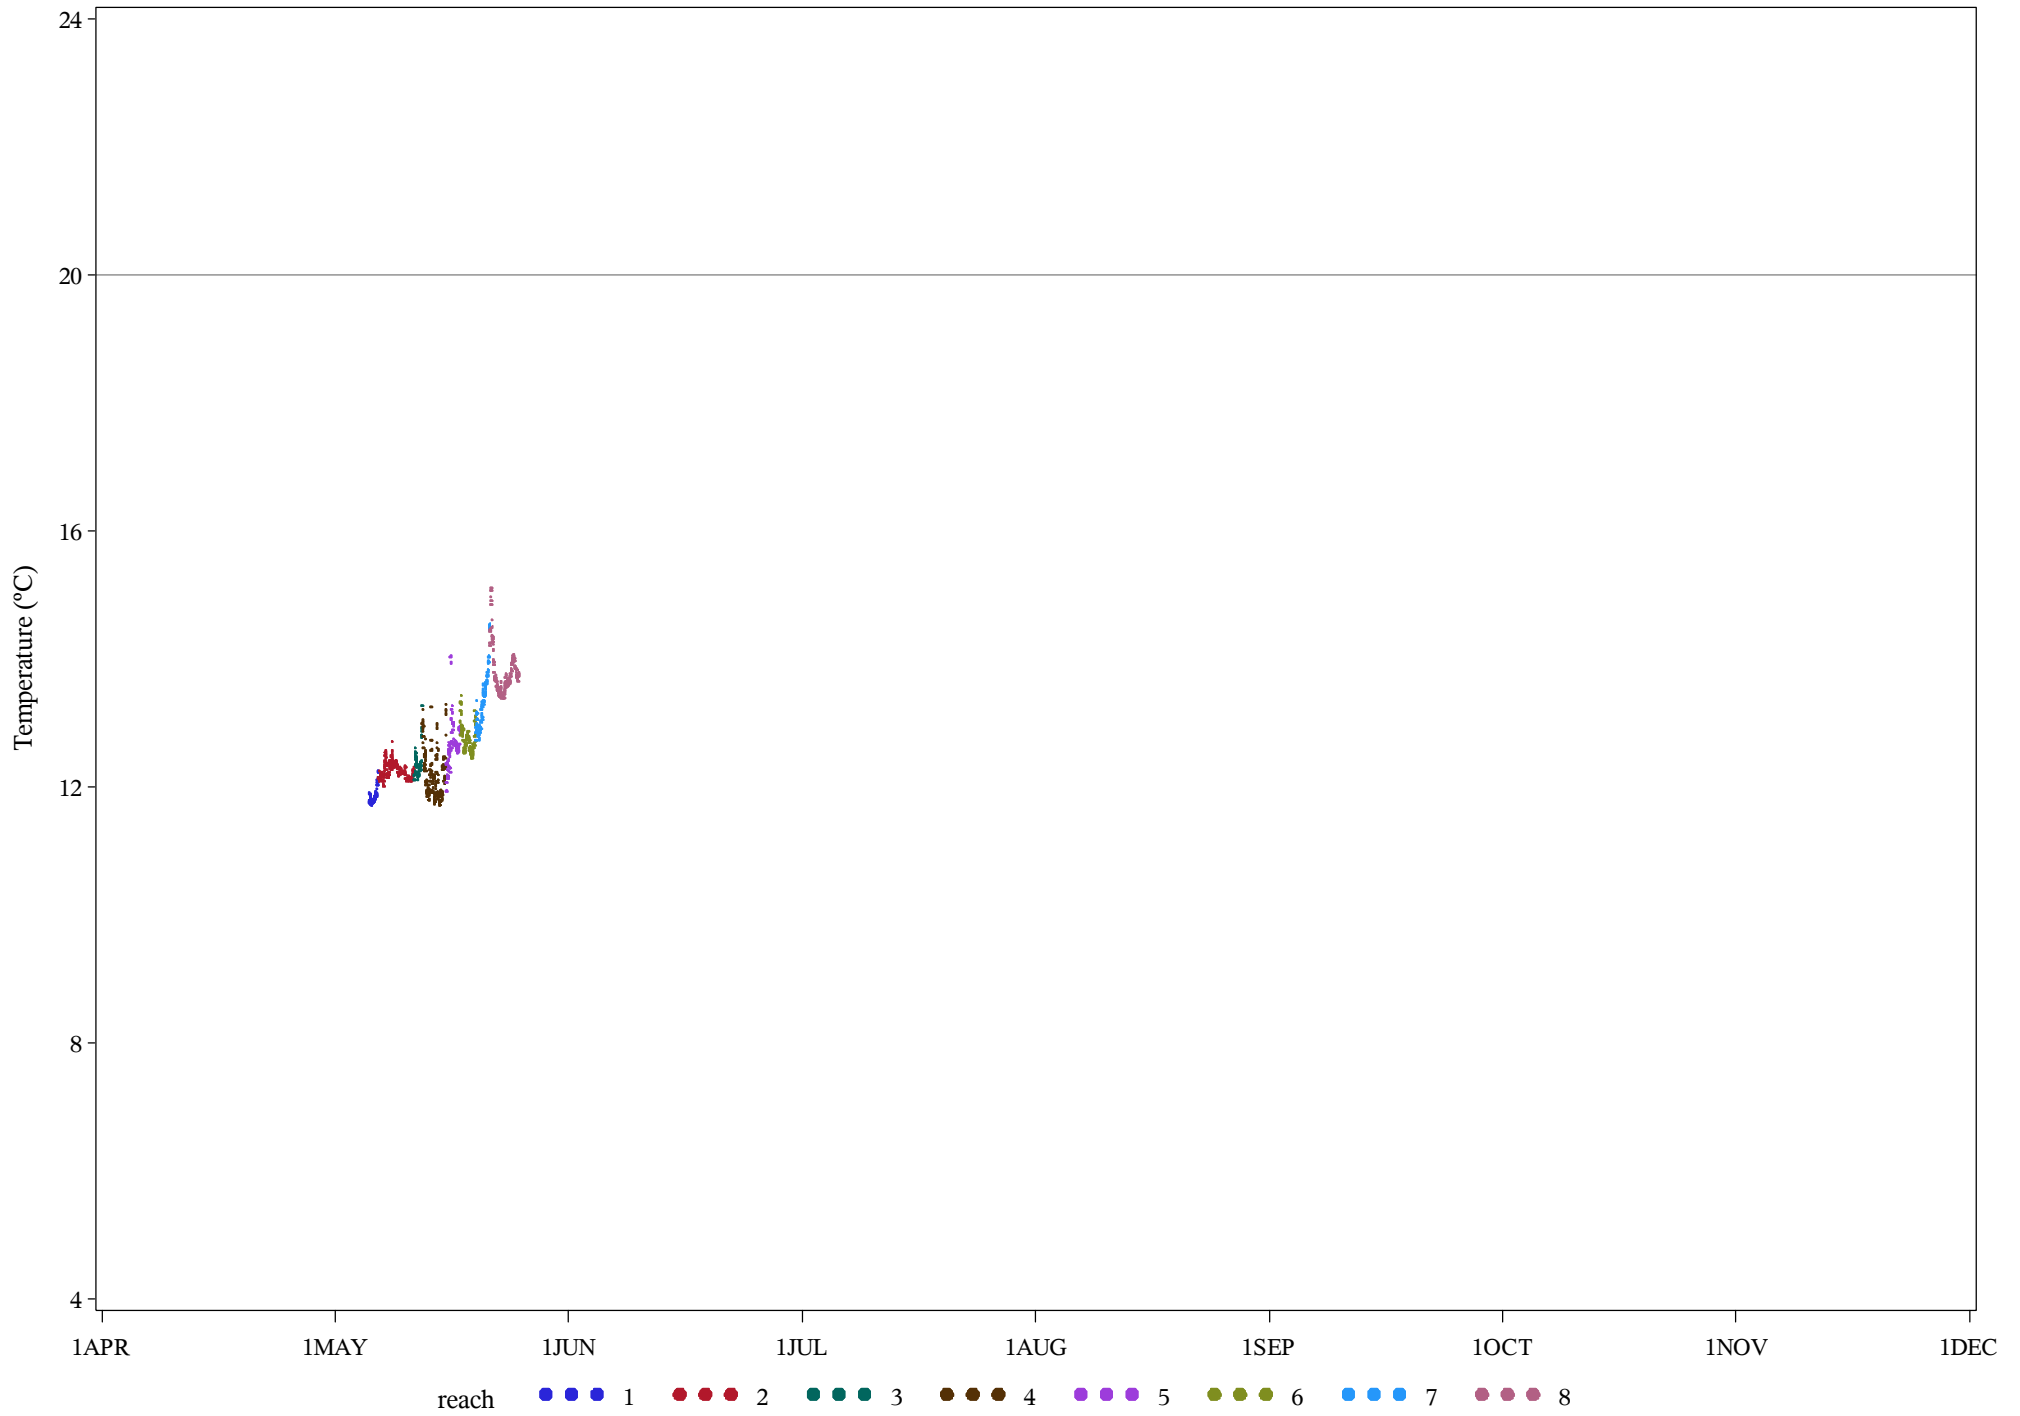

# Spring Chinook 2650A

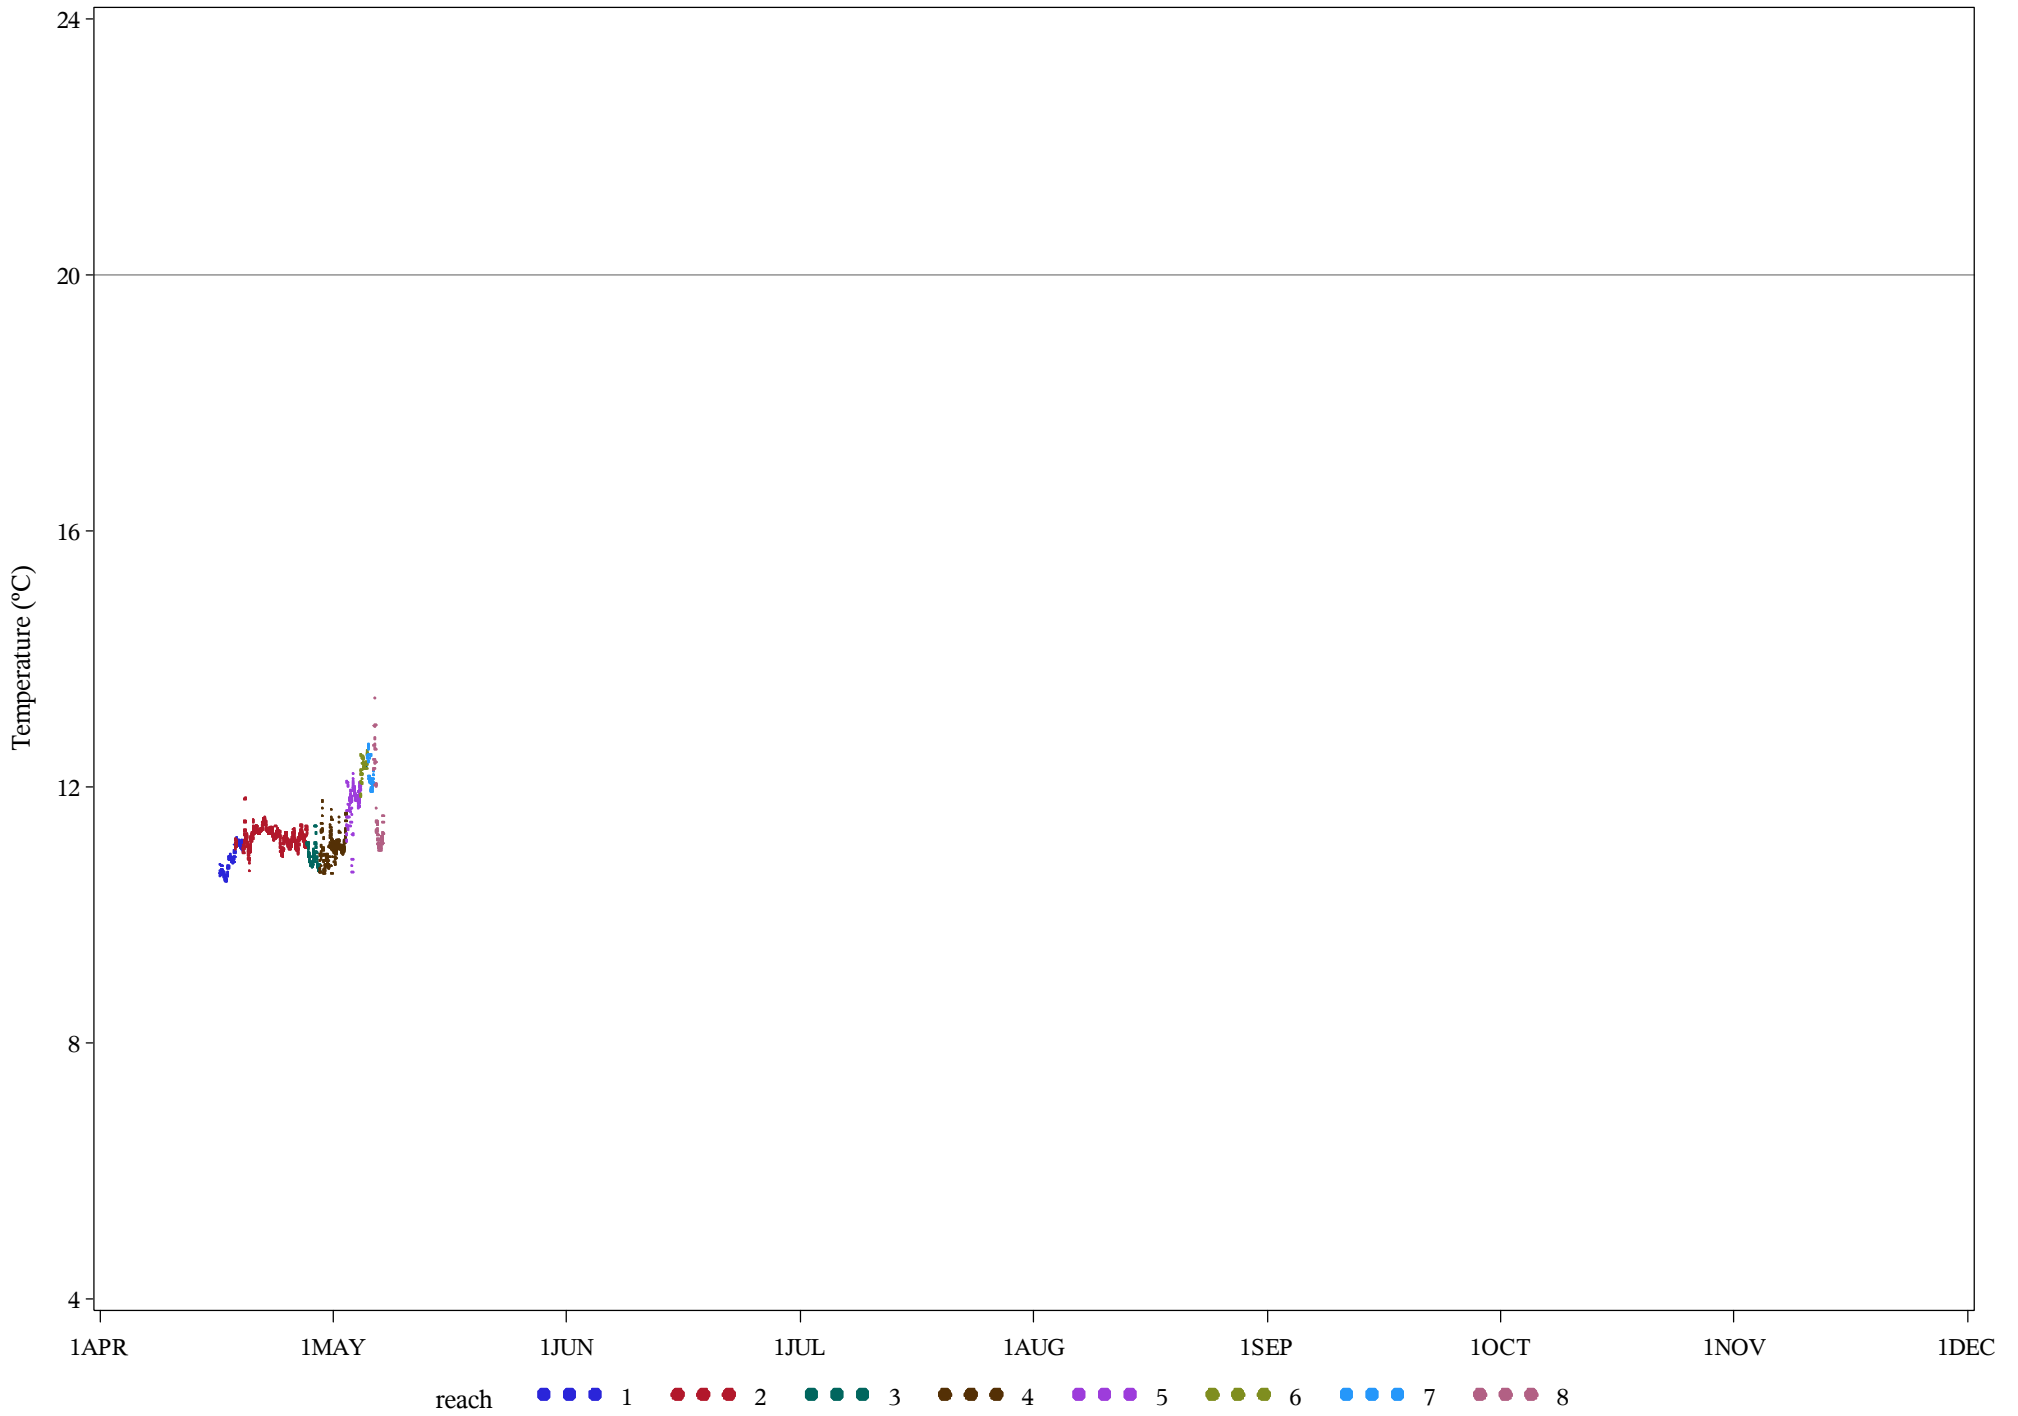



# Spring Chinook 2666A

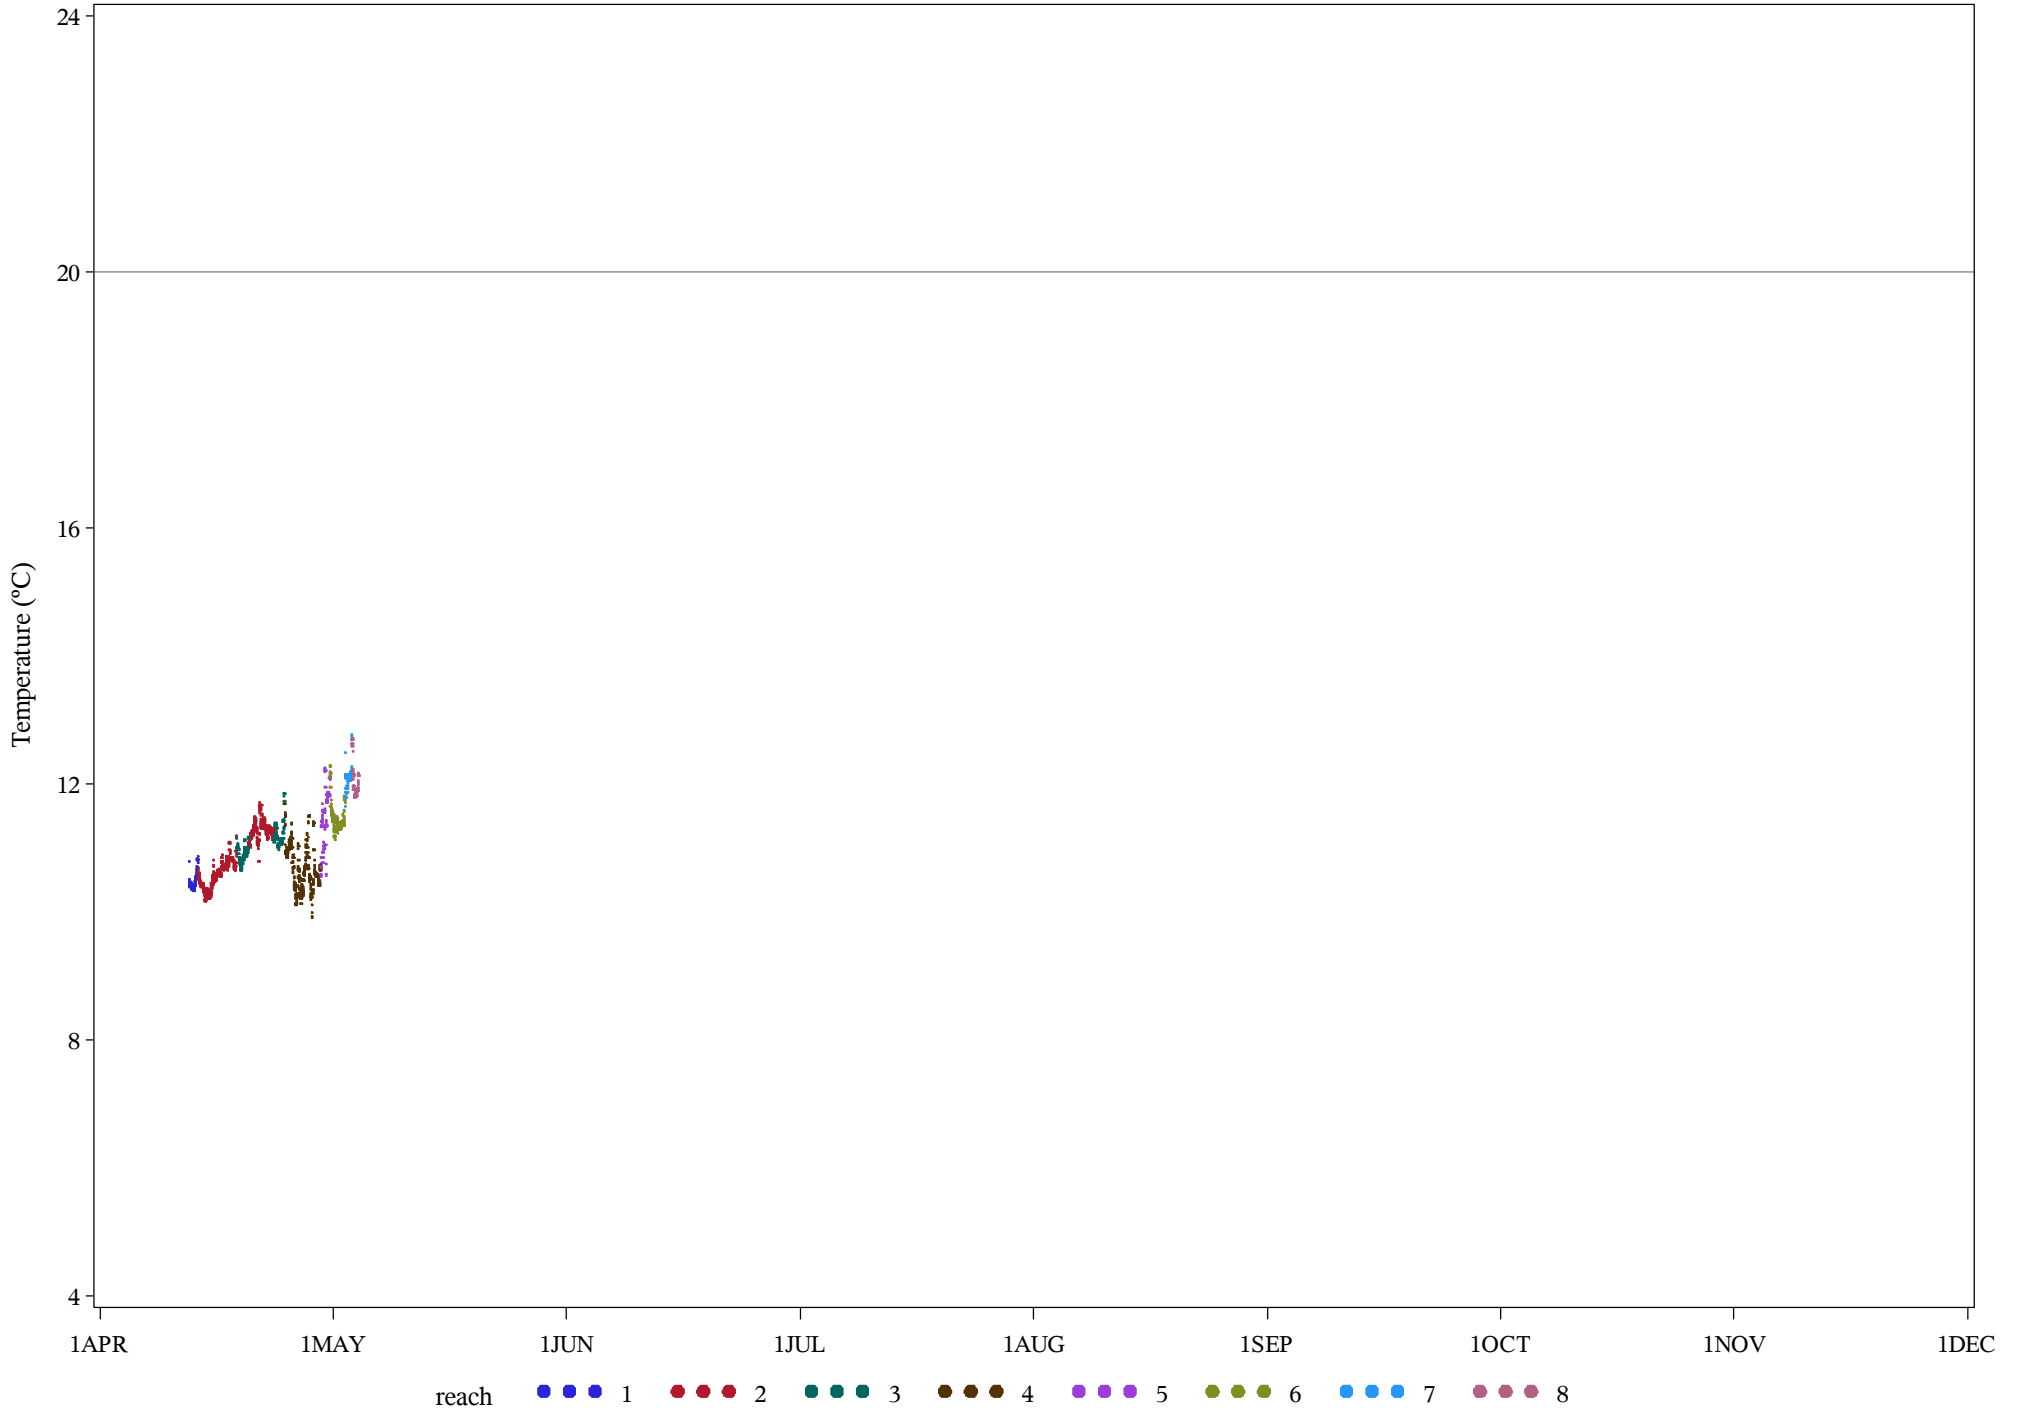

# Spring Chinook 2666B

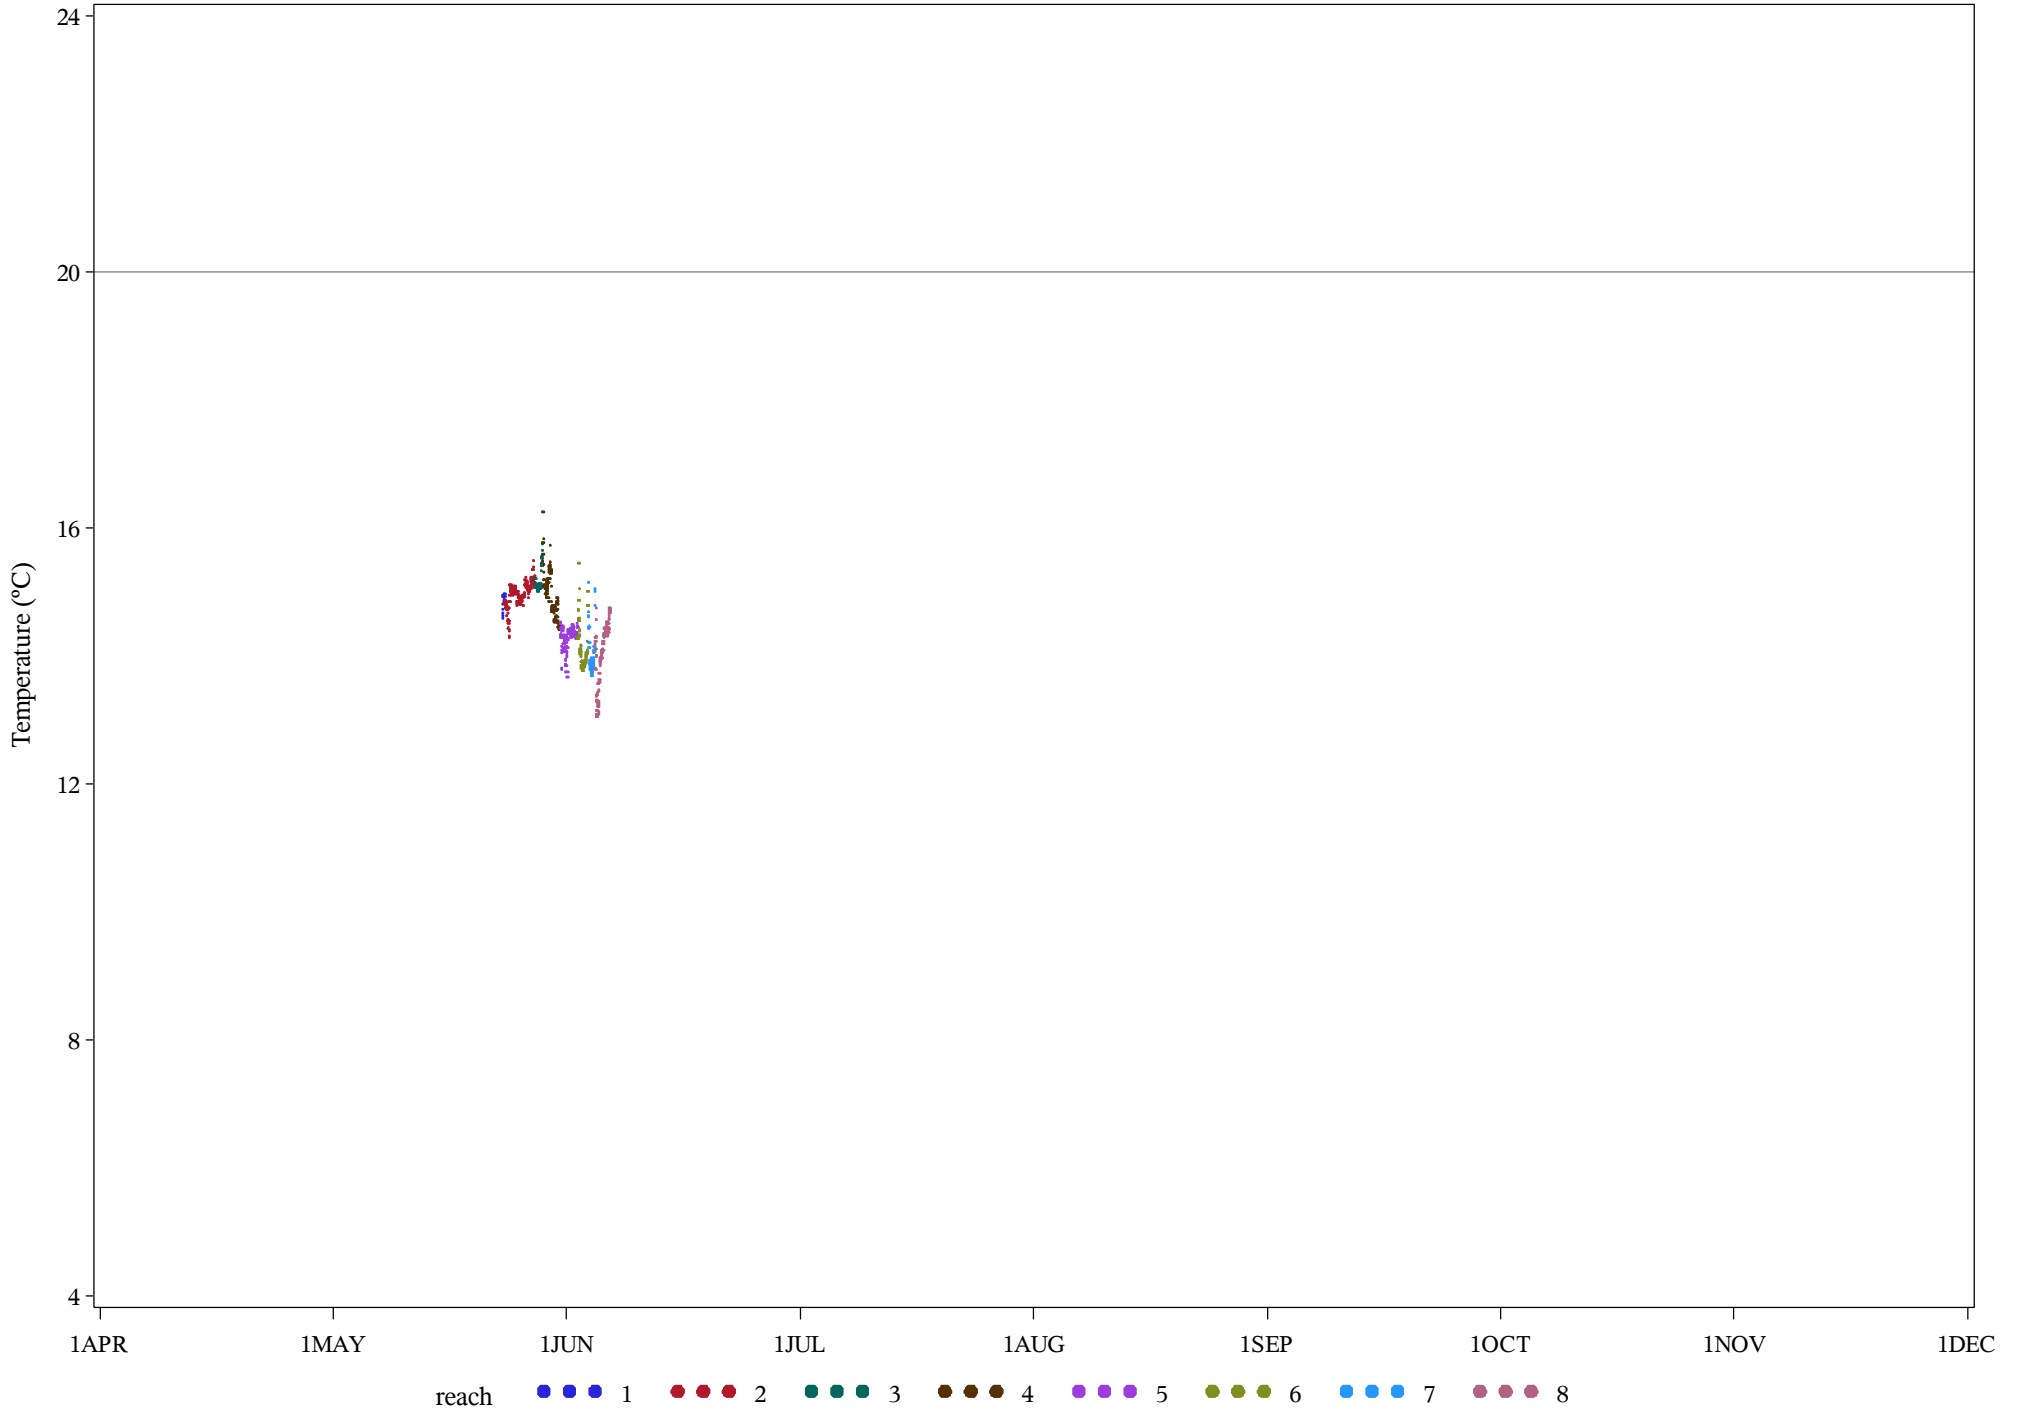

# Spring Chinook 2668A

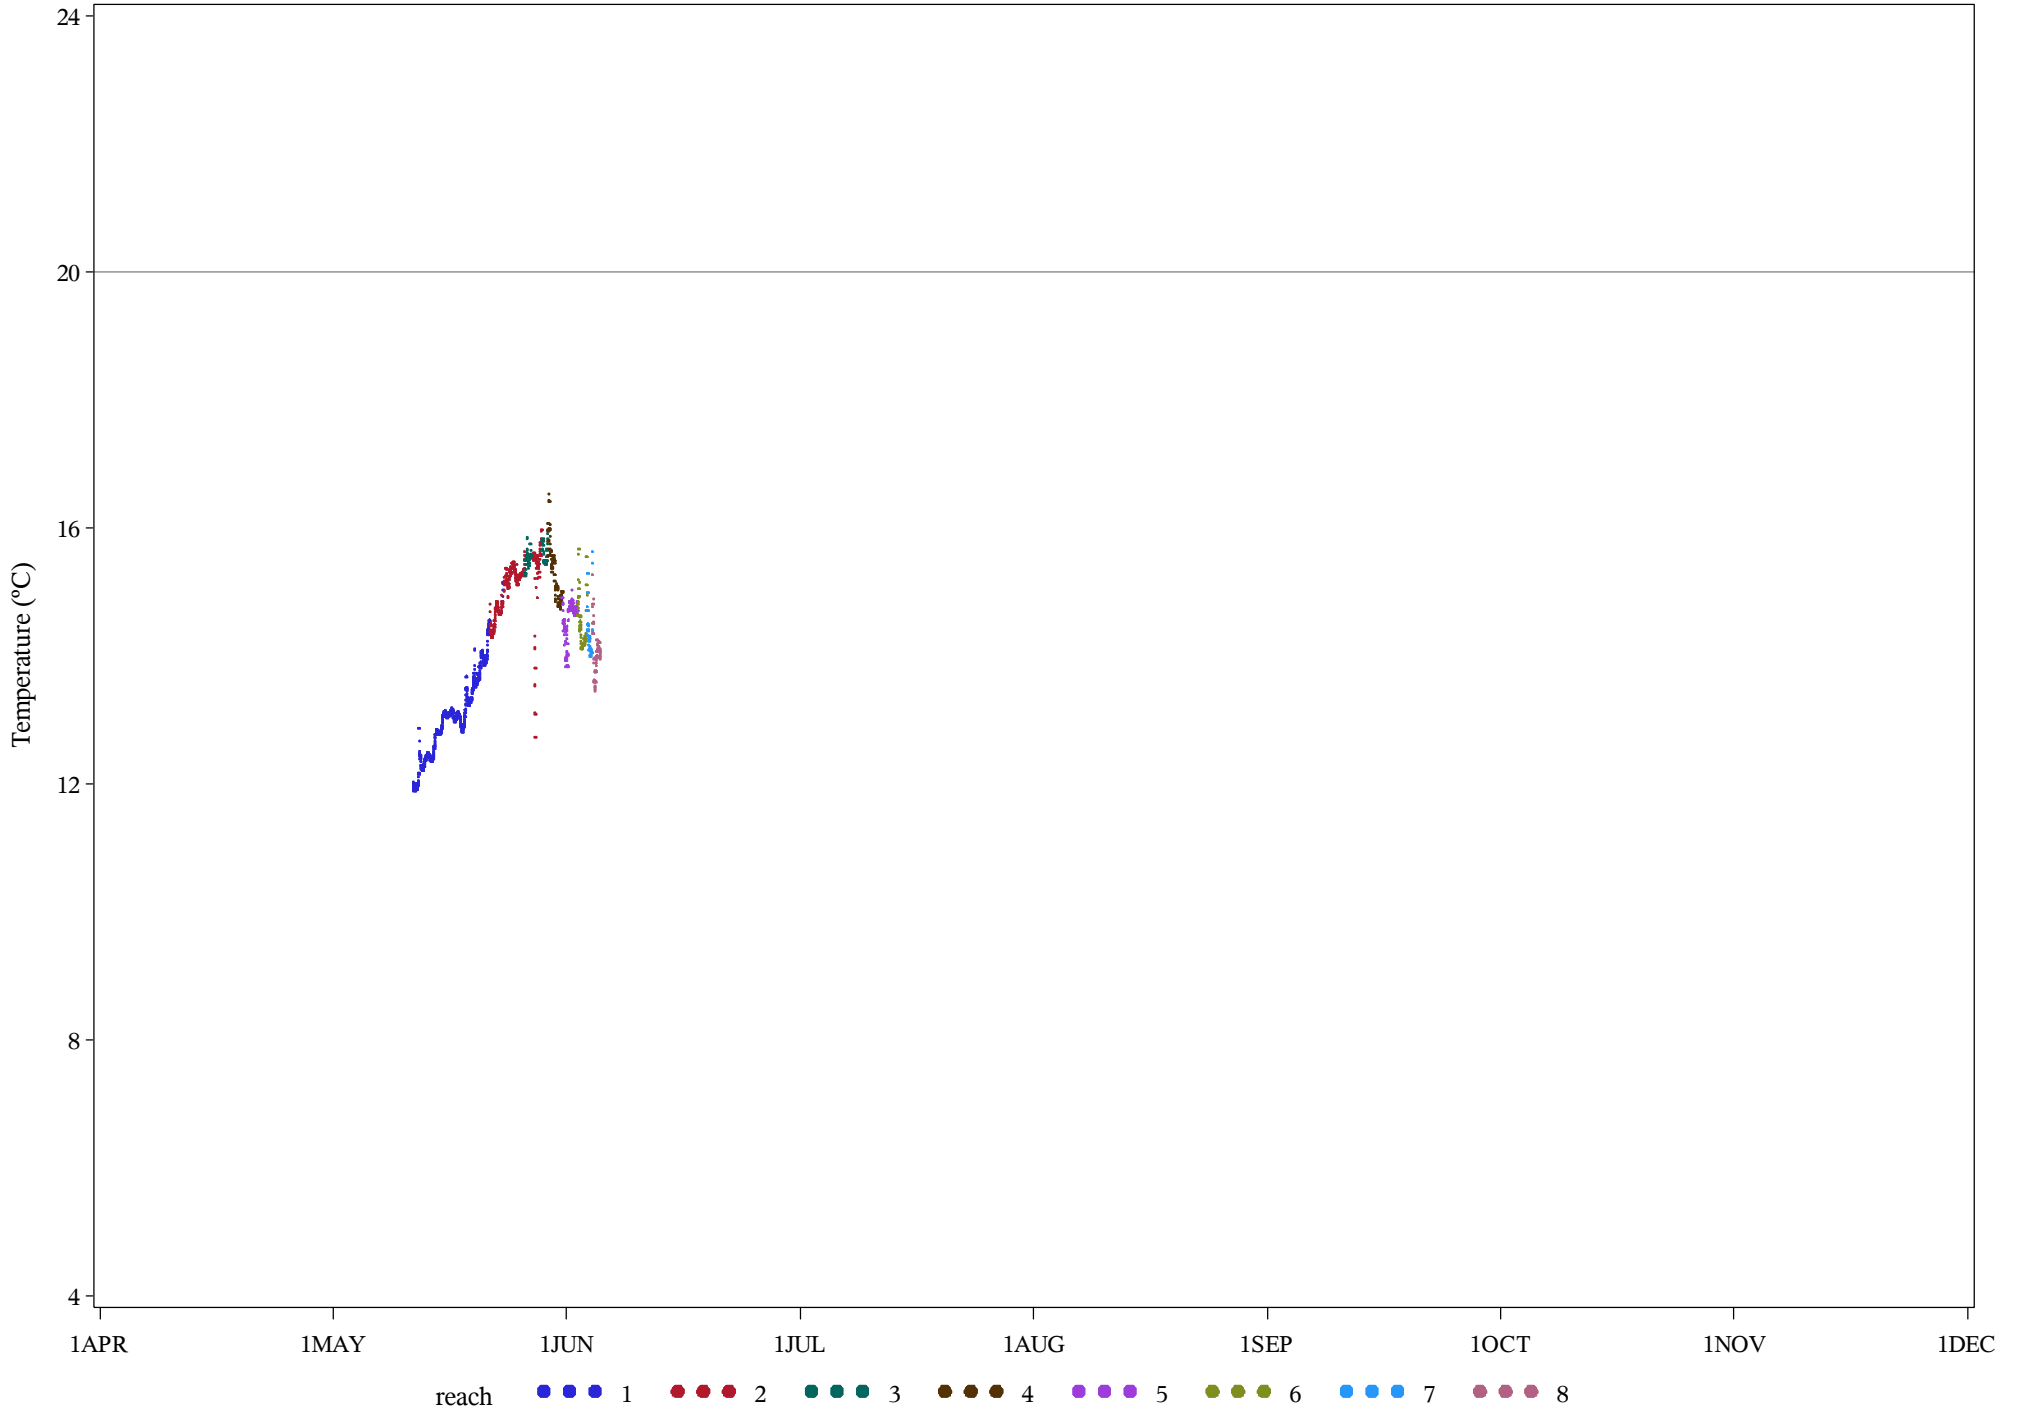

# Spring Chinook 2671A

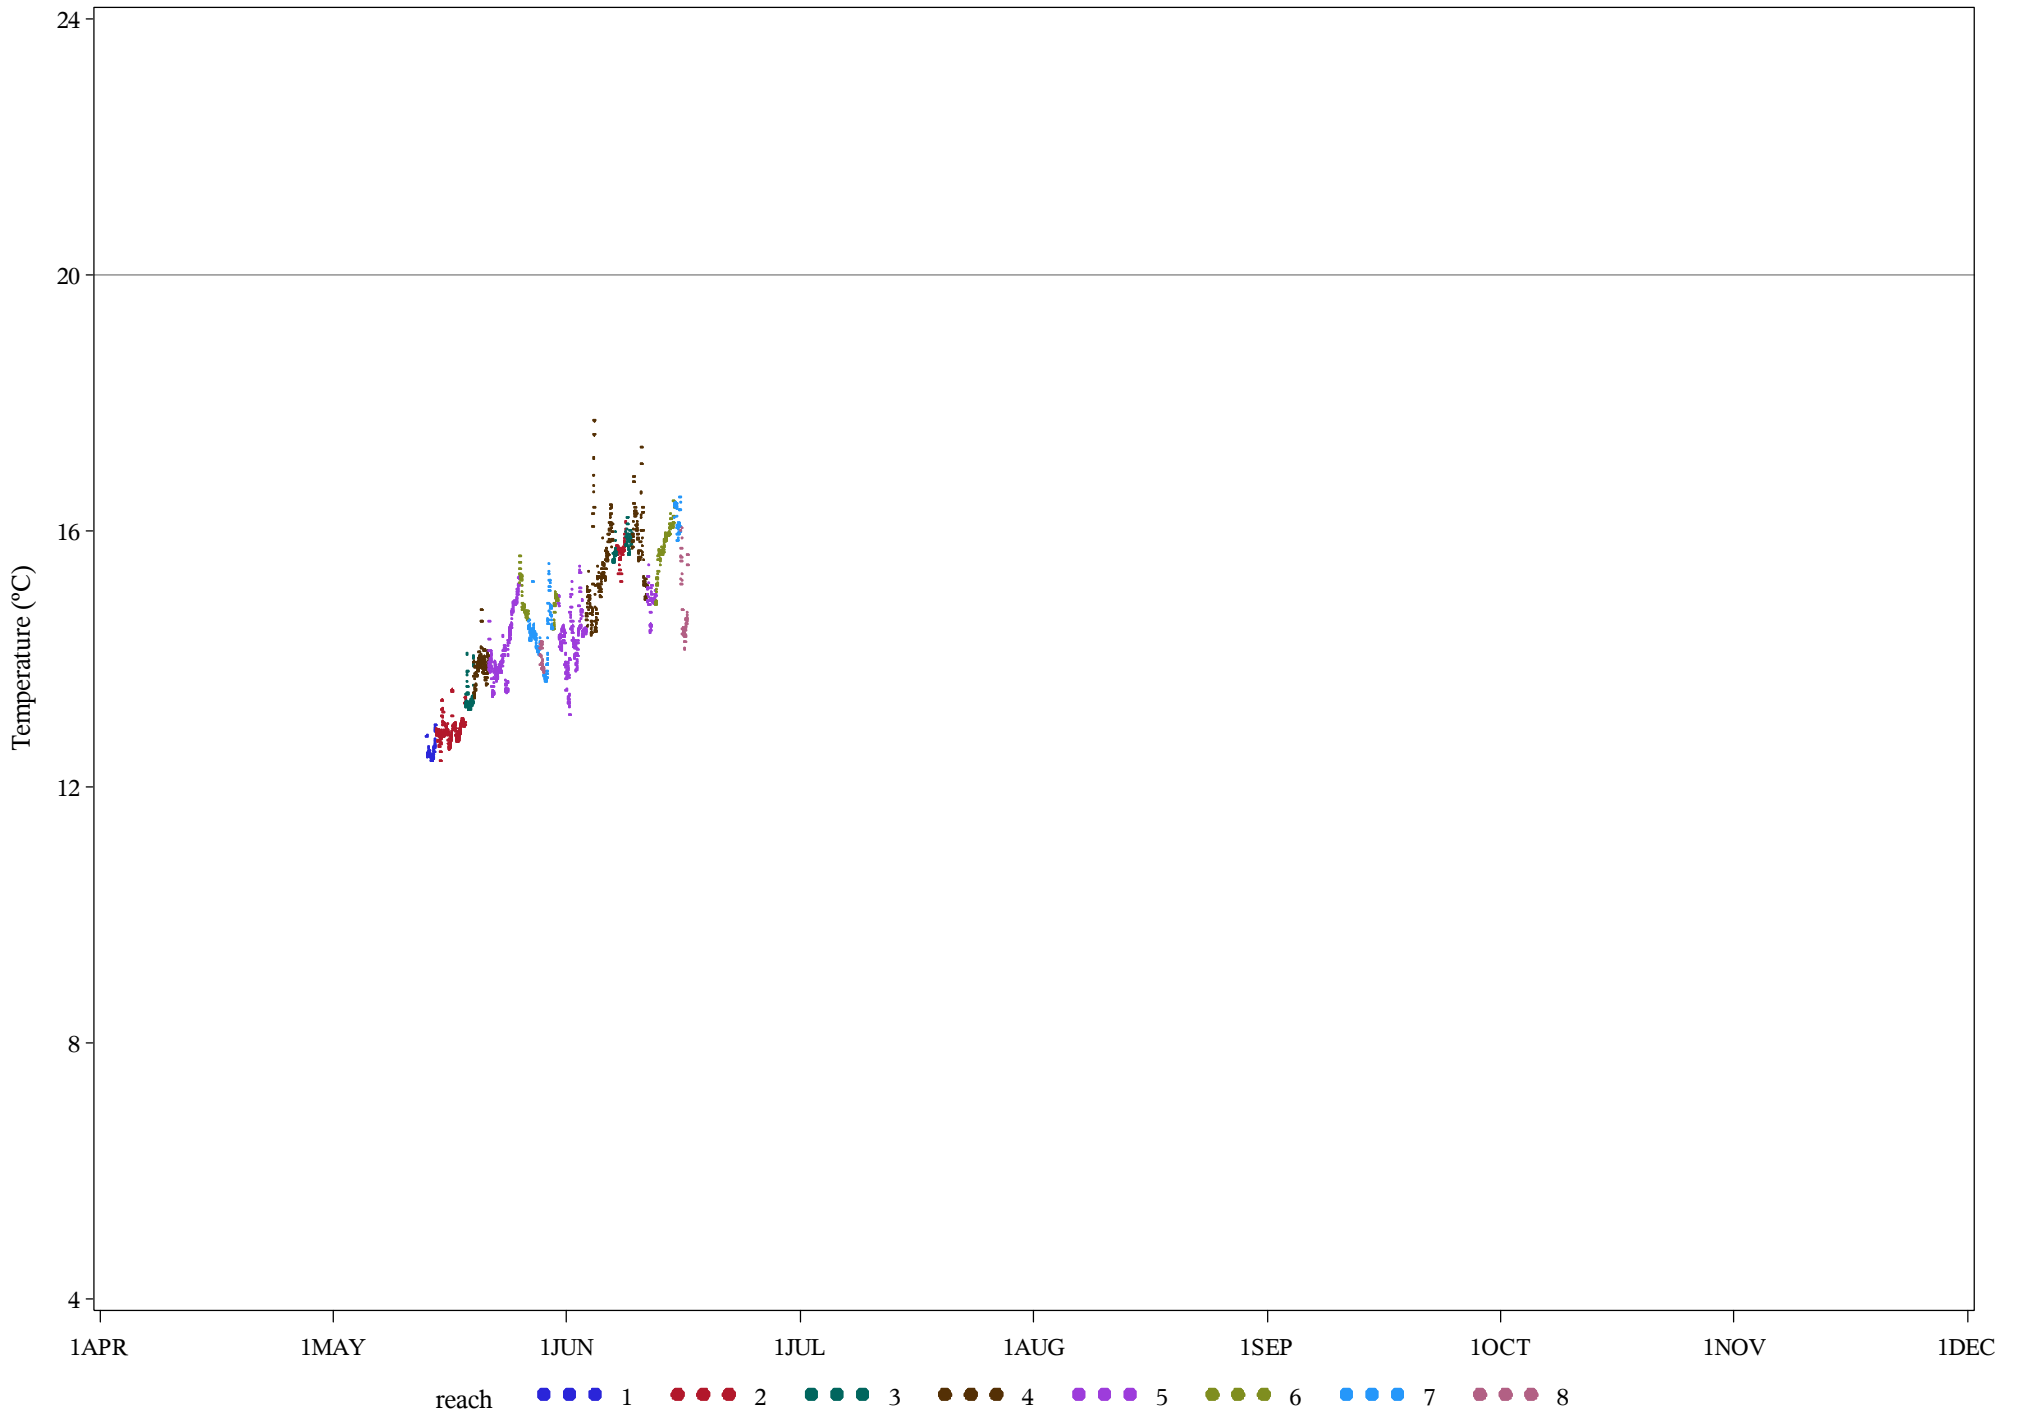



# Spring Chinook 2710B

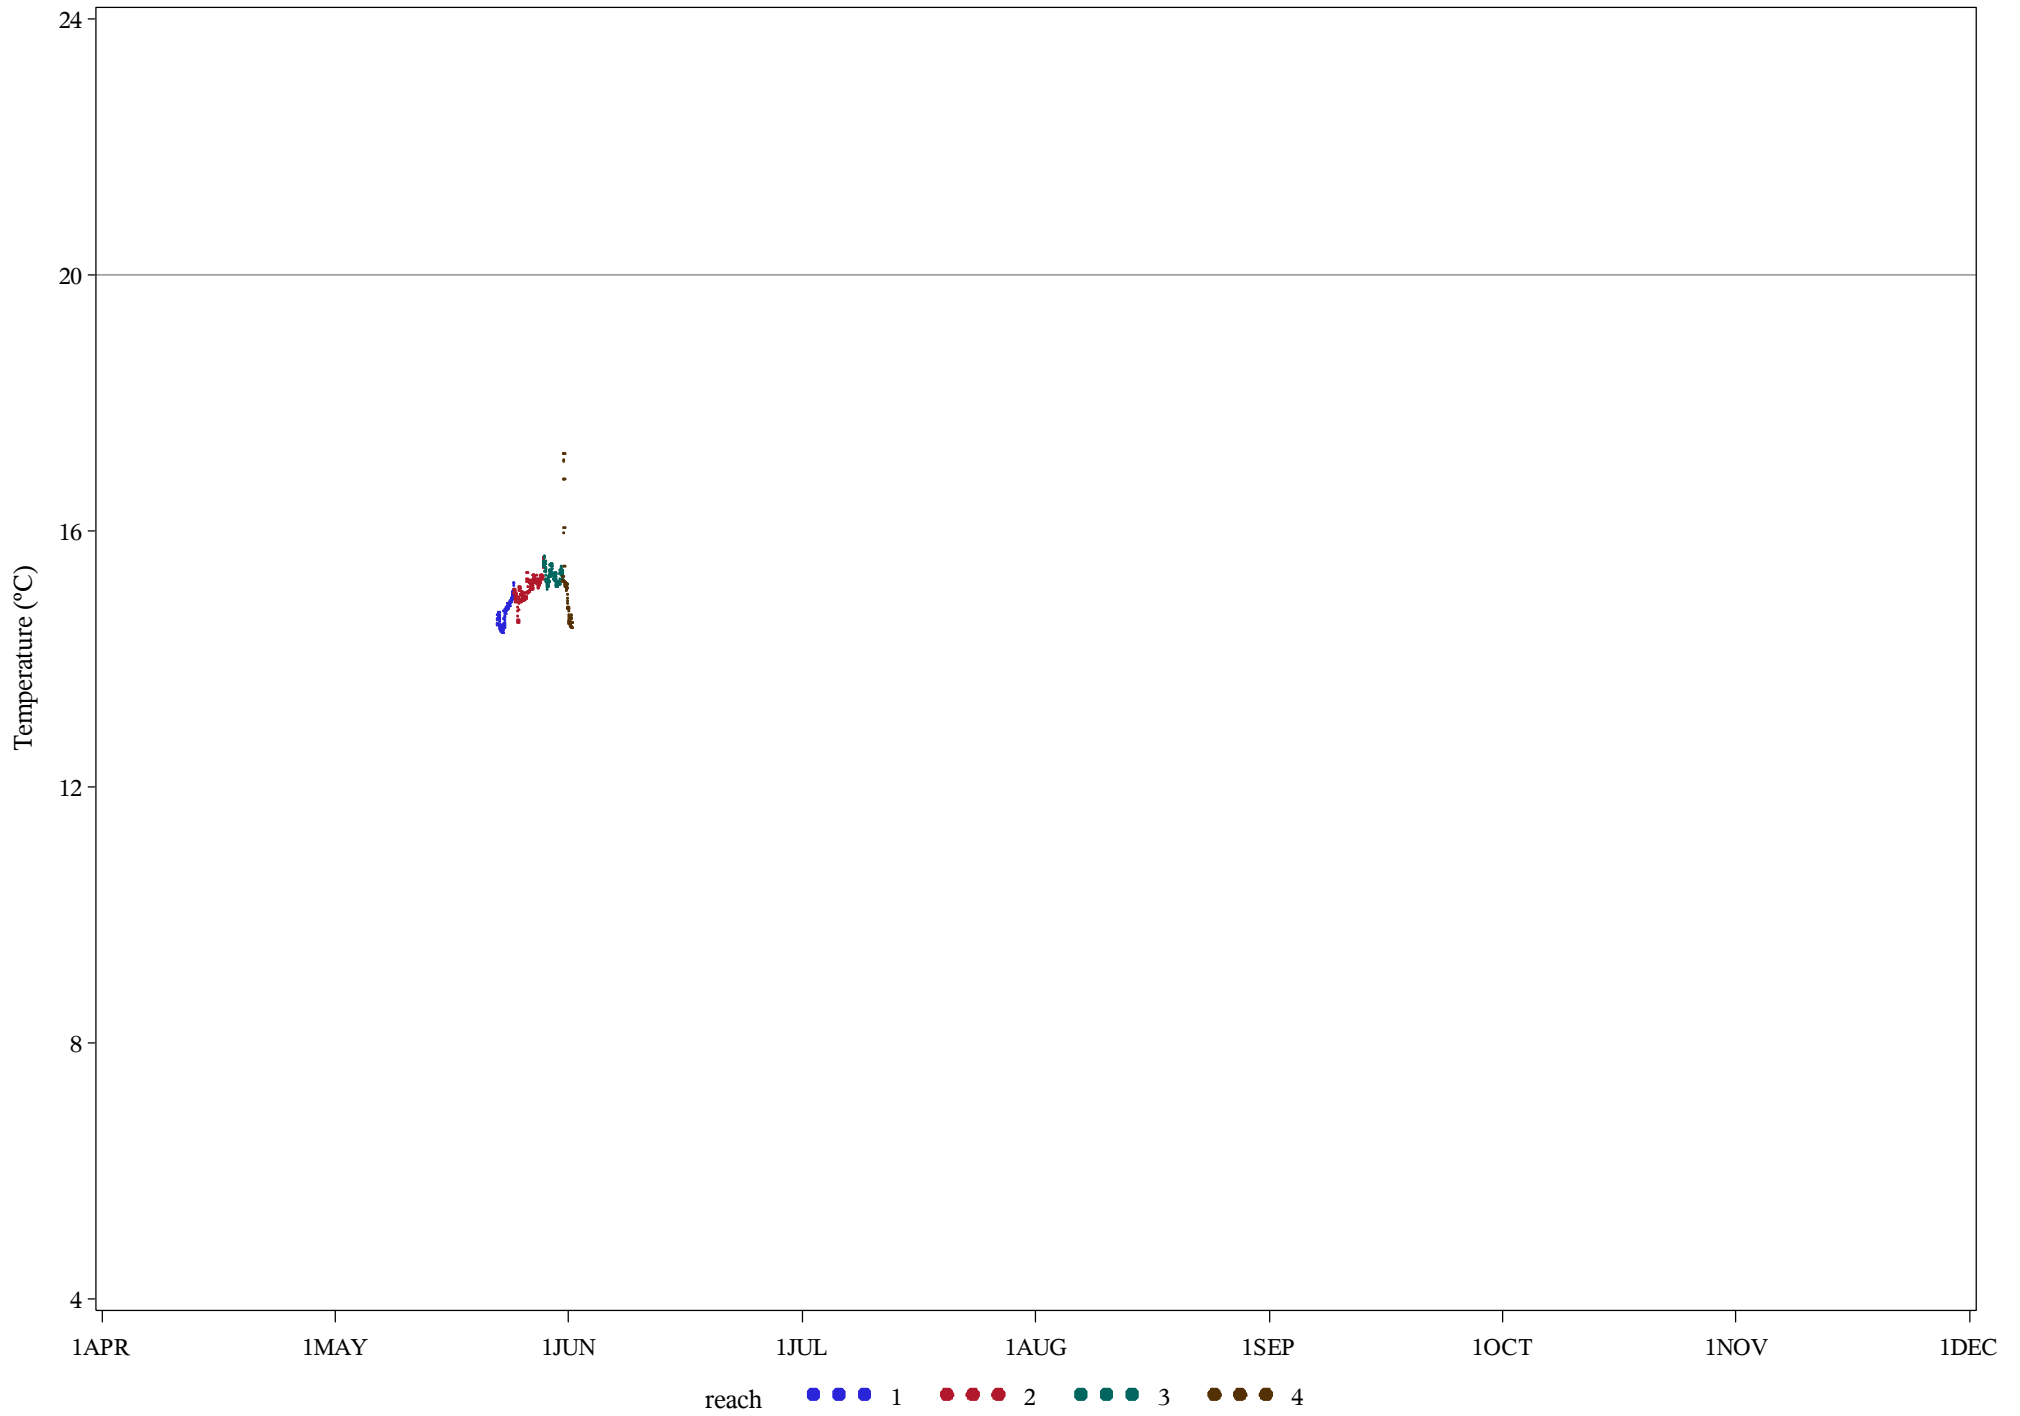



# Spring Chinook 2759A

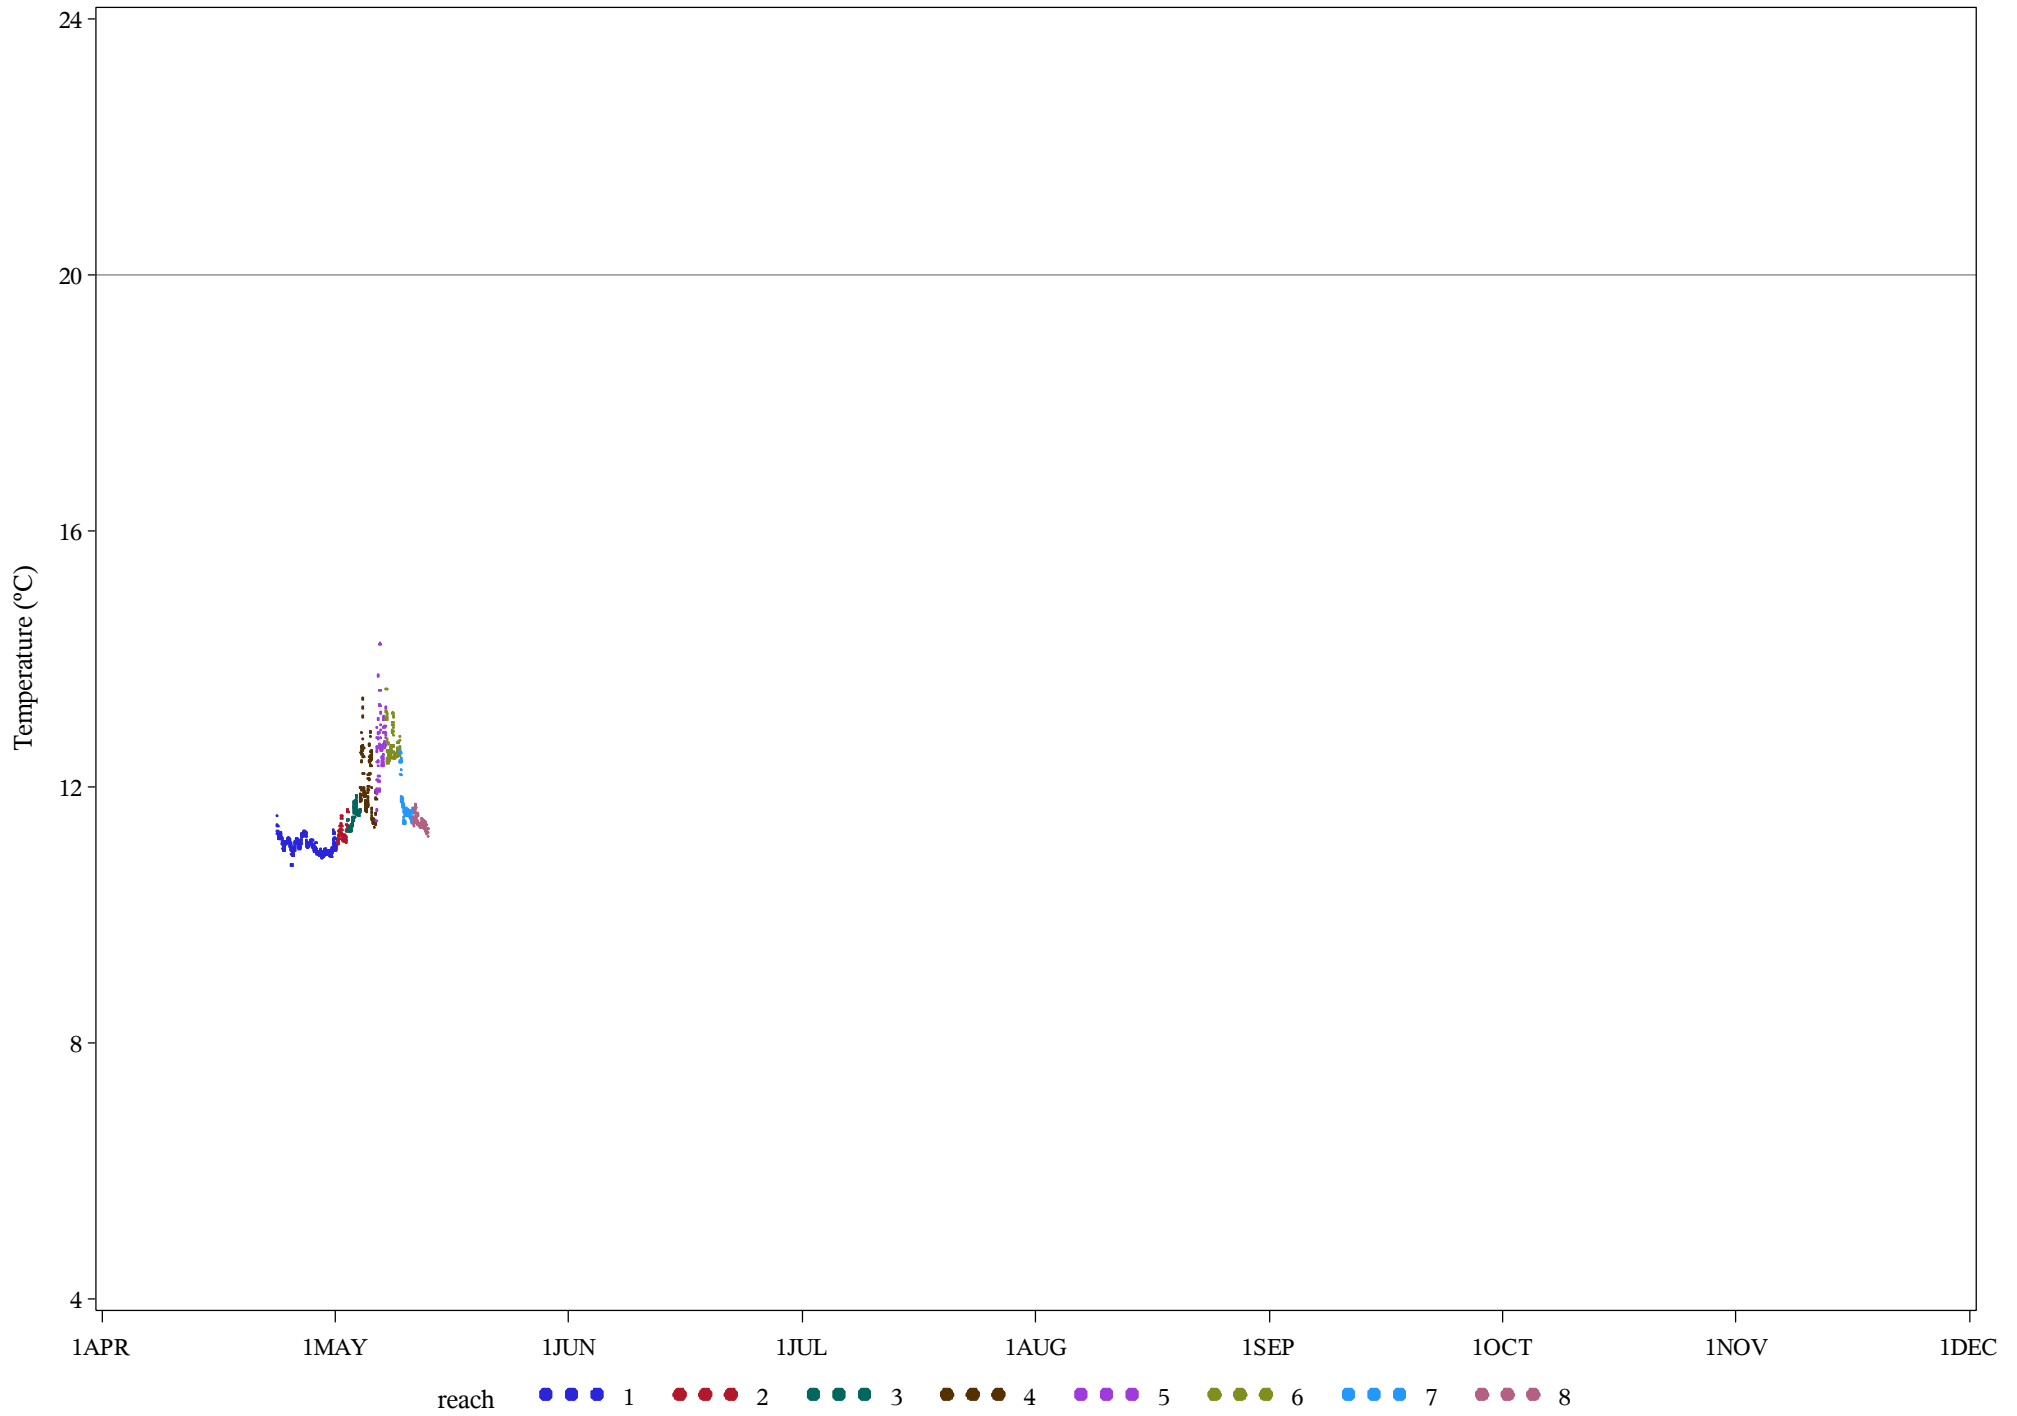



# Spring Chinook 2770A

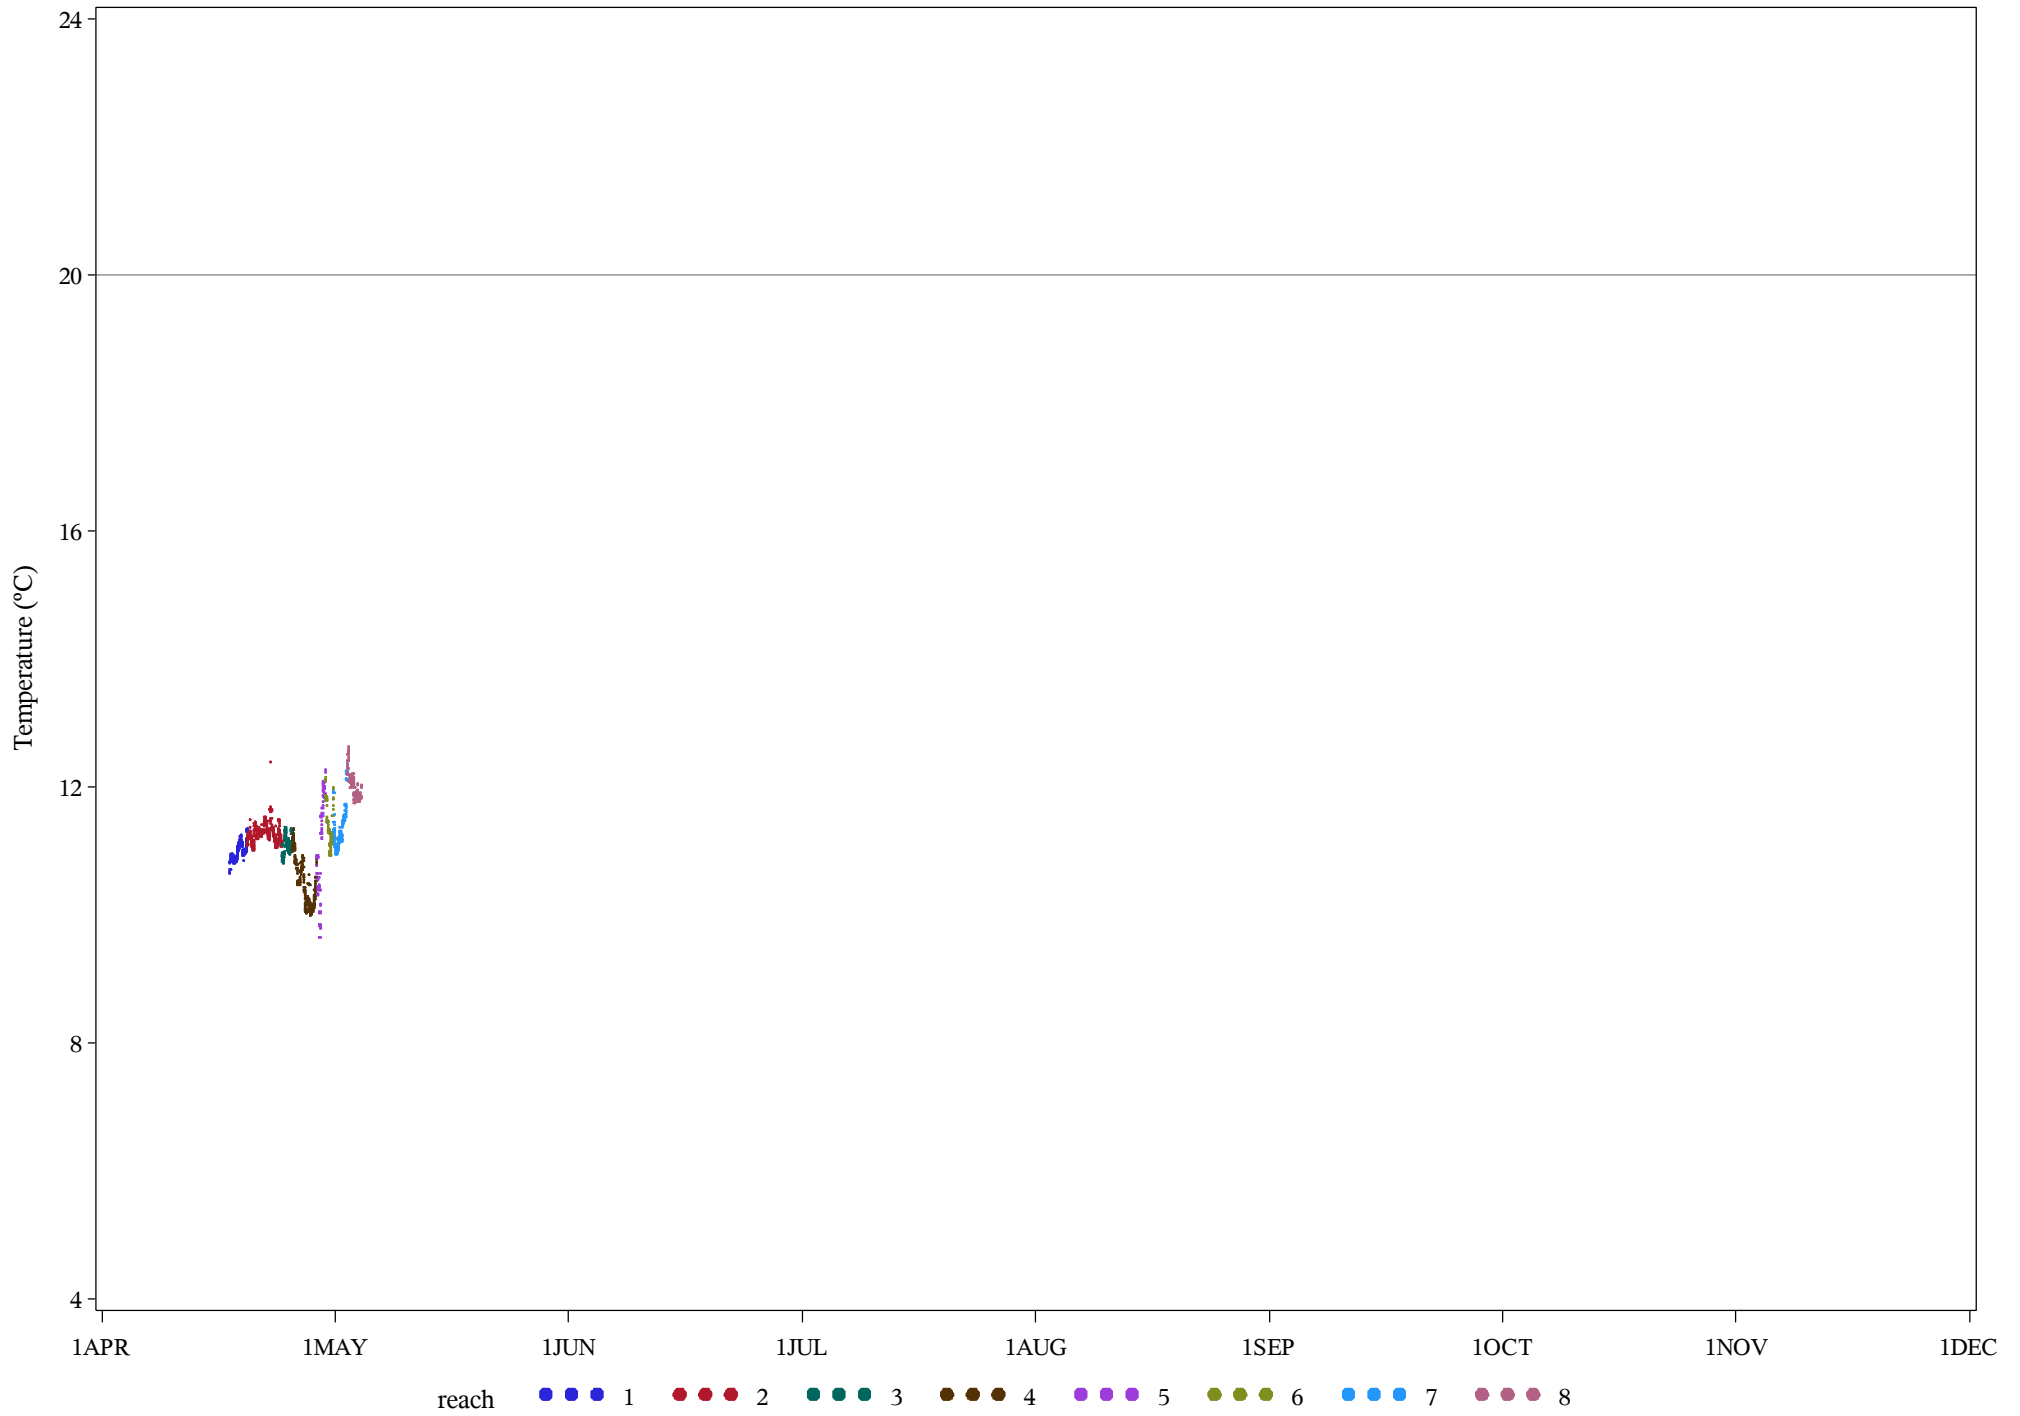

# Spring Chinook 2770B

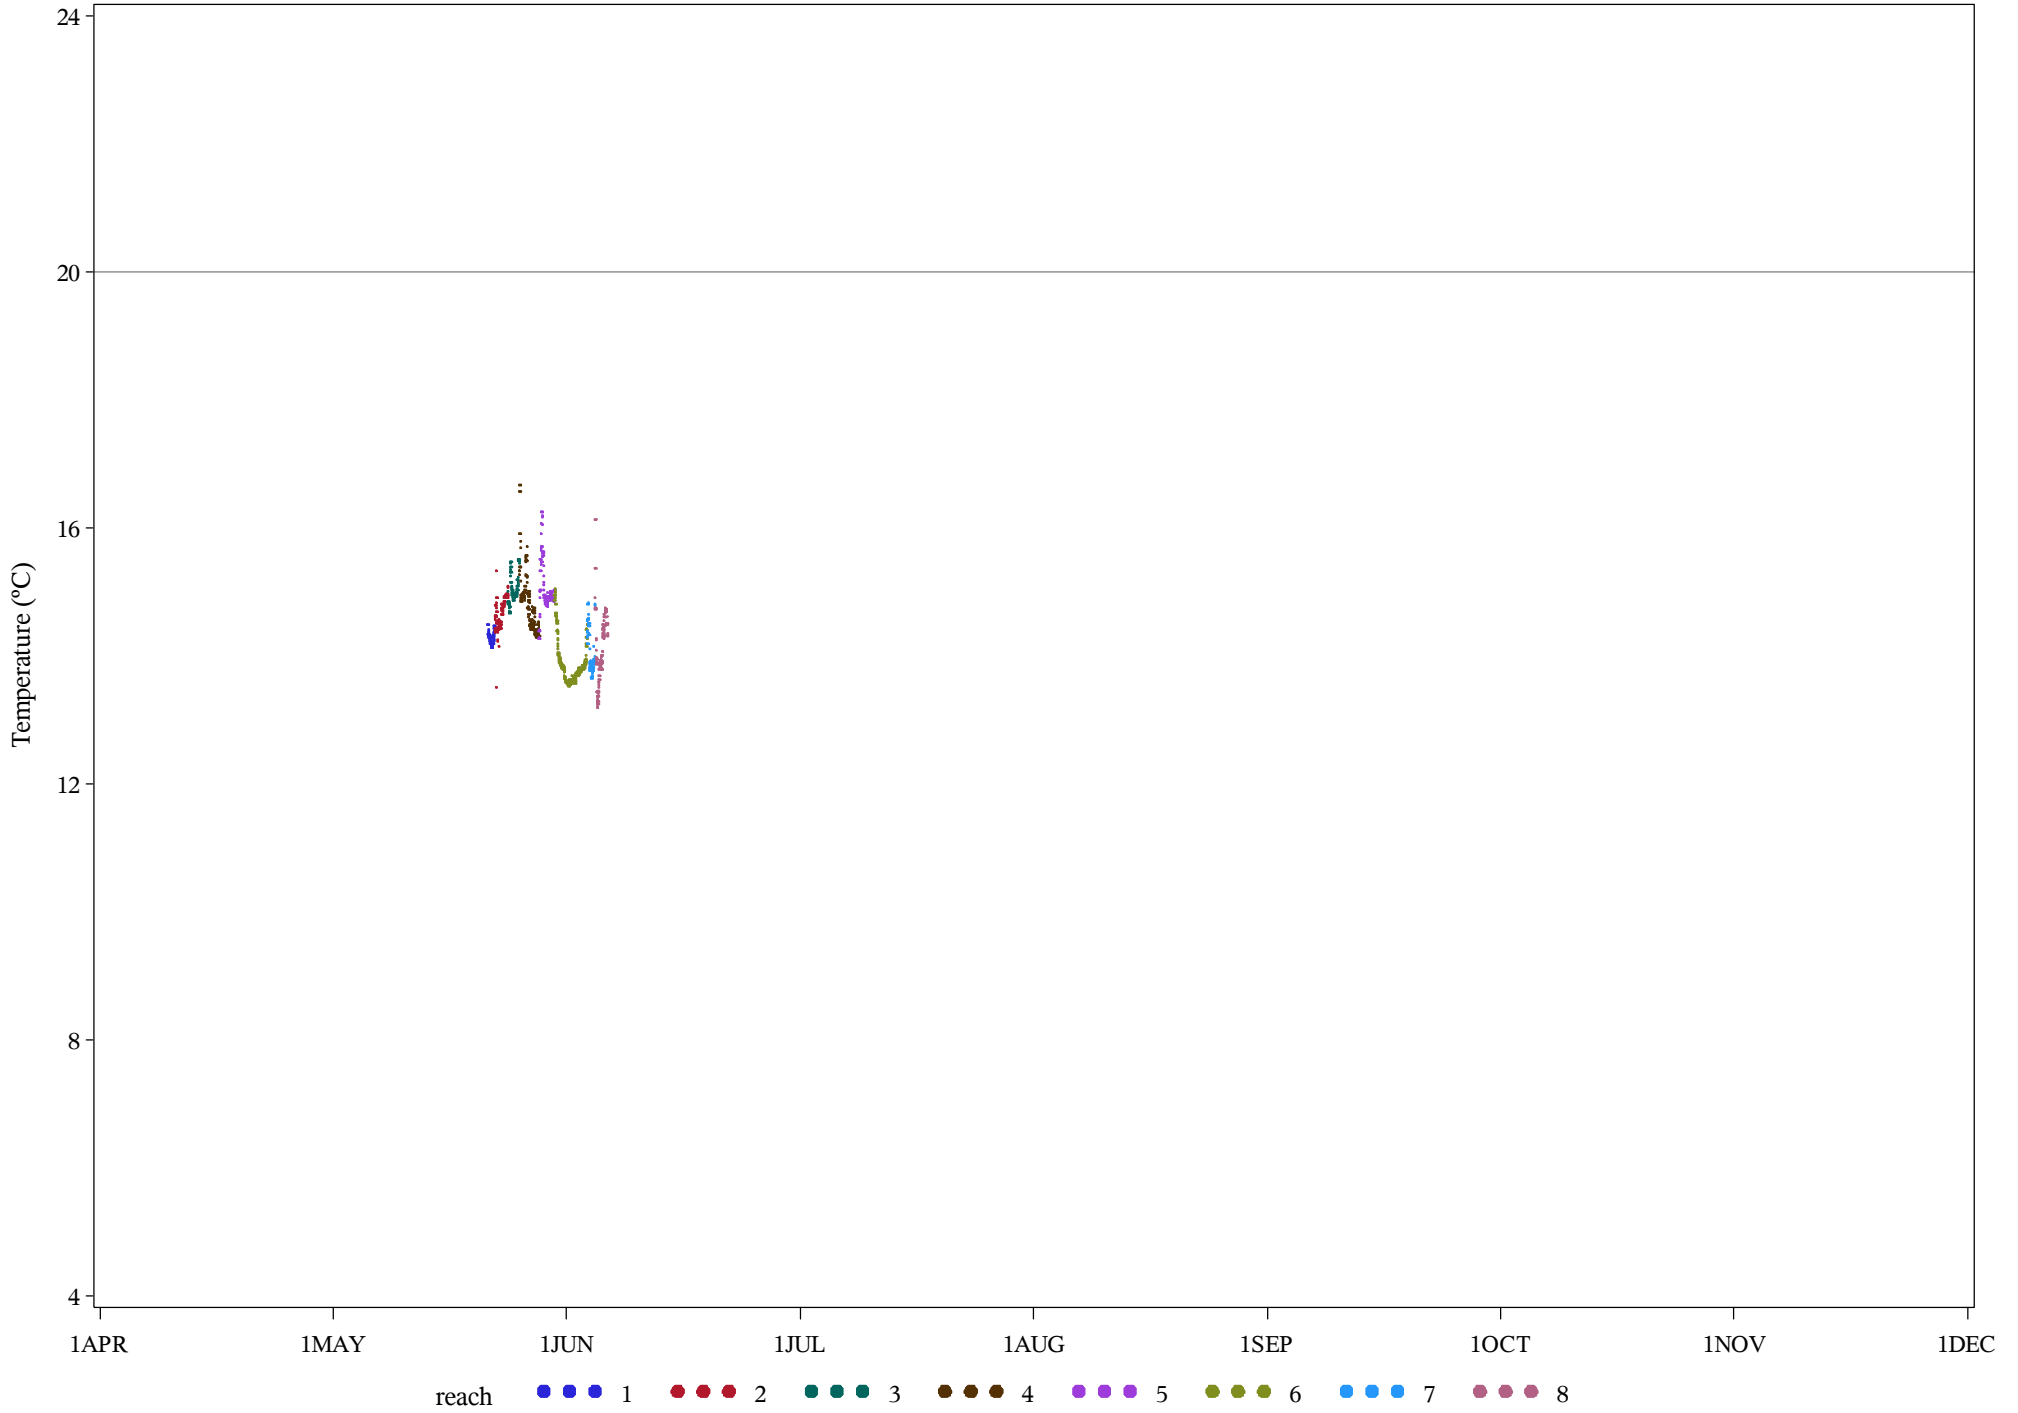



# Spring Chinook 2999A

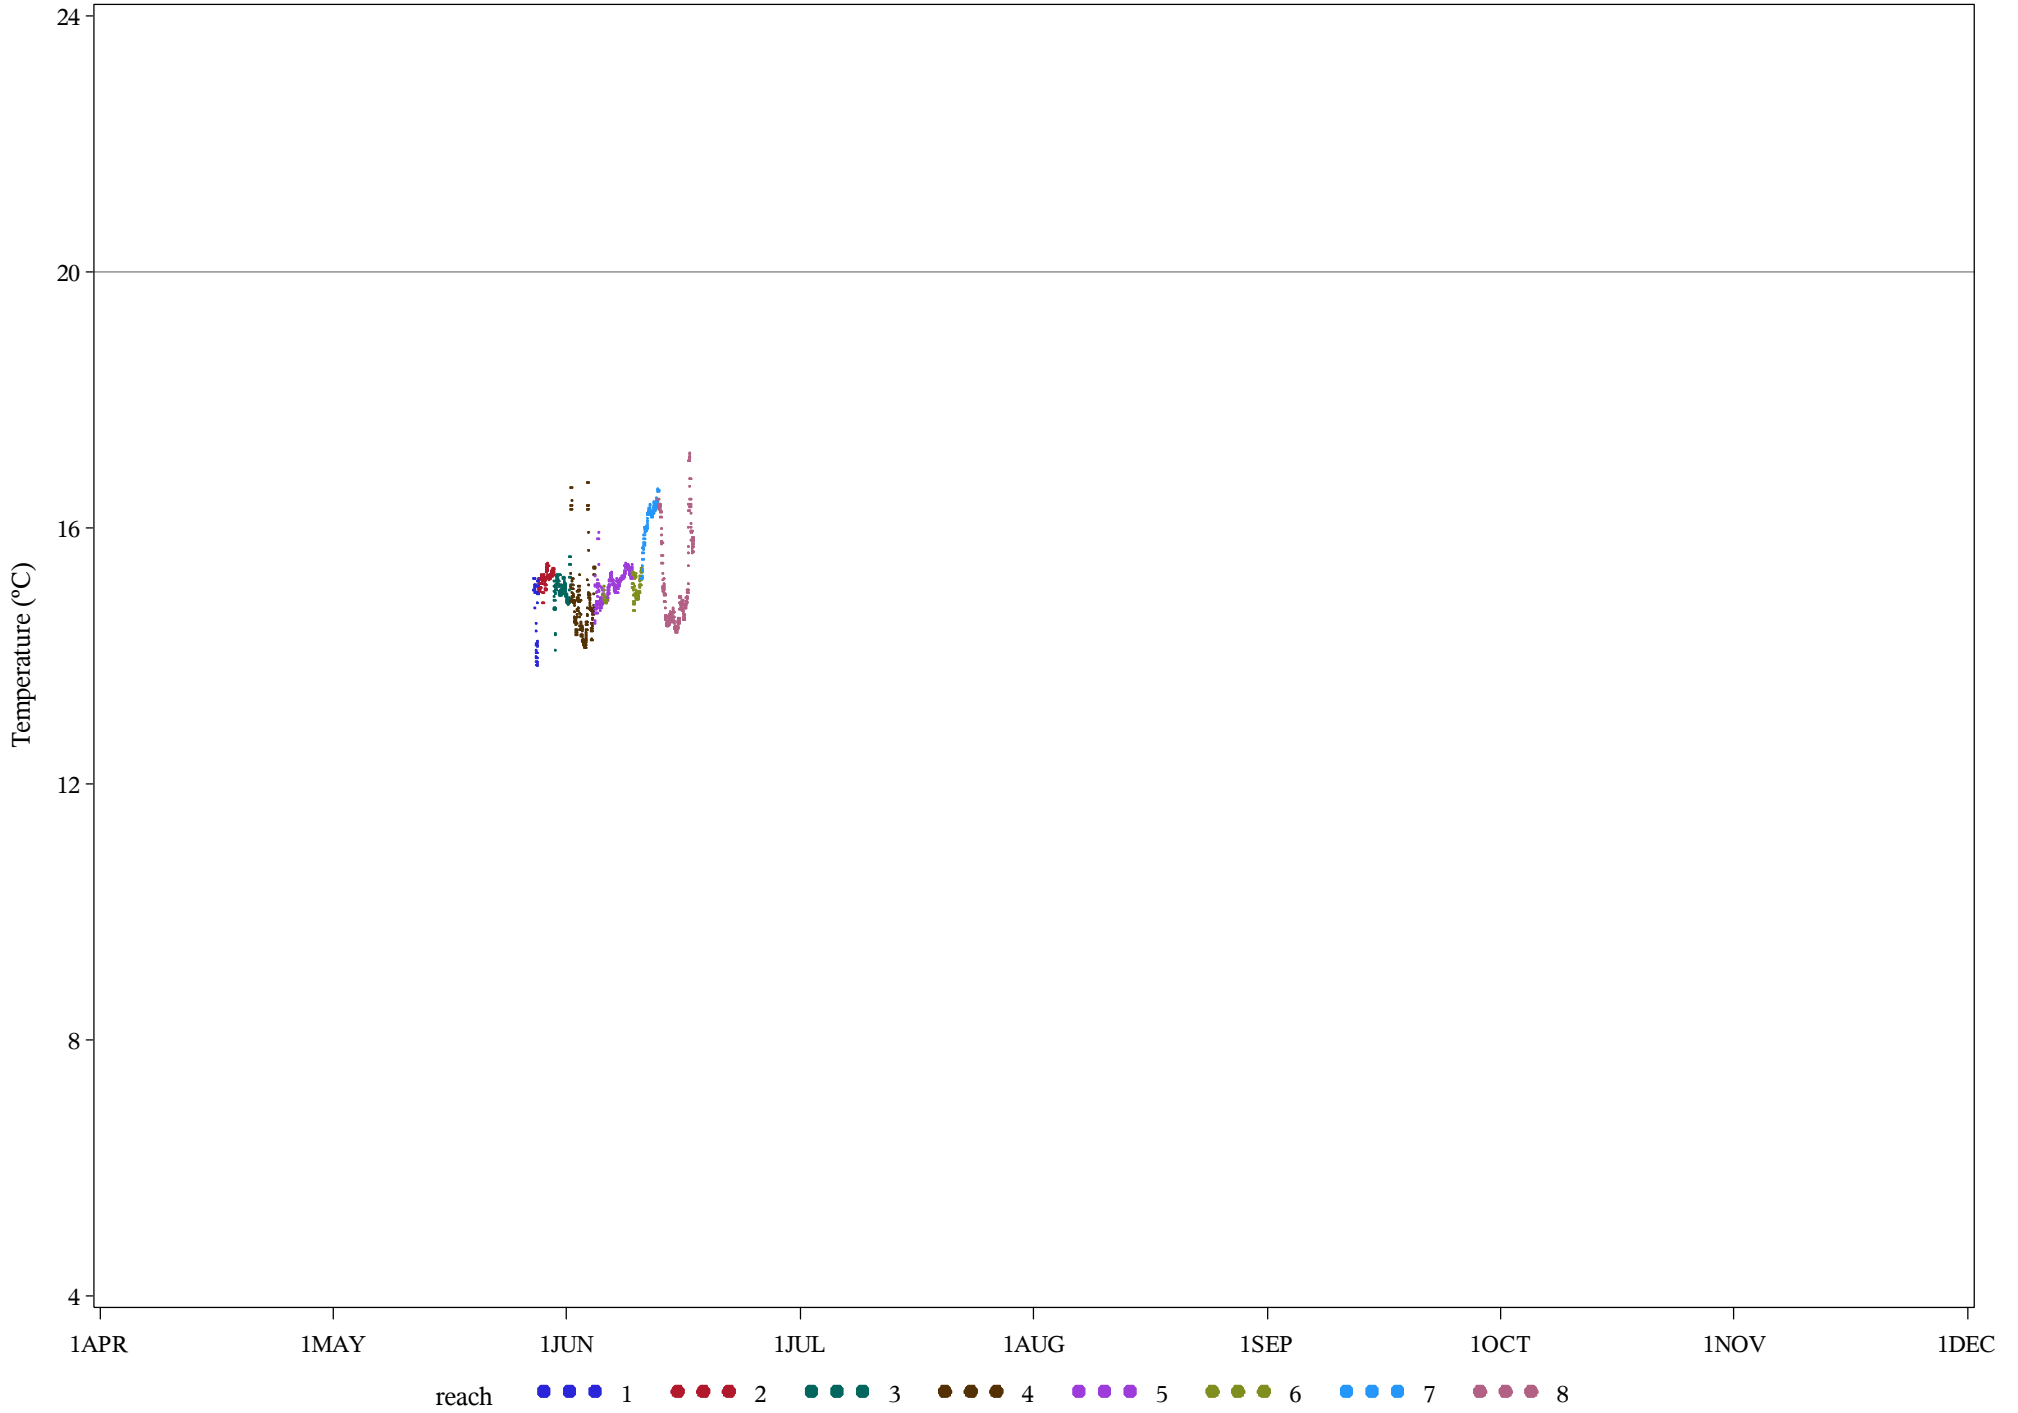

# Spring Chinook 3033A

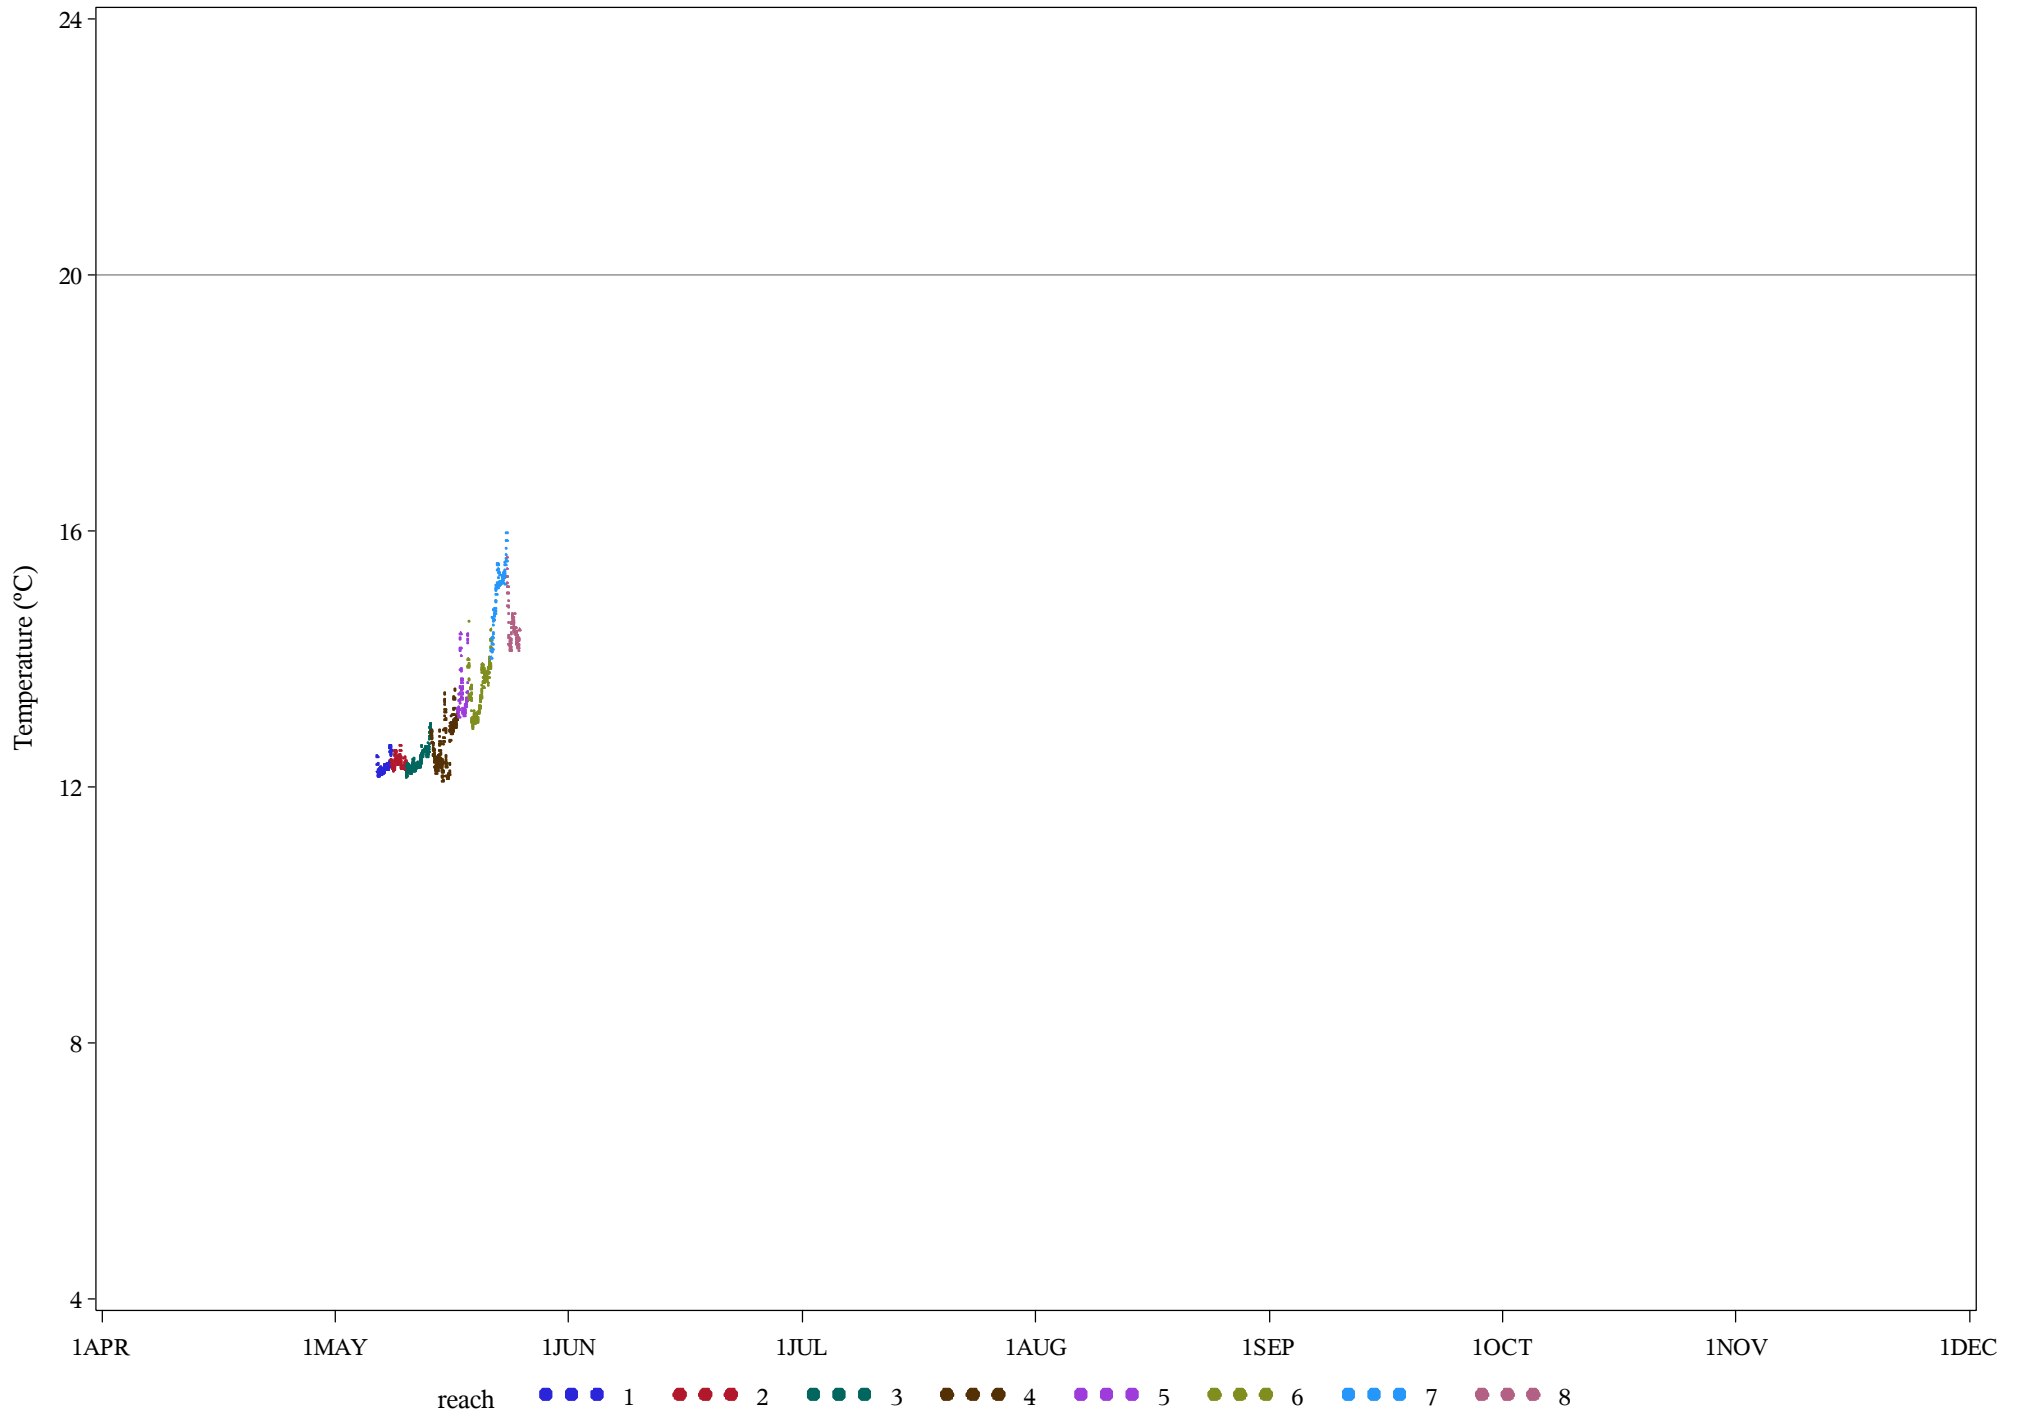





# Spring Chinook 3047B

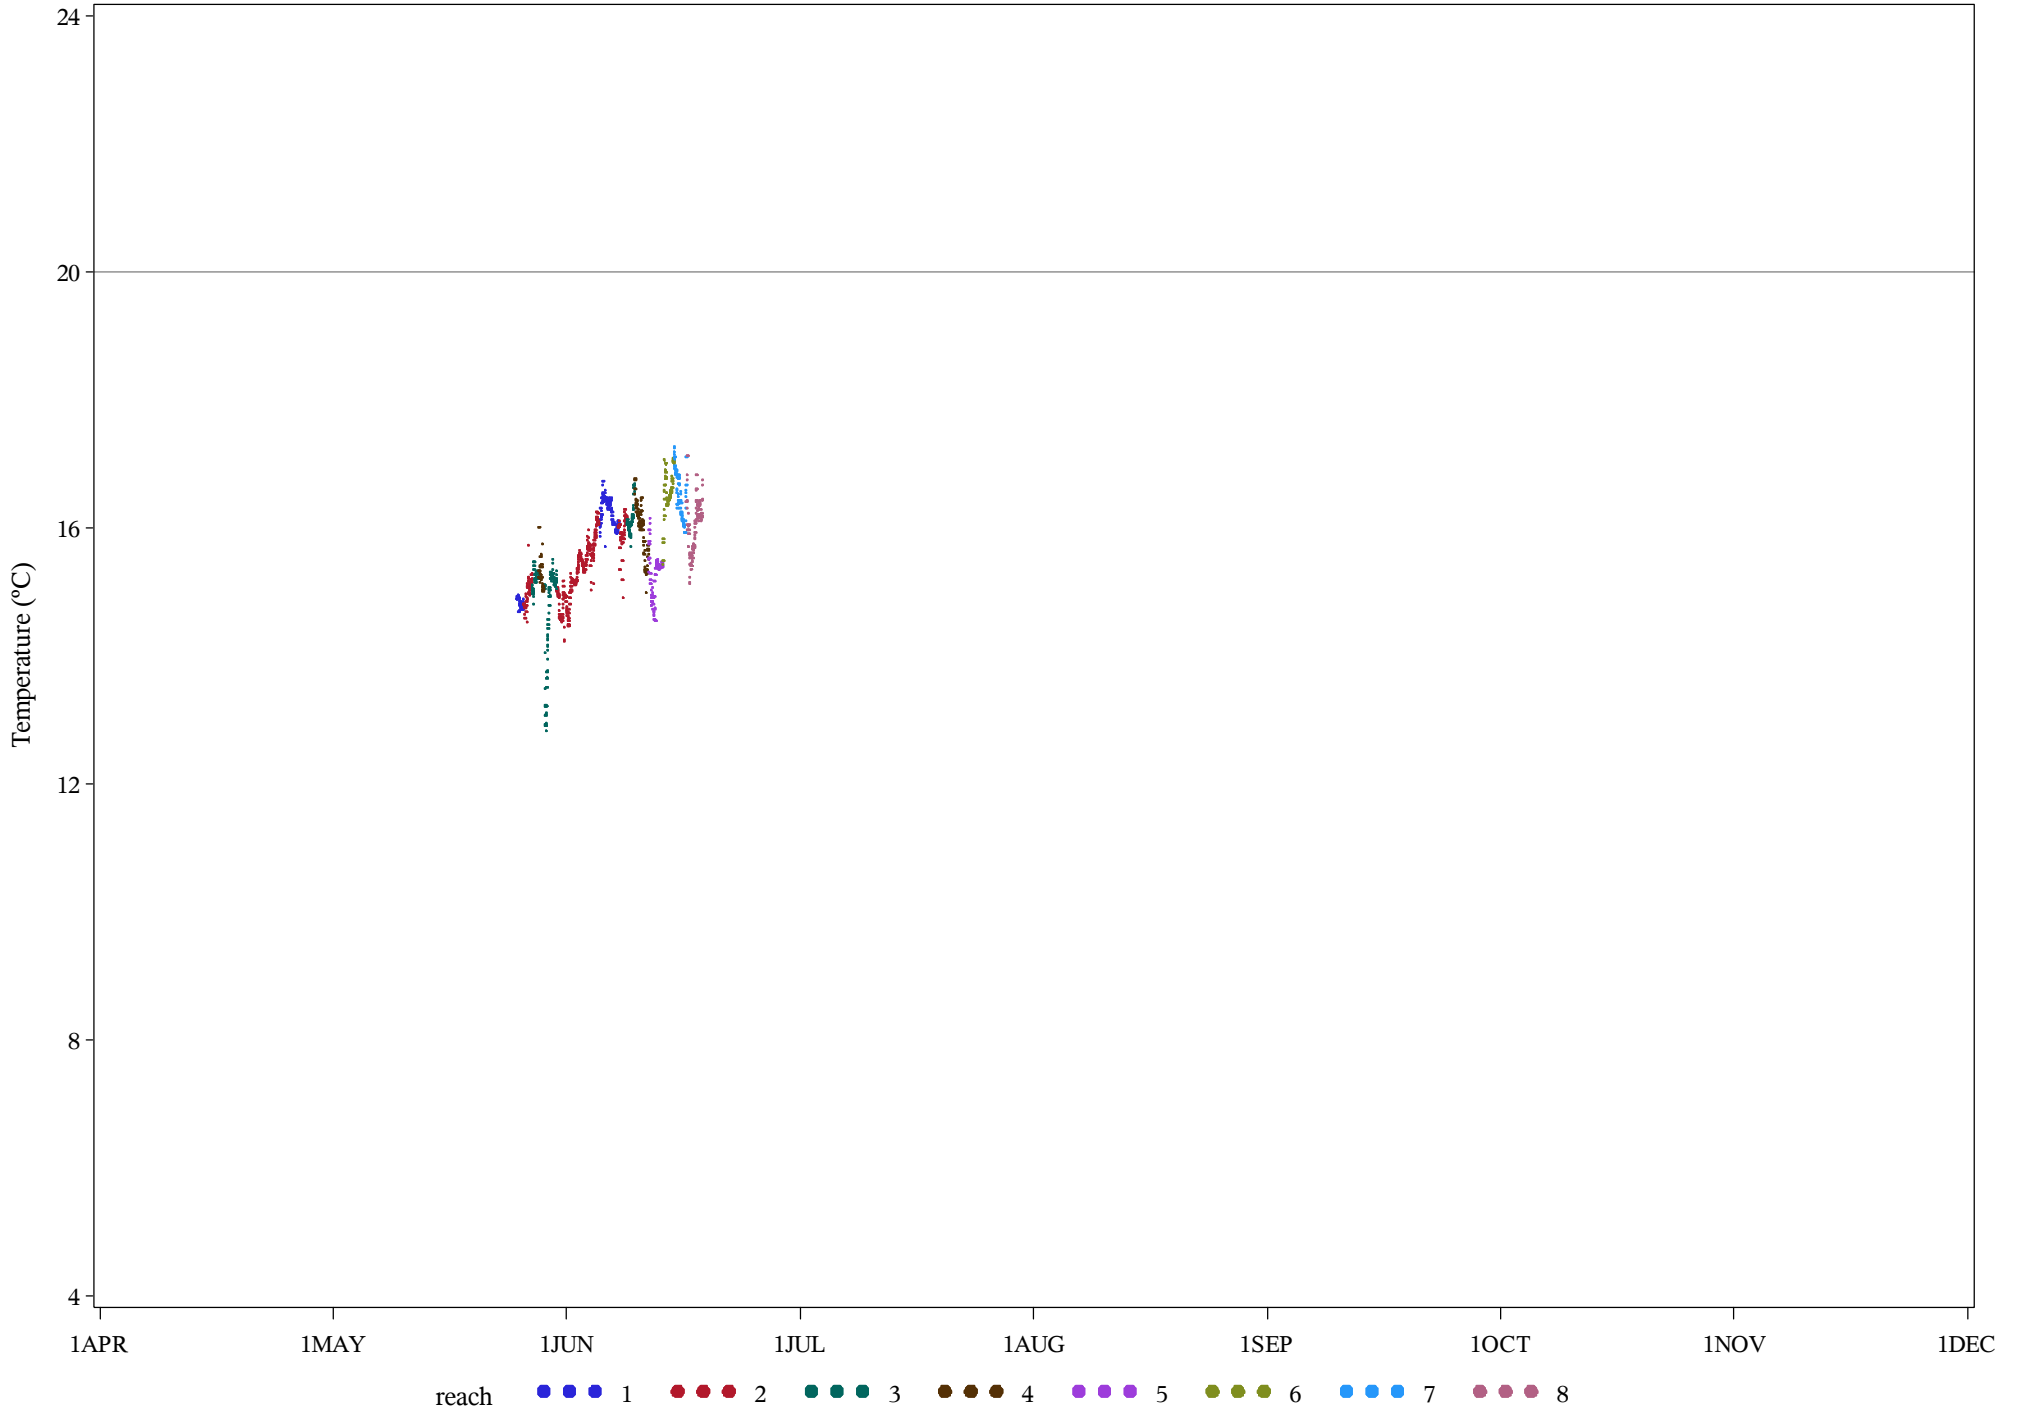



# Spring Chinook 3051A

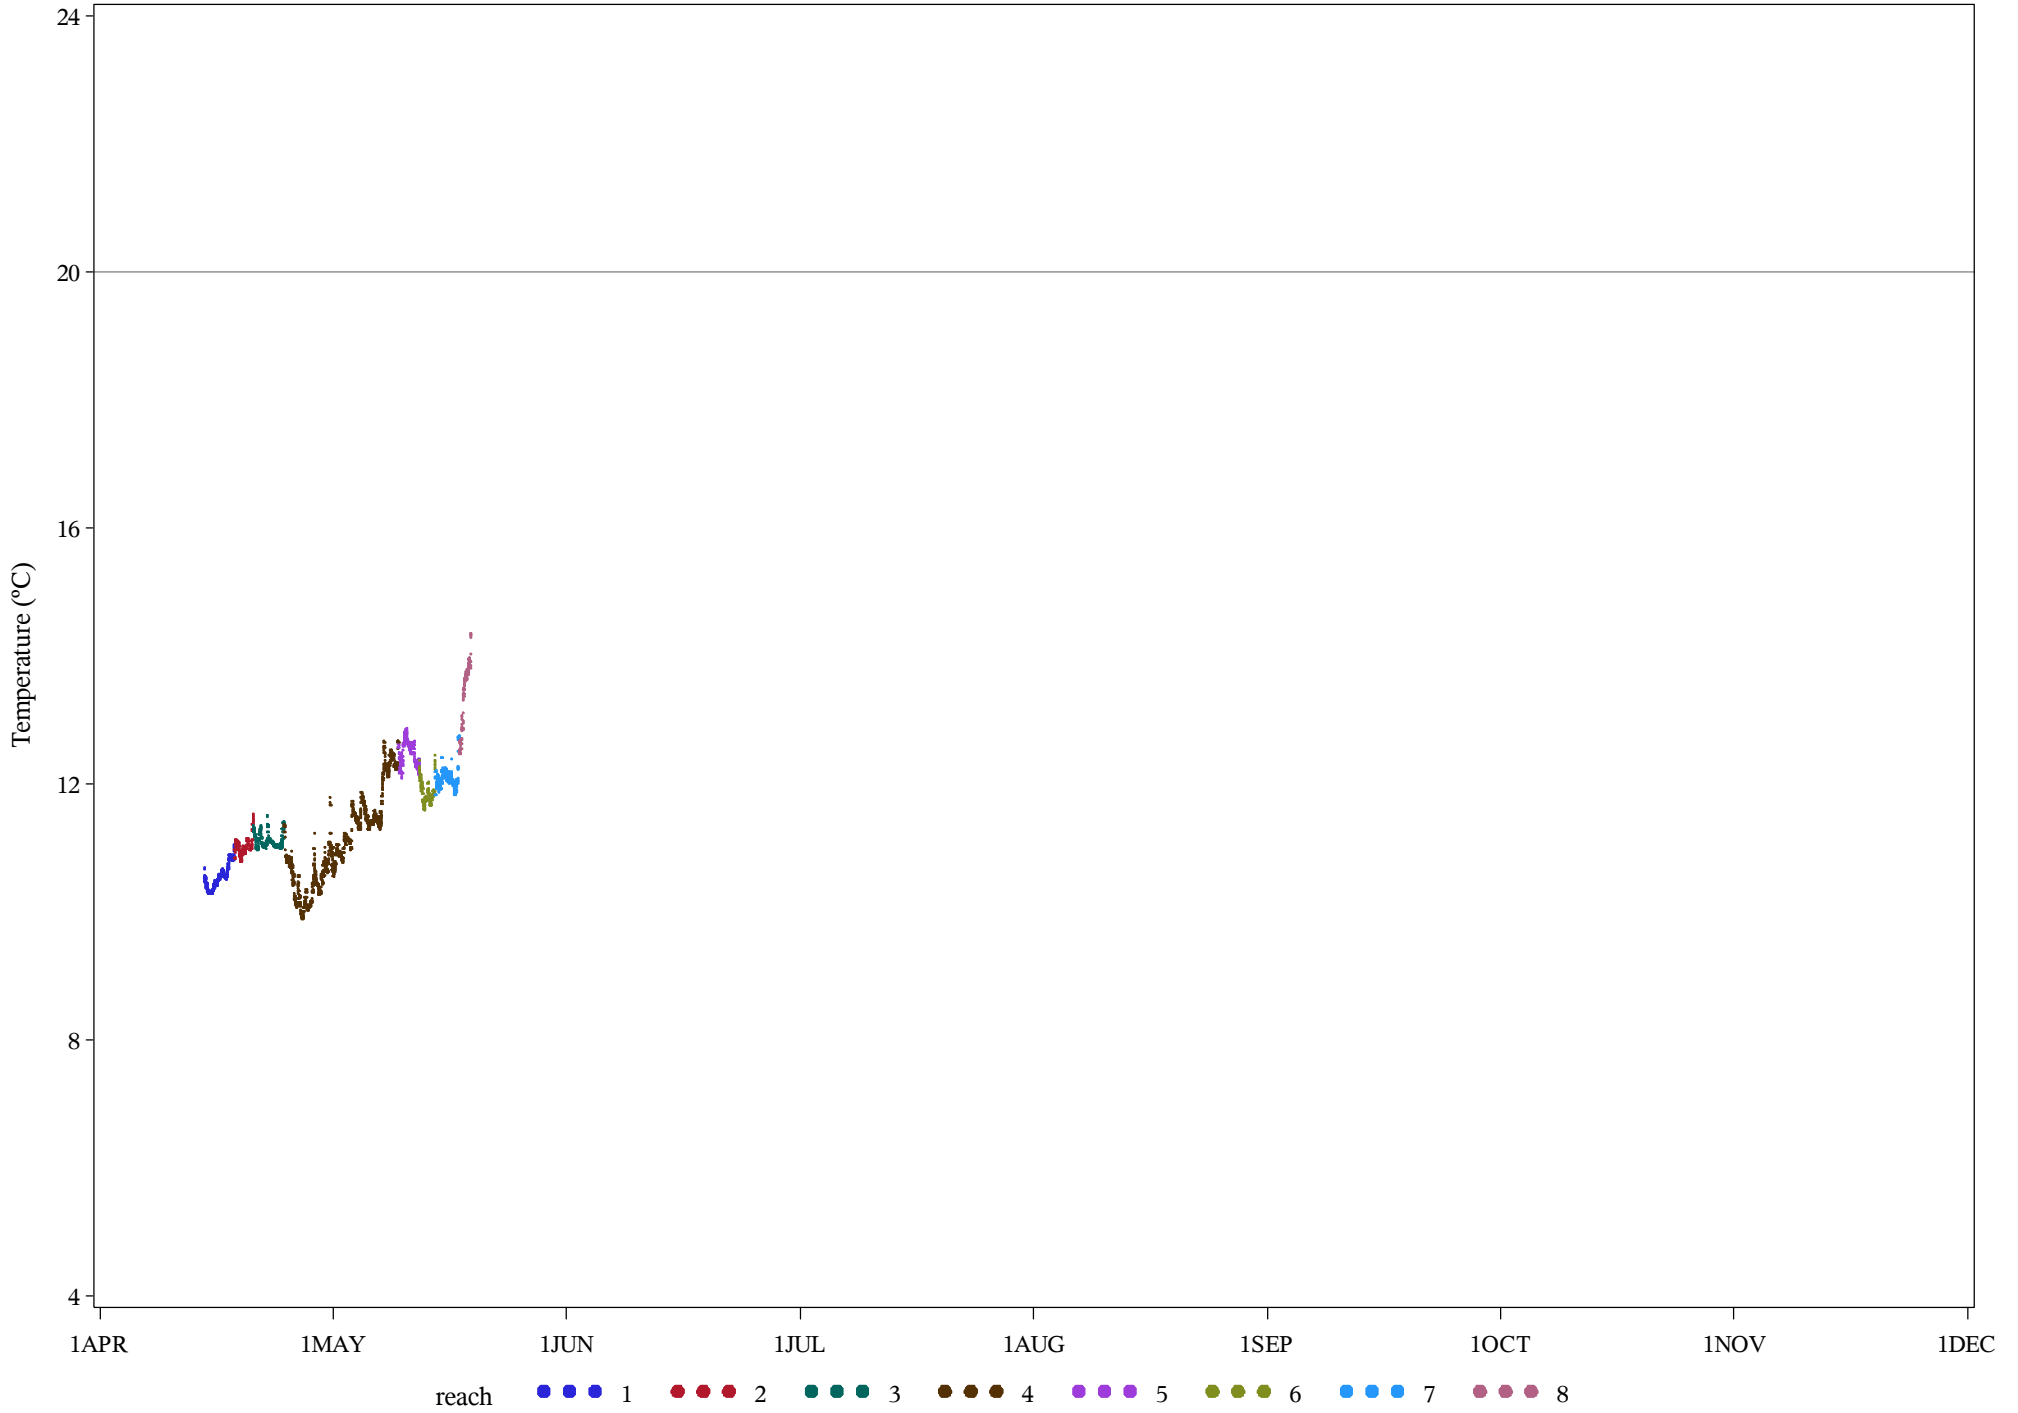

# Spring Chinook 3056A

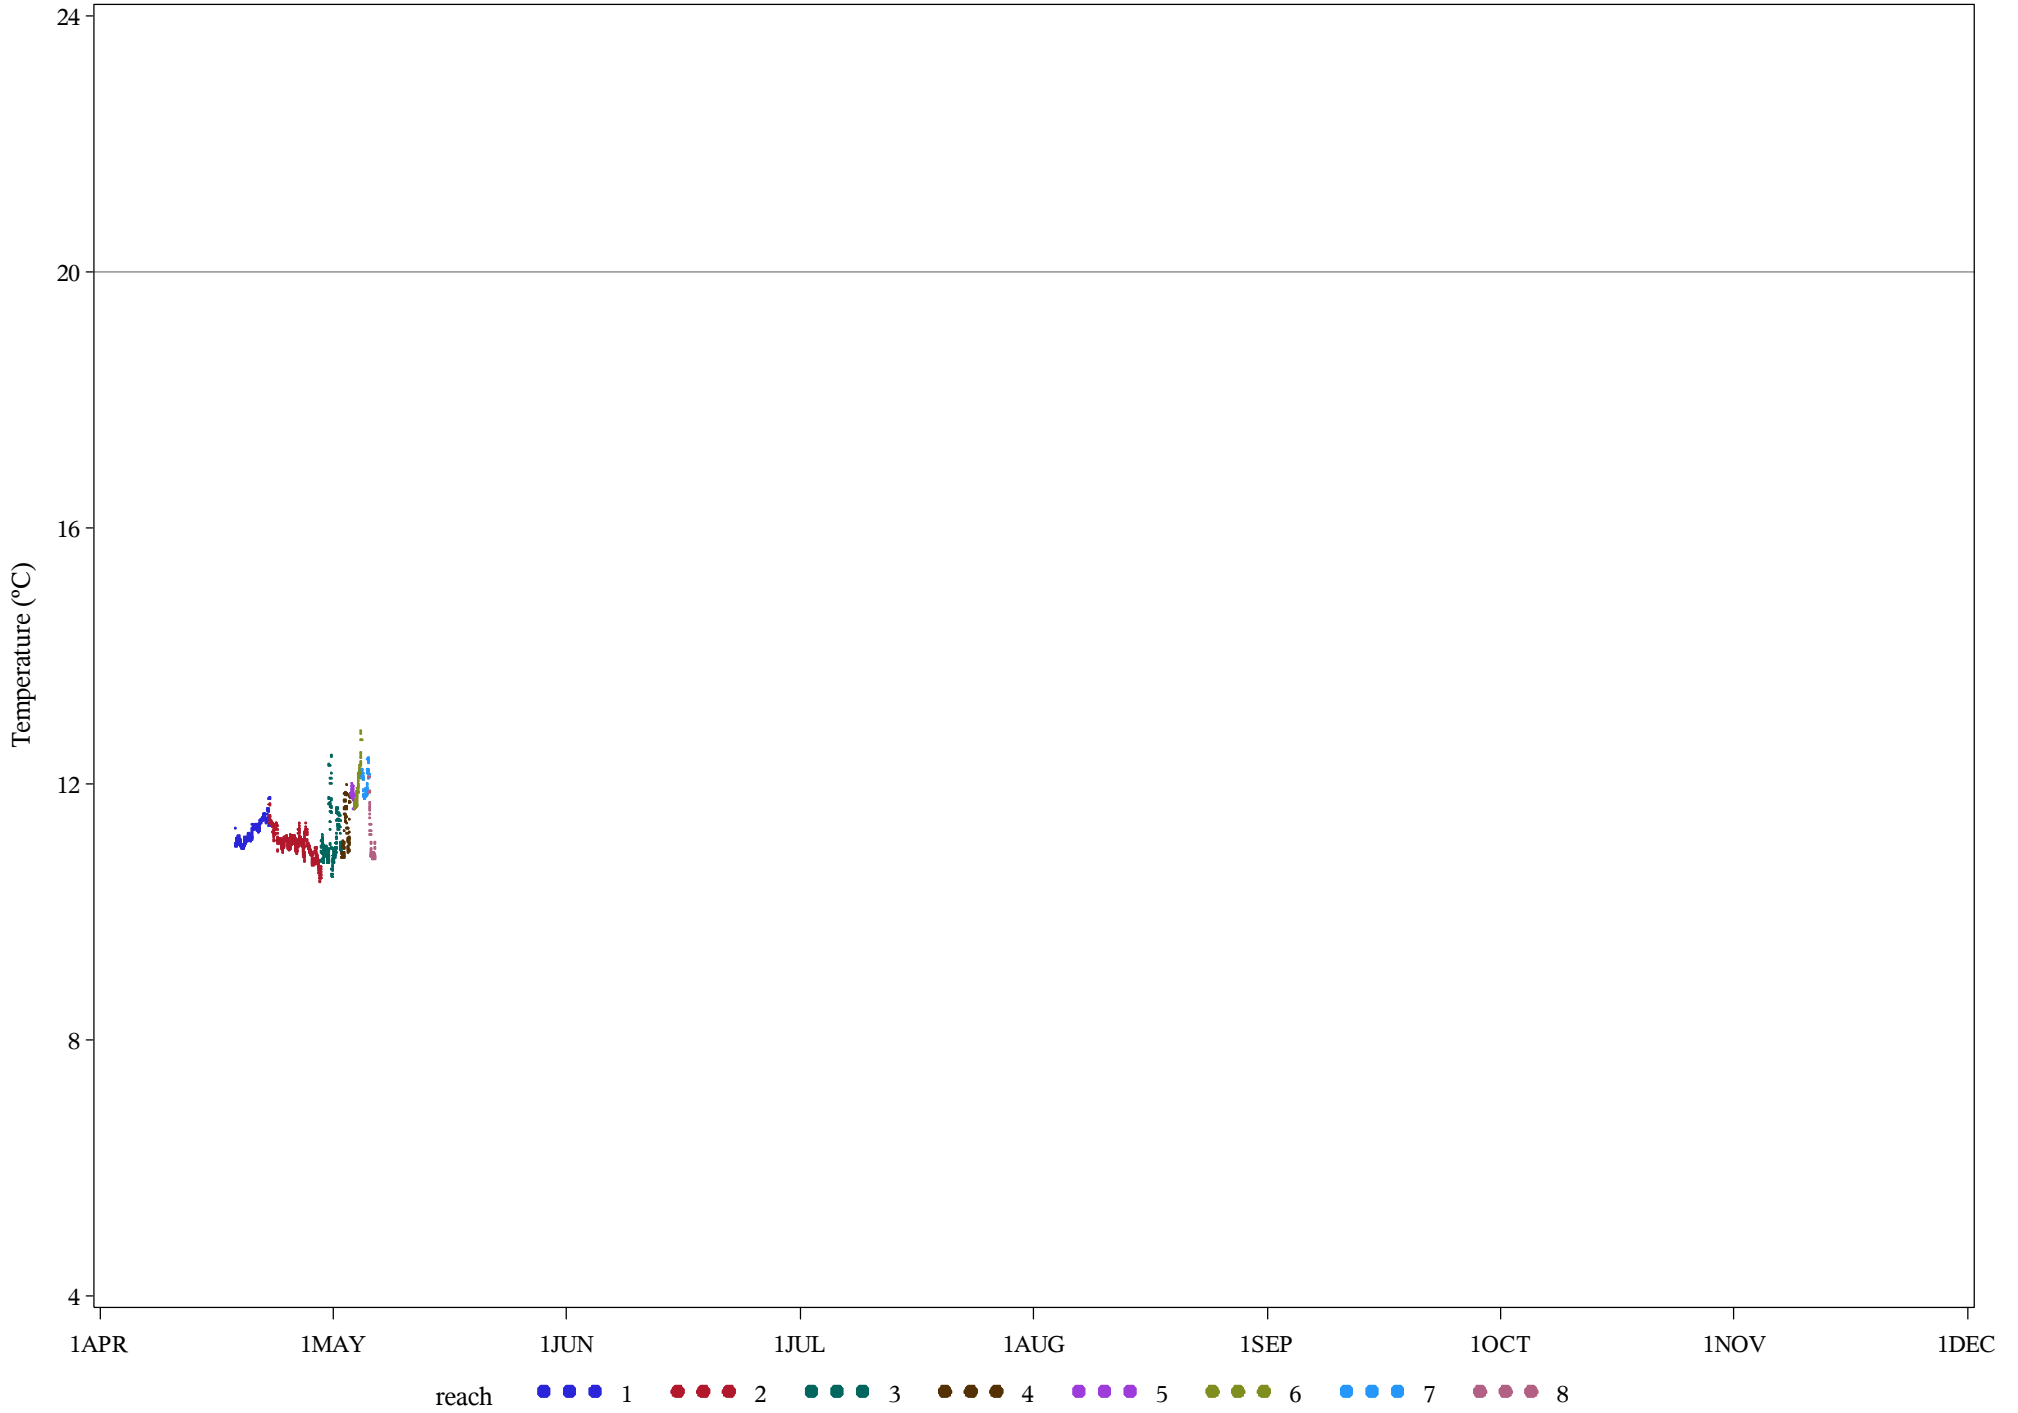



# Spring Chinook 3058A

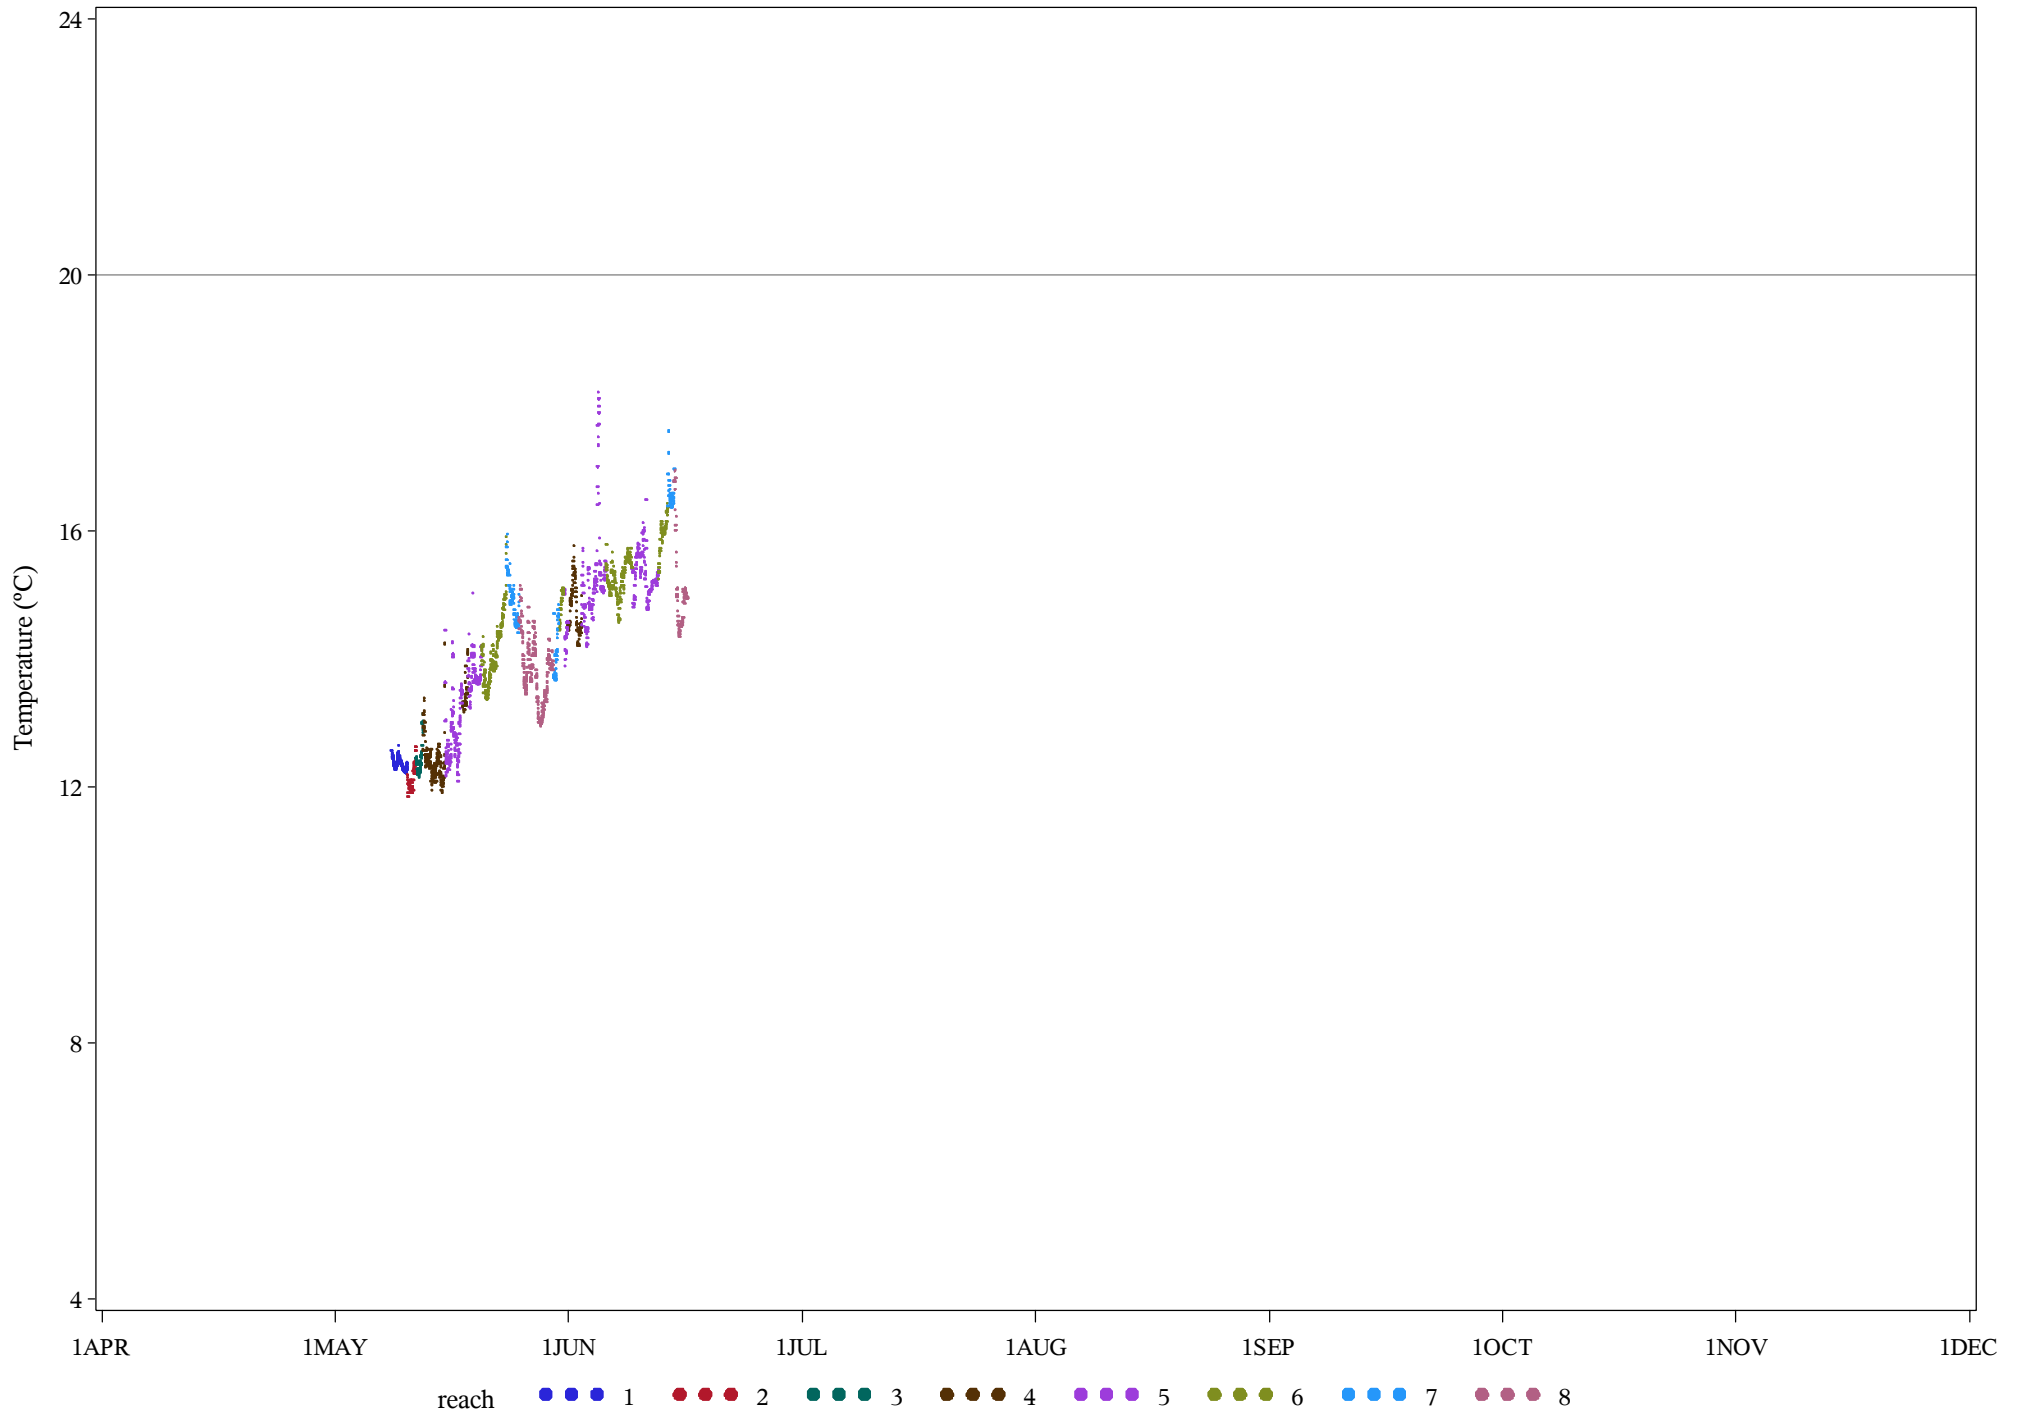



# Spring Chinook 3063A

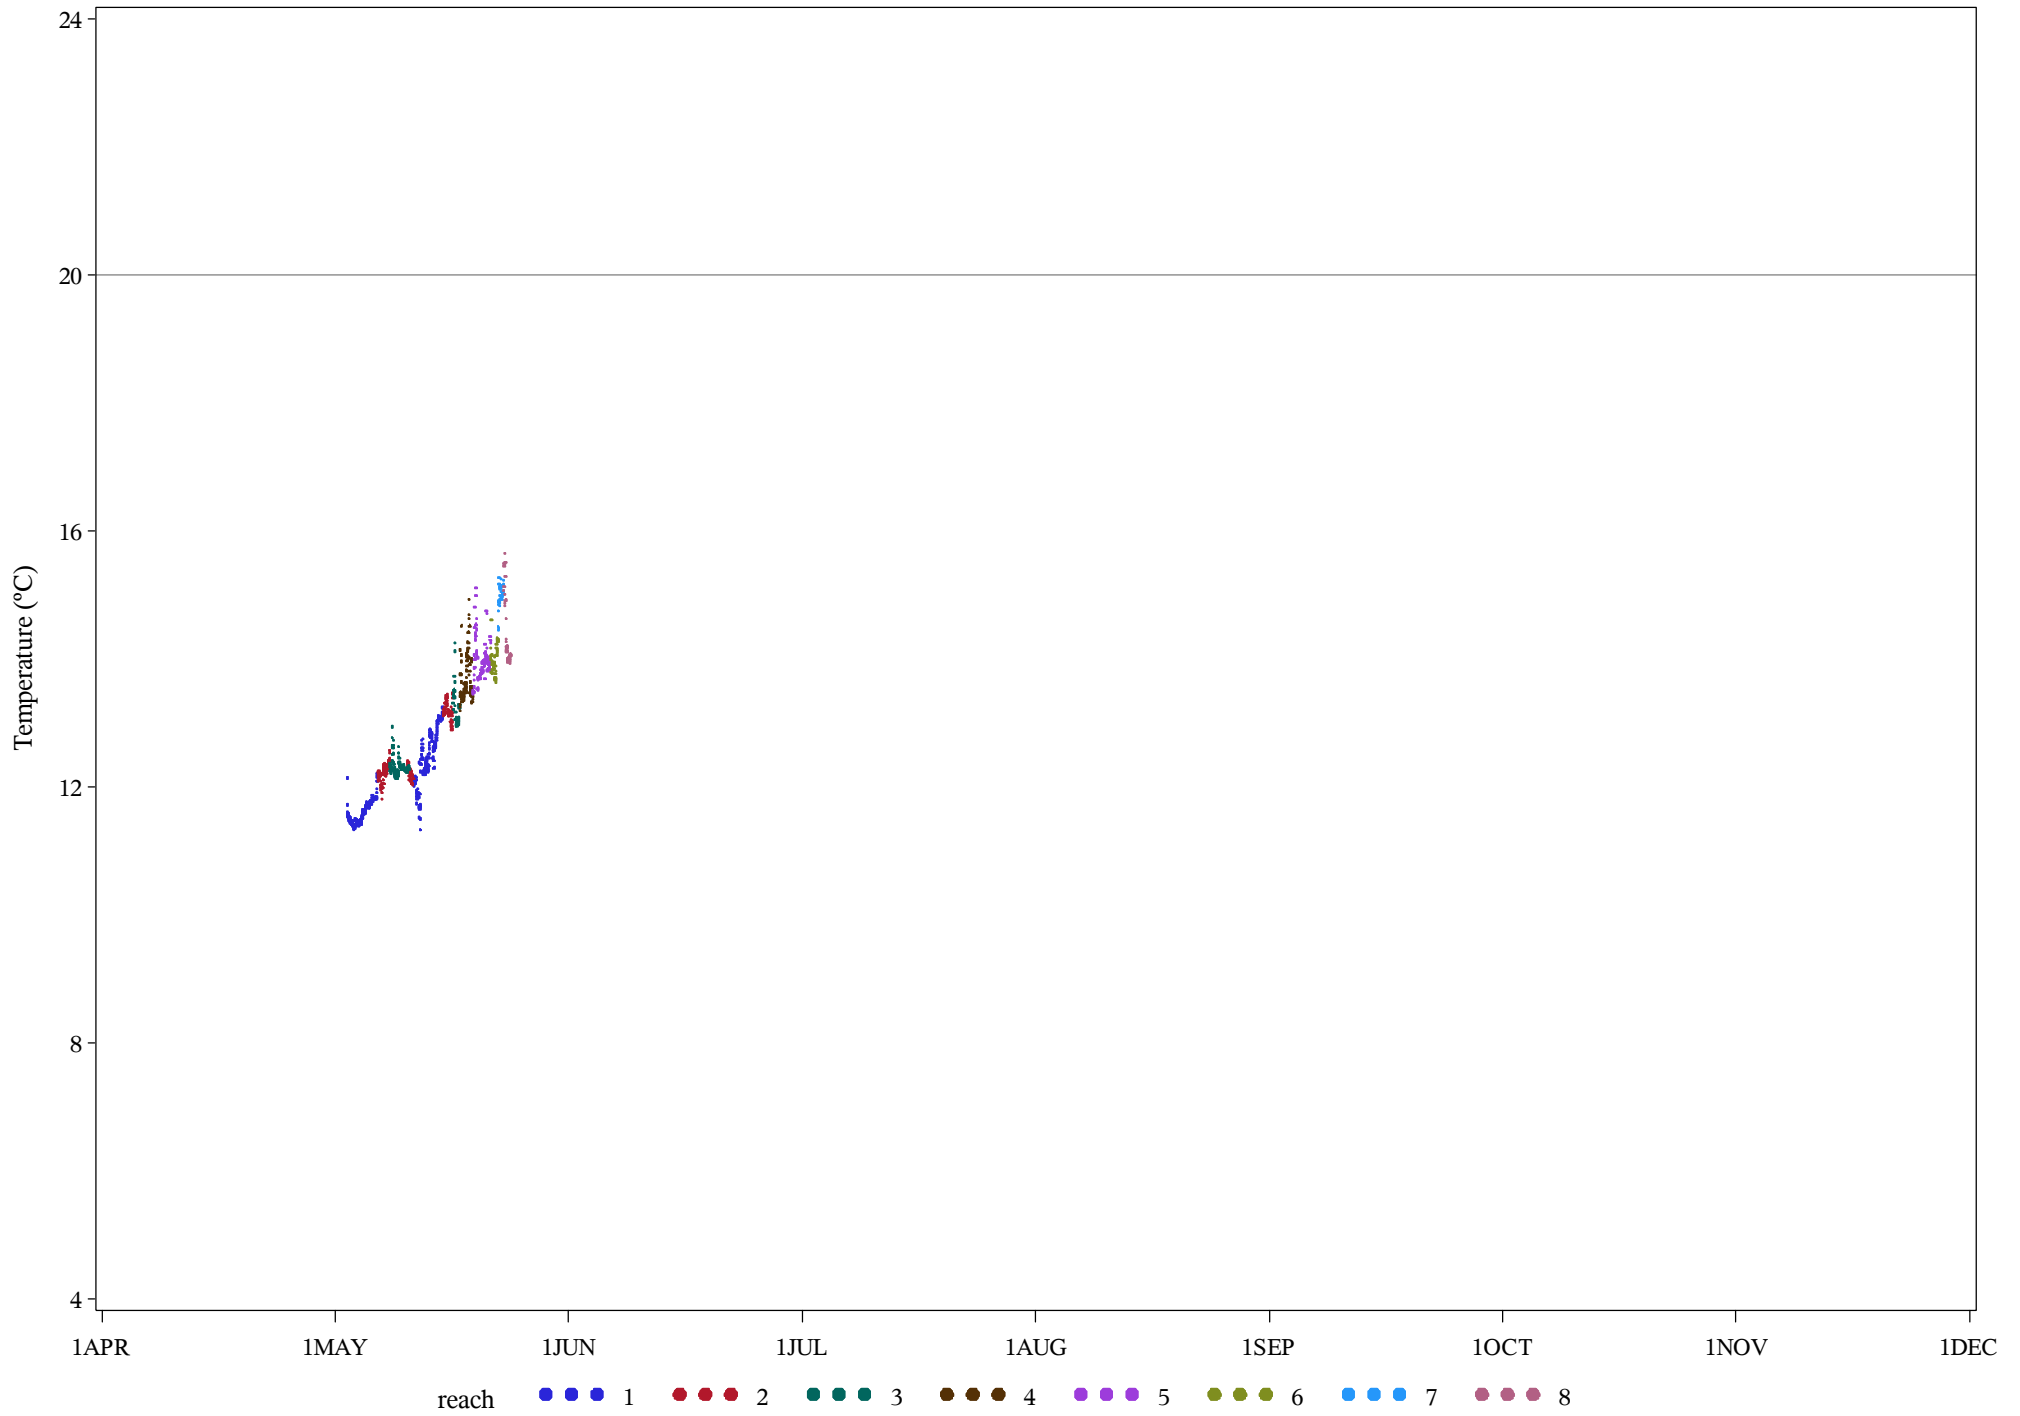

# Spring Chinook 3069A

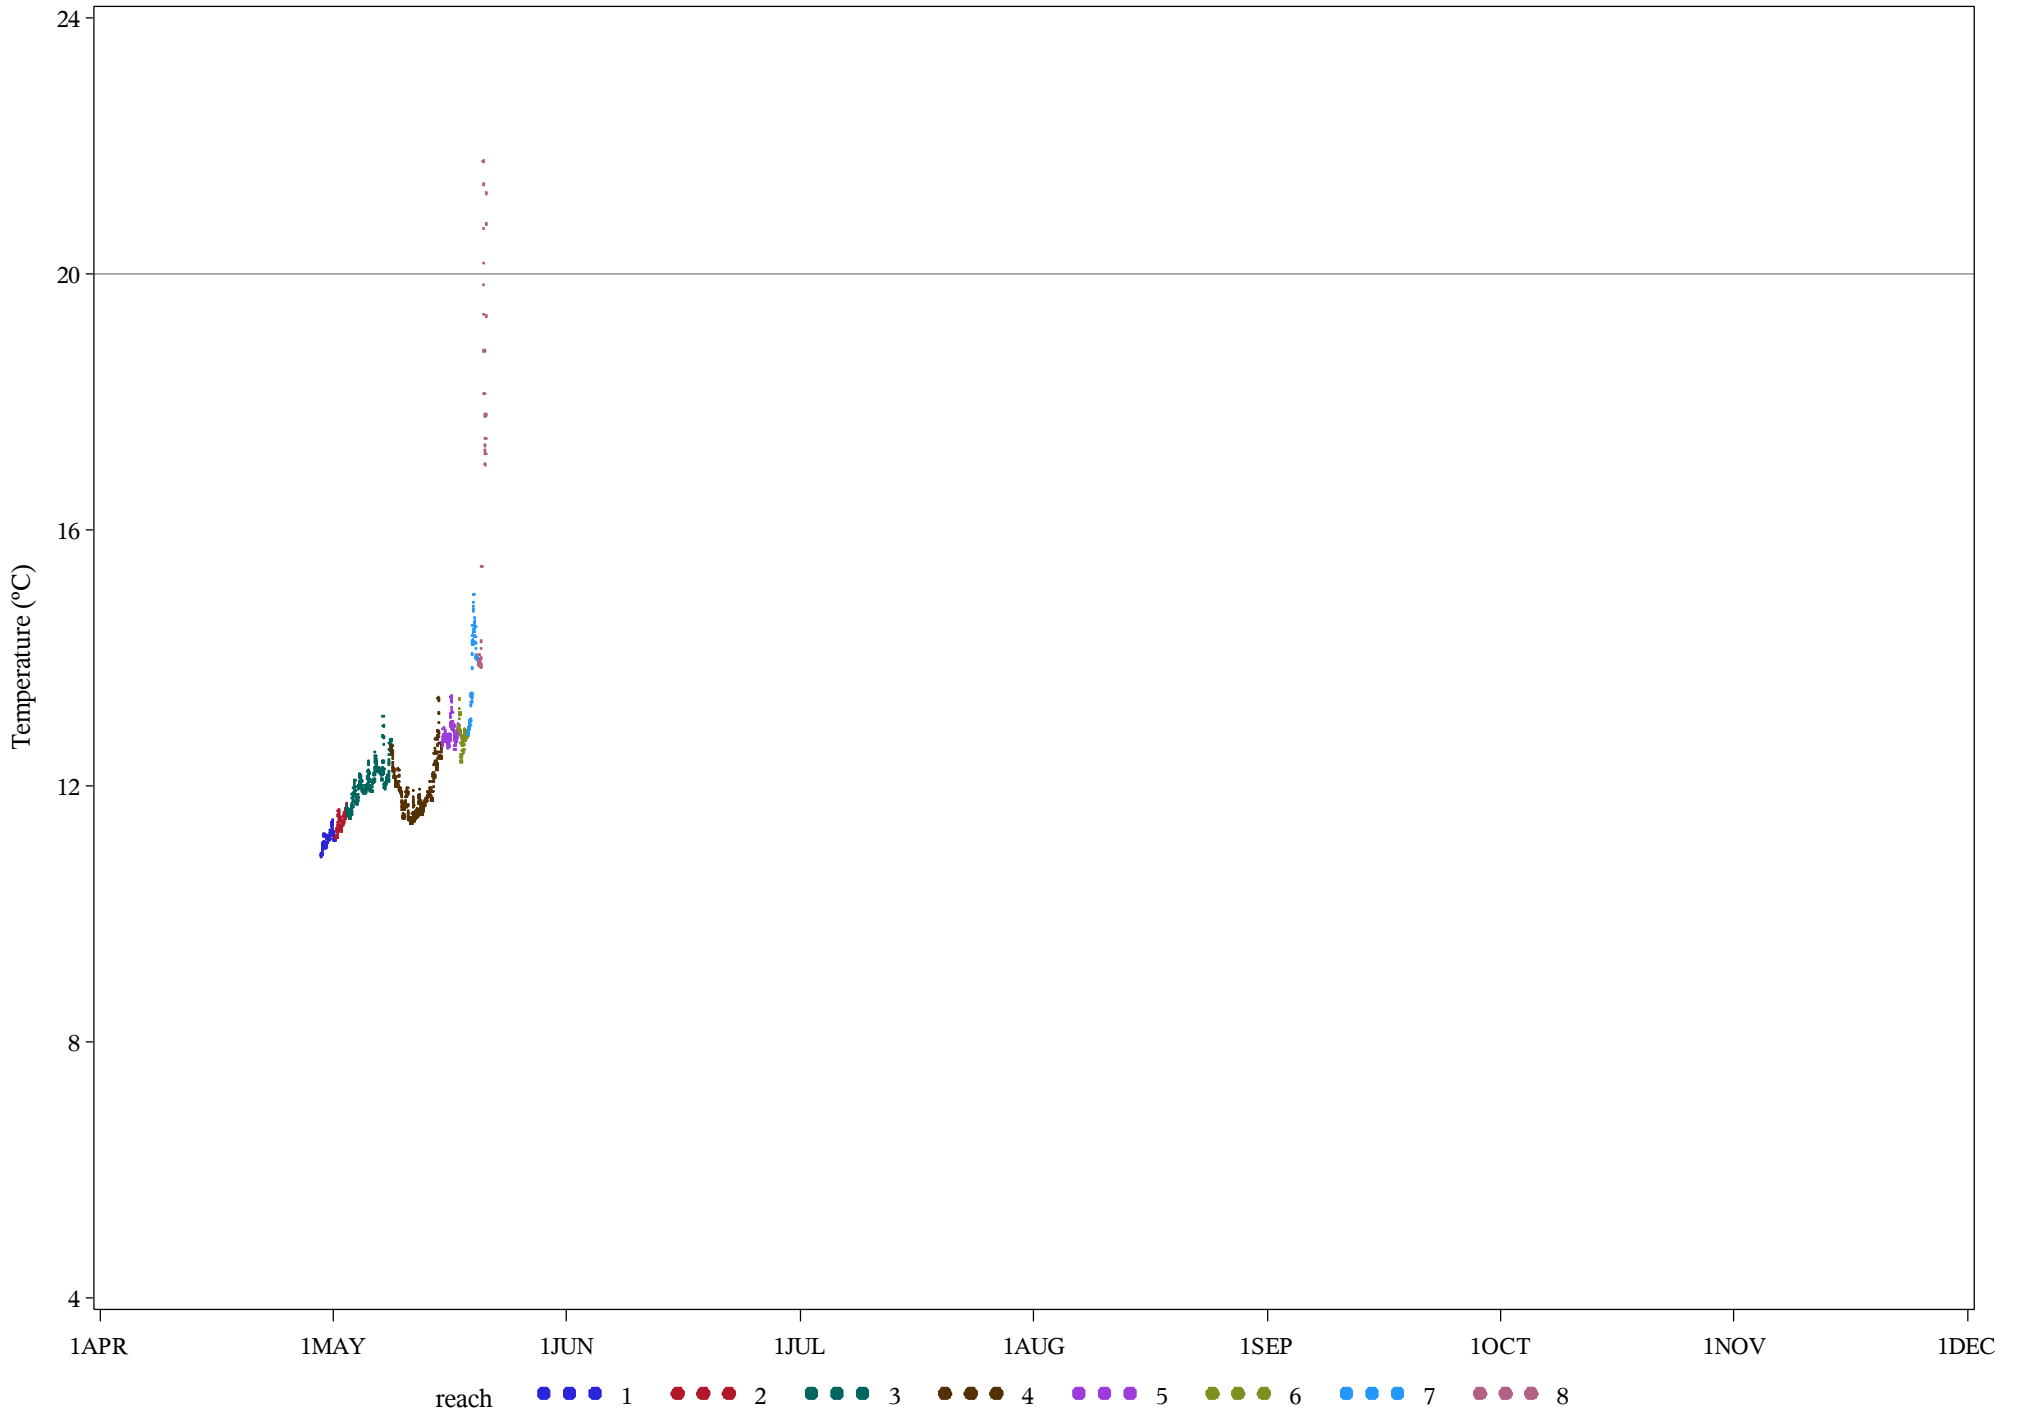

# Spring Chinook 3072A

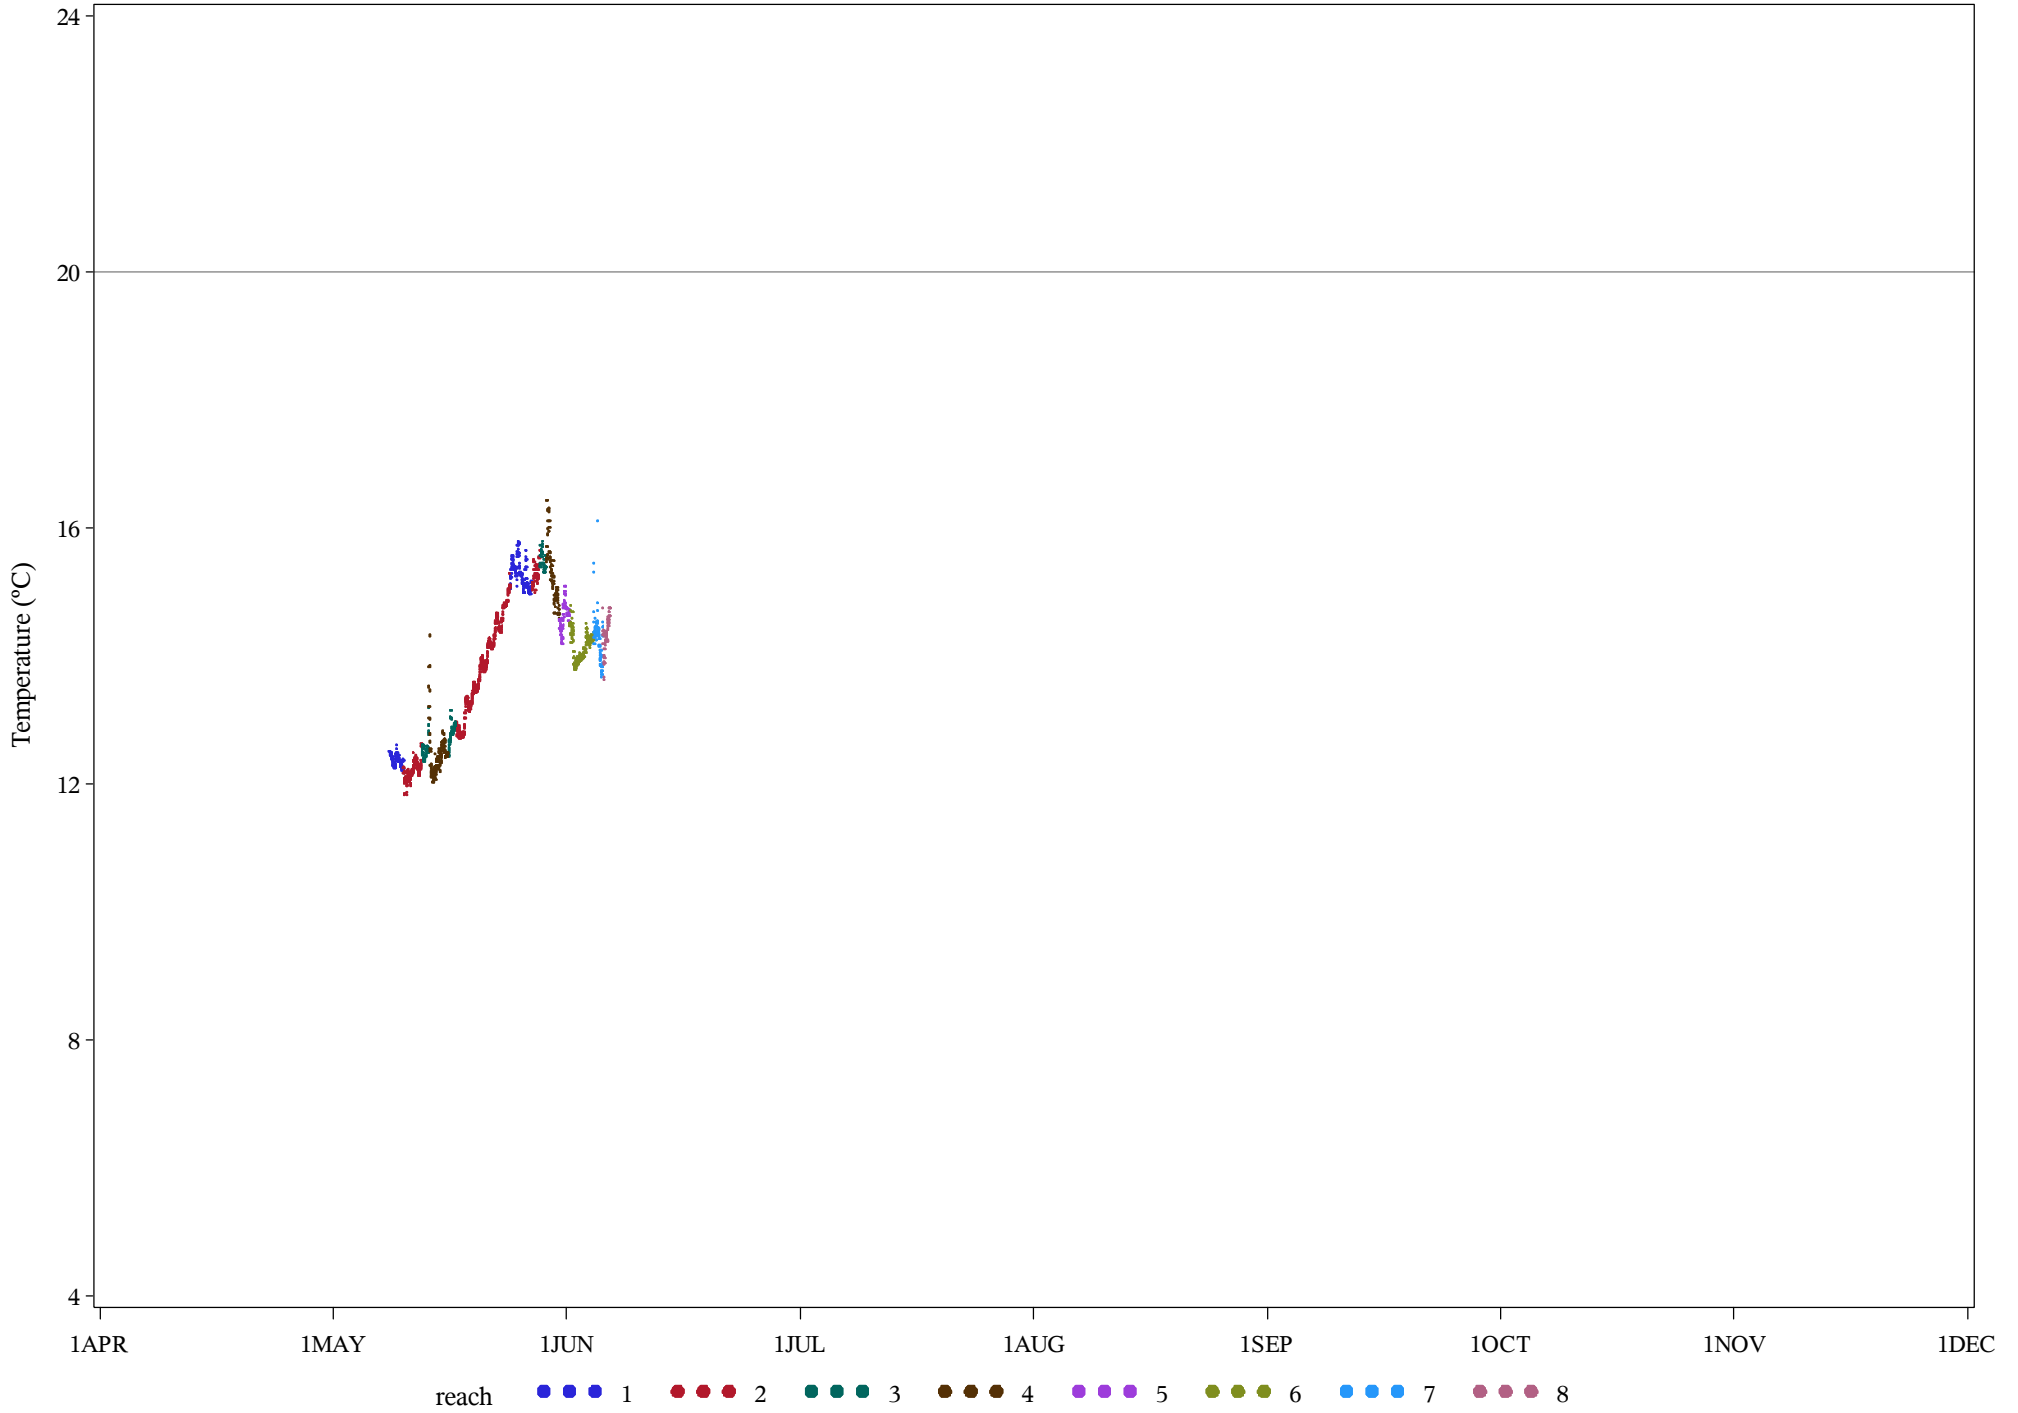



# Spring Chinook 3076A

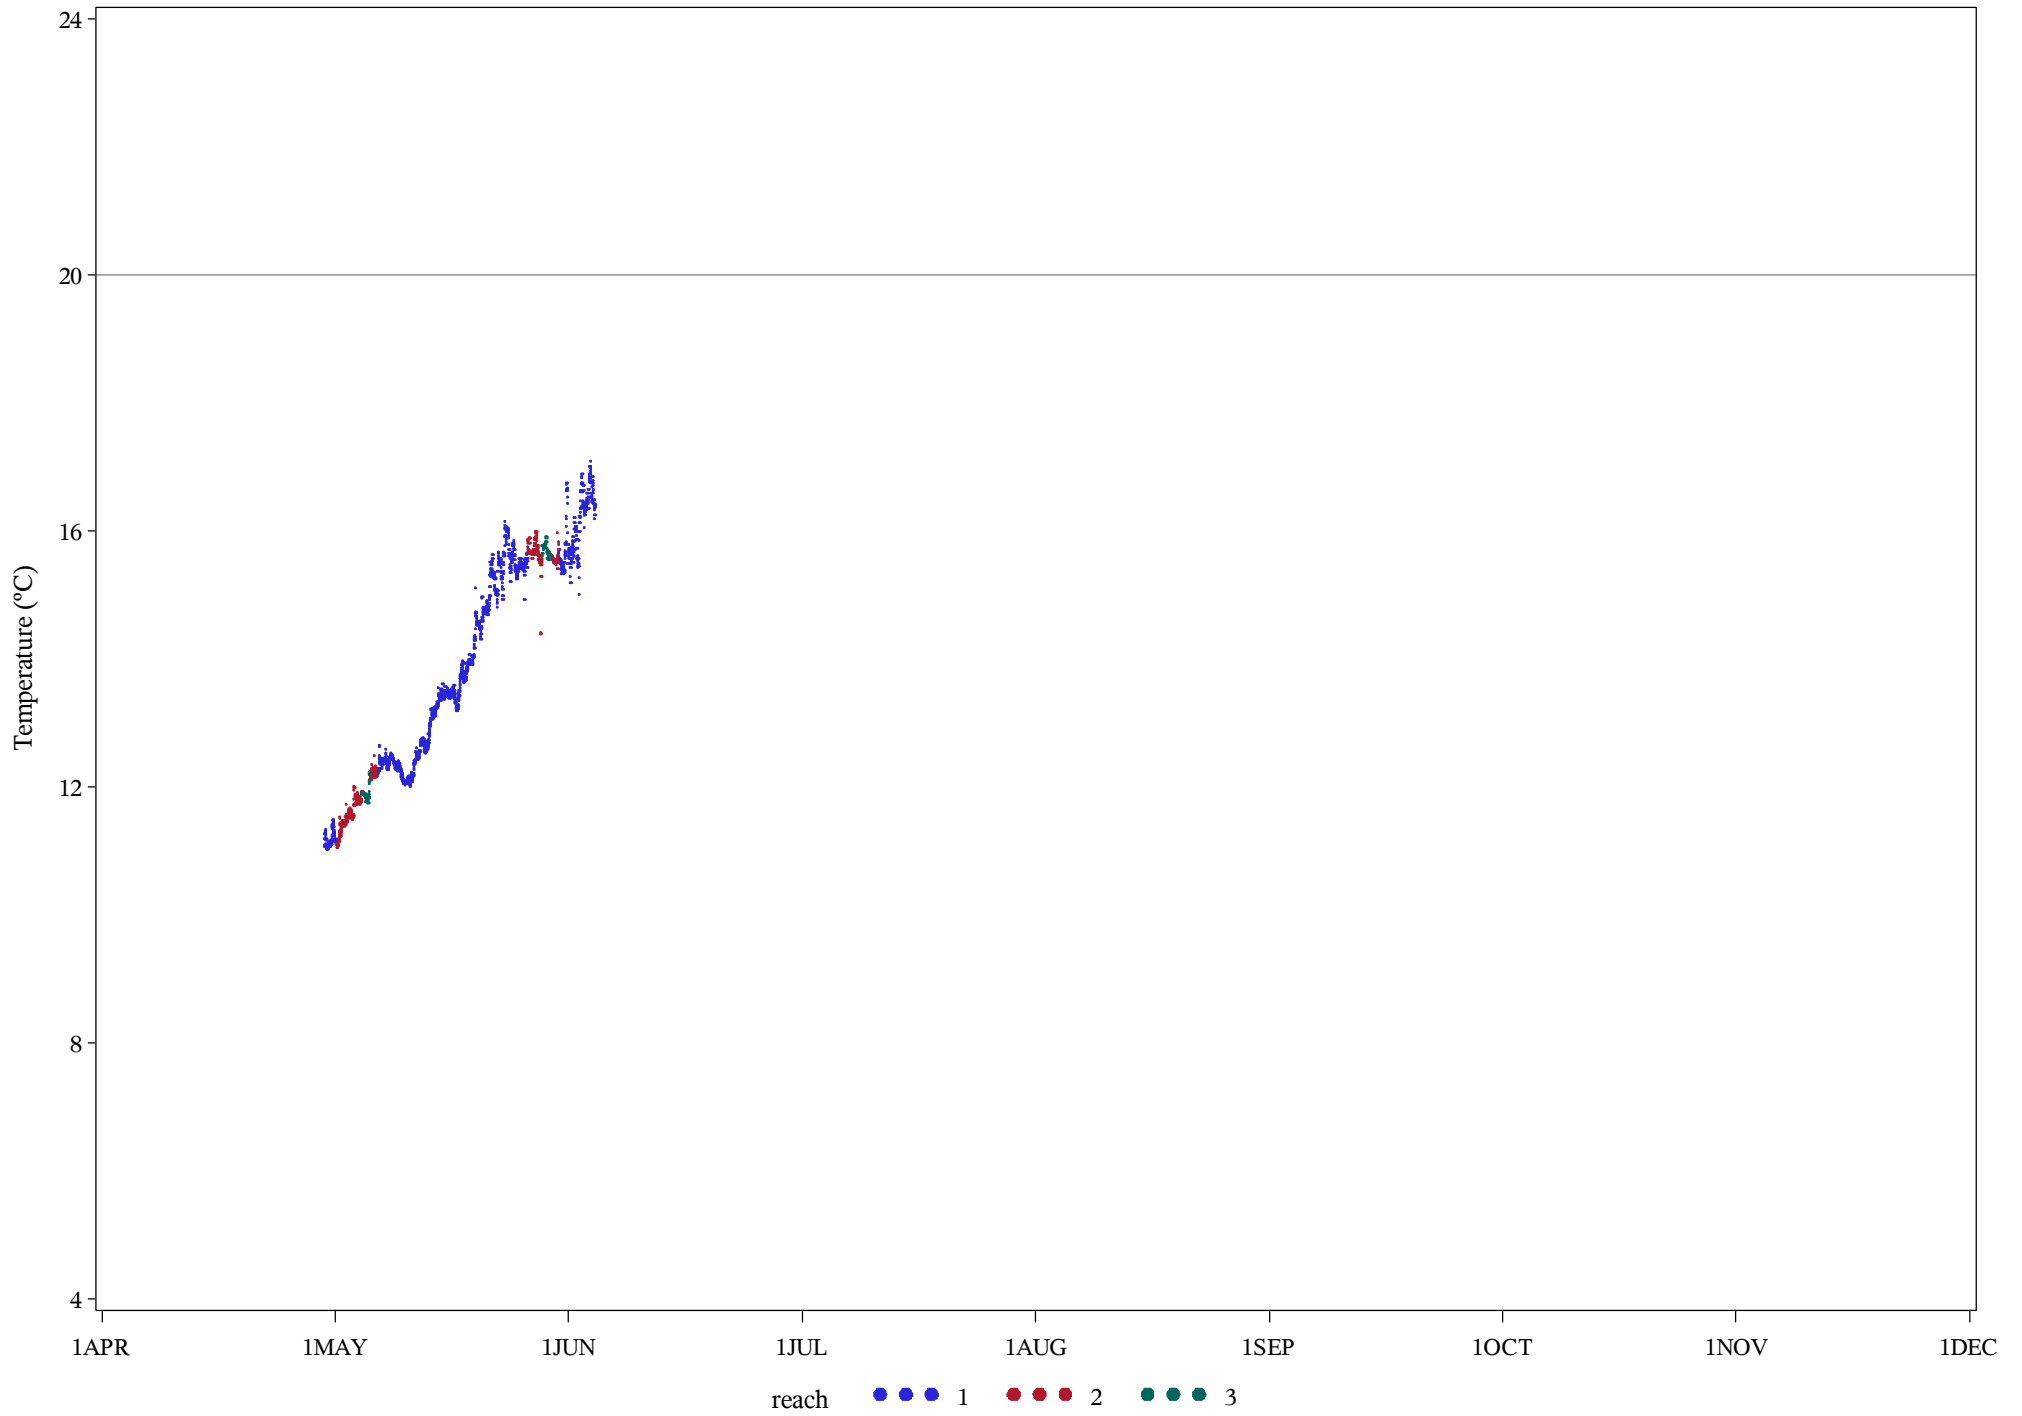

# Spring Chinook 3081A

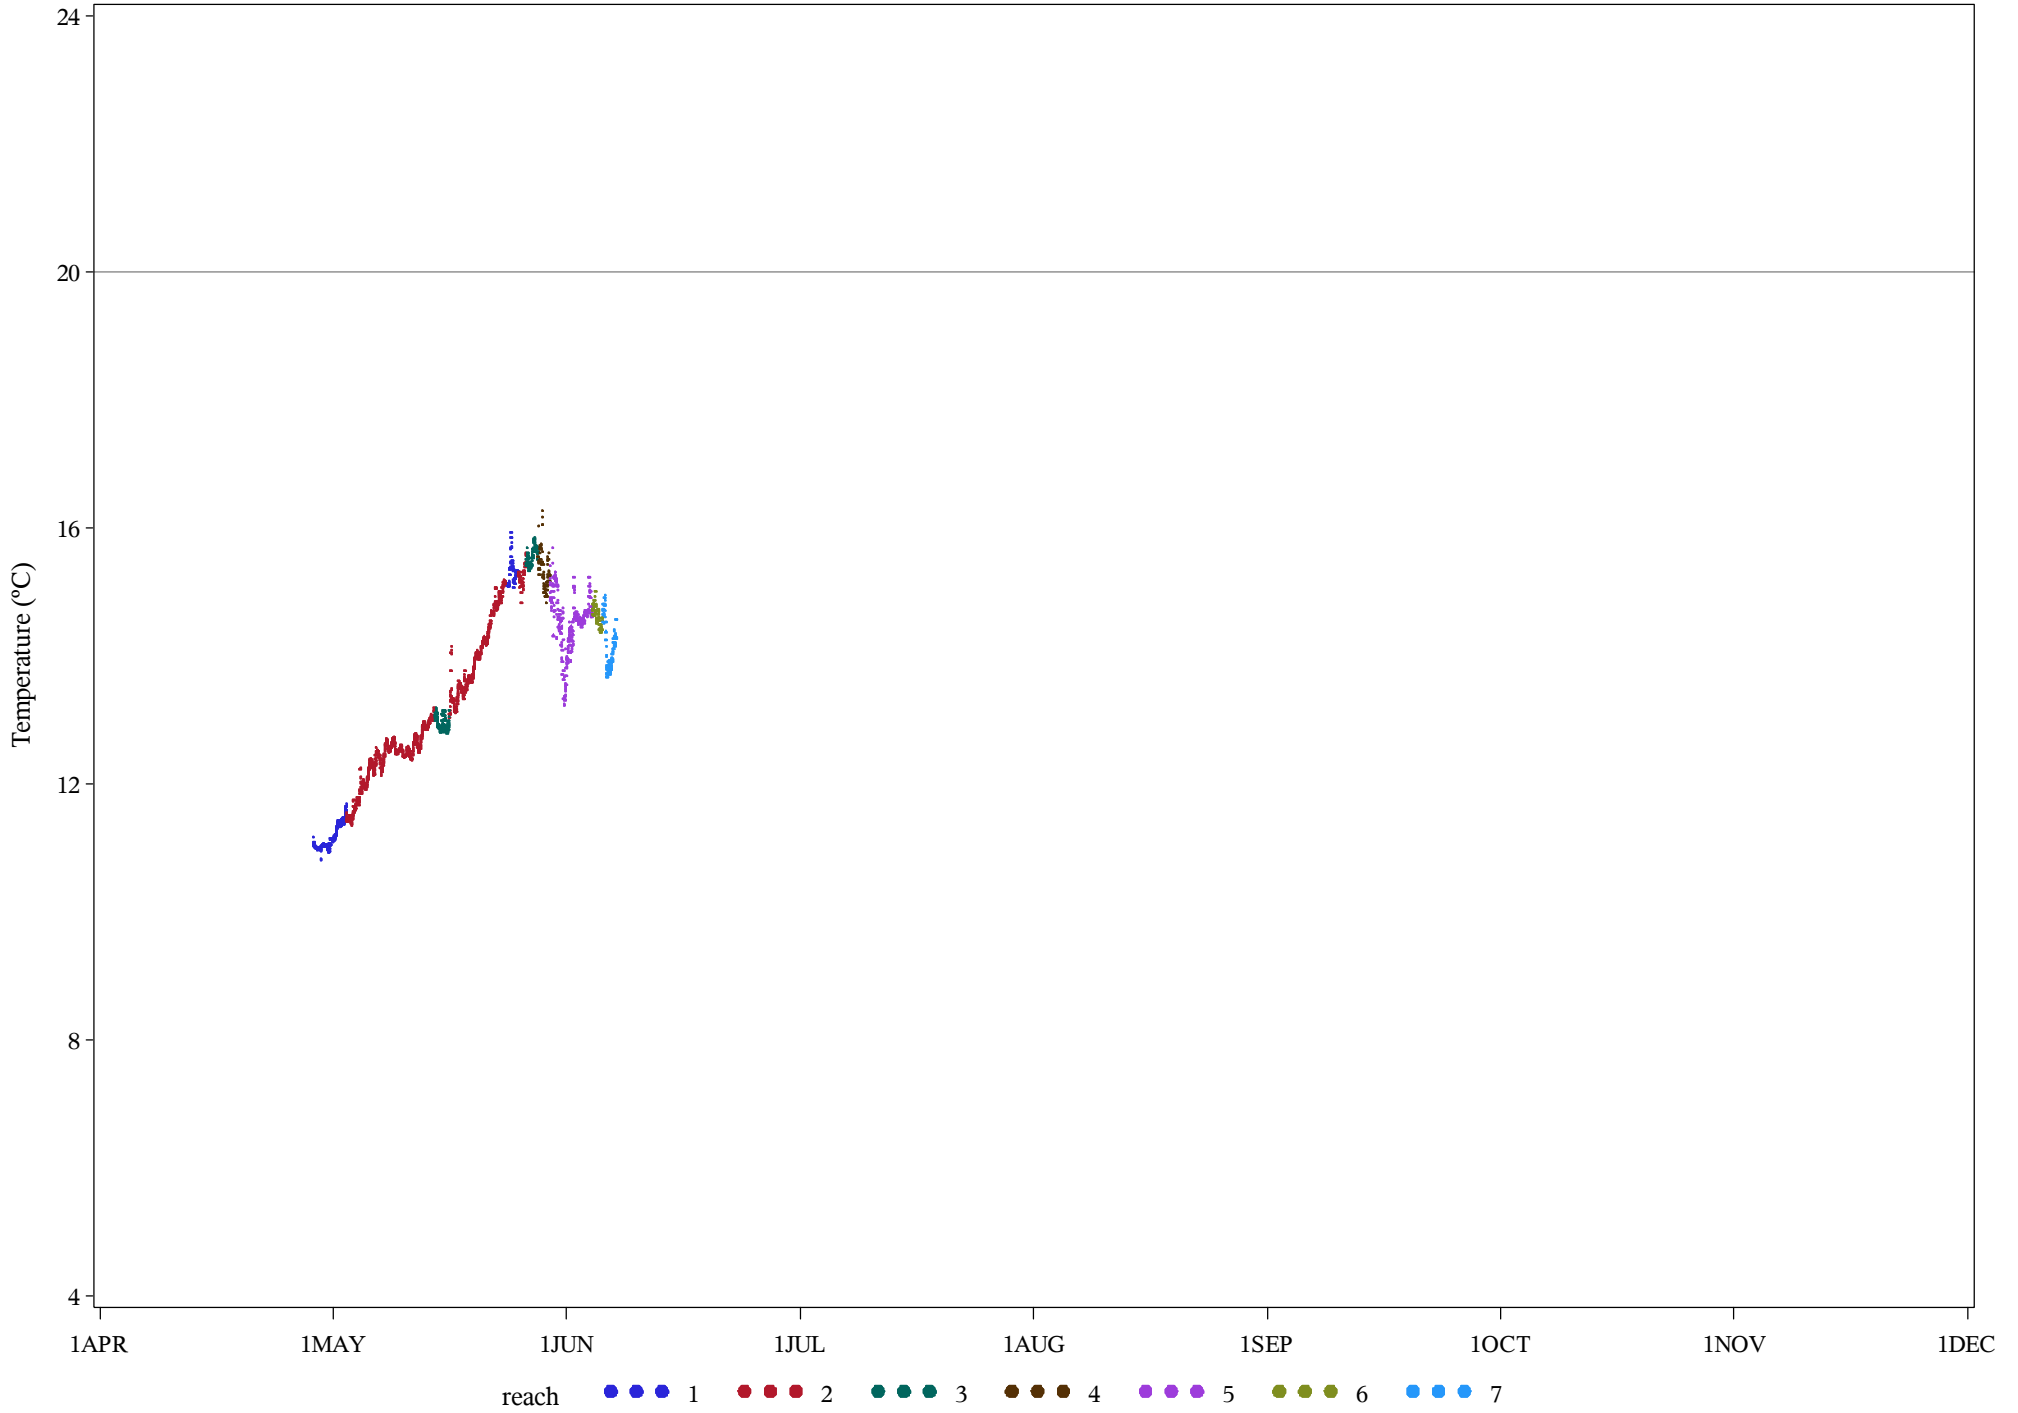

# Spring Chinook 3083A

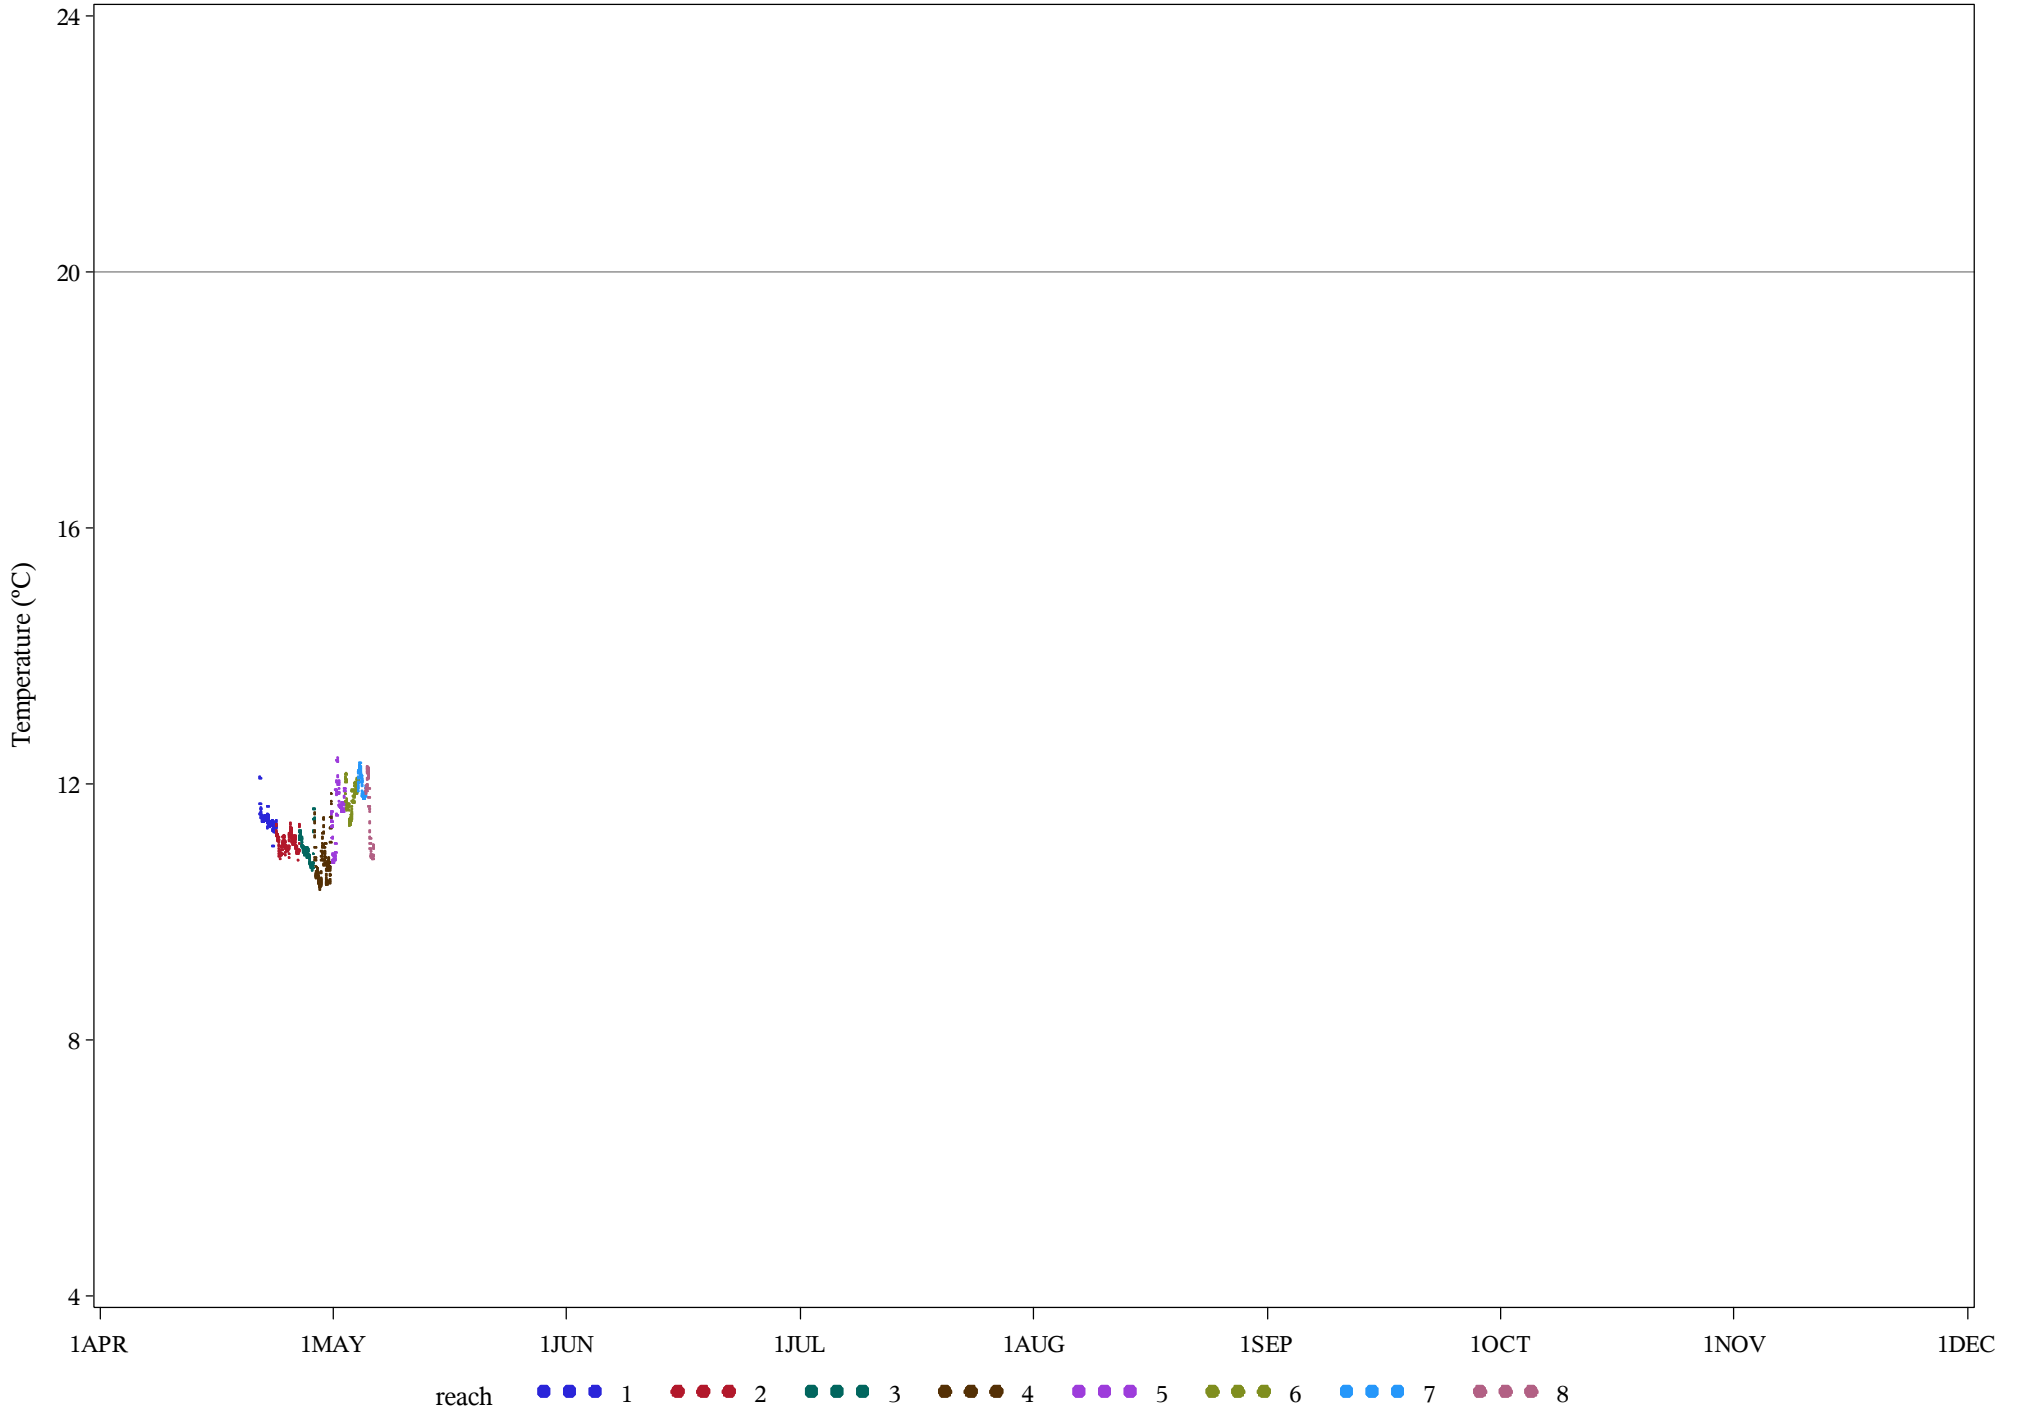





# Spring Chinook 3254A

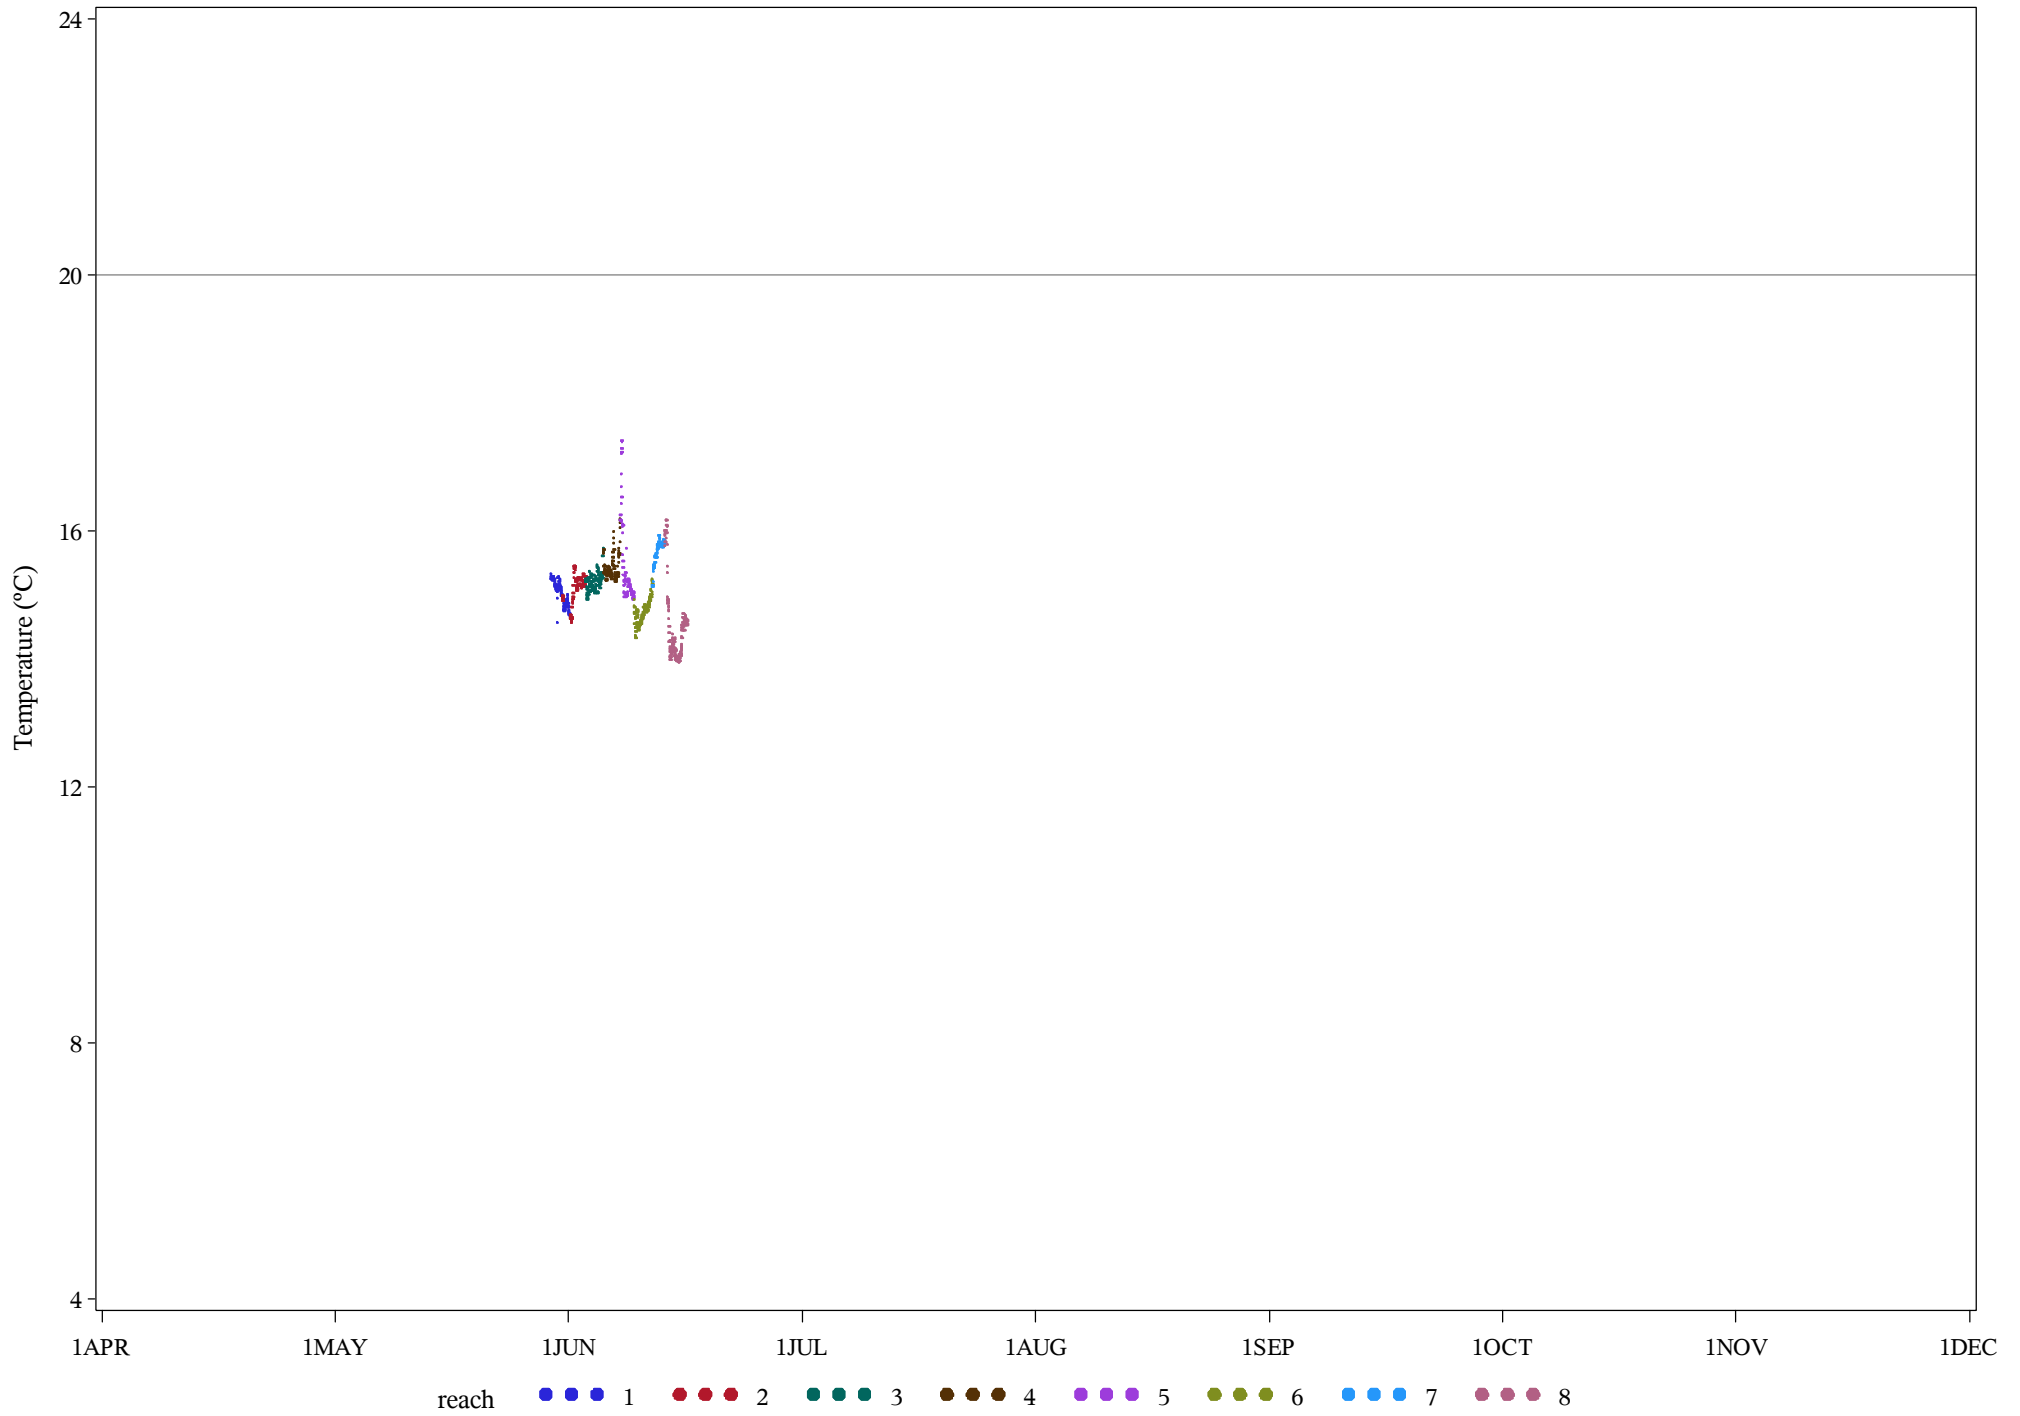

# Spring Chinook 3536A

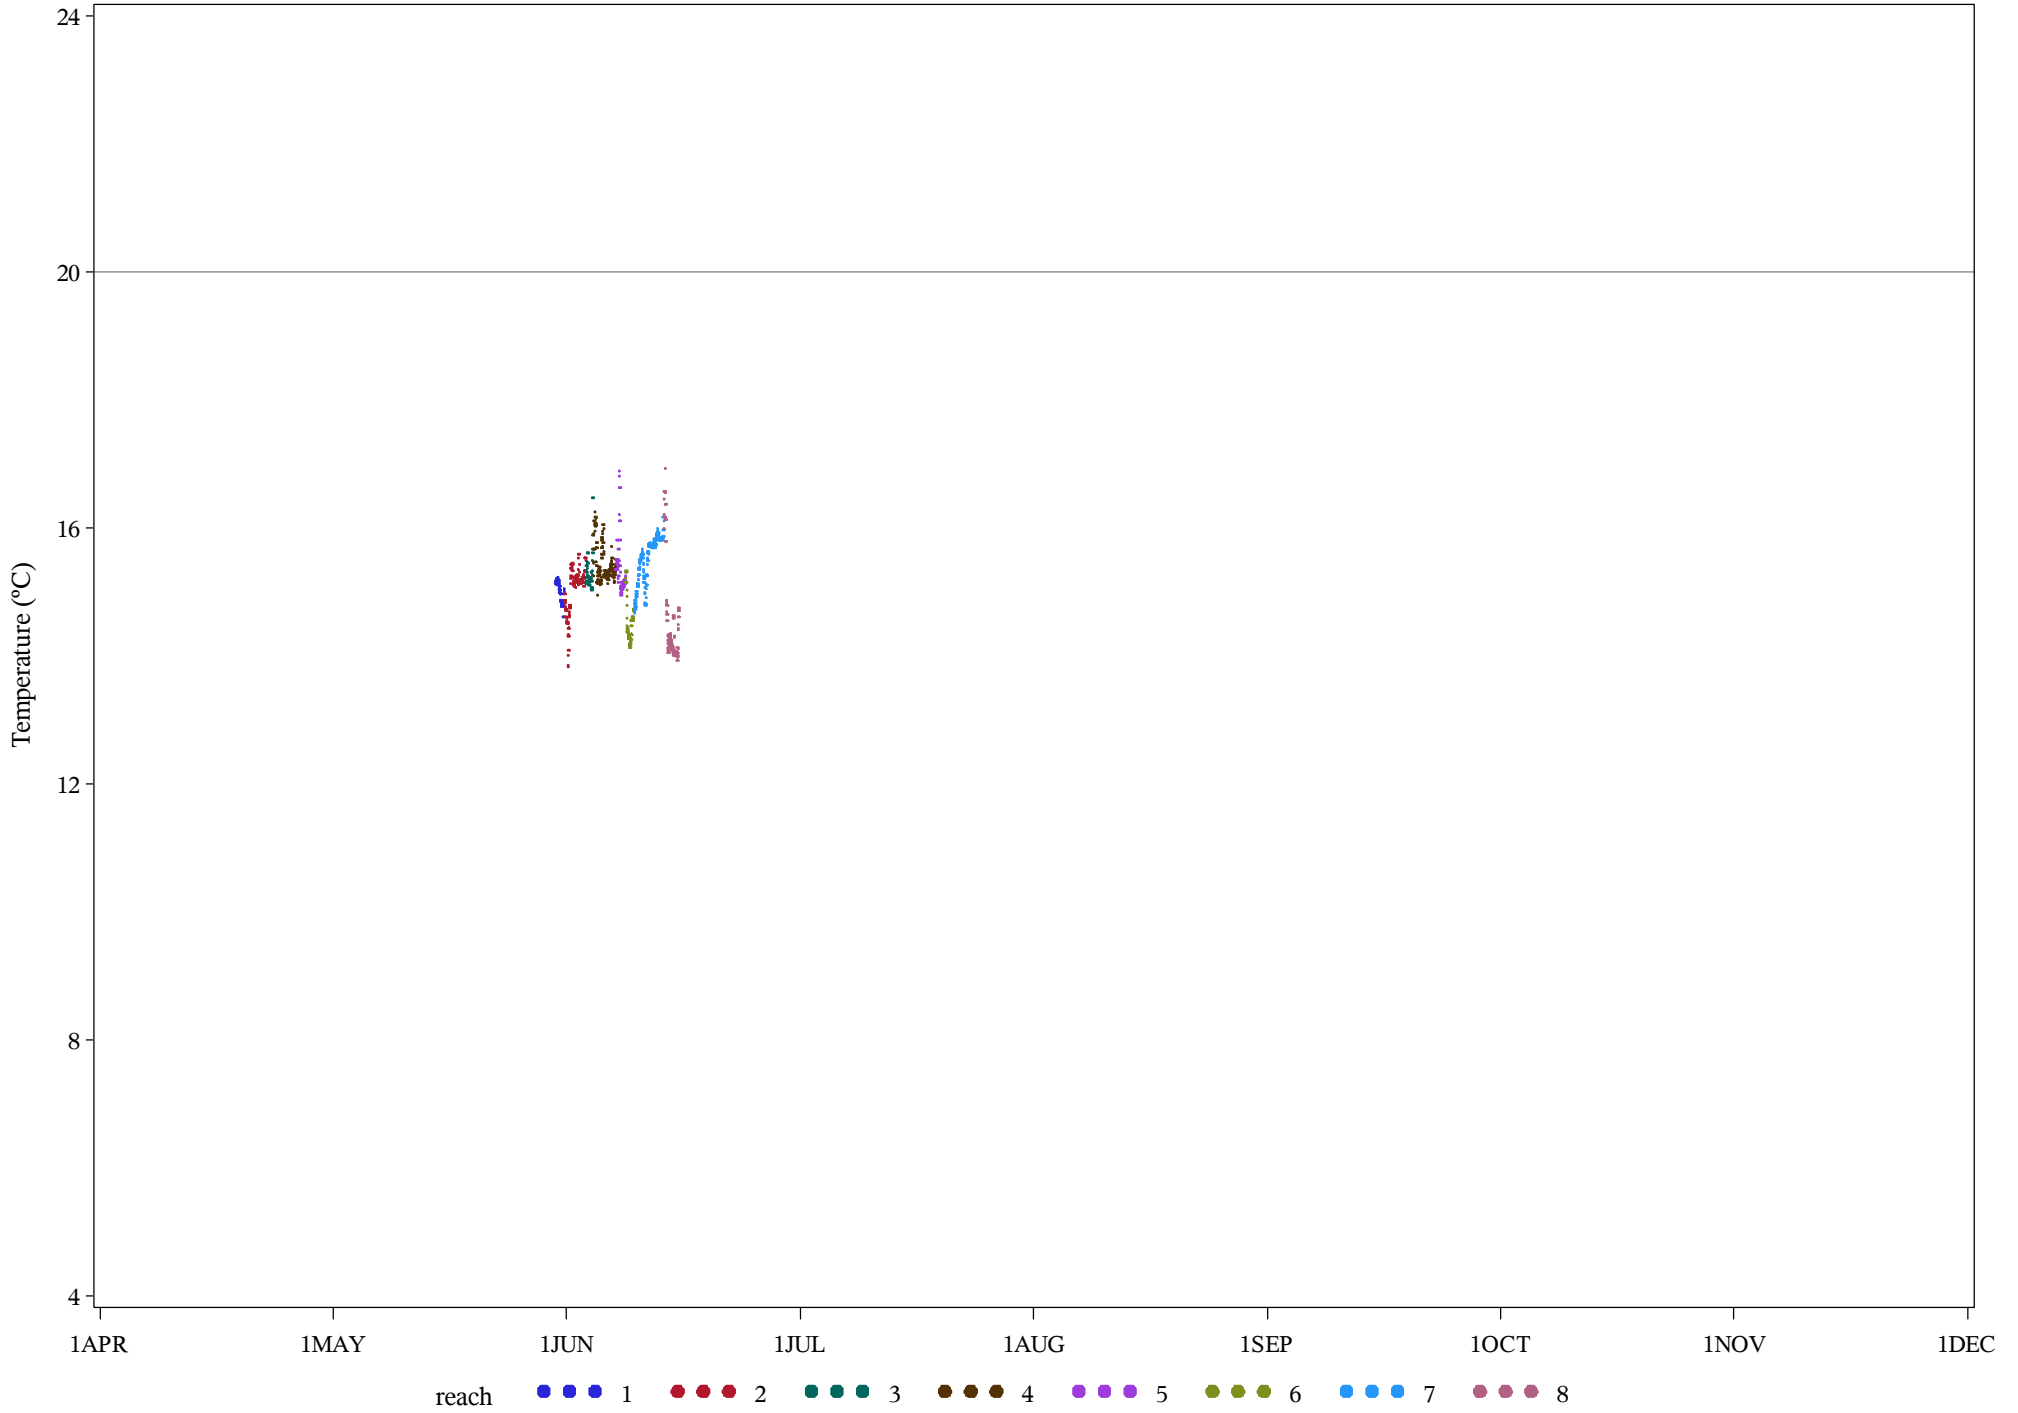

# Spring Chinook 3563A

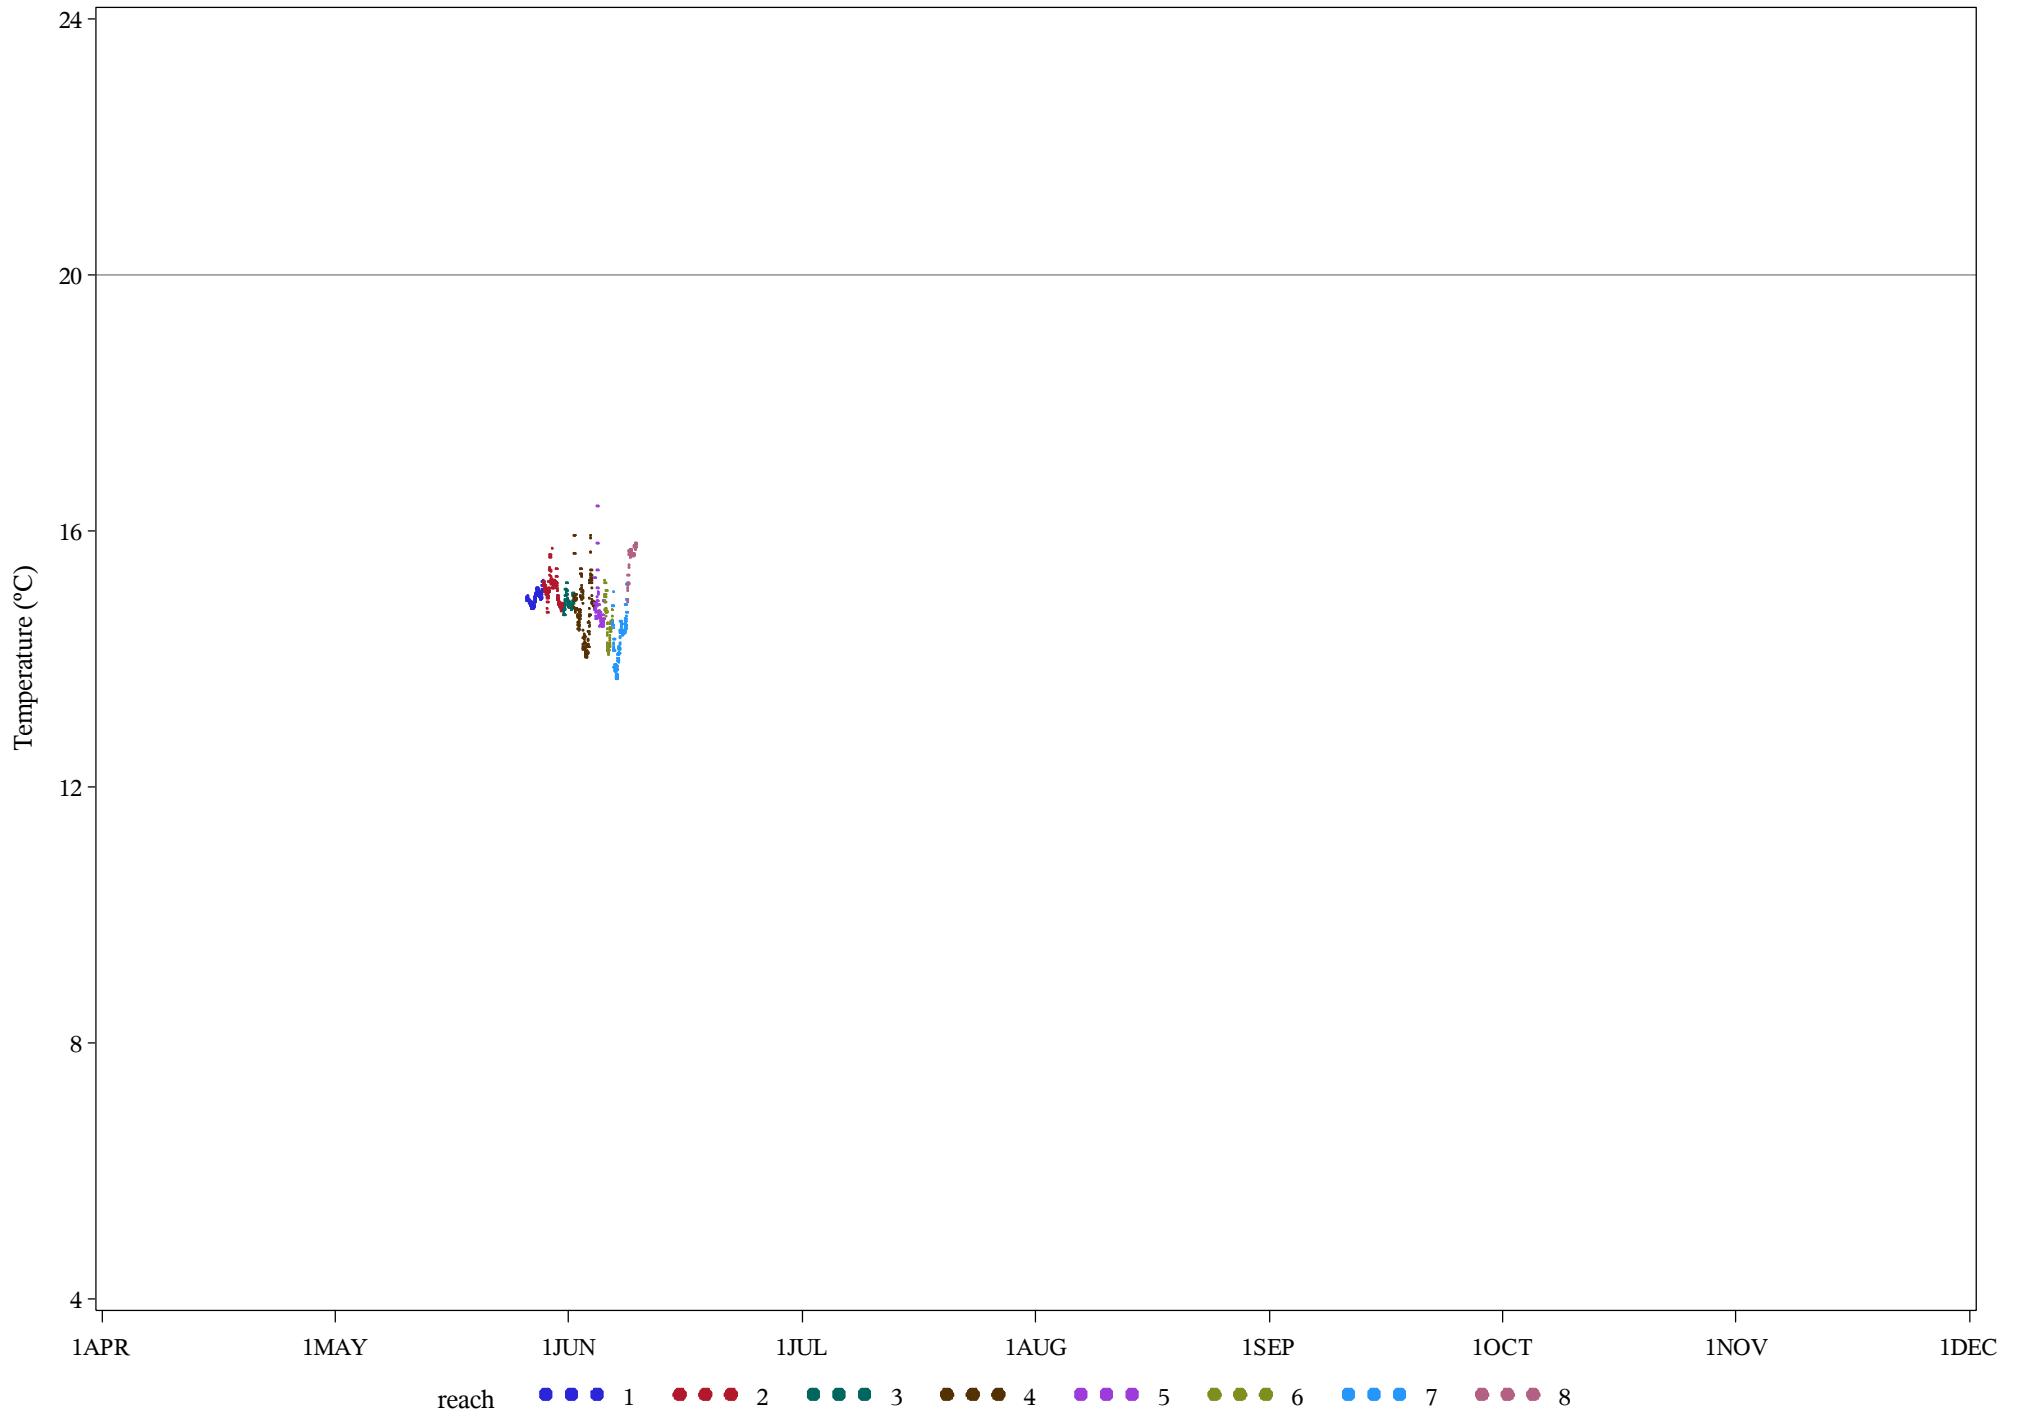



# Spring Chinook 3577A

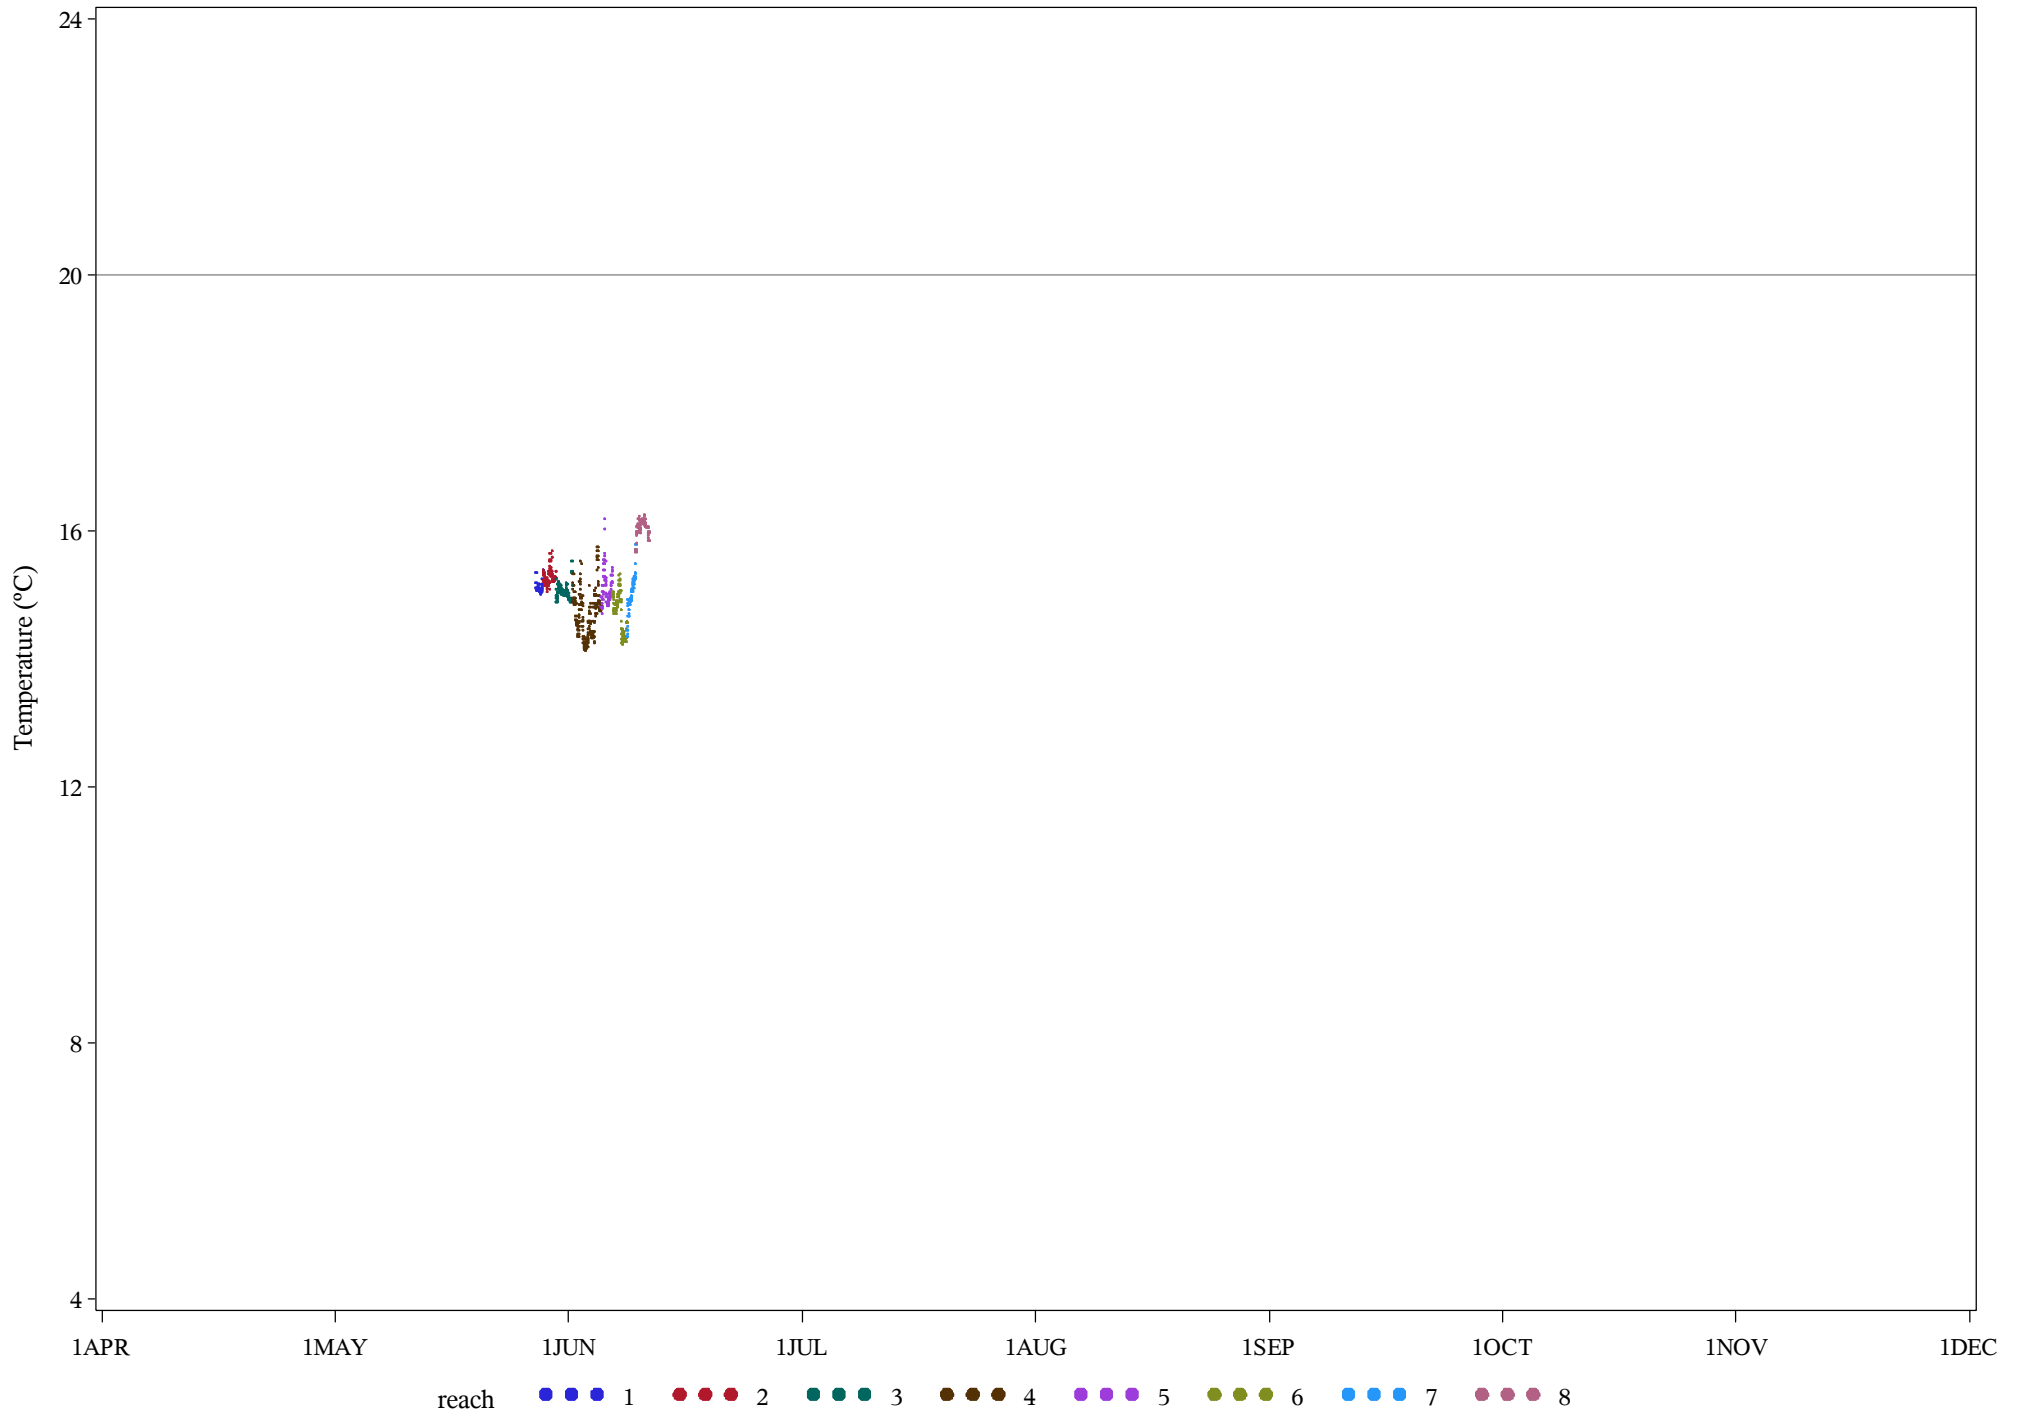

# Spring Chinook 3610A

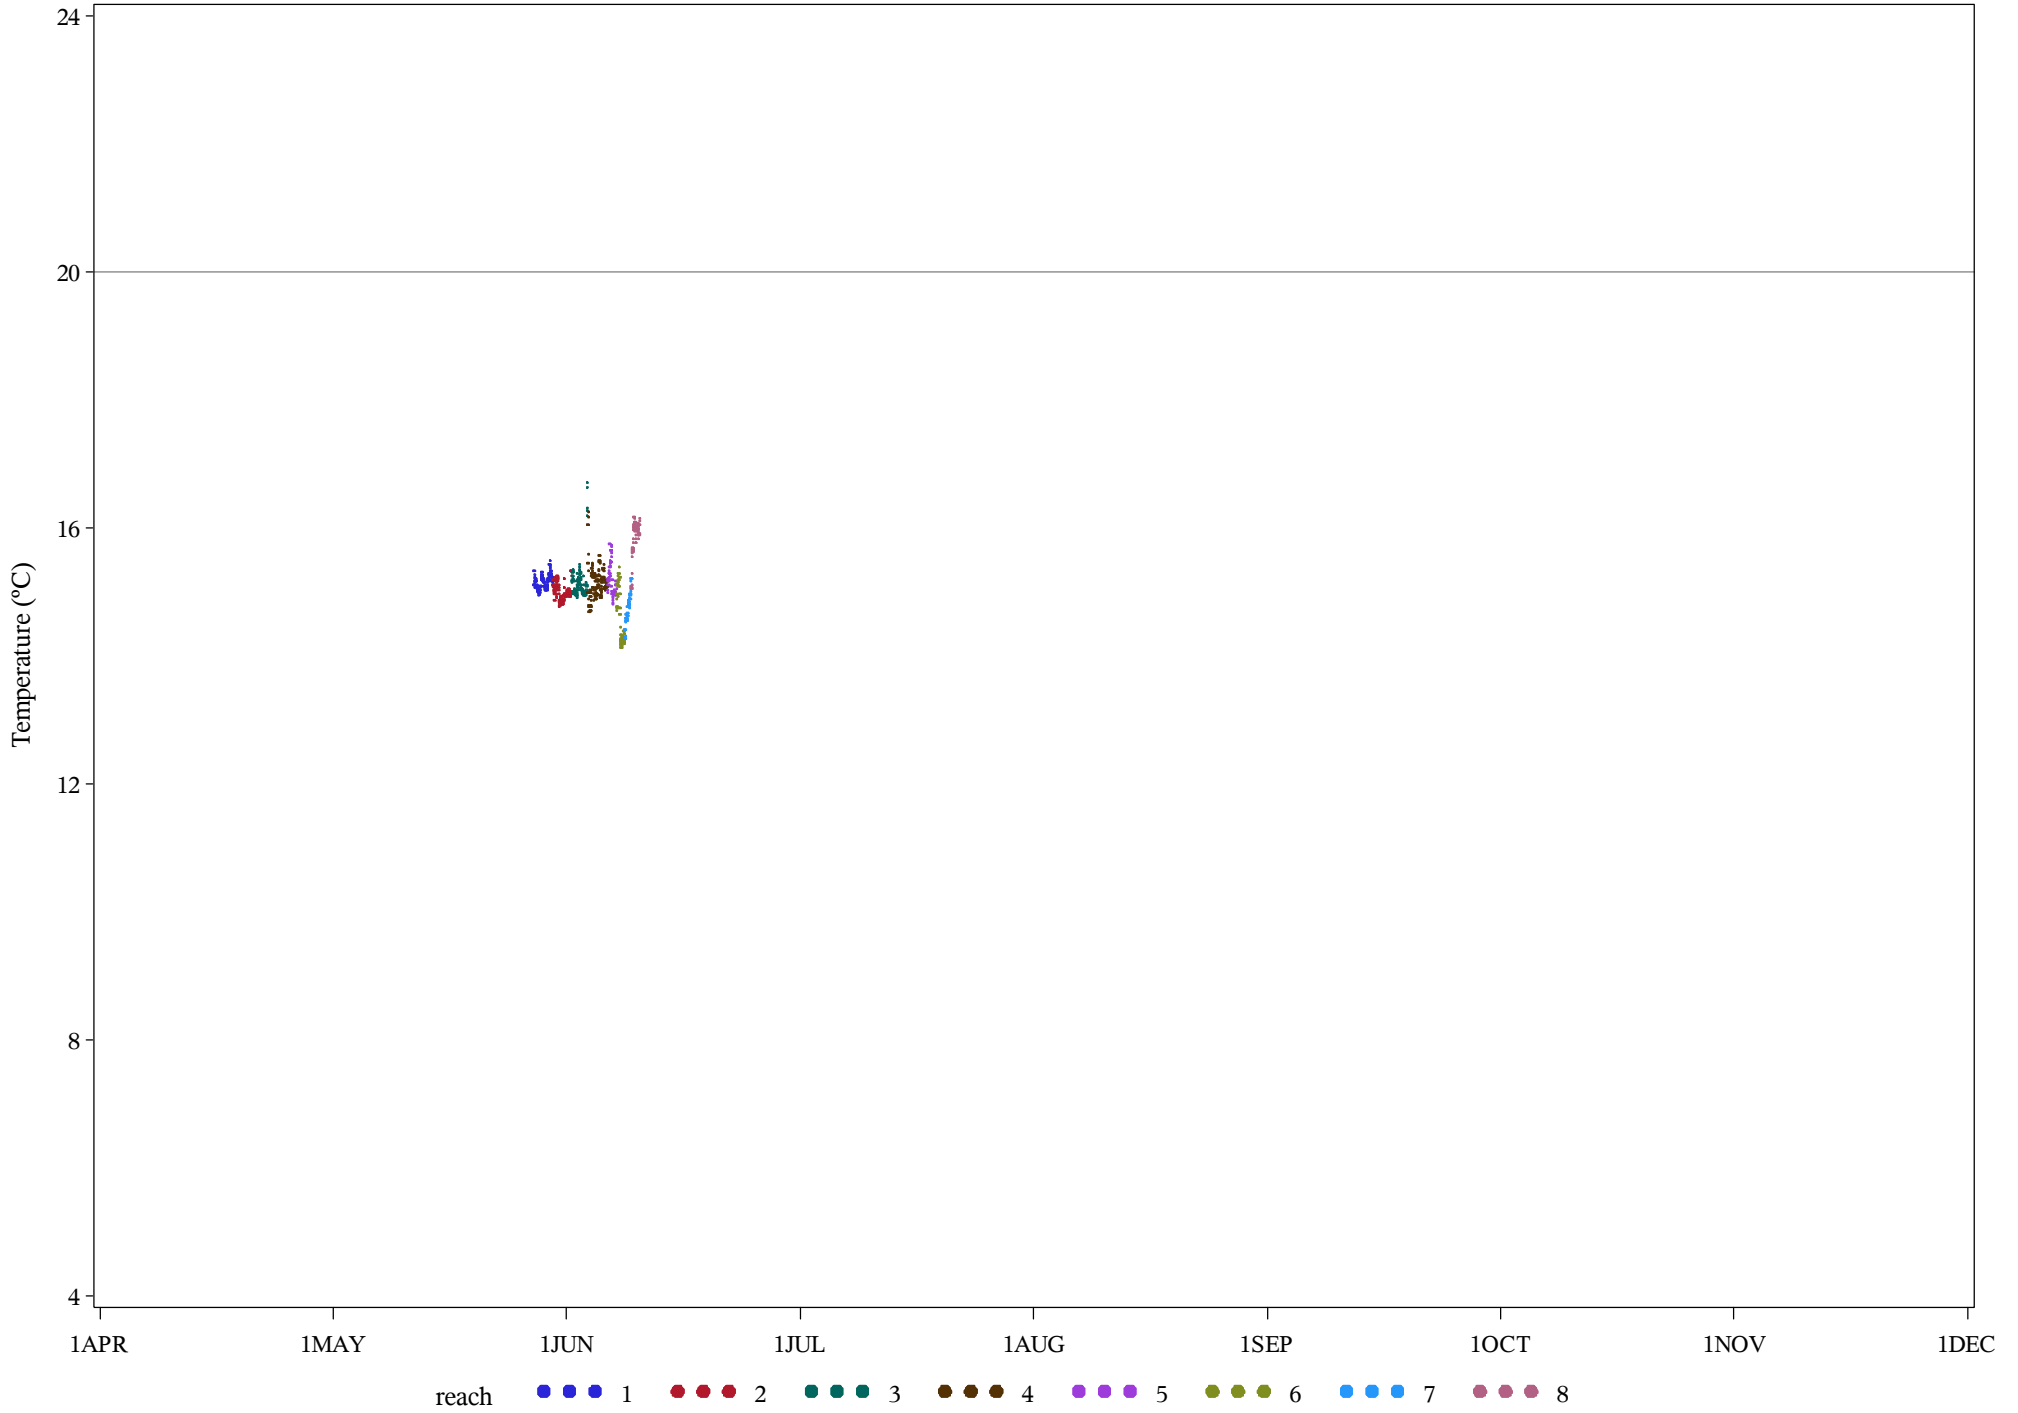

# Spring Chinook 3711A

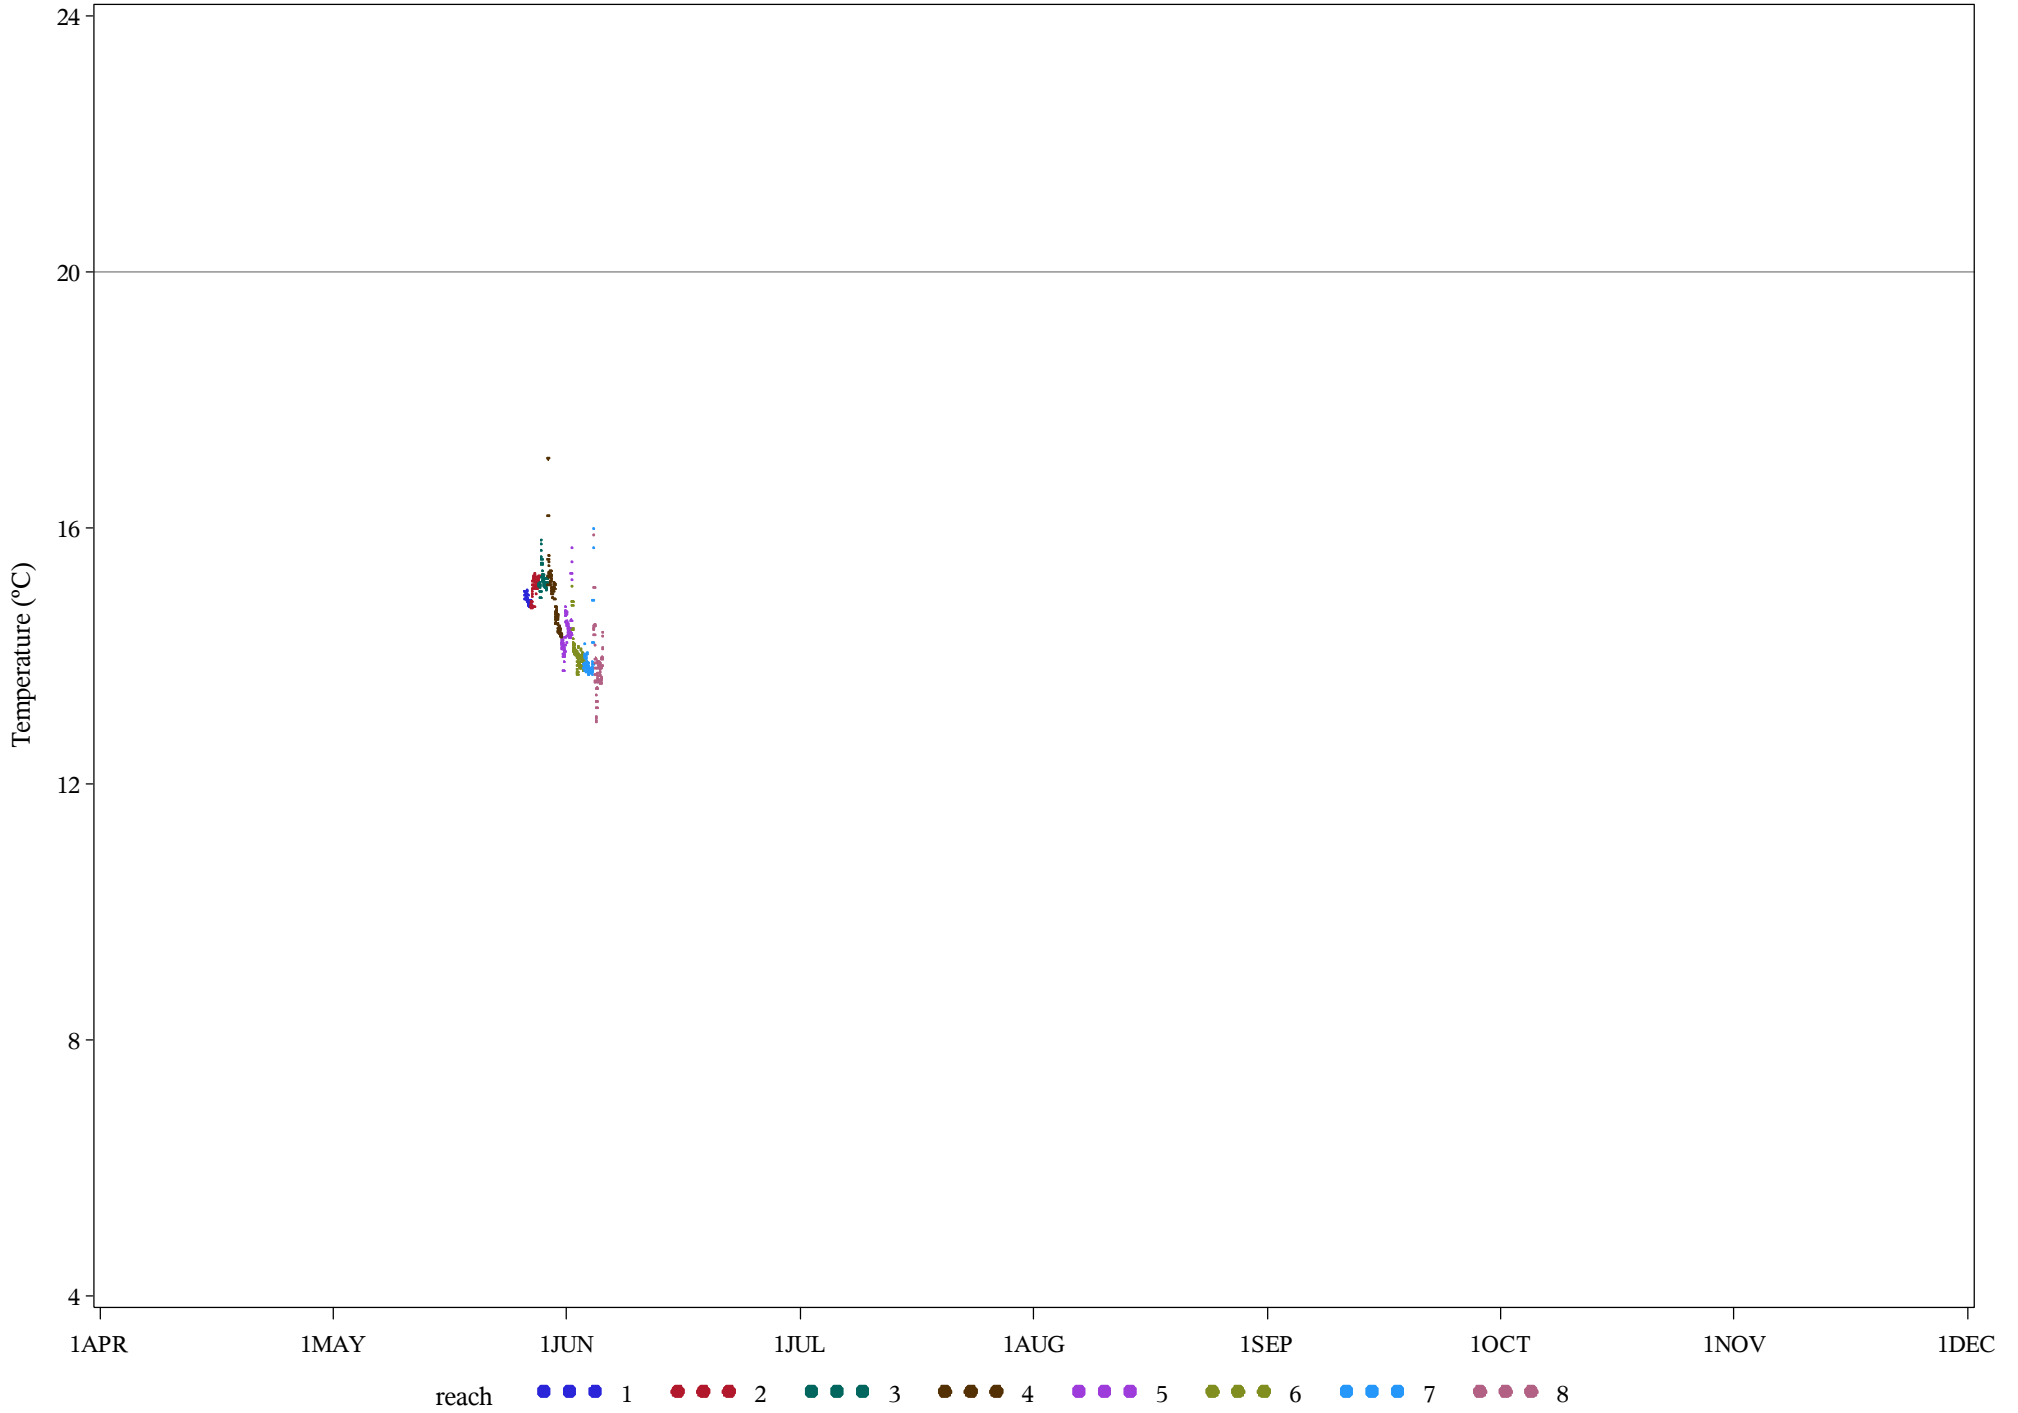

# Spring Chinook 3758A

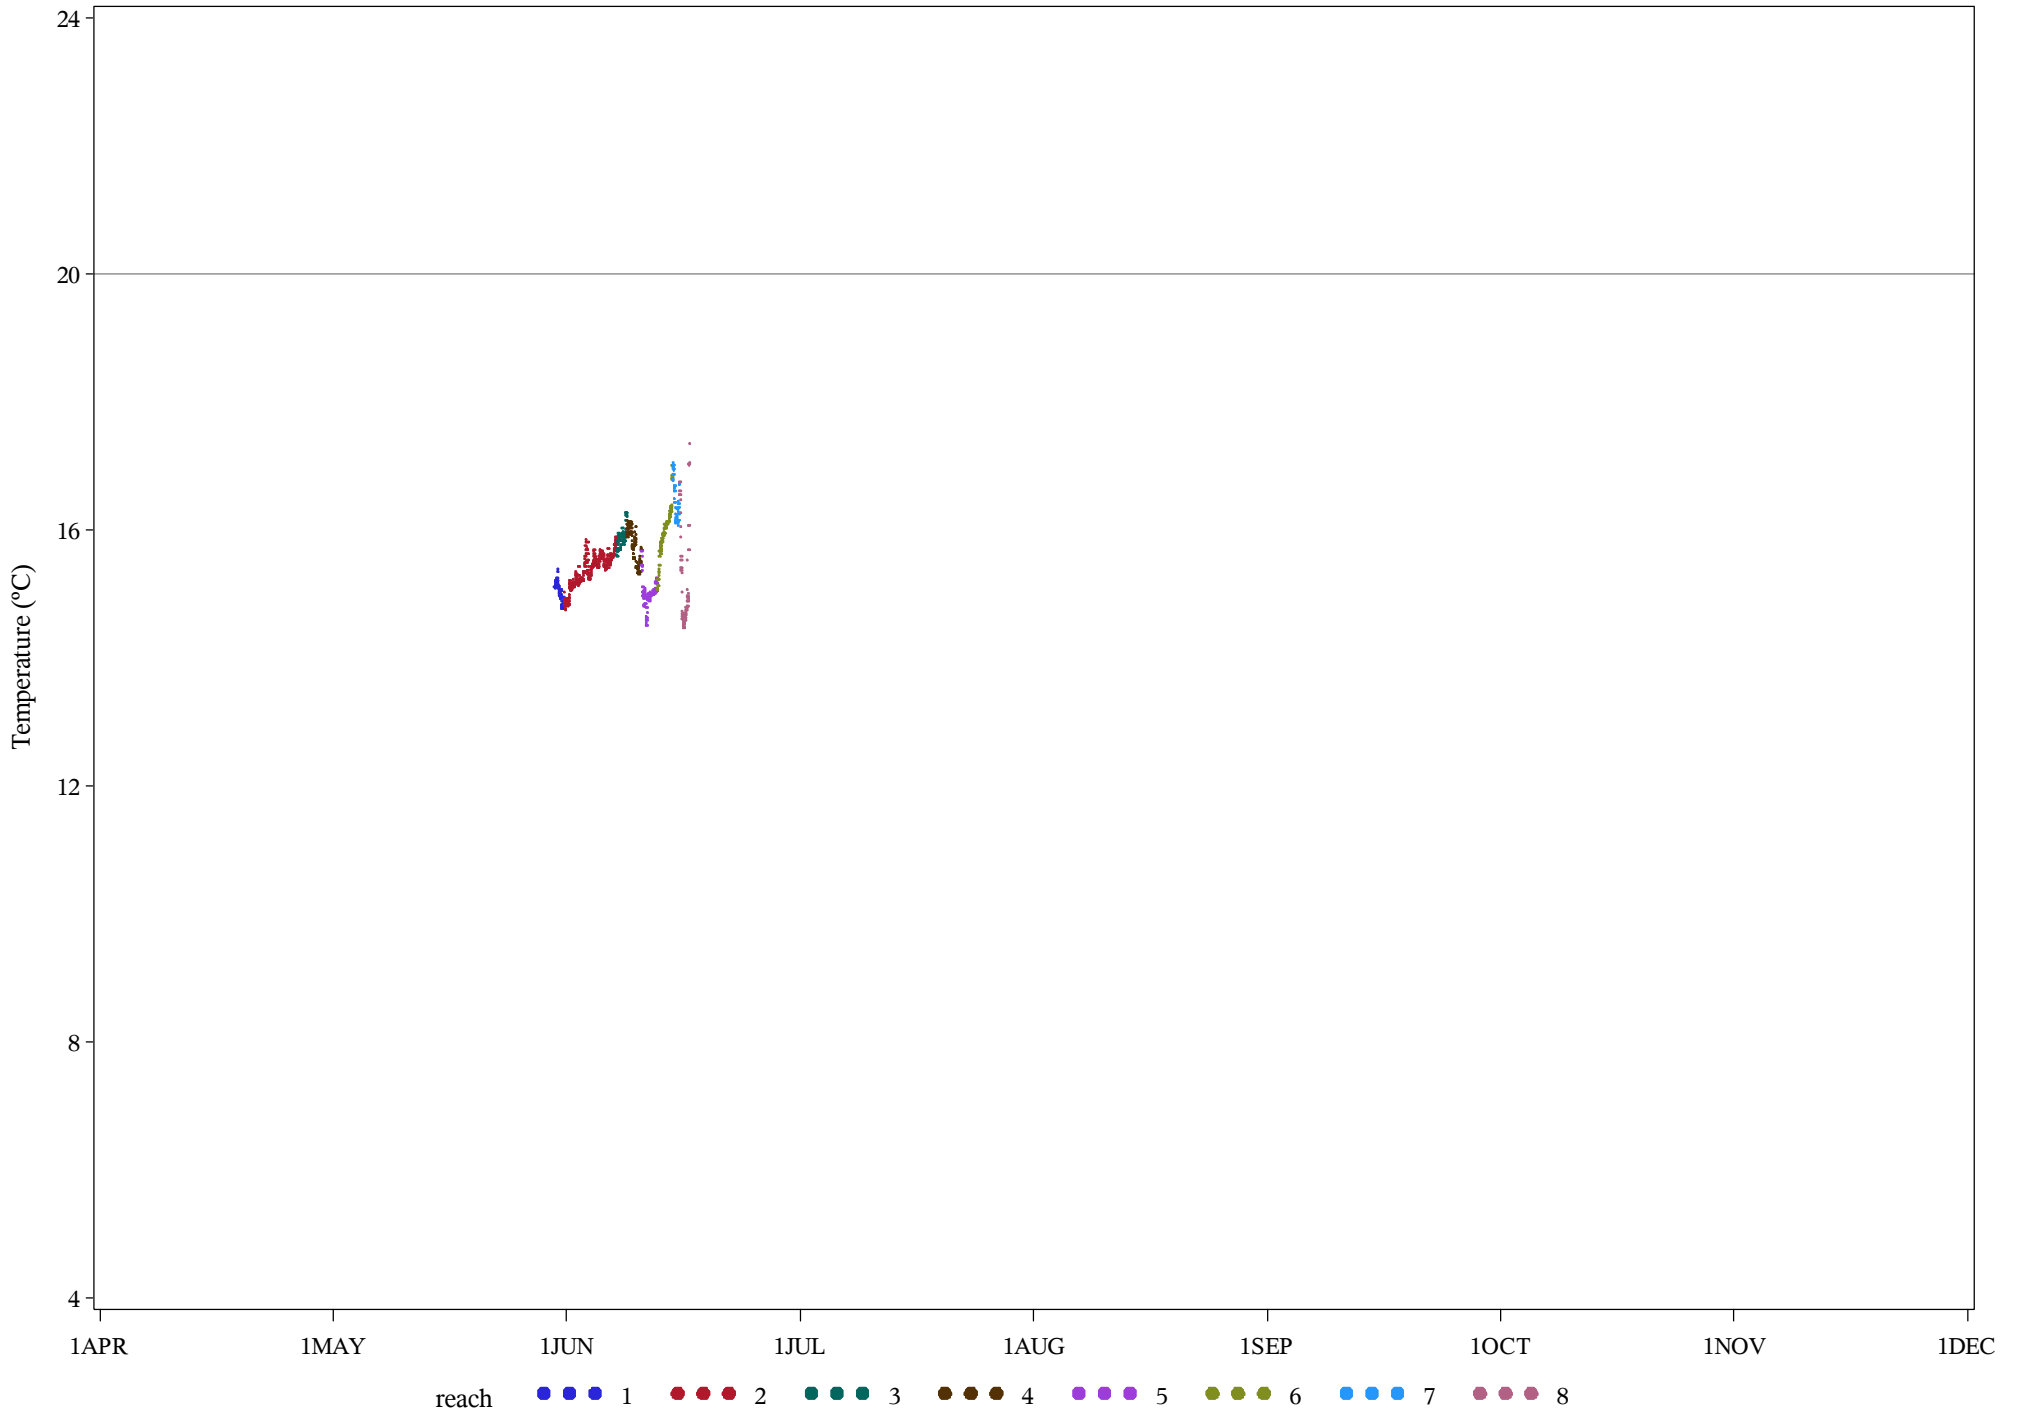

# Spring Chinook 3761A

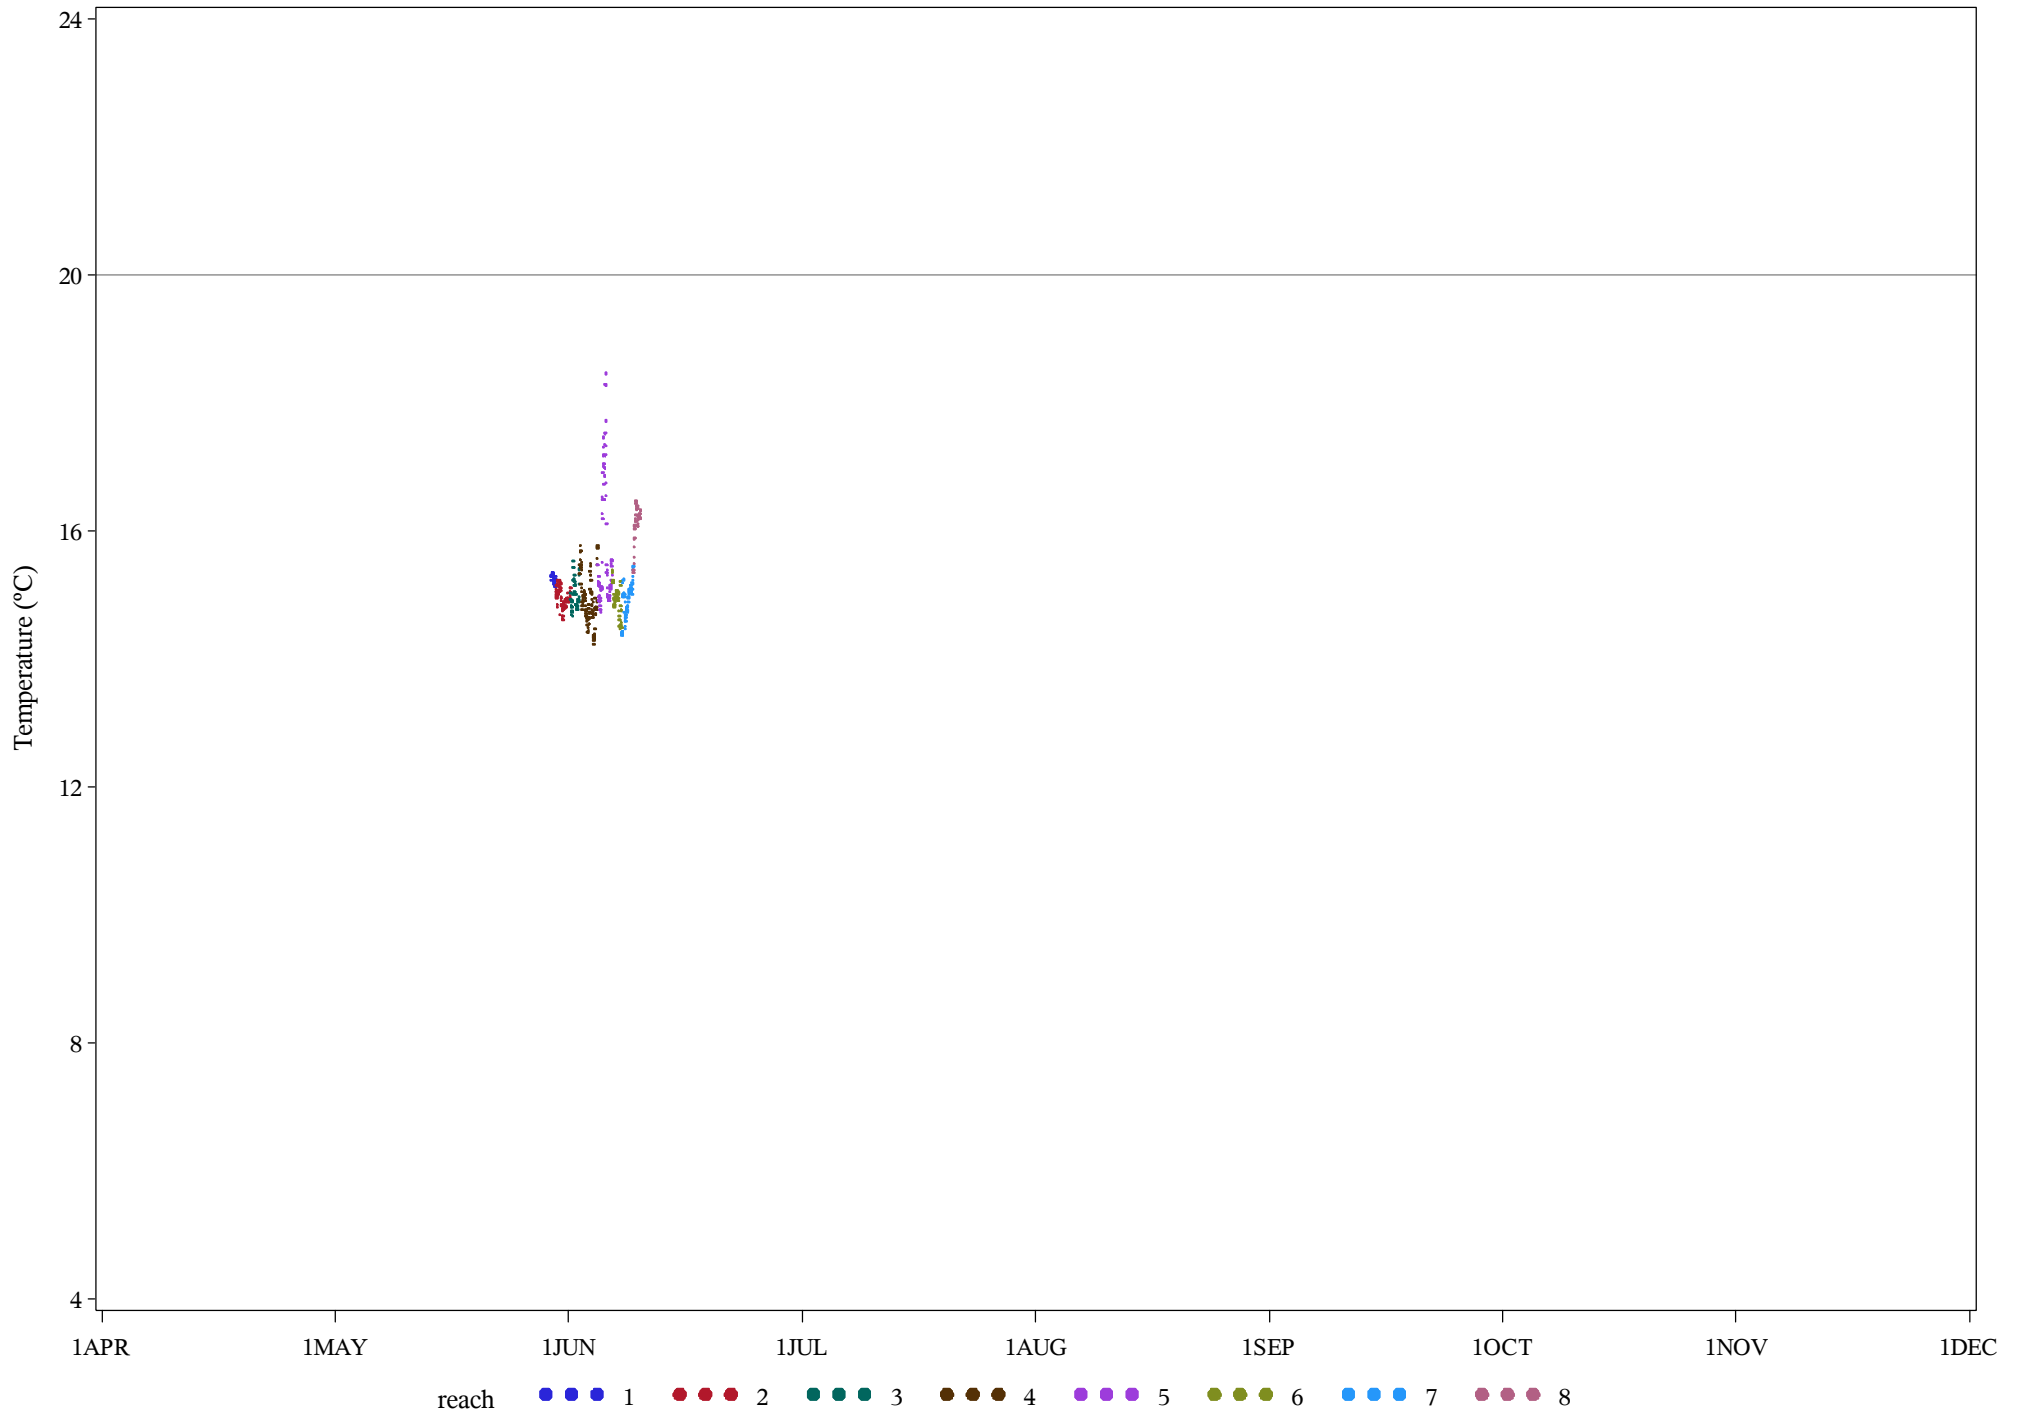

# Spring Chinook 3769A

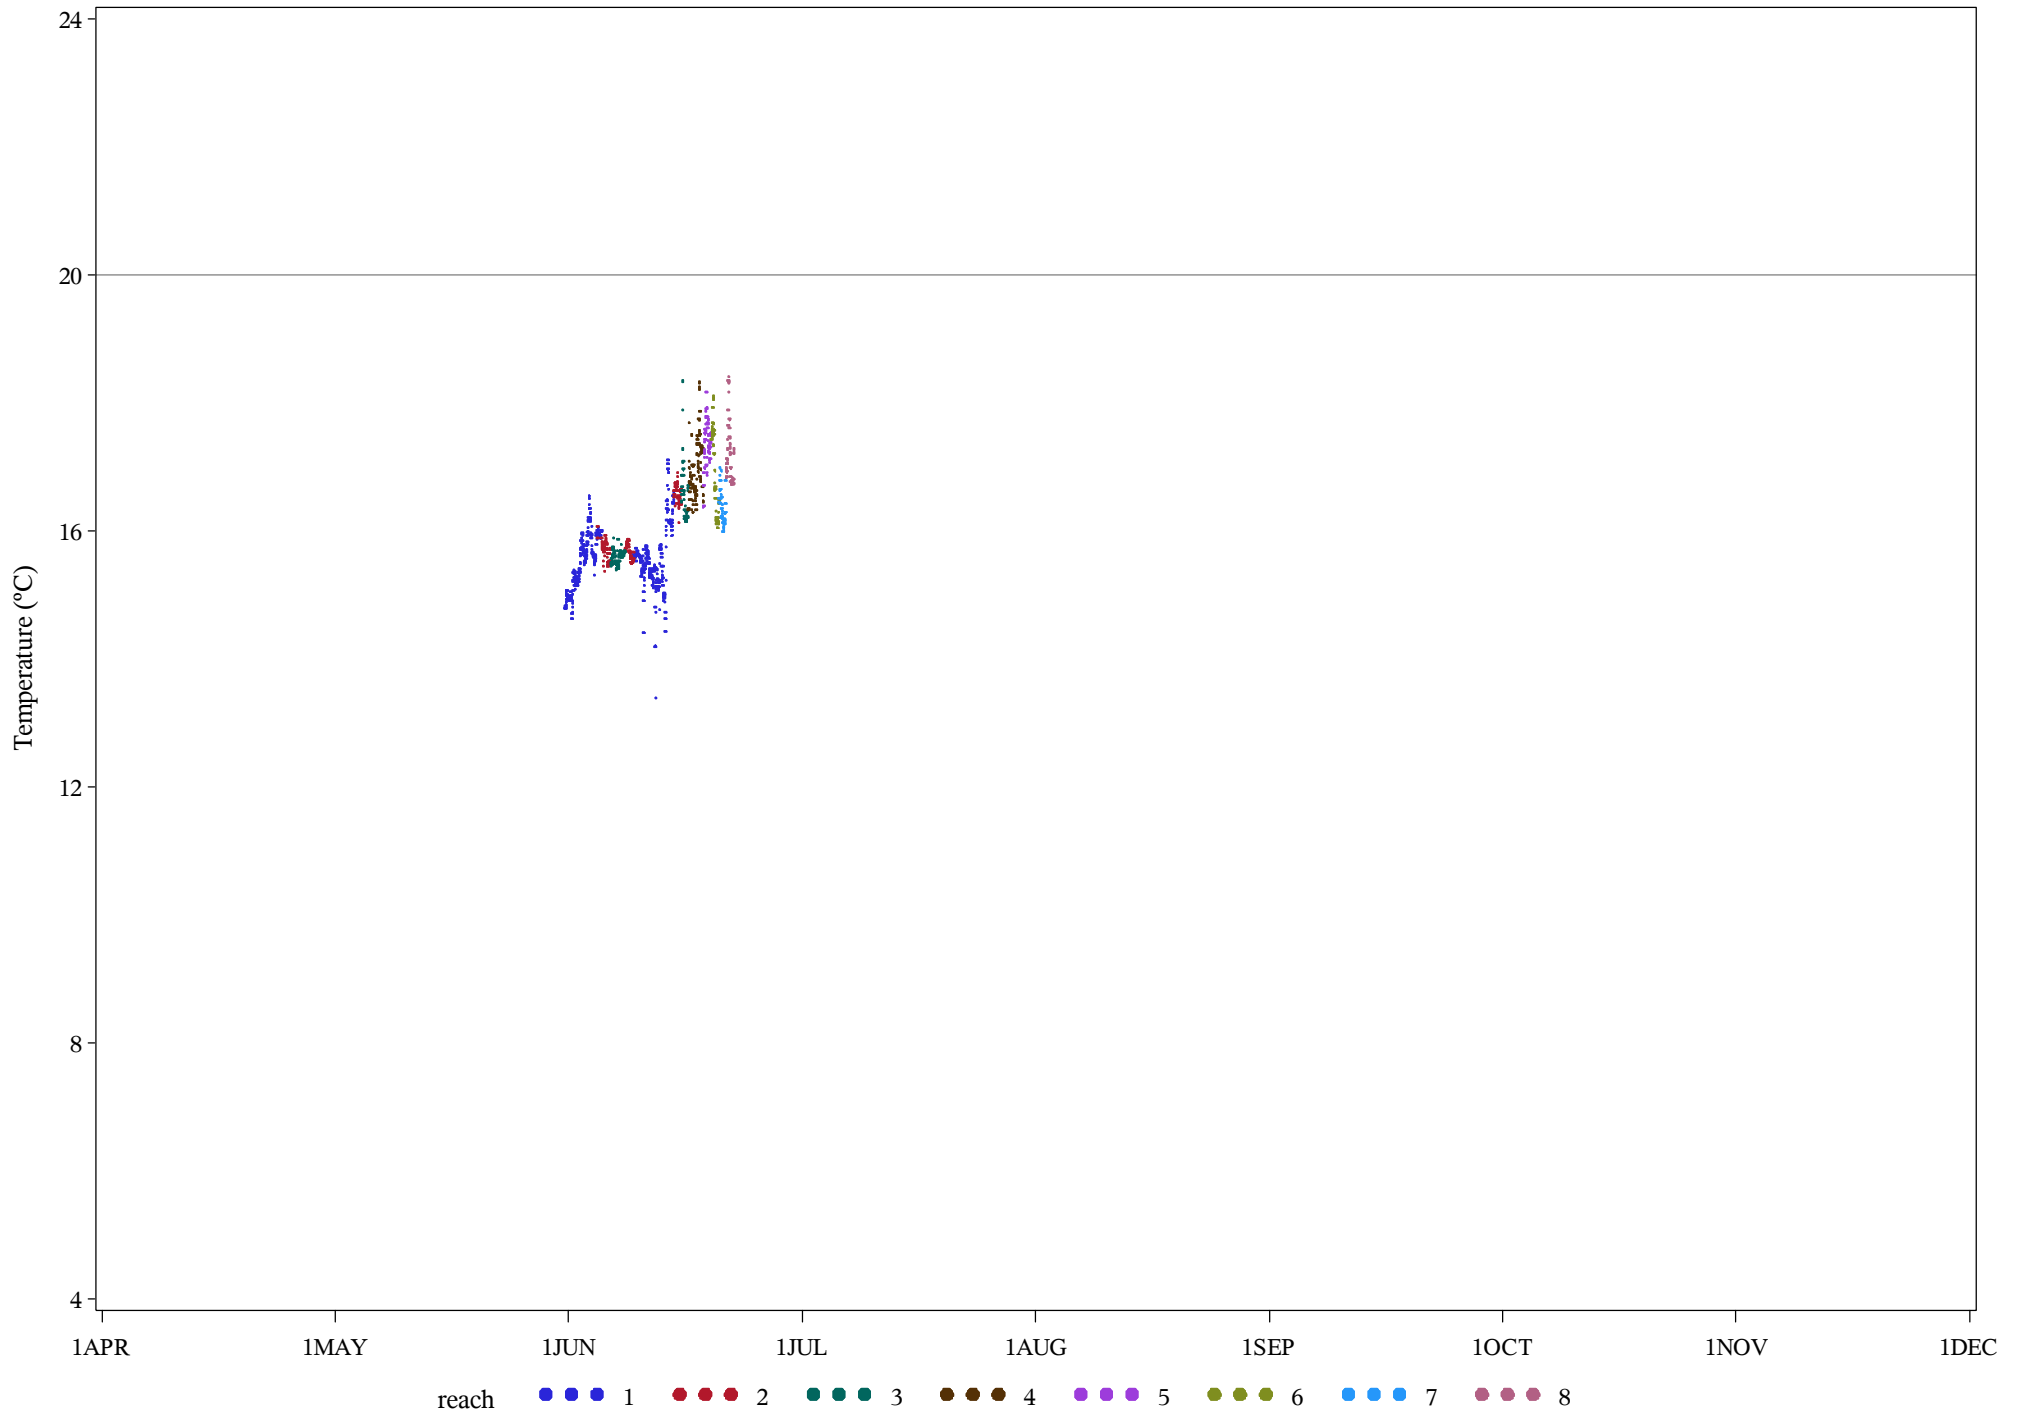

# Spring Chinook 3787A

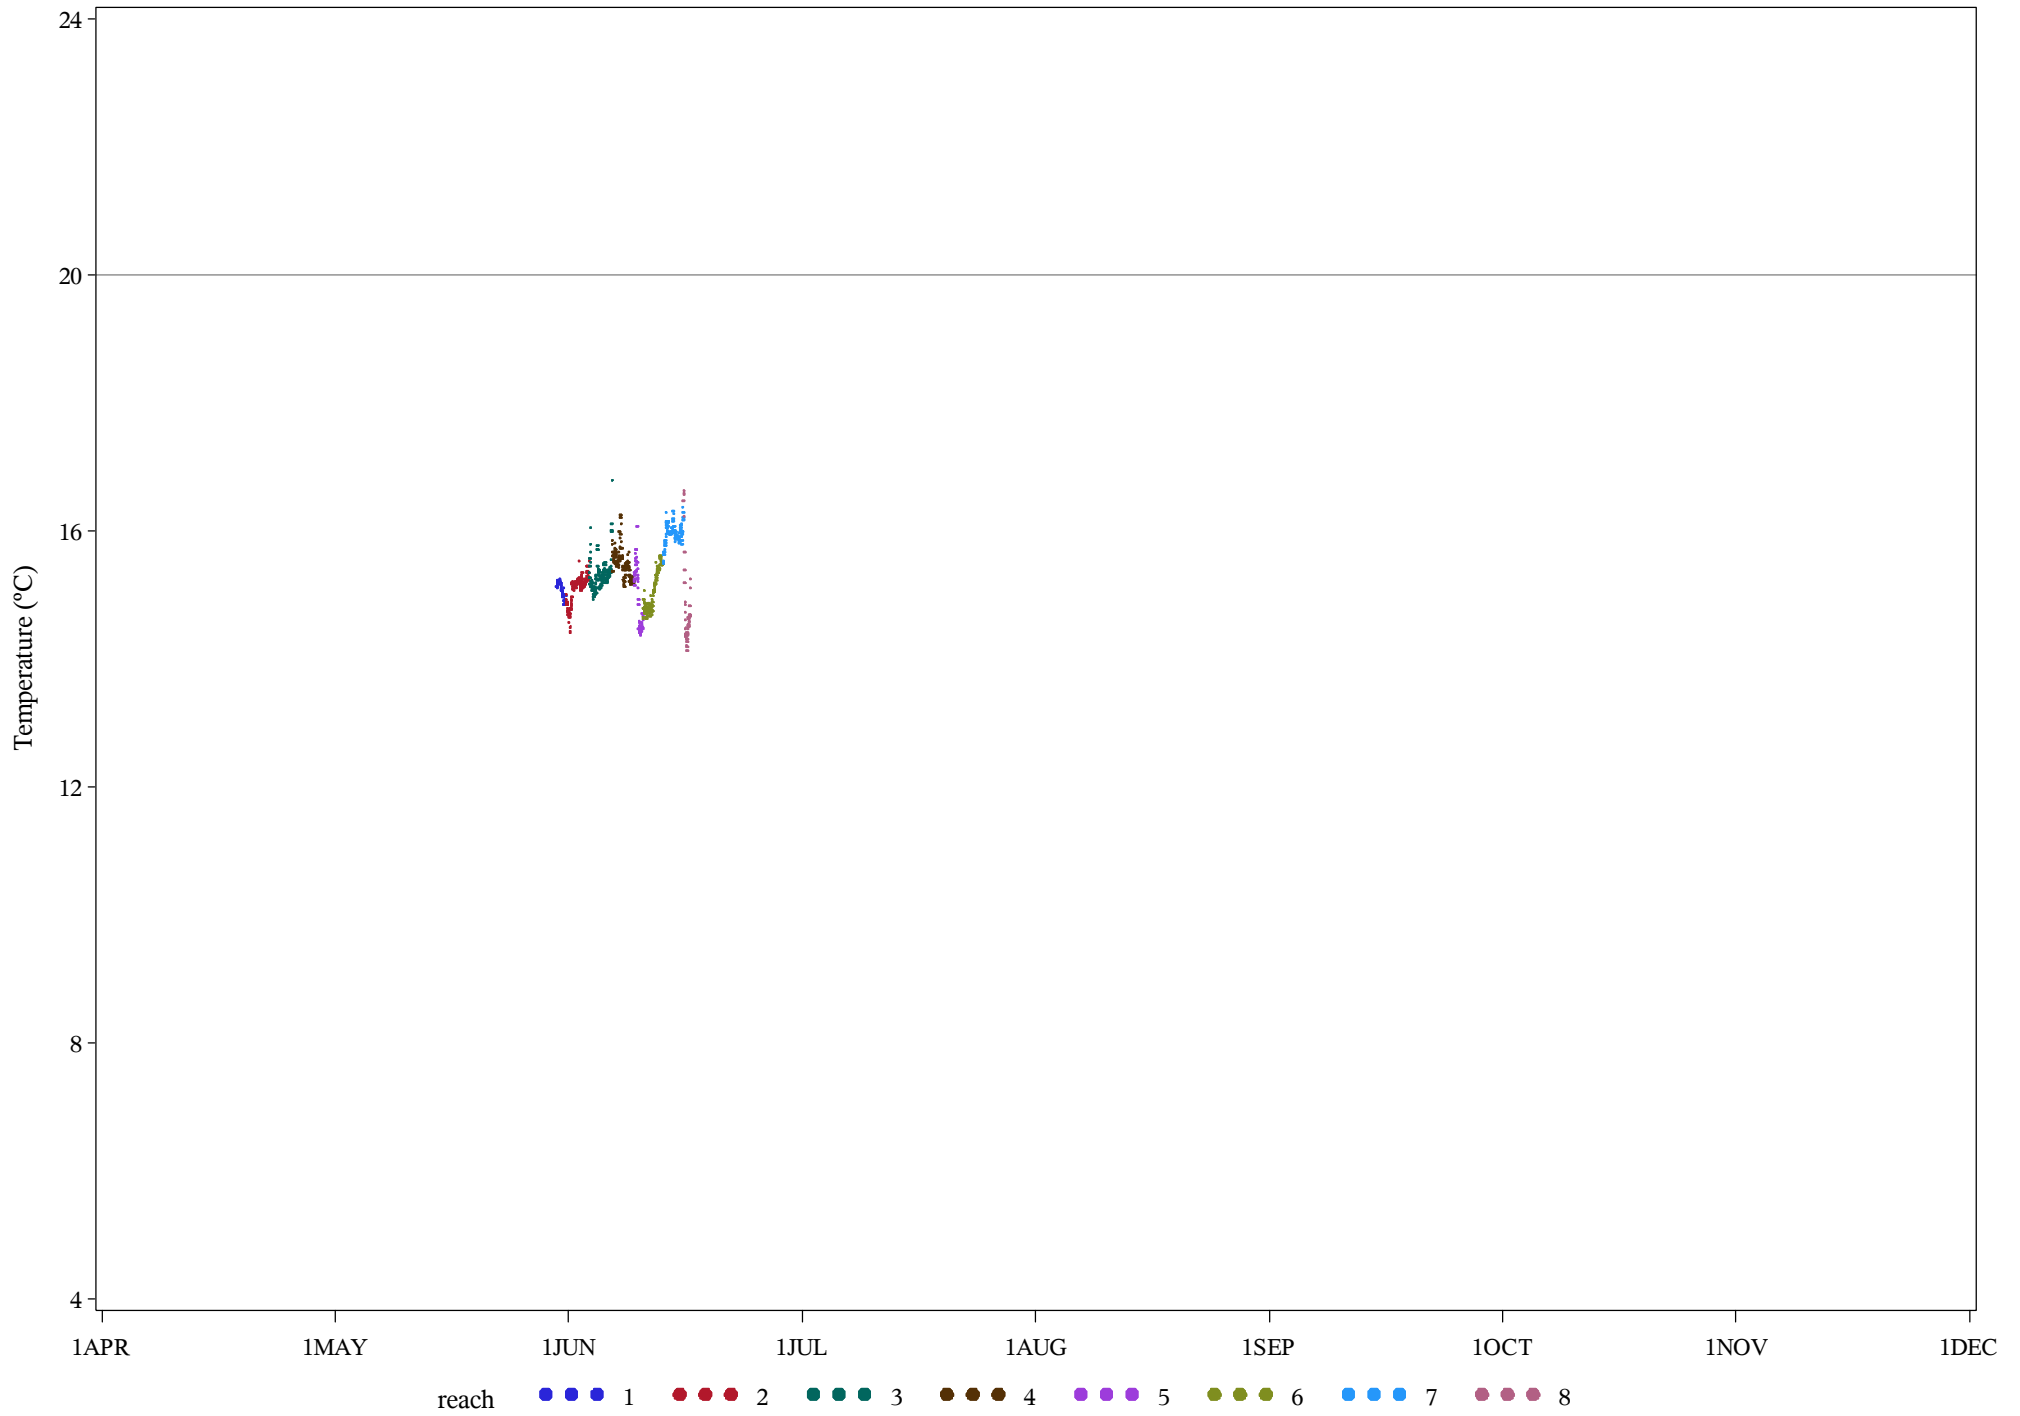

Steelhead  
2518B

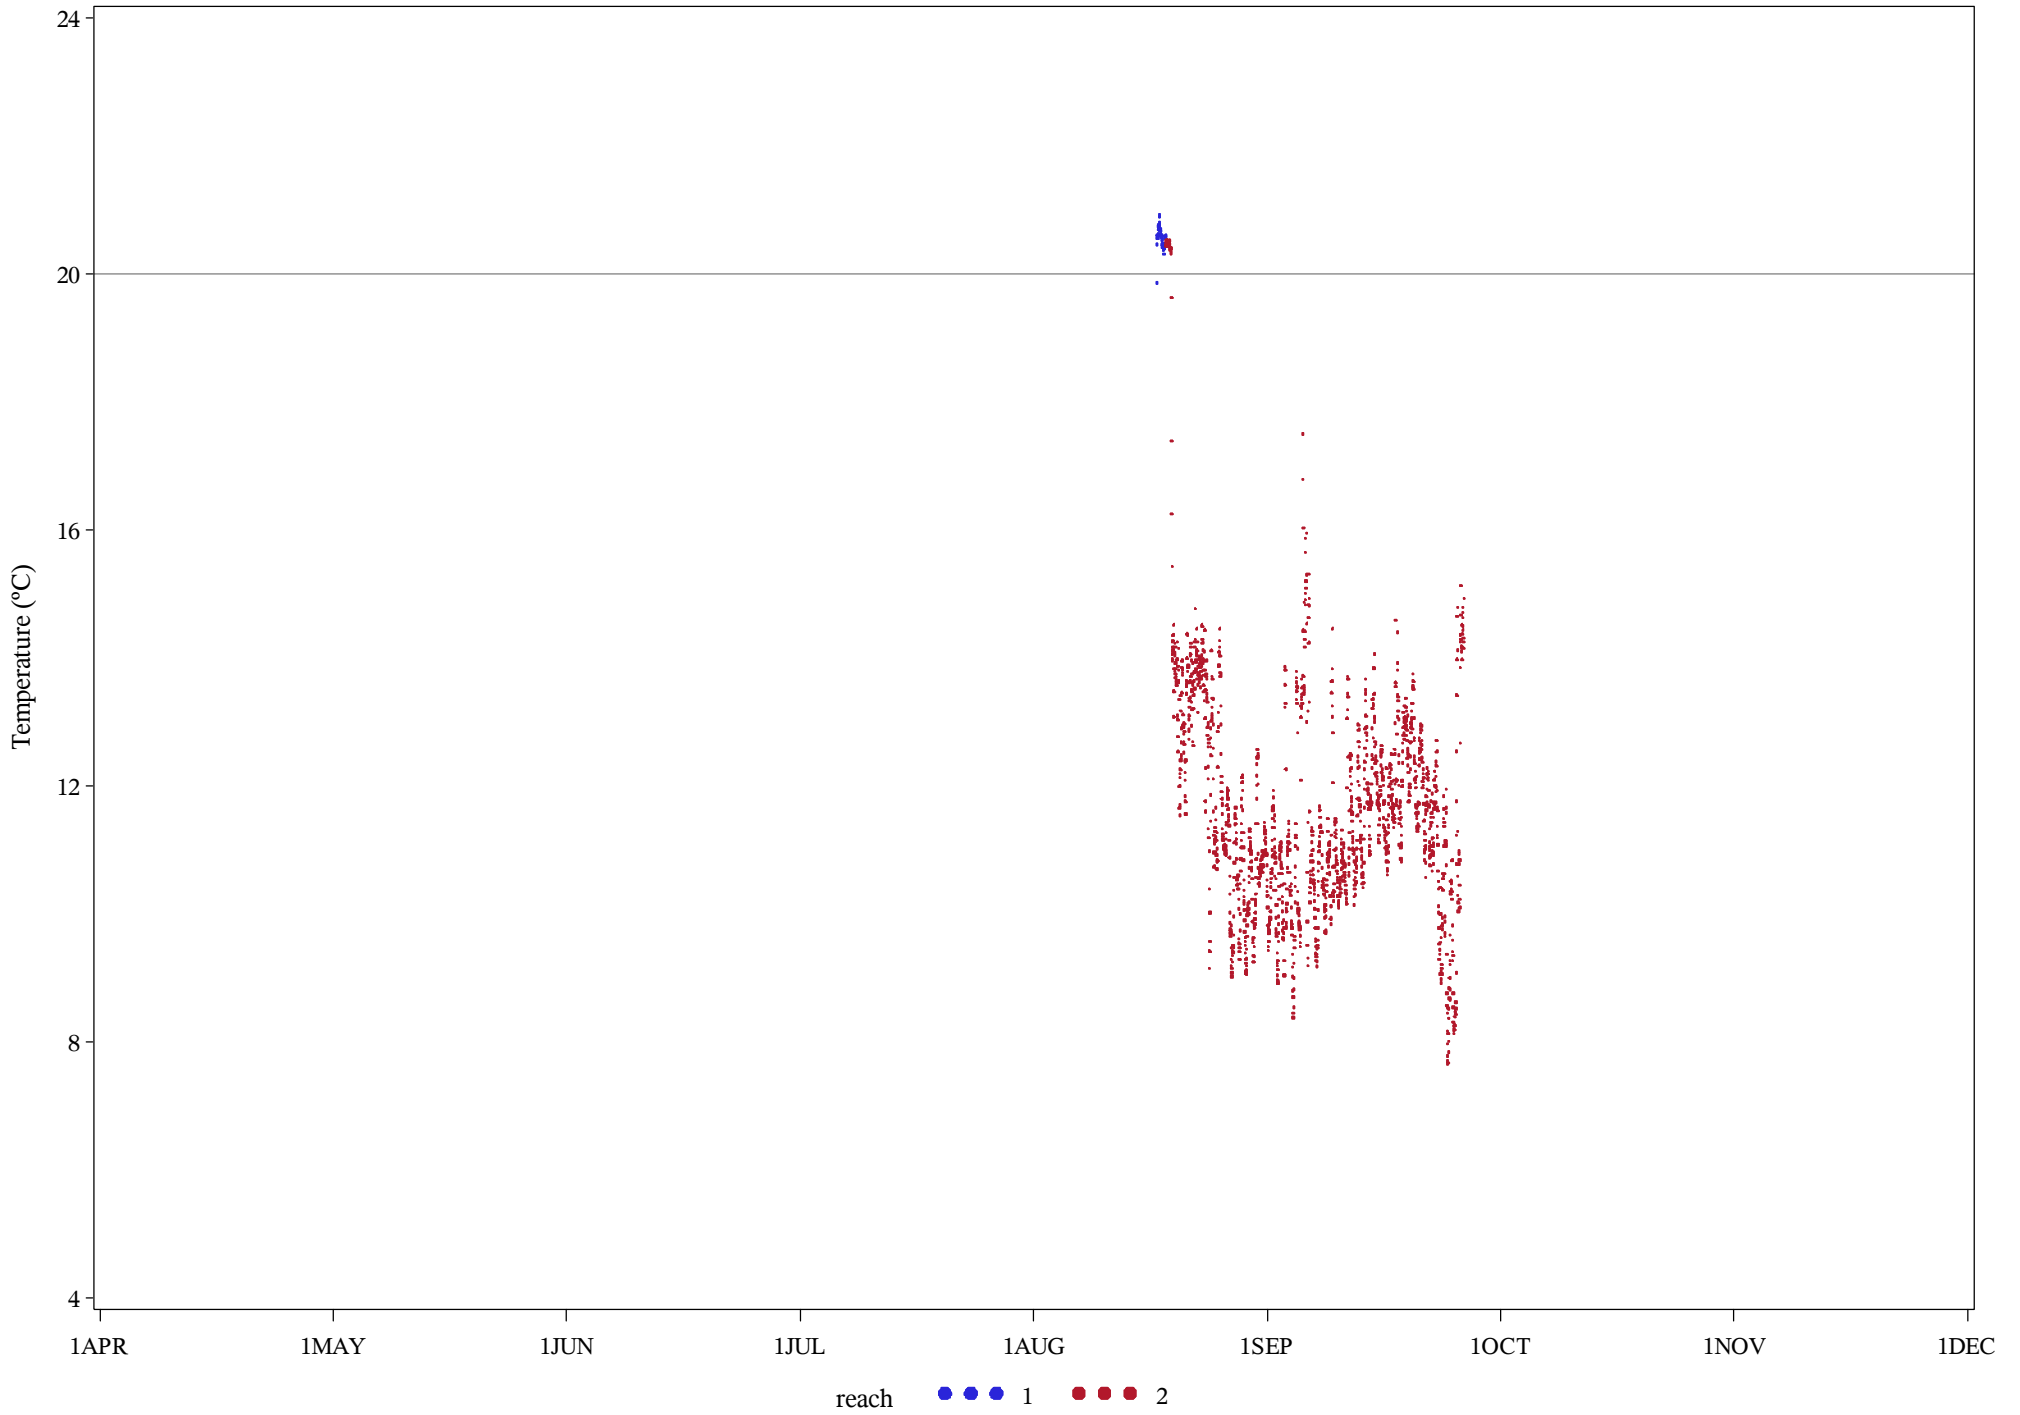





# Steelhead 2560C

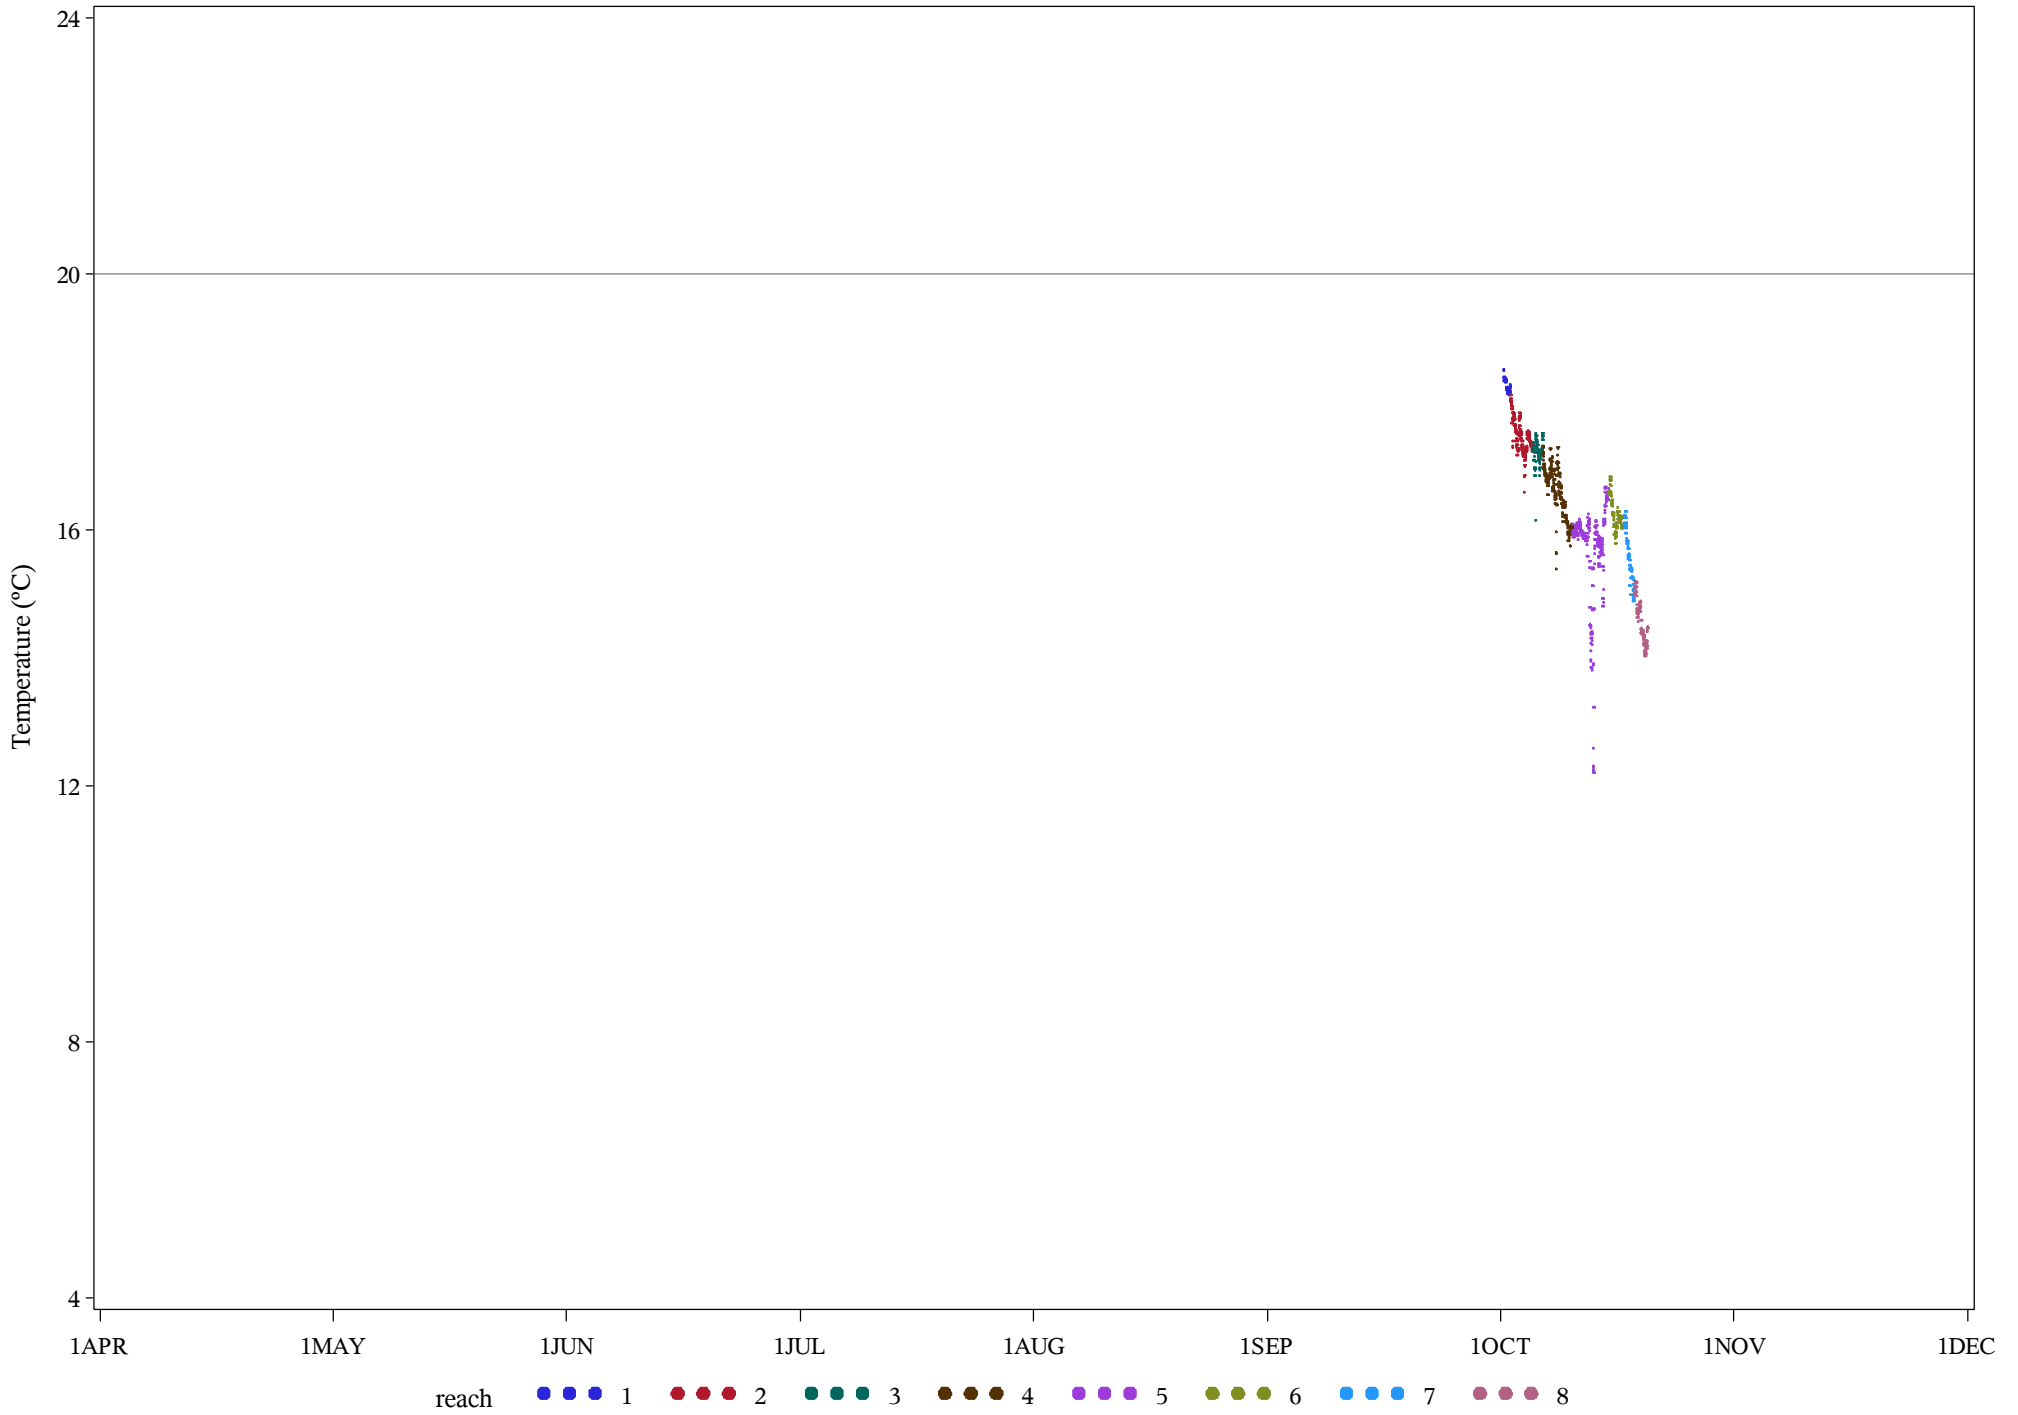



# Steelhead 2602B

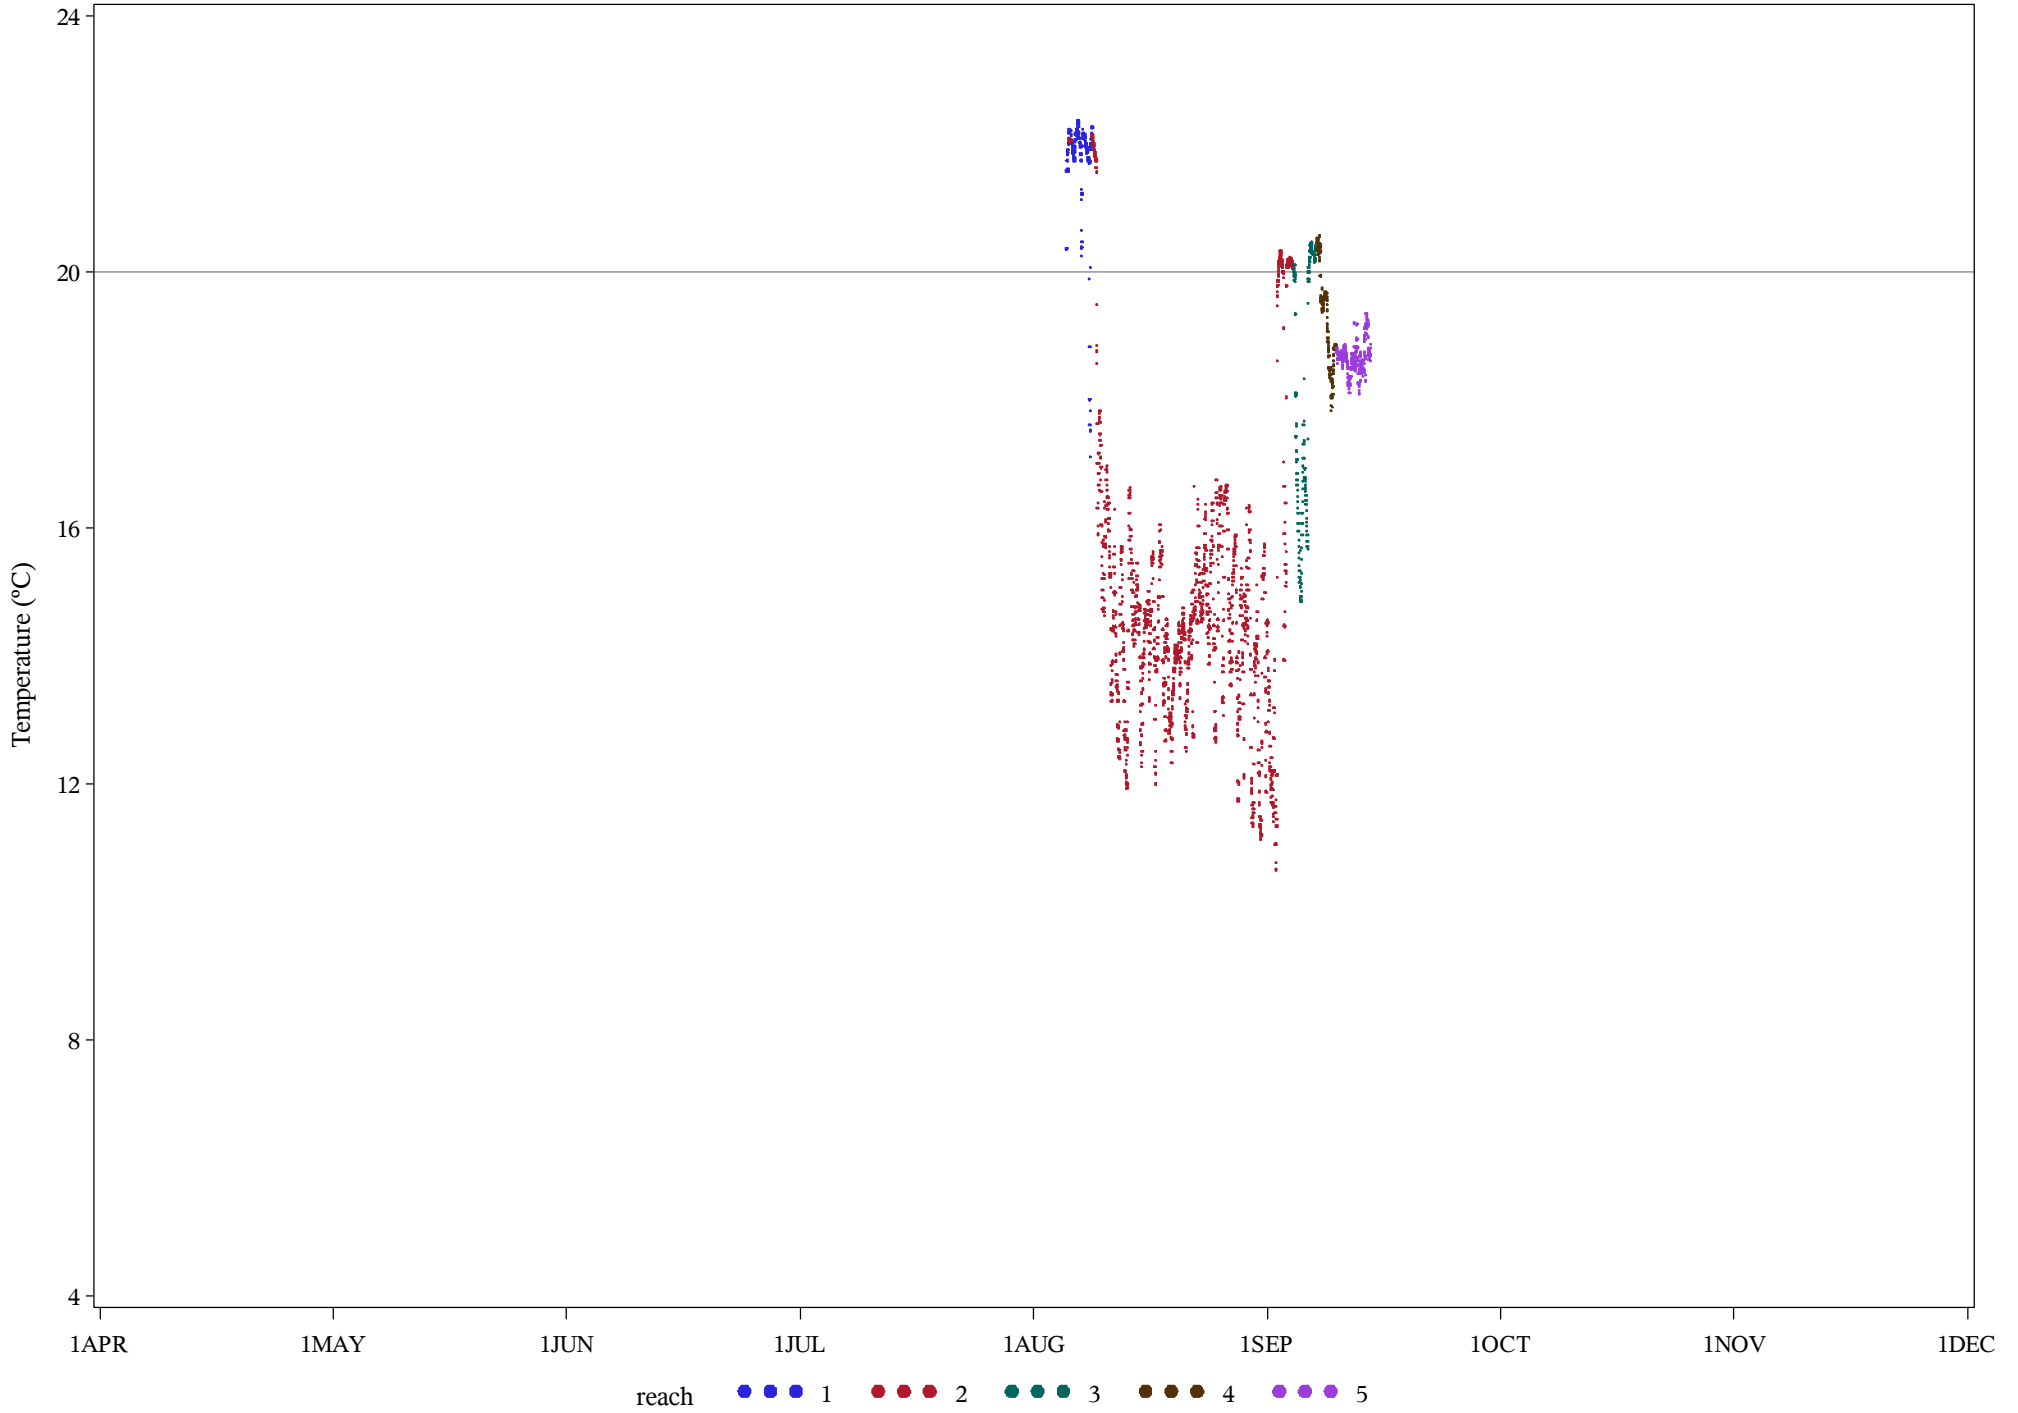

Steelhead  
2617B

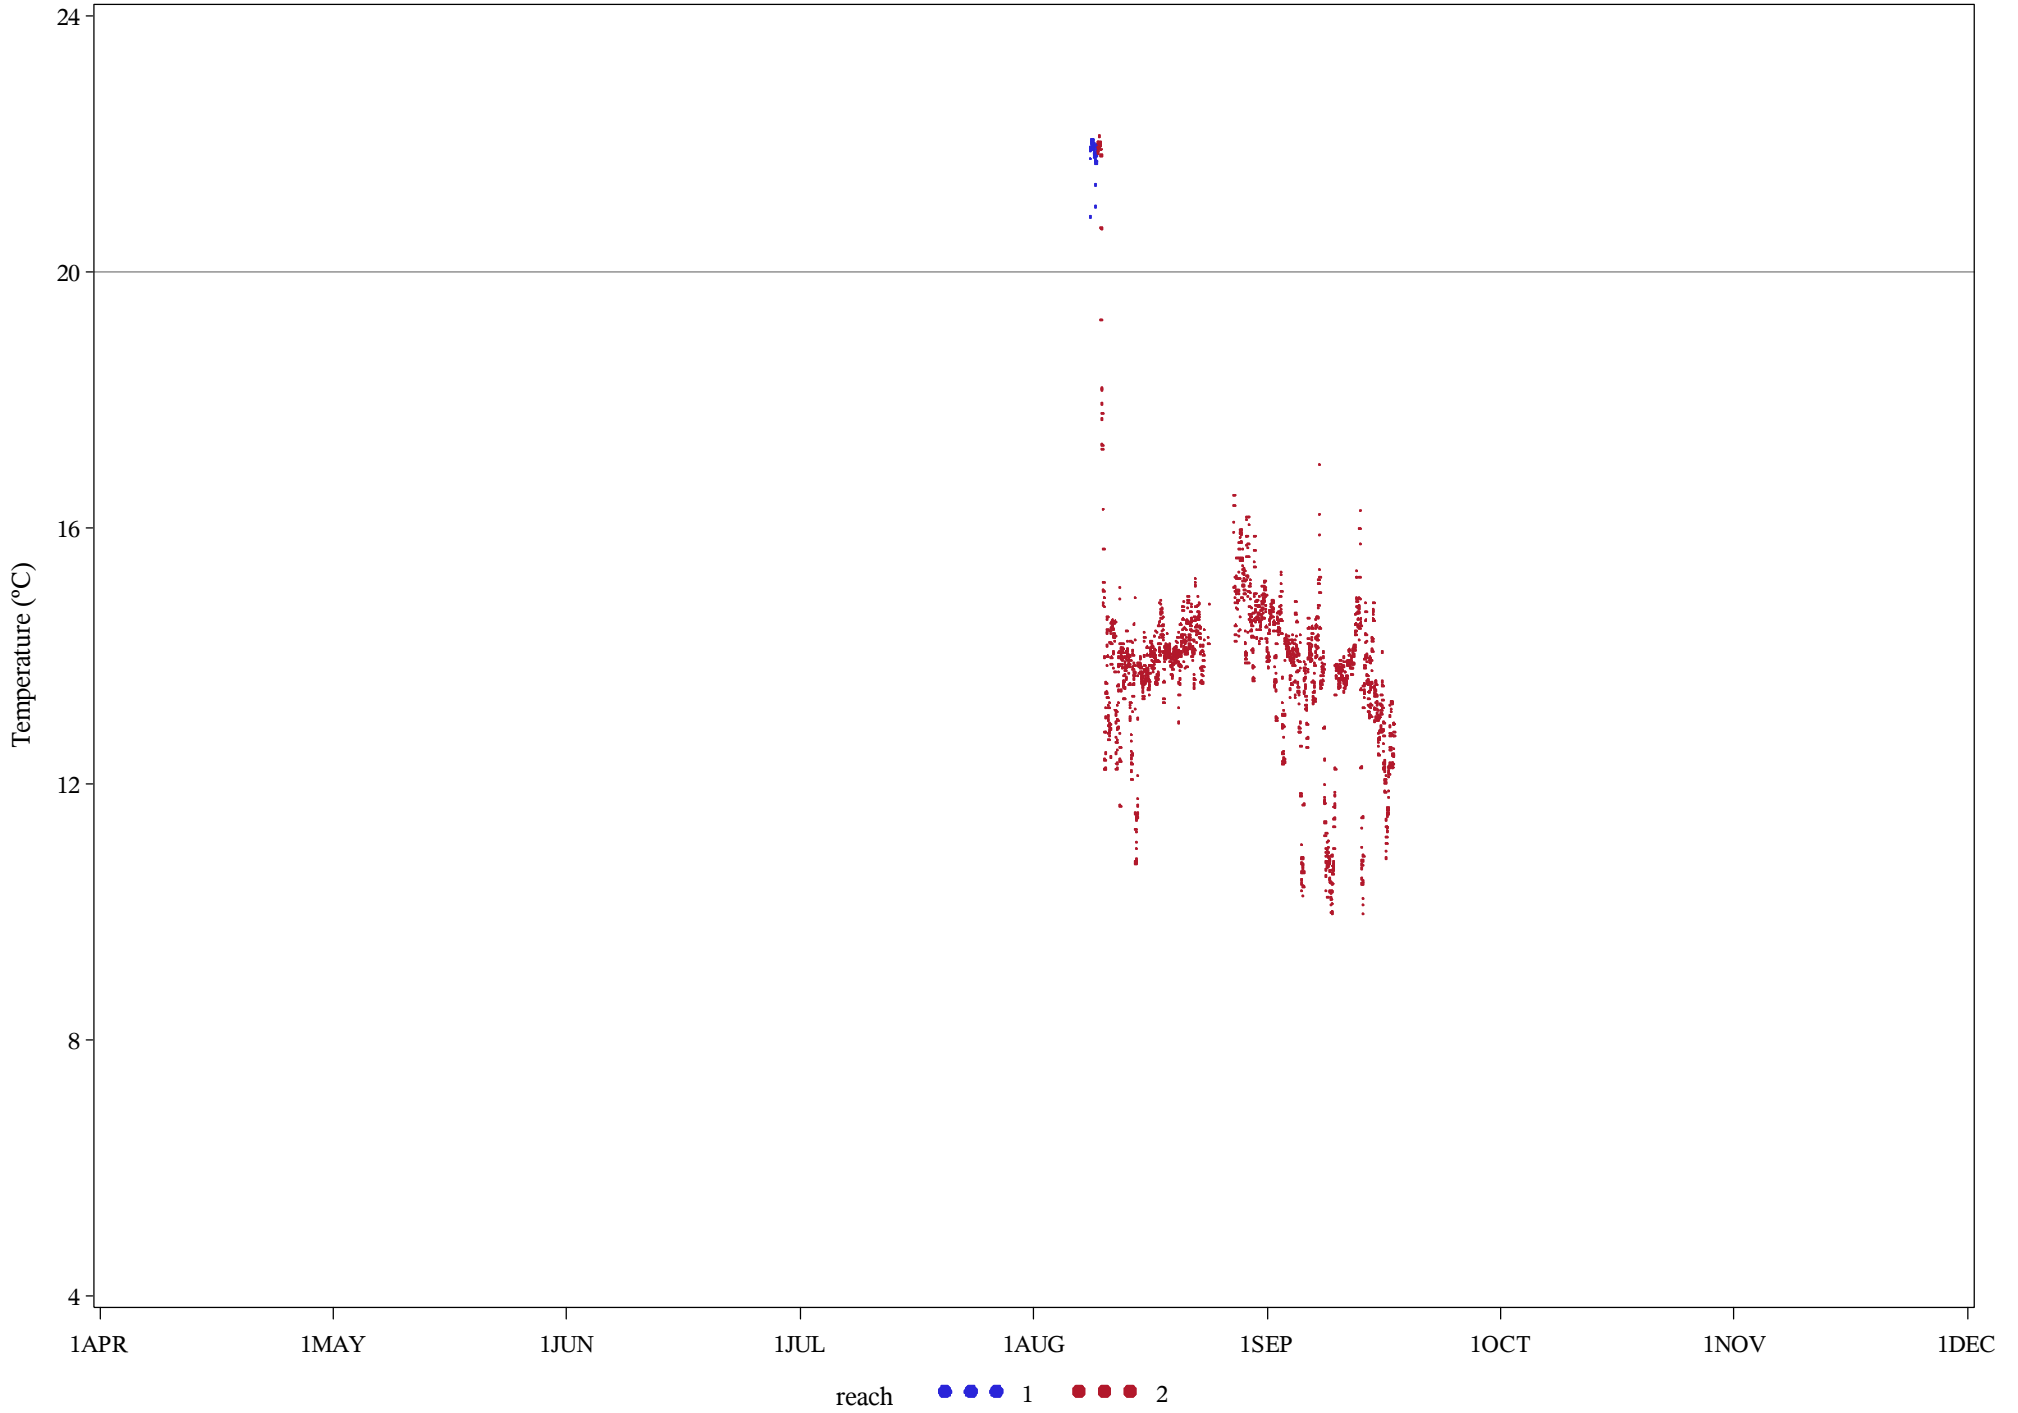

Steelhead  
2621B

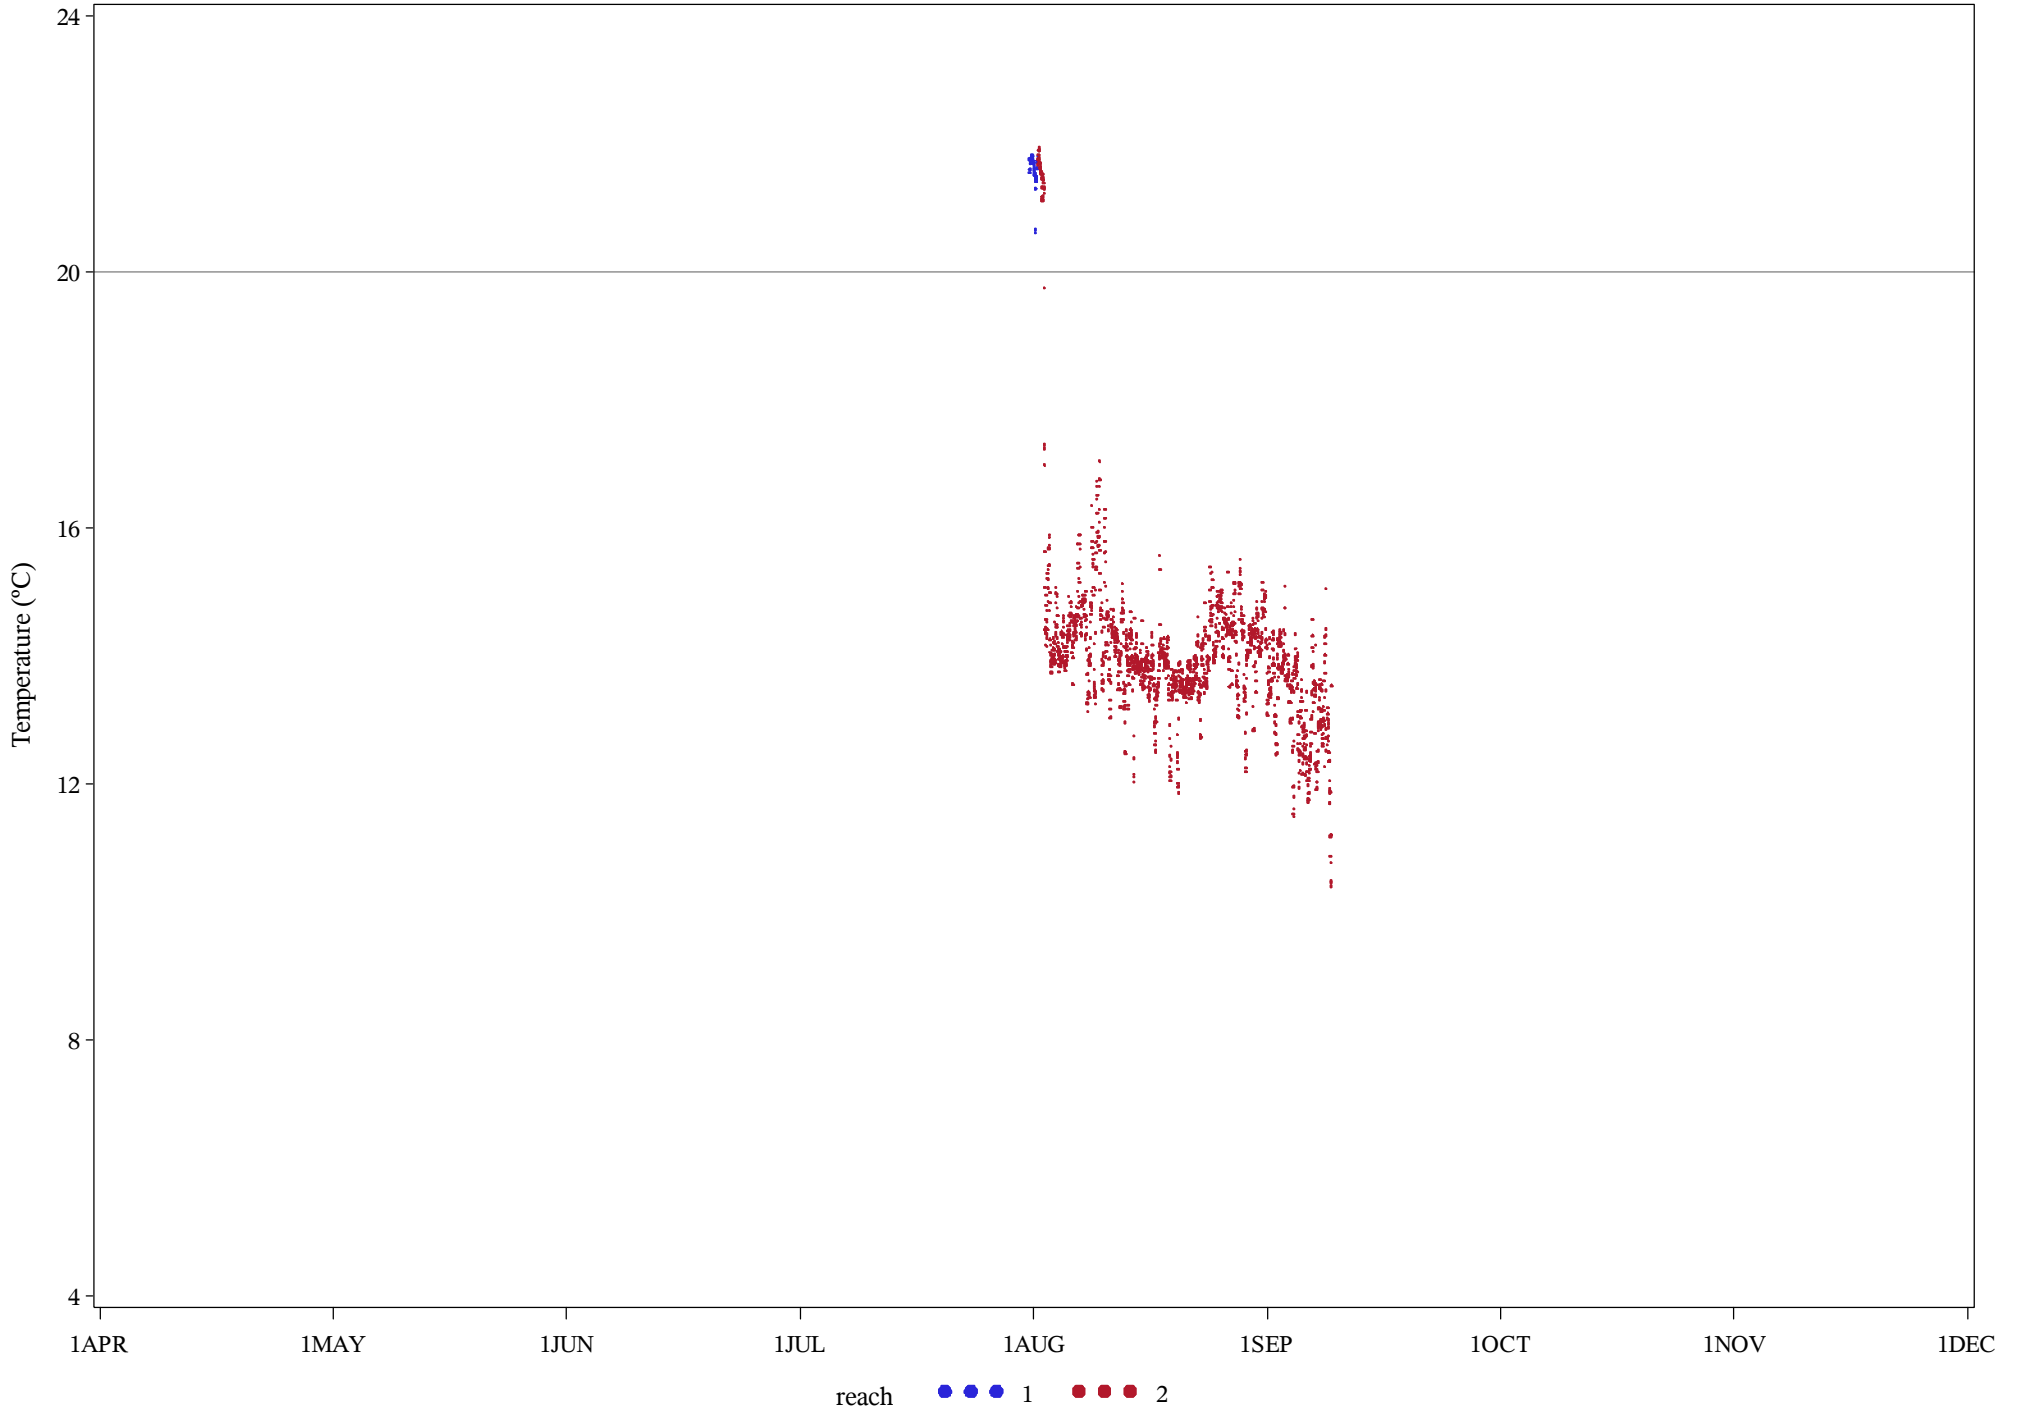

# Steelhead 2640C

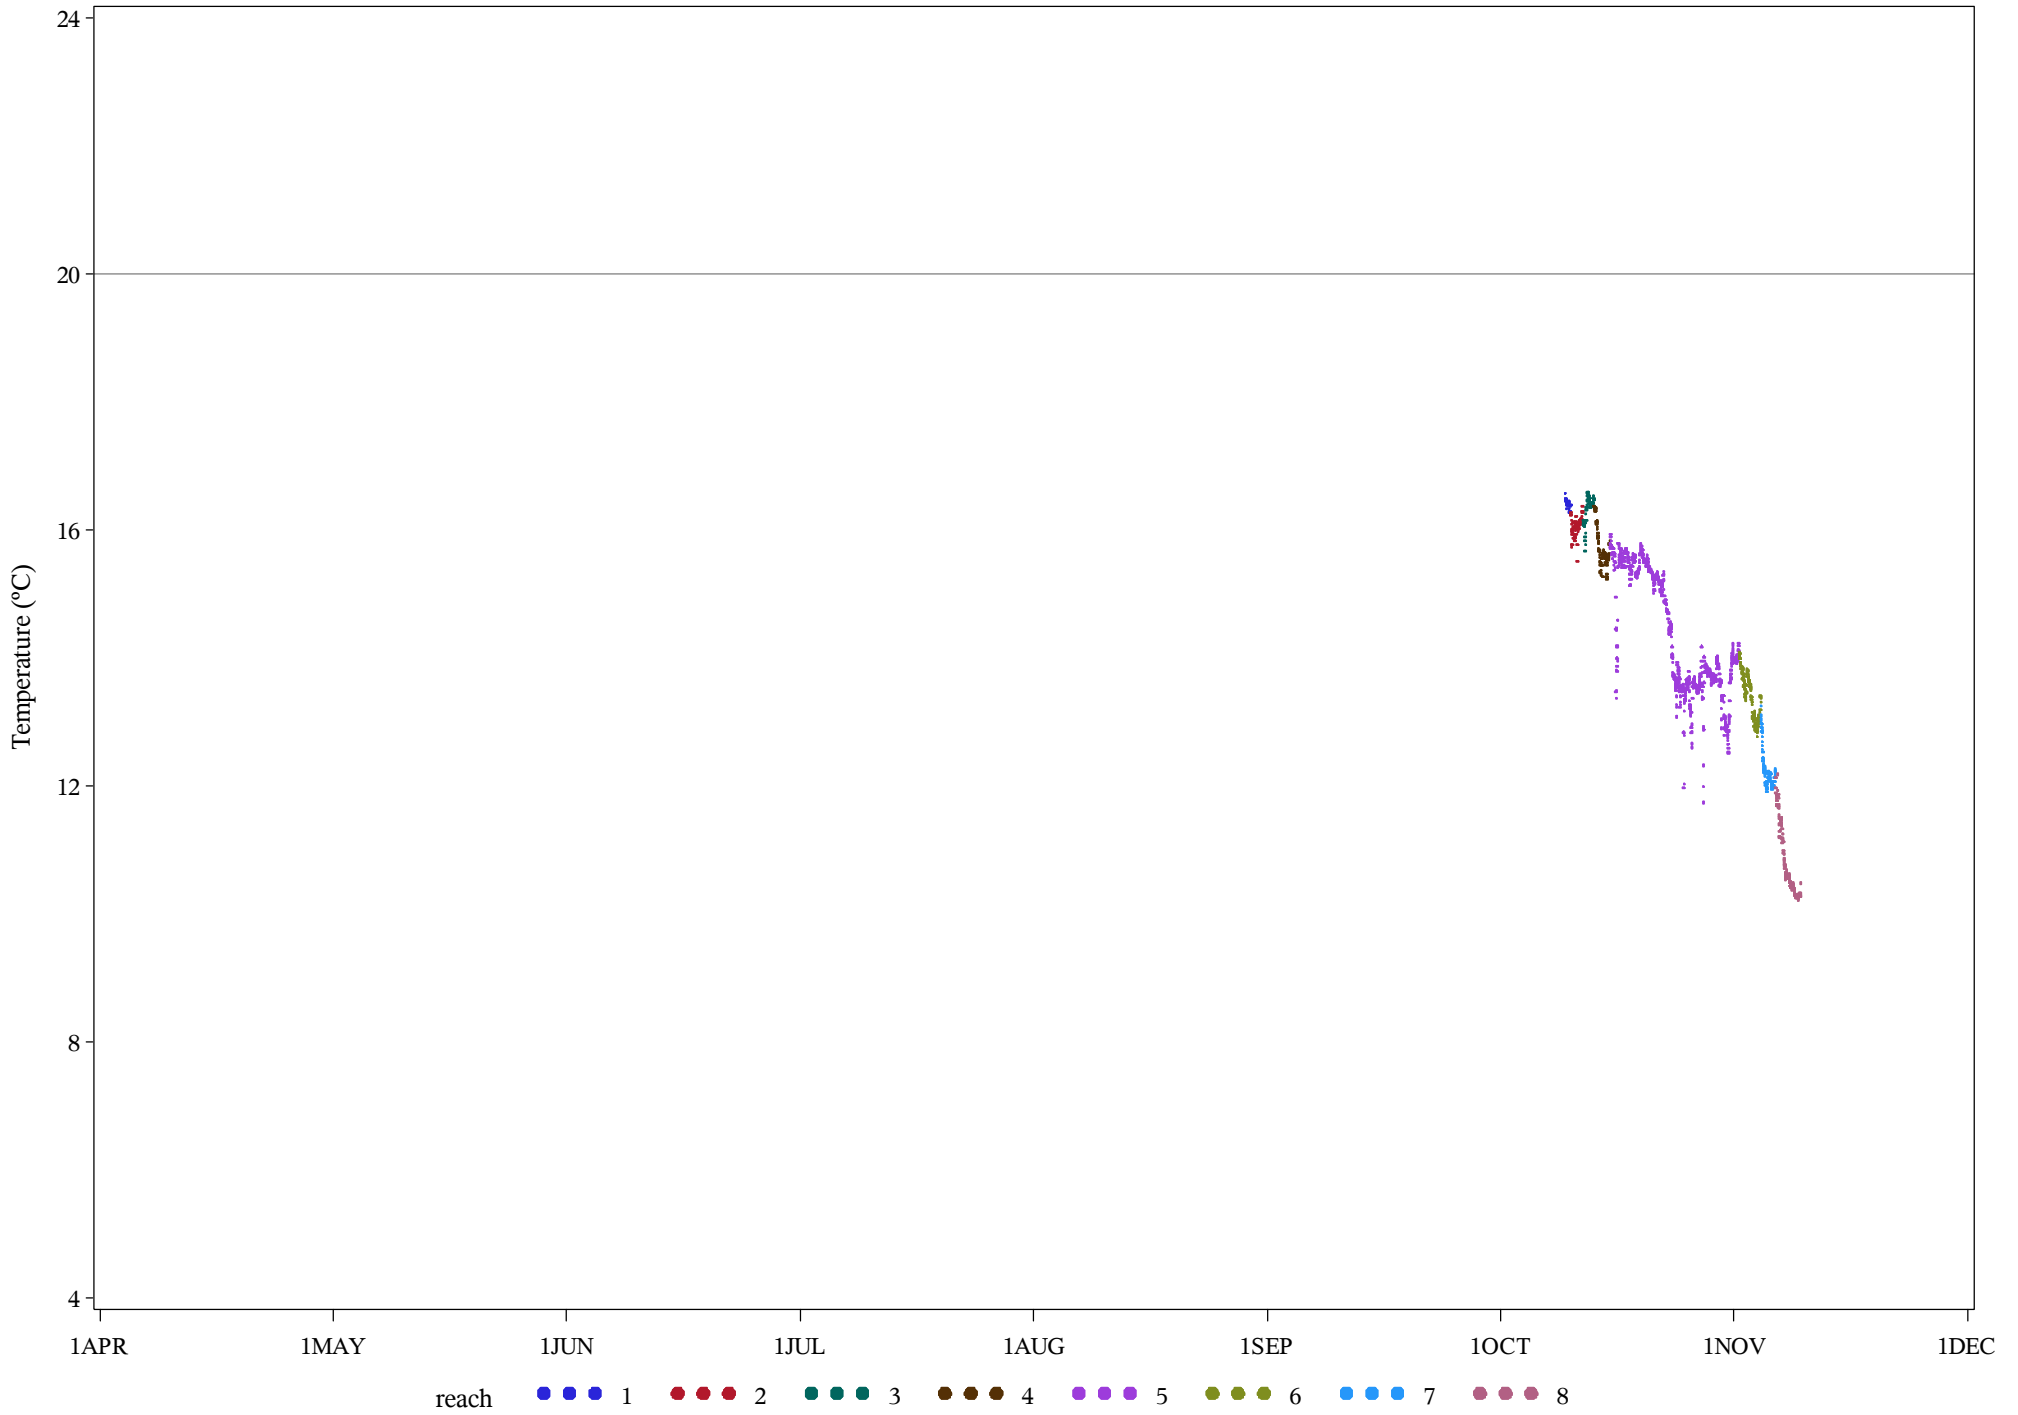

# Steelhead 2645B

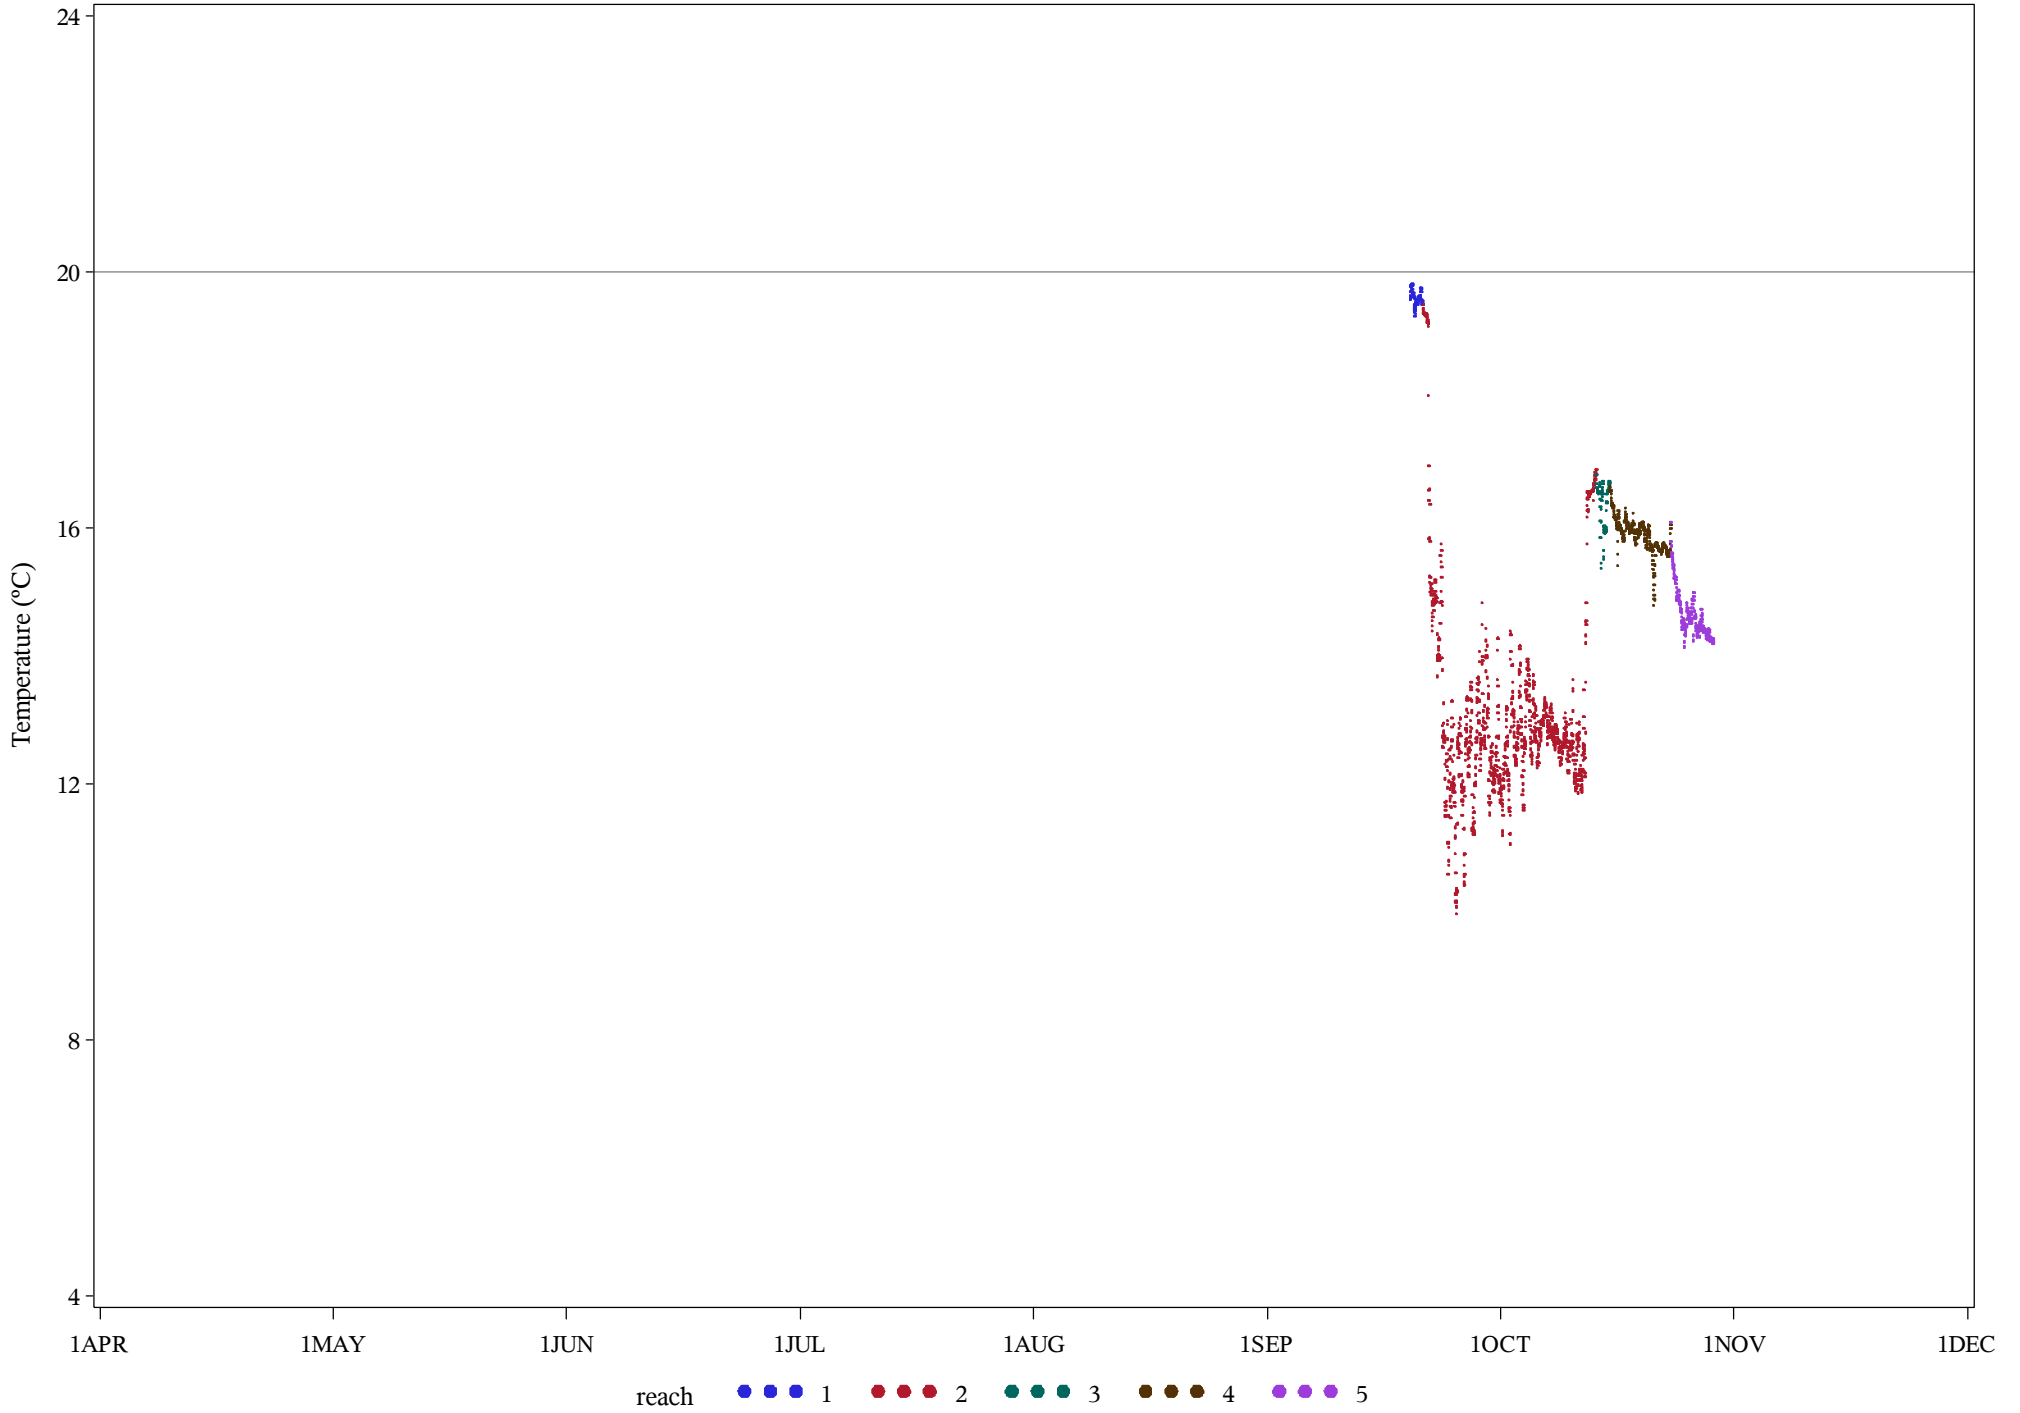







Steelhead  
2758B

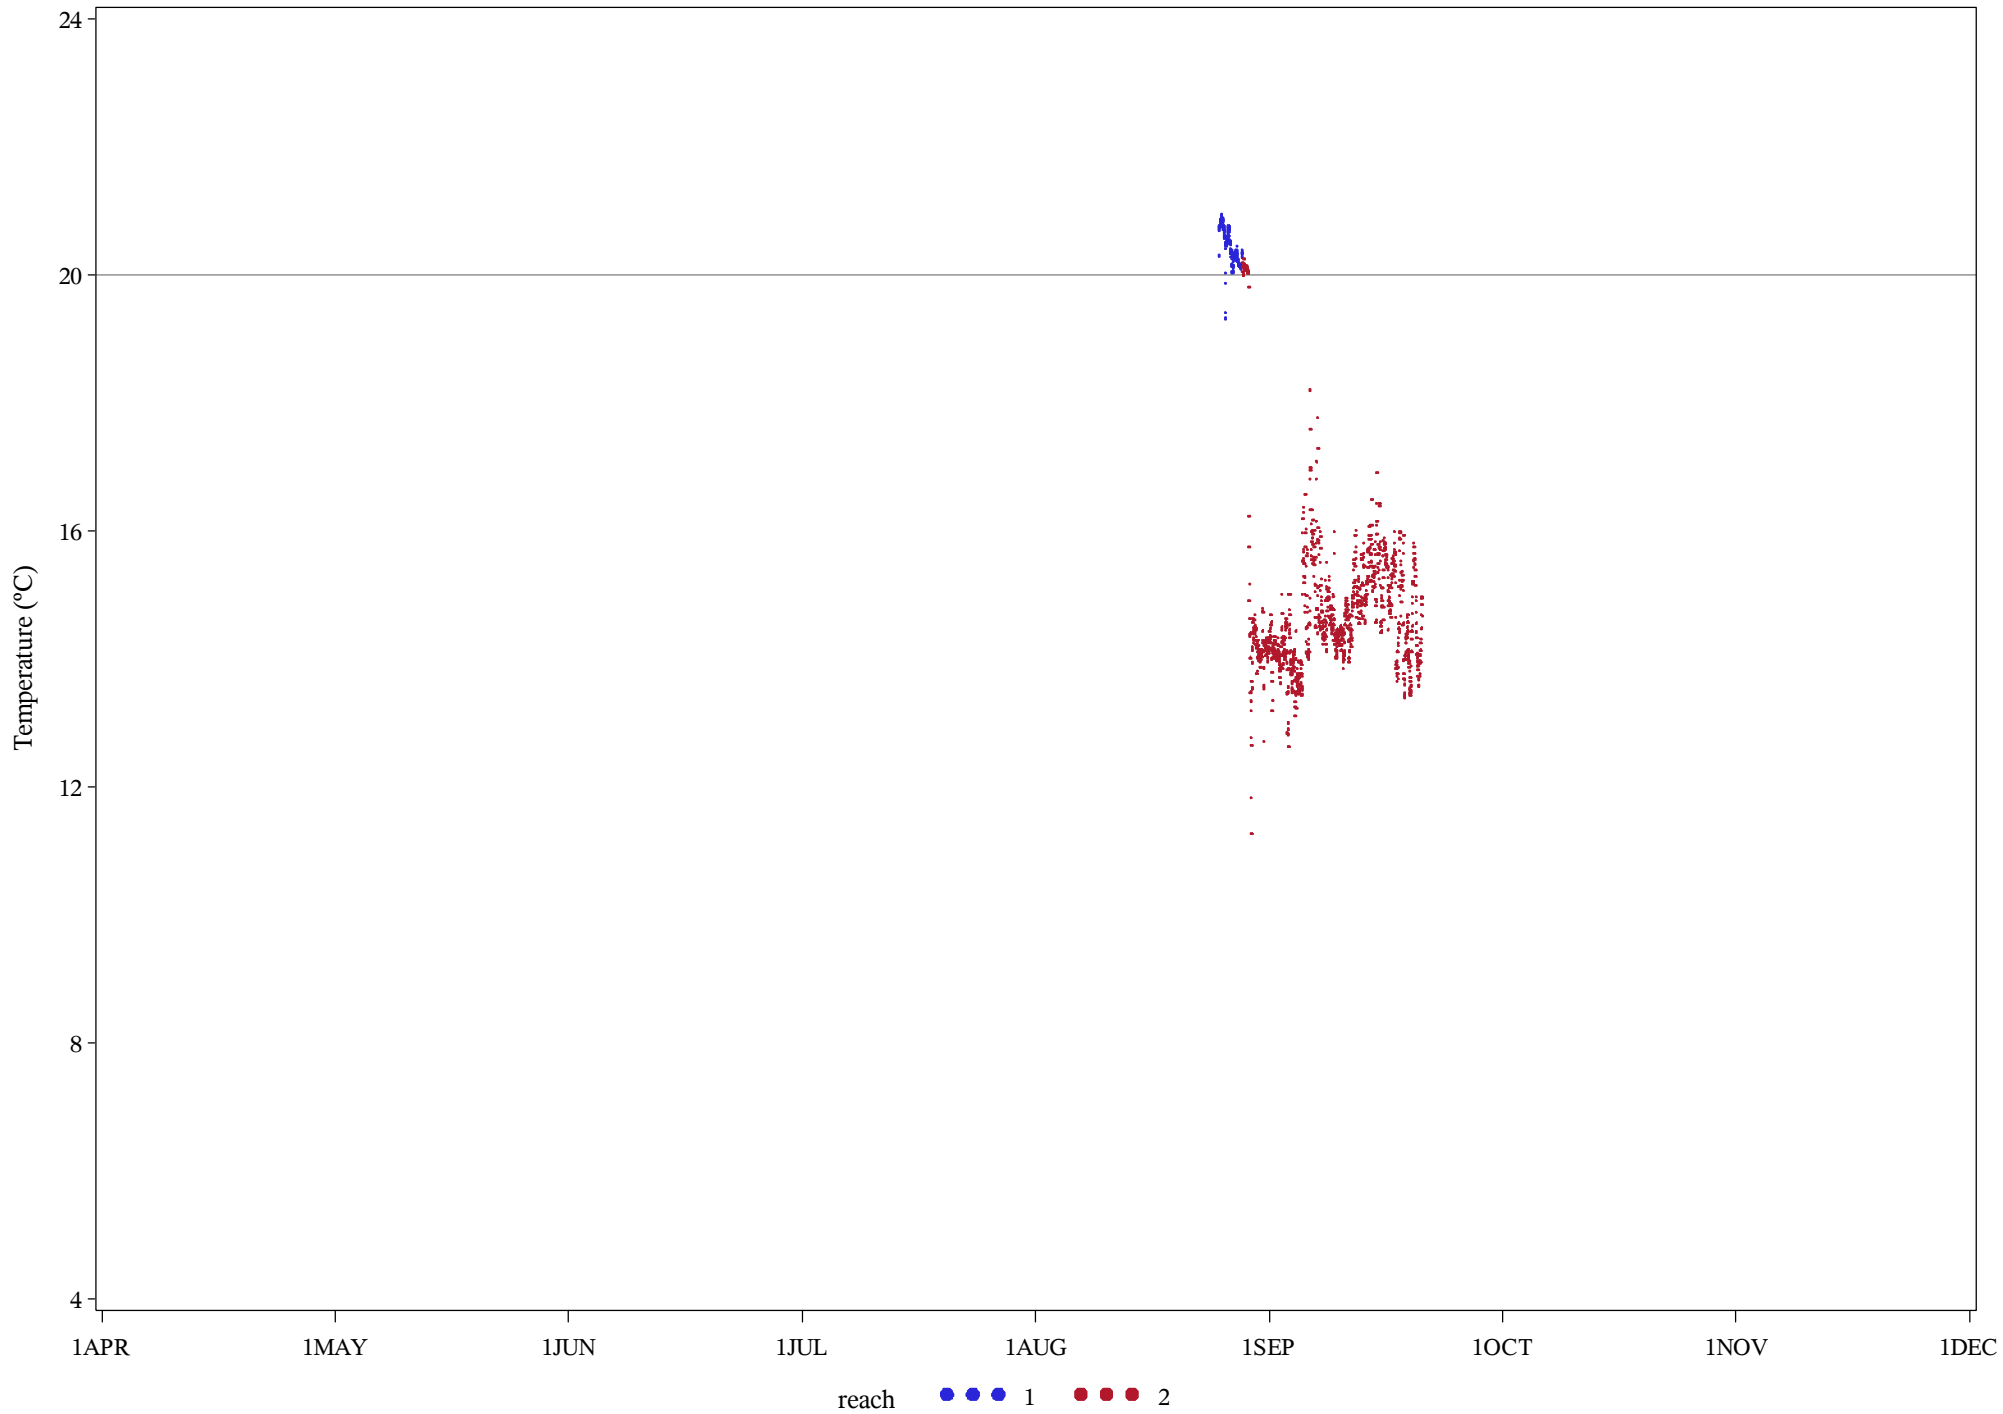

Steelhead  
2759B

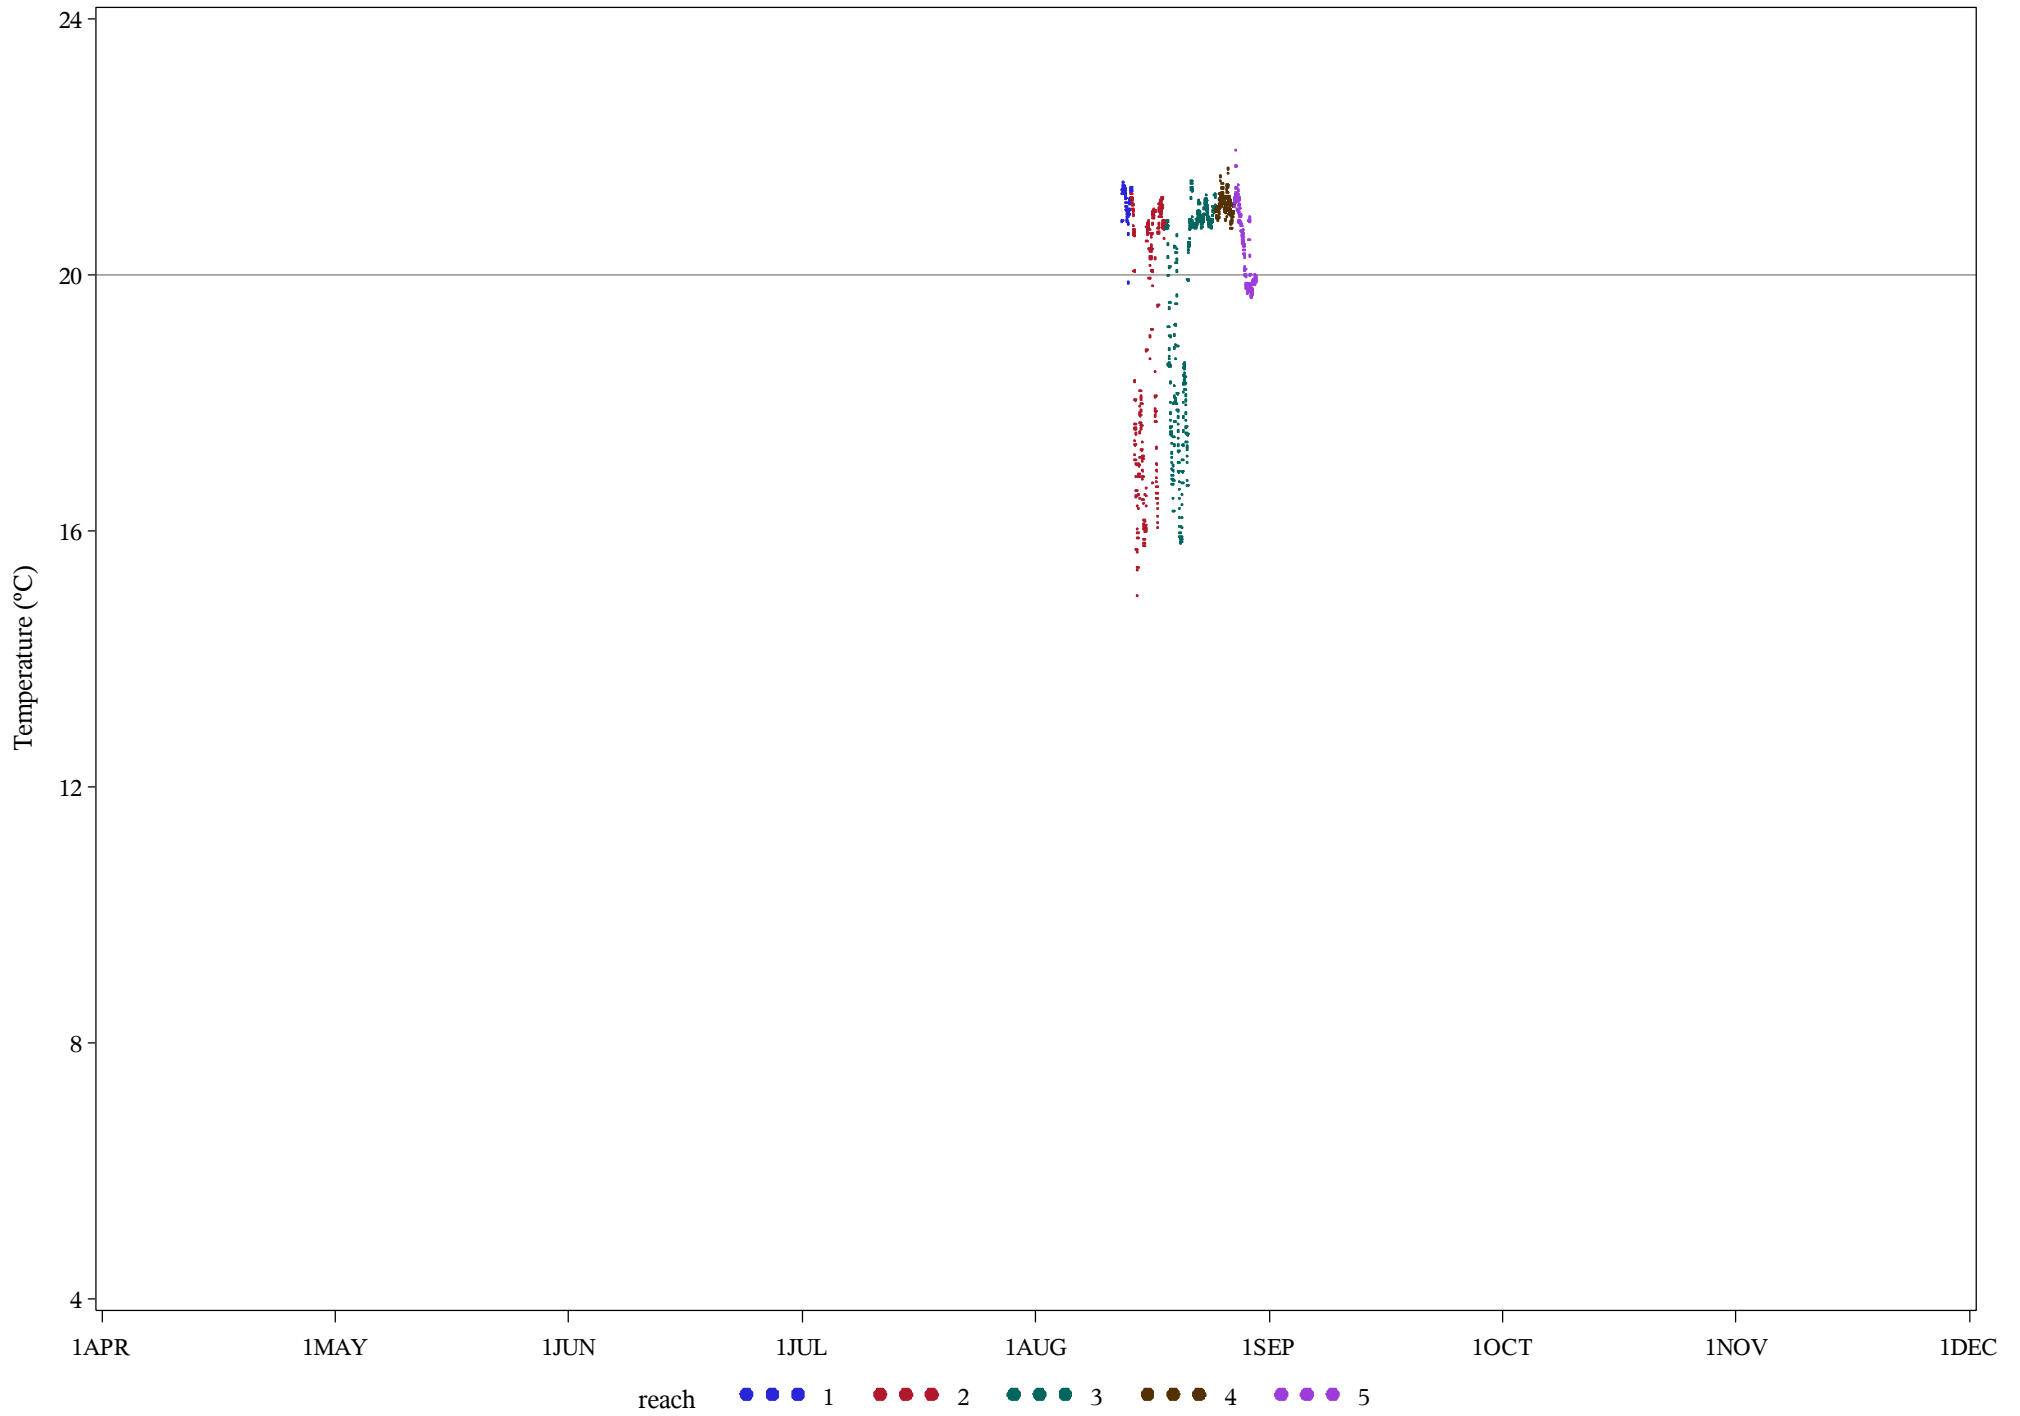

Steelhead  
2762B

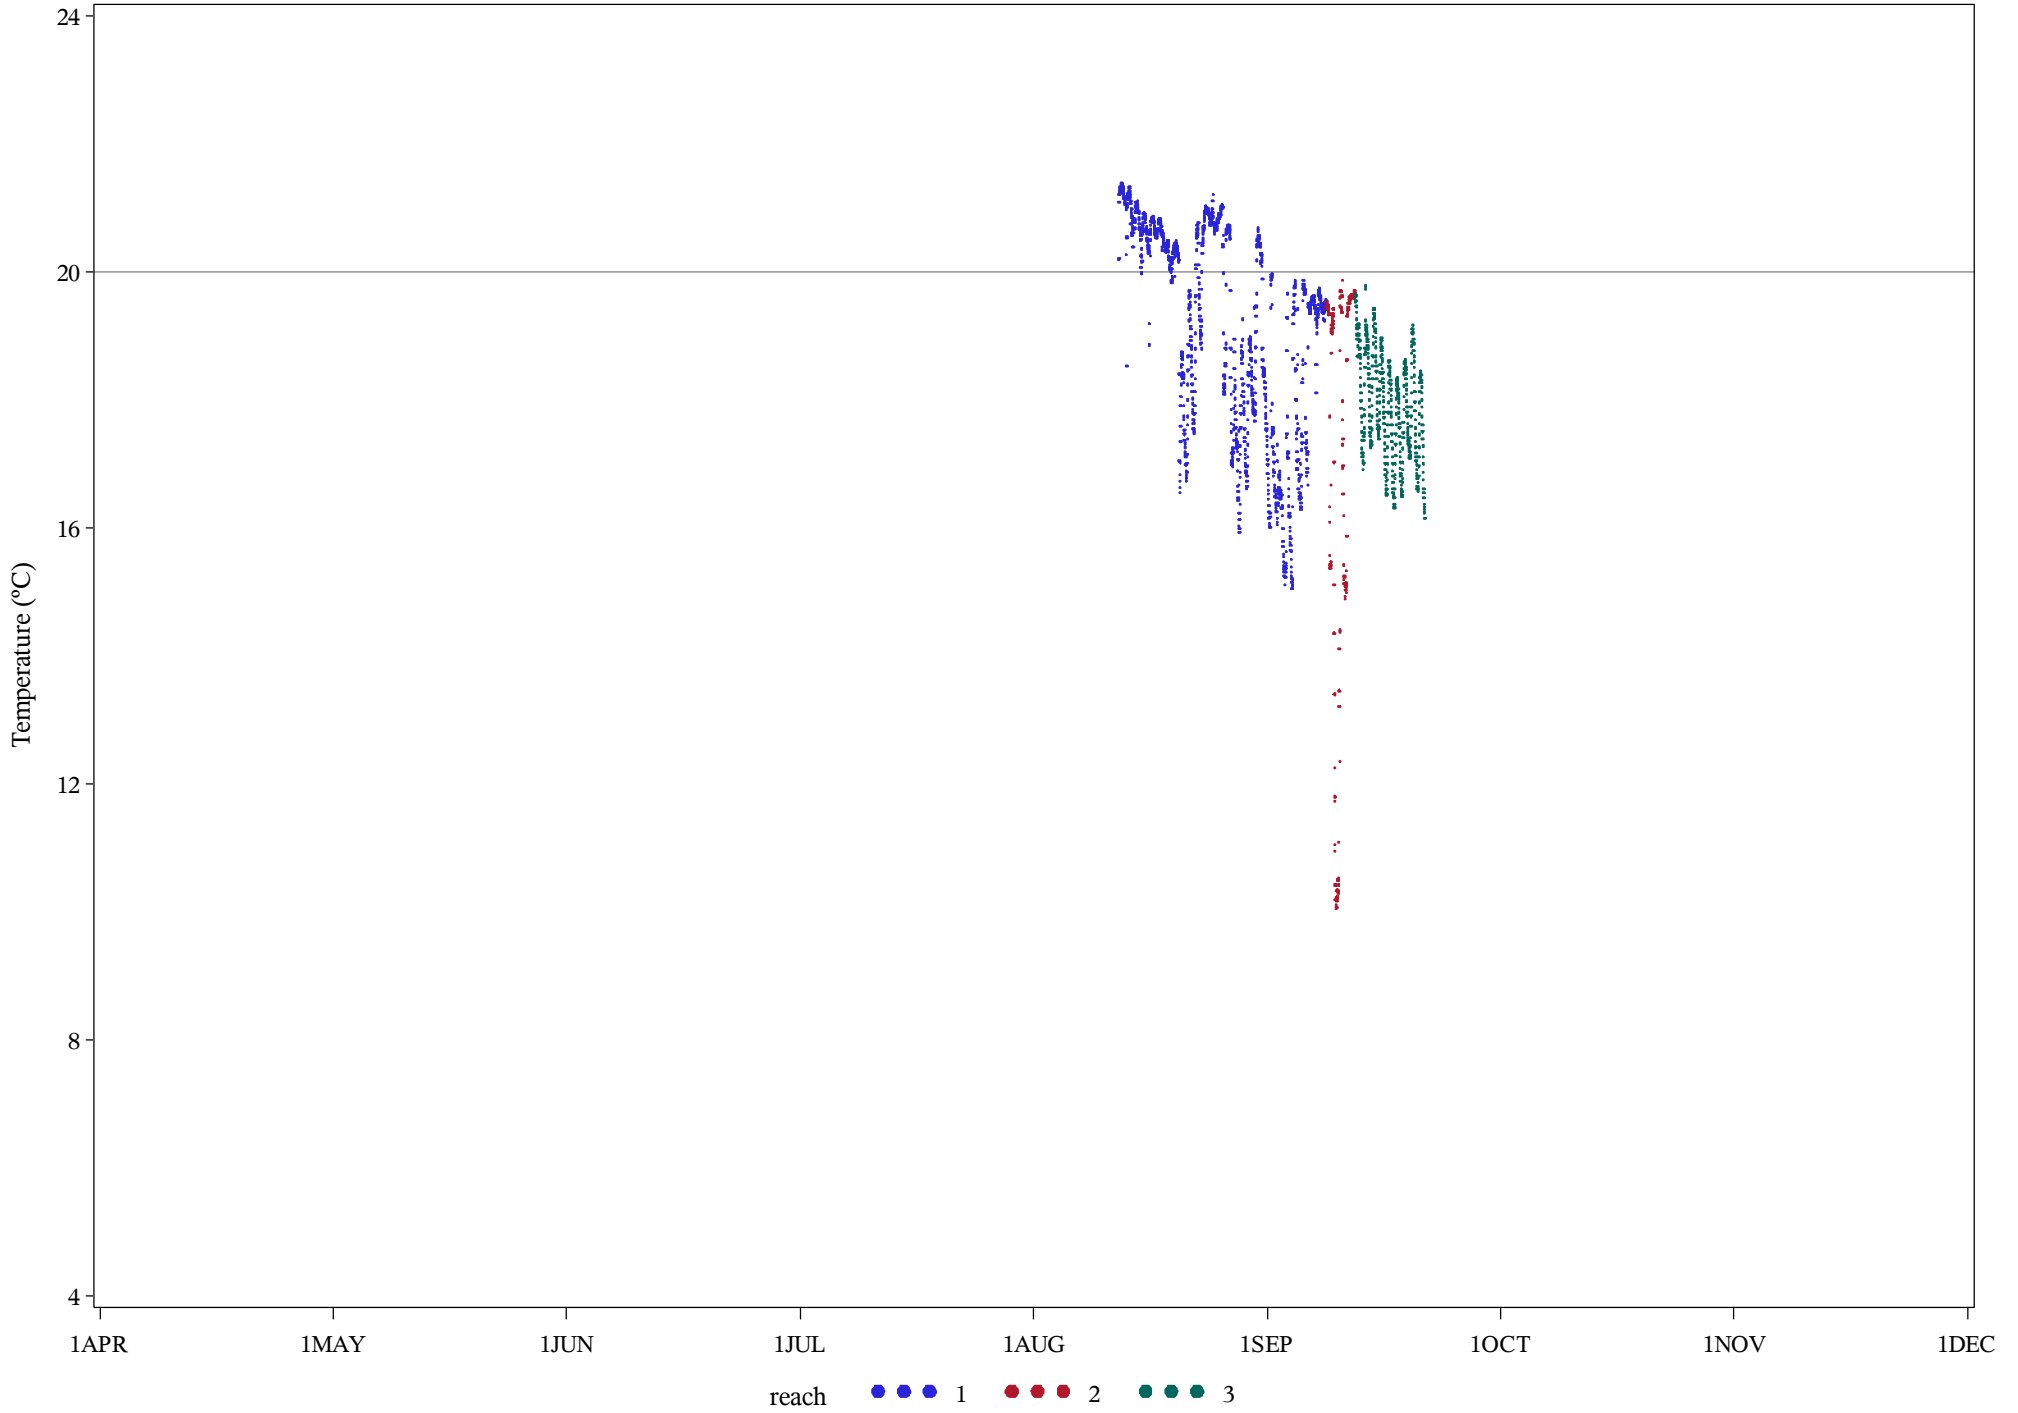

# Steelhead 2787B

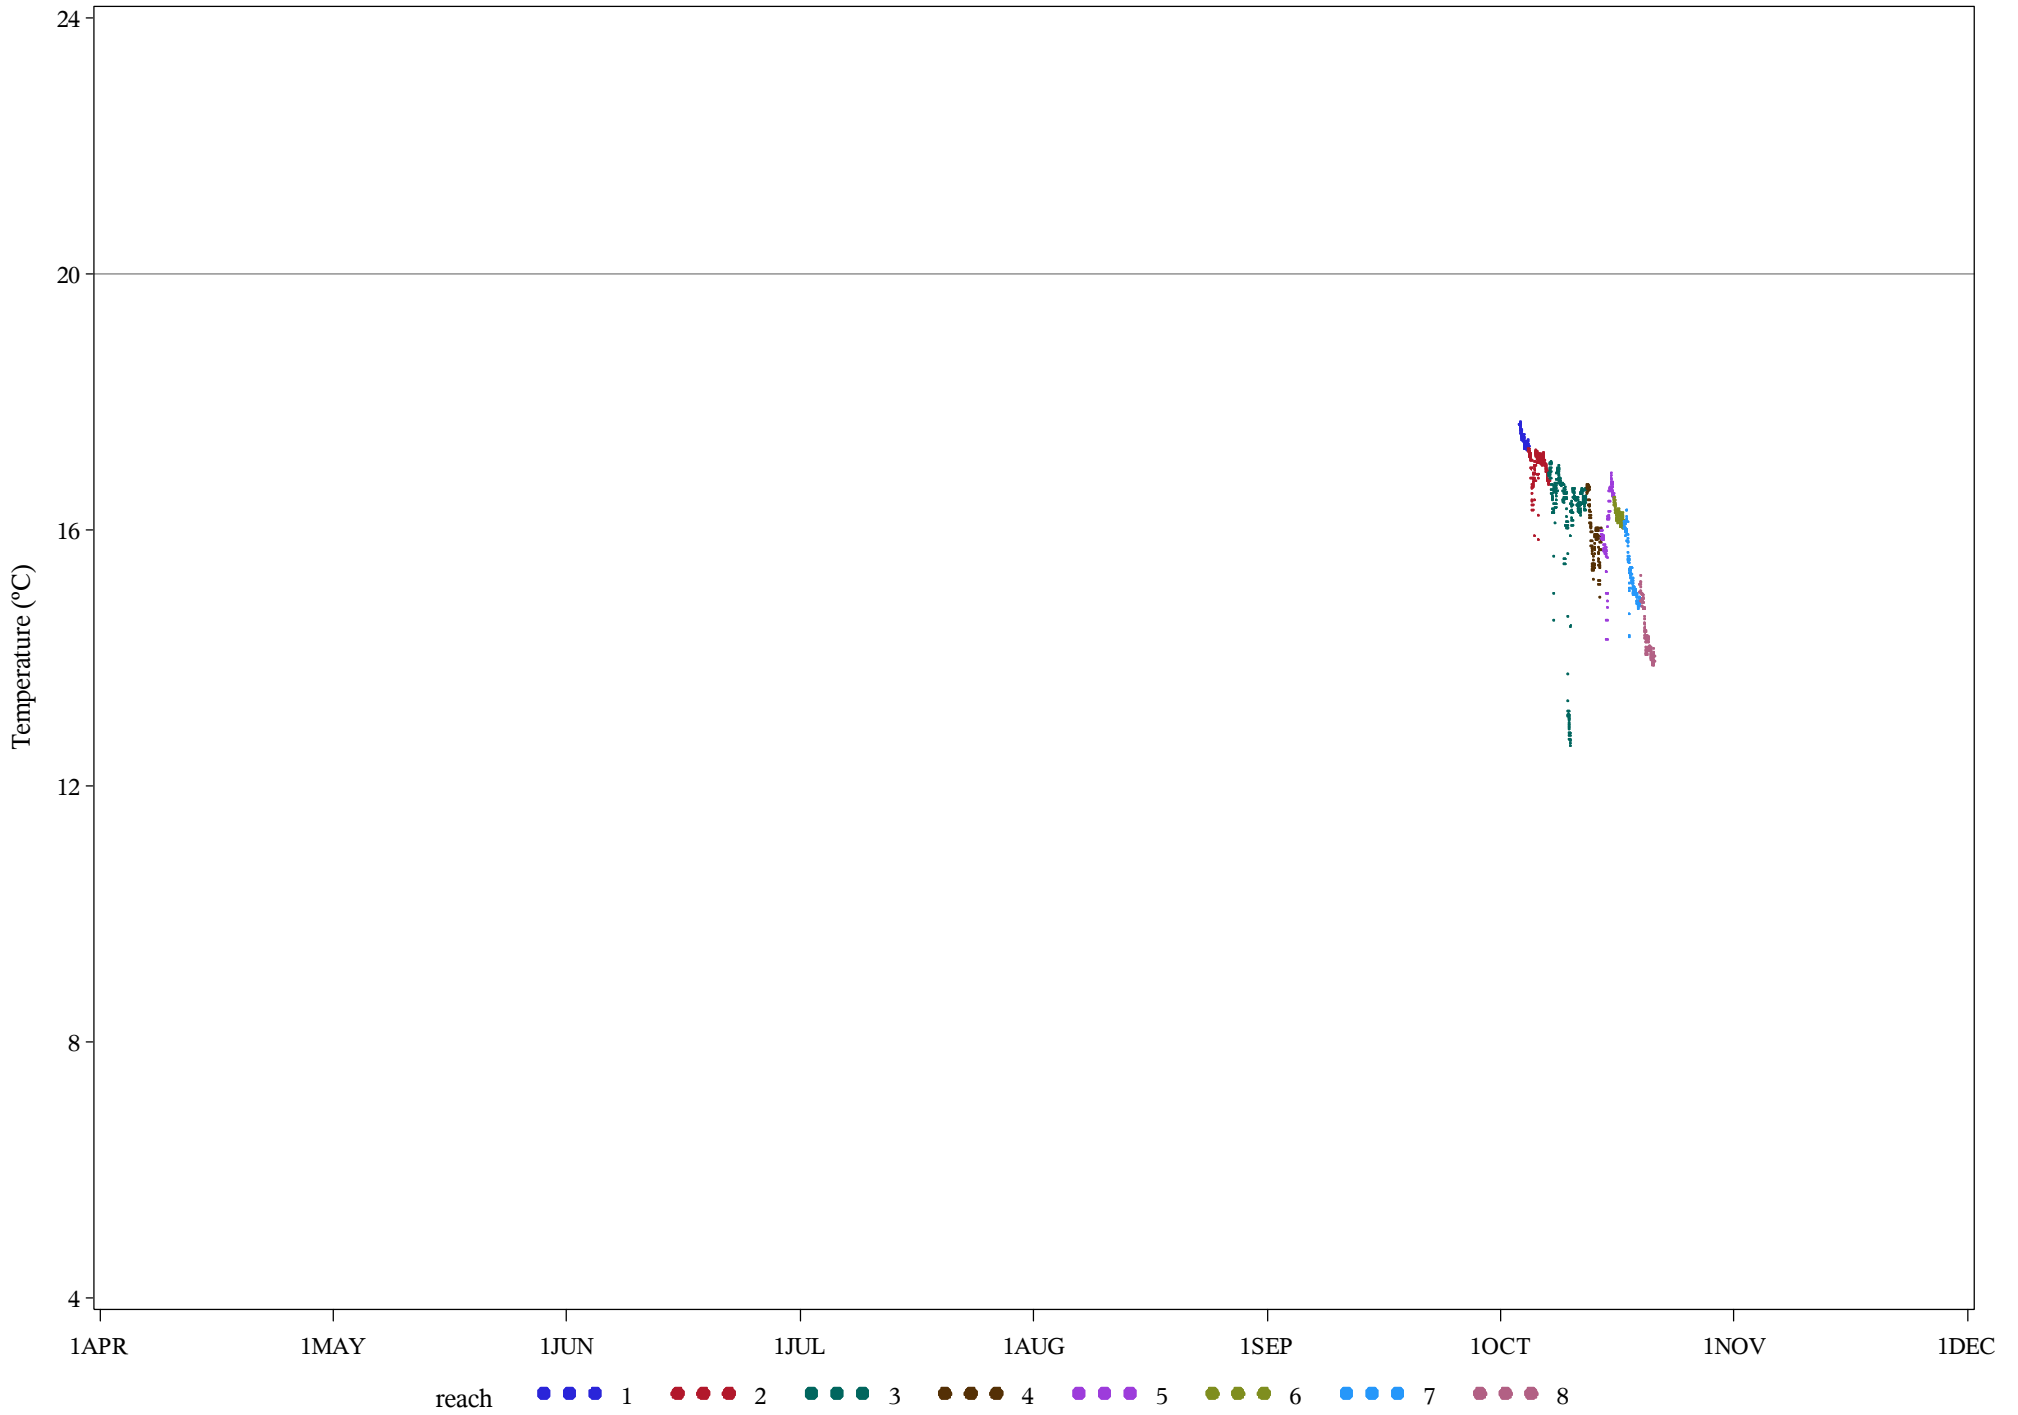

Steelhead  
2797A

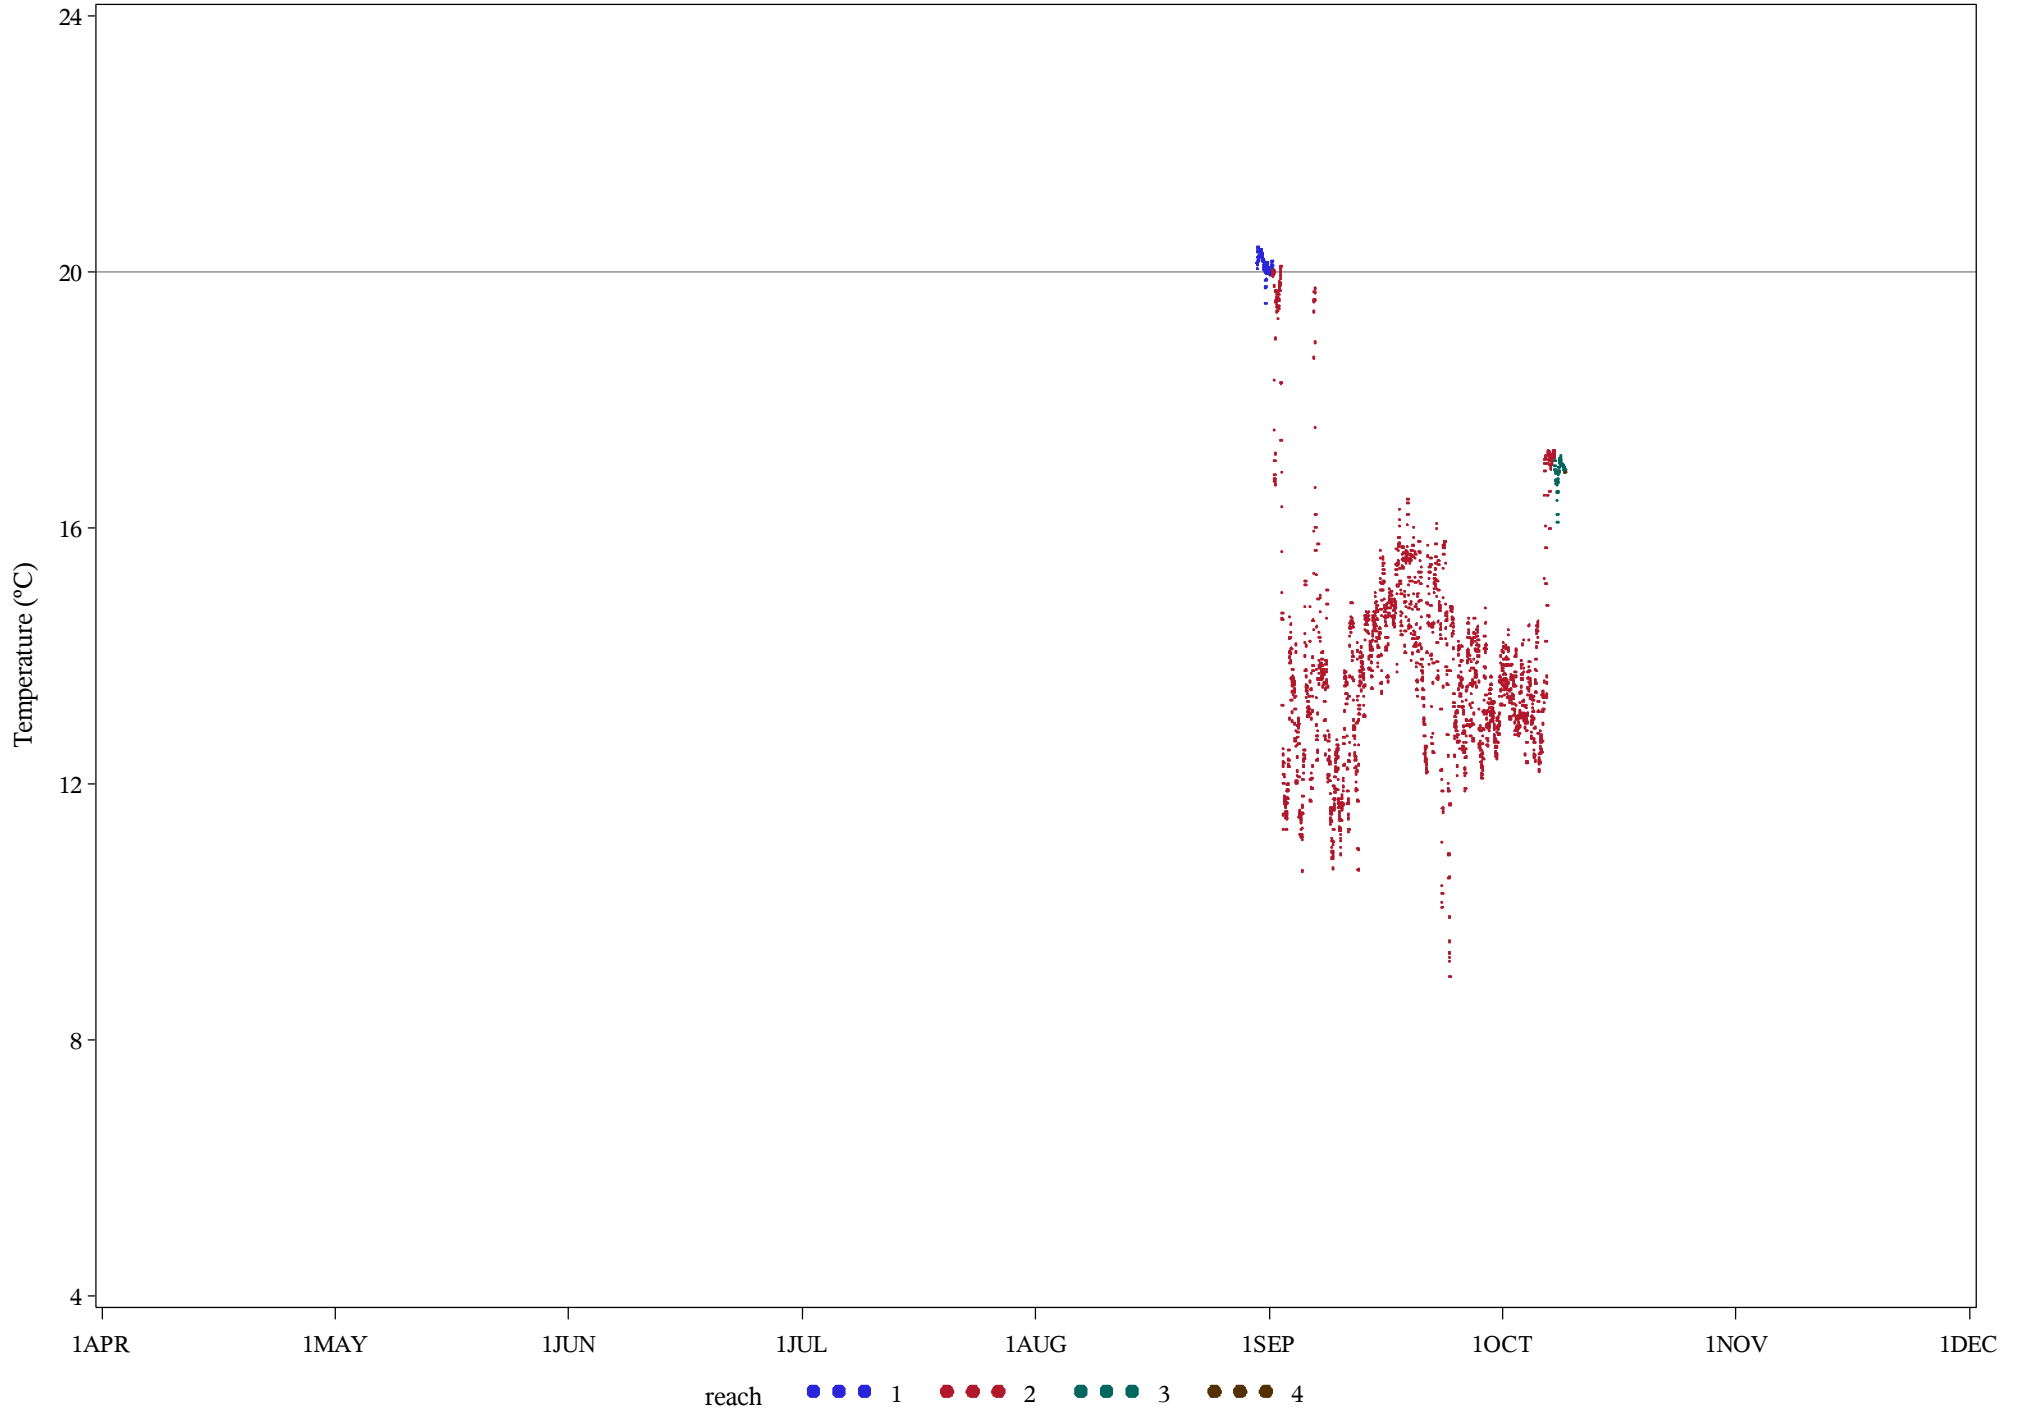





# Steelhead 2807C

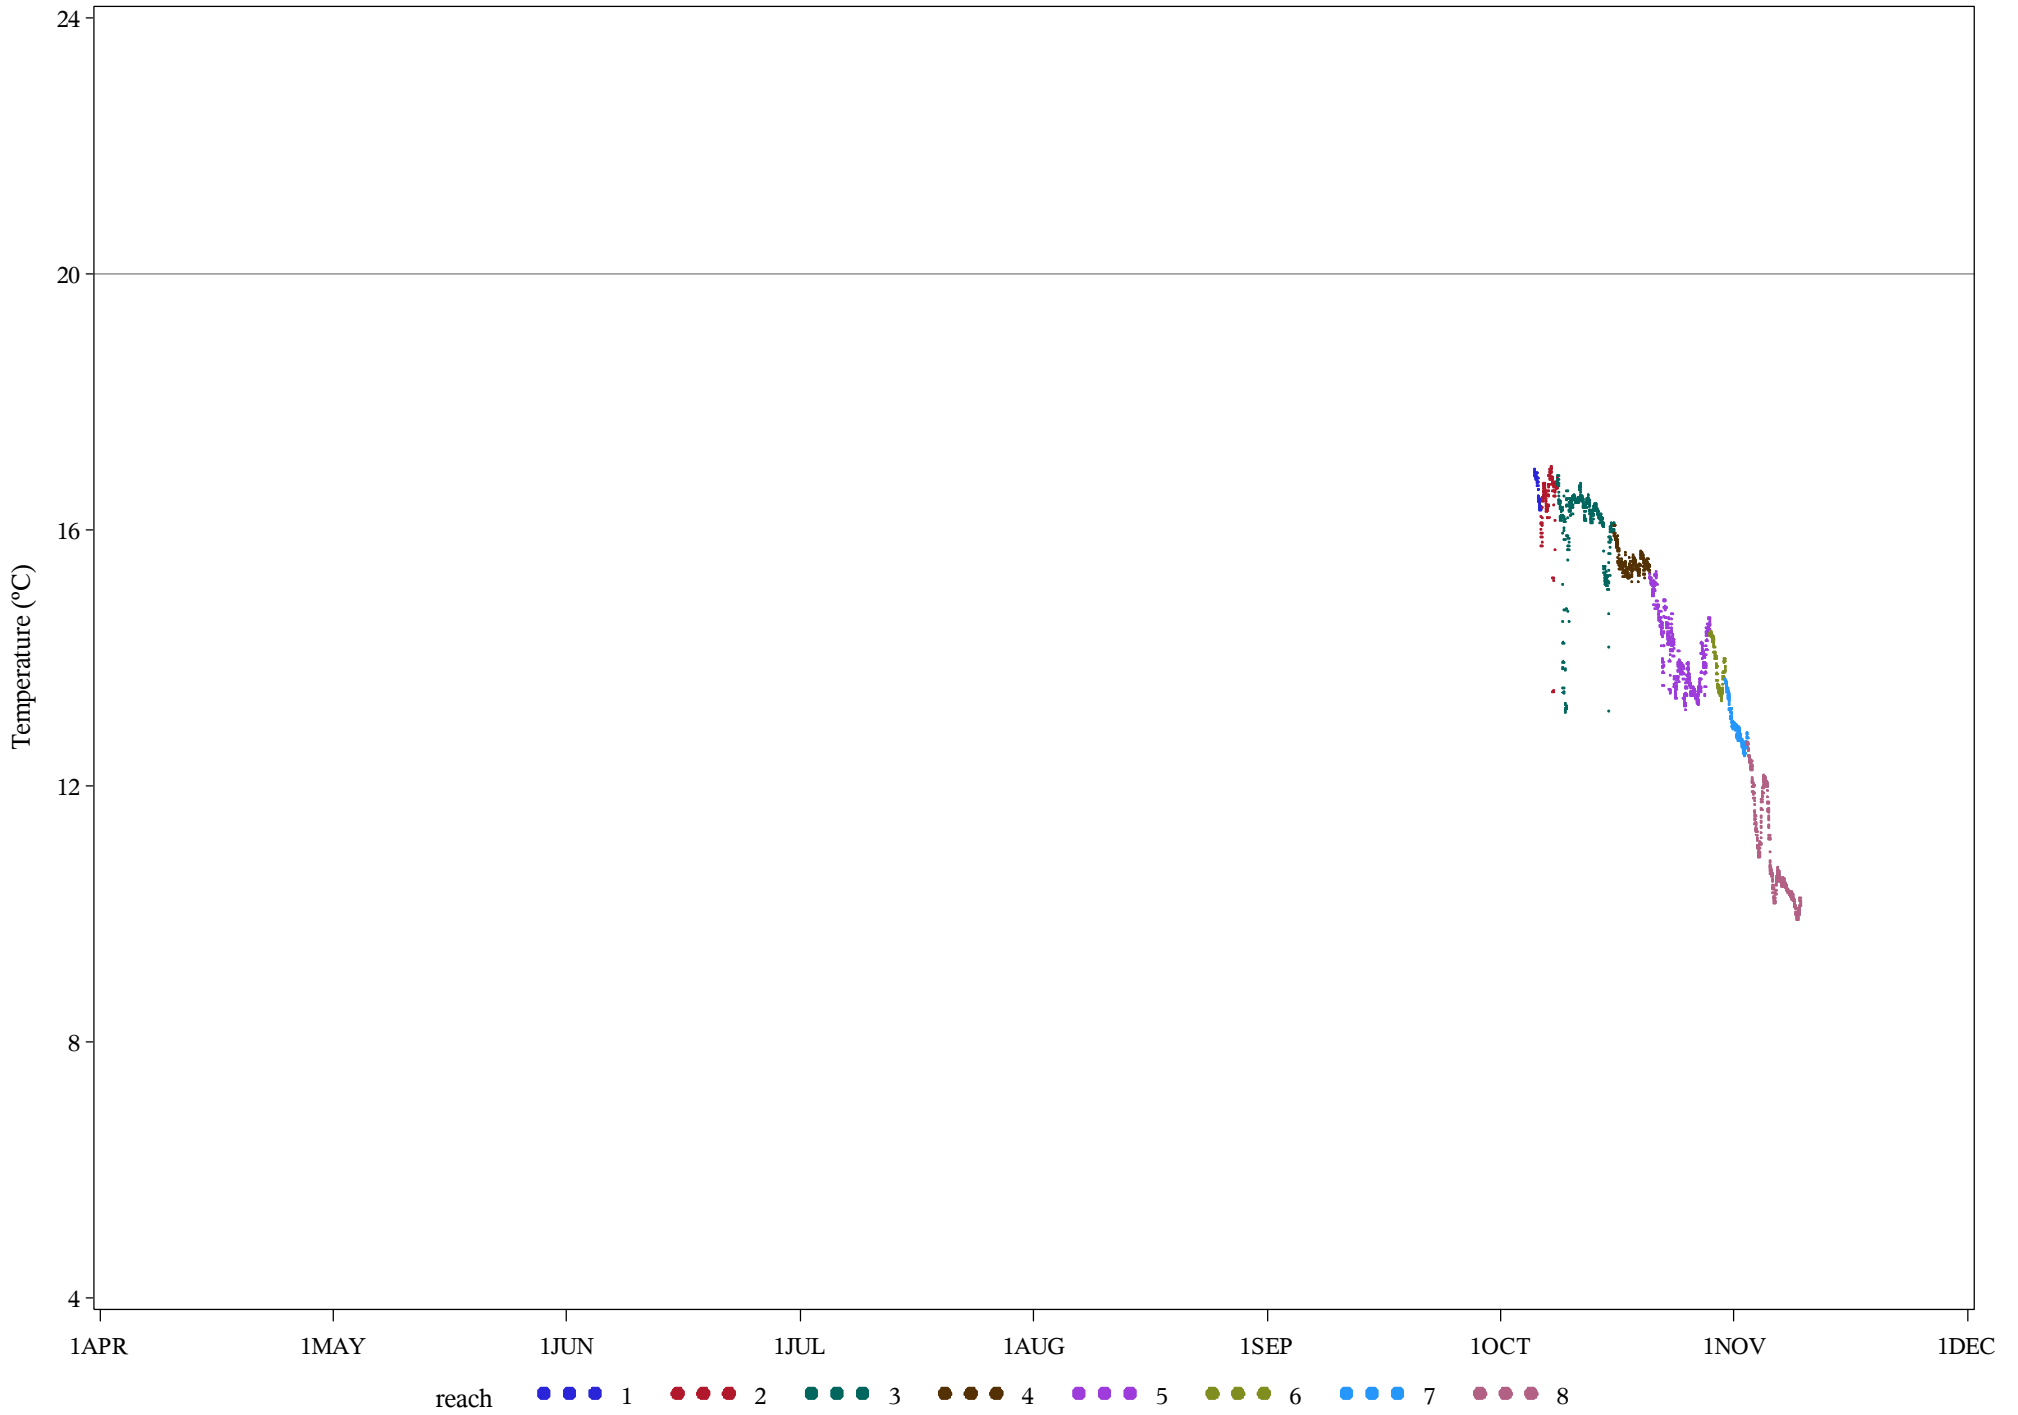

# Steelhead 3002C

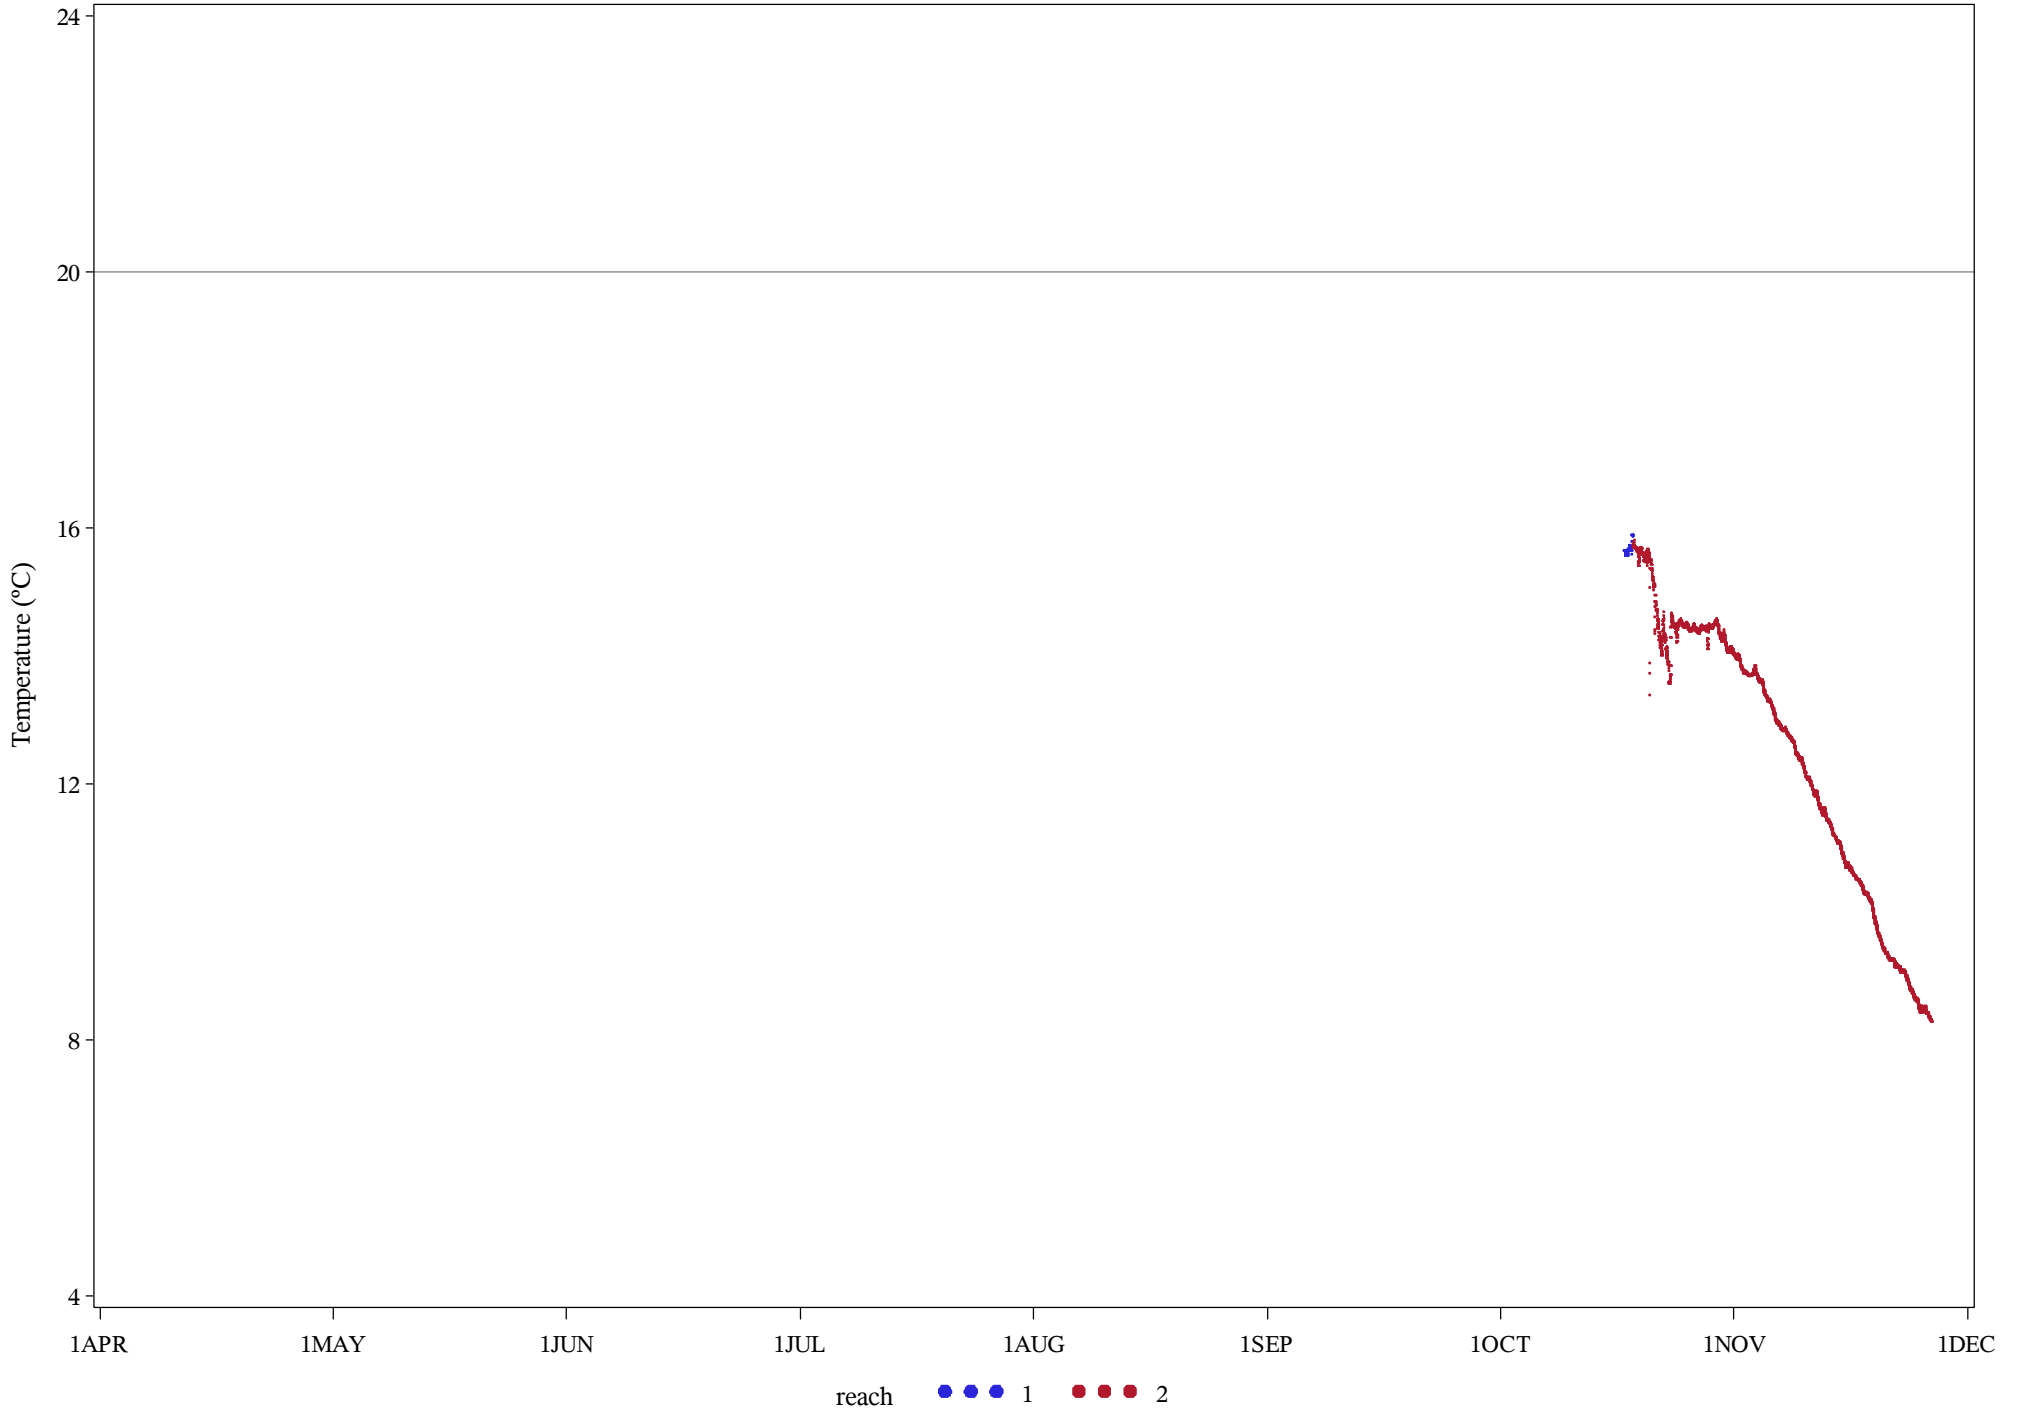

# Steelhead 3005A

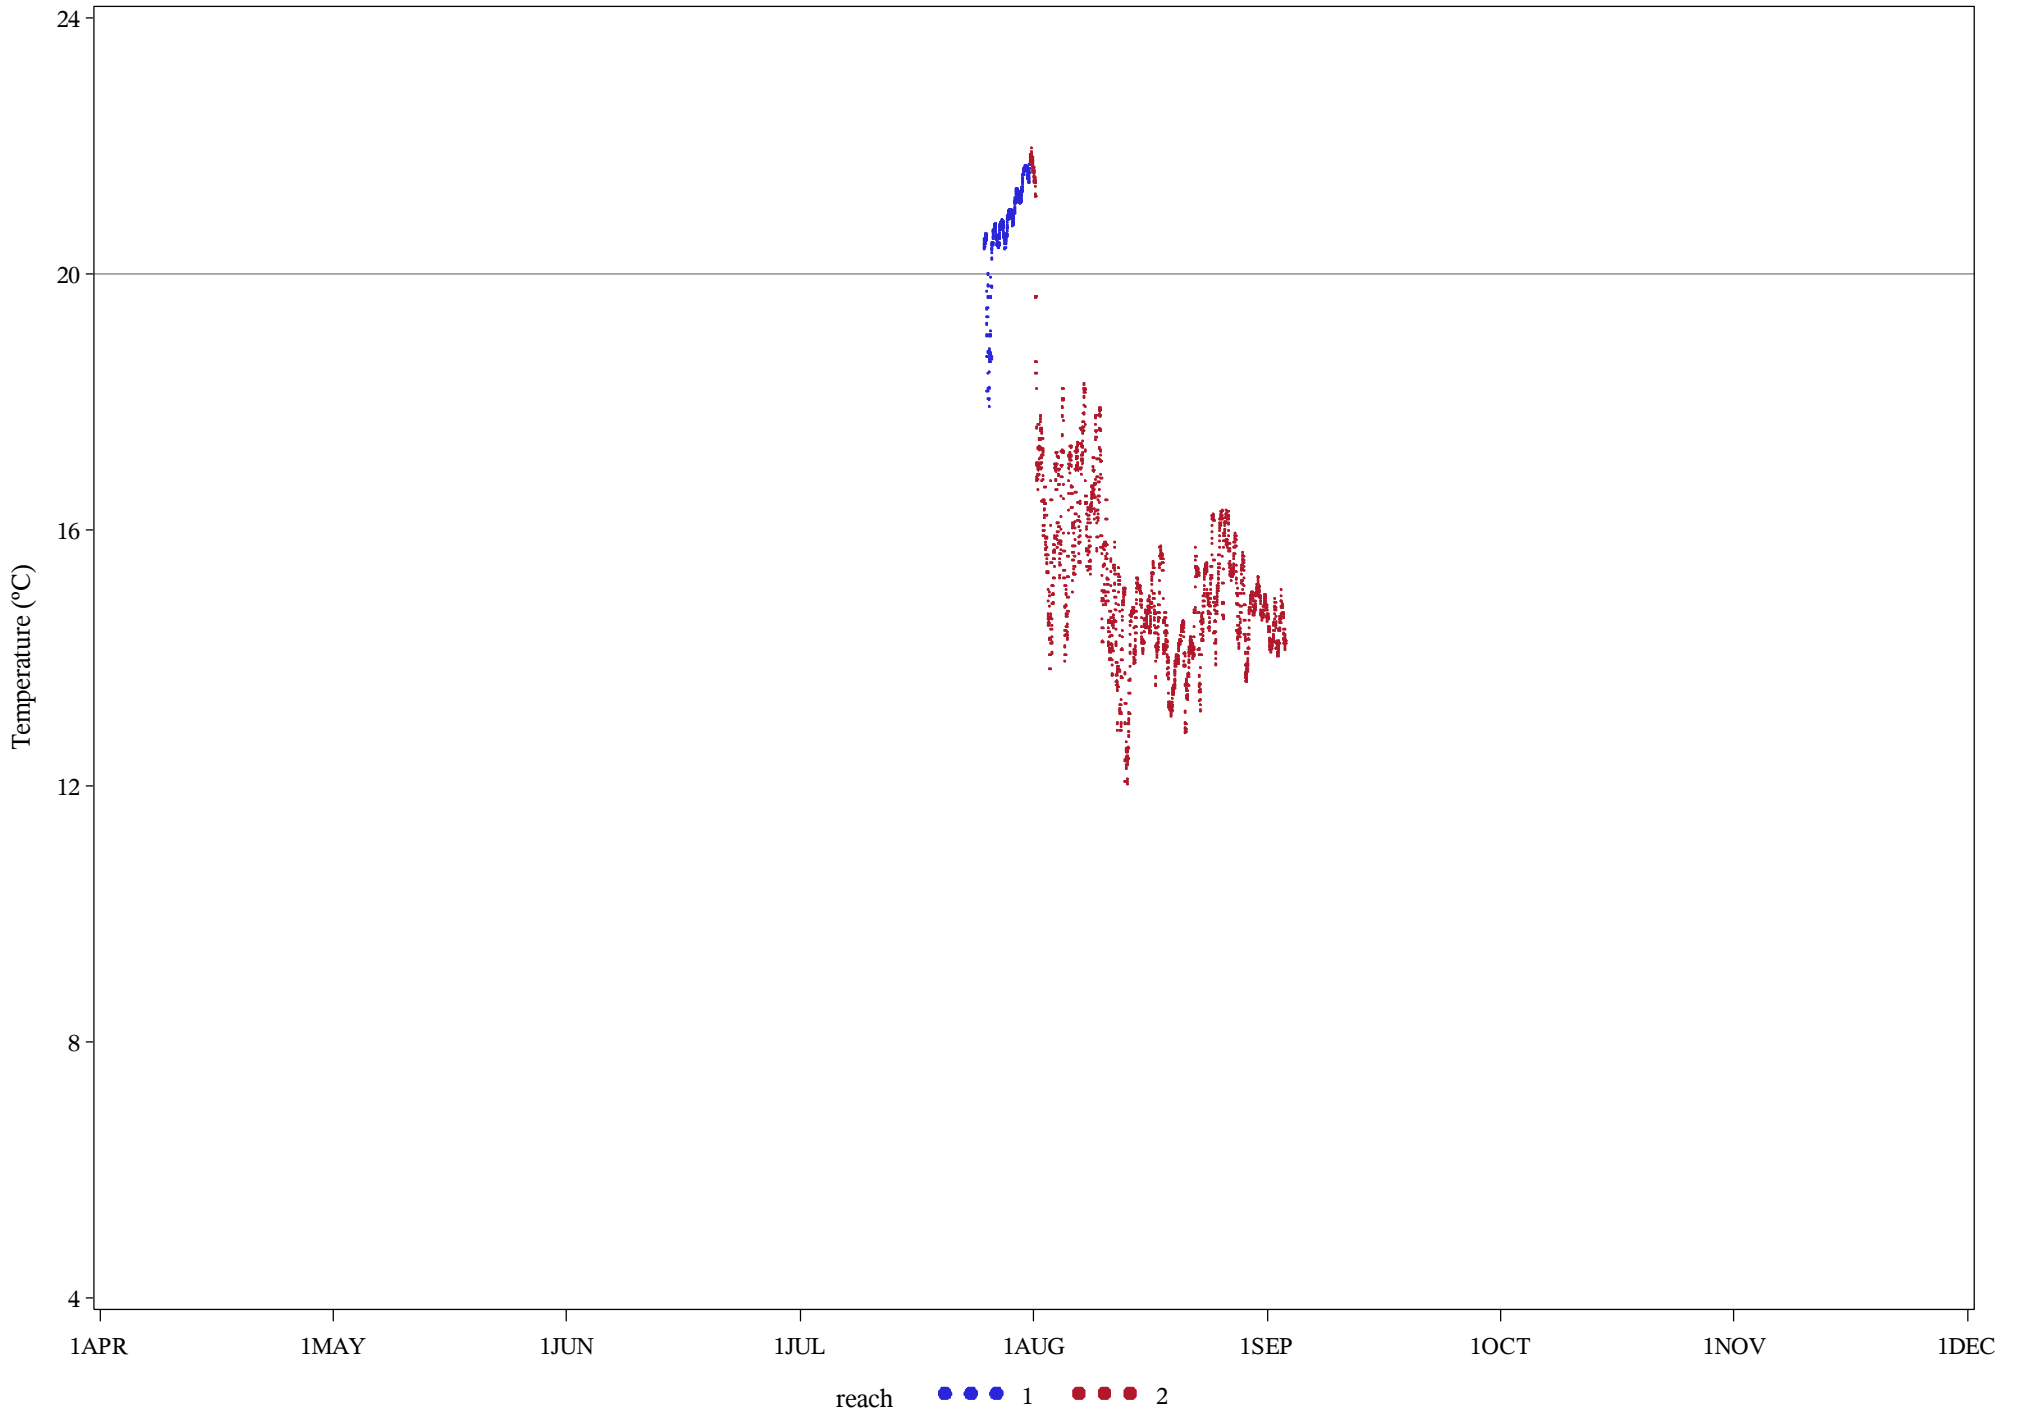



# Steelhead 3033B

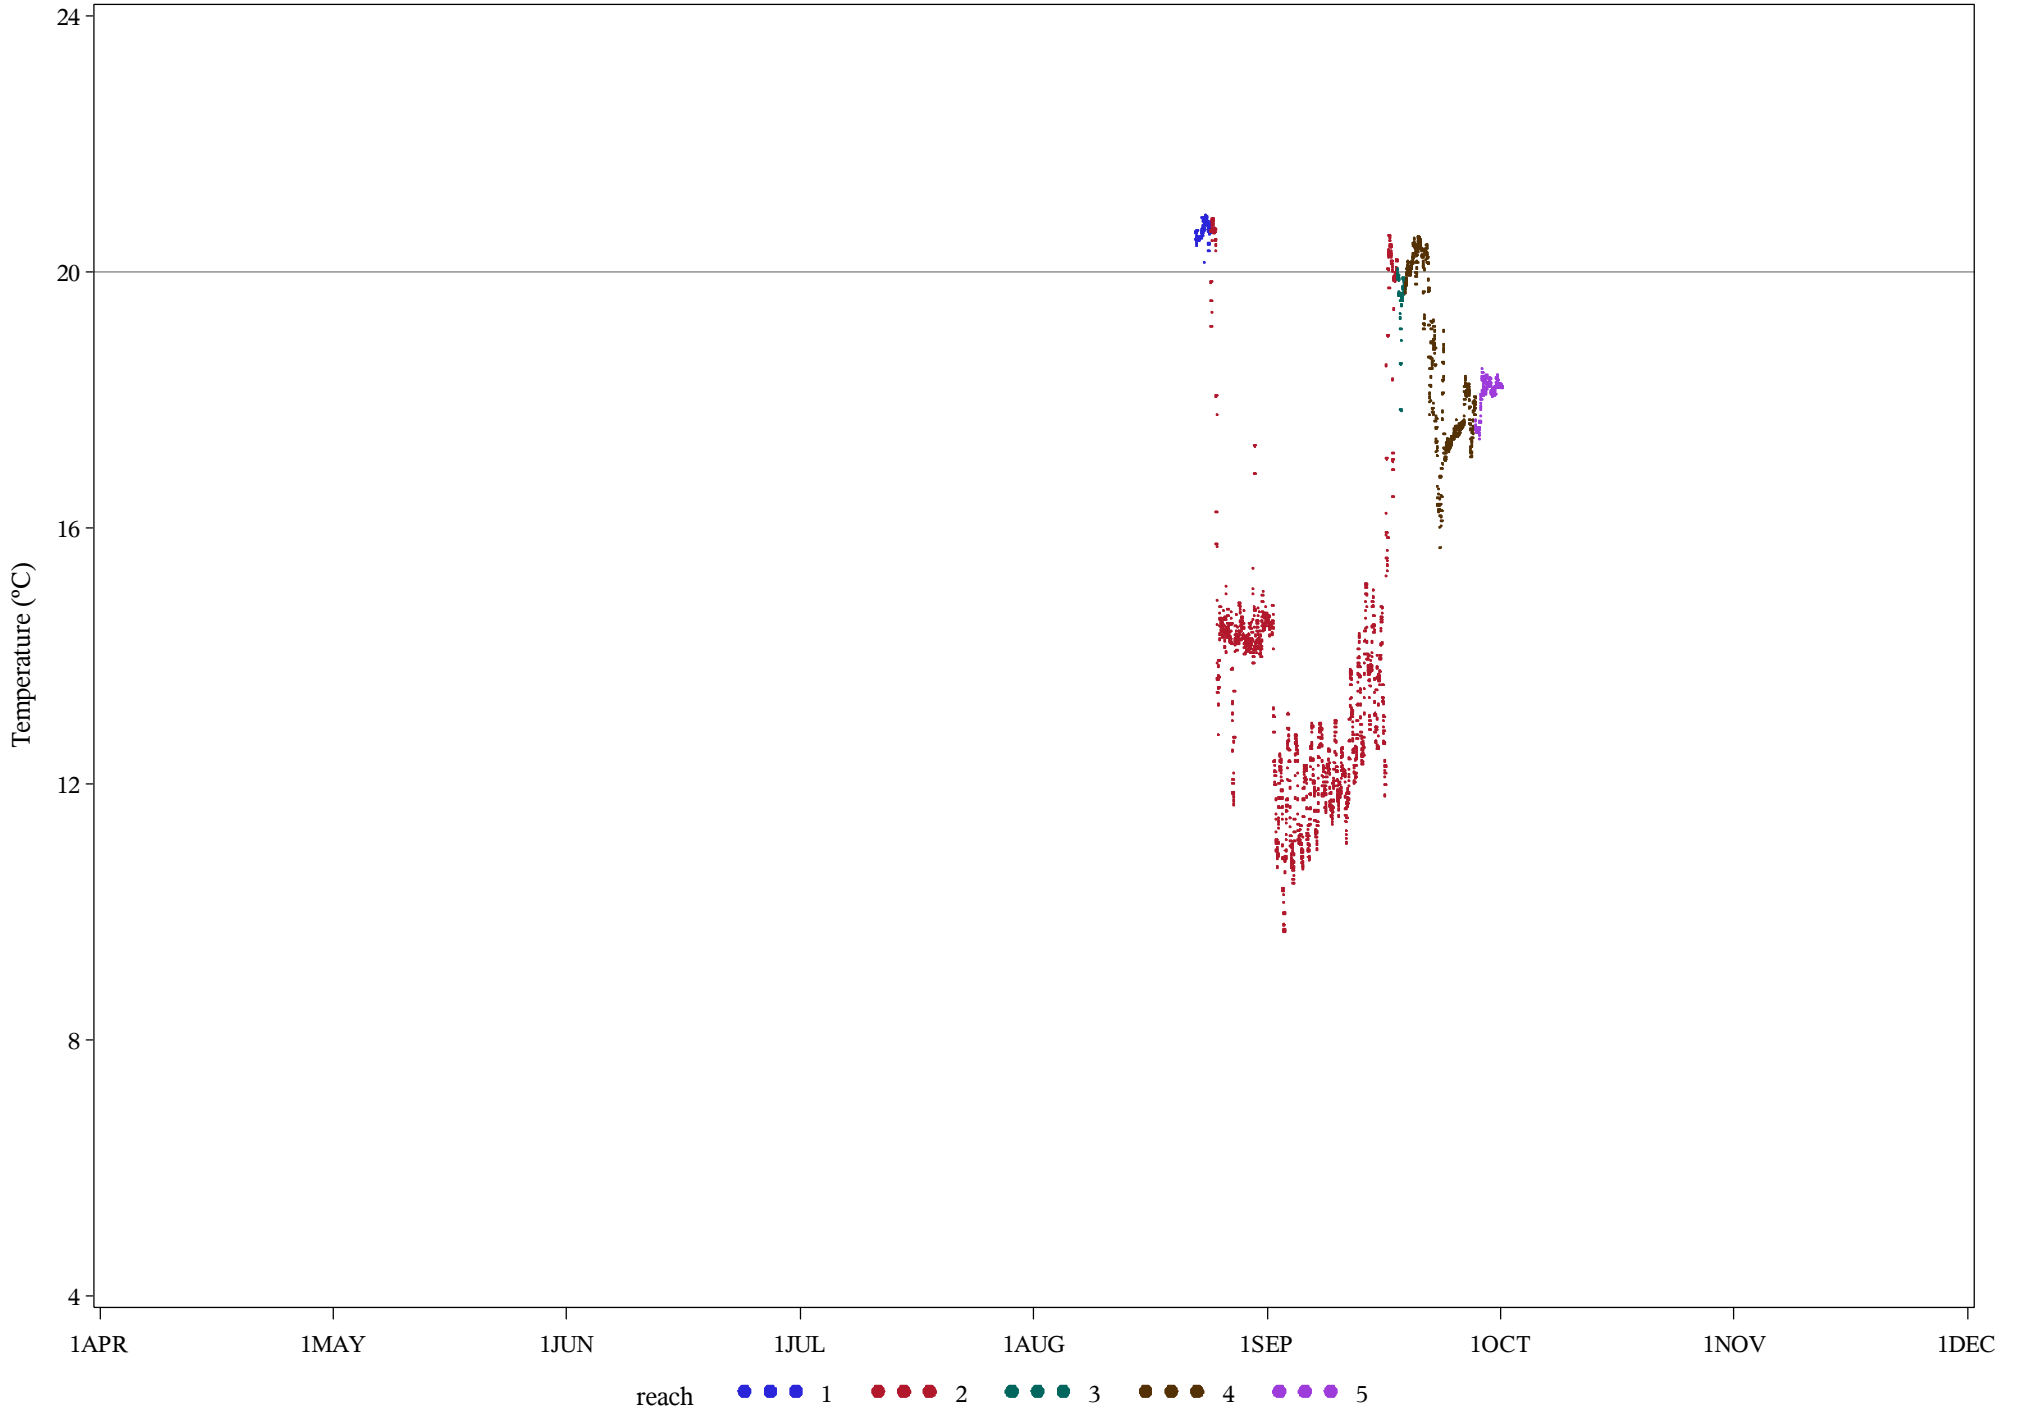

# Steelhead 3040B

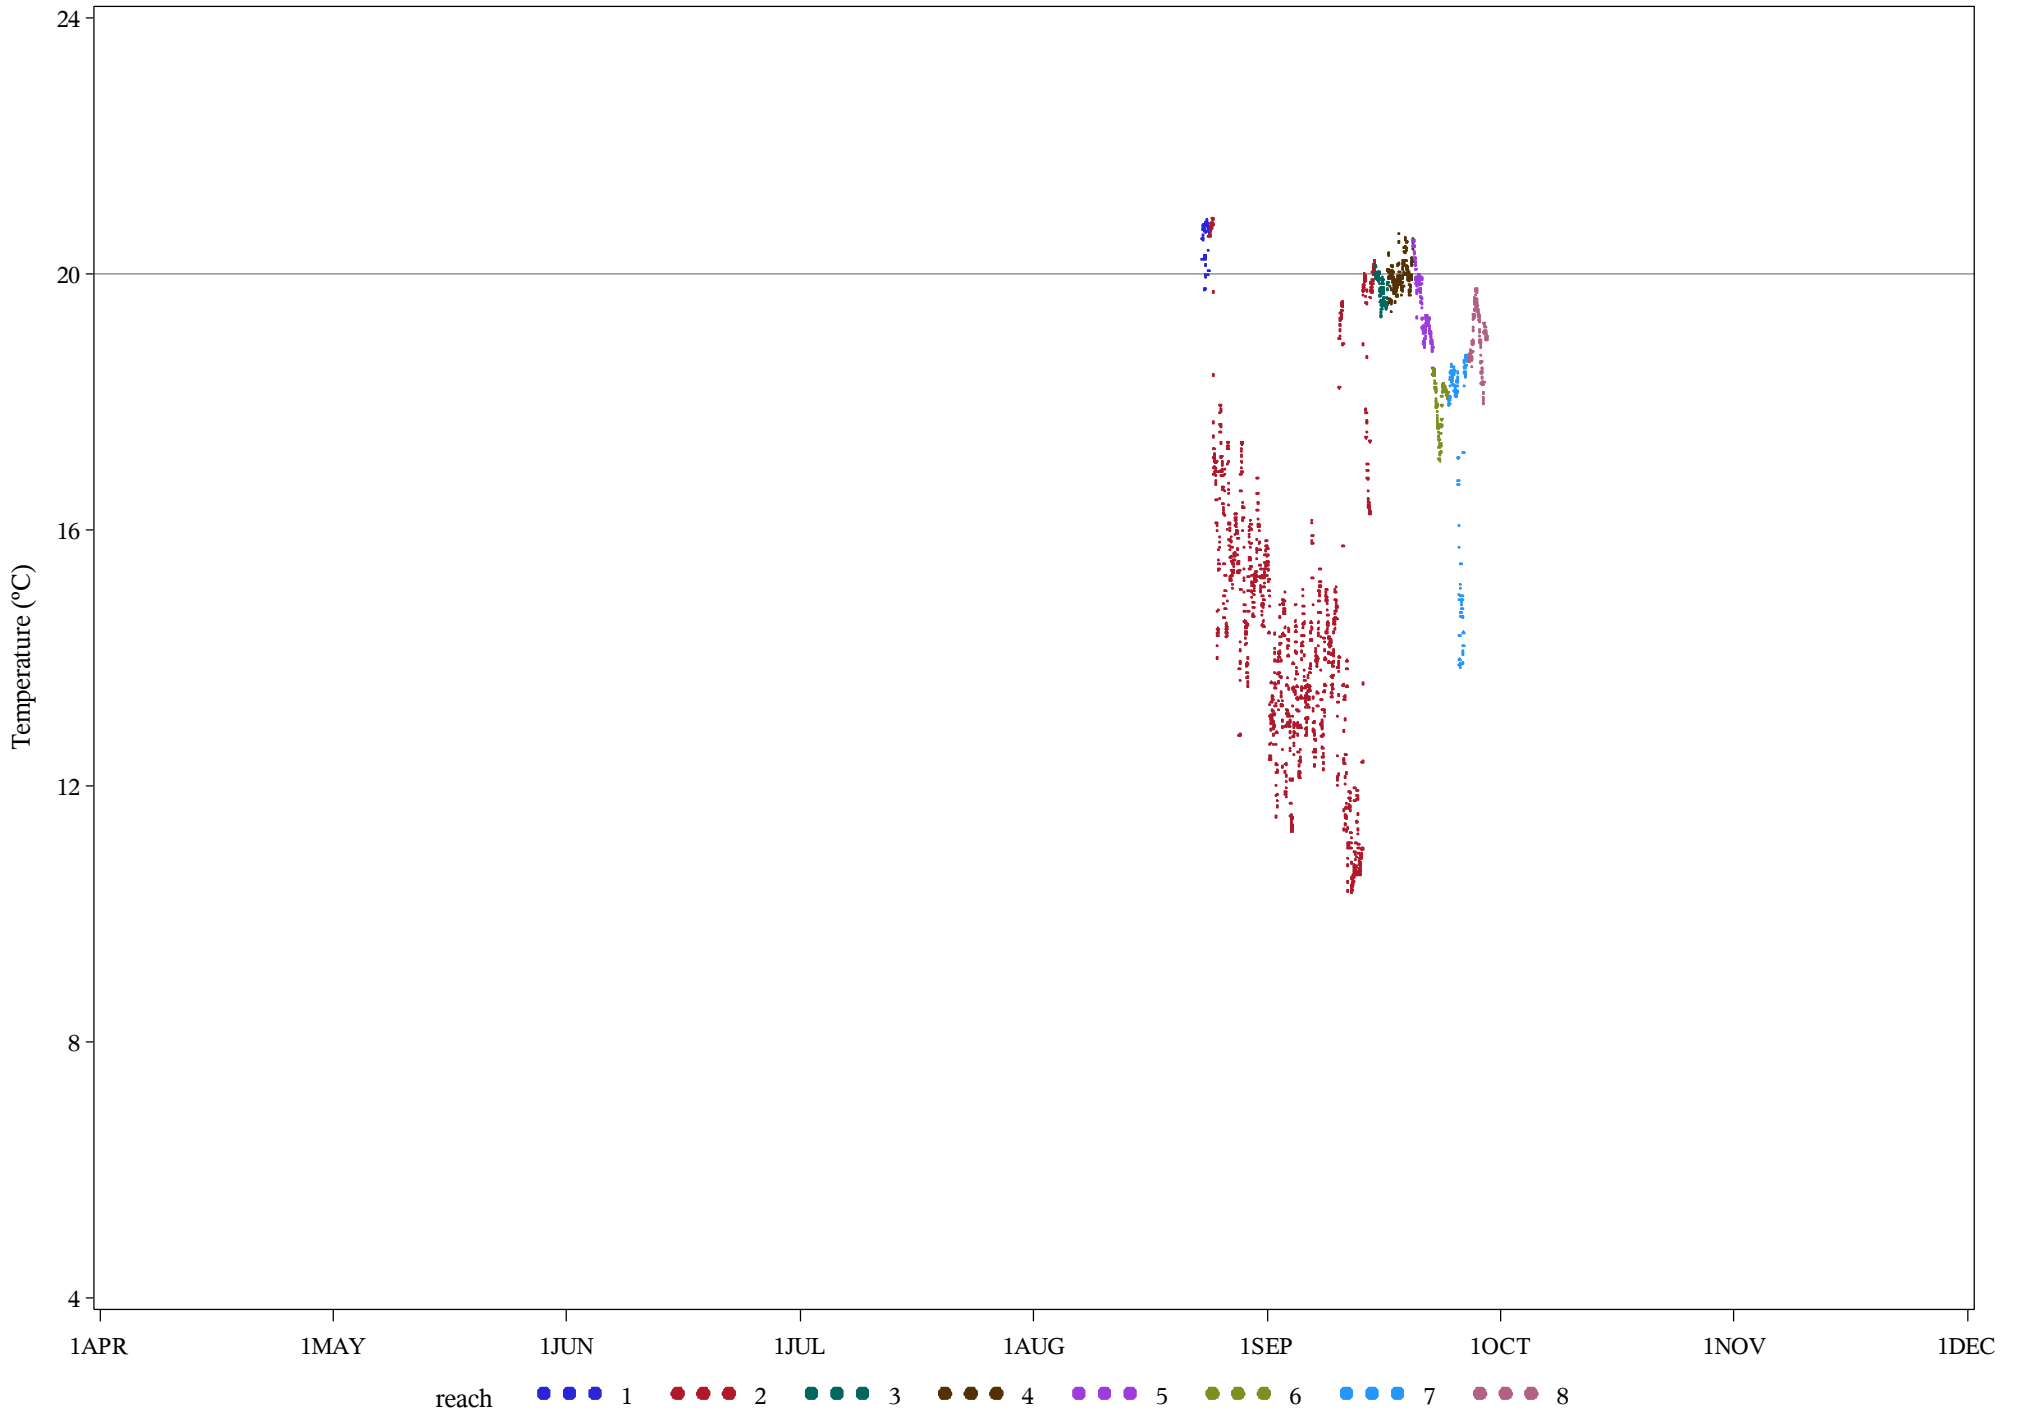

Steelhead  
3047C

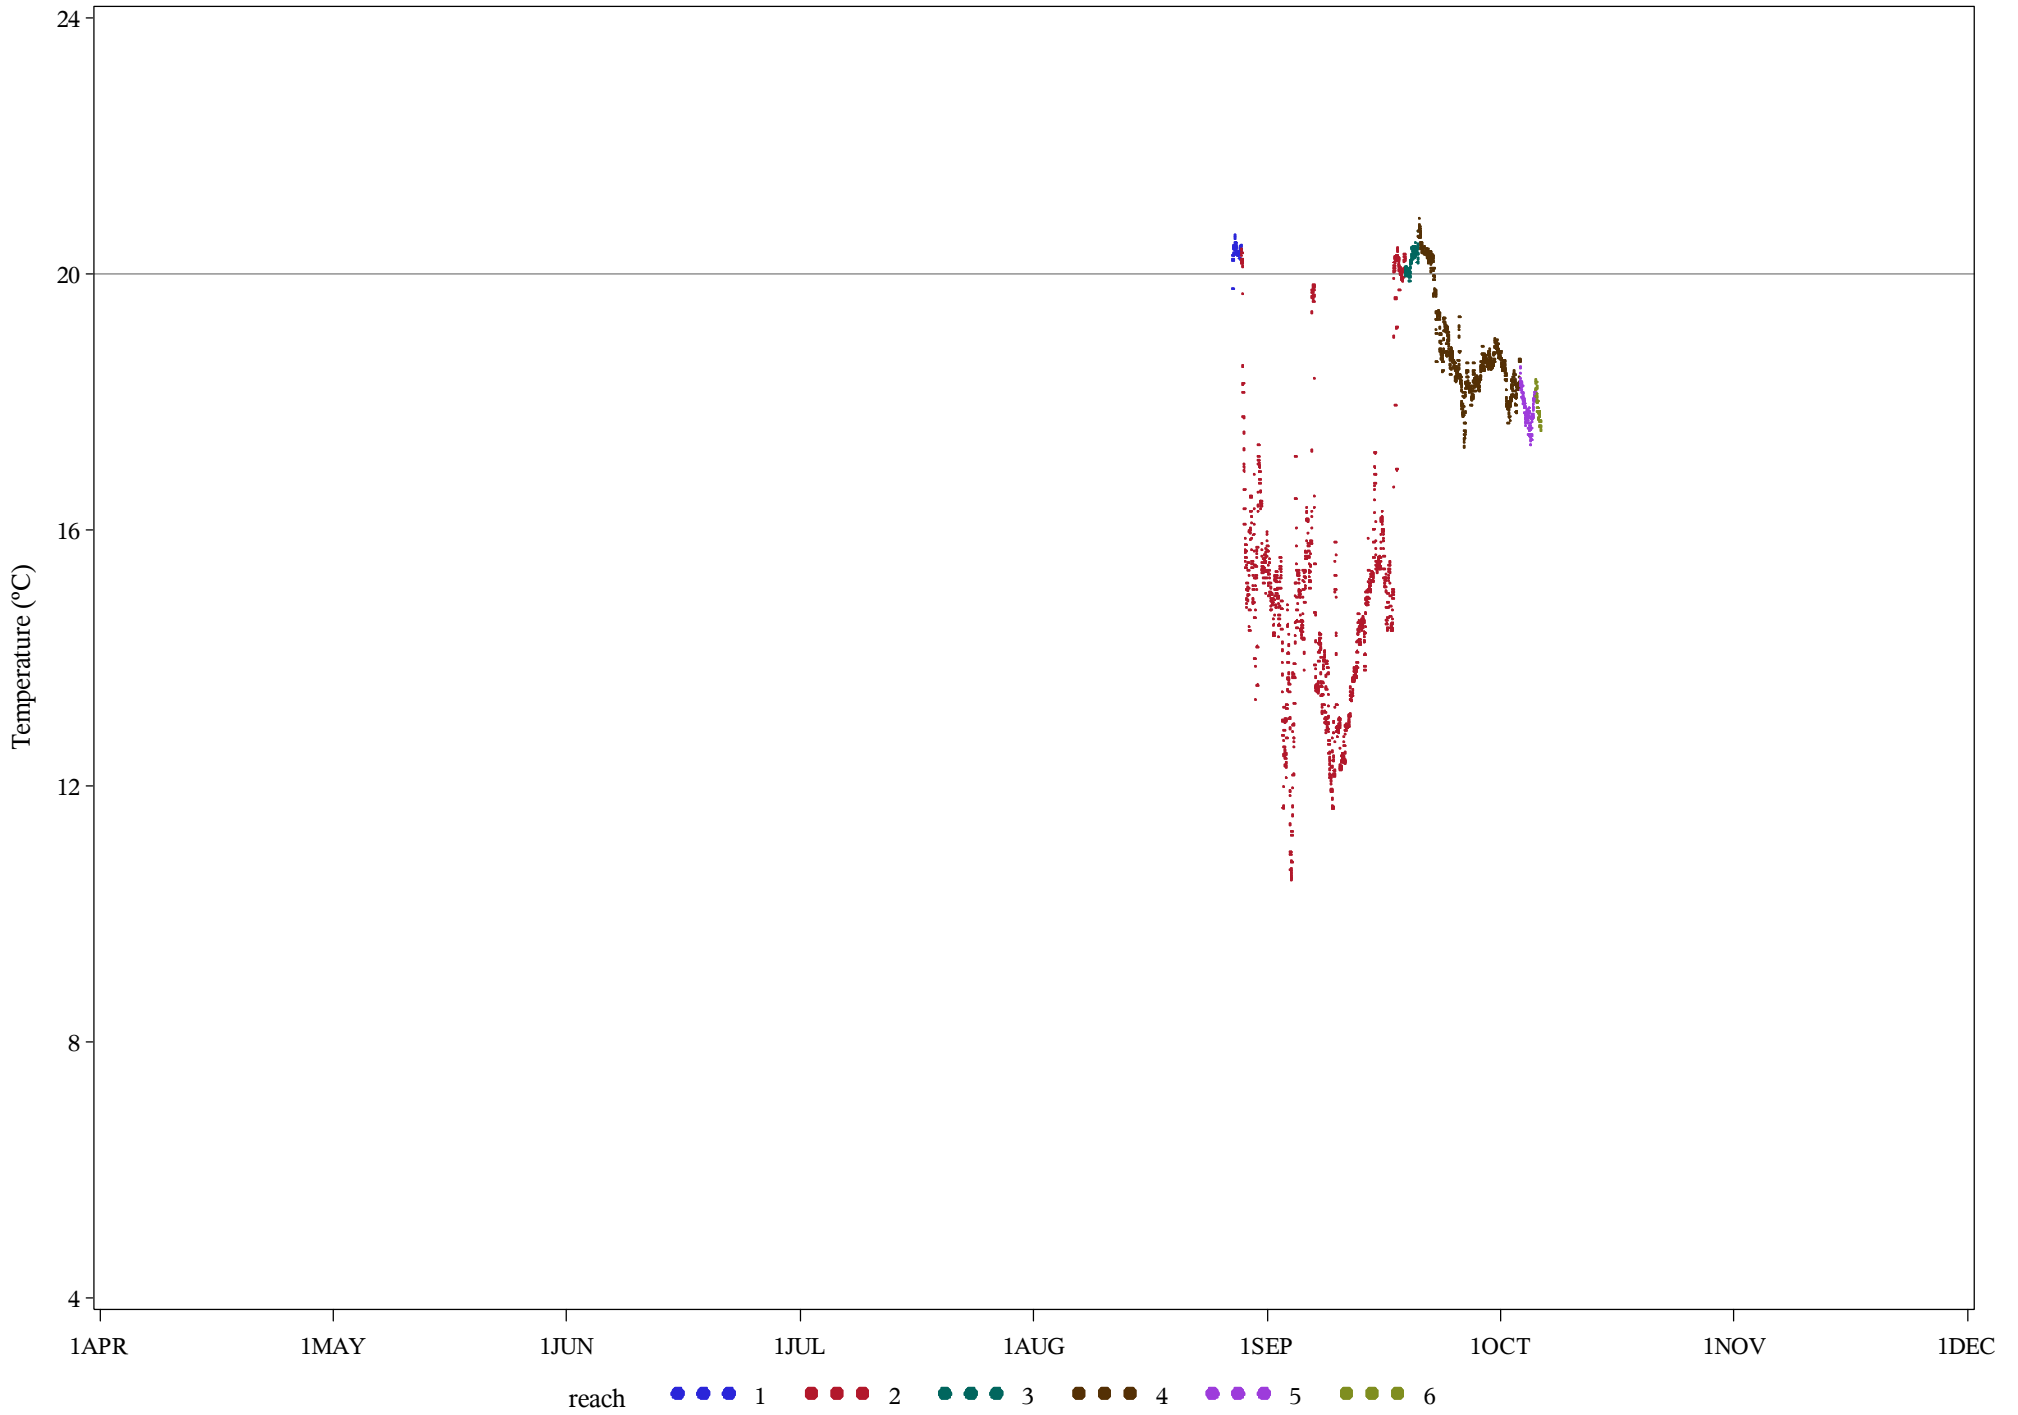

Steelhead  
3072B

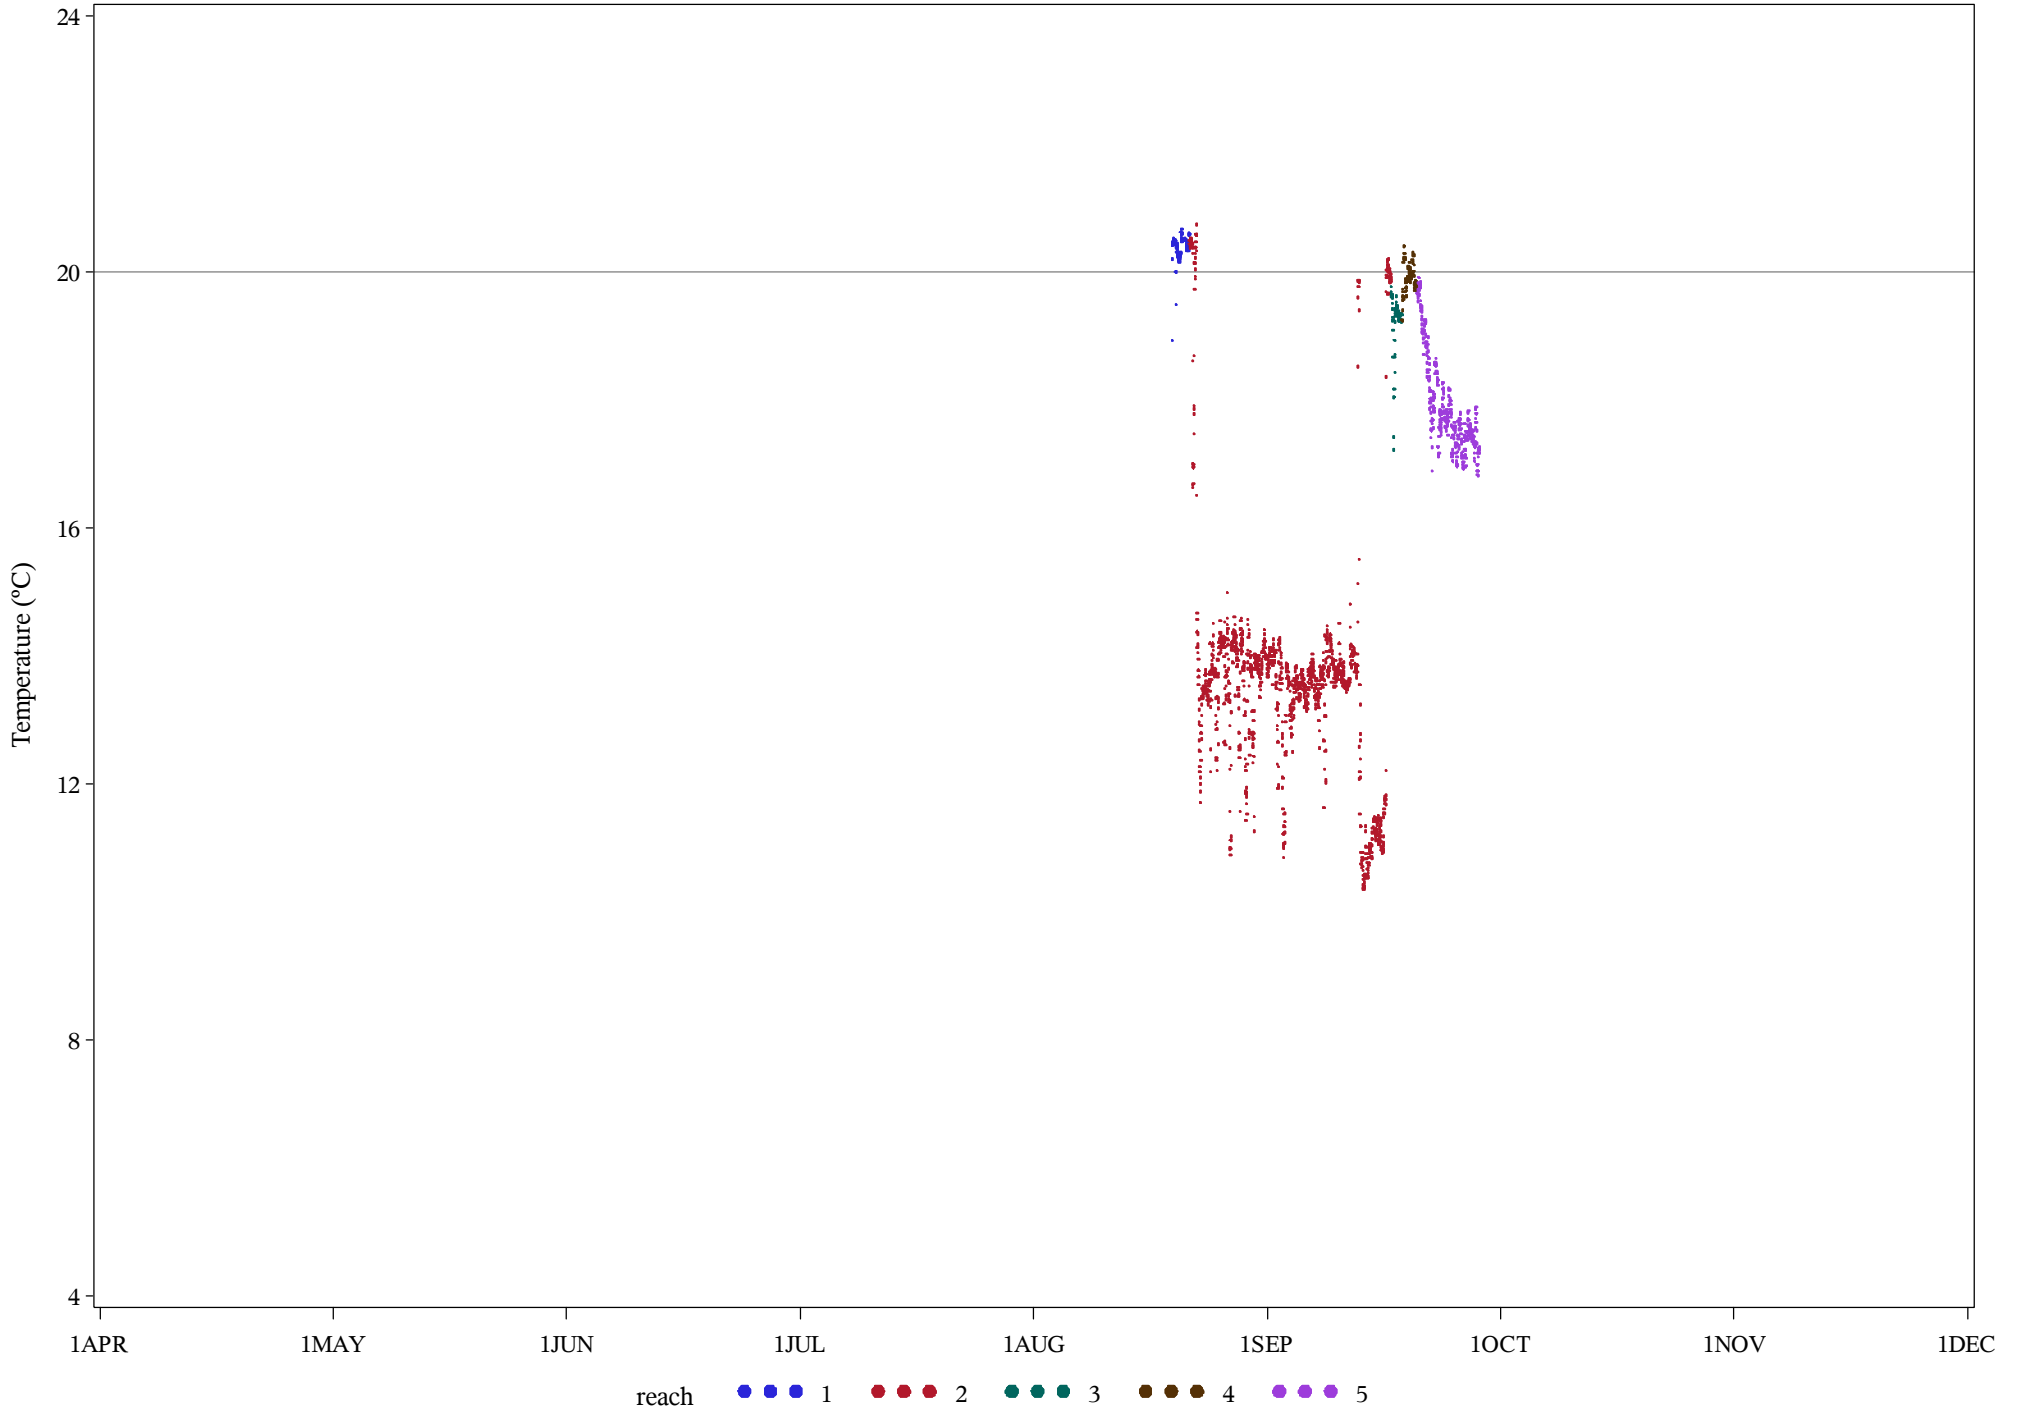



# Steelhead 3081C

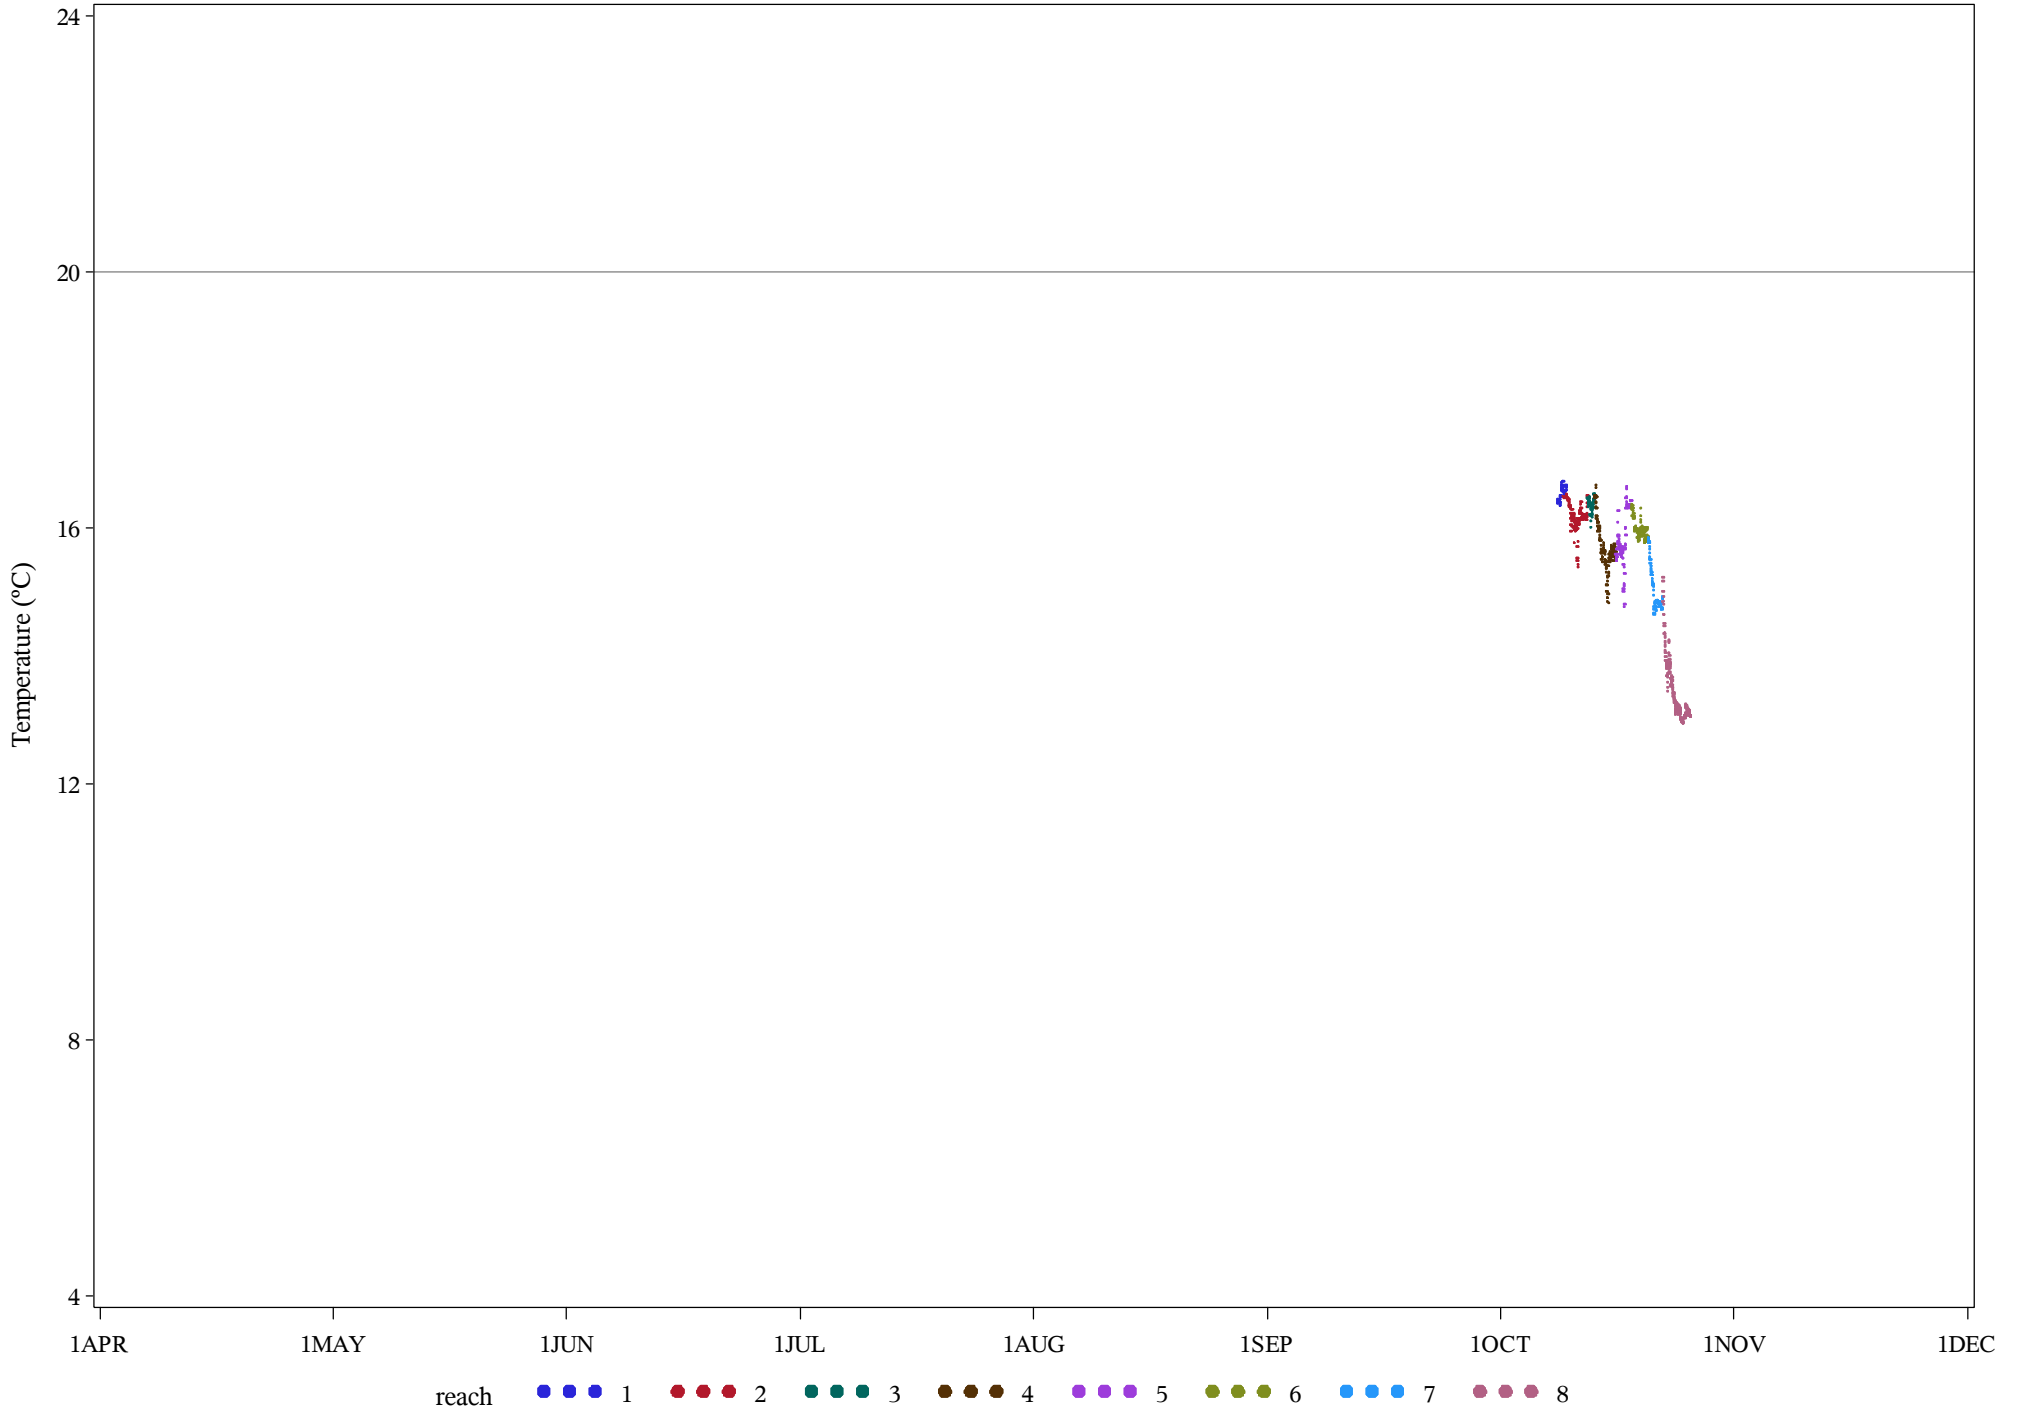

# Steelhead 3088B

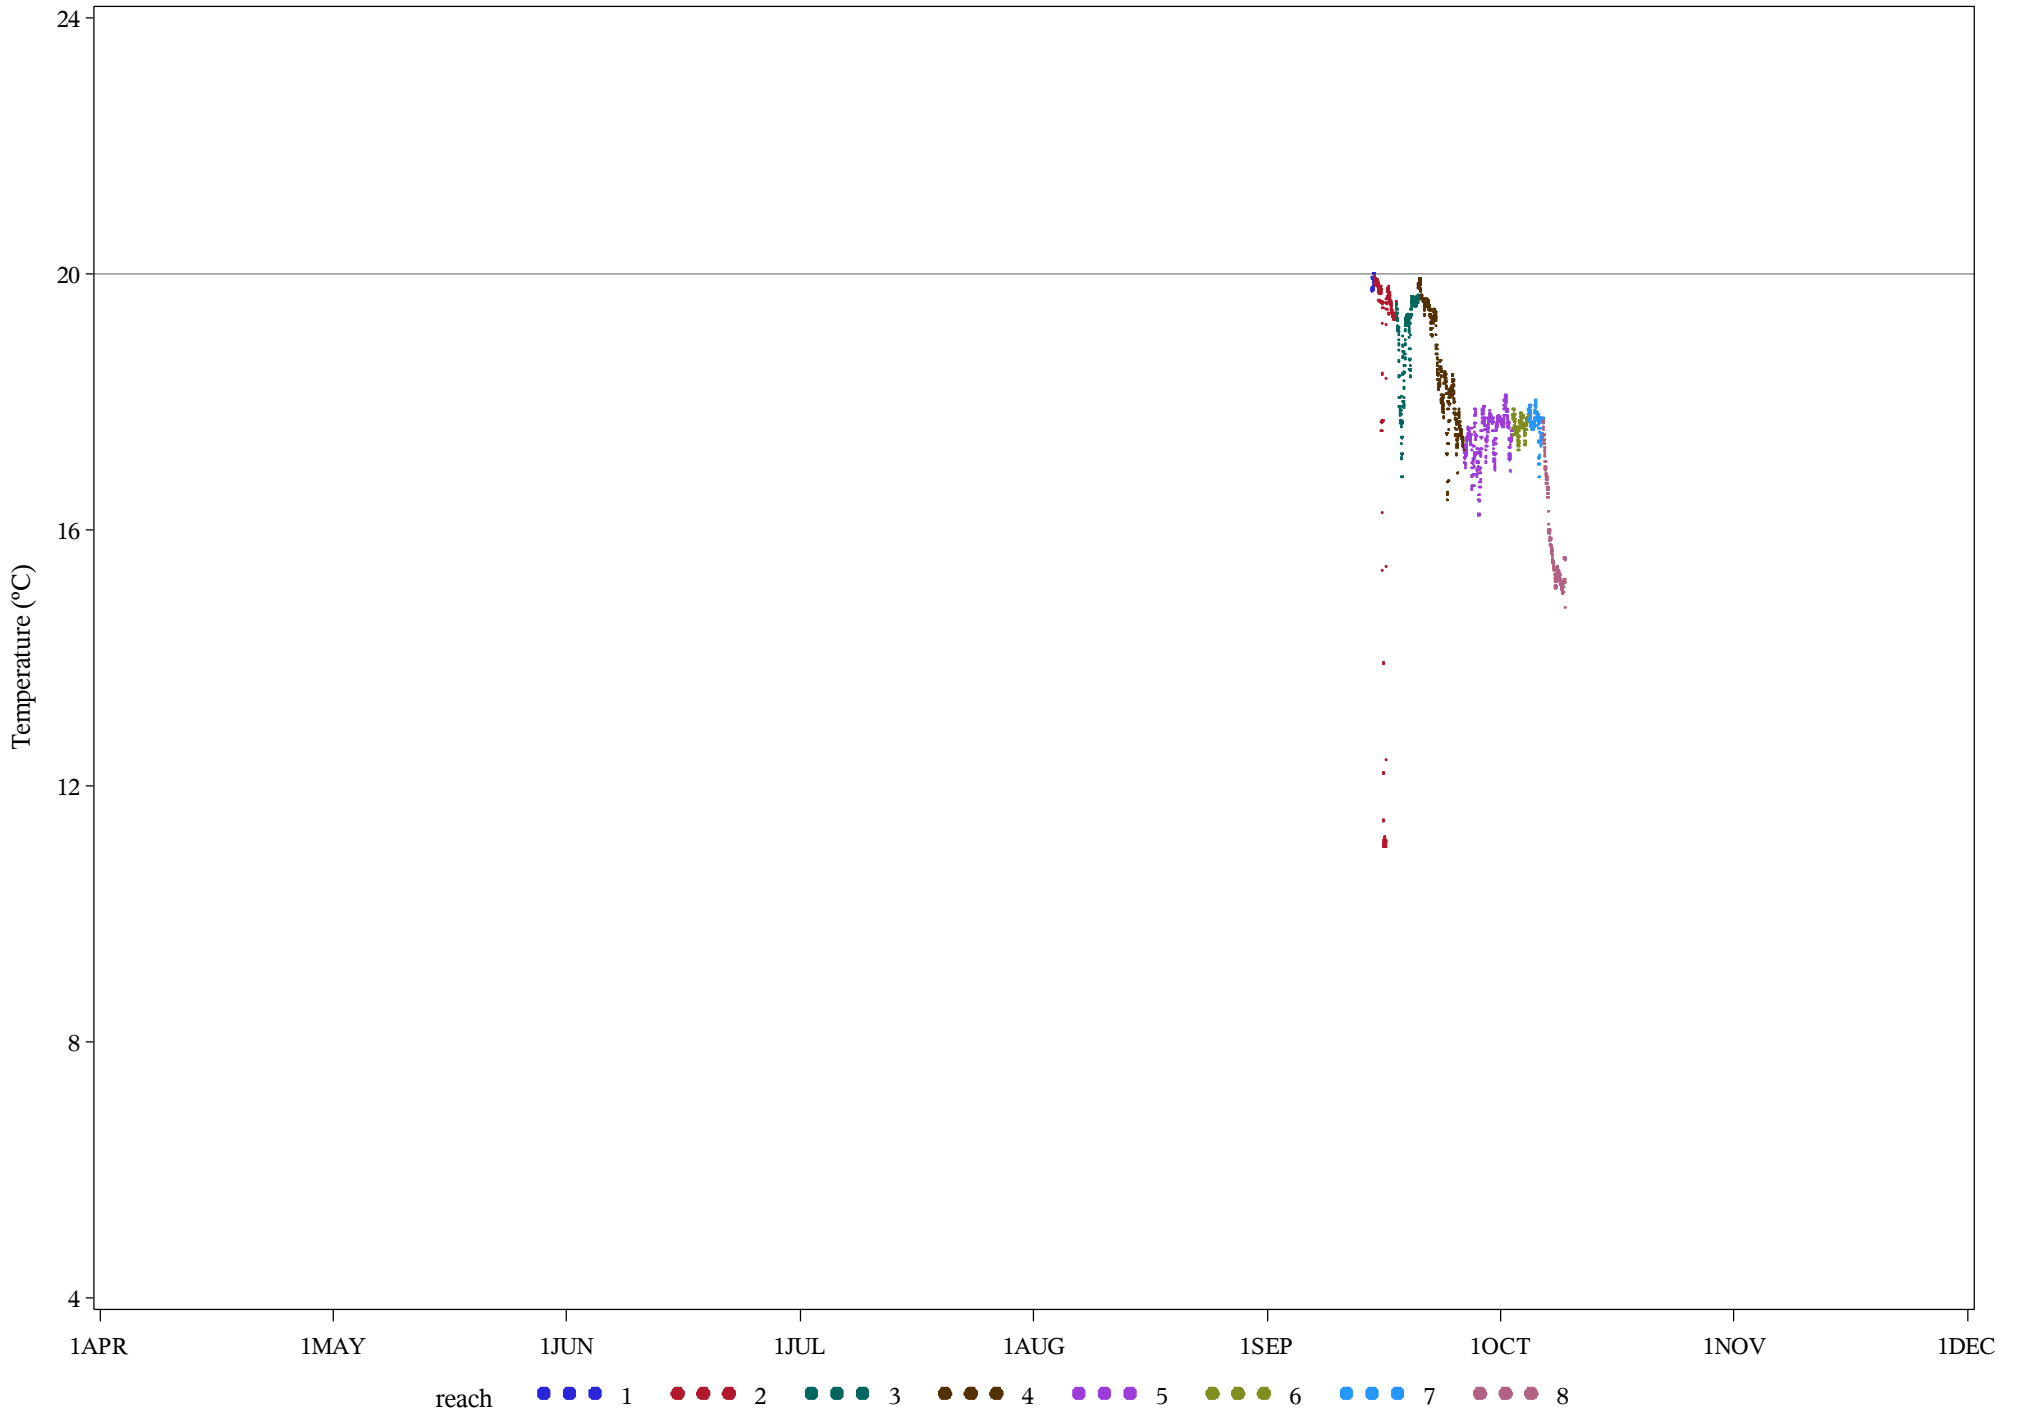

# Steelhead 3570A

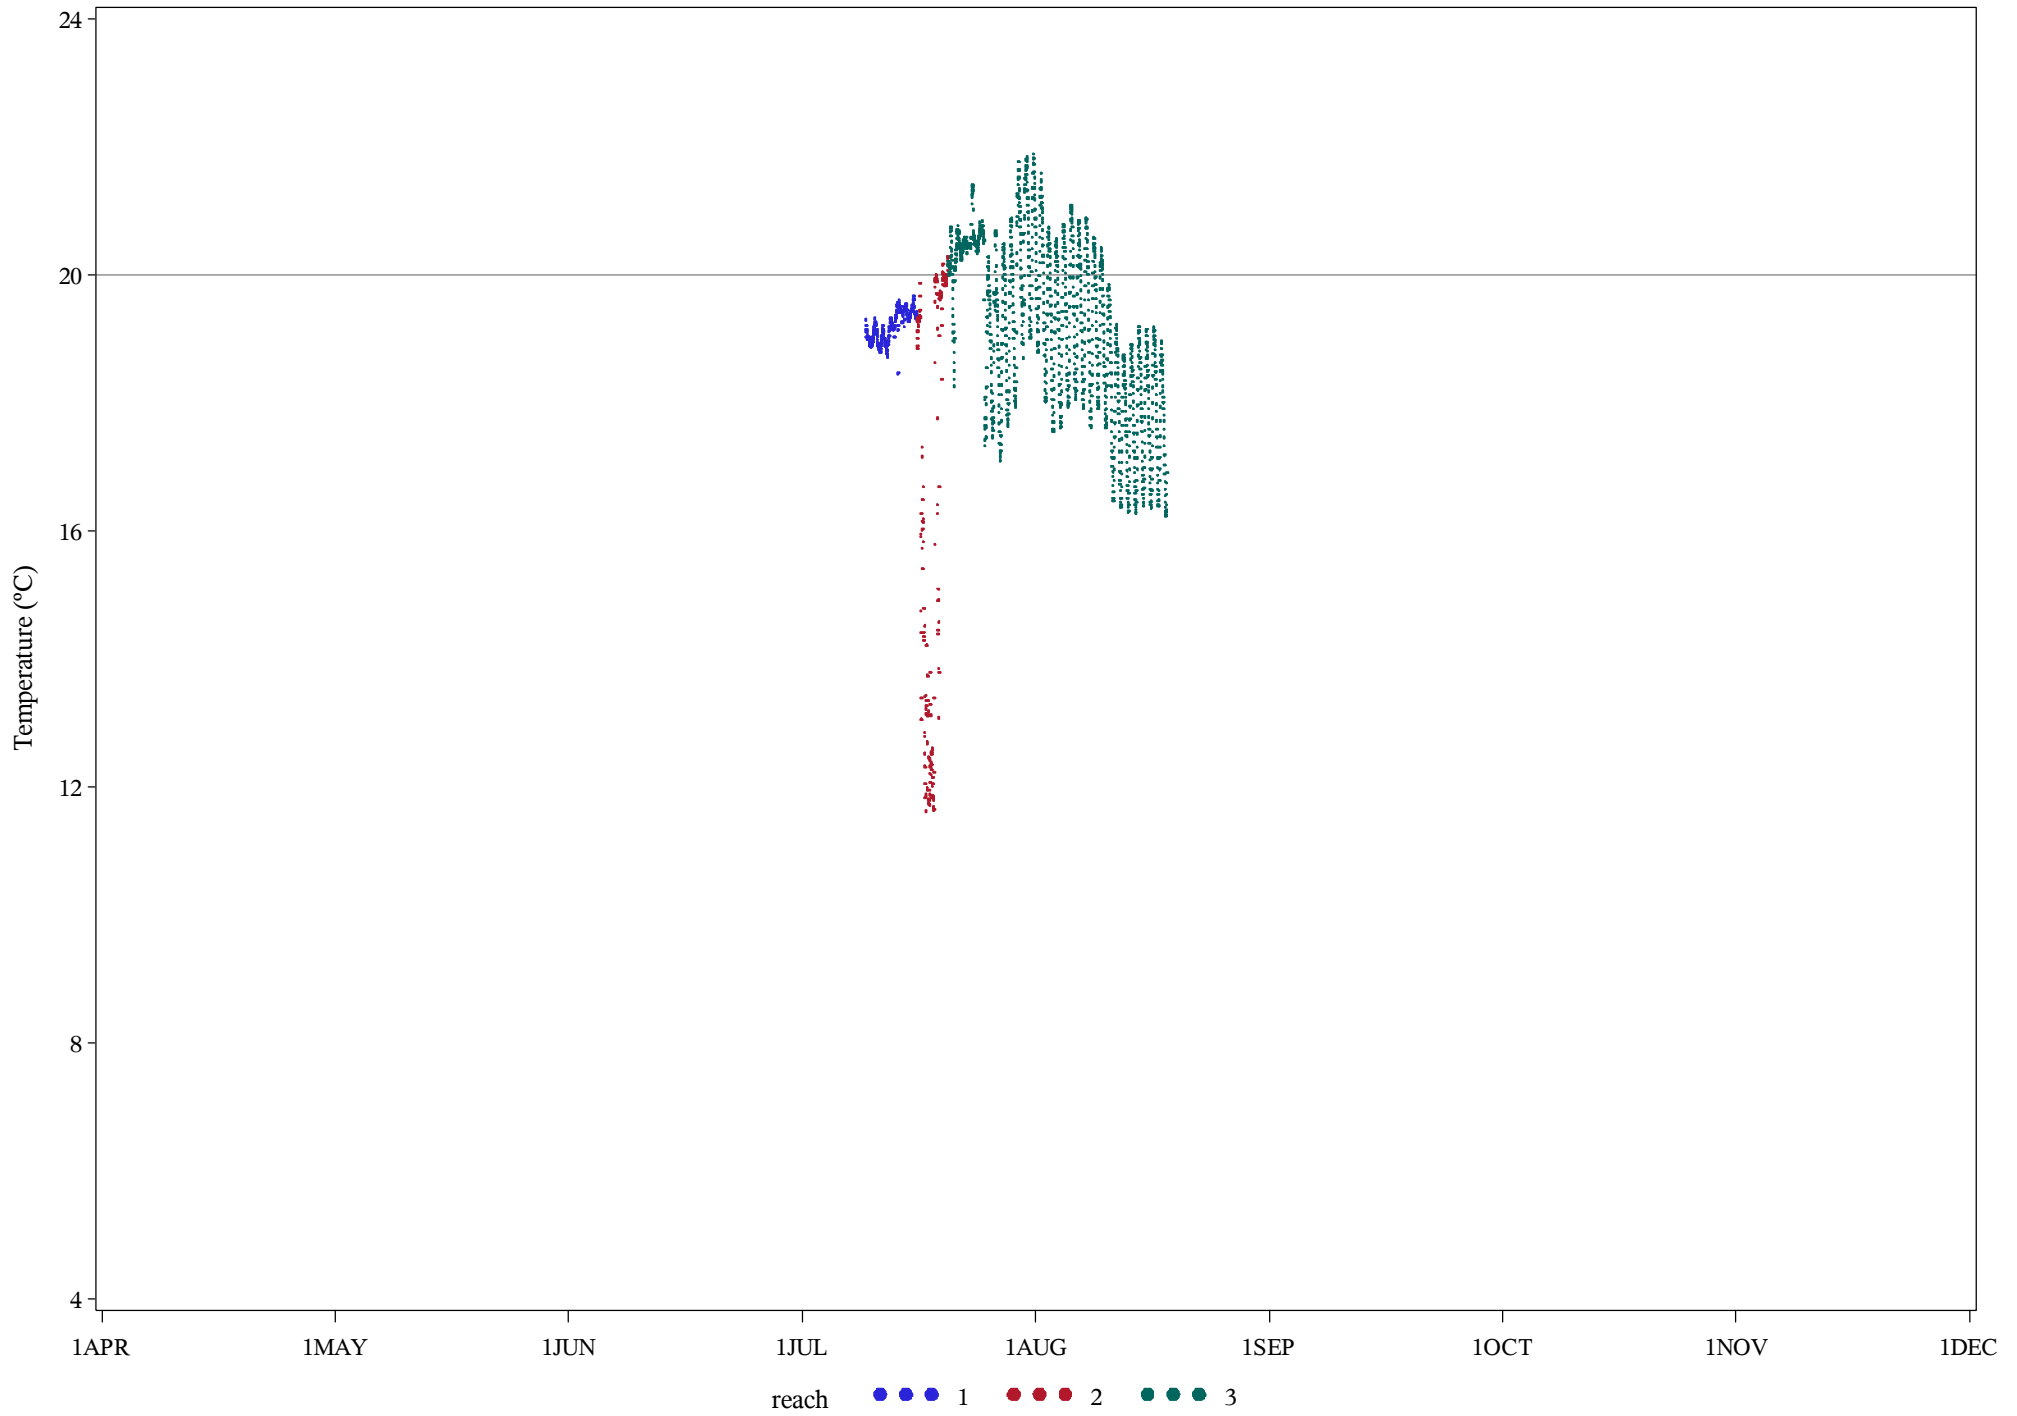



Steelhead  
3718A

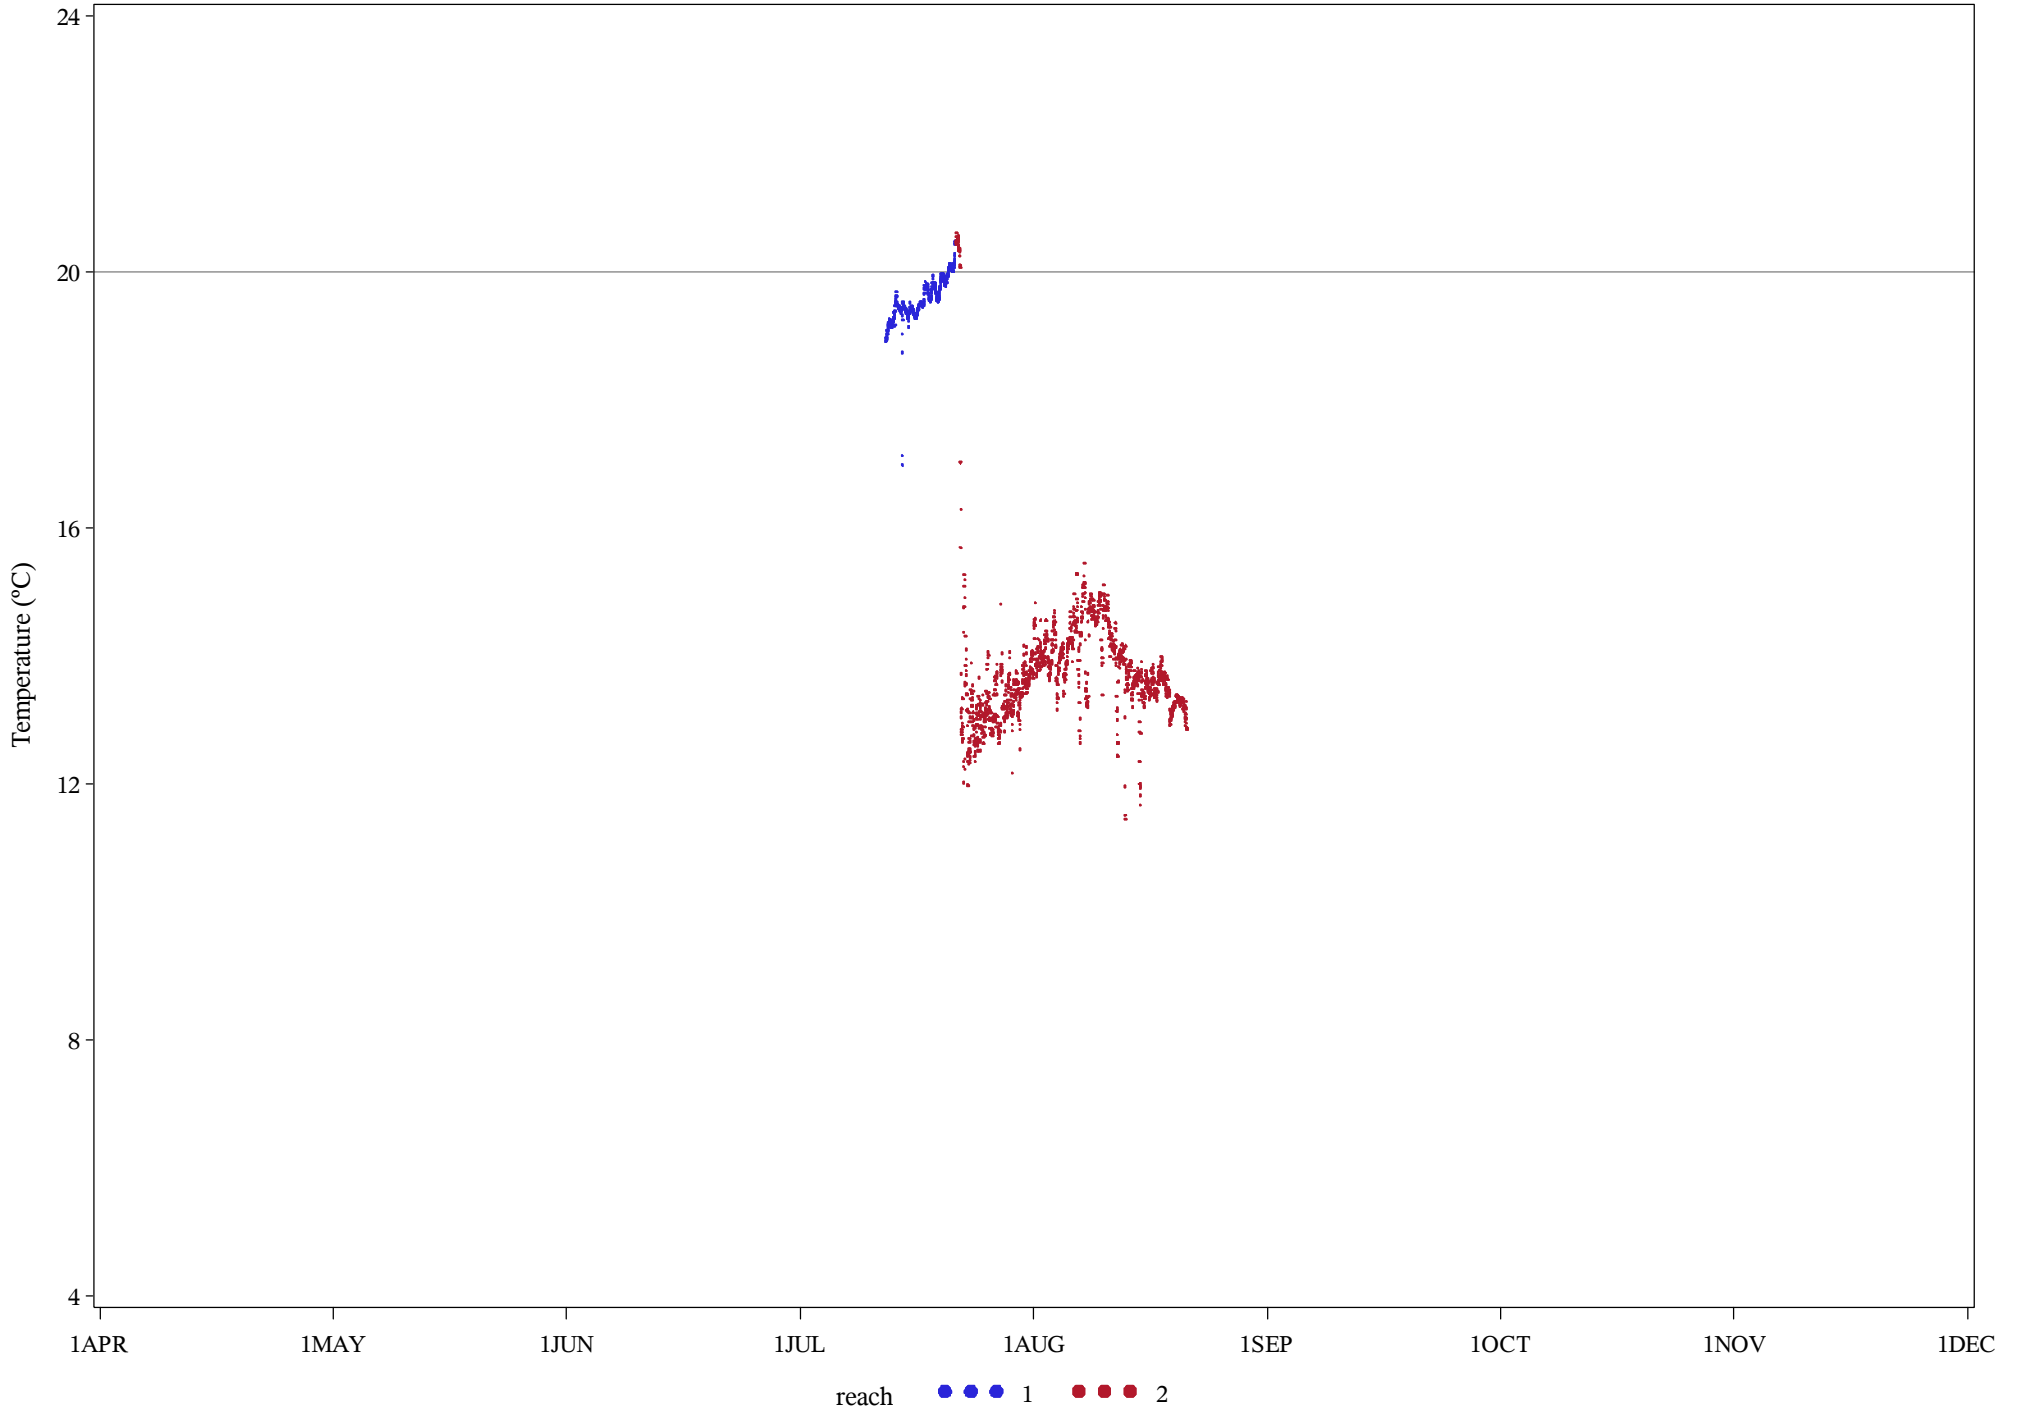

# Steelhead 3733B

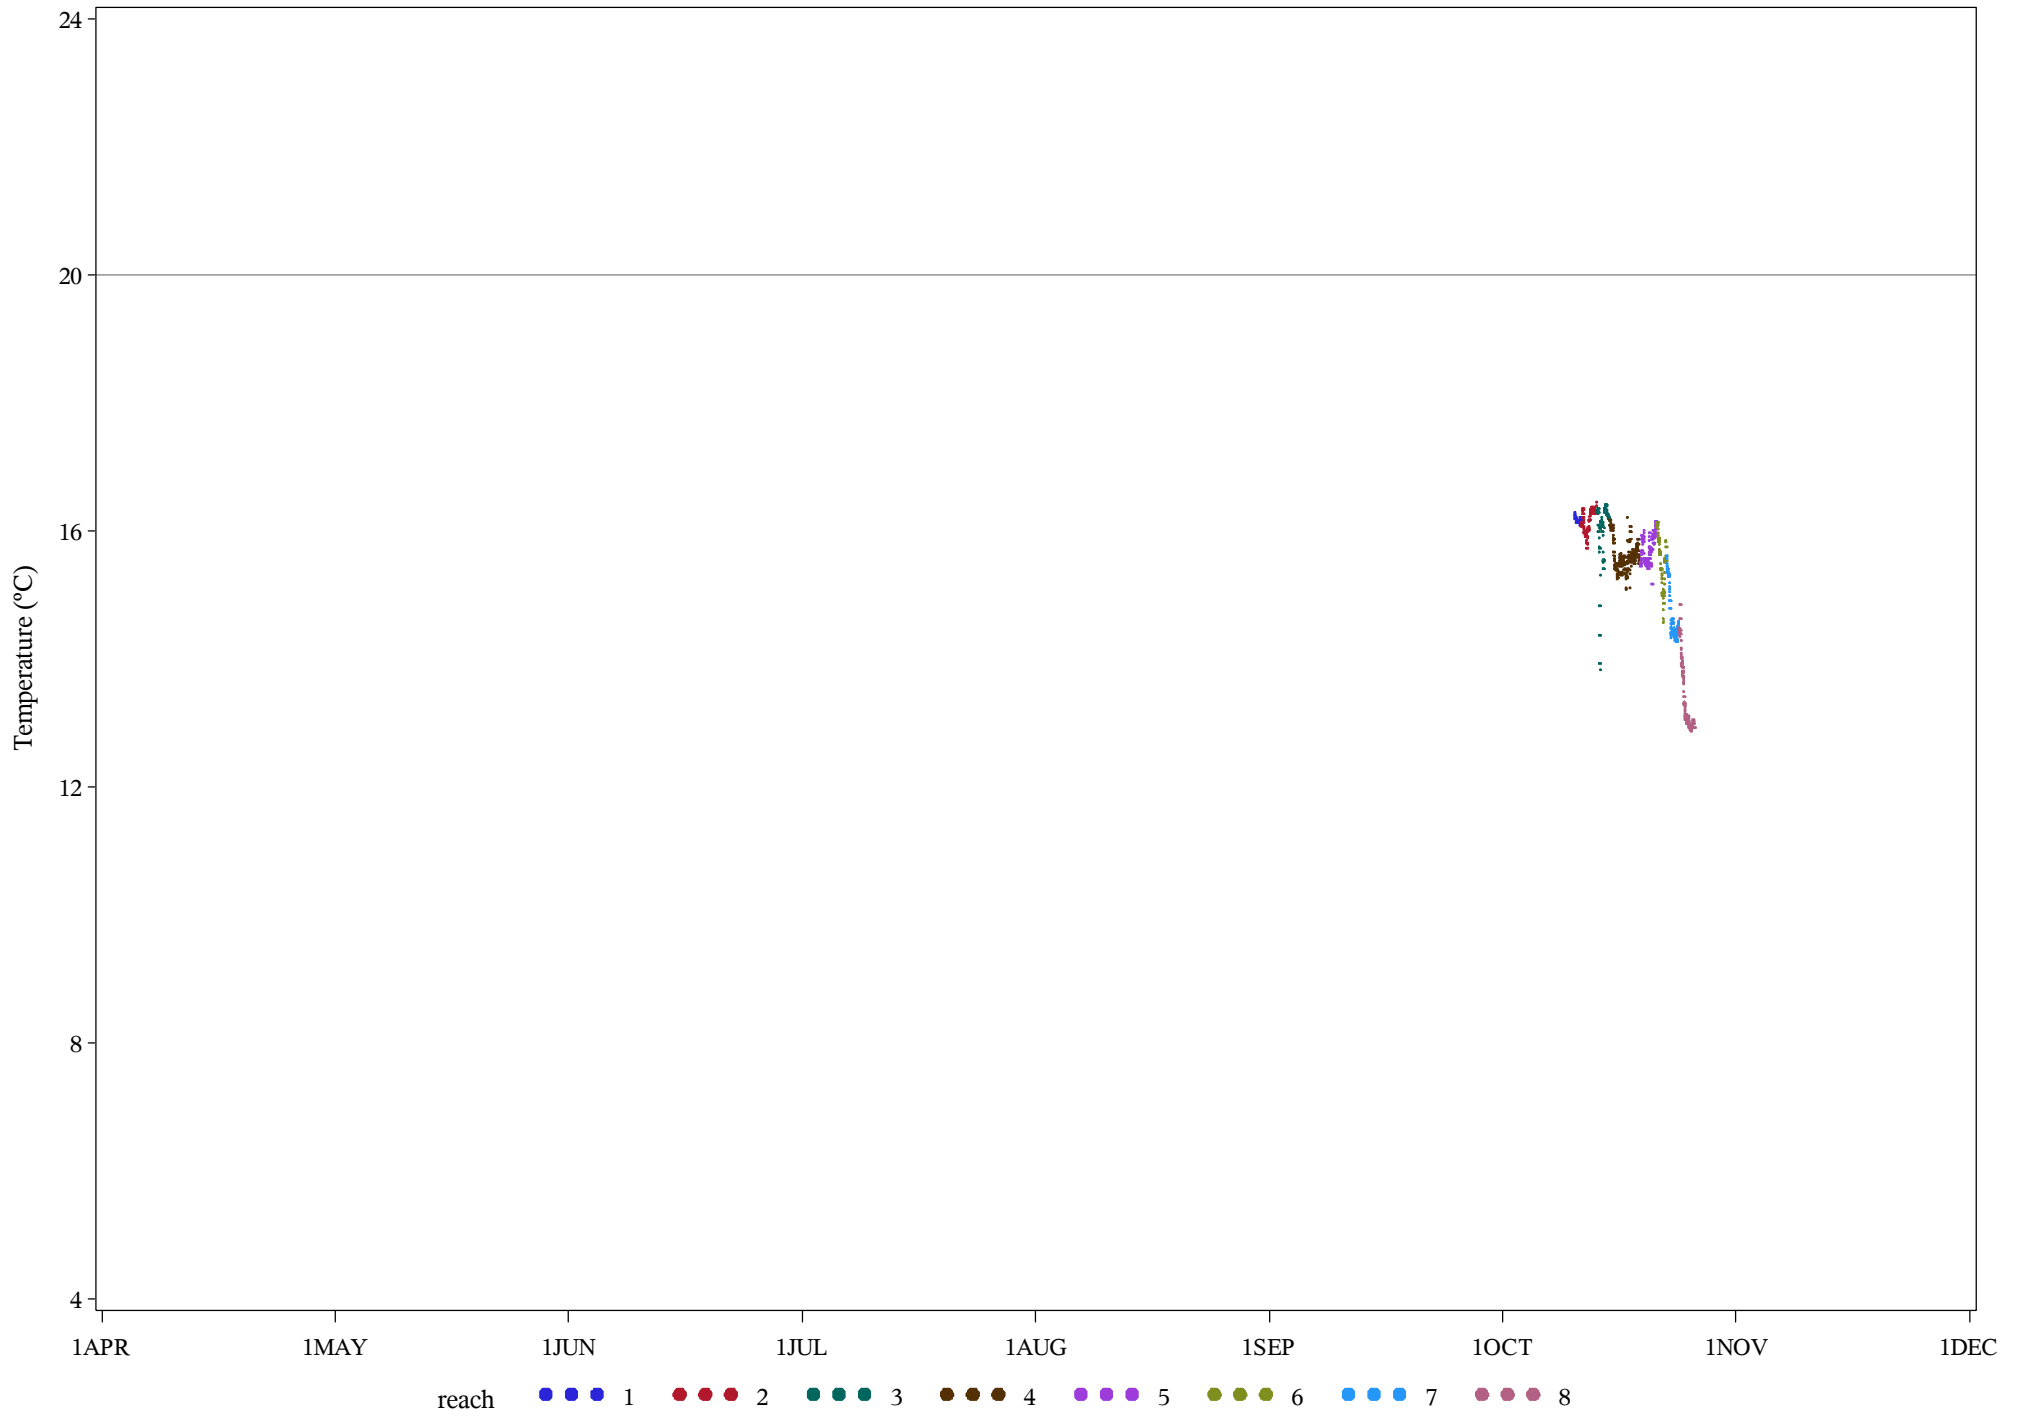

# Steelhead 3763B

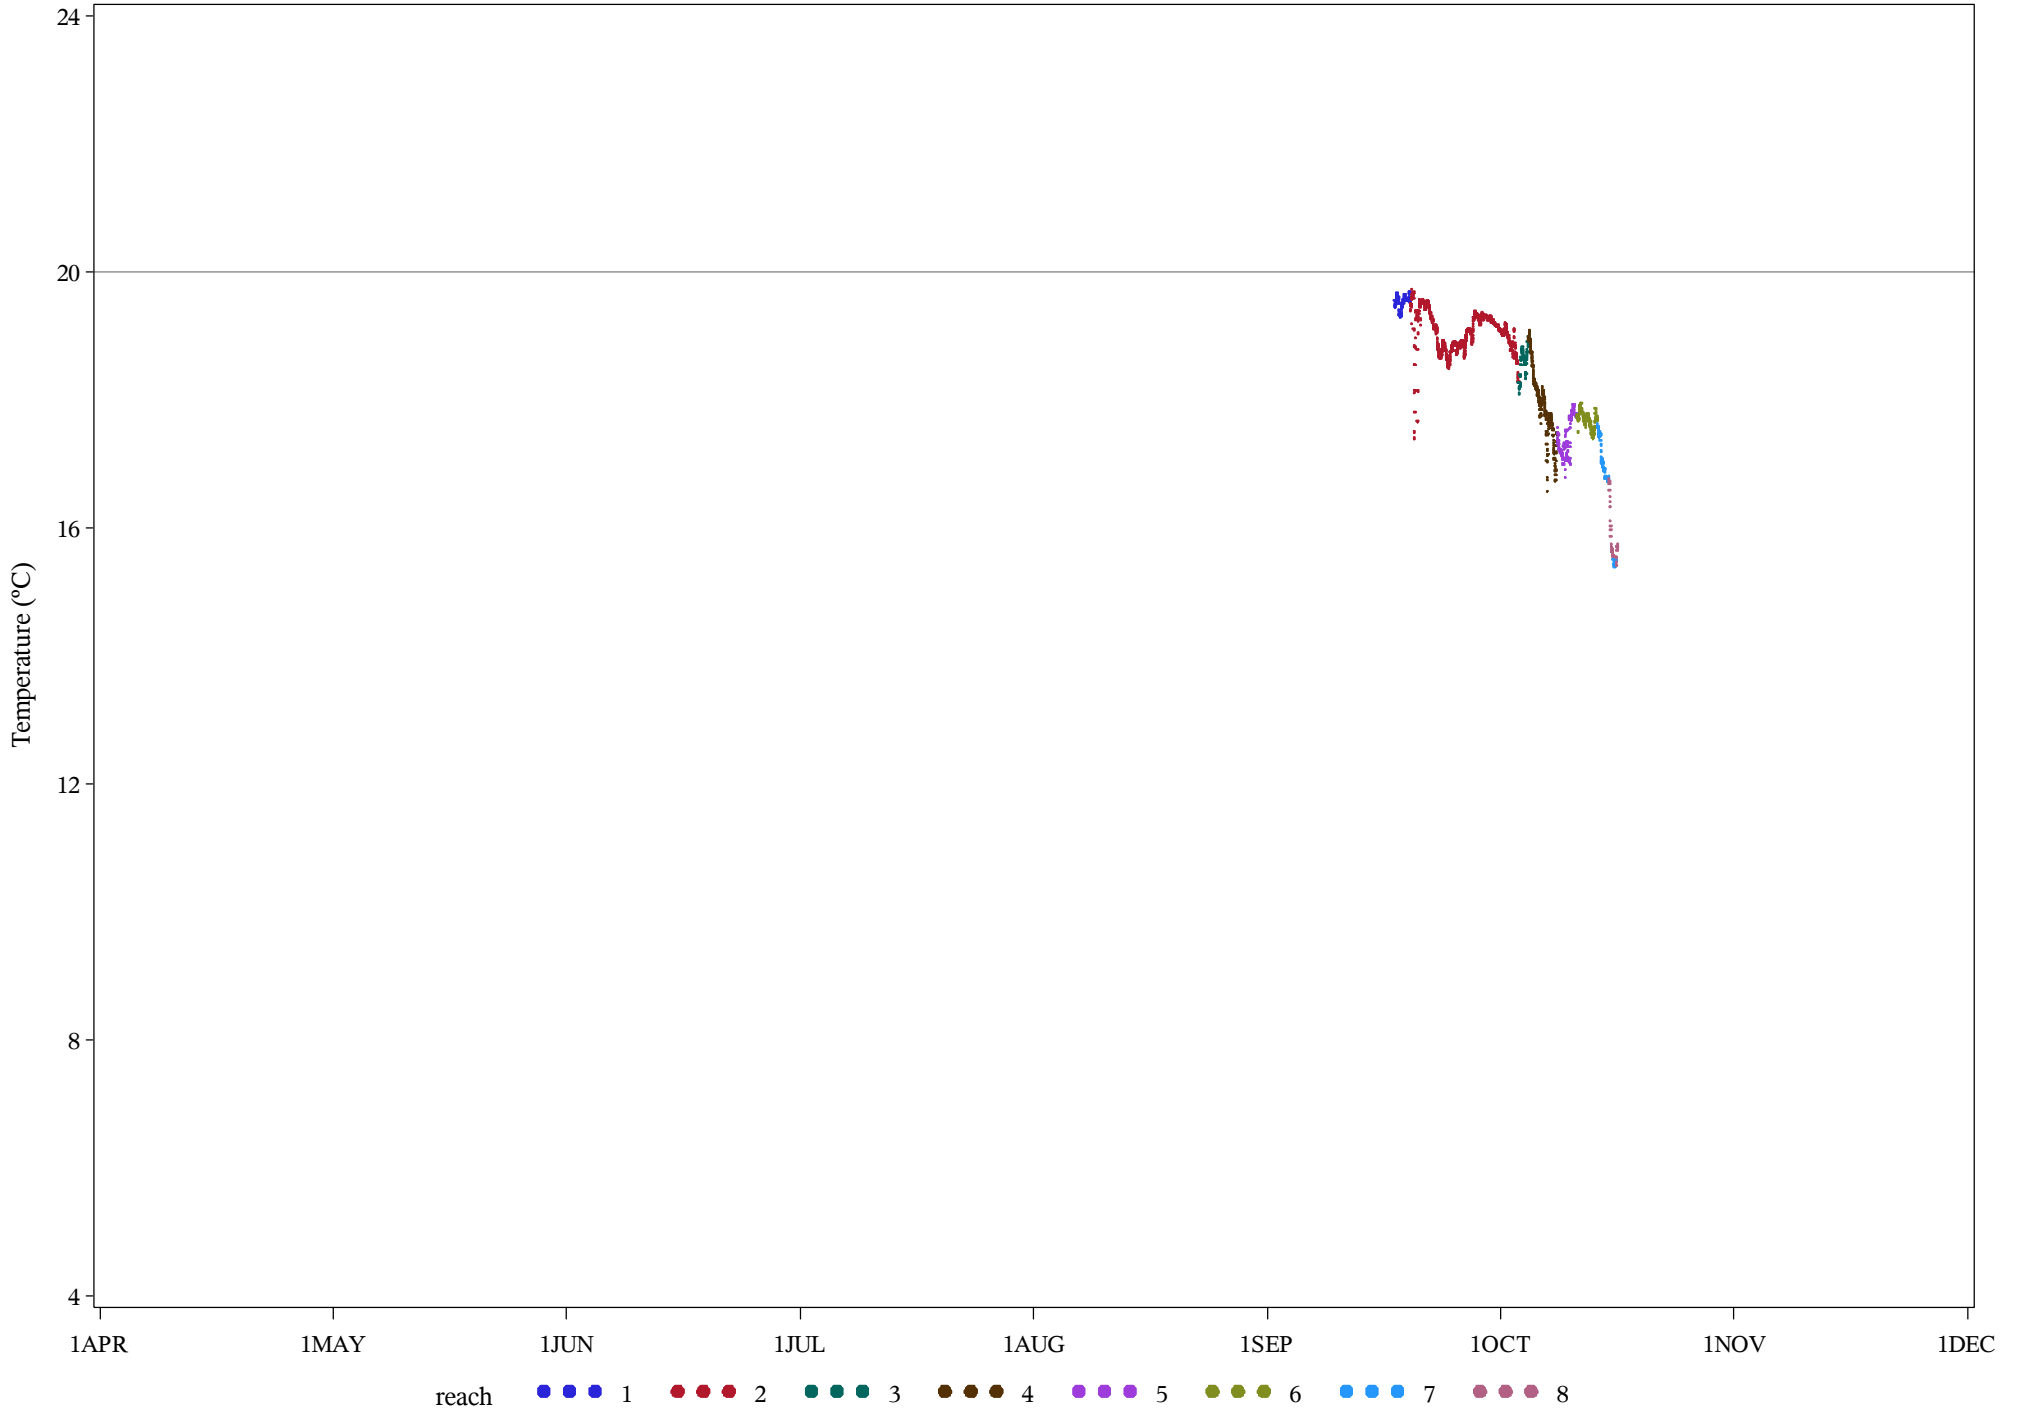

Steelhead  
3773B

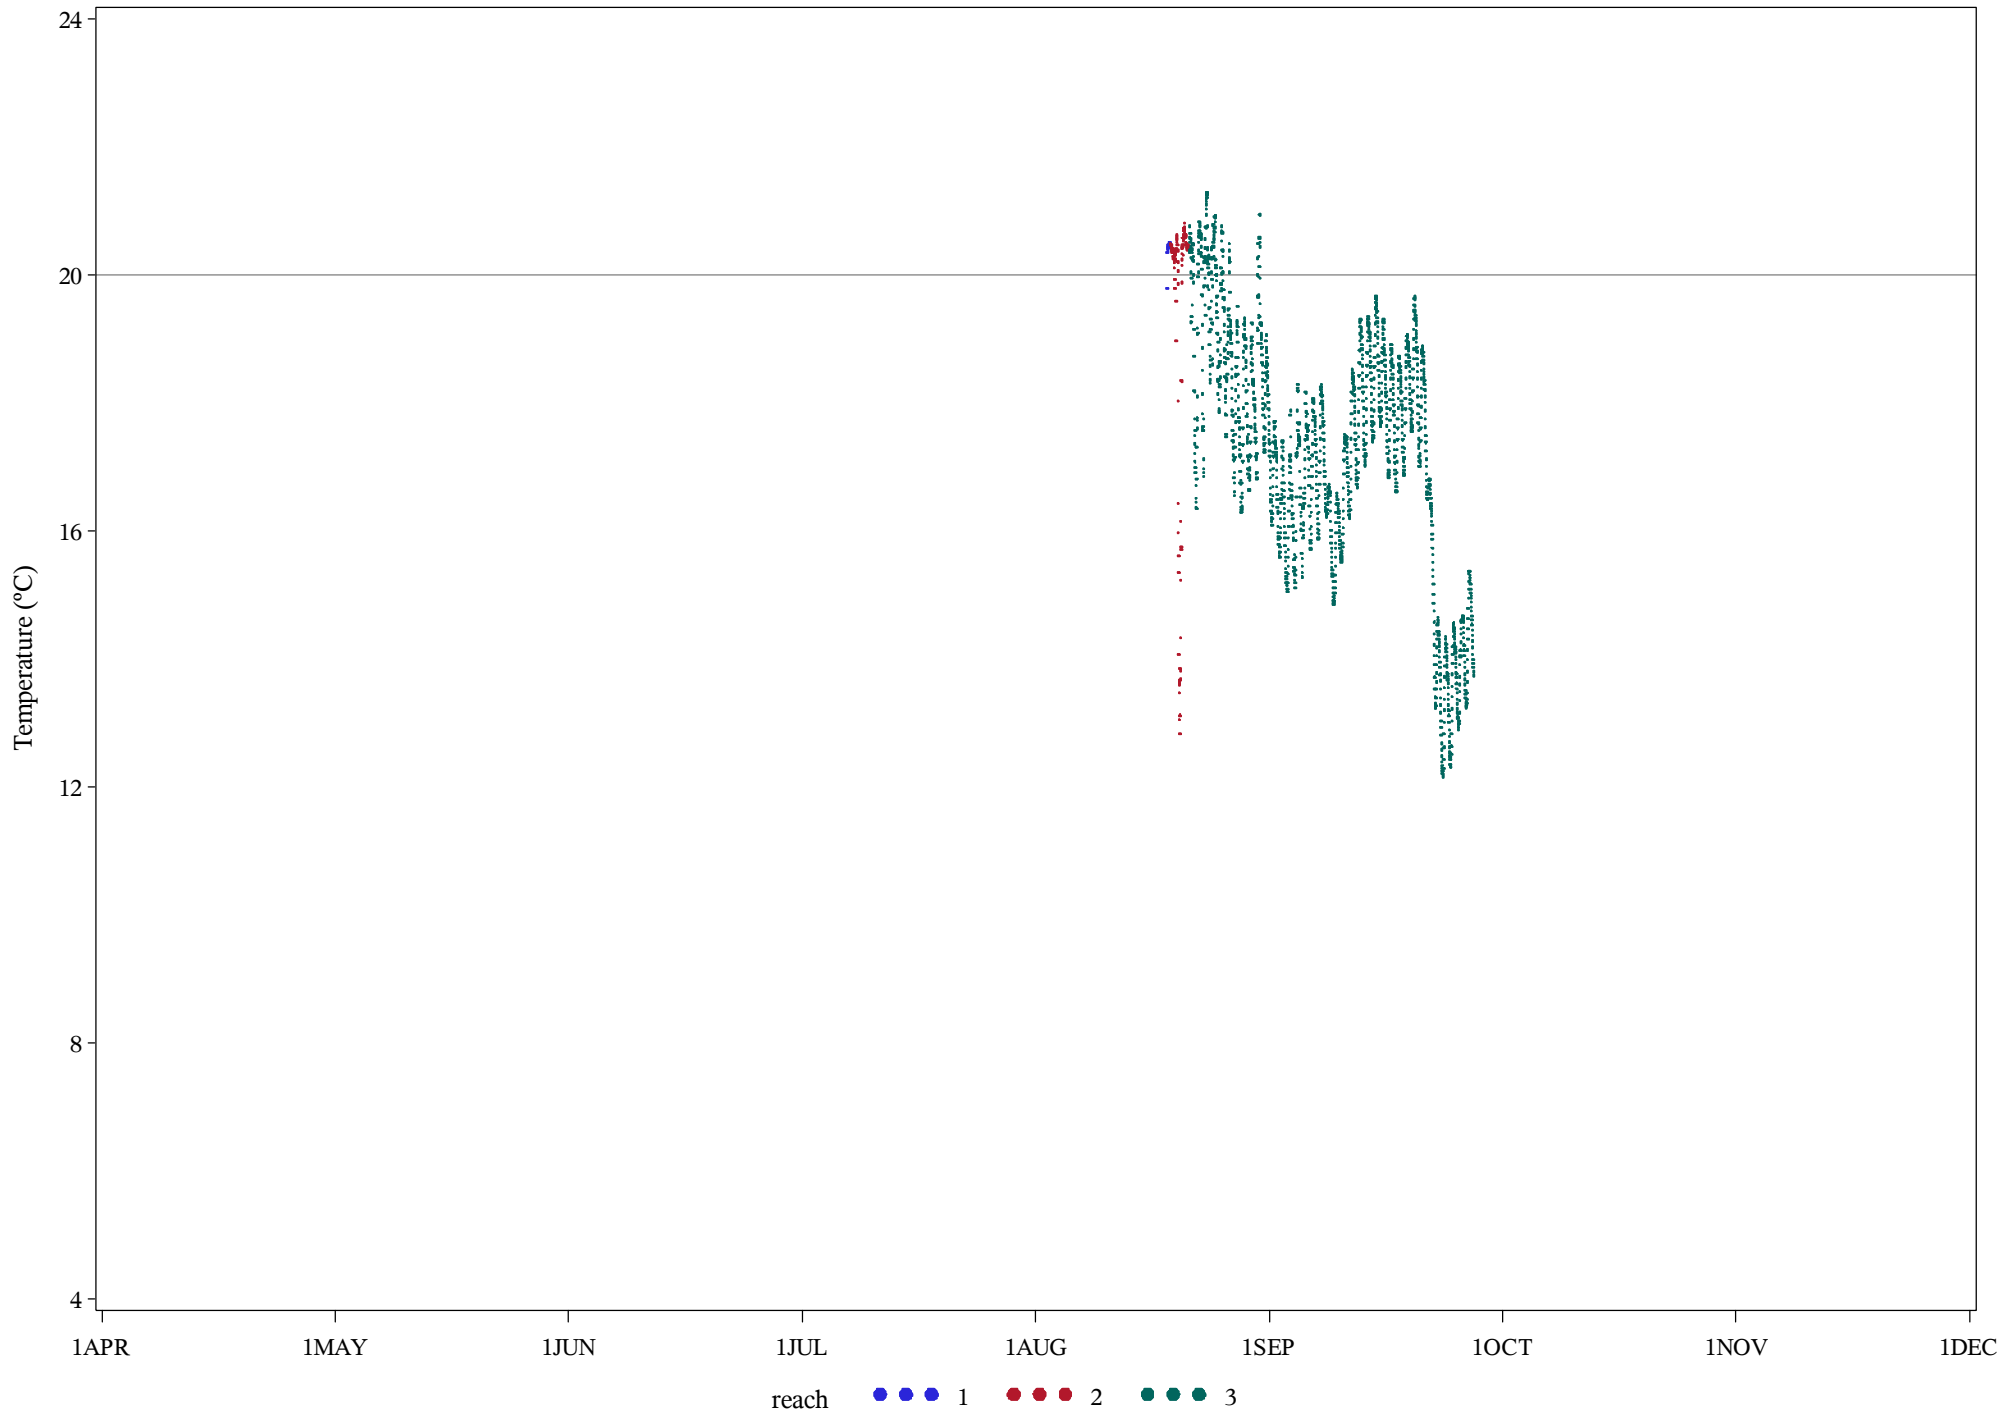



# Steelhead 3781B

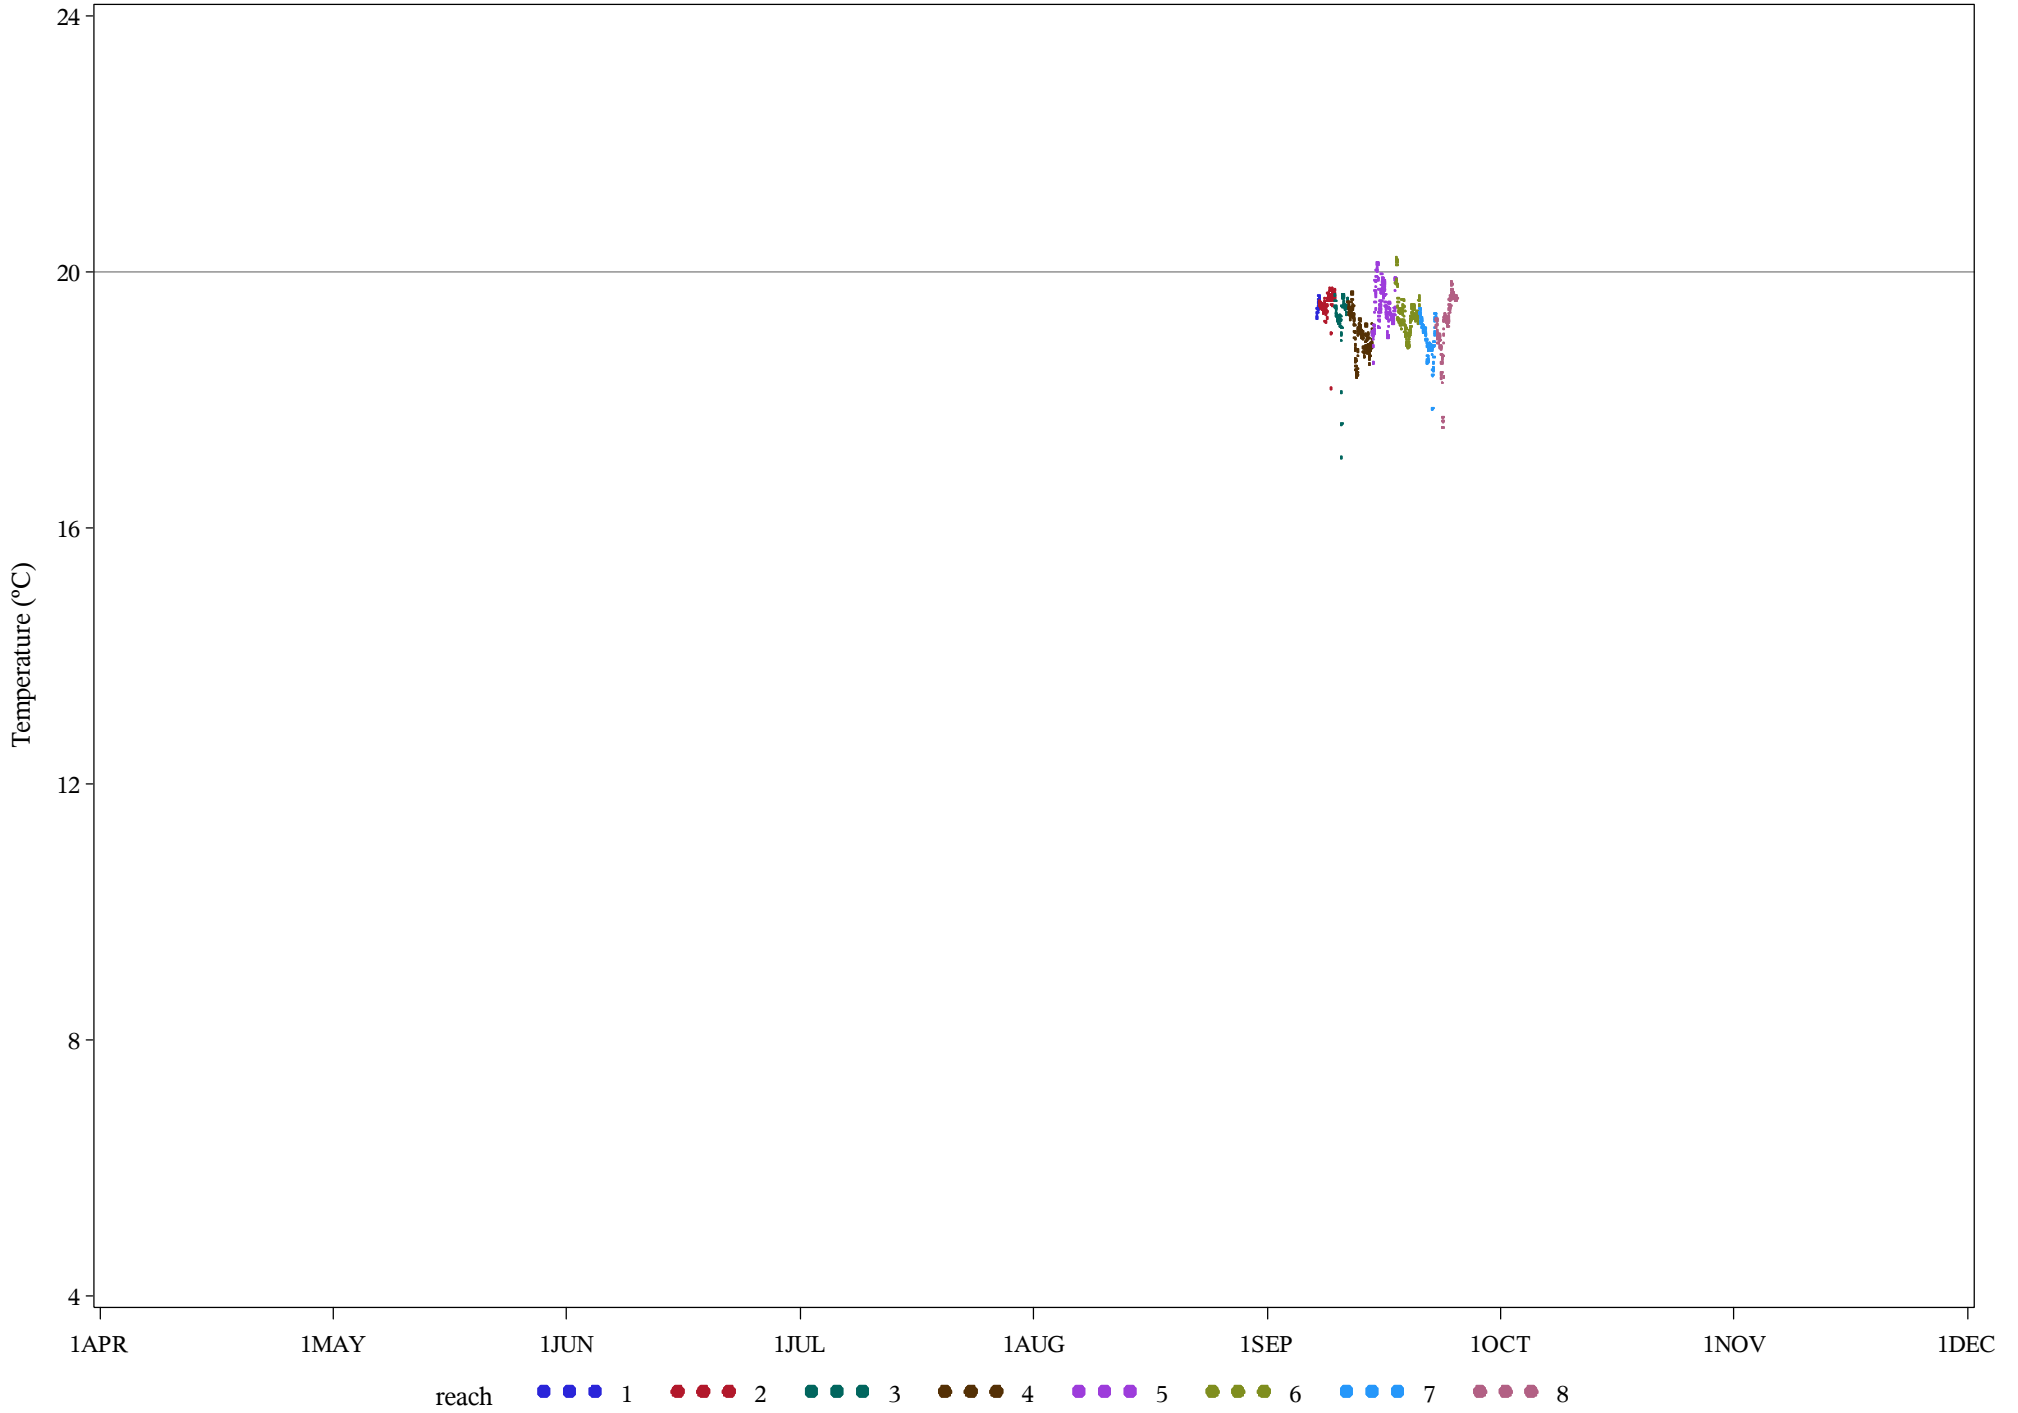

# Steelhead 3781C

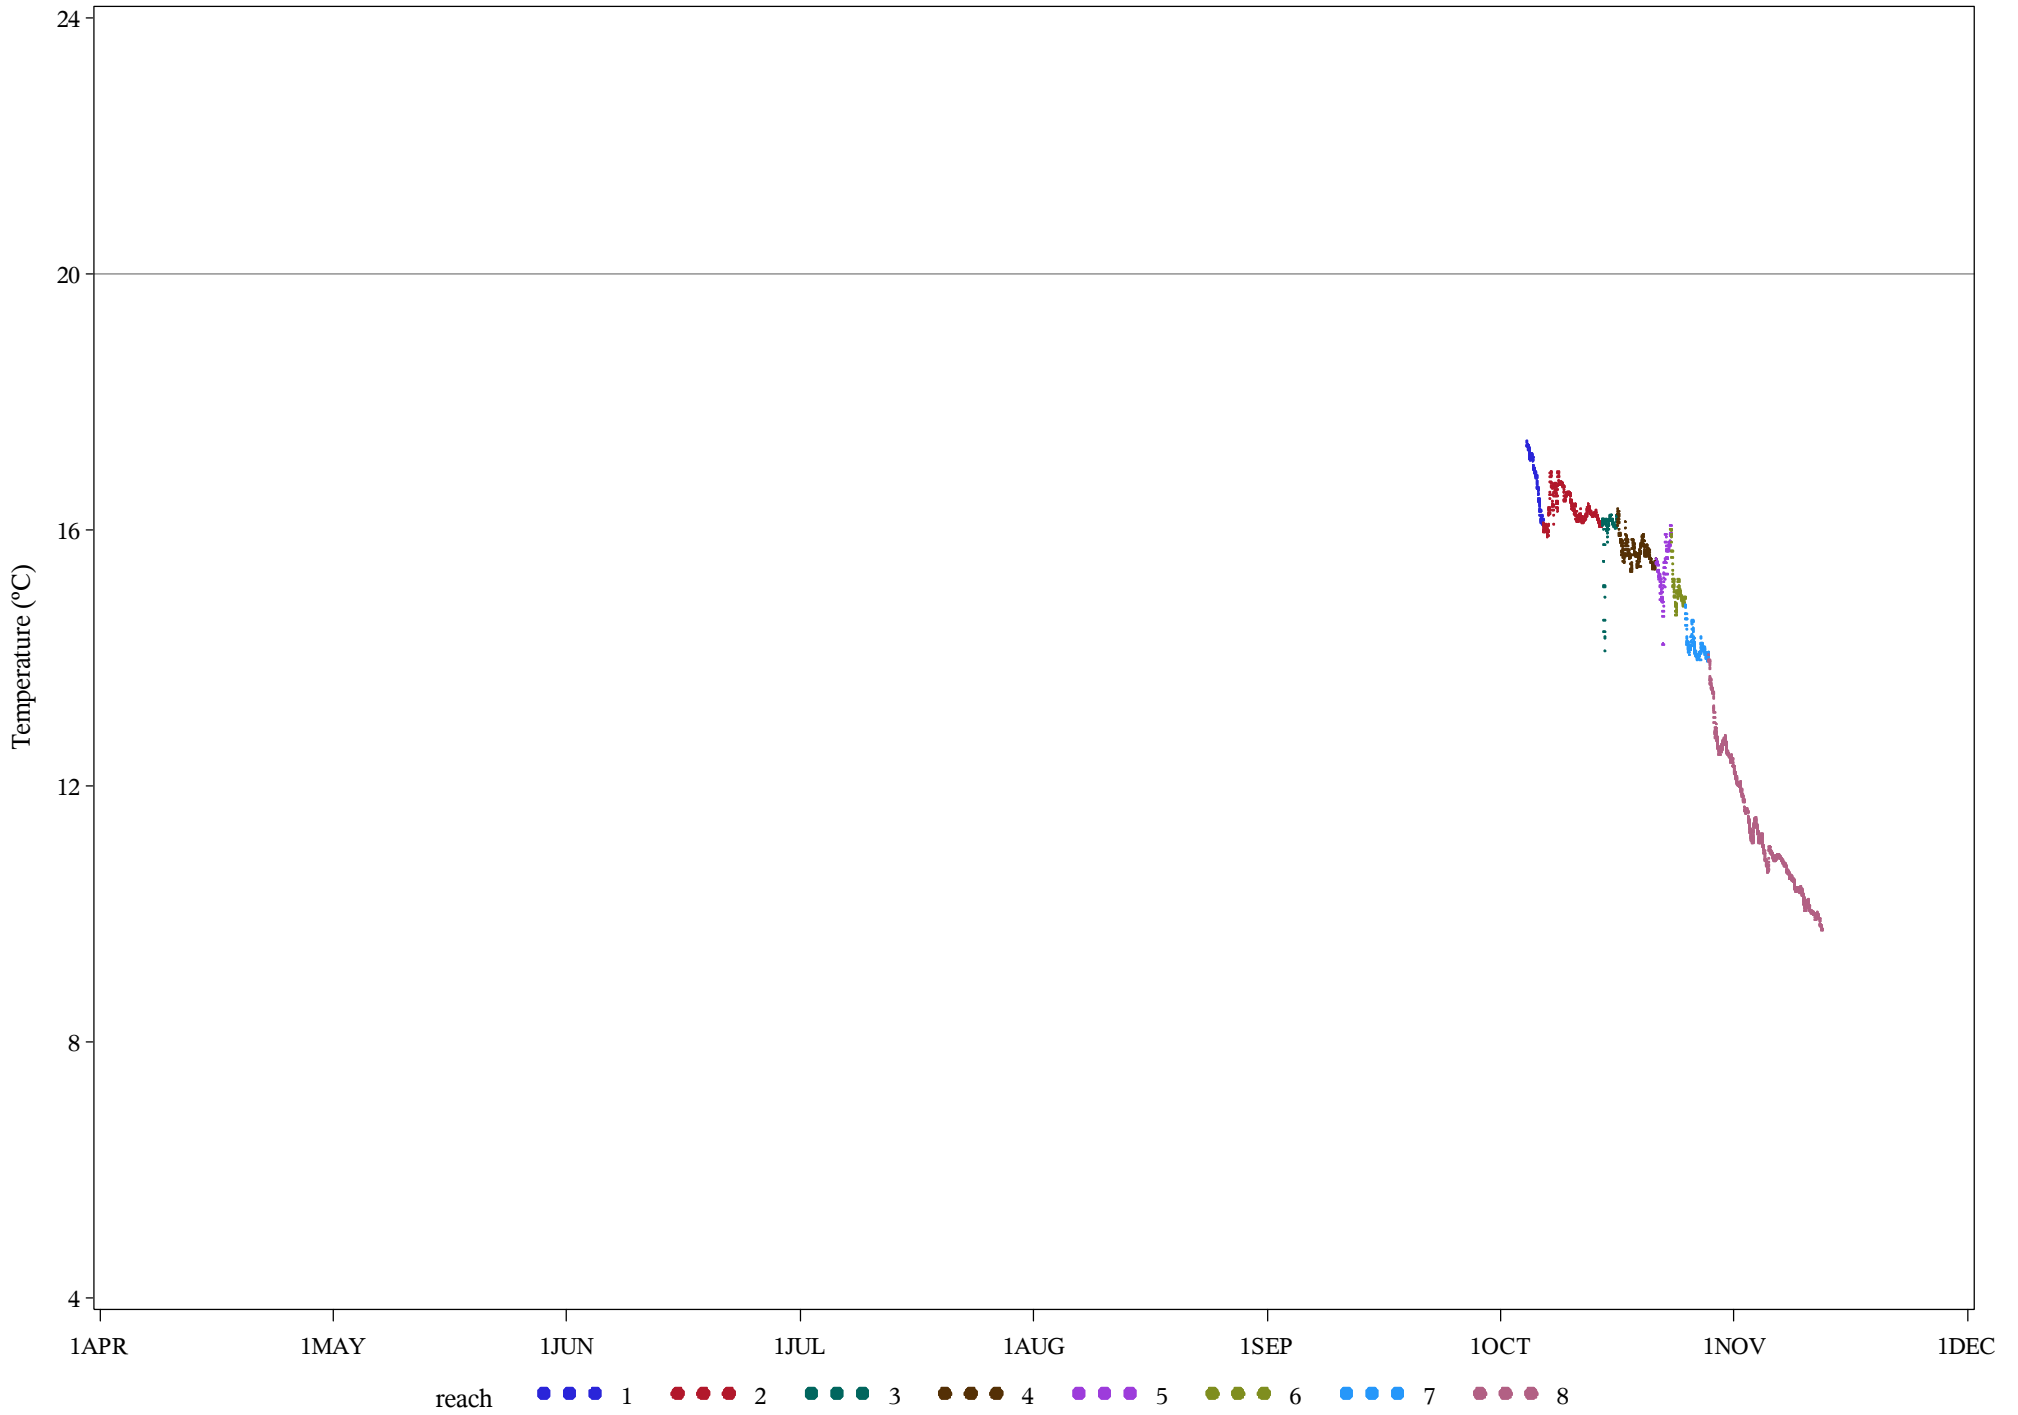

Steelhead  
3787B

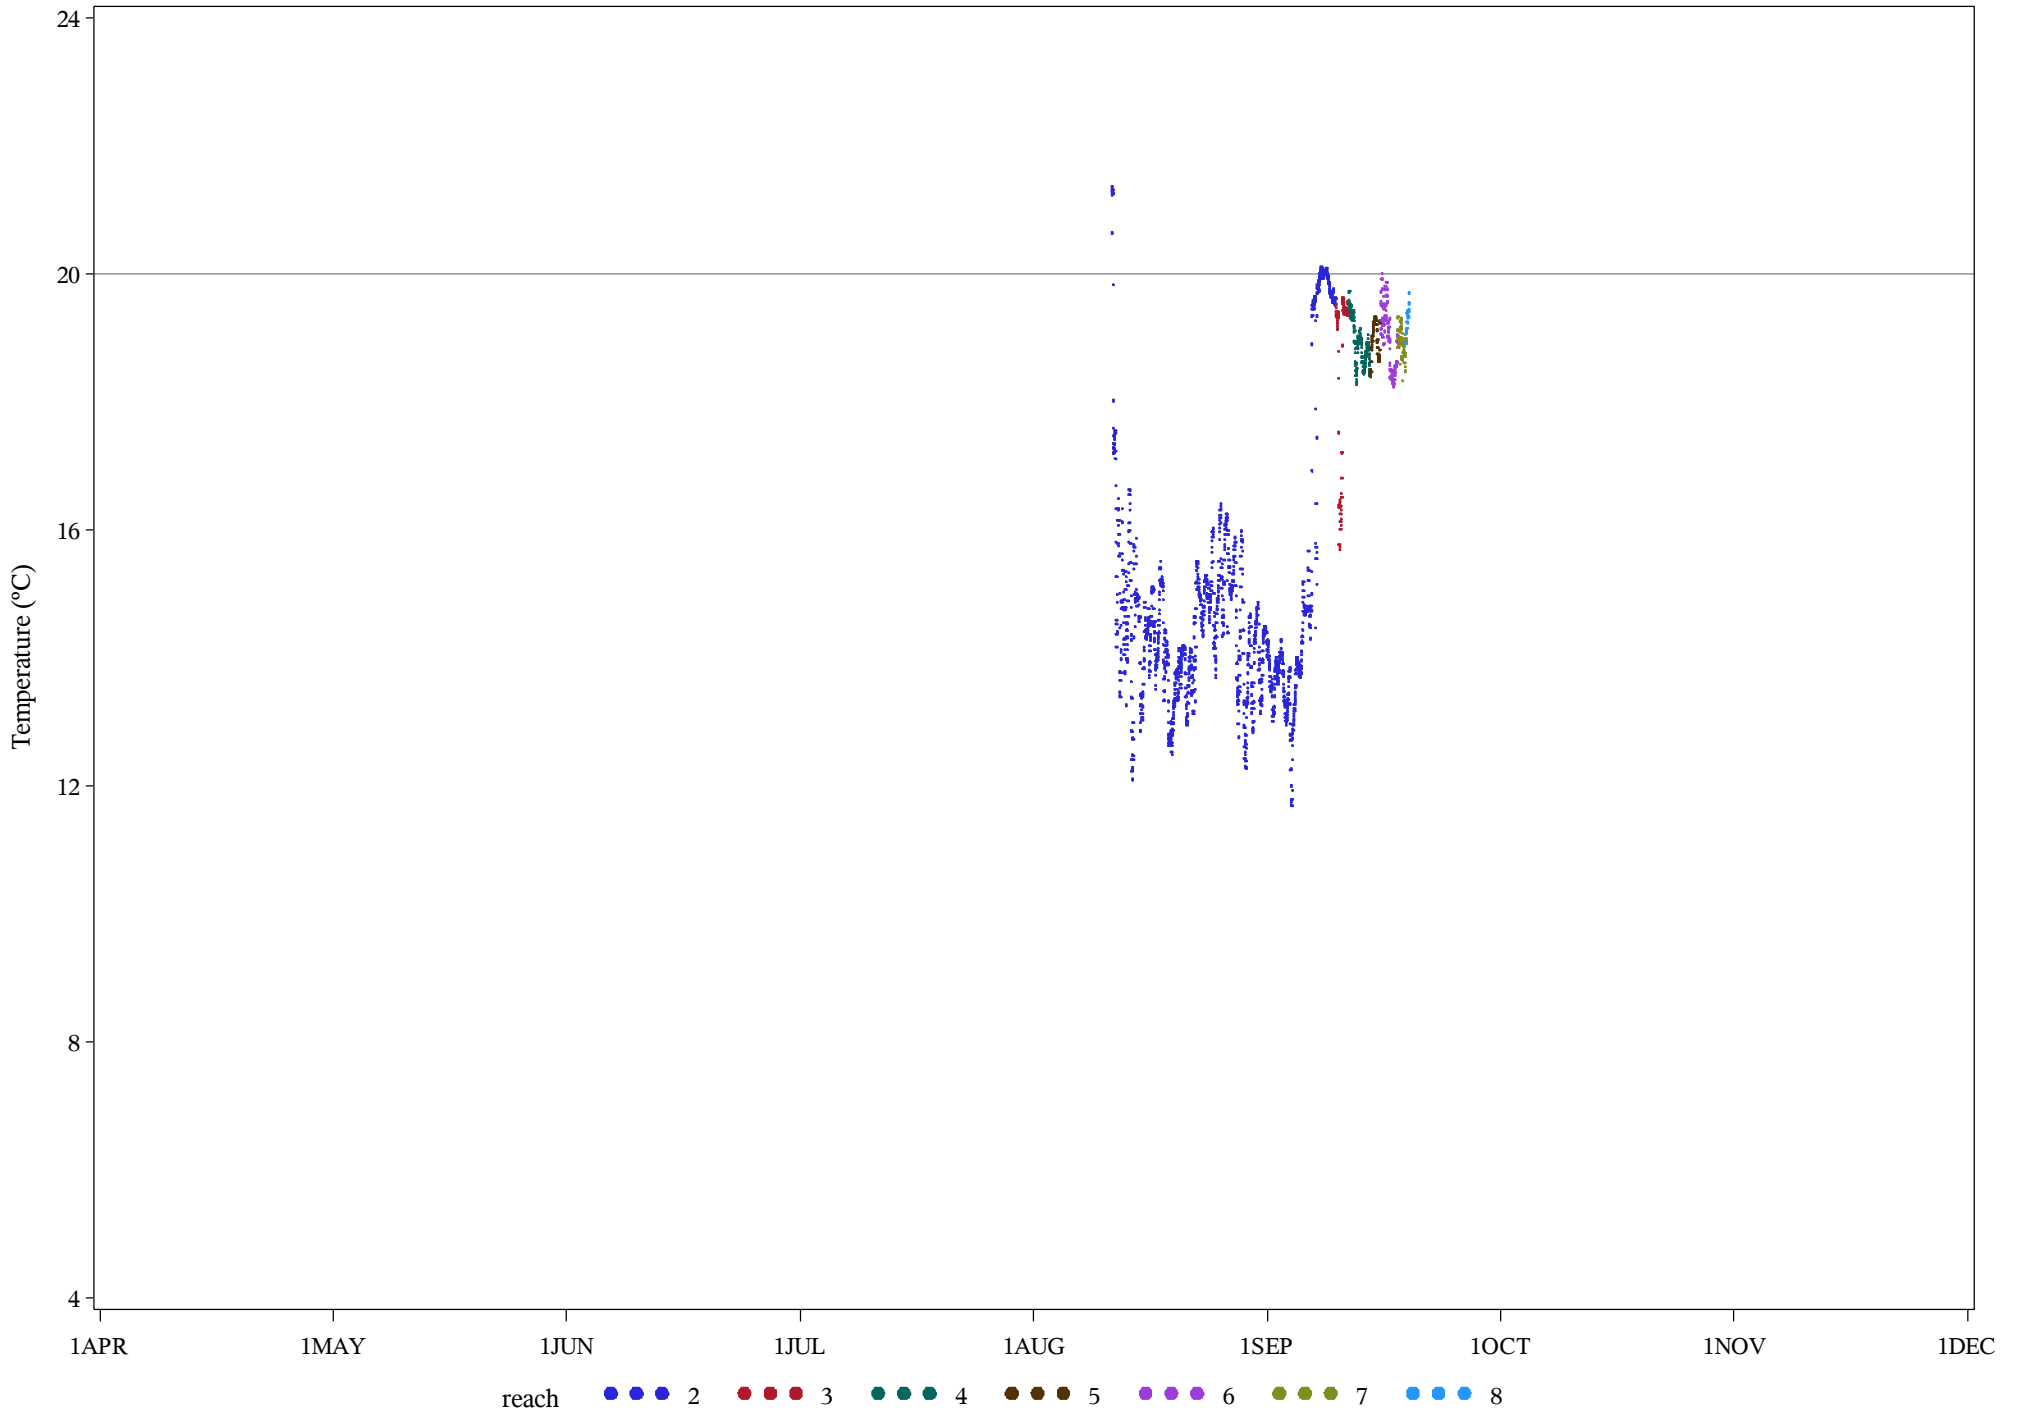

Steelhead  
3790A

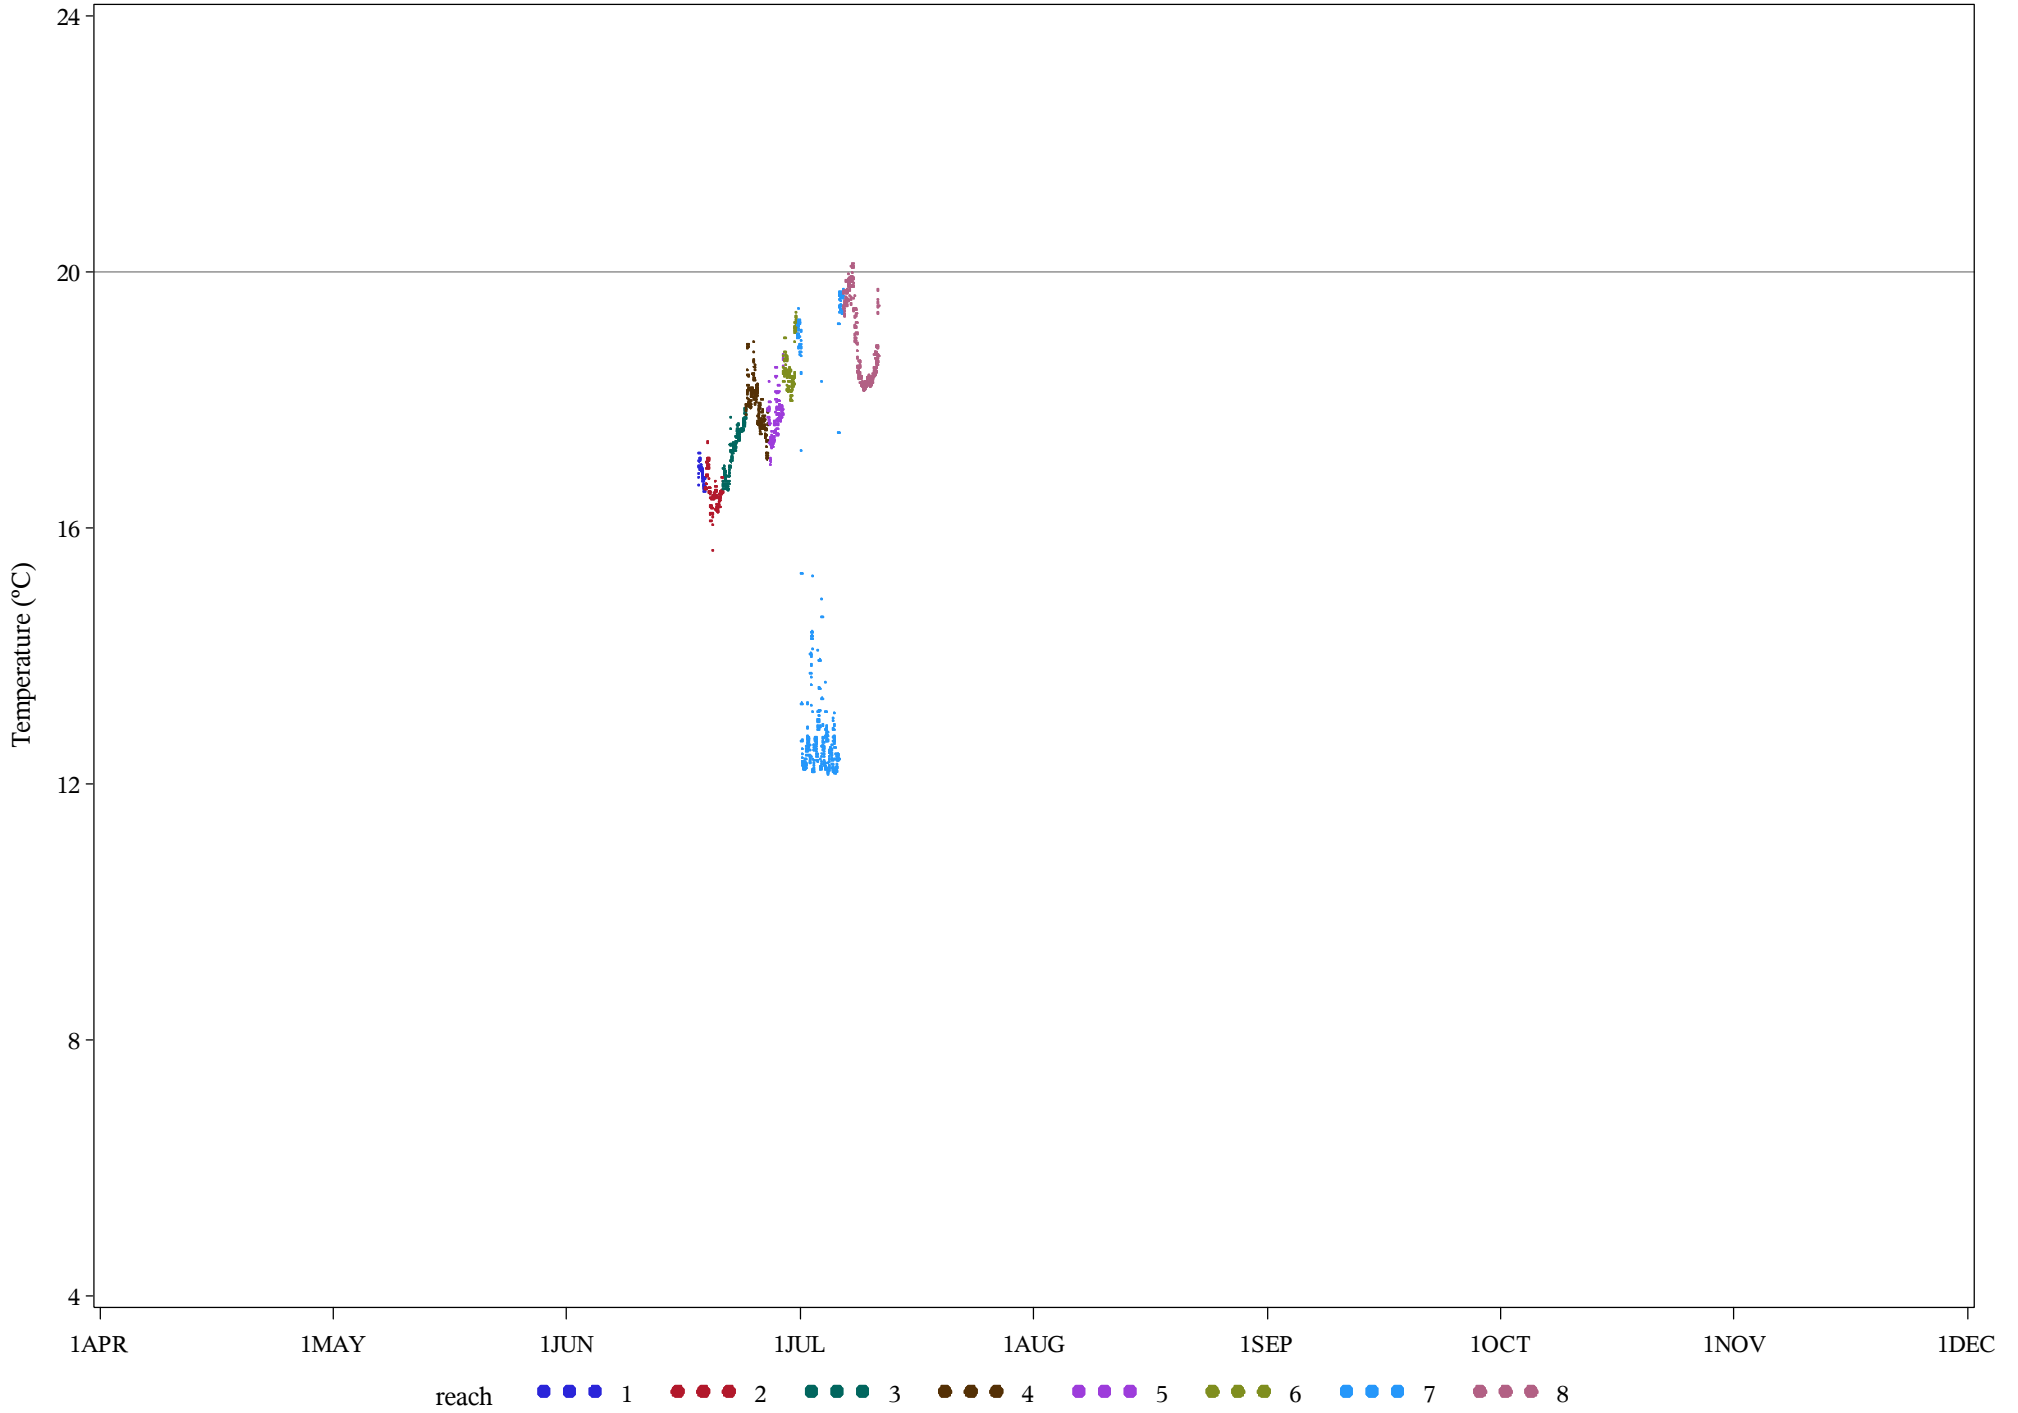

# Steelhead 3800A

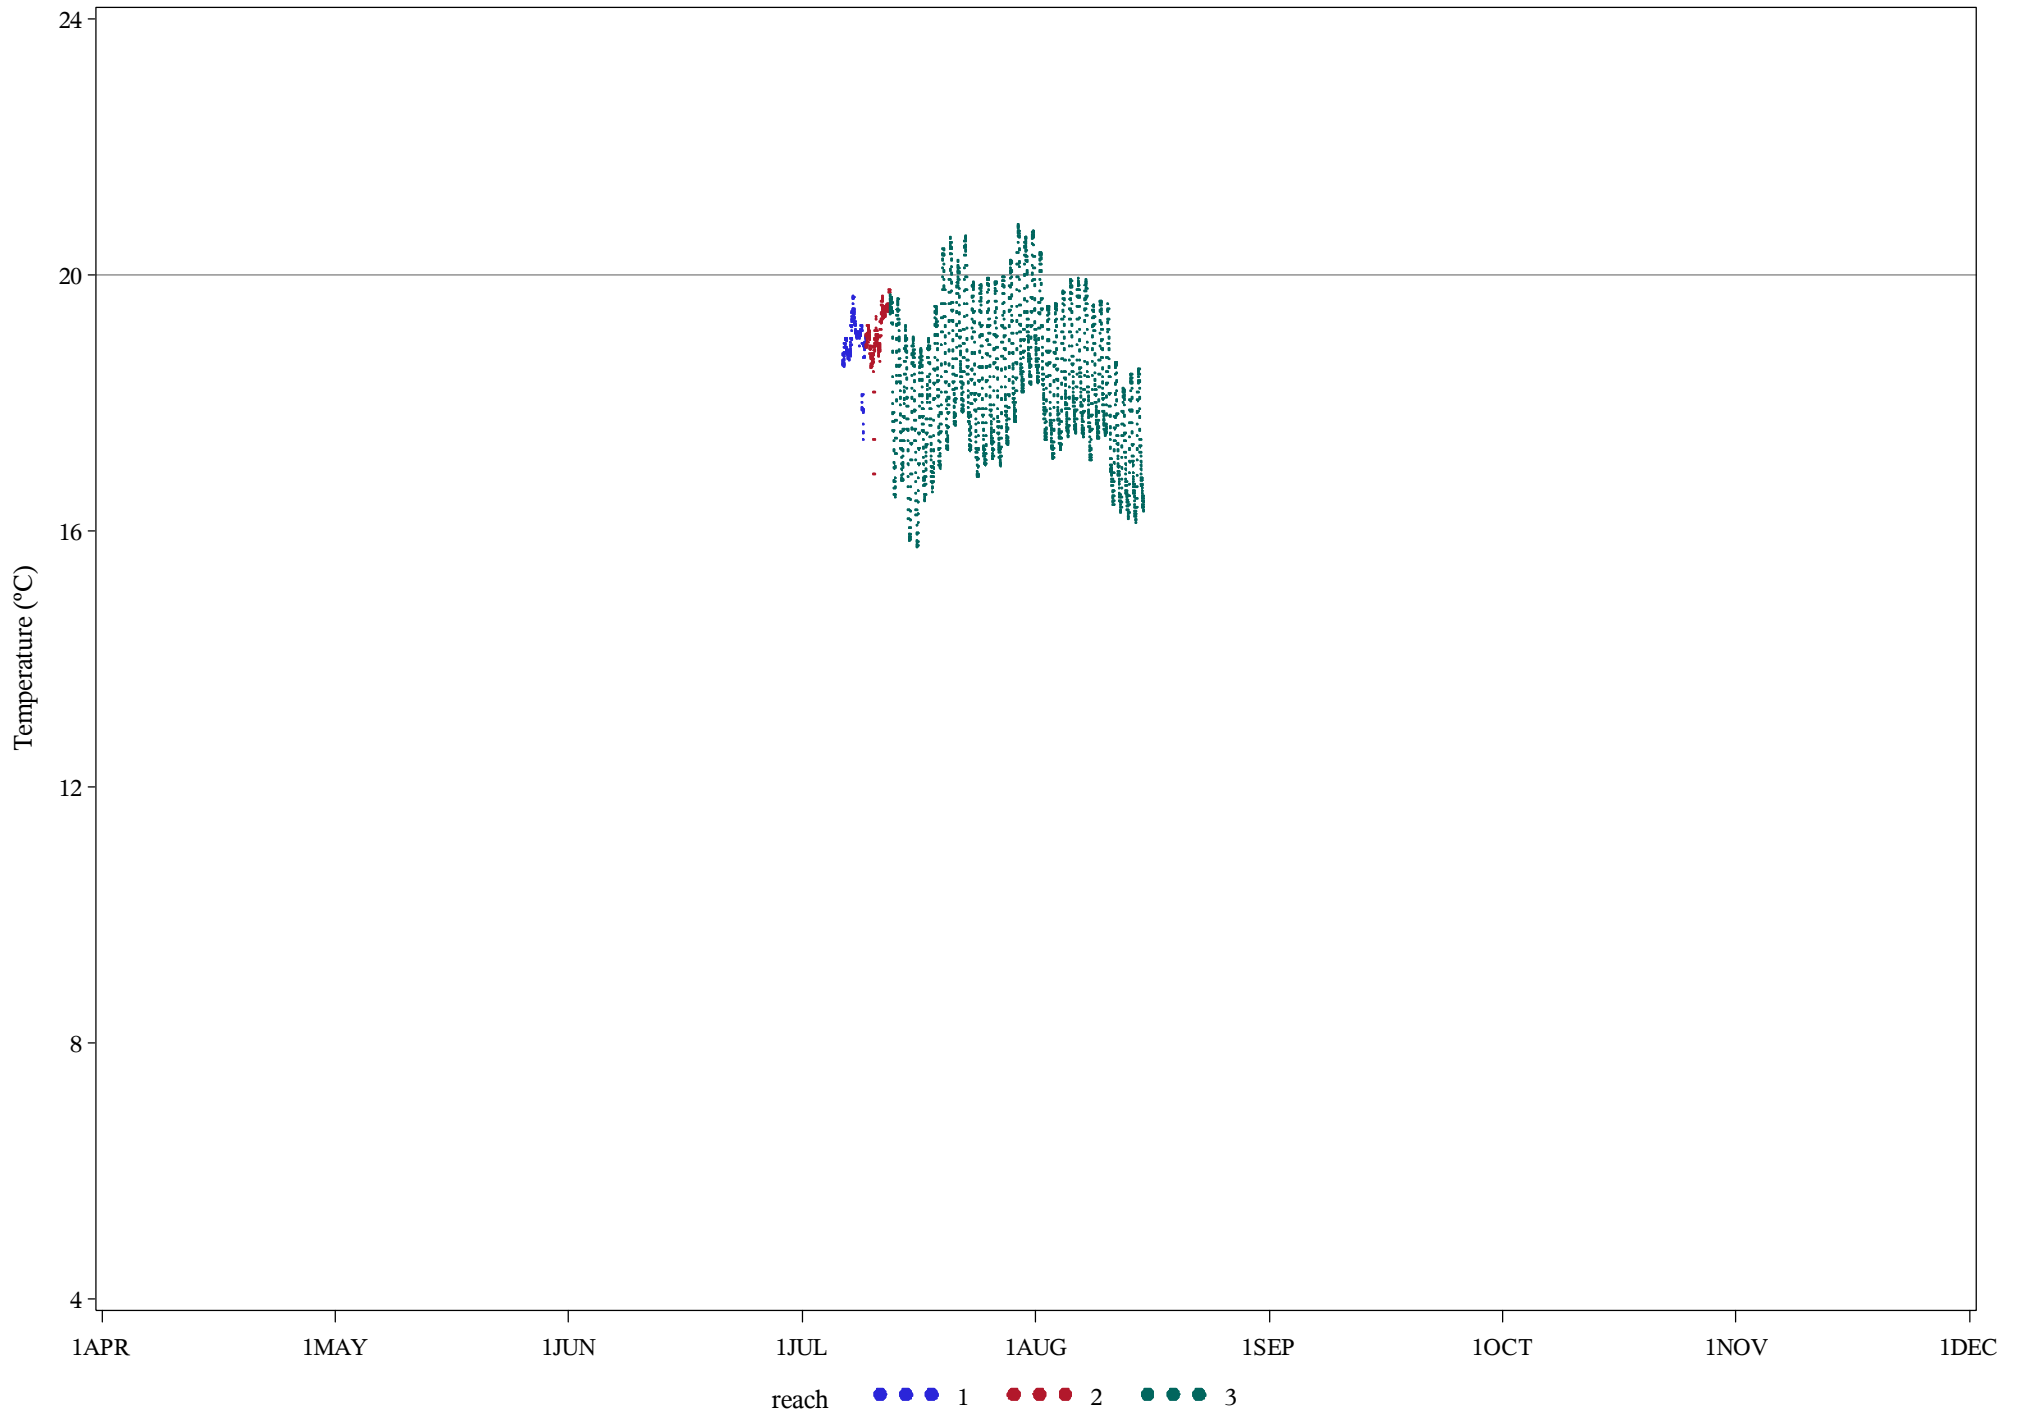



# Steelhead 3814A

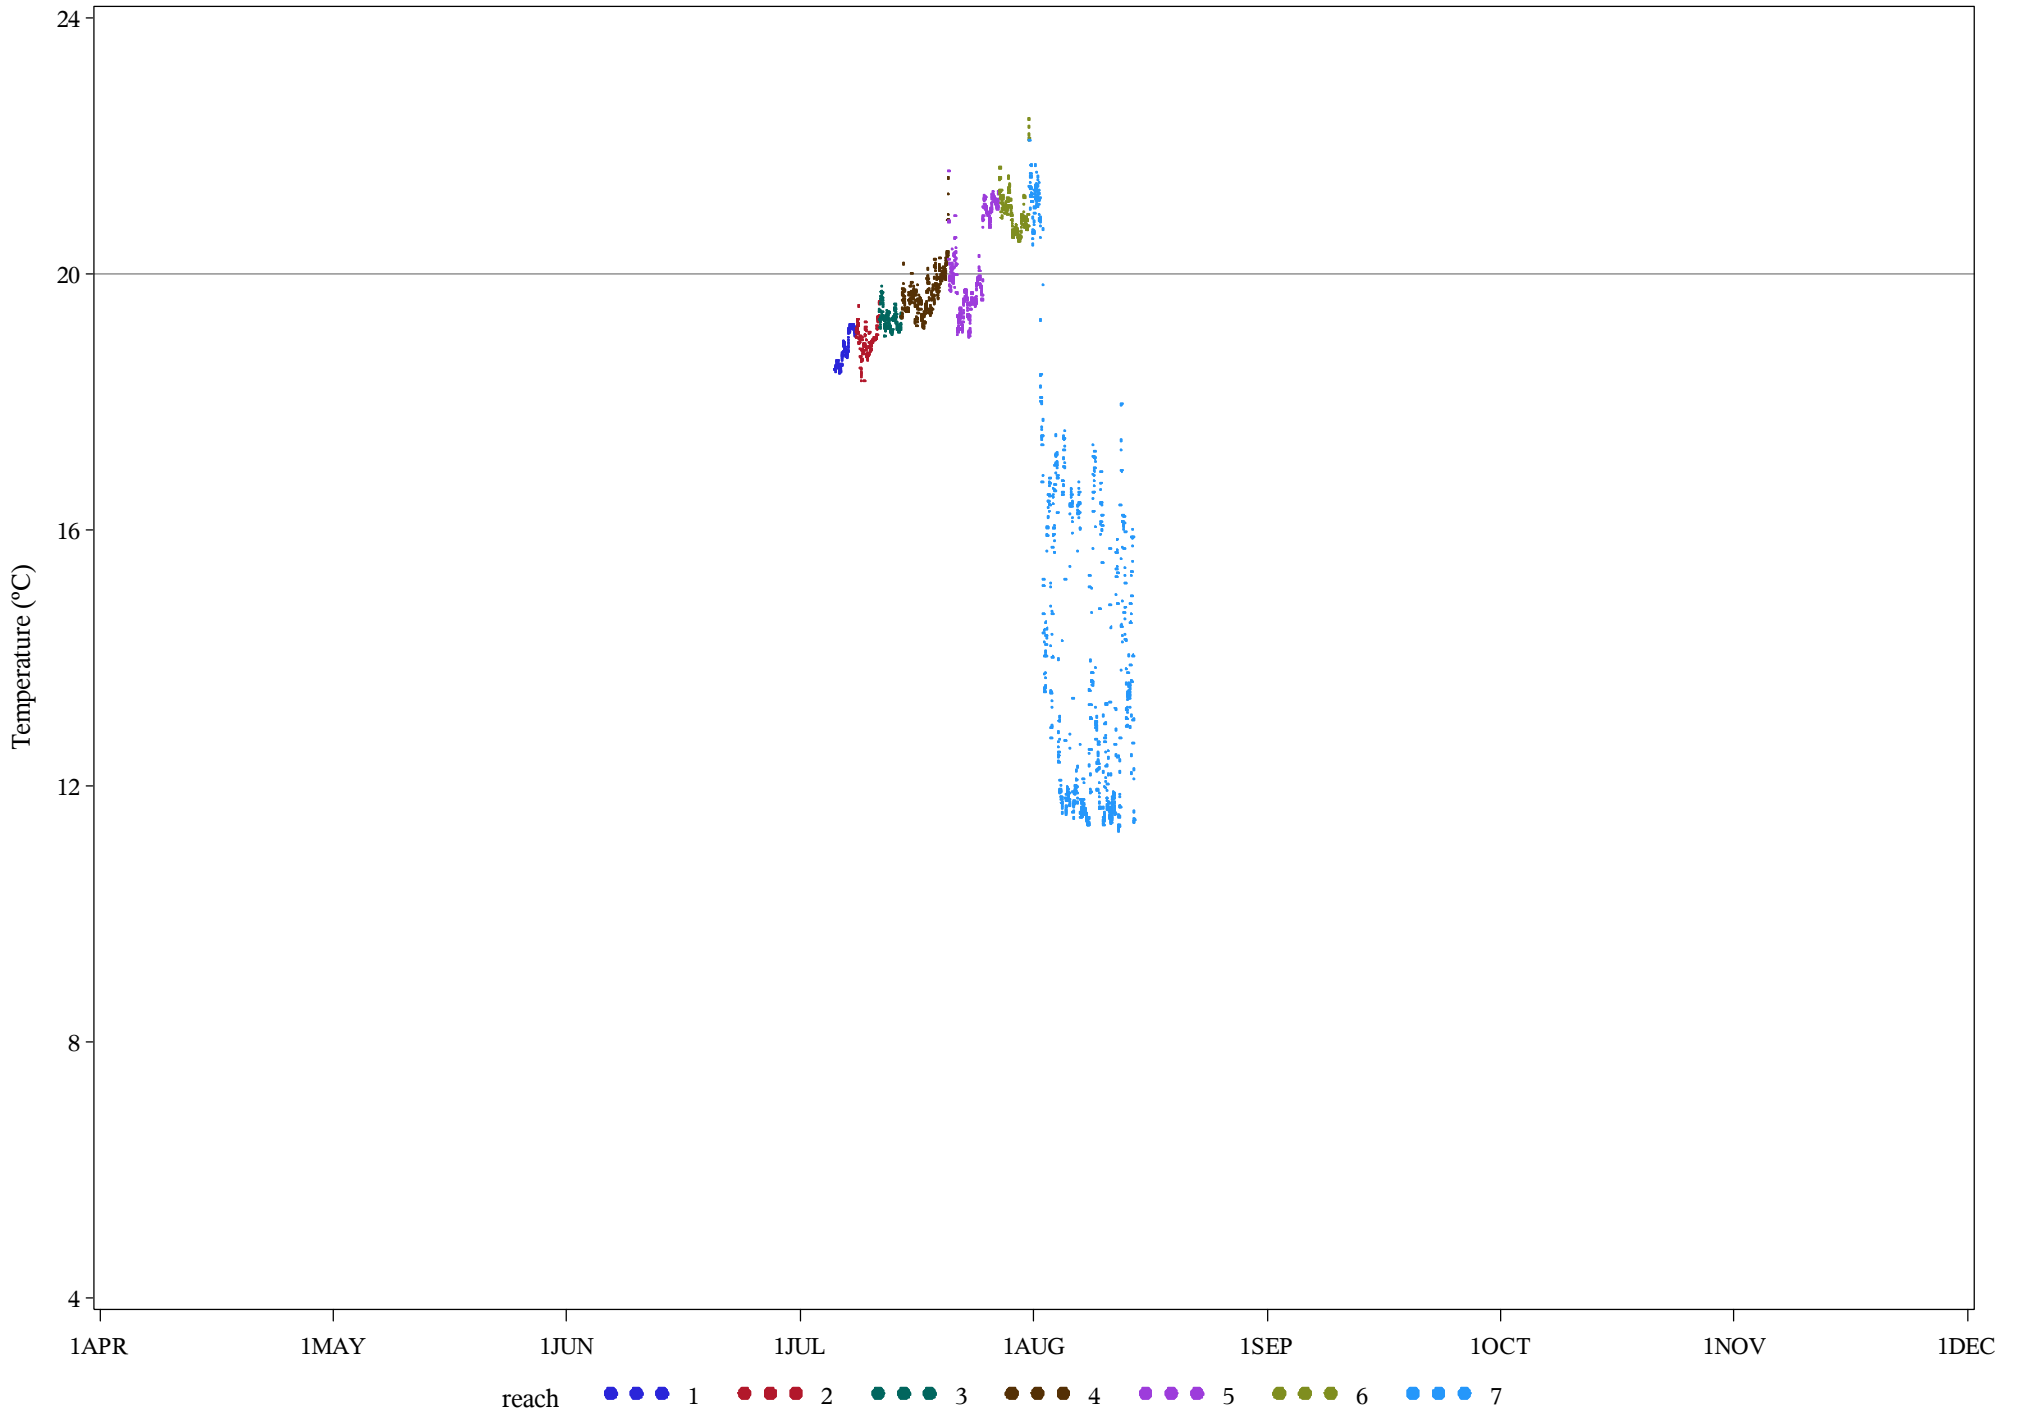





# Steelhead 3830A

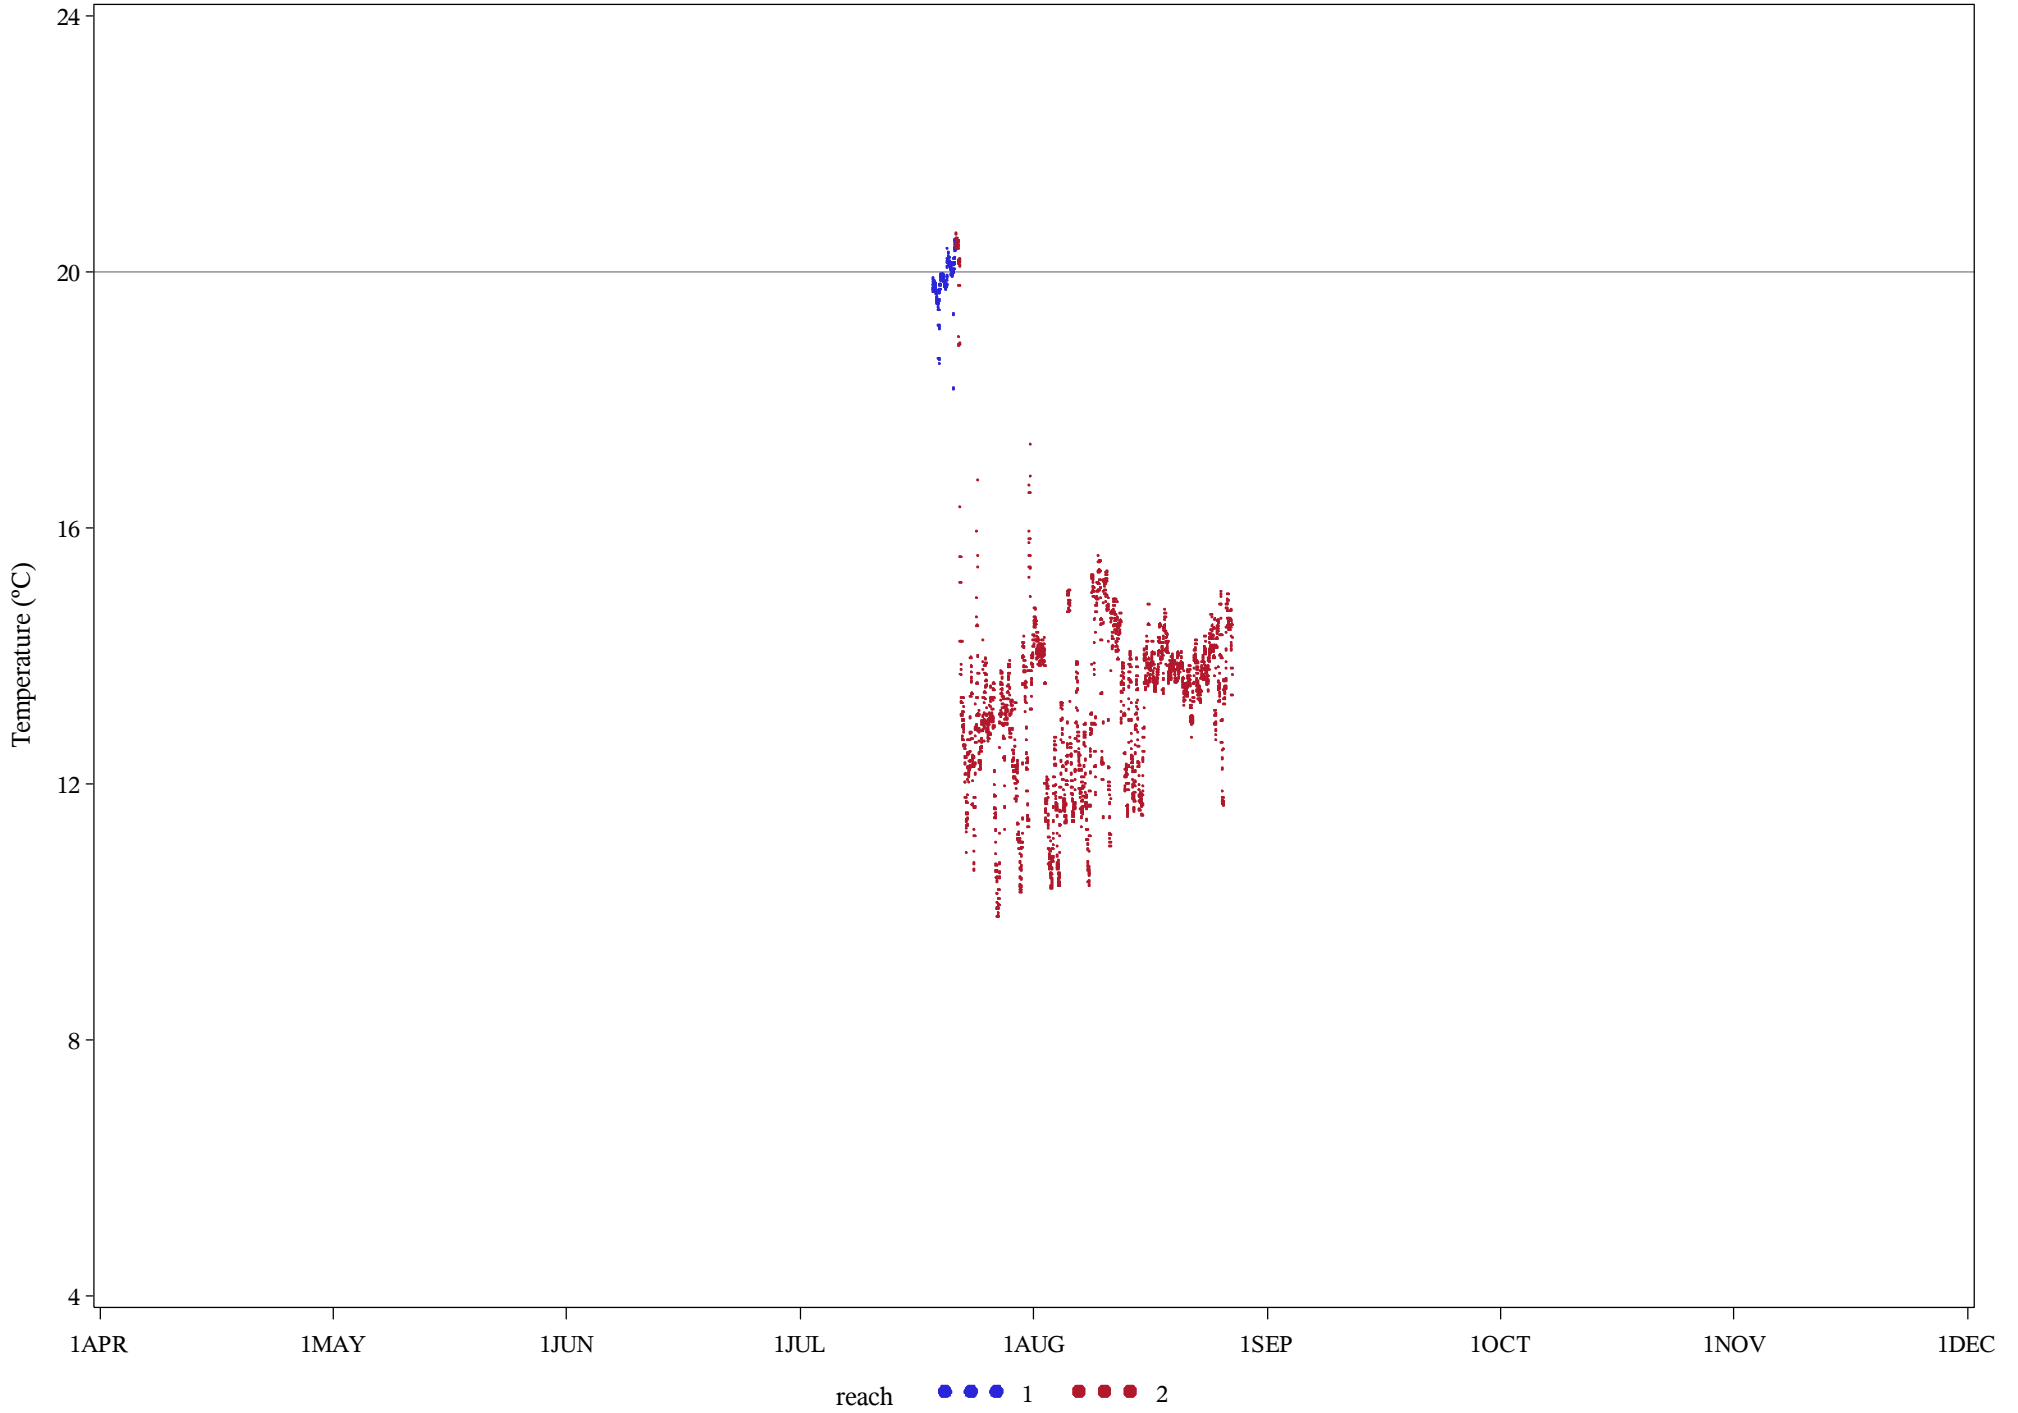

Steelhead  
3831A

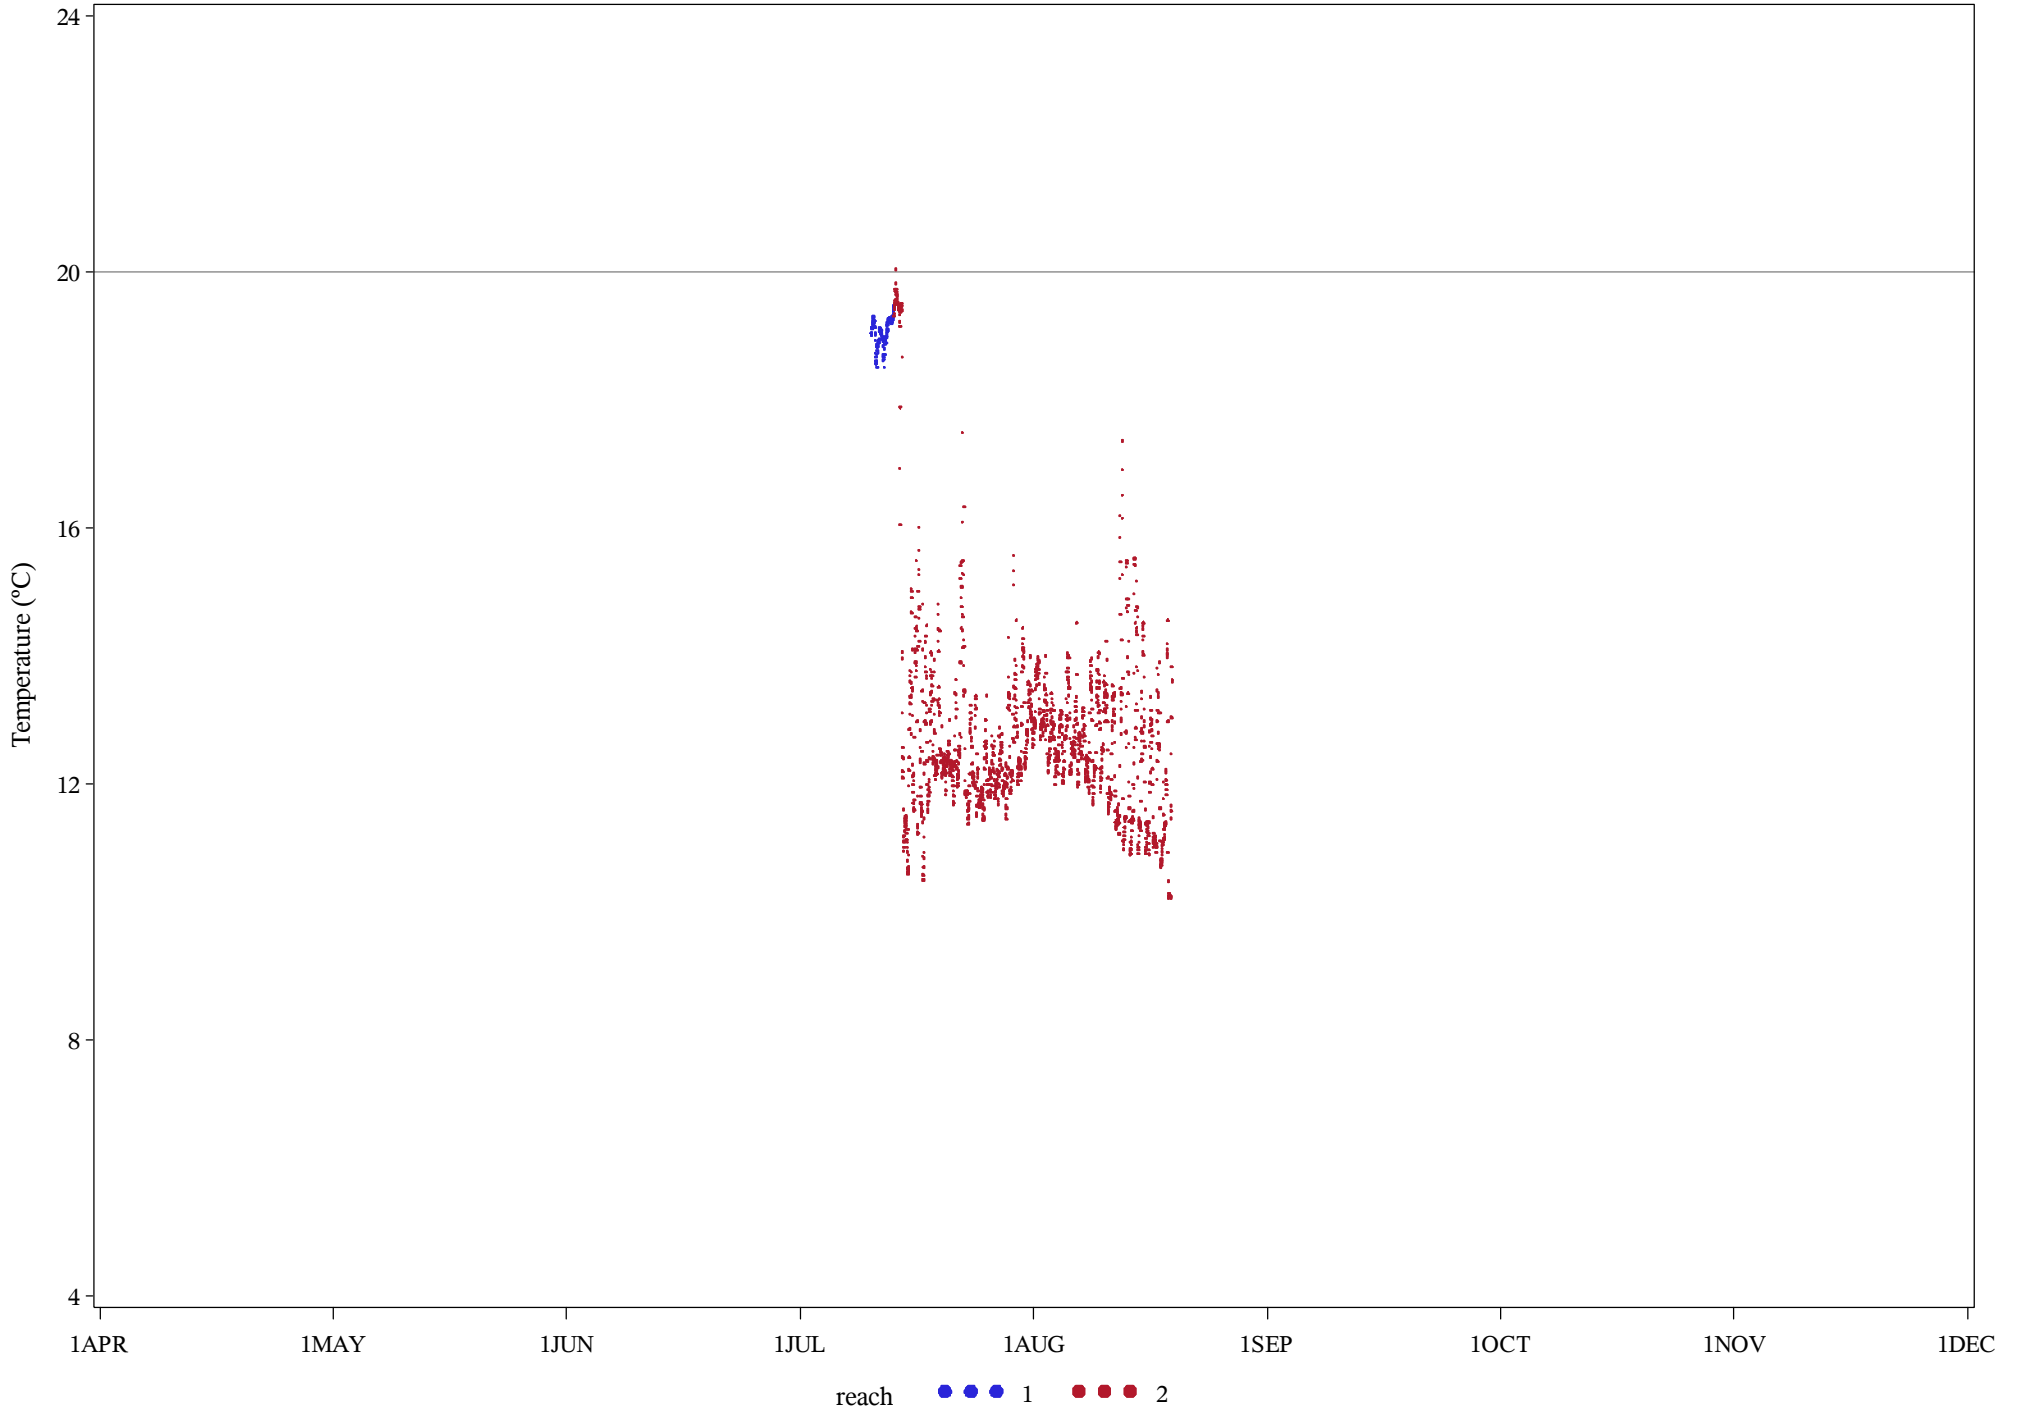

# Steelhead 3845A

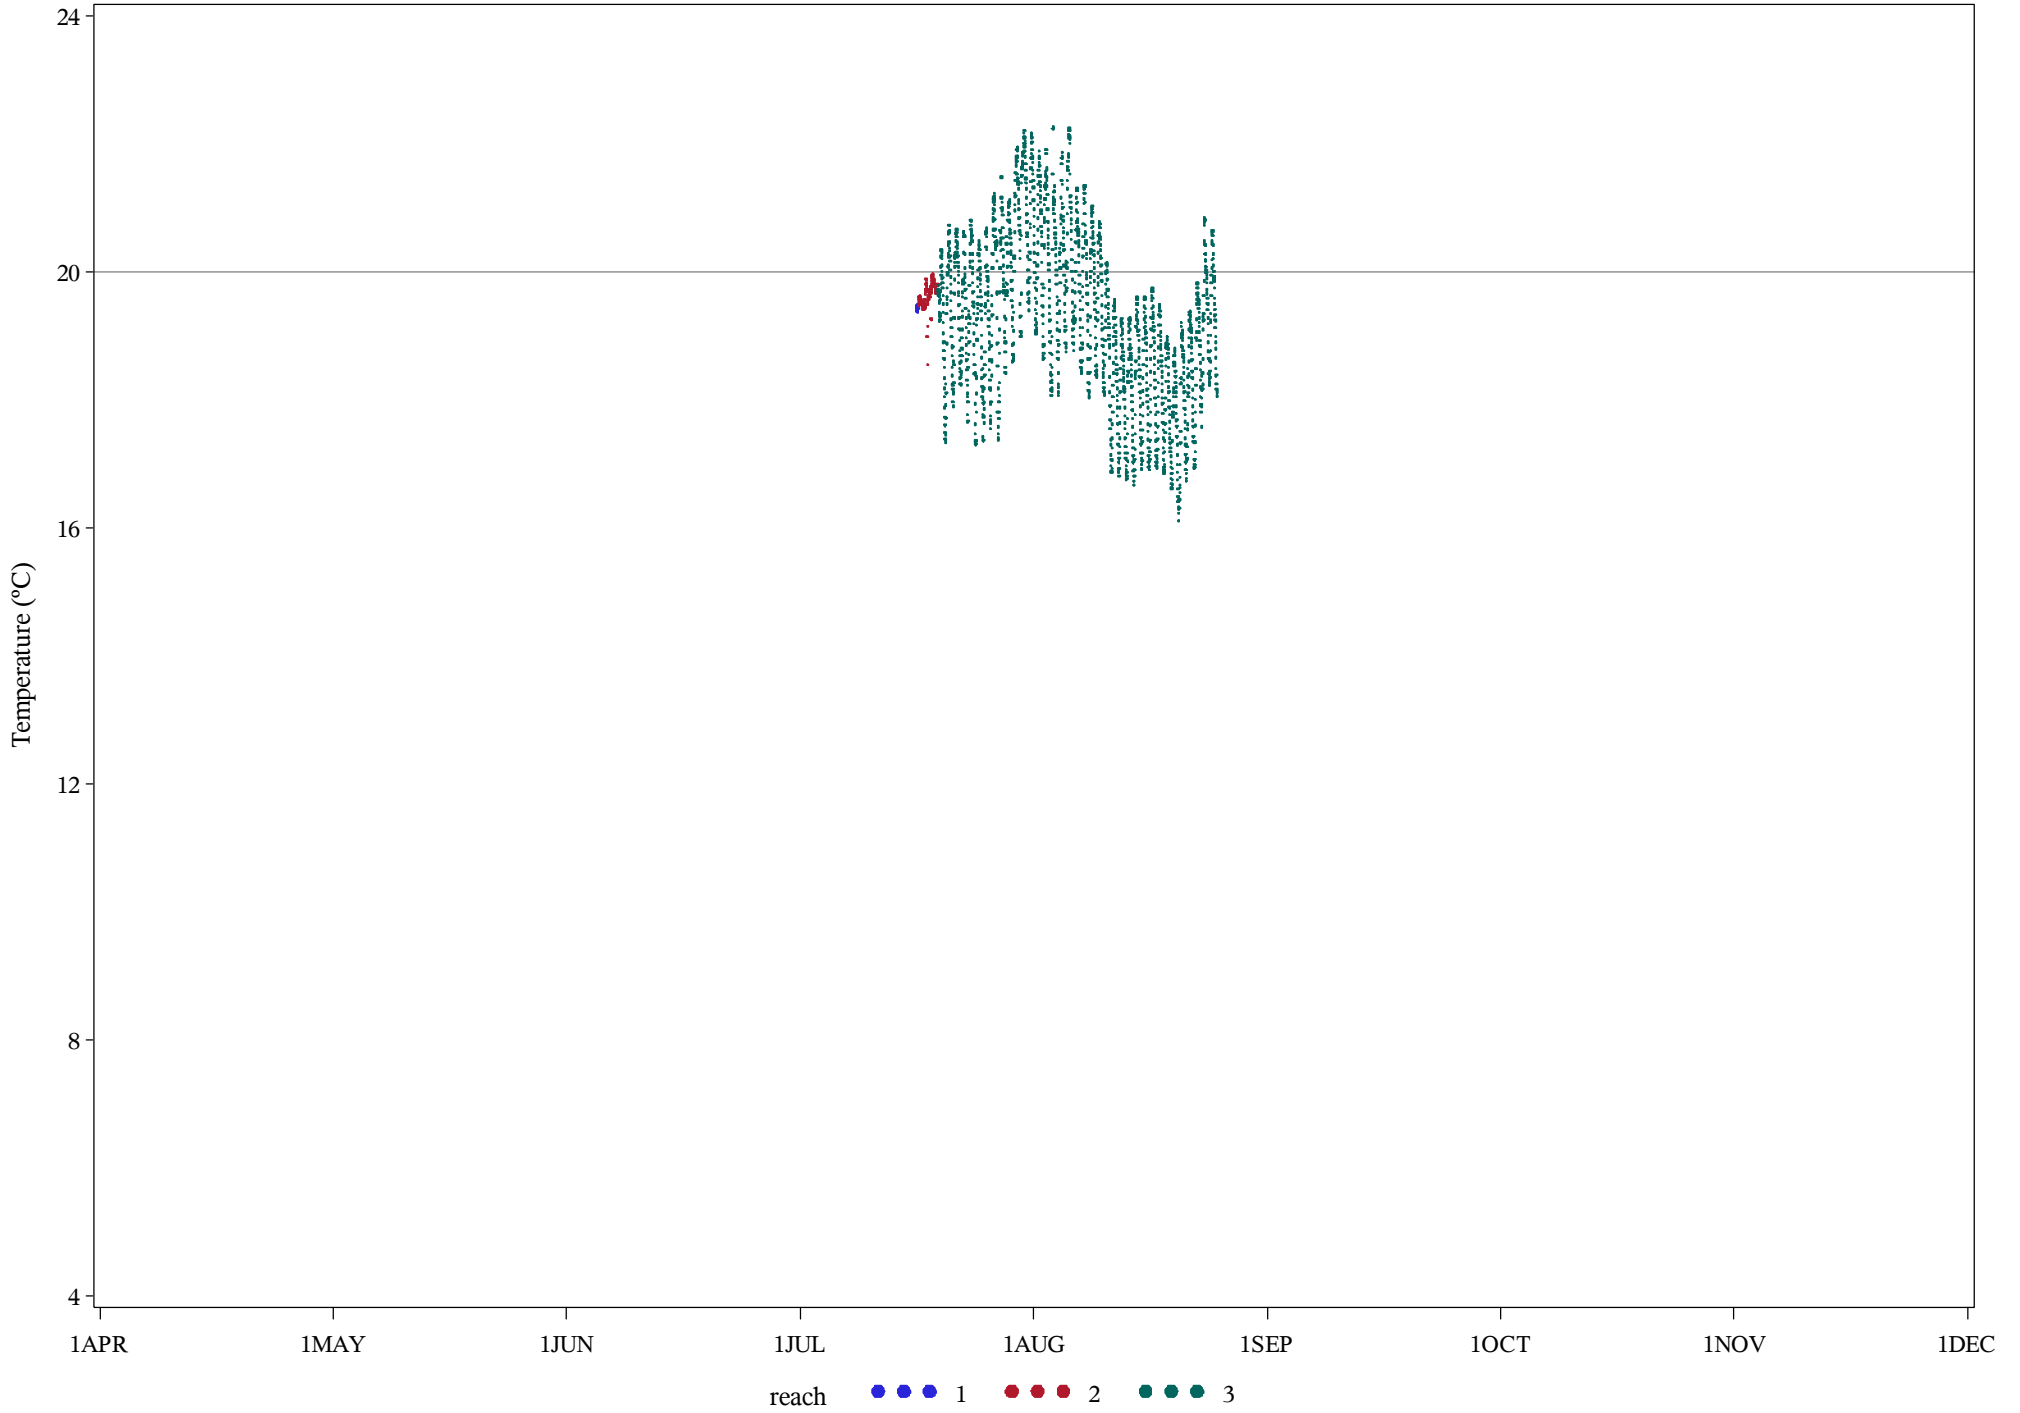

# Steelhead 3860A

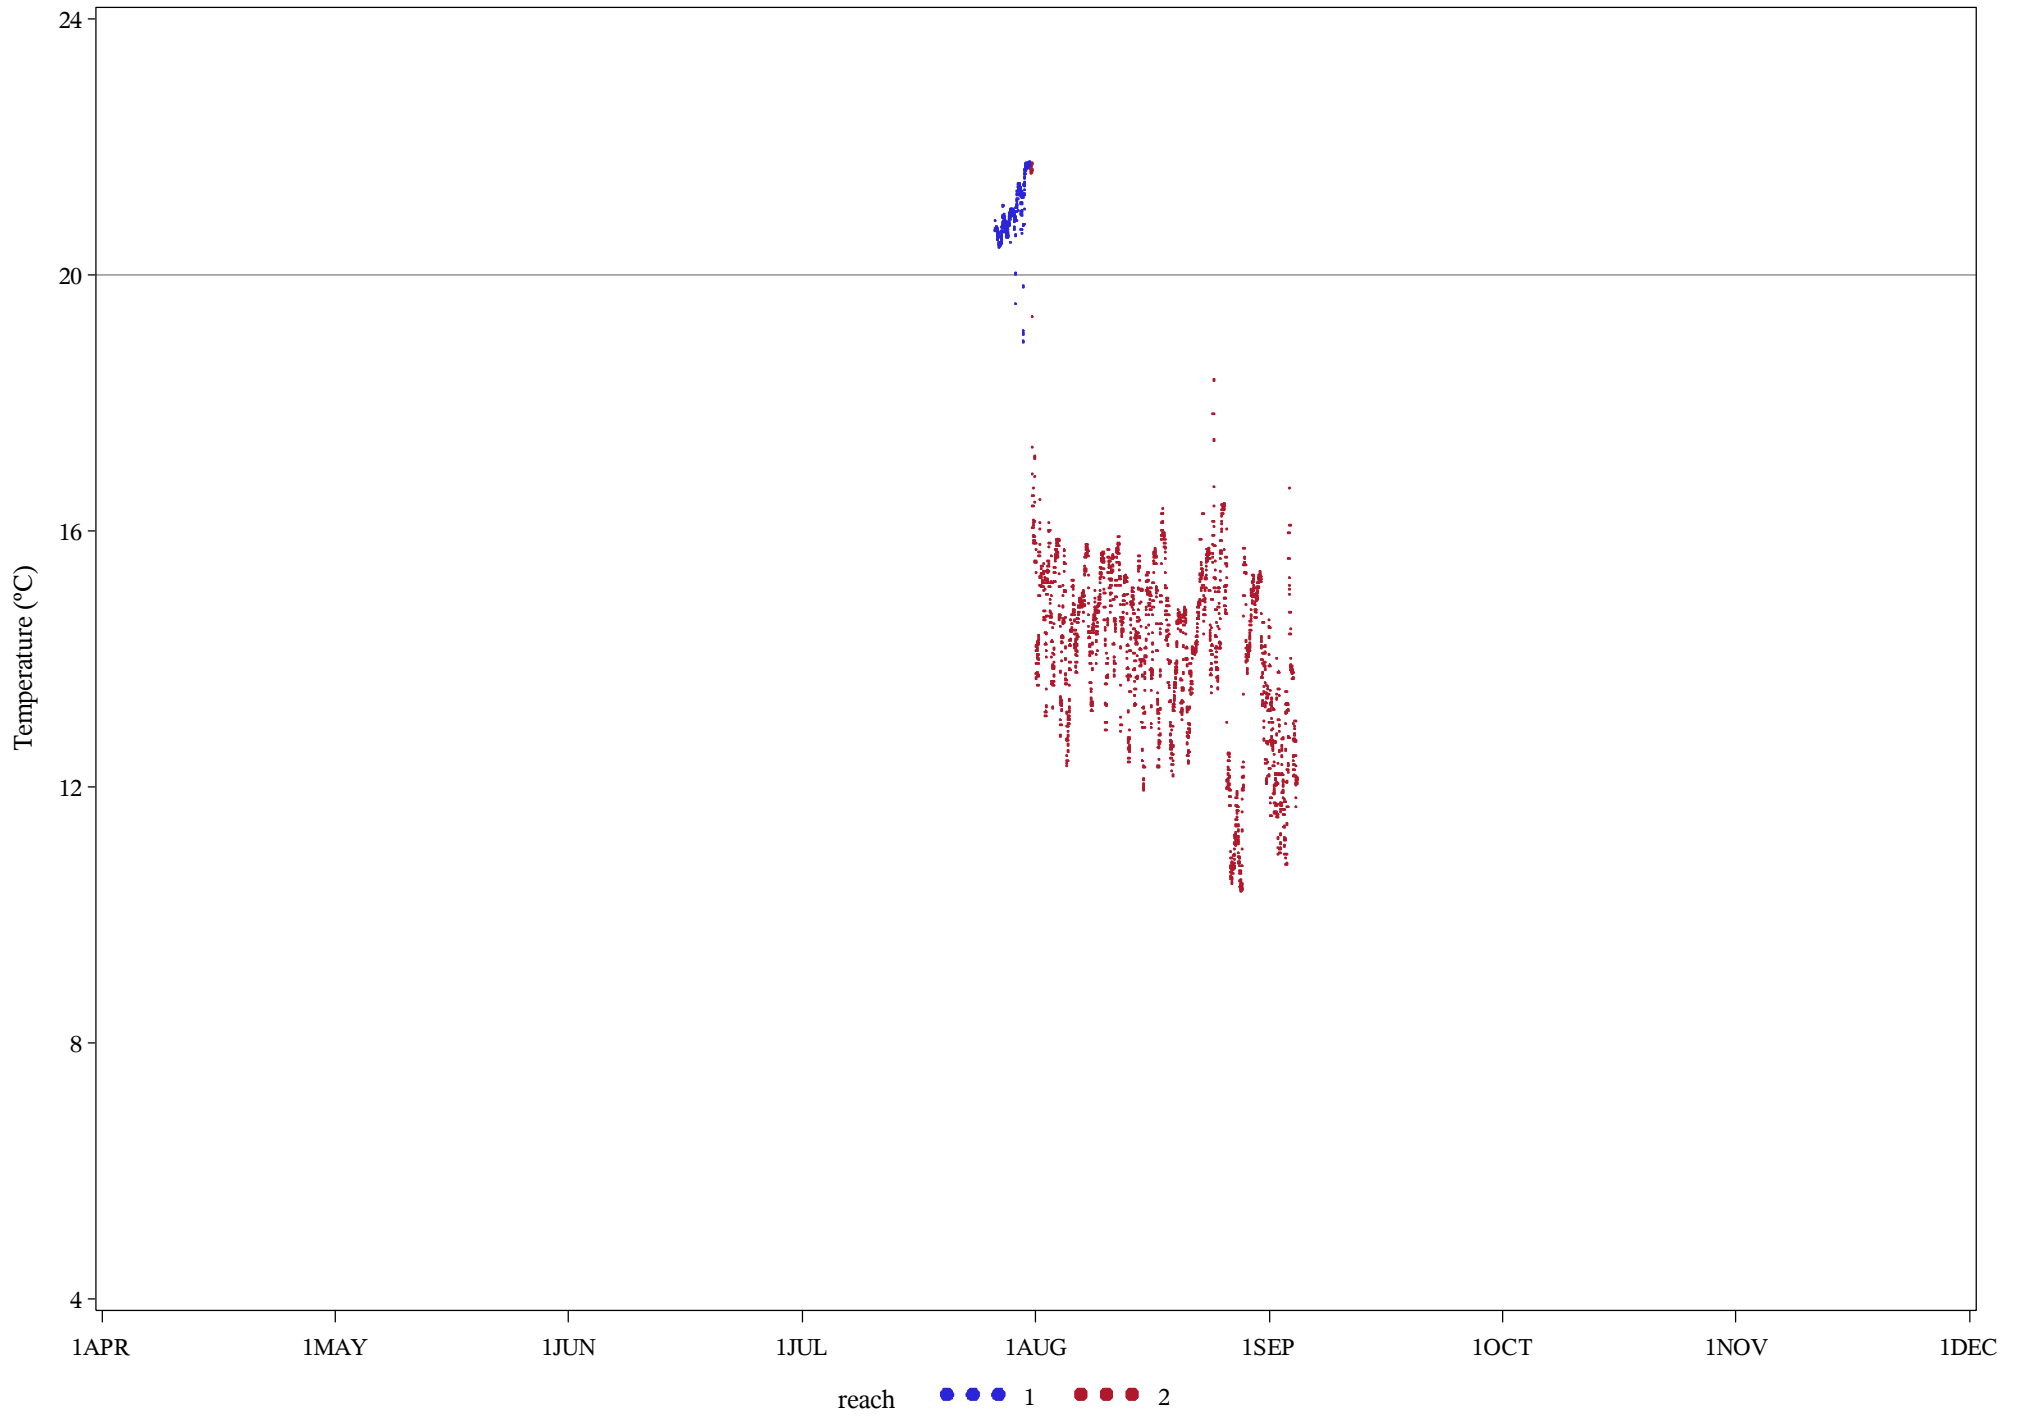

Steelhead  
3870A

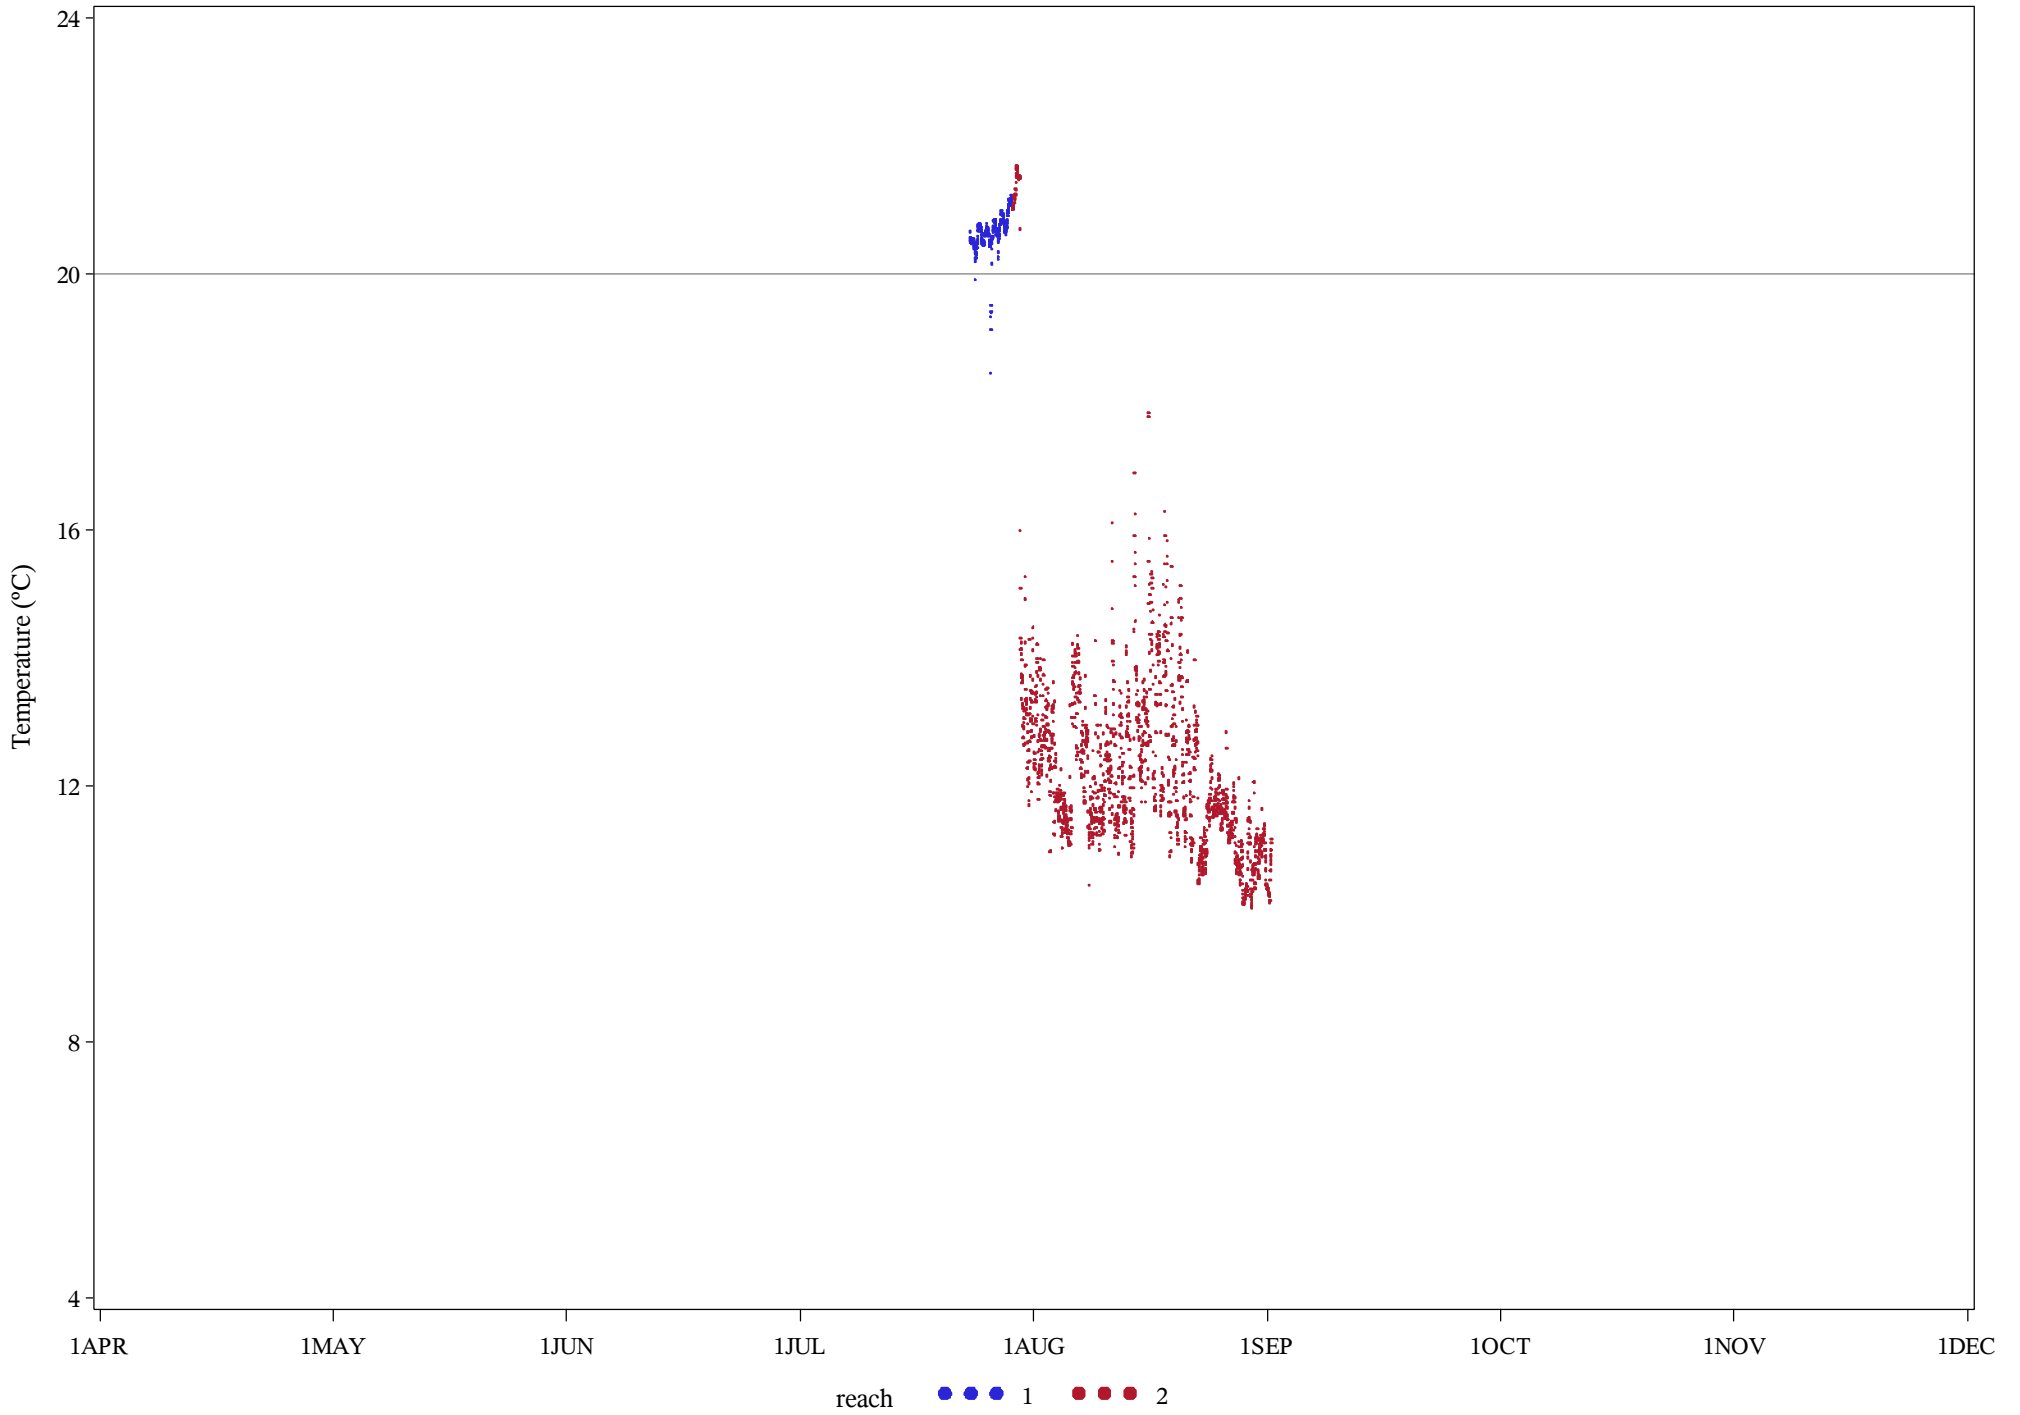

# Summer Chinook 2985A

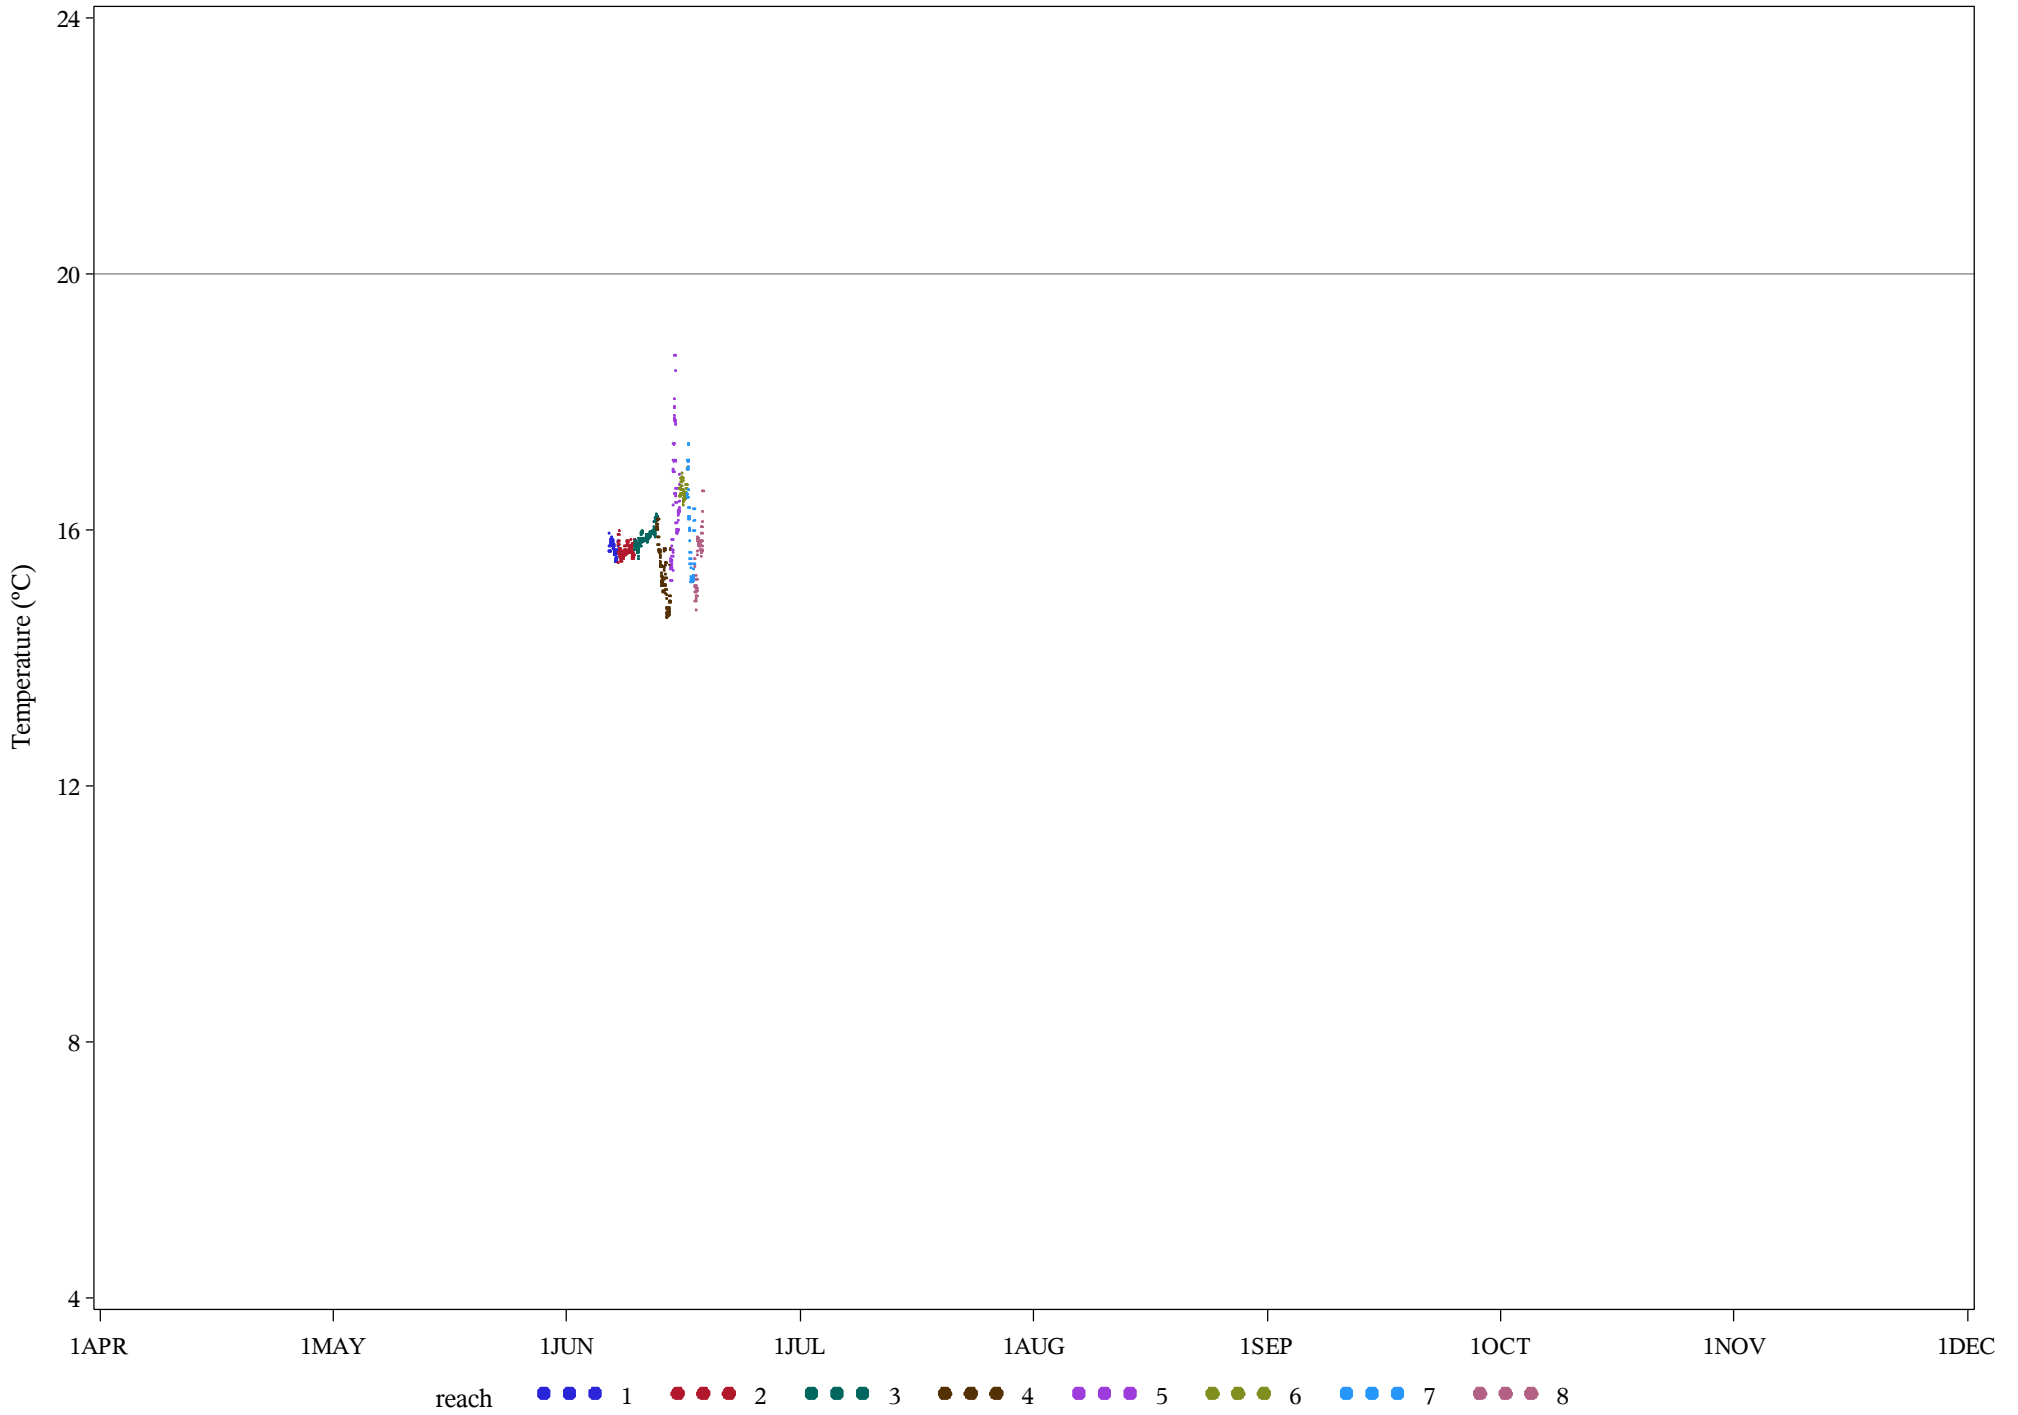

# Summer Chinook 3011A

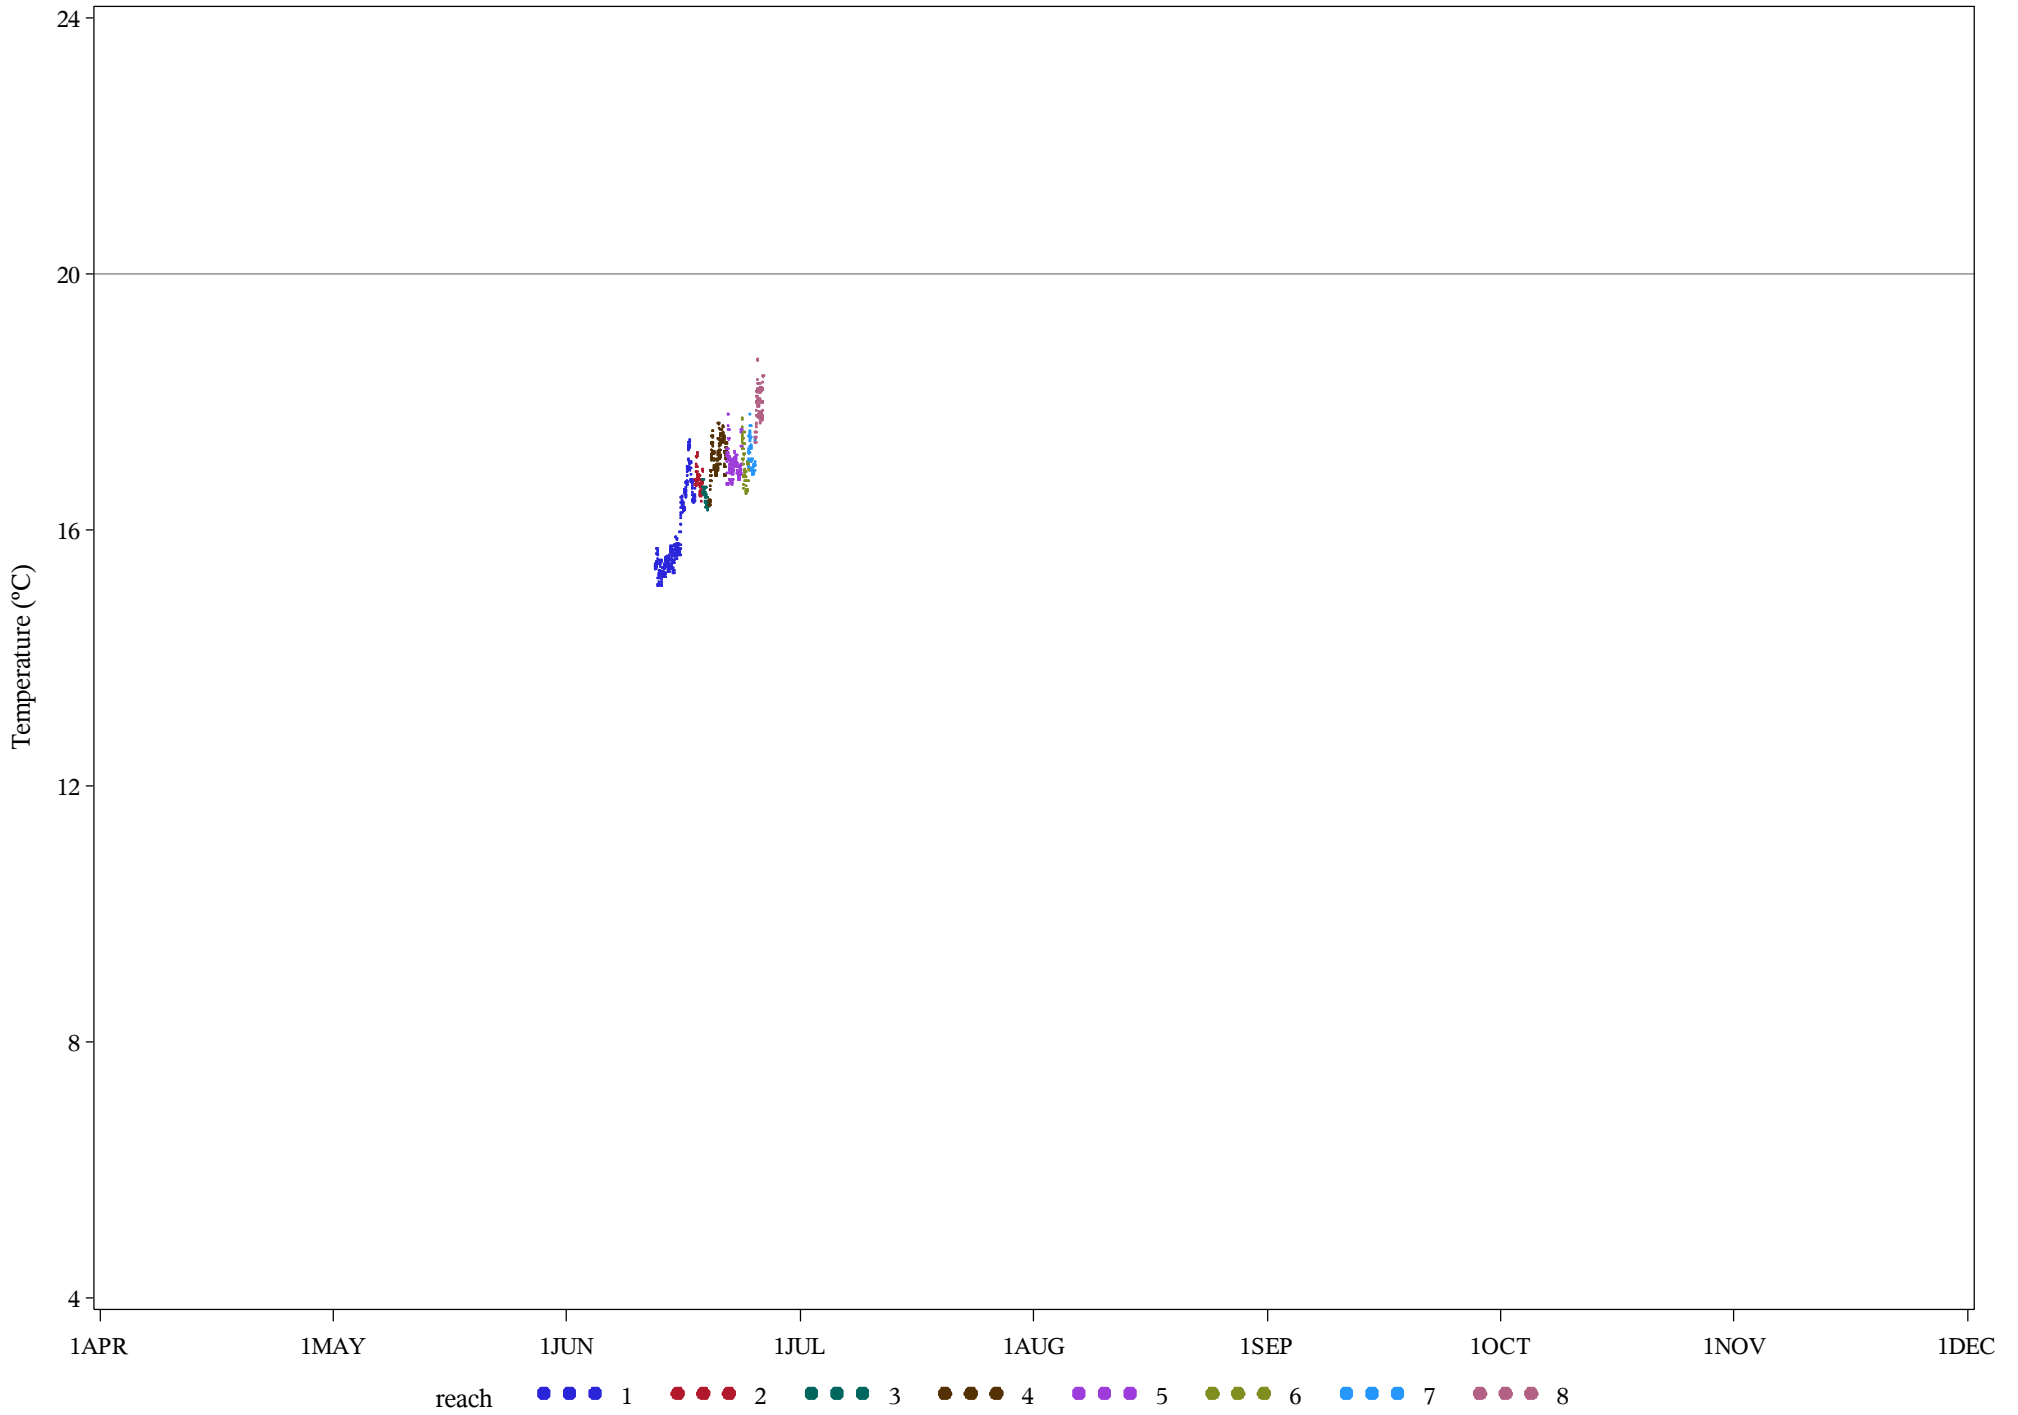

# Summer Chinook 3091A

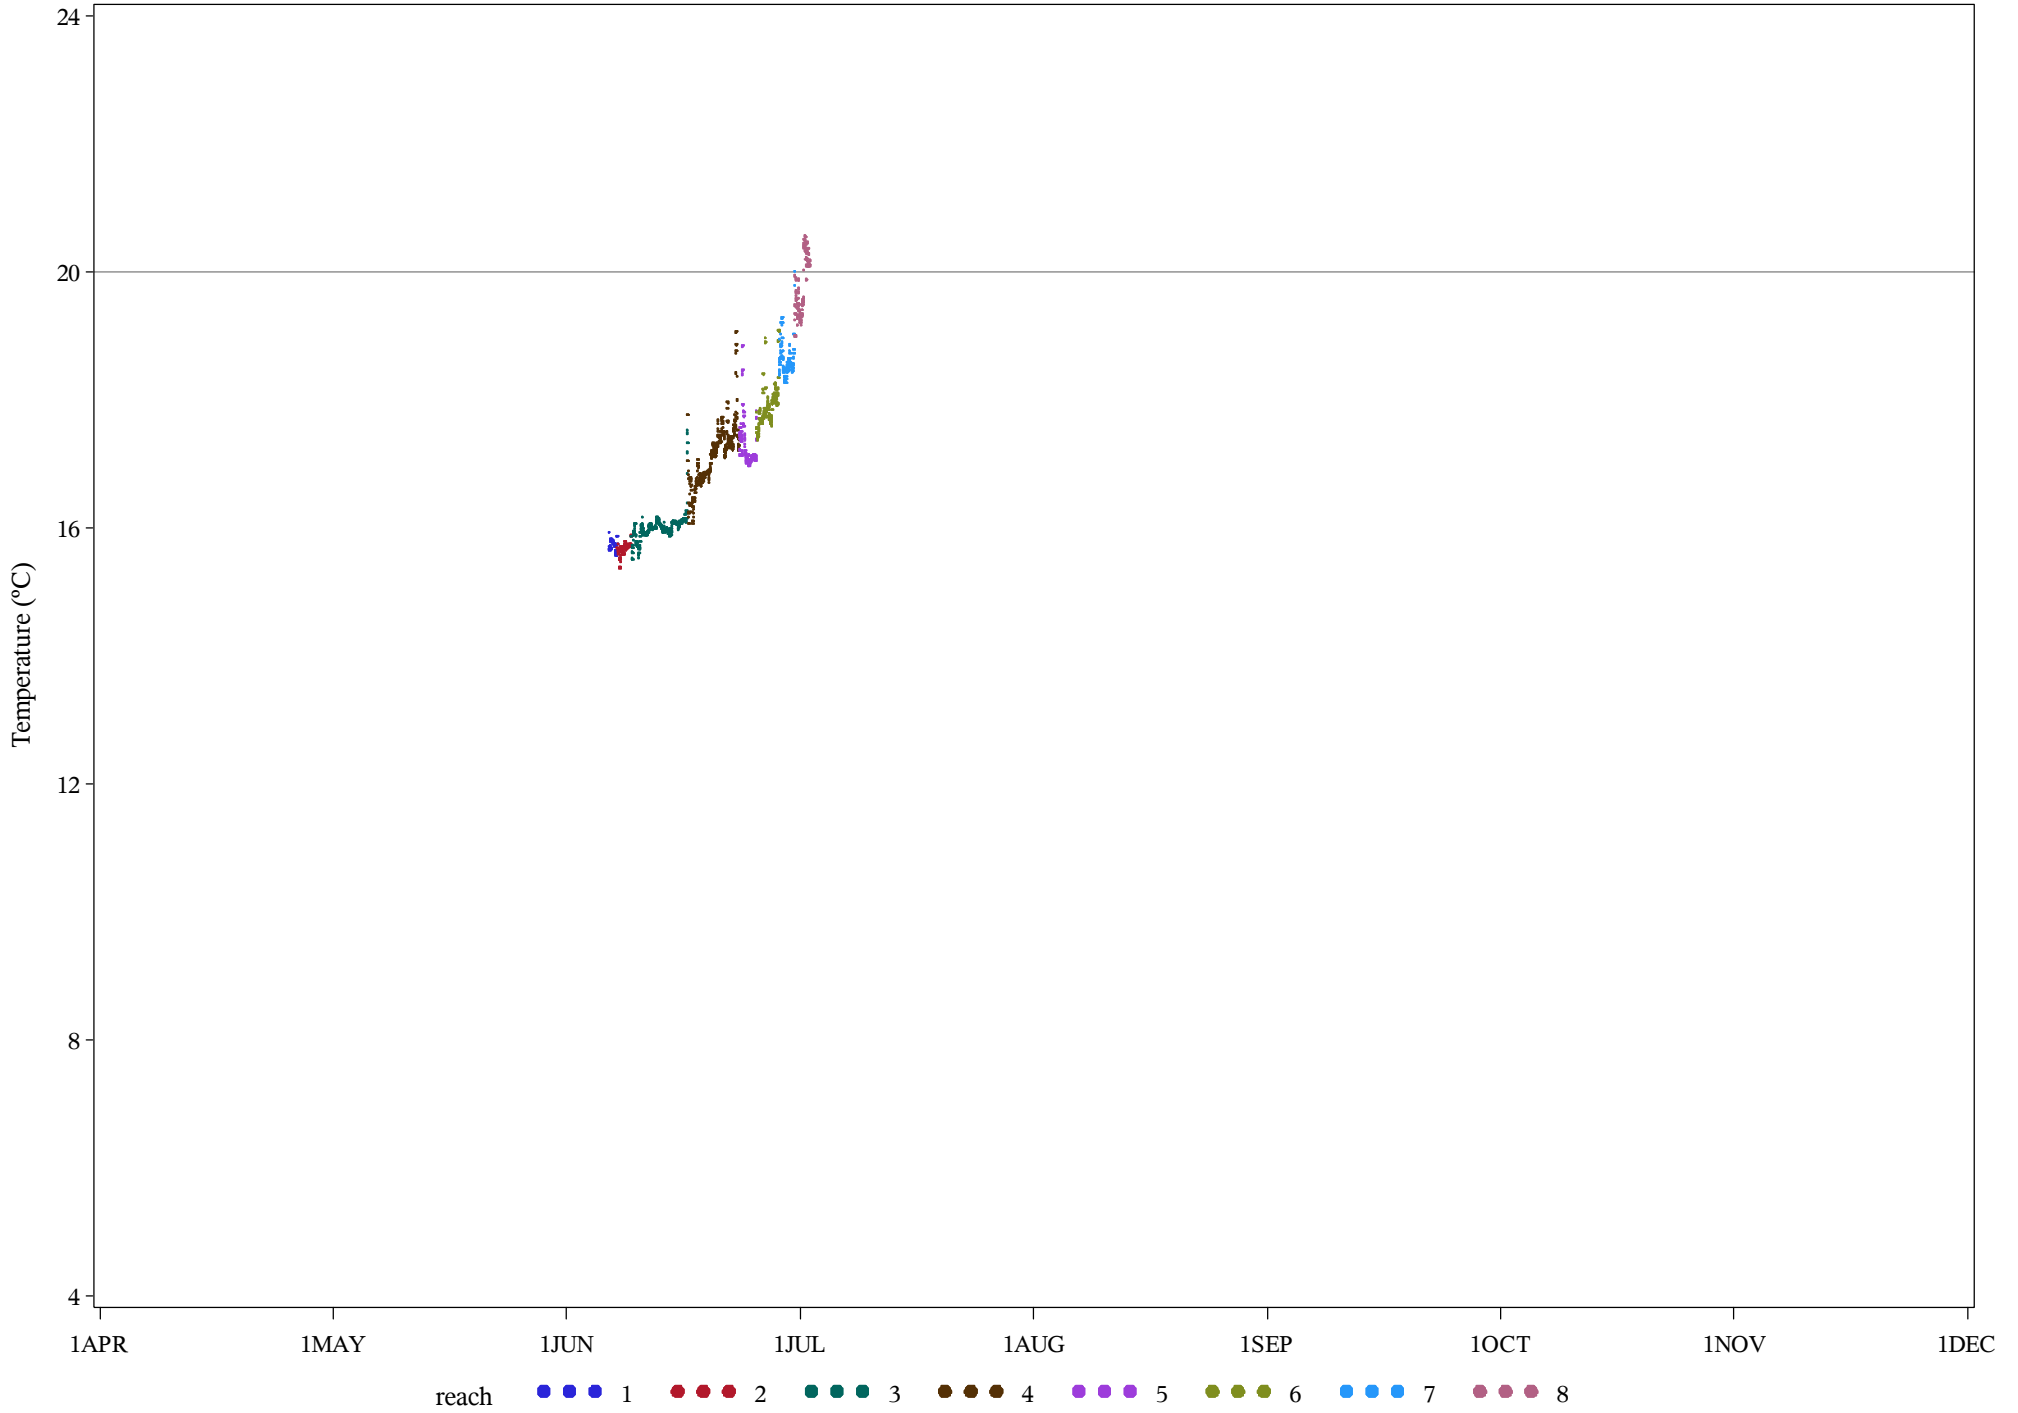



# Summer Chinook 3113A

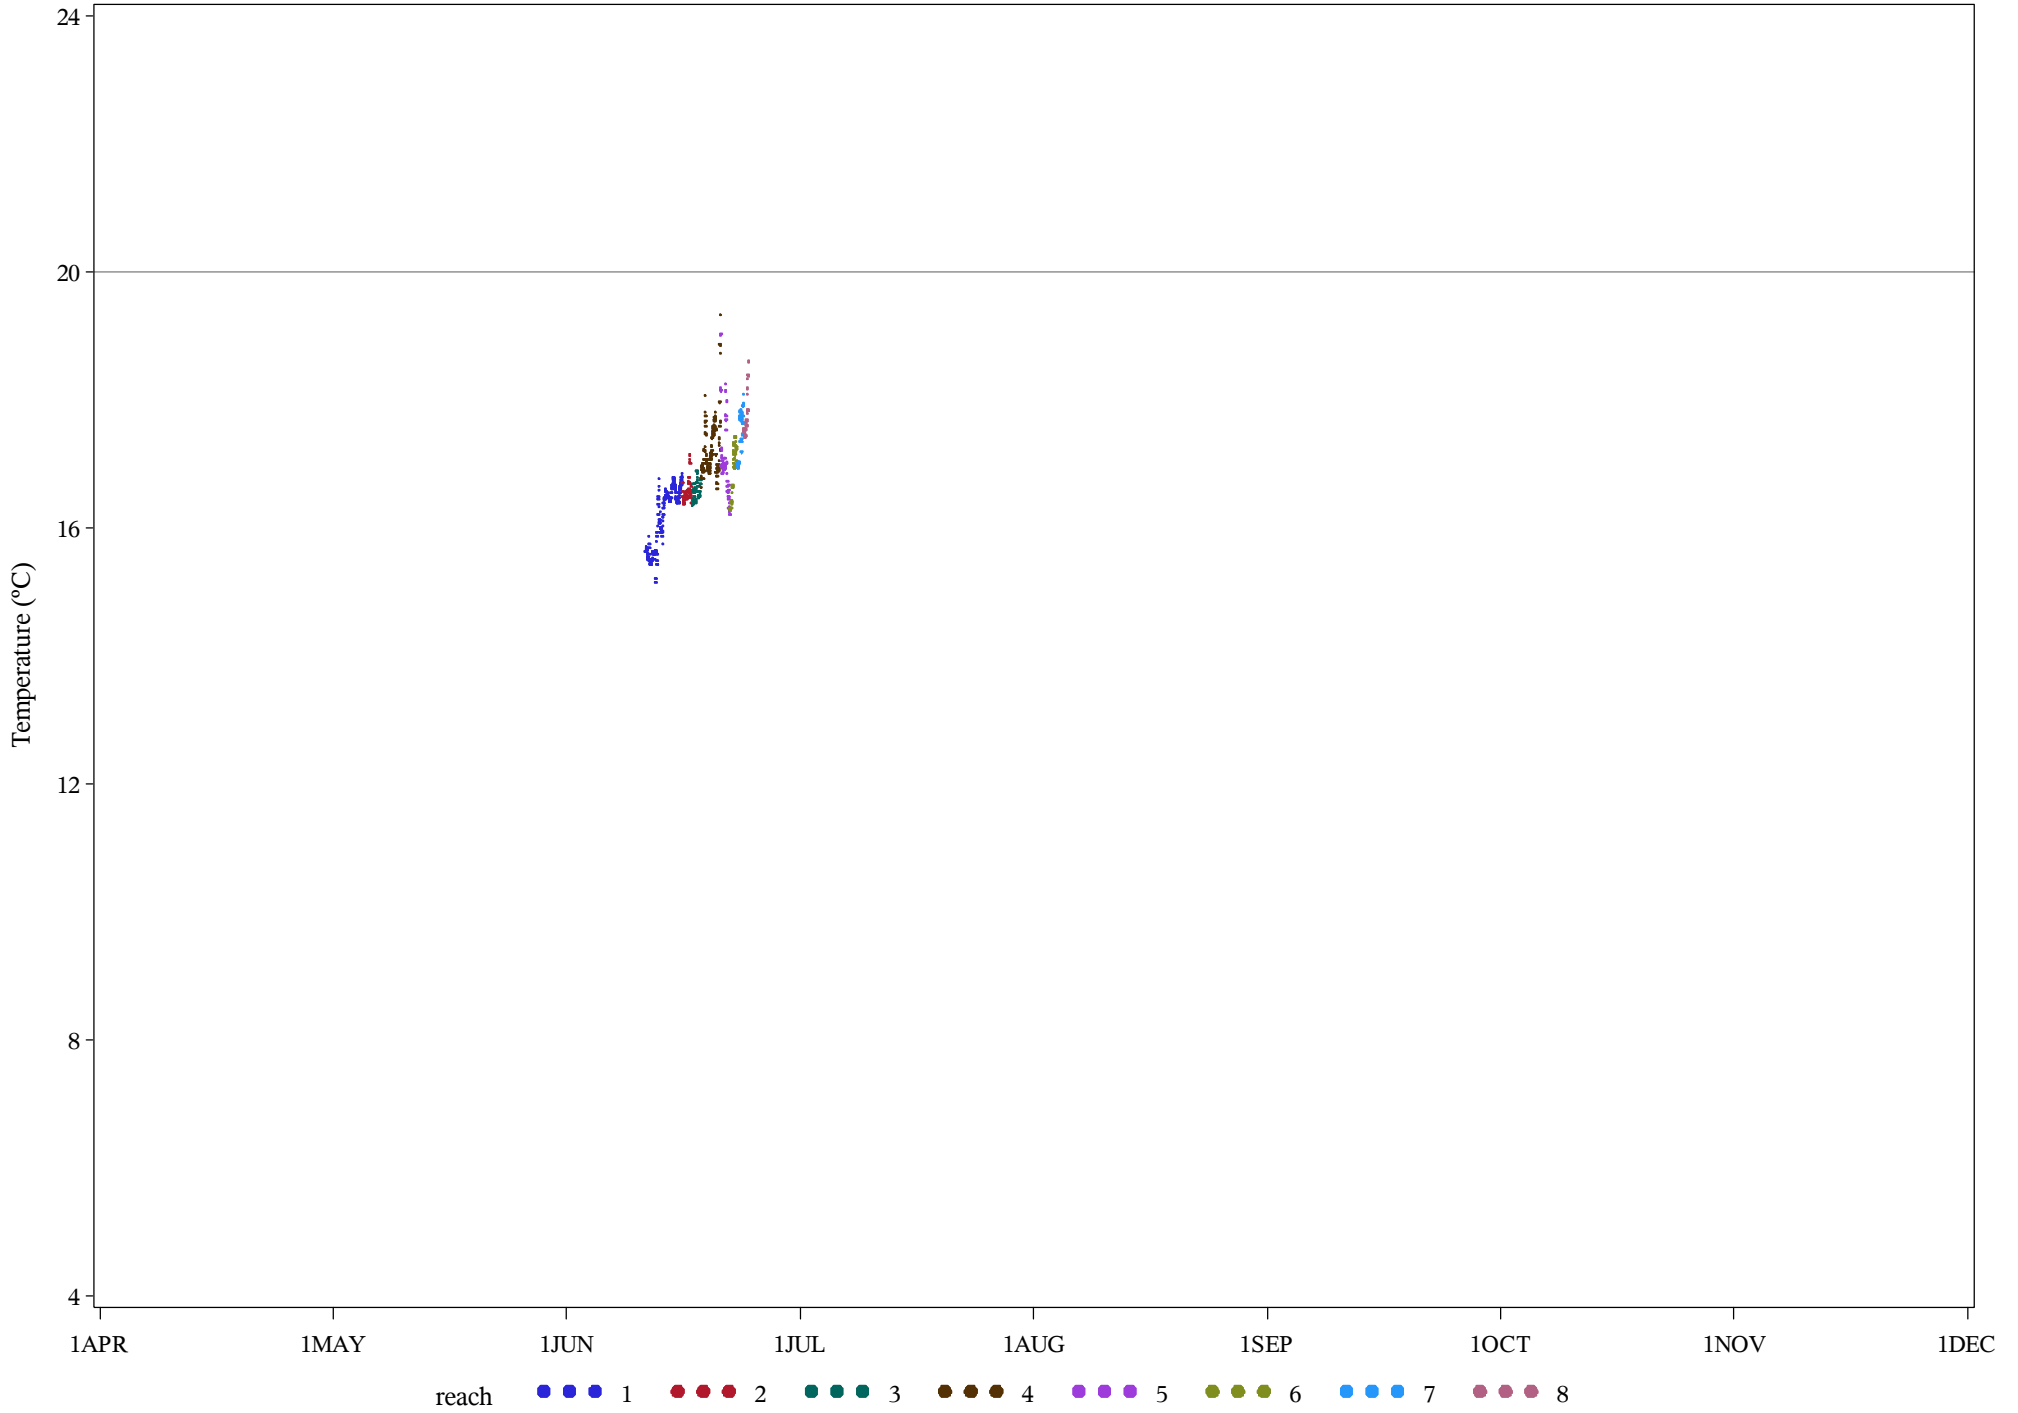

# Summer Chinook 3596A

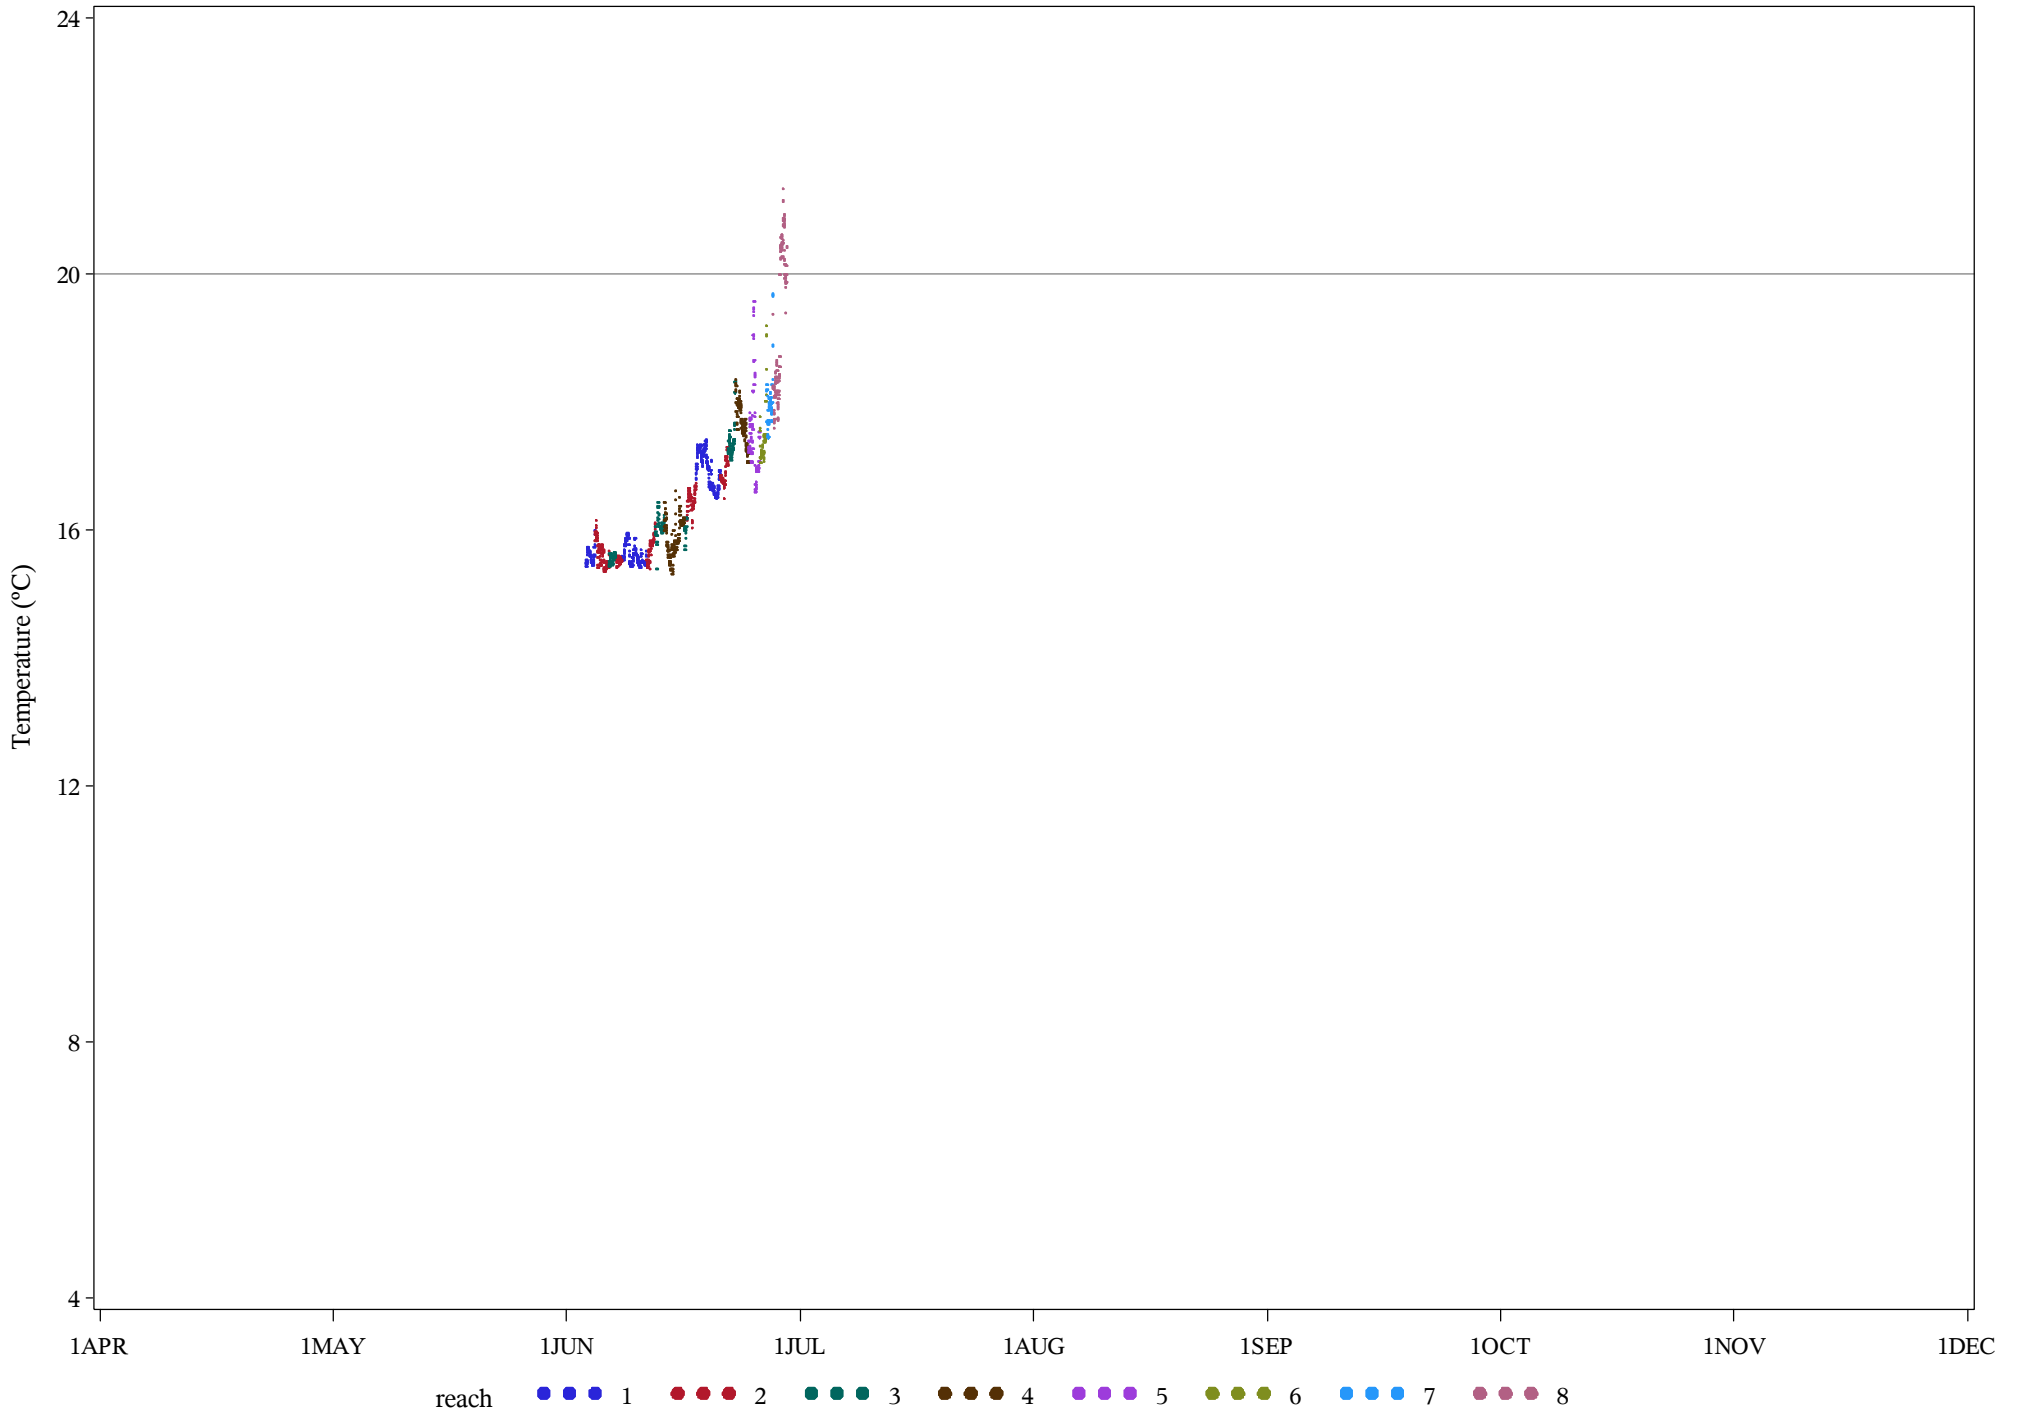

# Summer Chinook 3710A

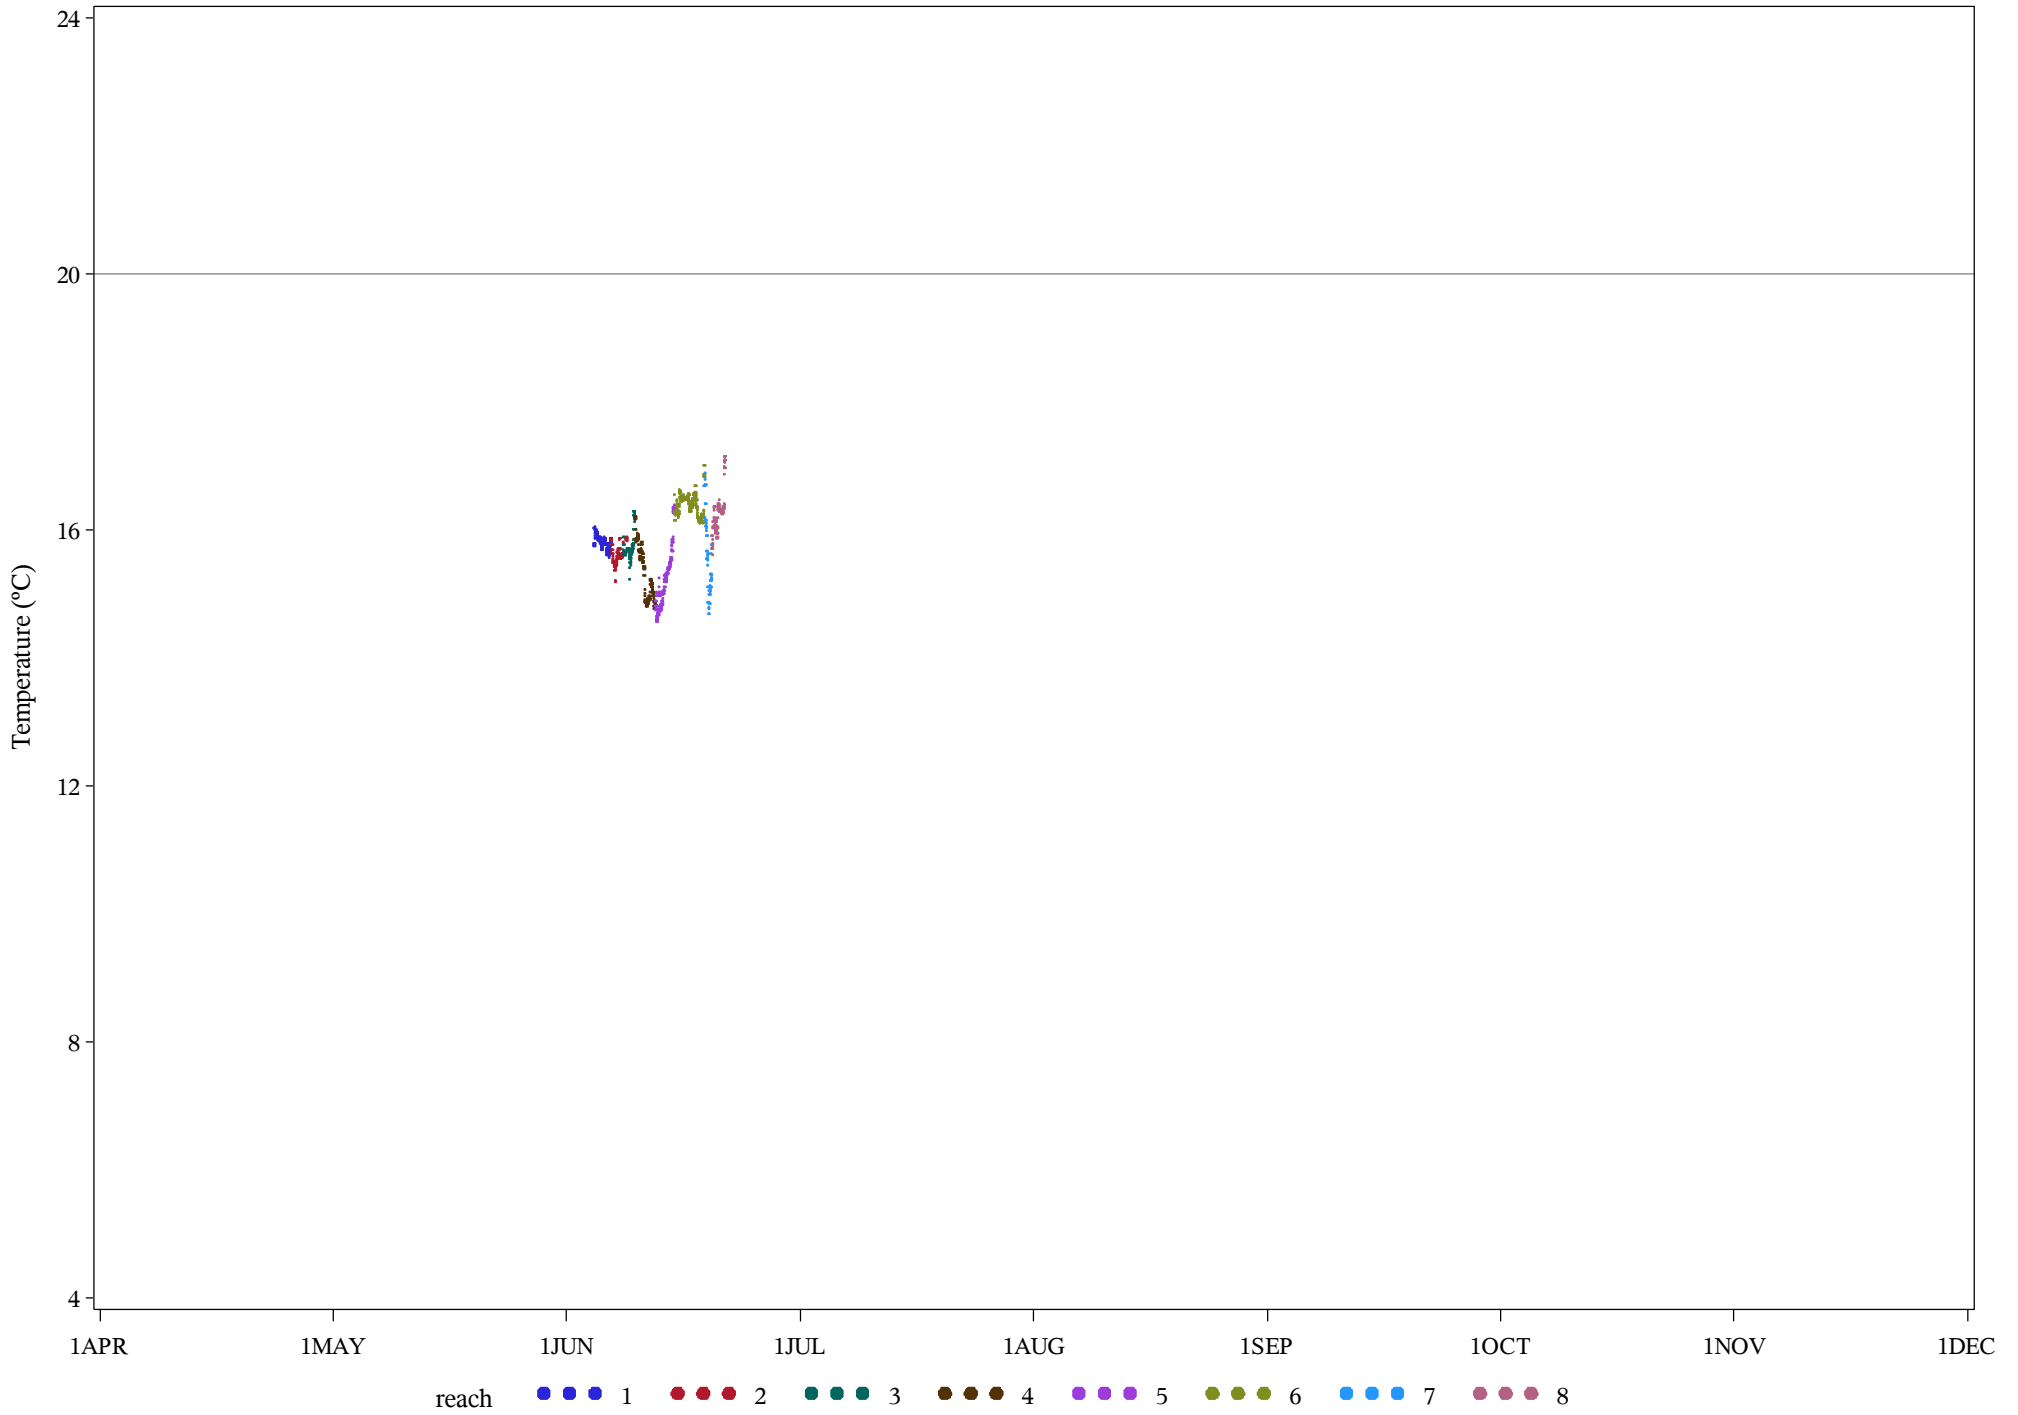

# Summer Chinook 3714A

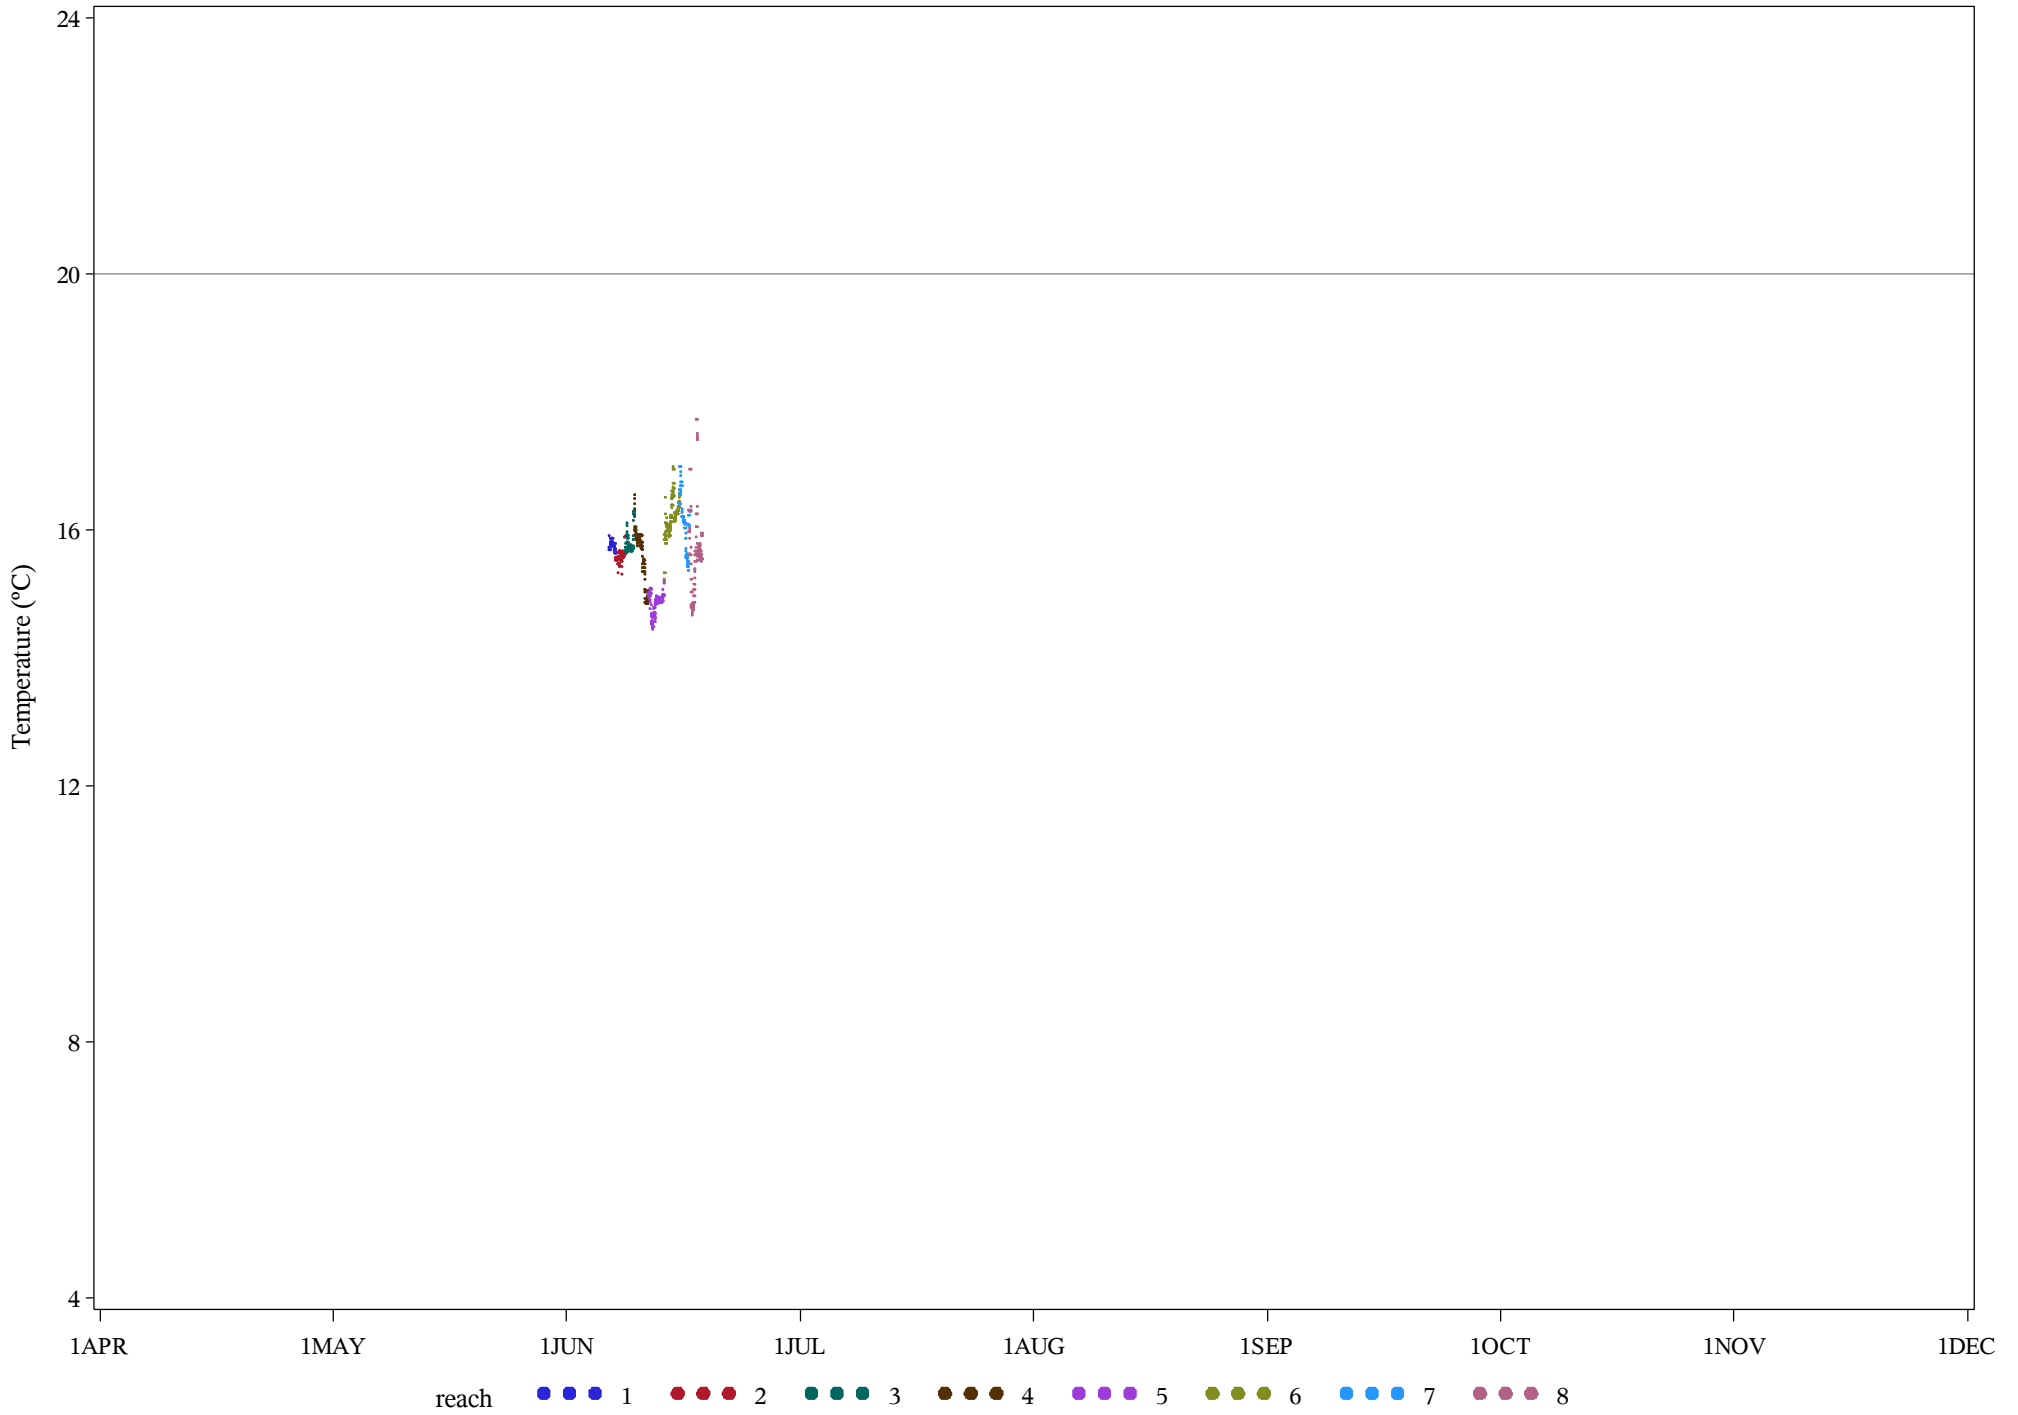

# Summer Chinook 3724A

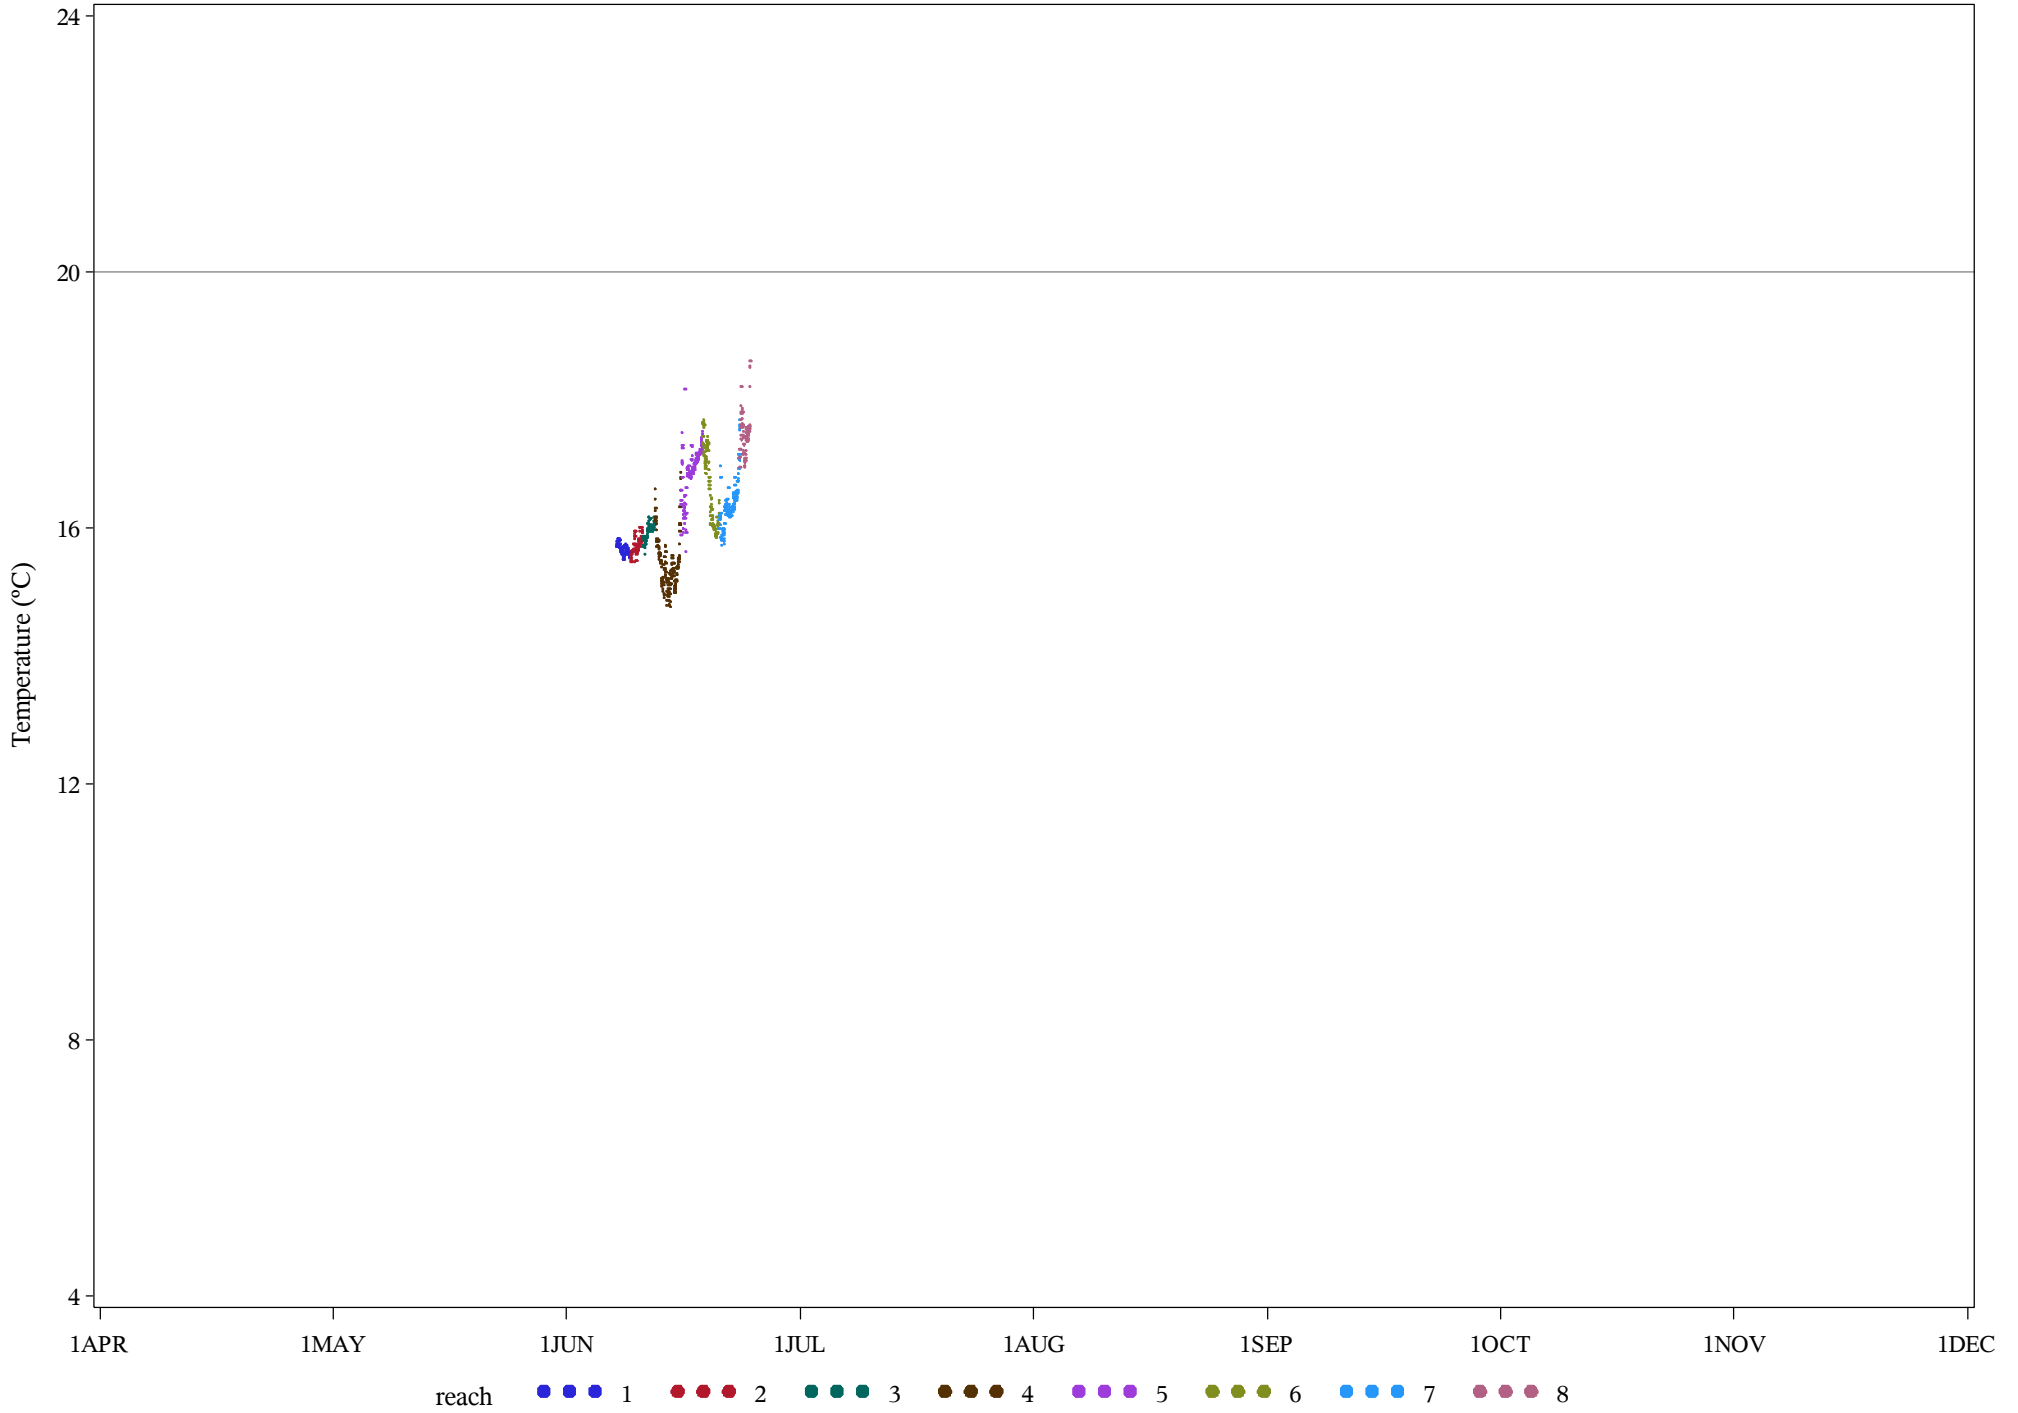

# Summer Chinook 3740A

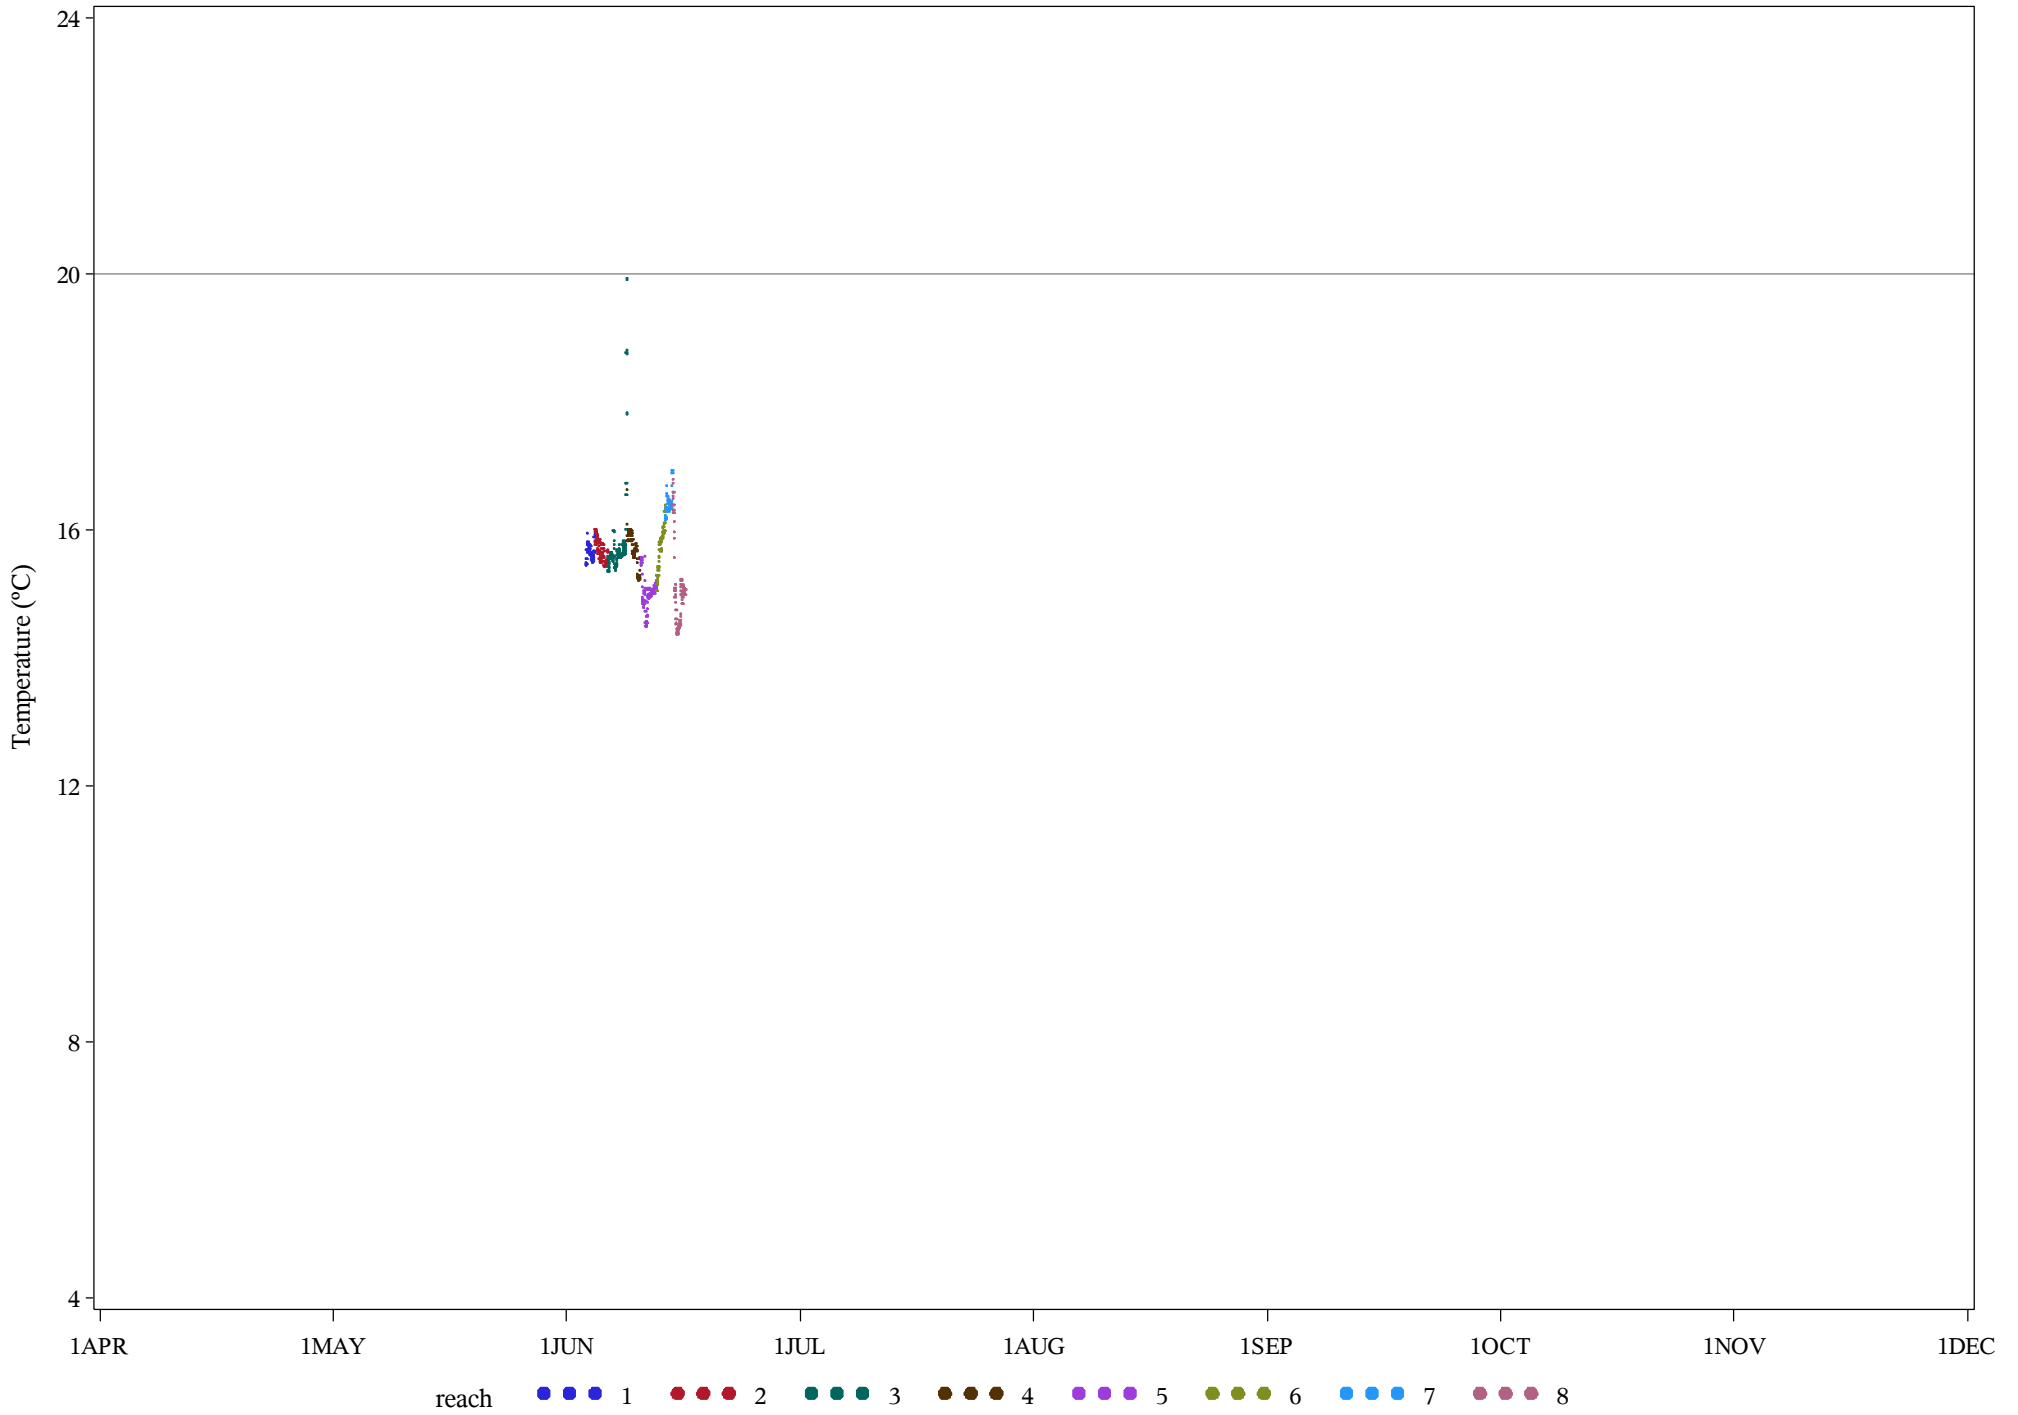

# Summer Chinook 3742A

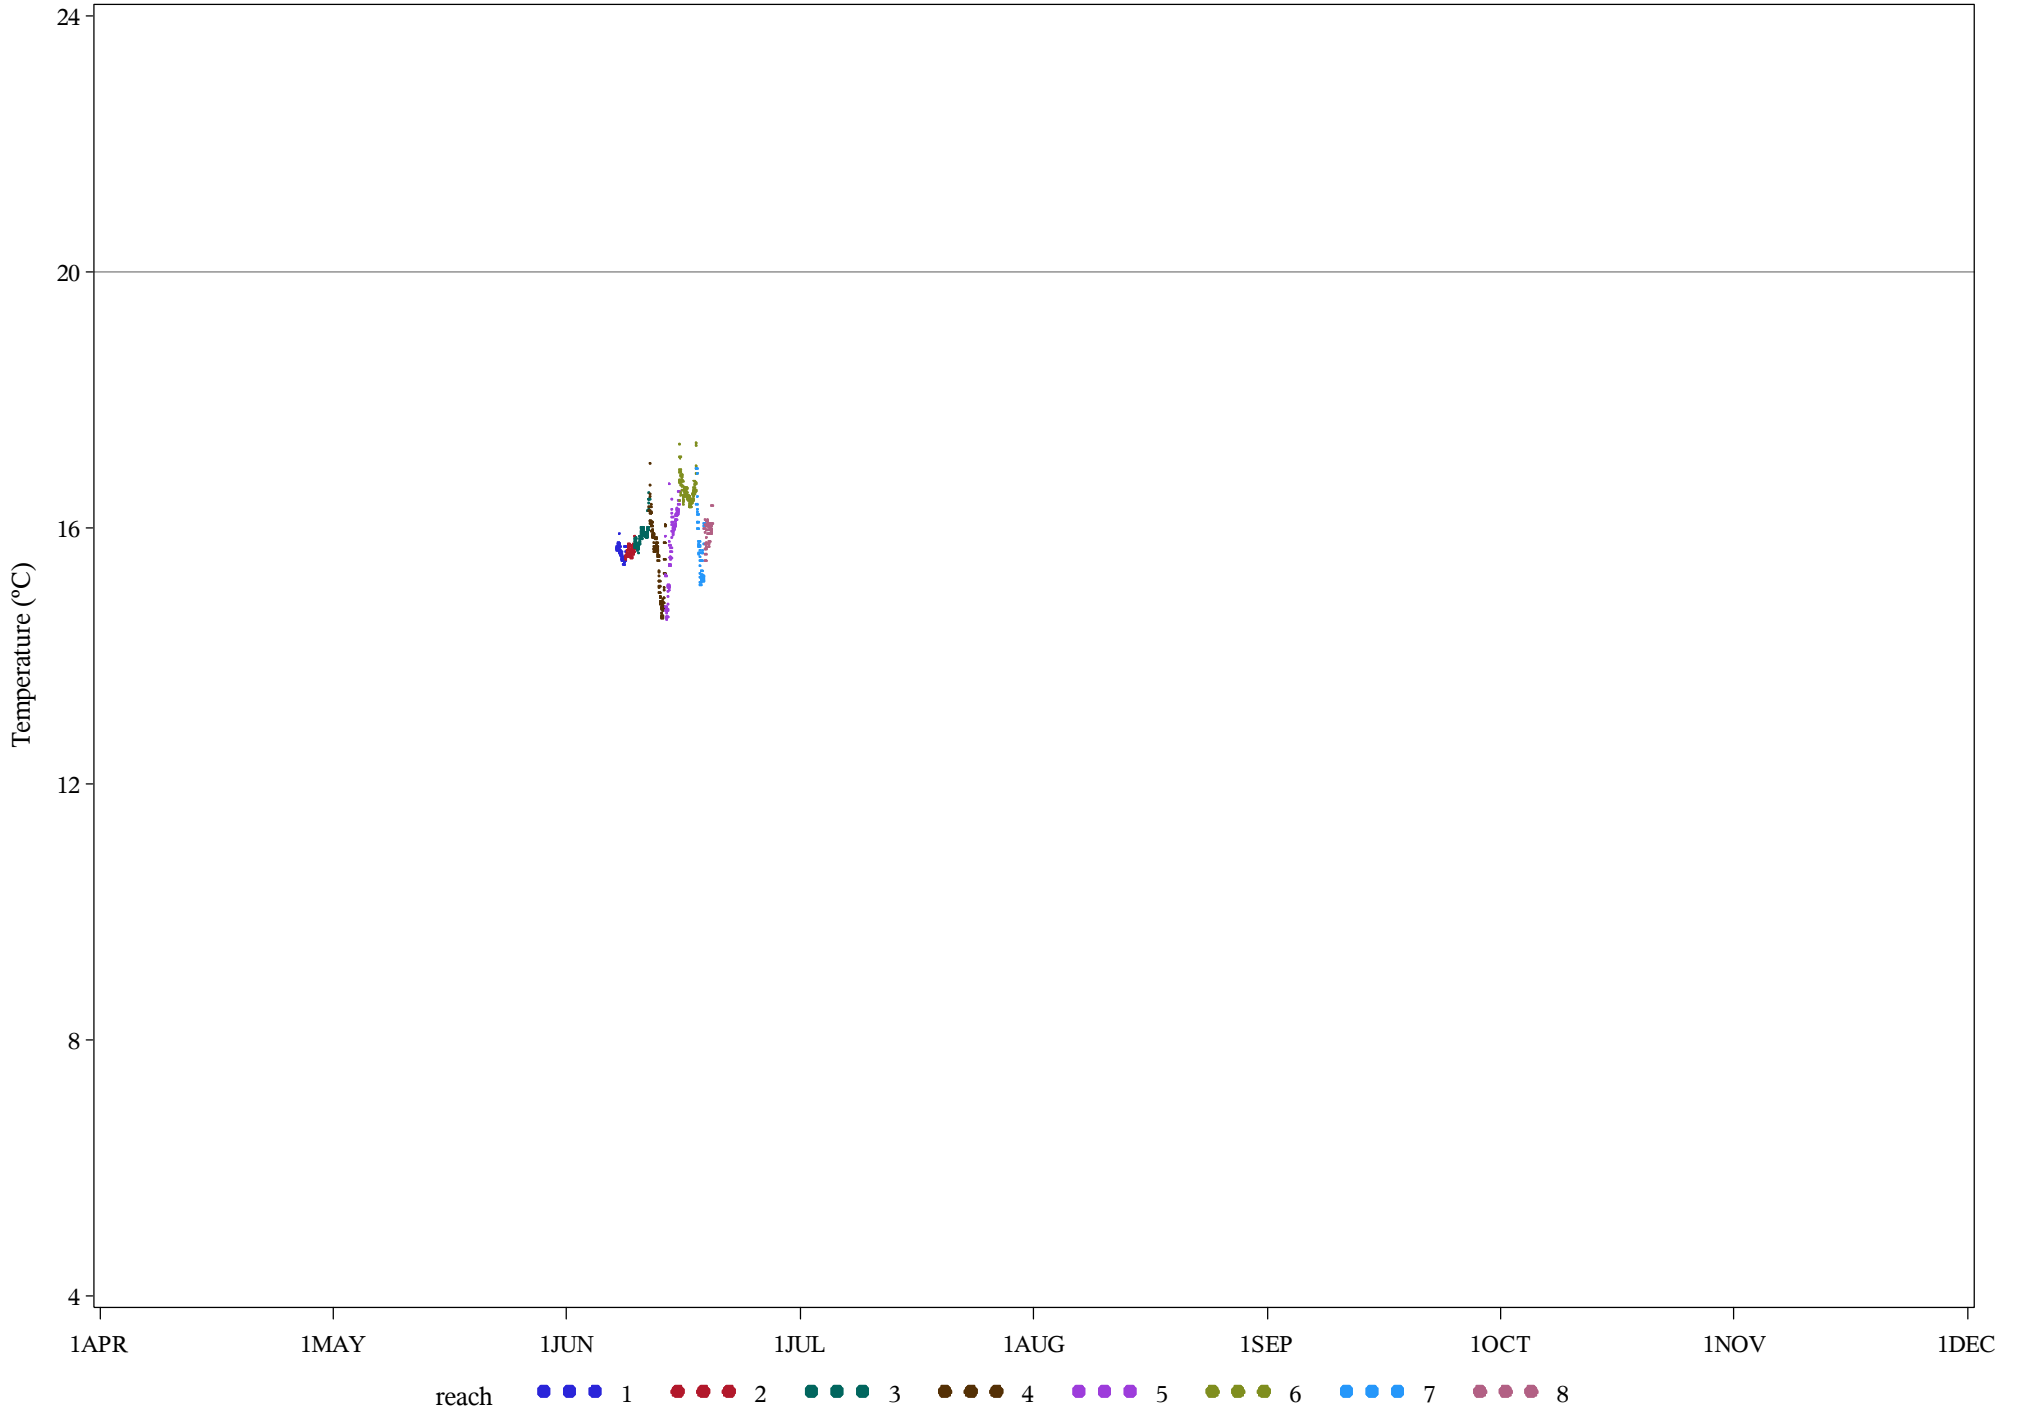





# Summer Chinook 3773A

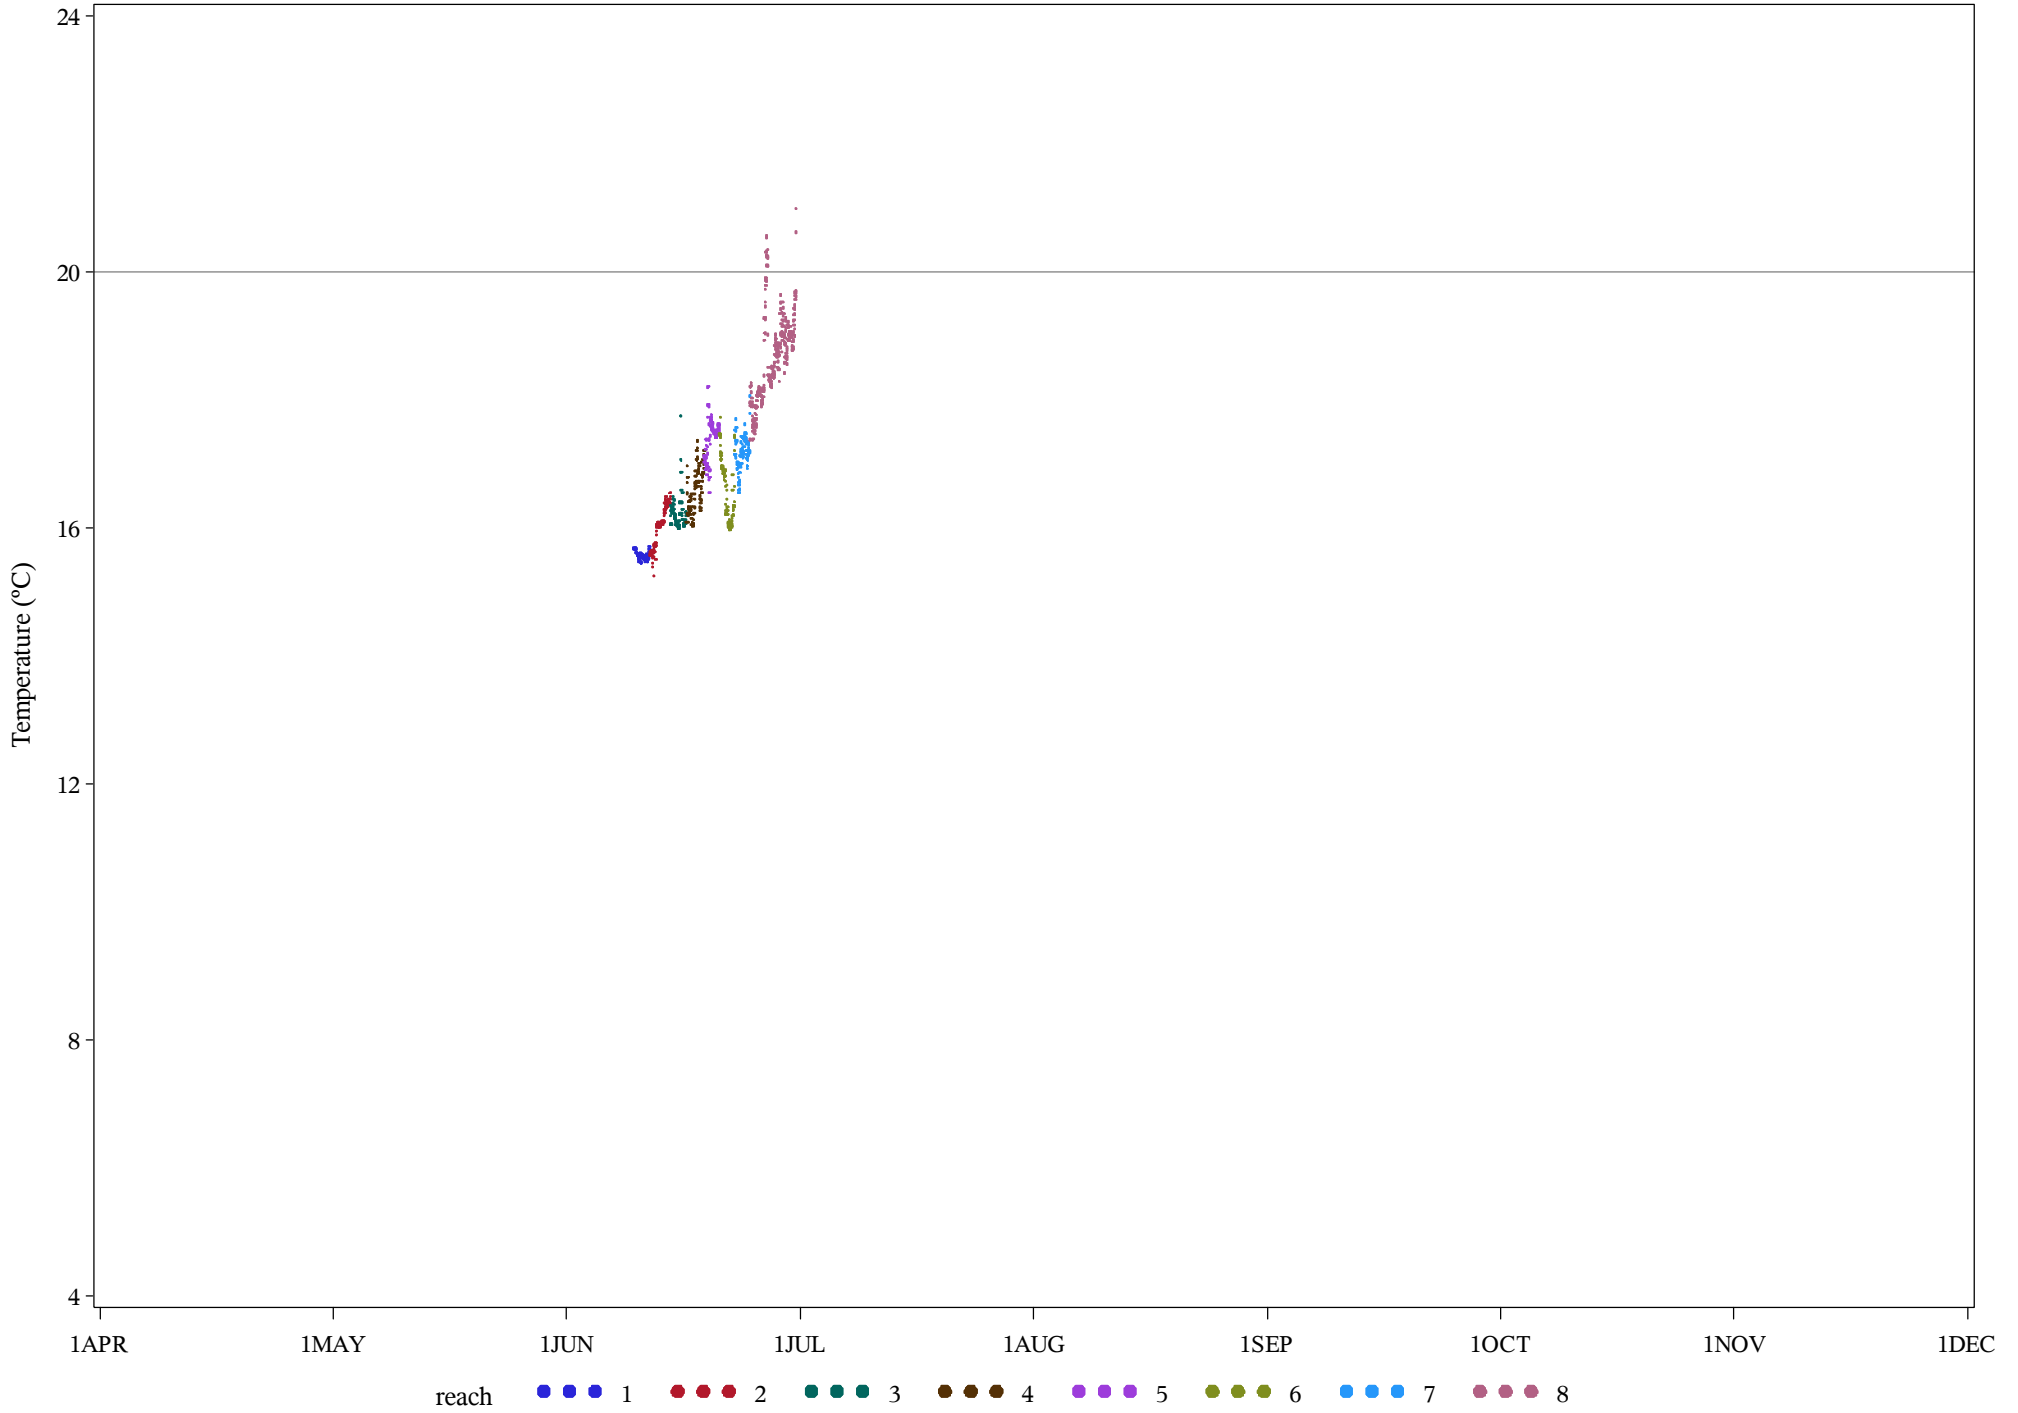

# Summer Chinook 3829A

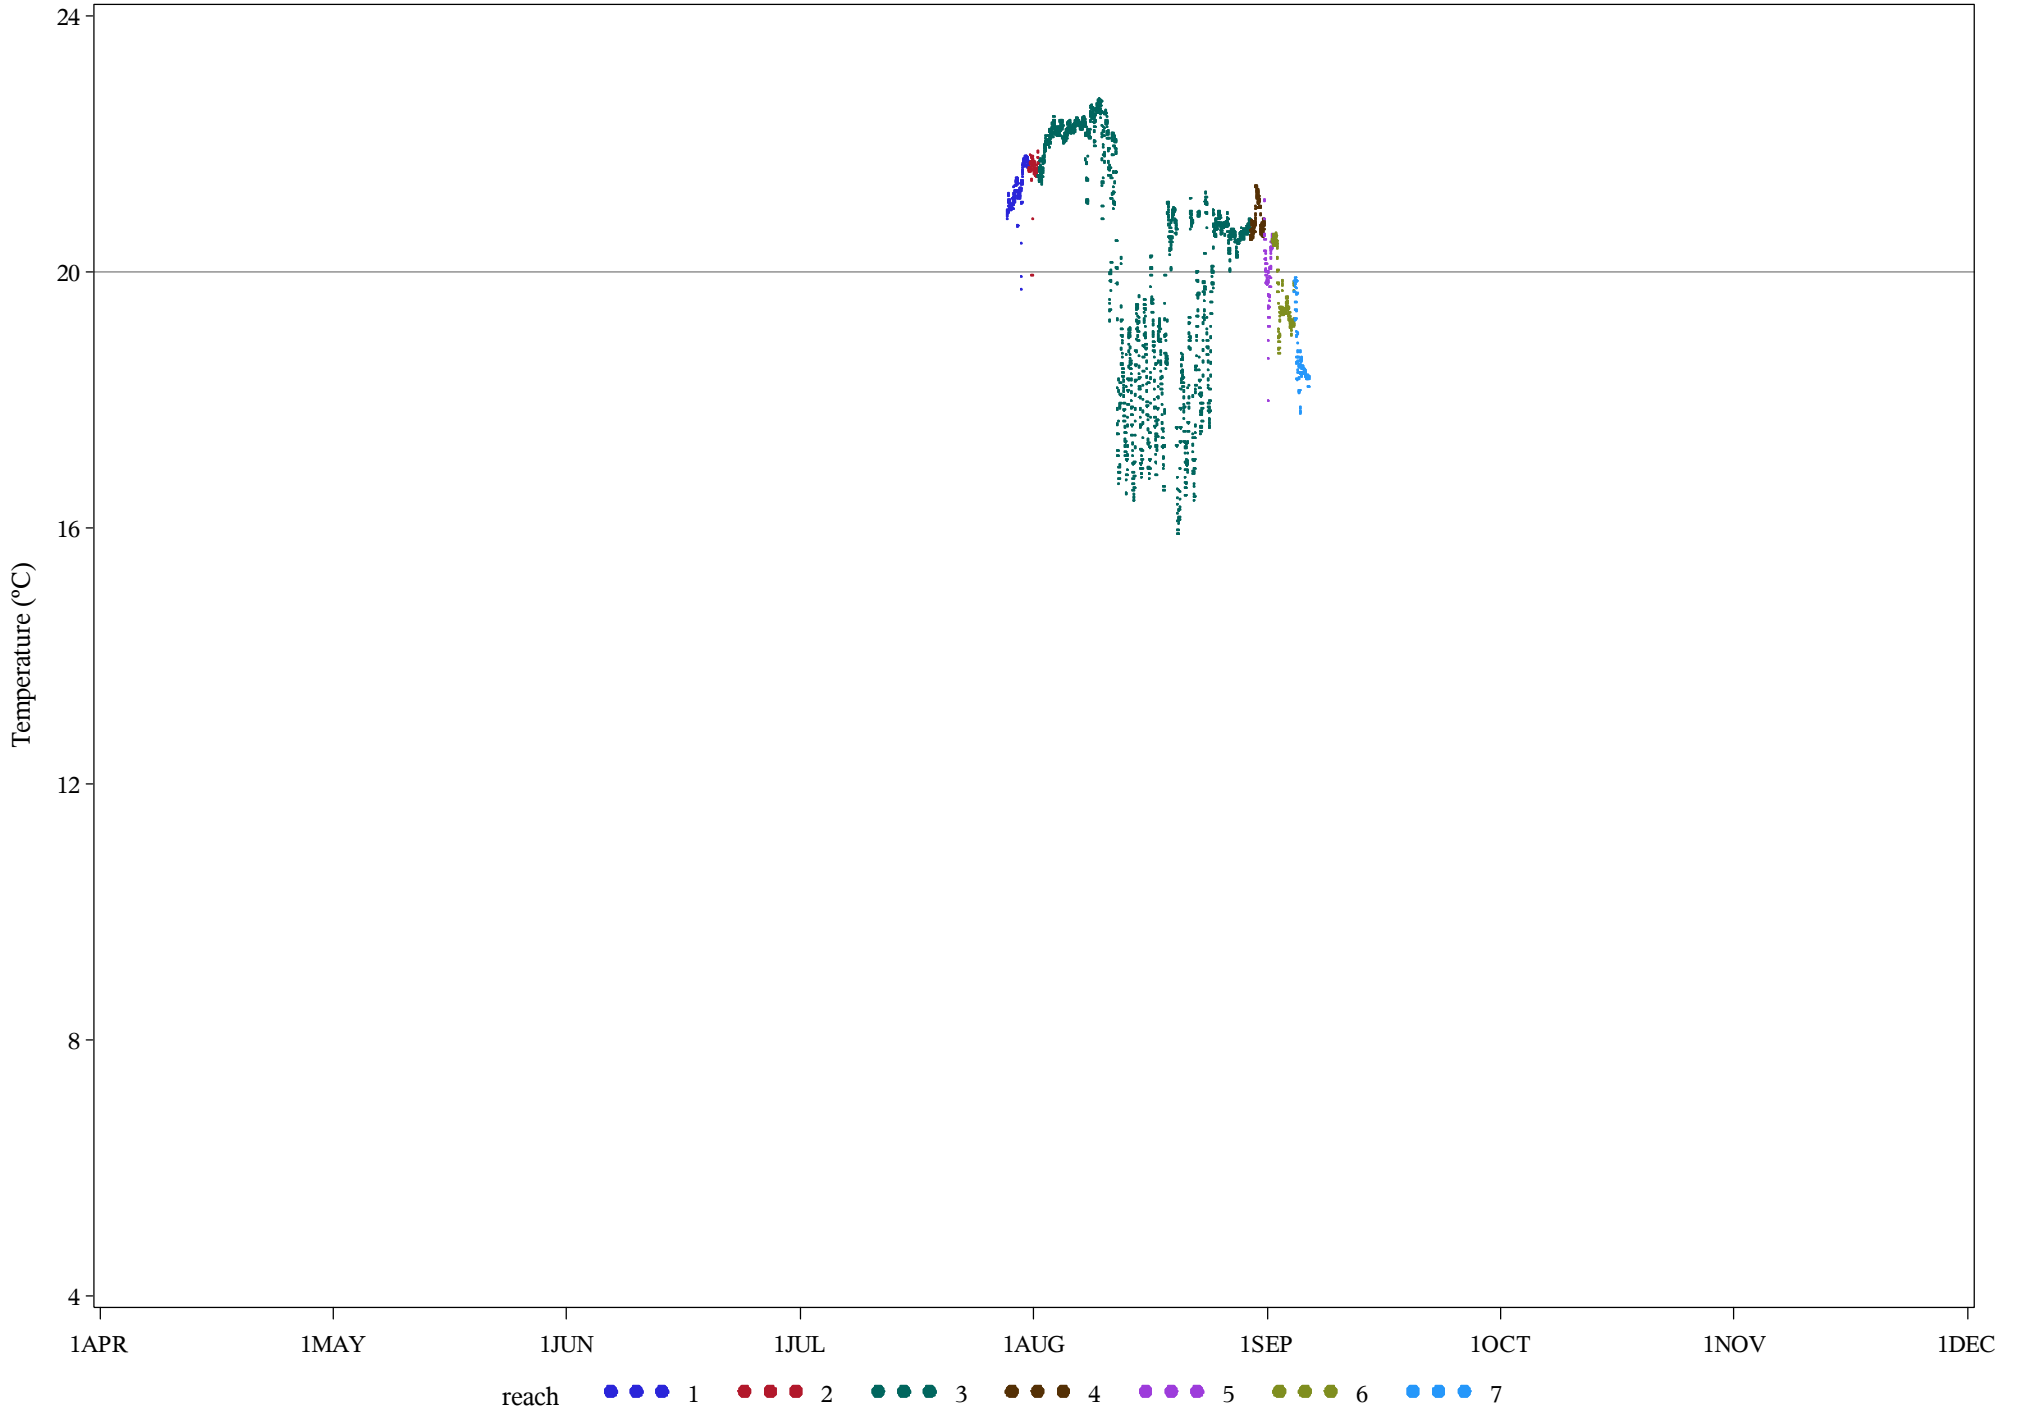

Supplement: pone.0204274.s001.pdf [file pone.0204274.s001.pdf]
