# Supplementary material for: Thermal exposure of adult Chinook salmon and steelhead: Diverse behavioral strategies in a large and warming river system
Source: PubMed Central journal article supplement (PMC6150539; doi:10.1371/journal.pone.0204274), 2018-09-21

# Fall Chinook 2992B

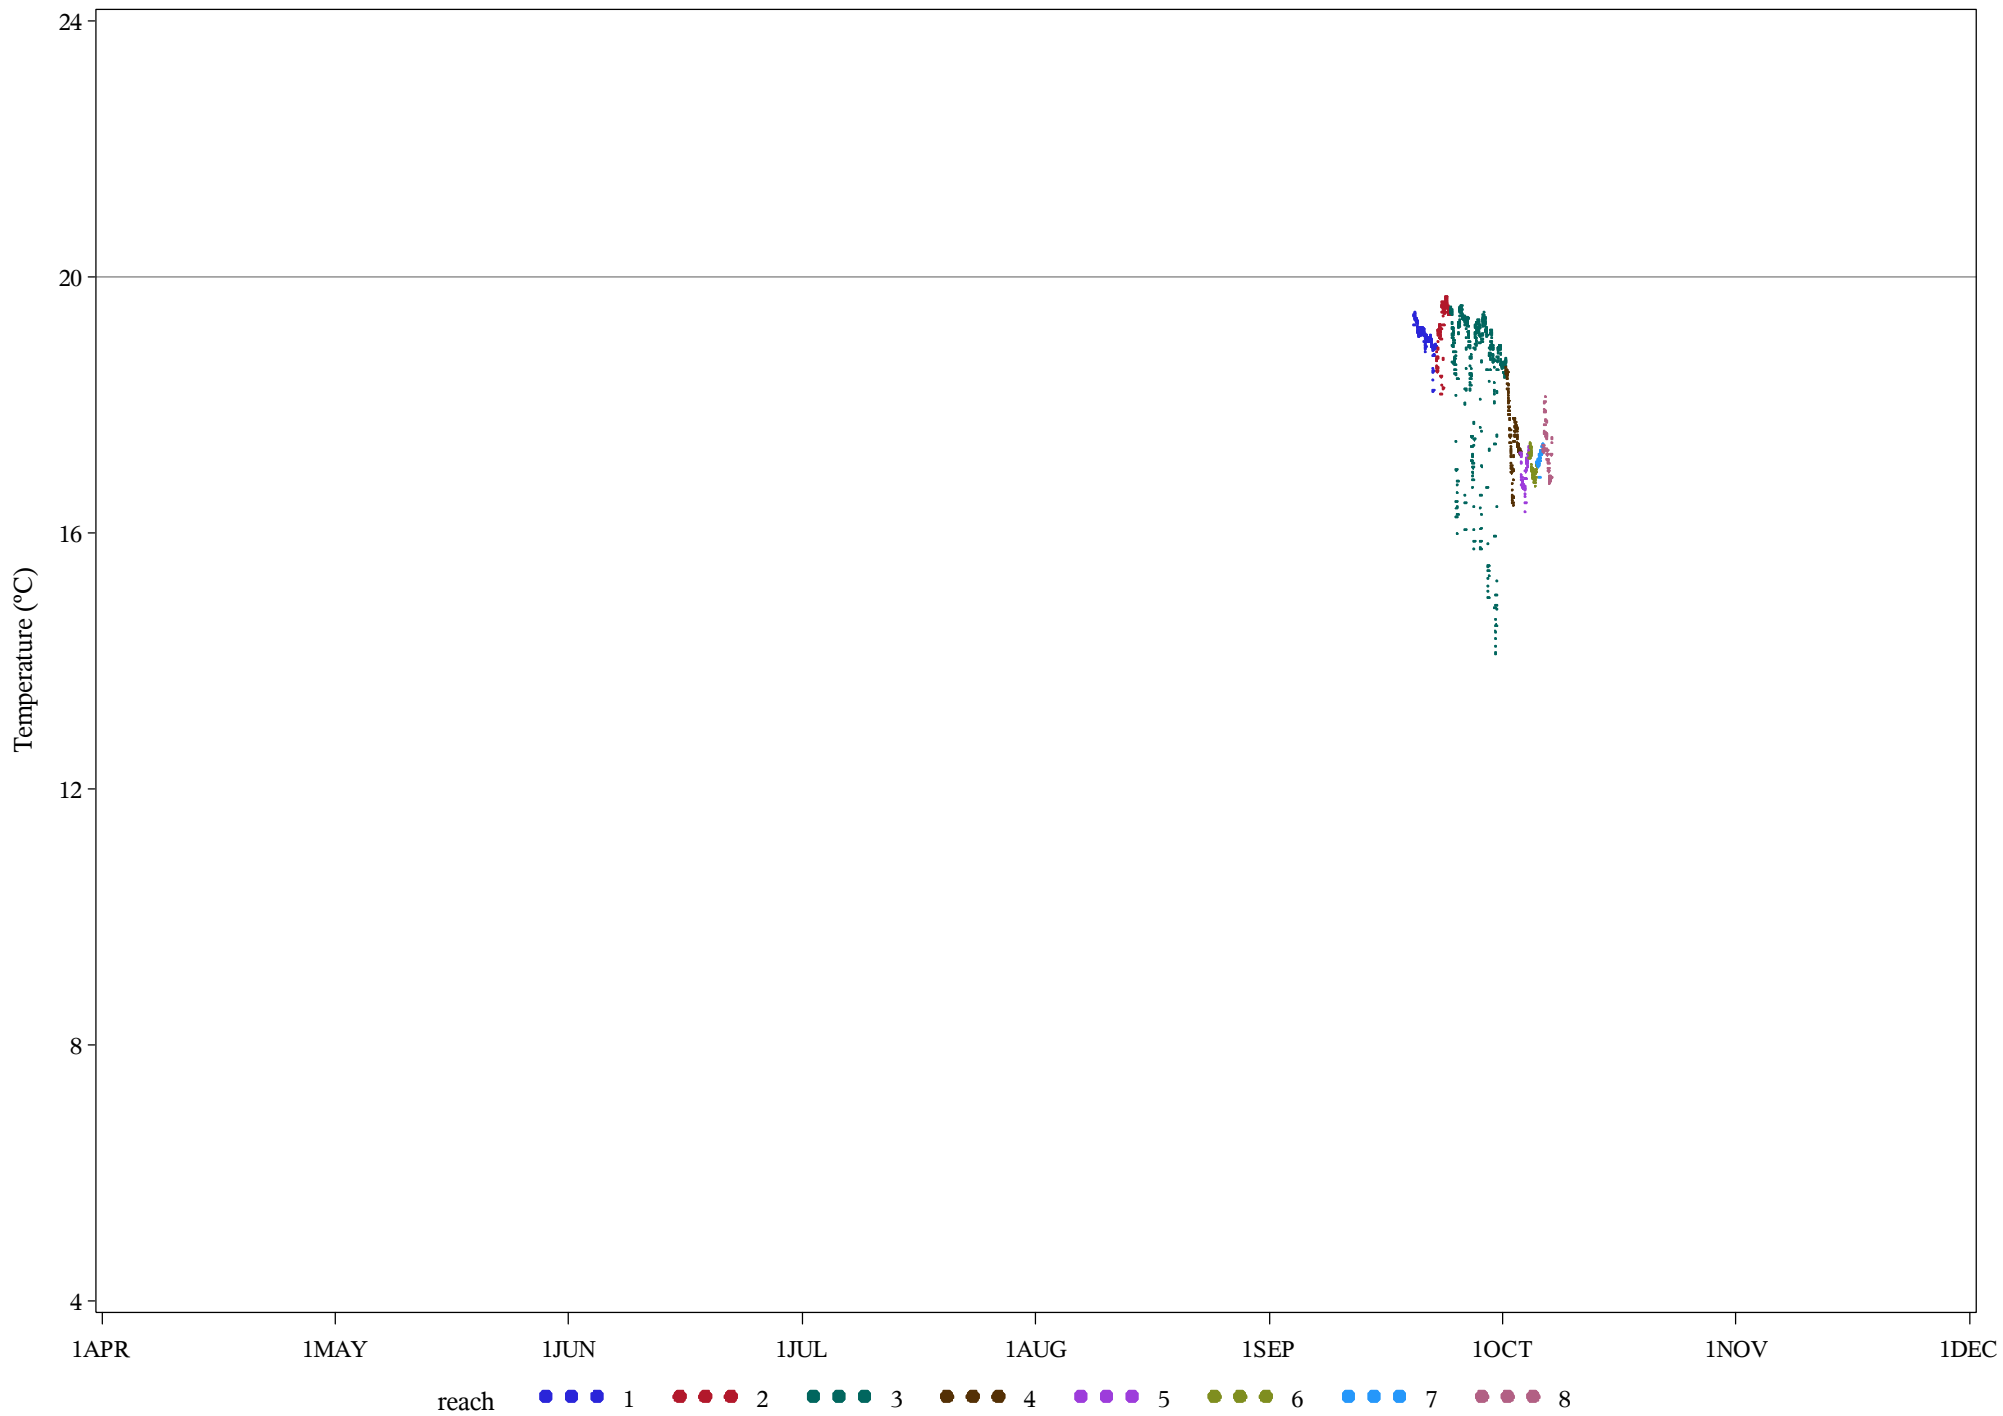

# Fall Chinook 3078B

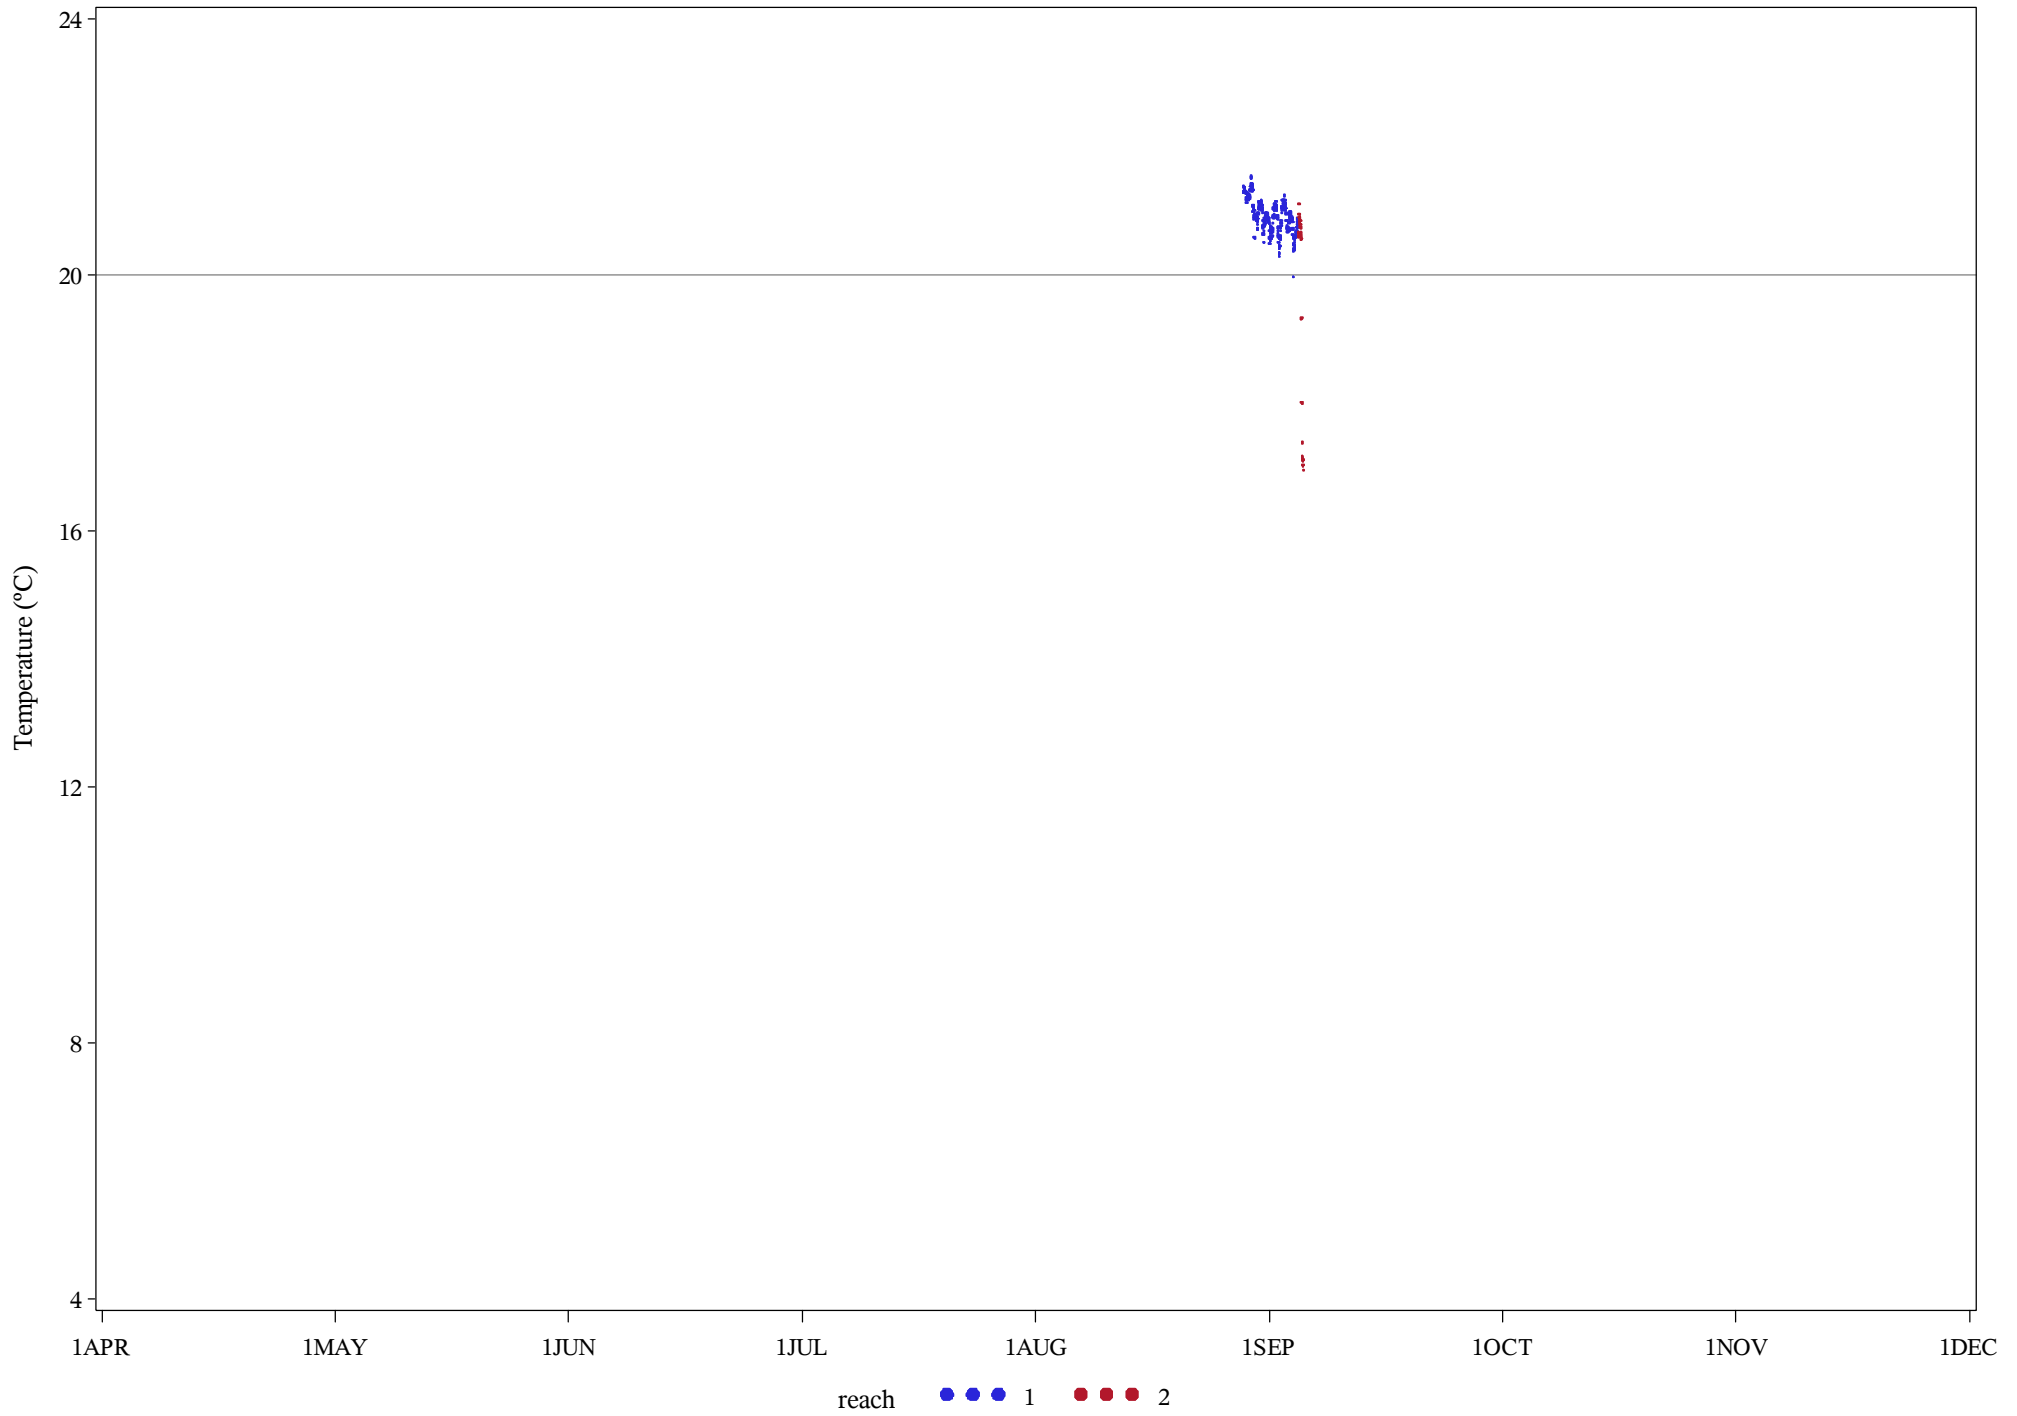

# Fall Chinook 3109B

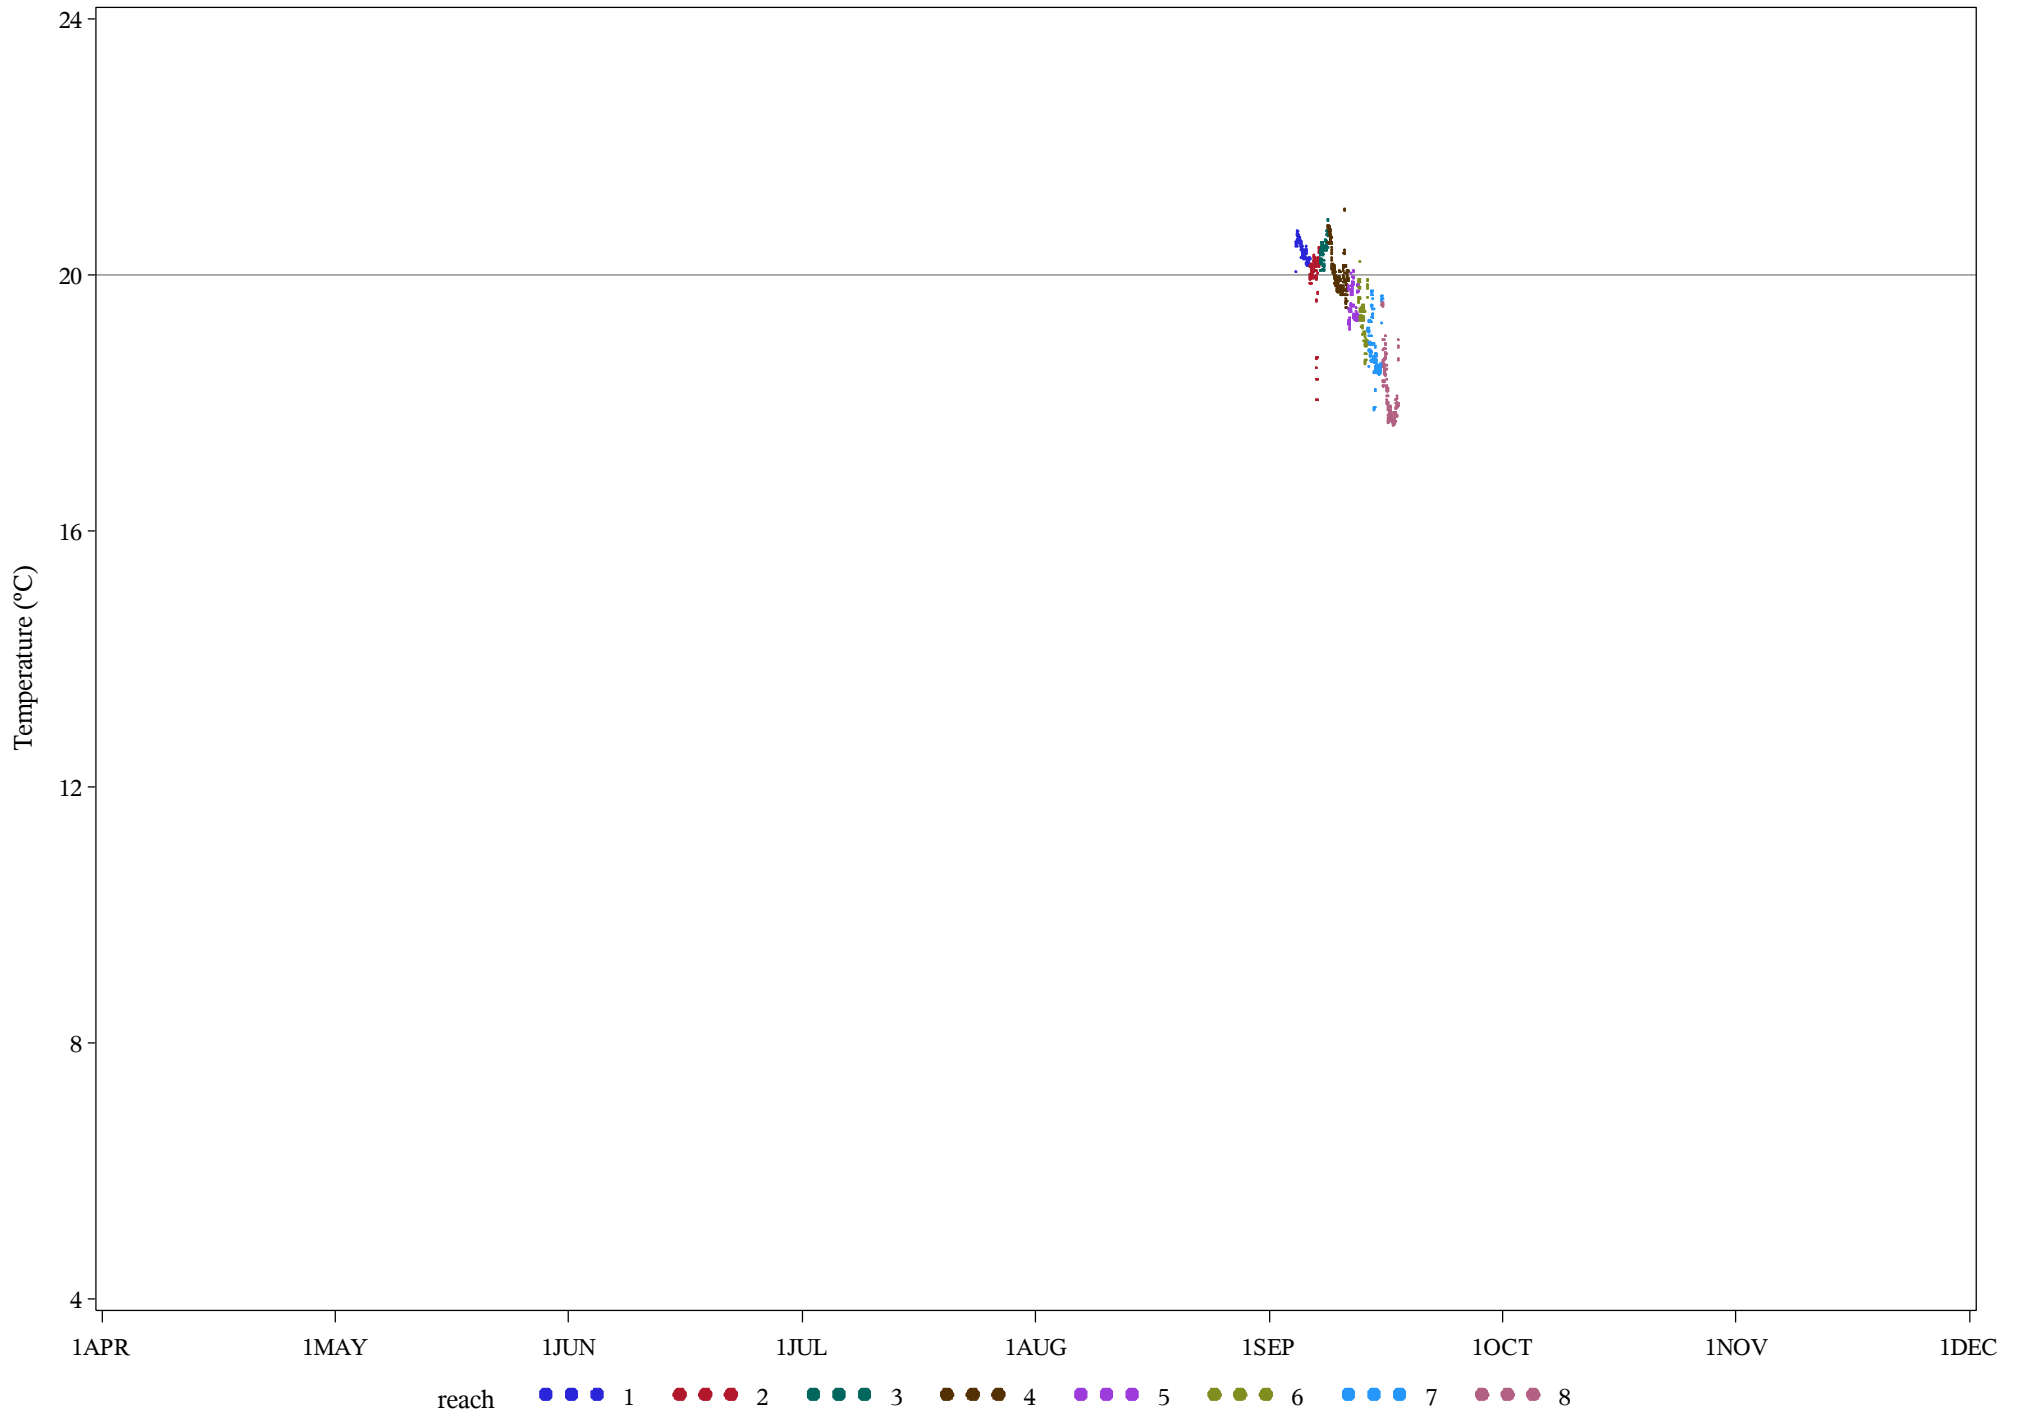

# Fall Chinook 3761B

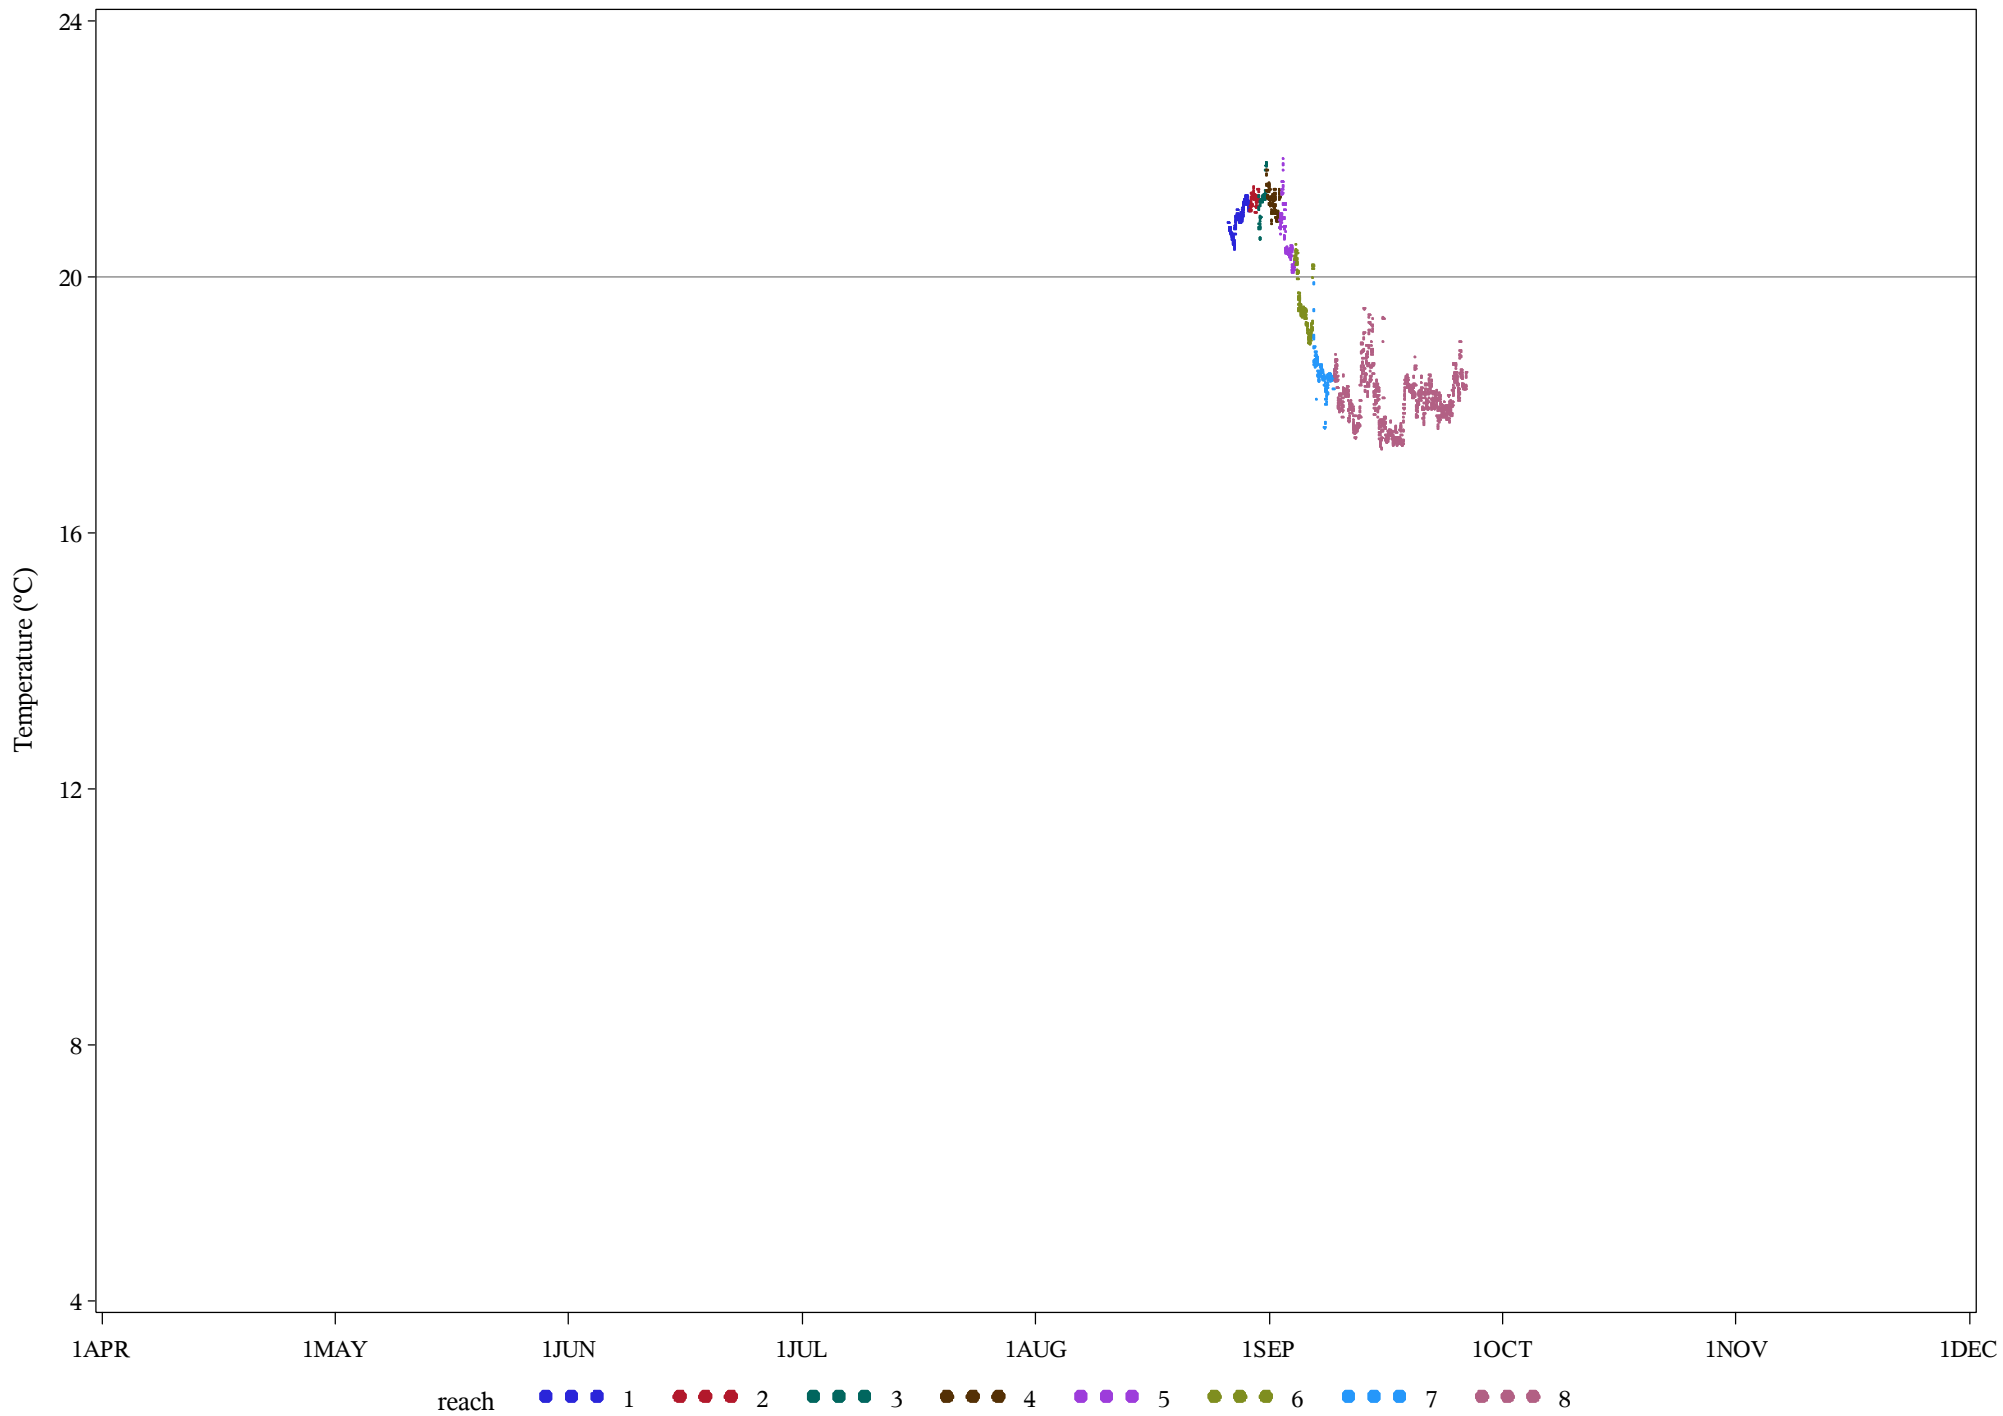

# Fall Chinook 3787B

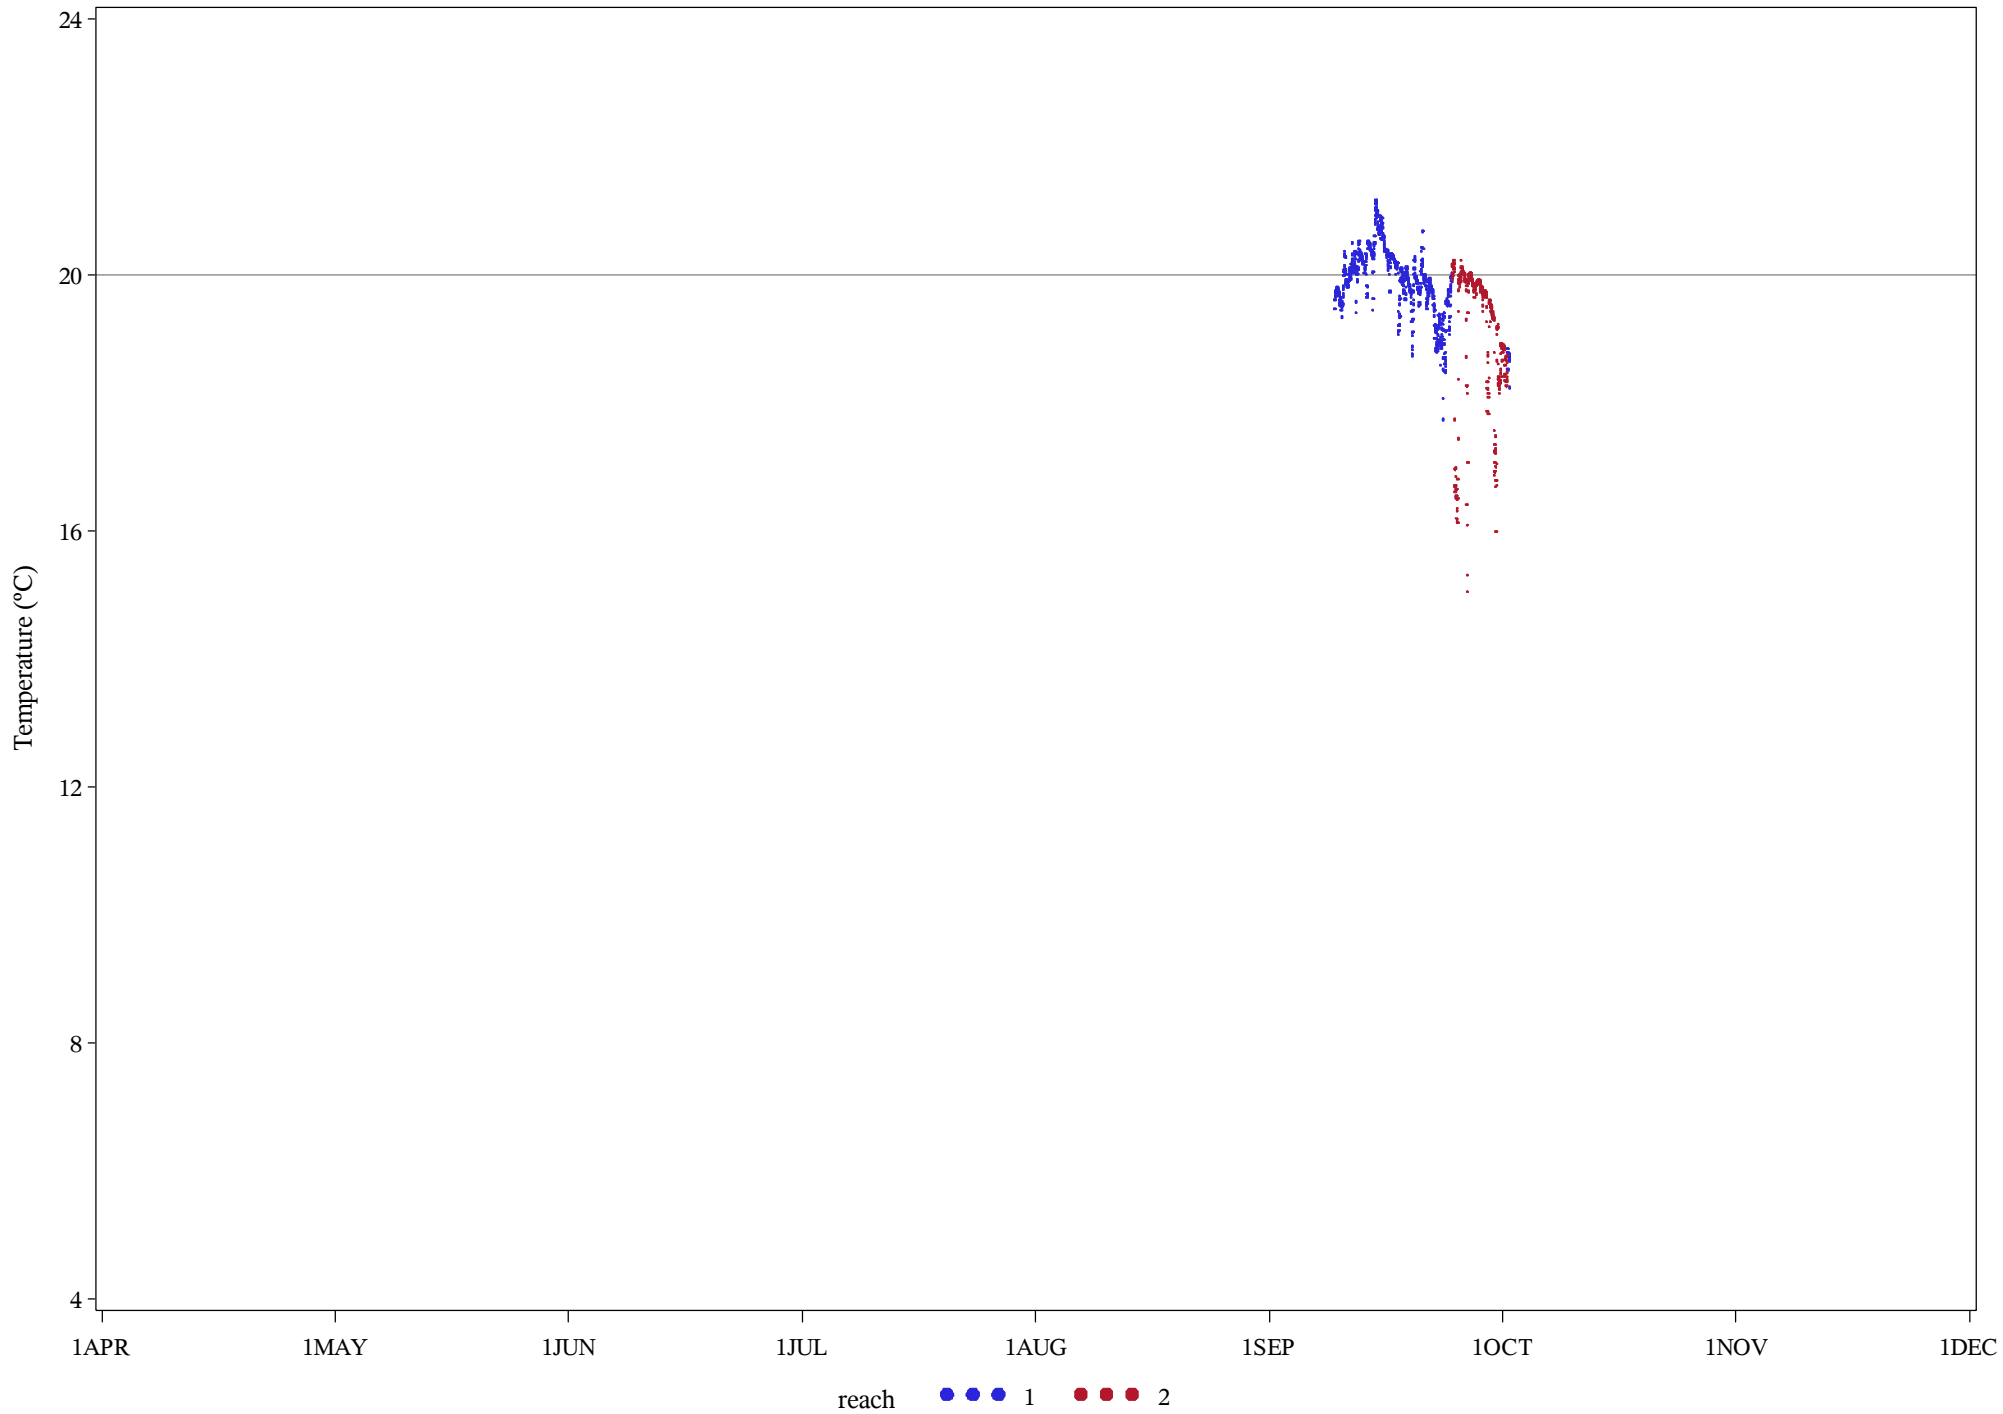

# Fall Chinook 3805B

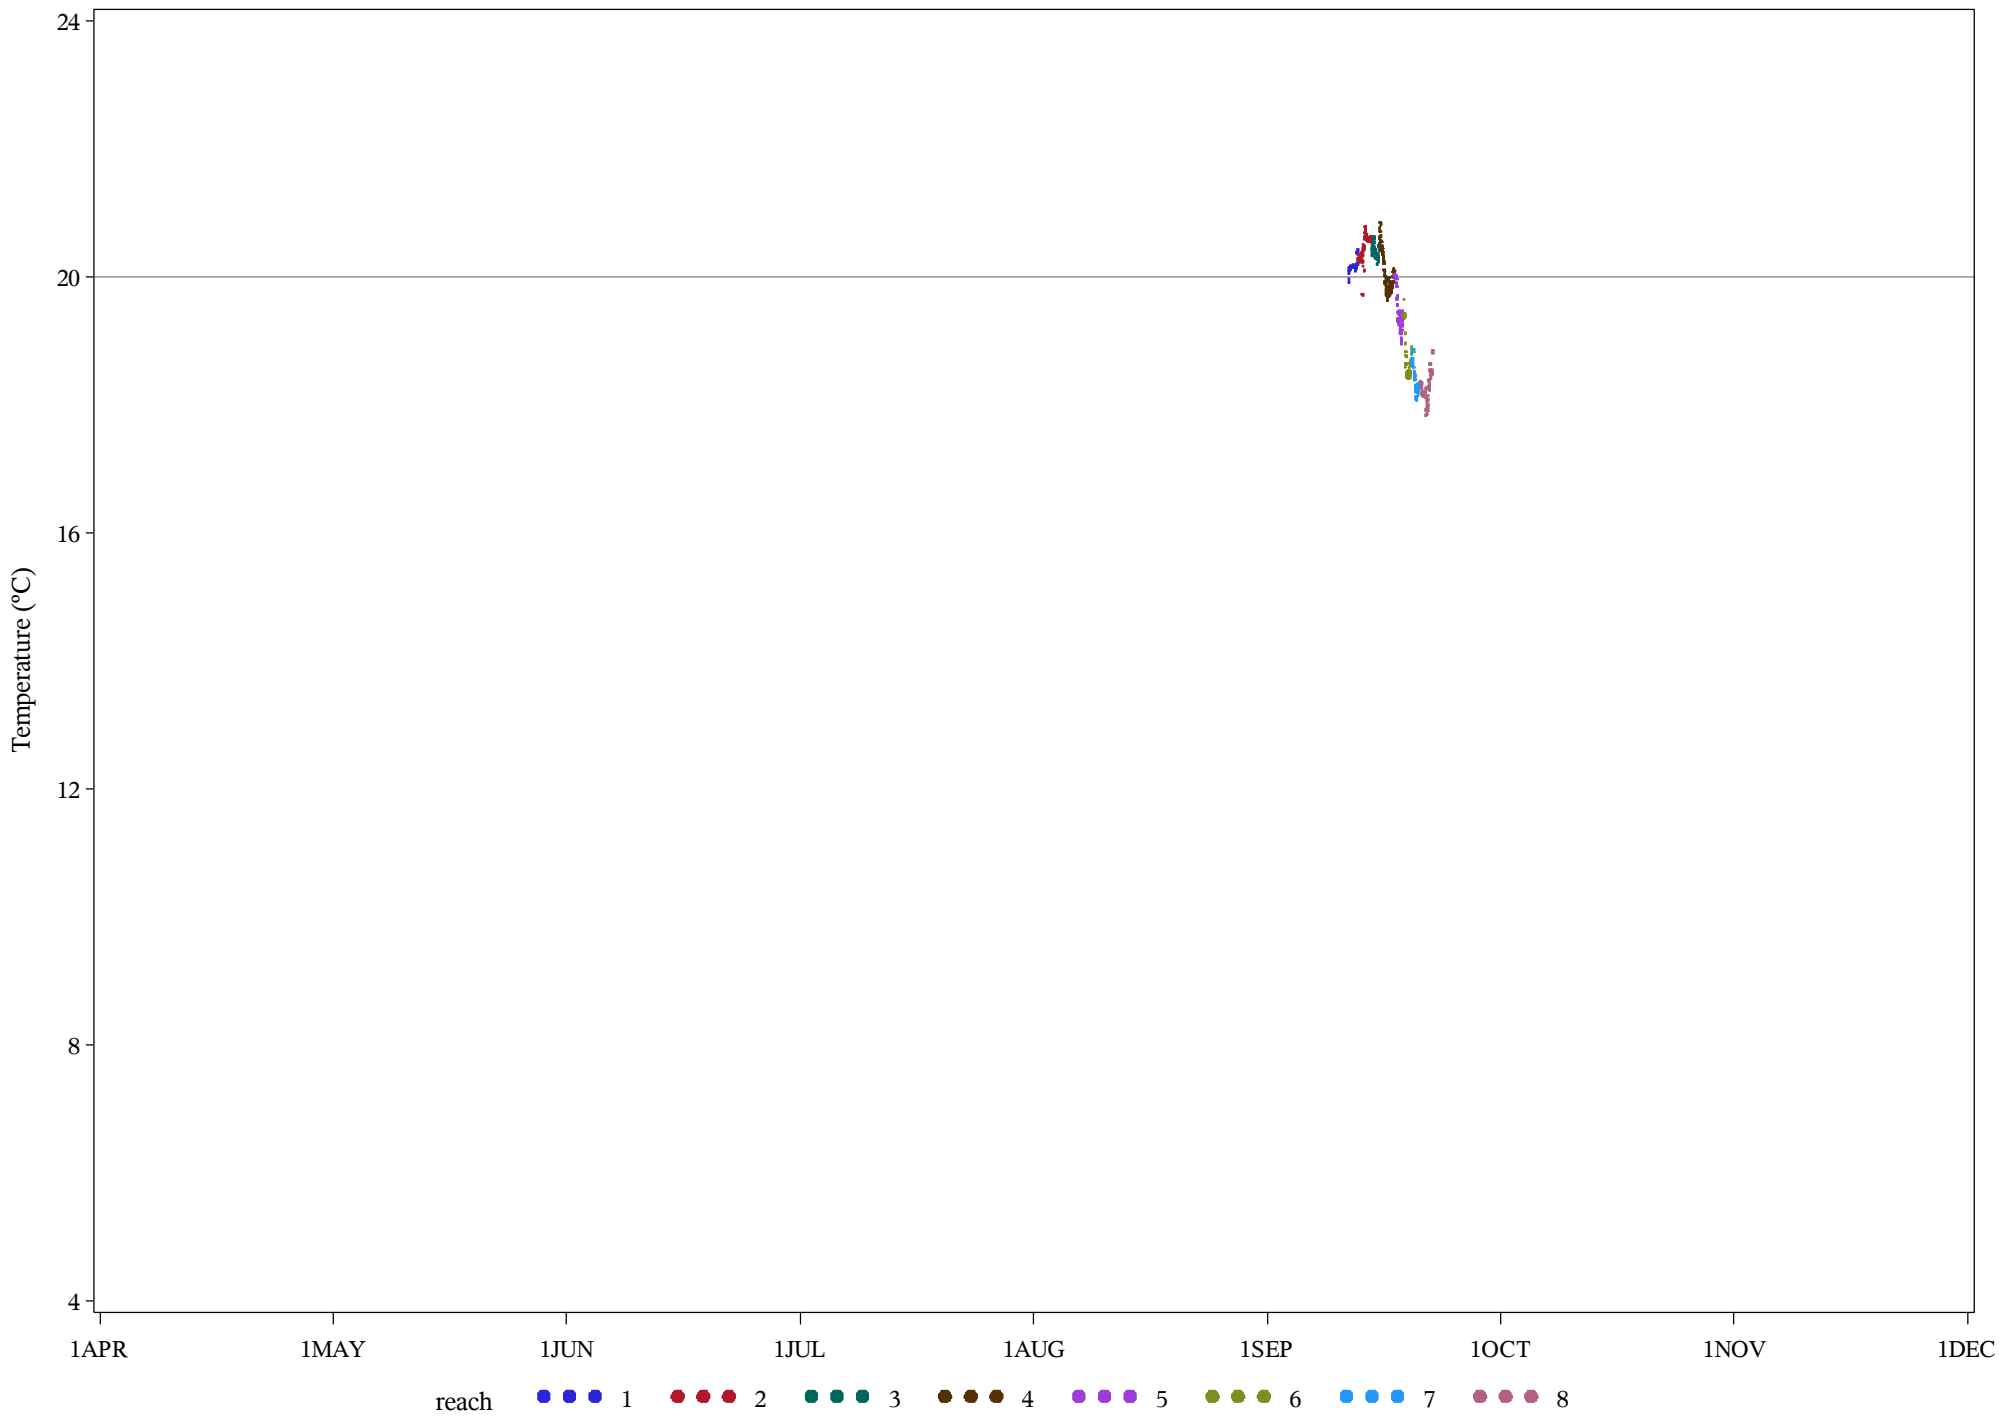

# Fall Chinook 4692A

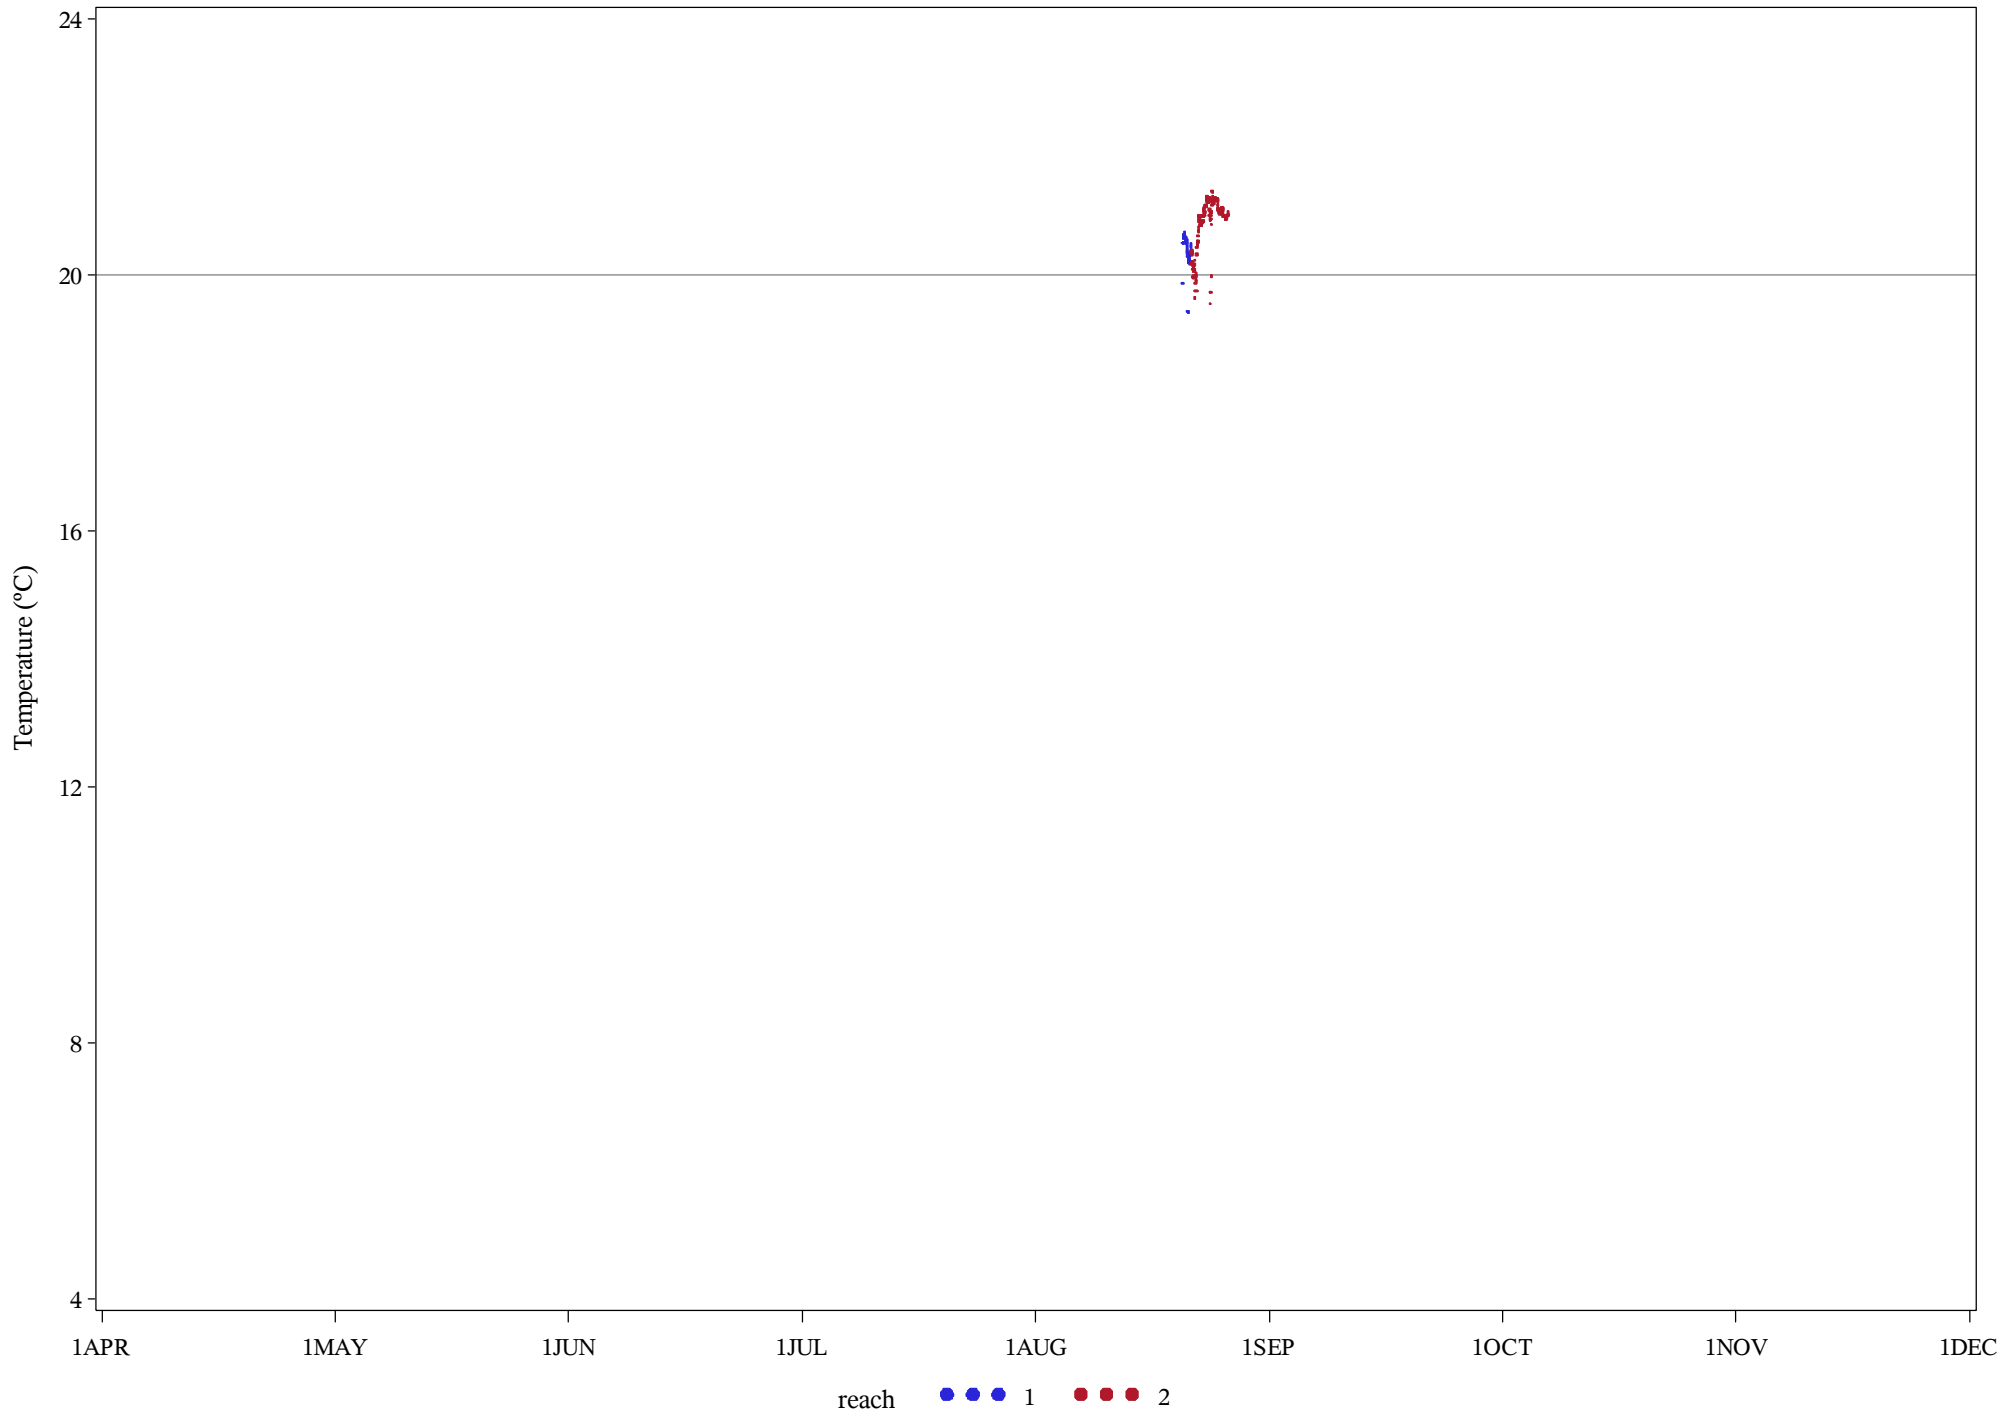



# Fall Chinook 4754B

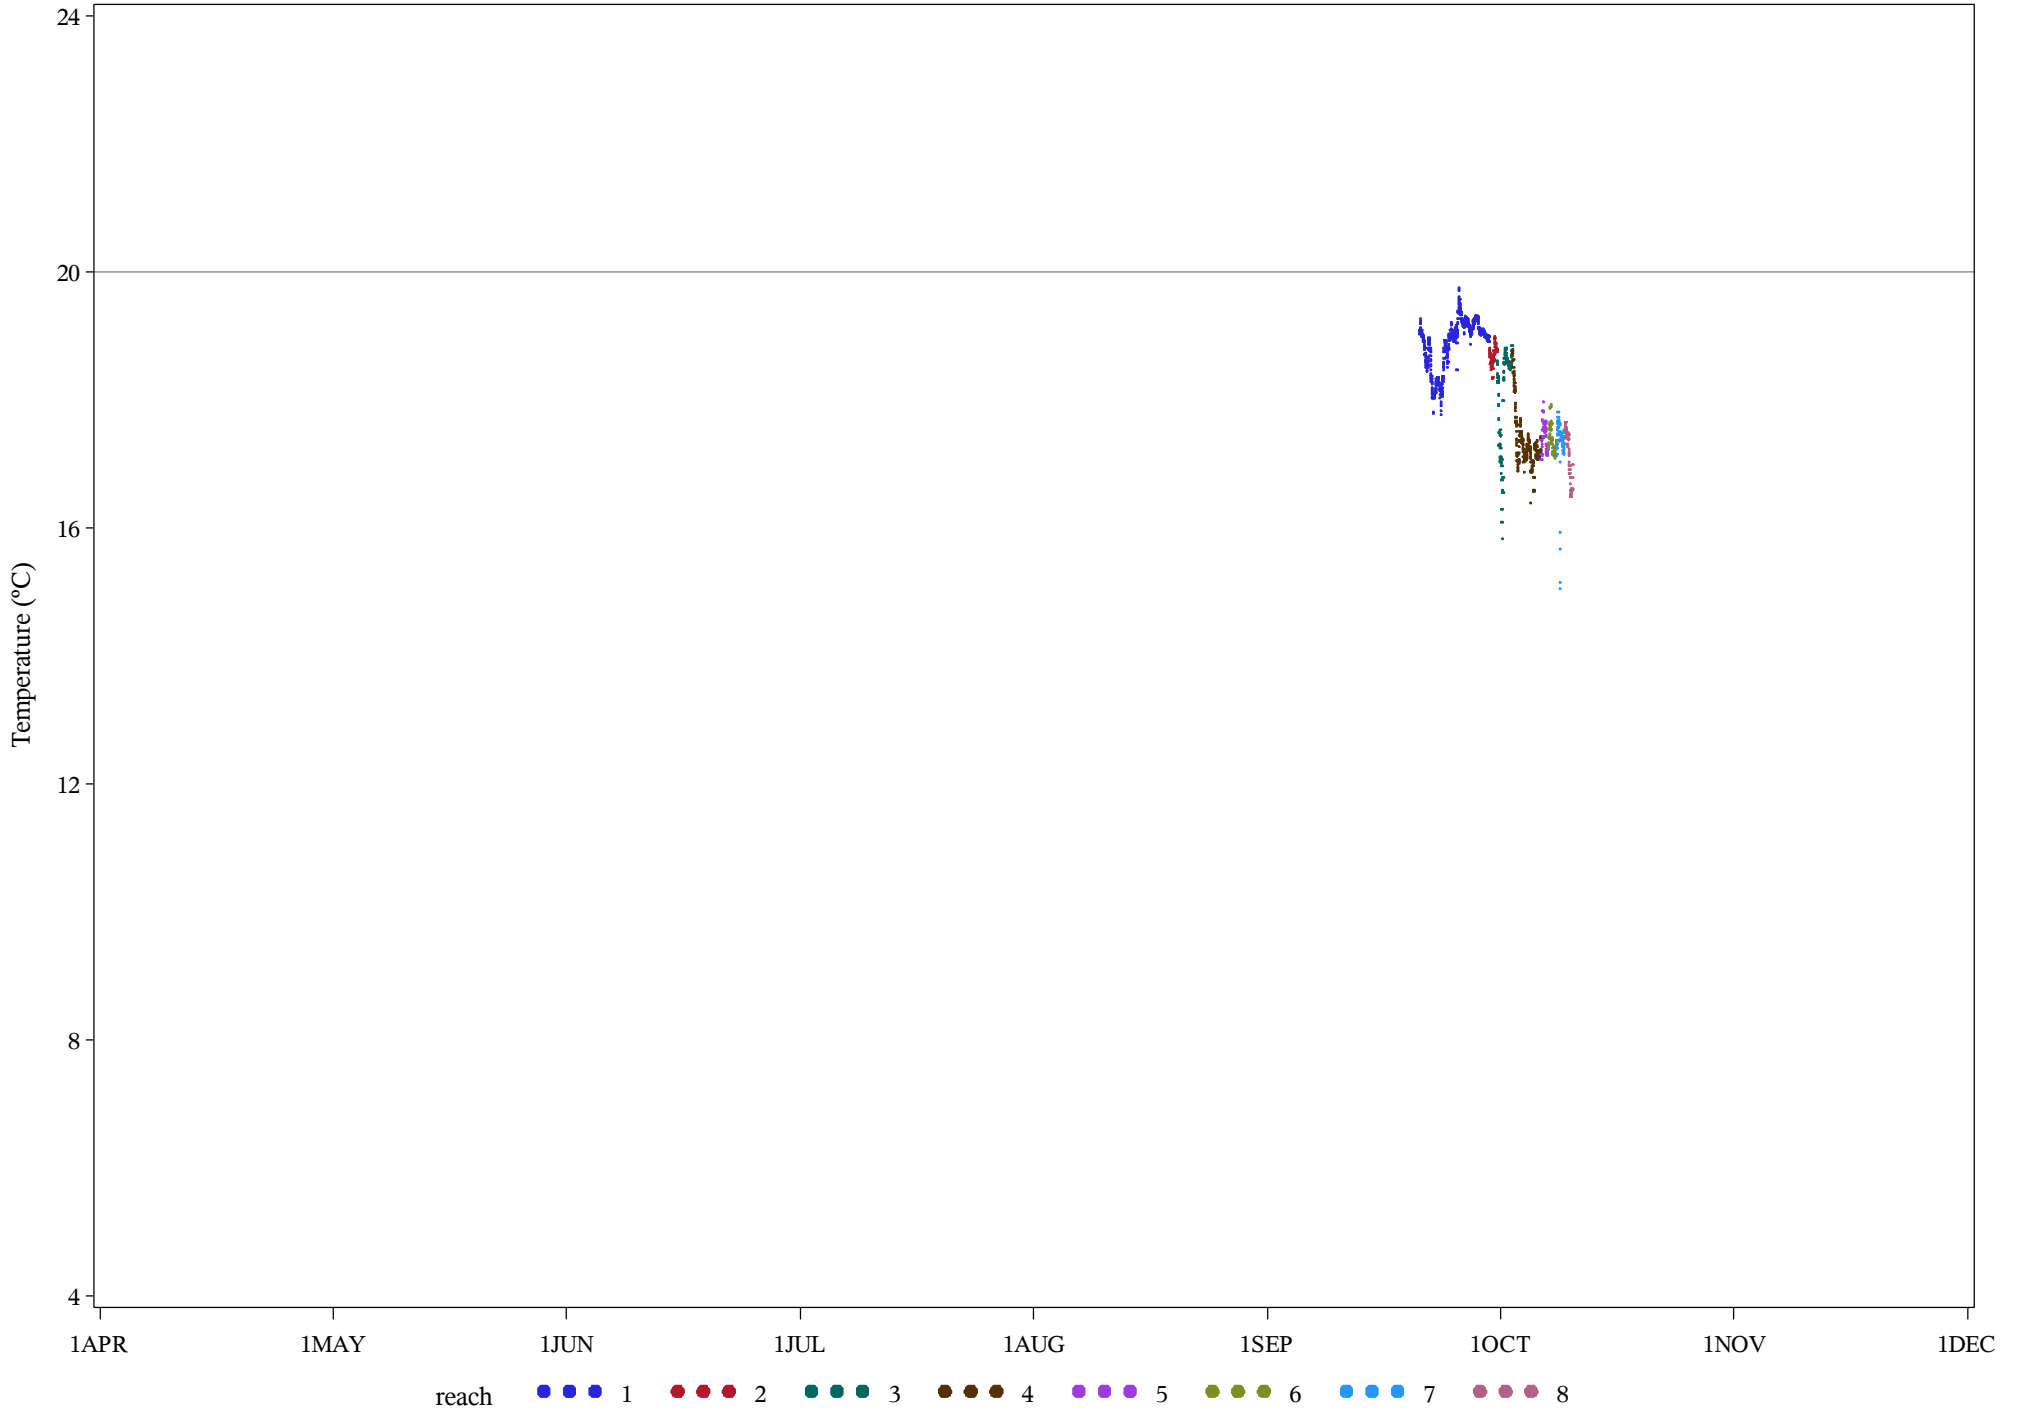

# Fall Chinook 4762B

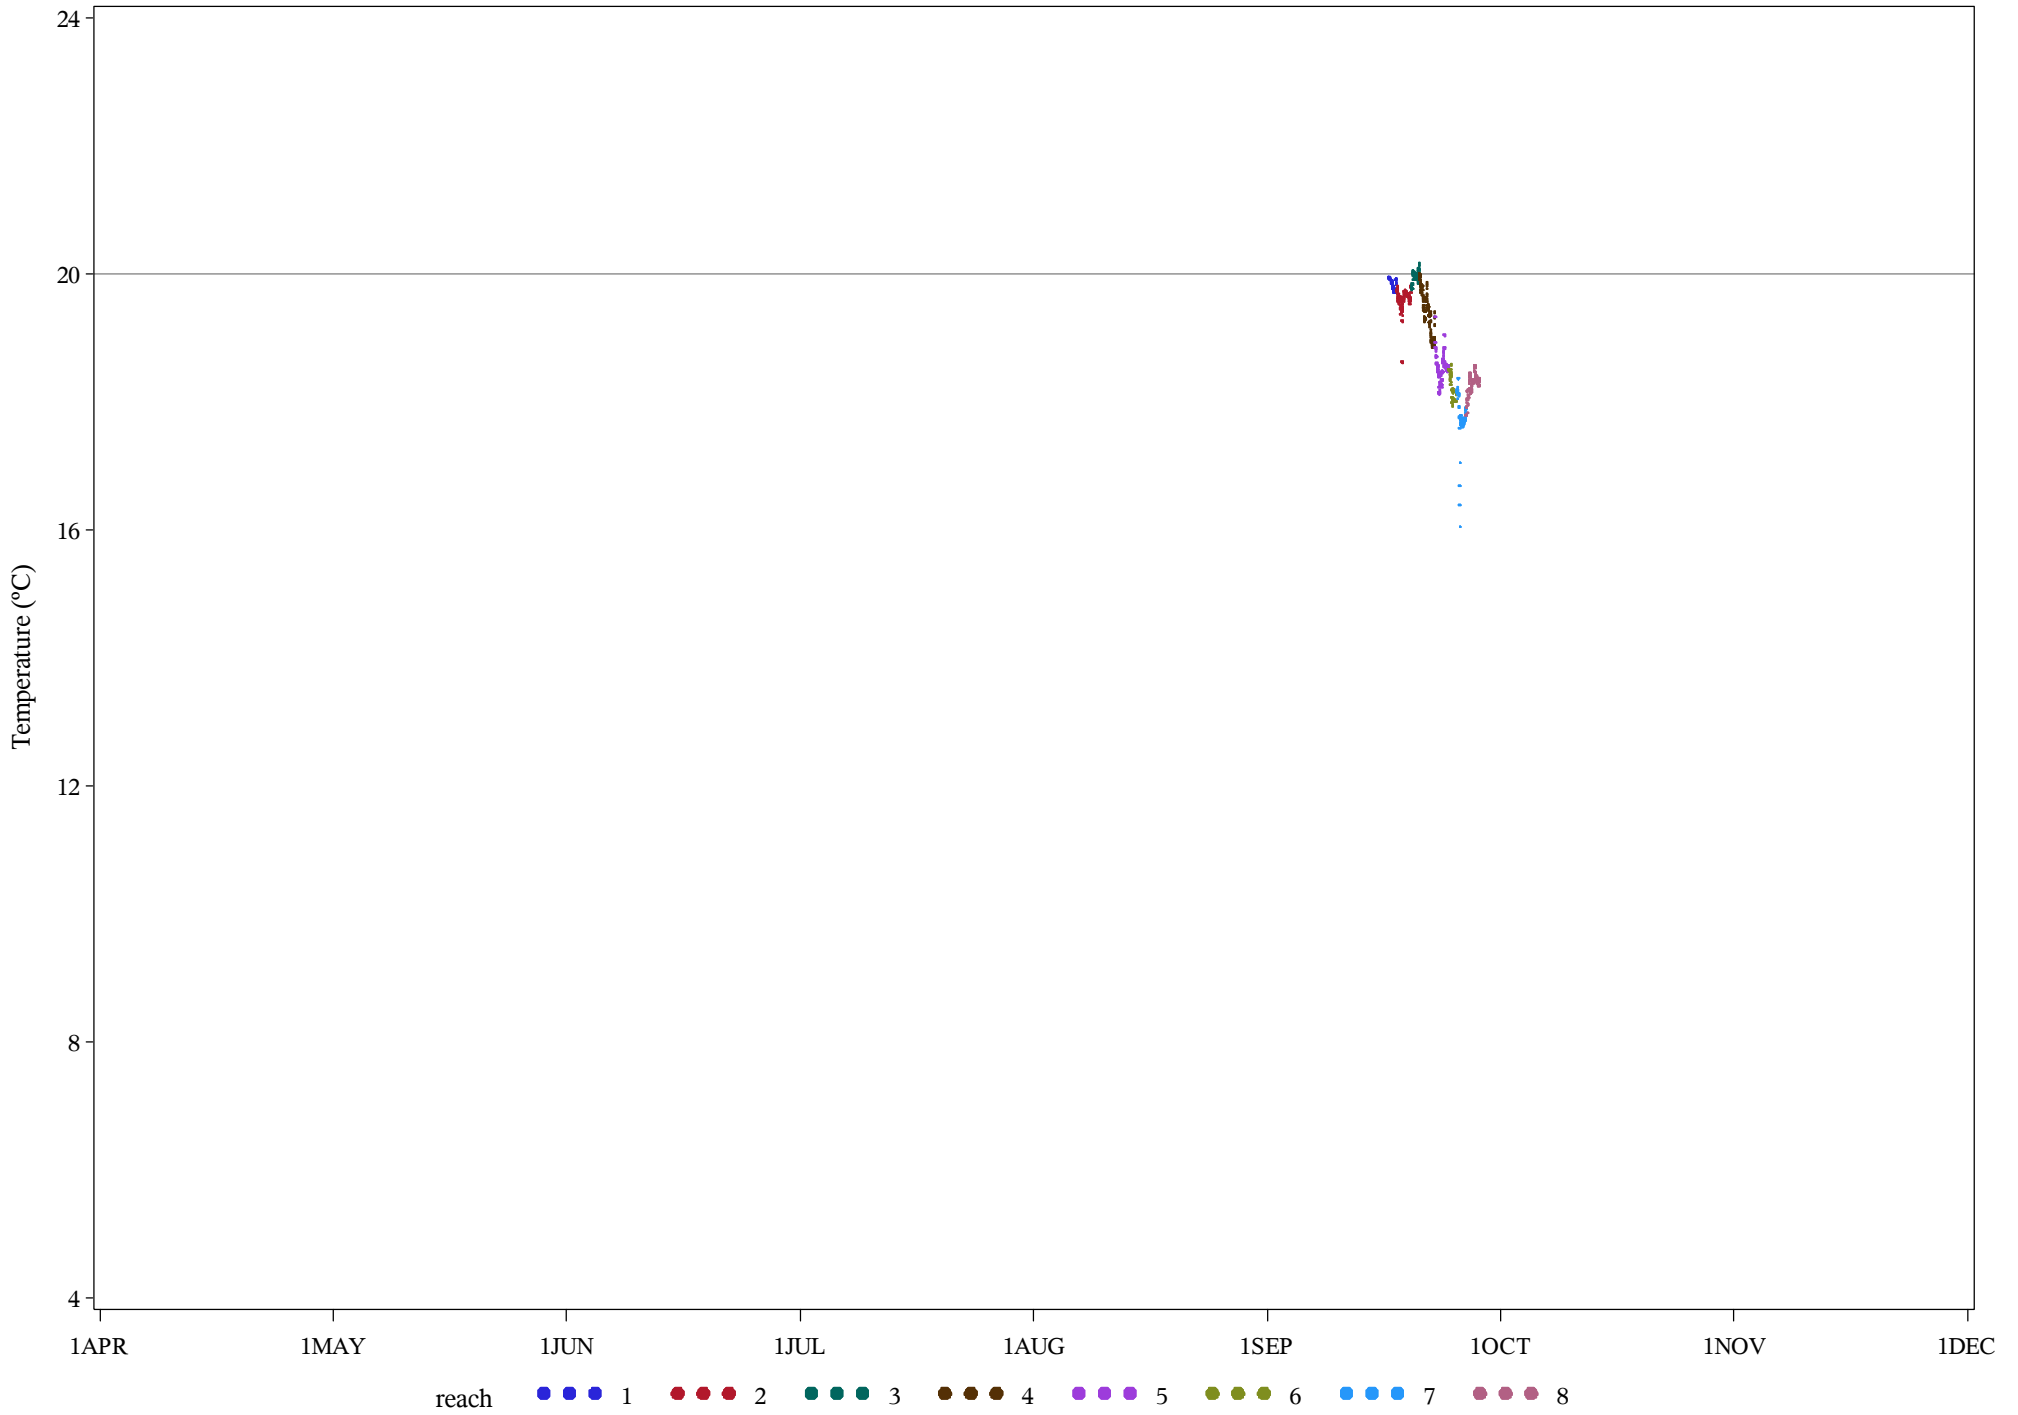

# Fall Chinook 4819B

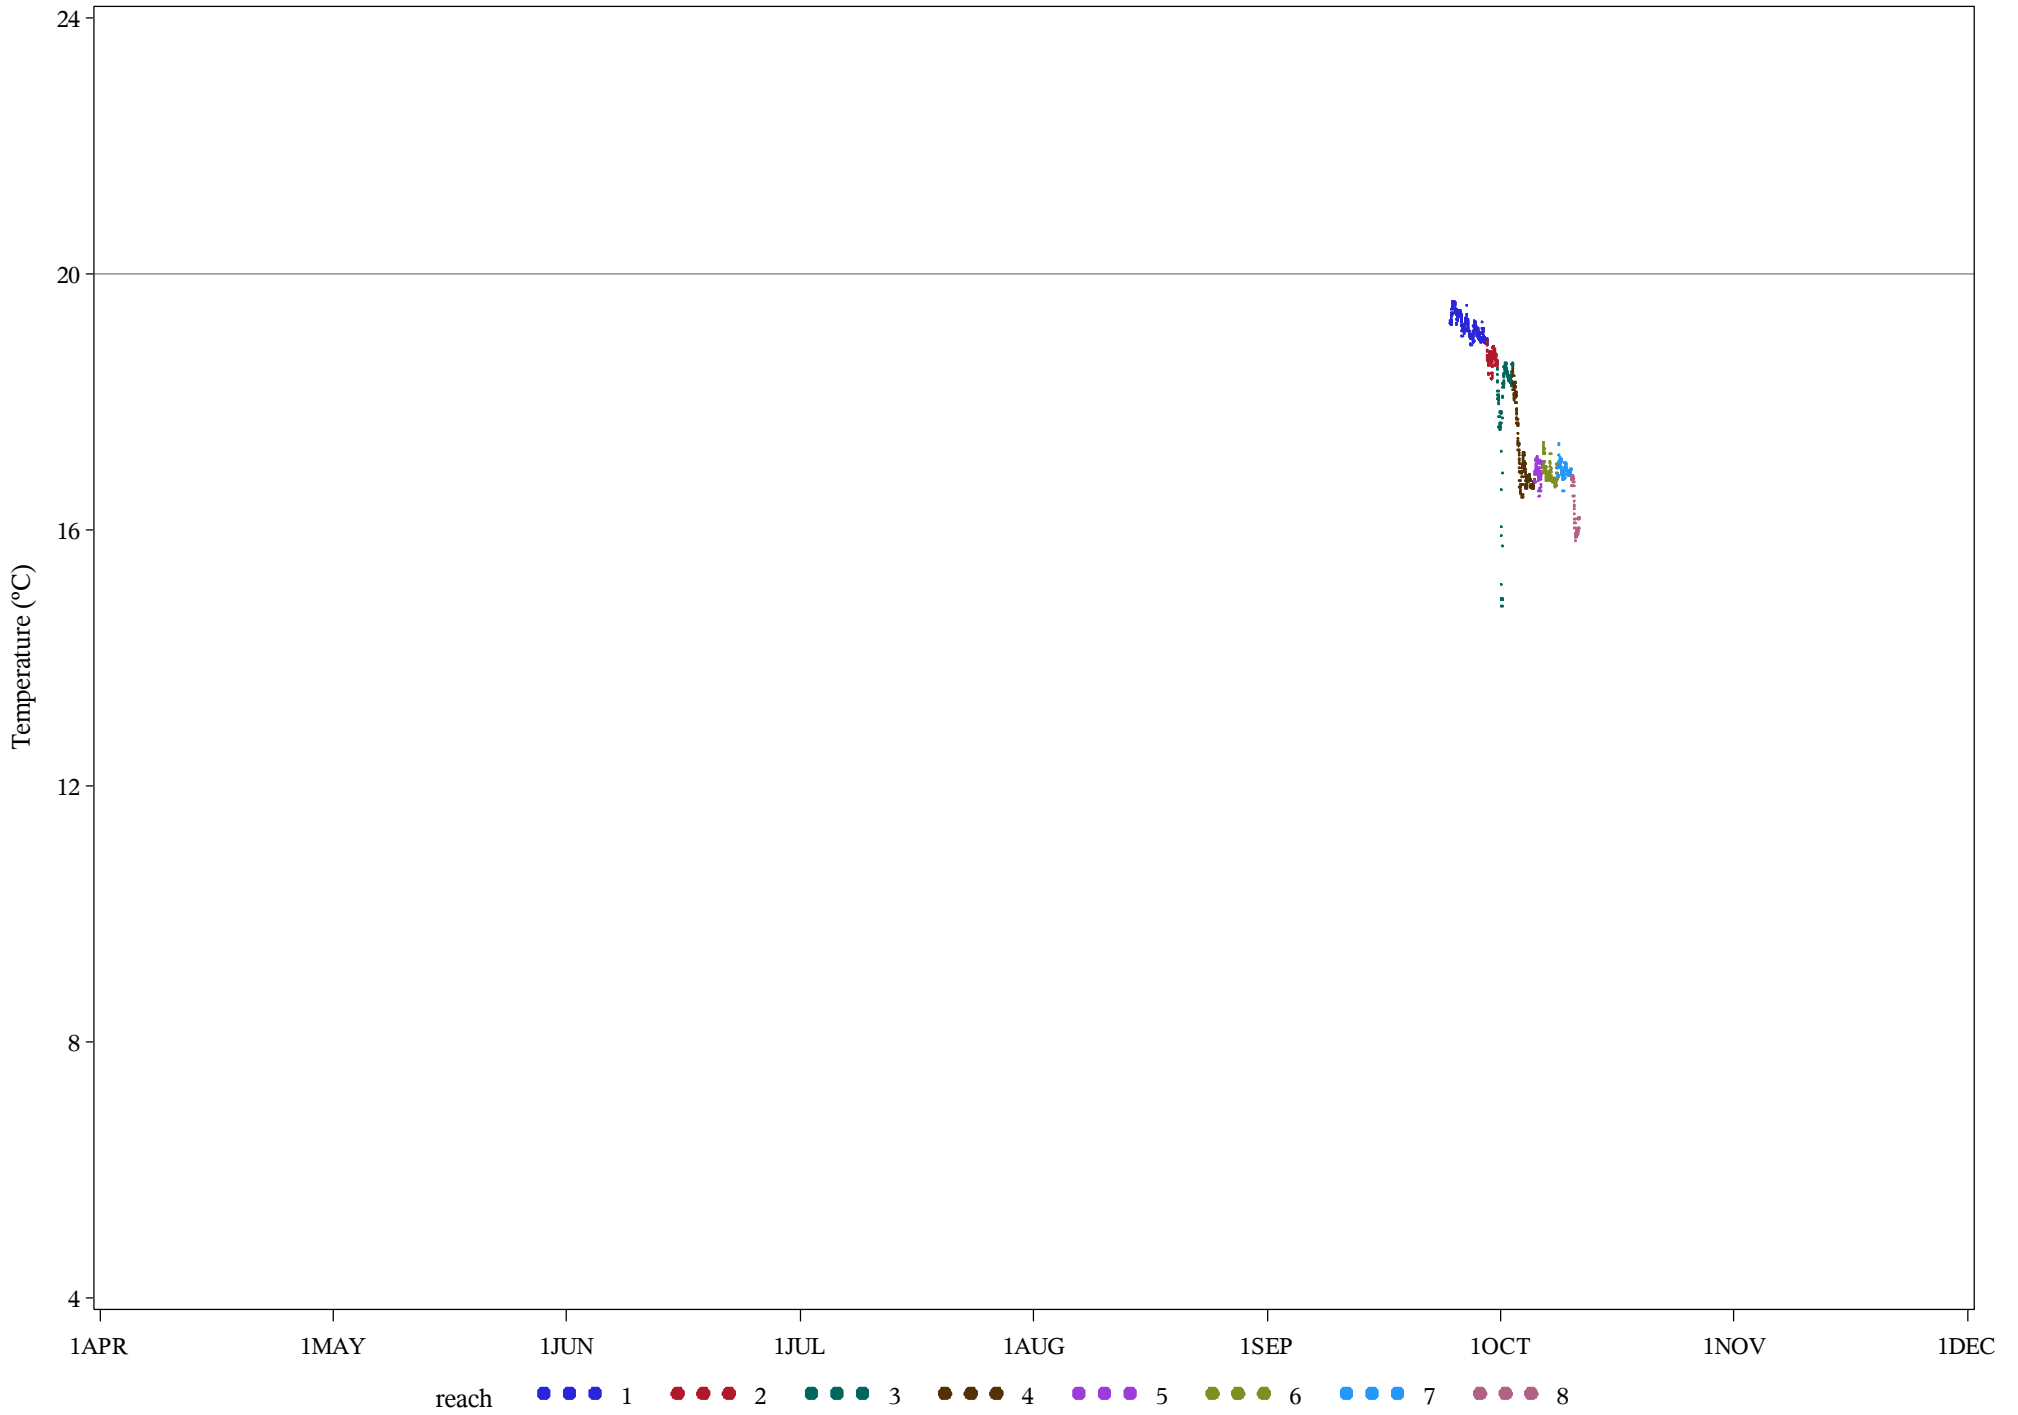

# Fall Chinook 4829B

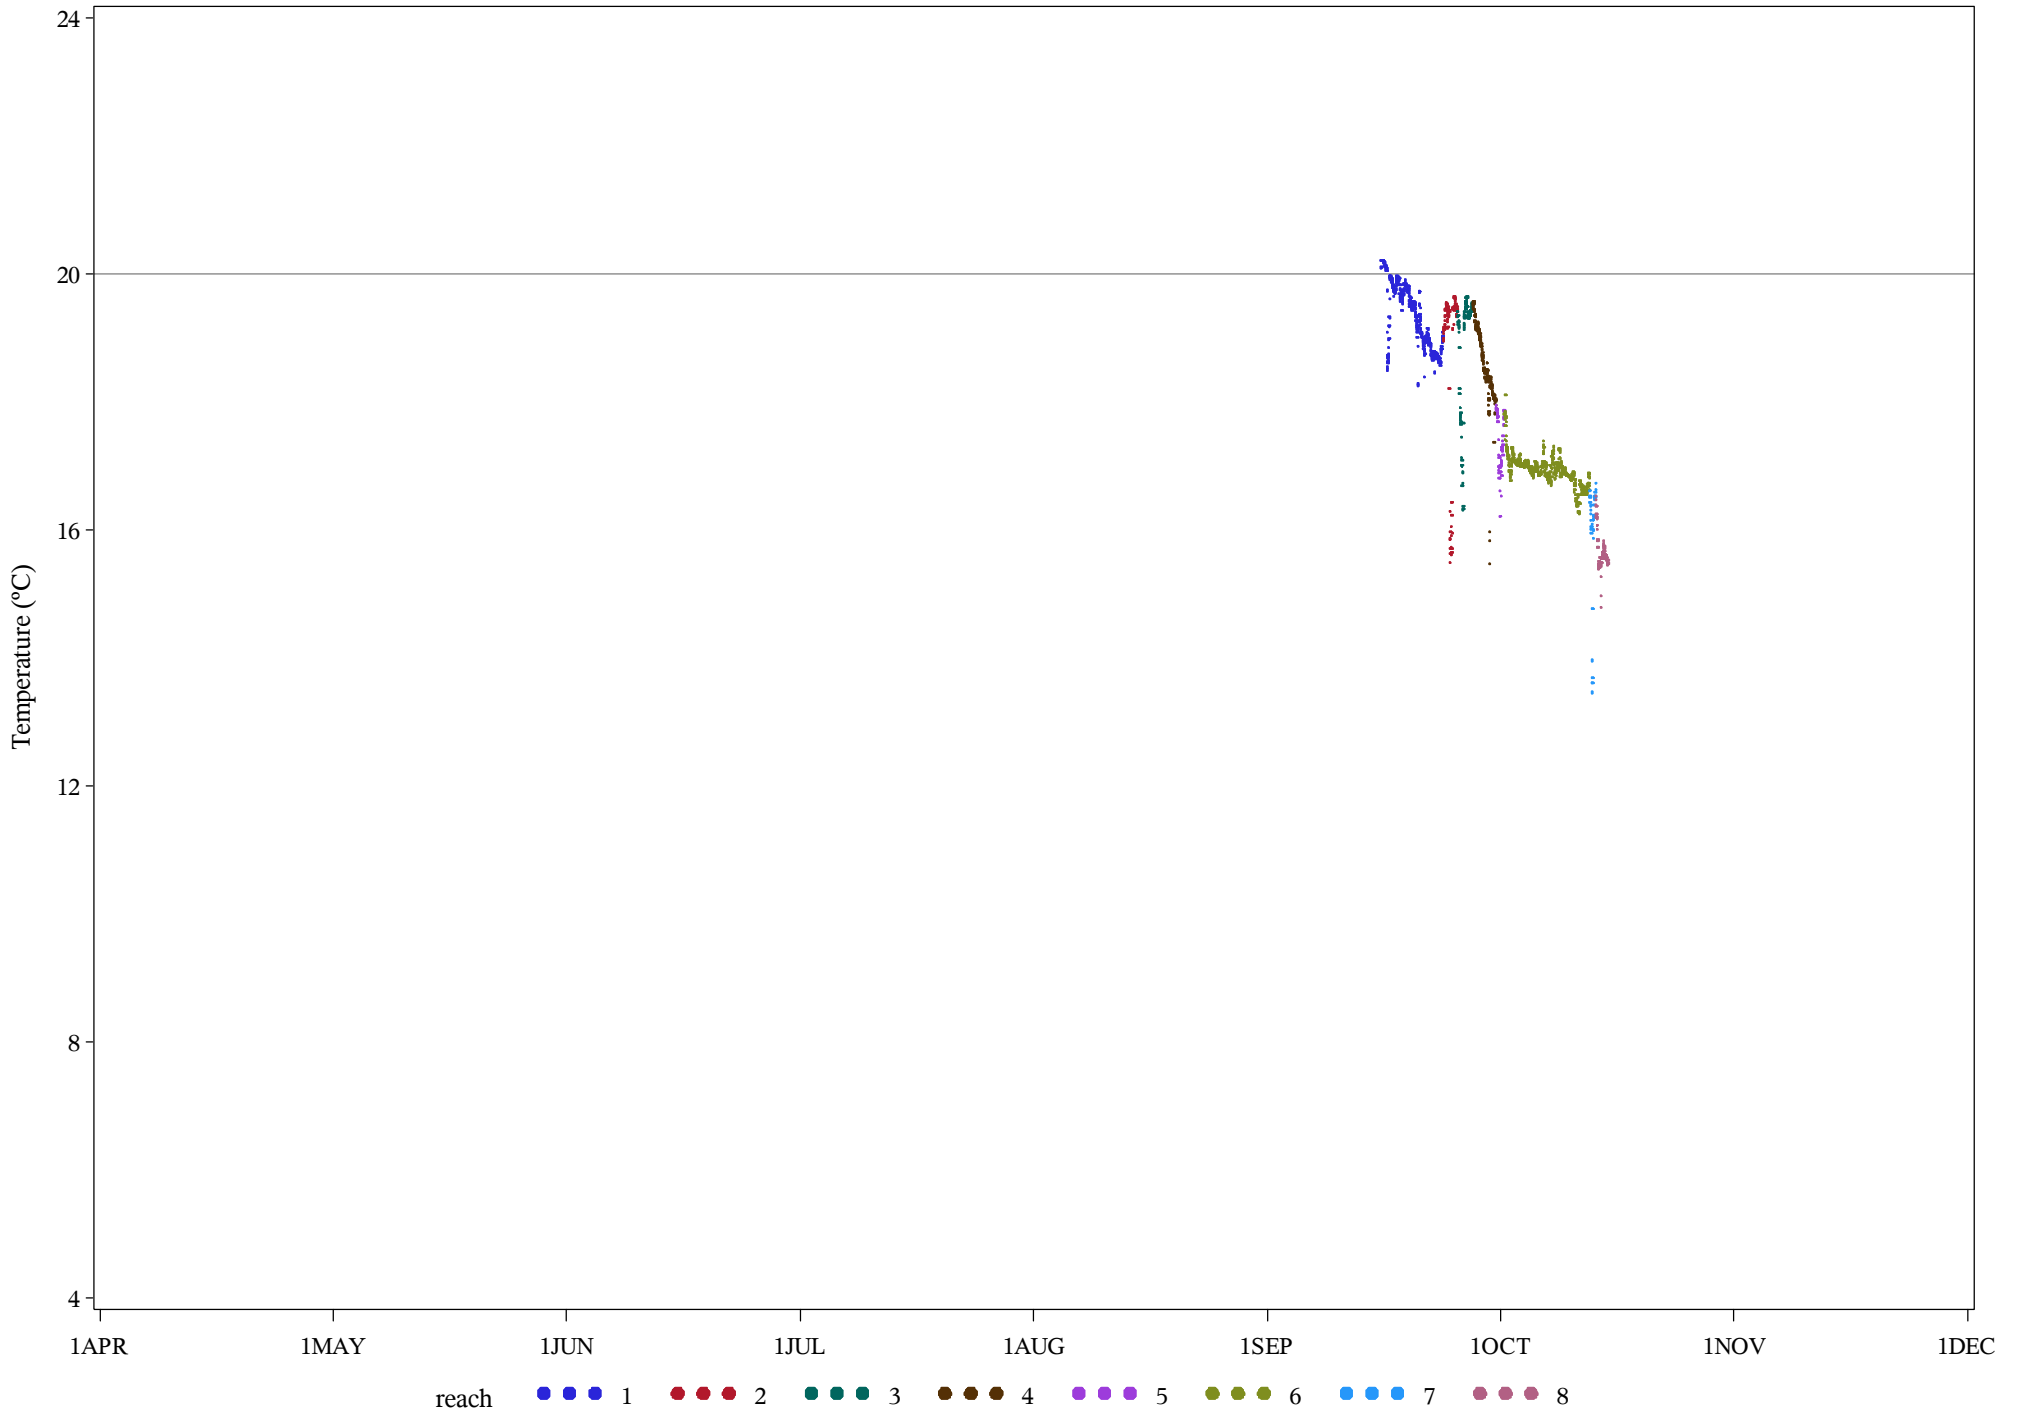

# Fall Chinook 4869B

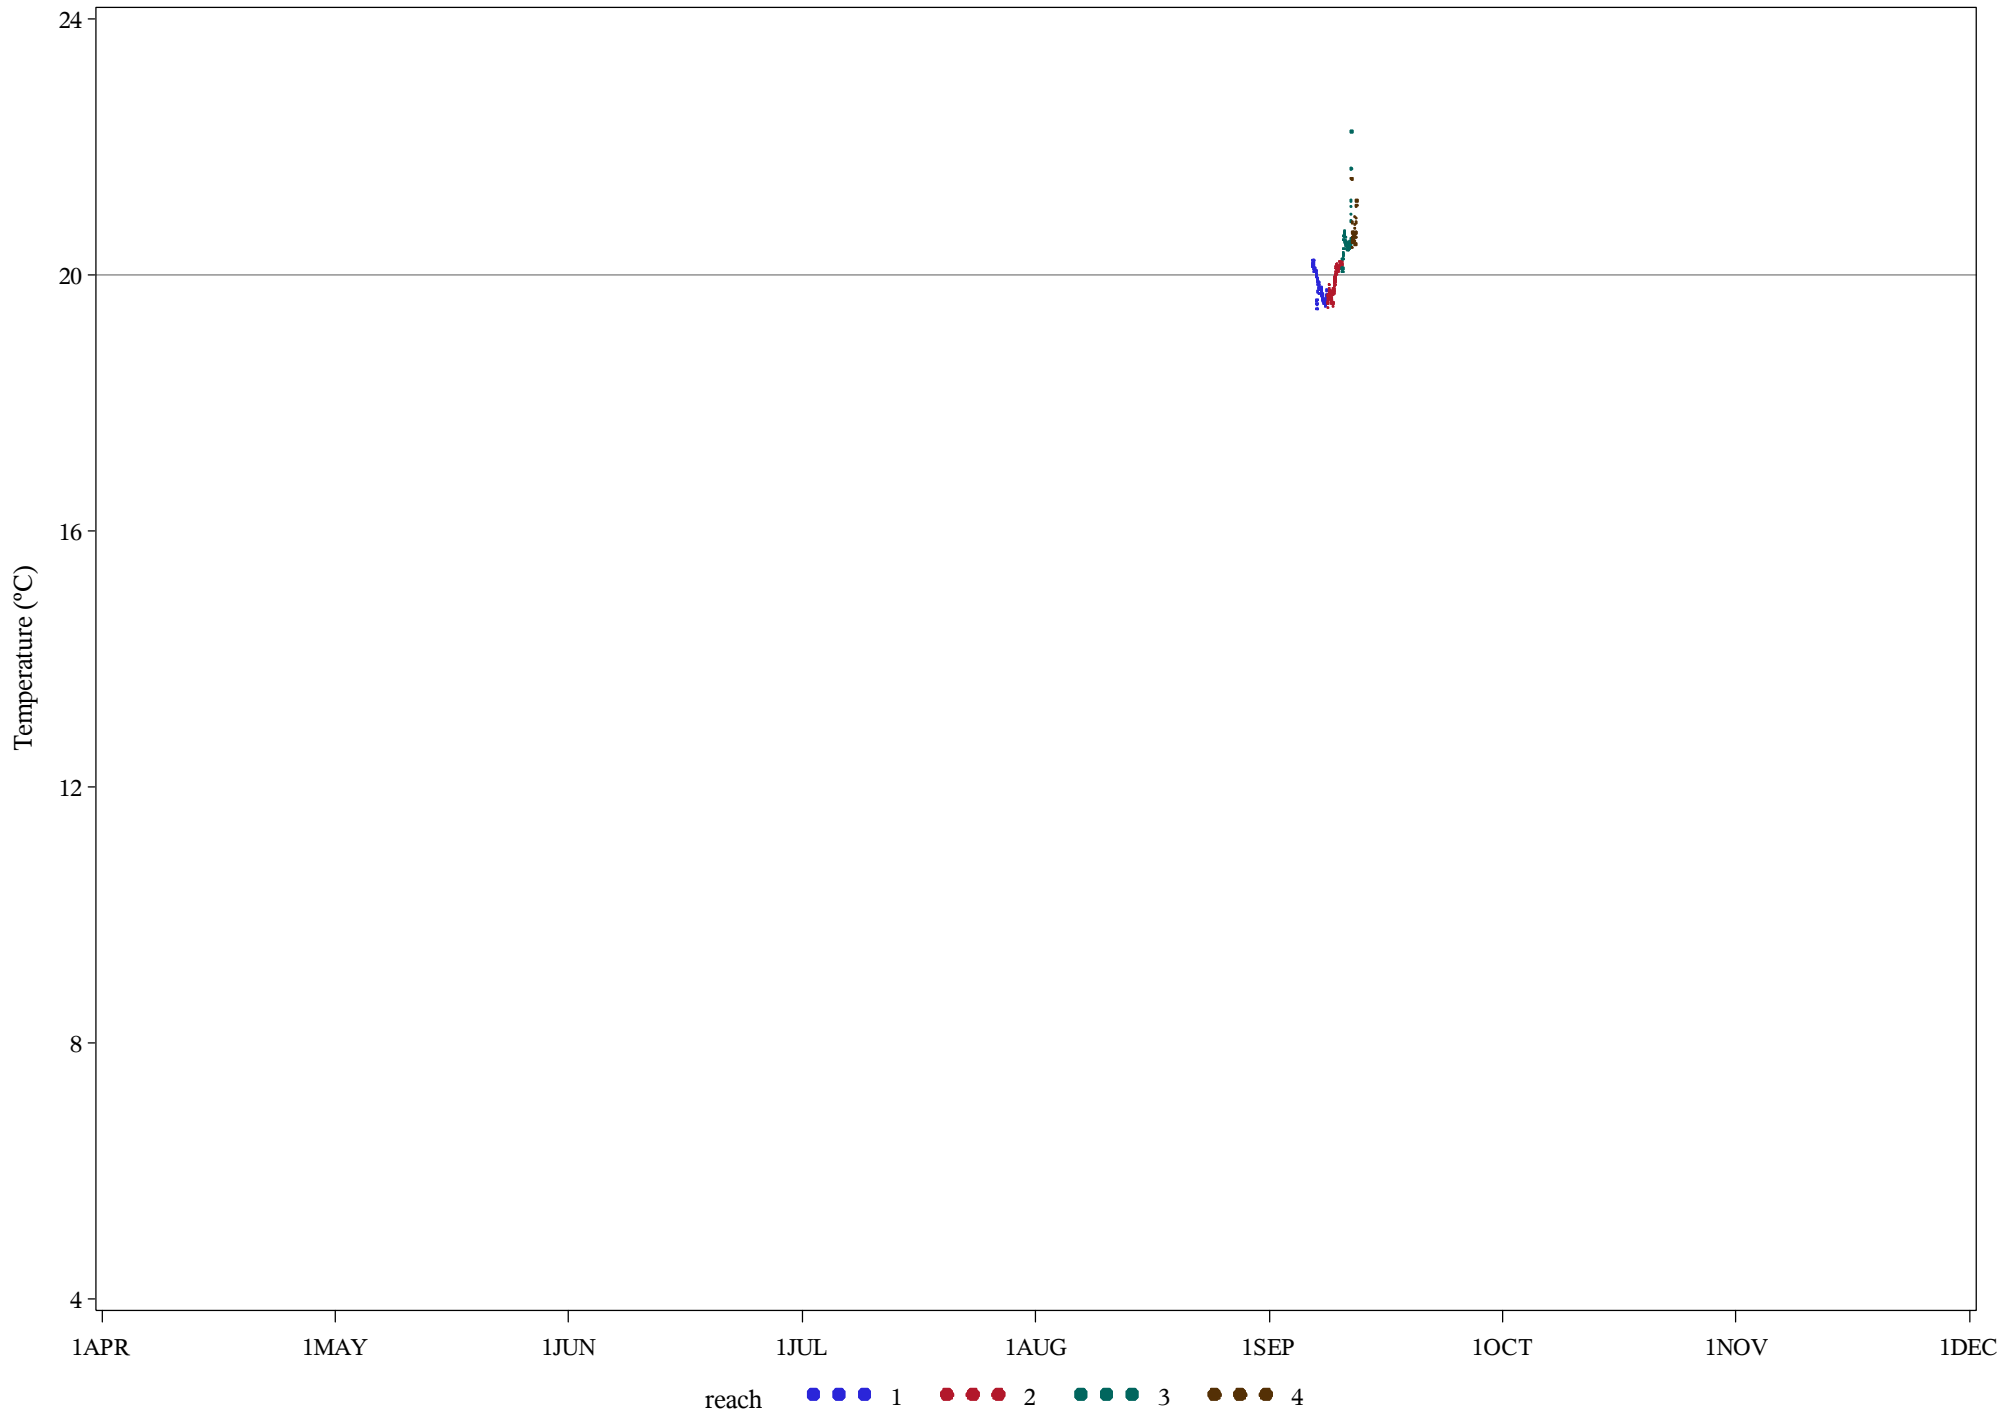

# Fall Chinook 4876B

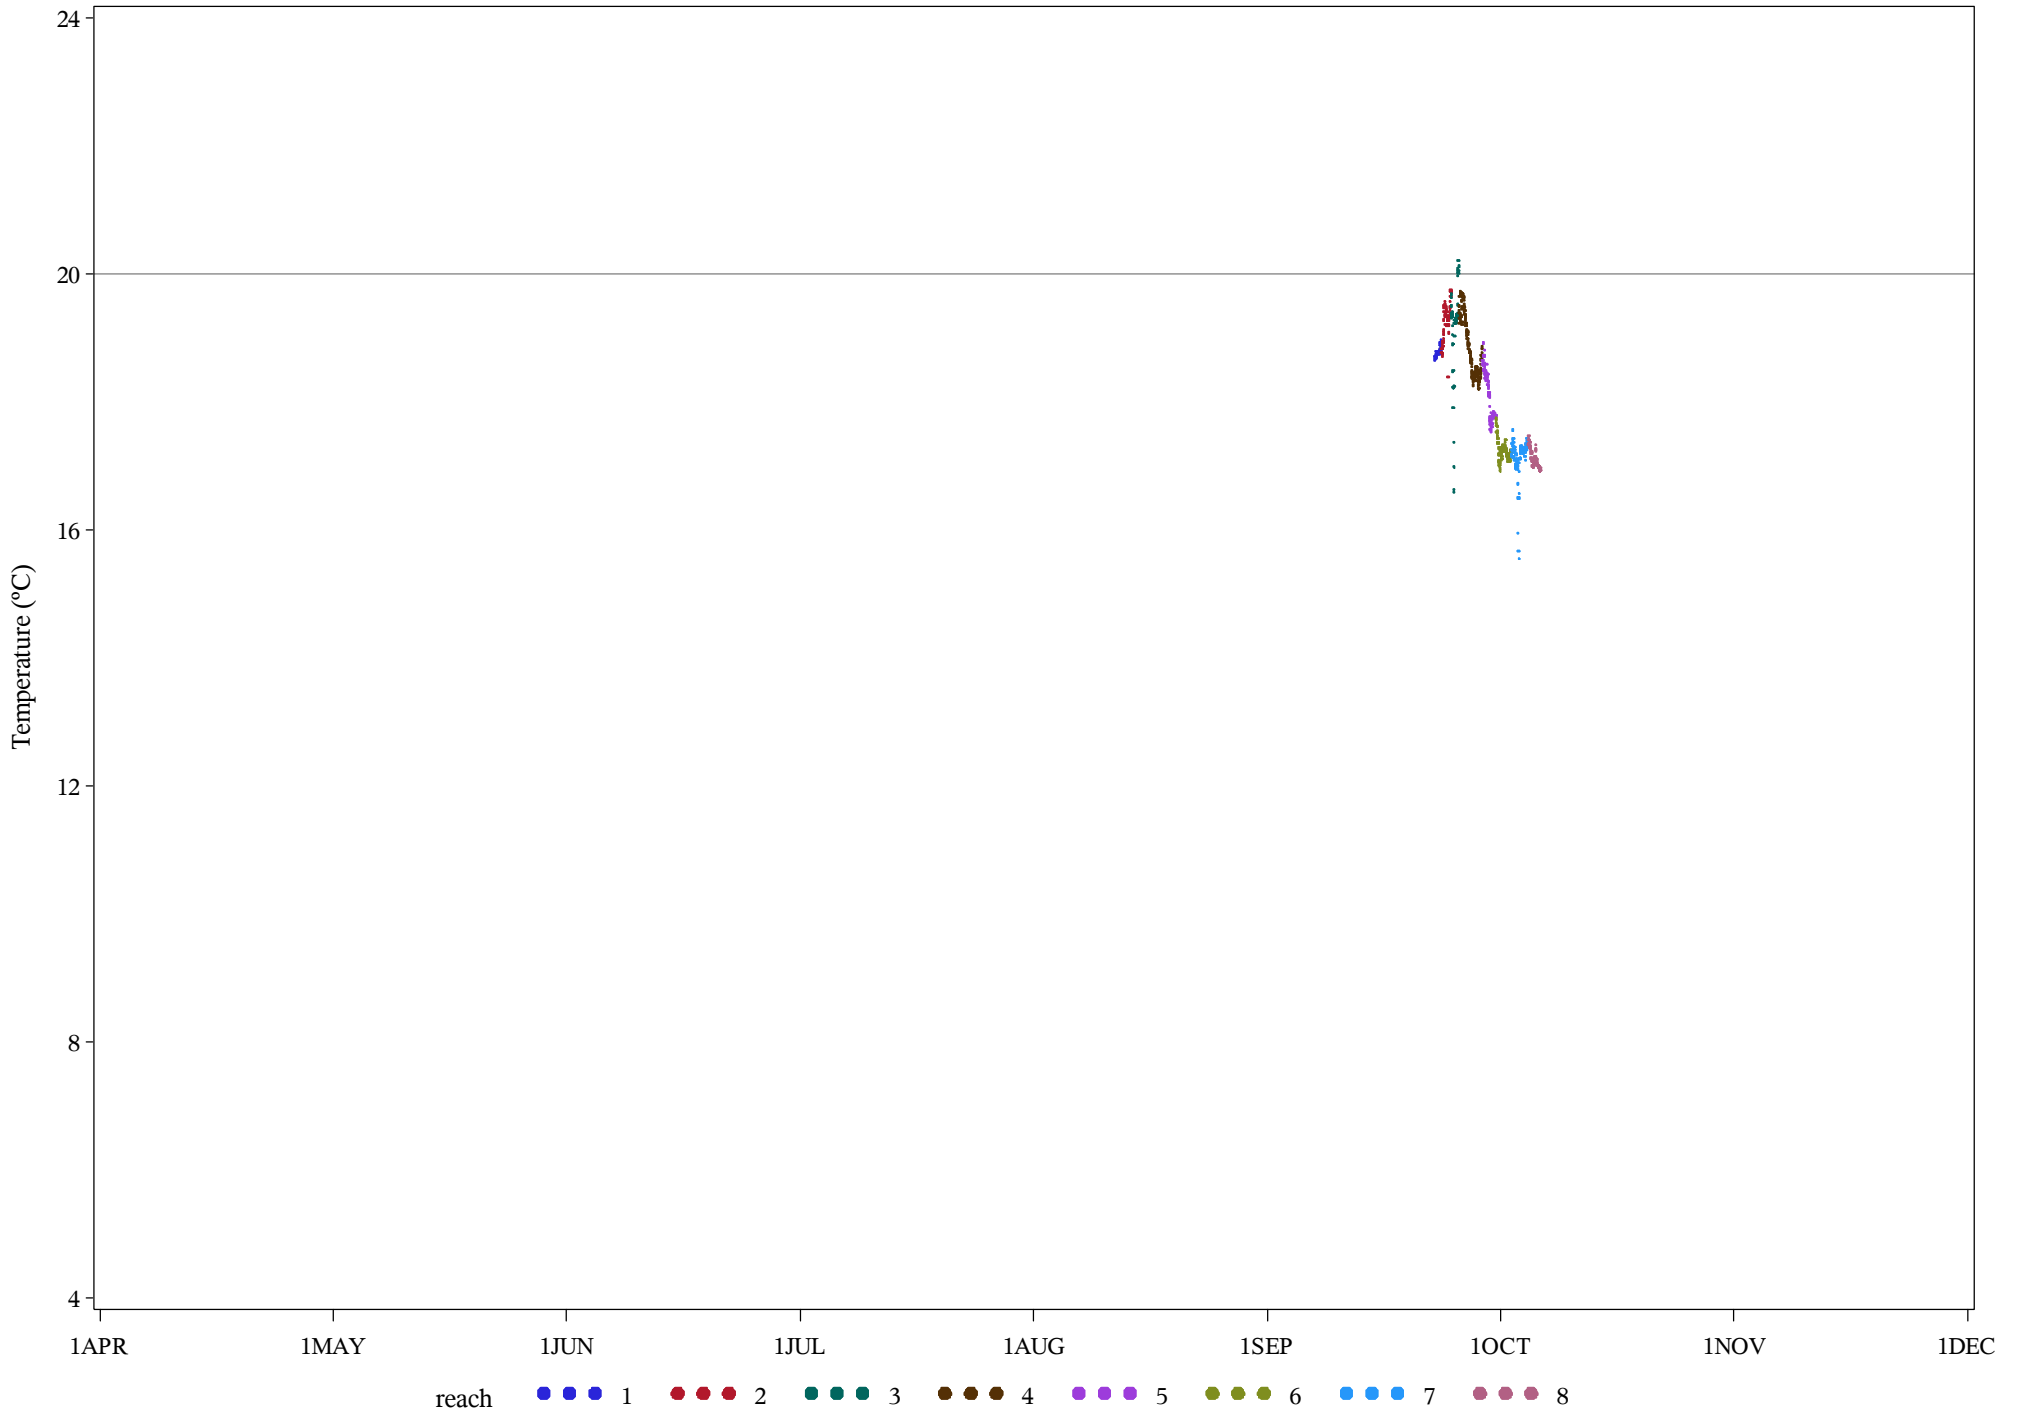







# Fall Chinook 4879B

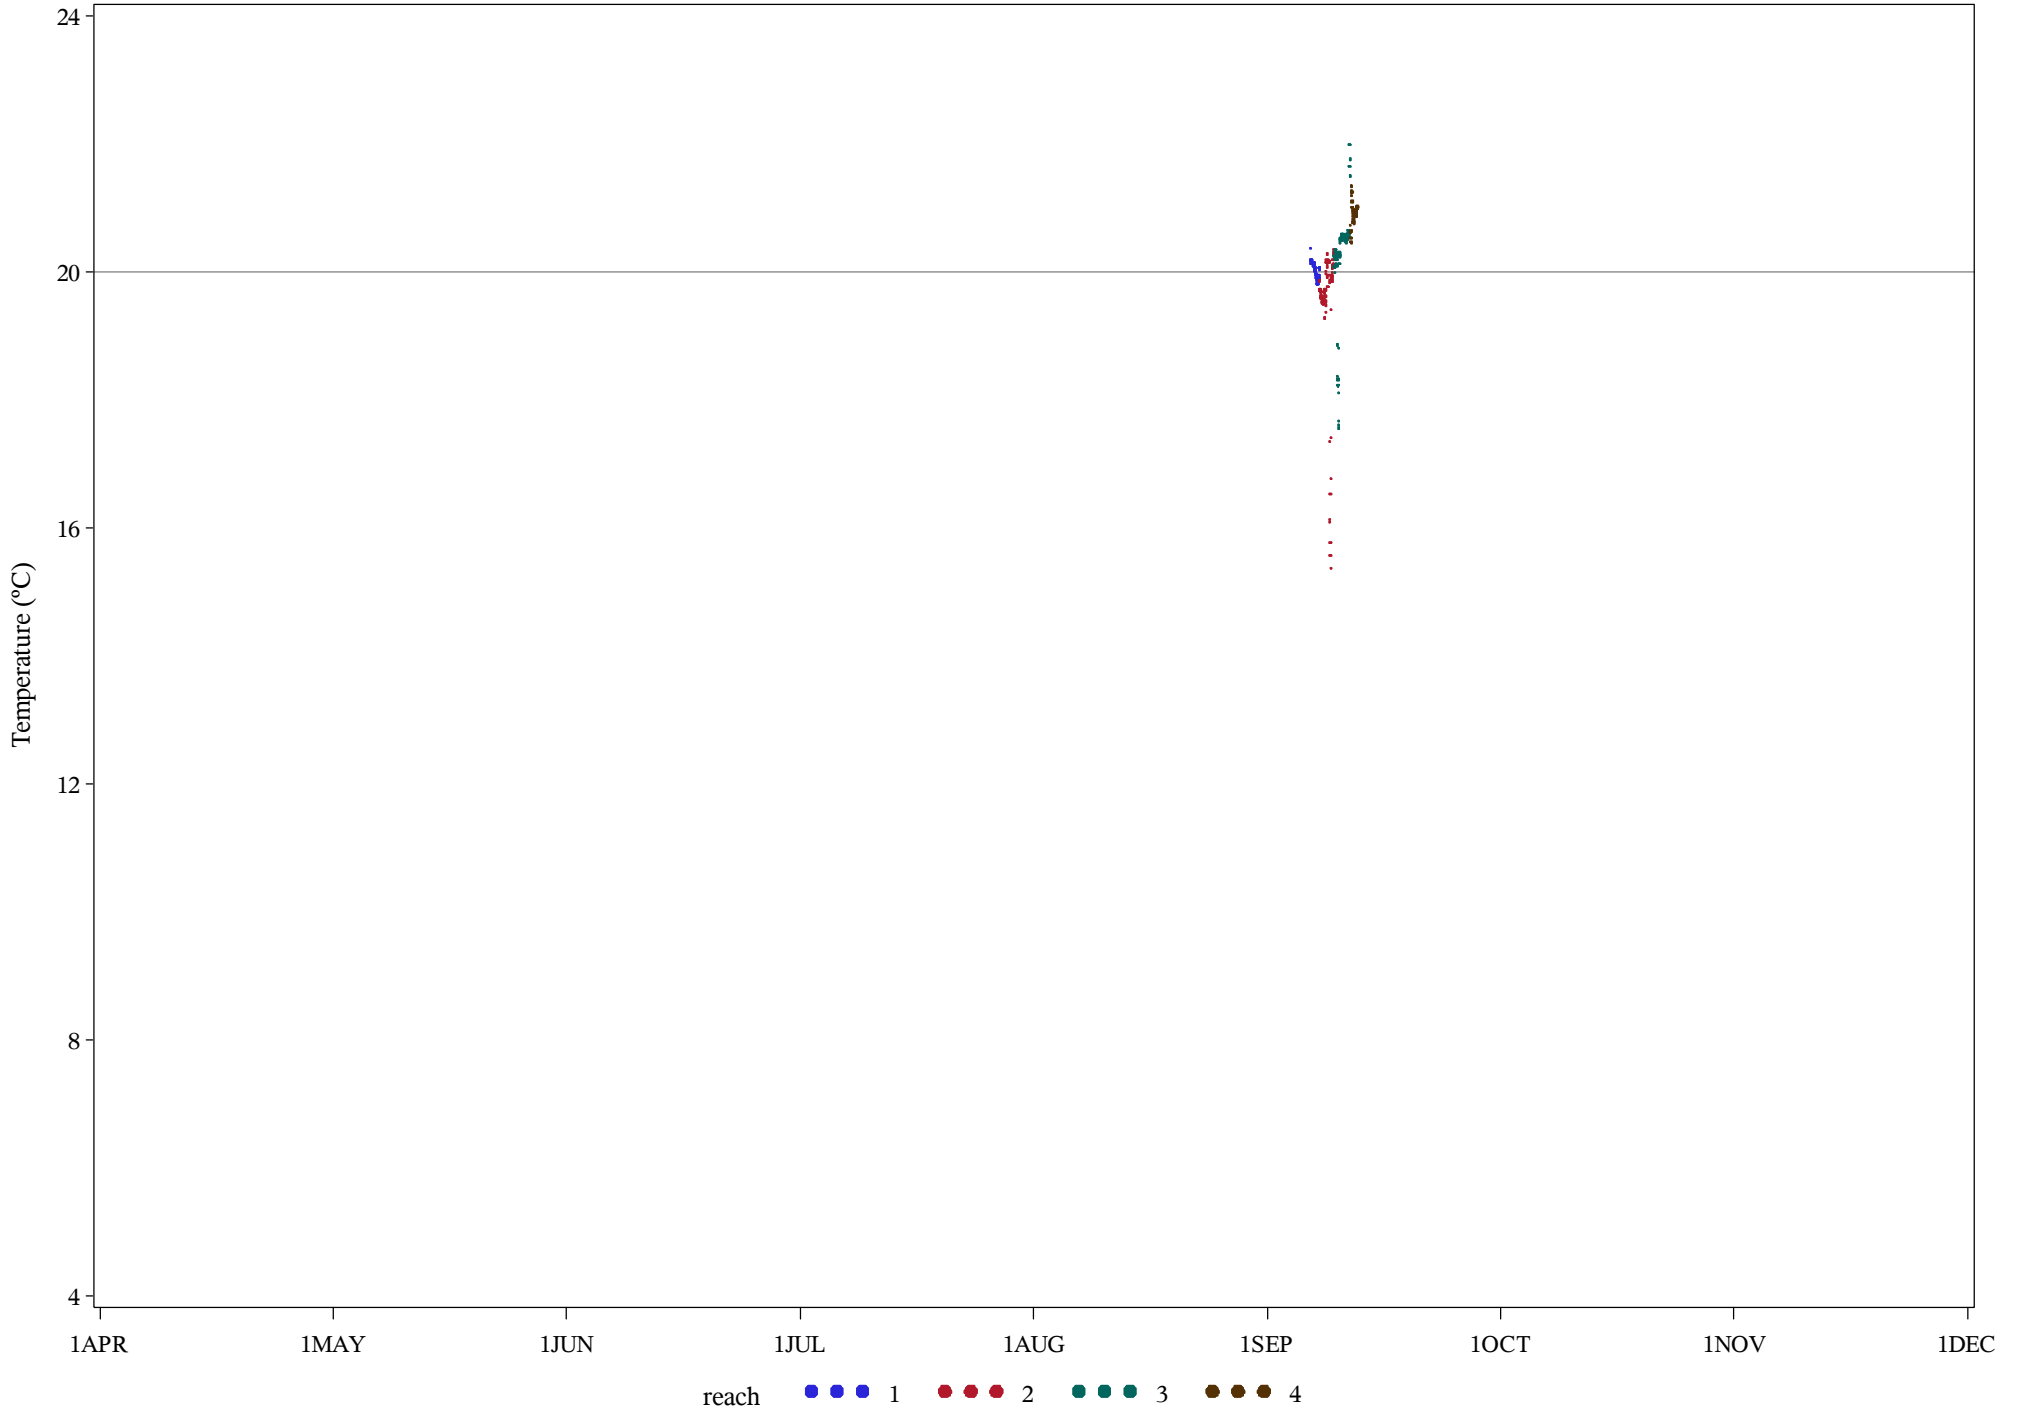

# Fall Chinook 4889B

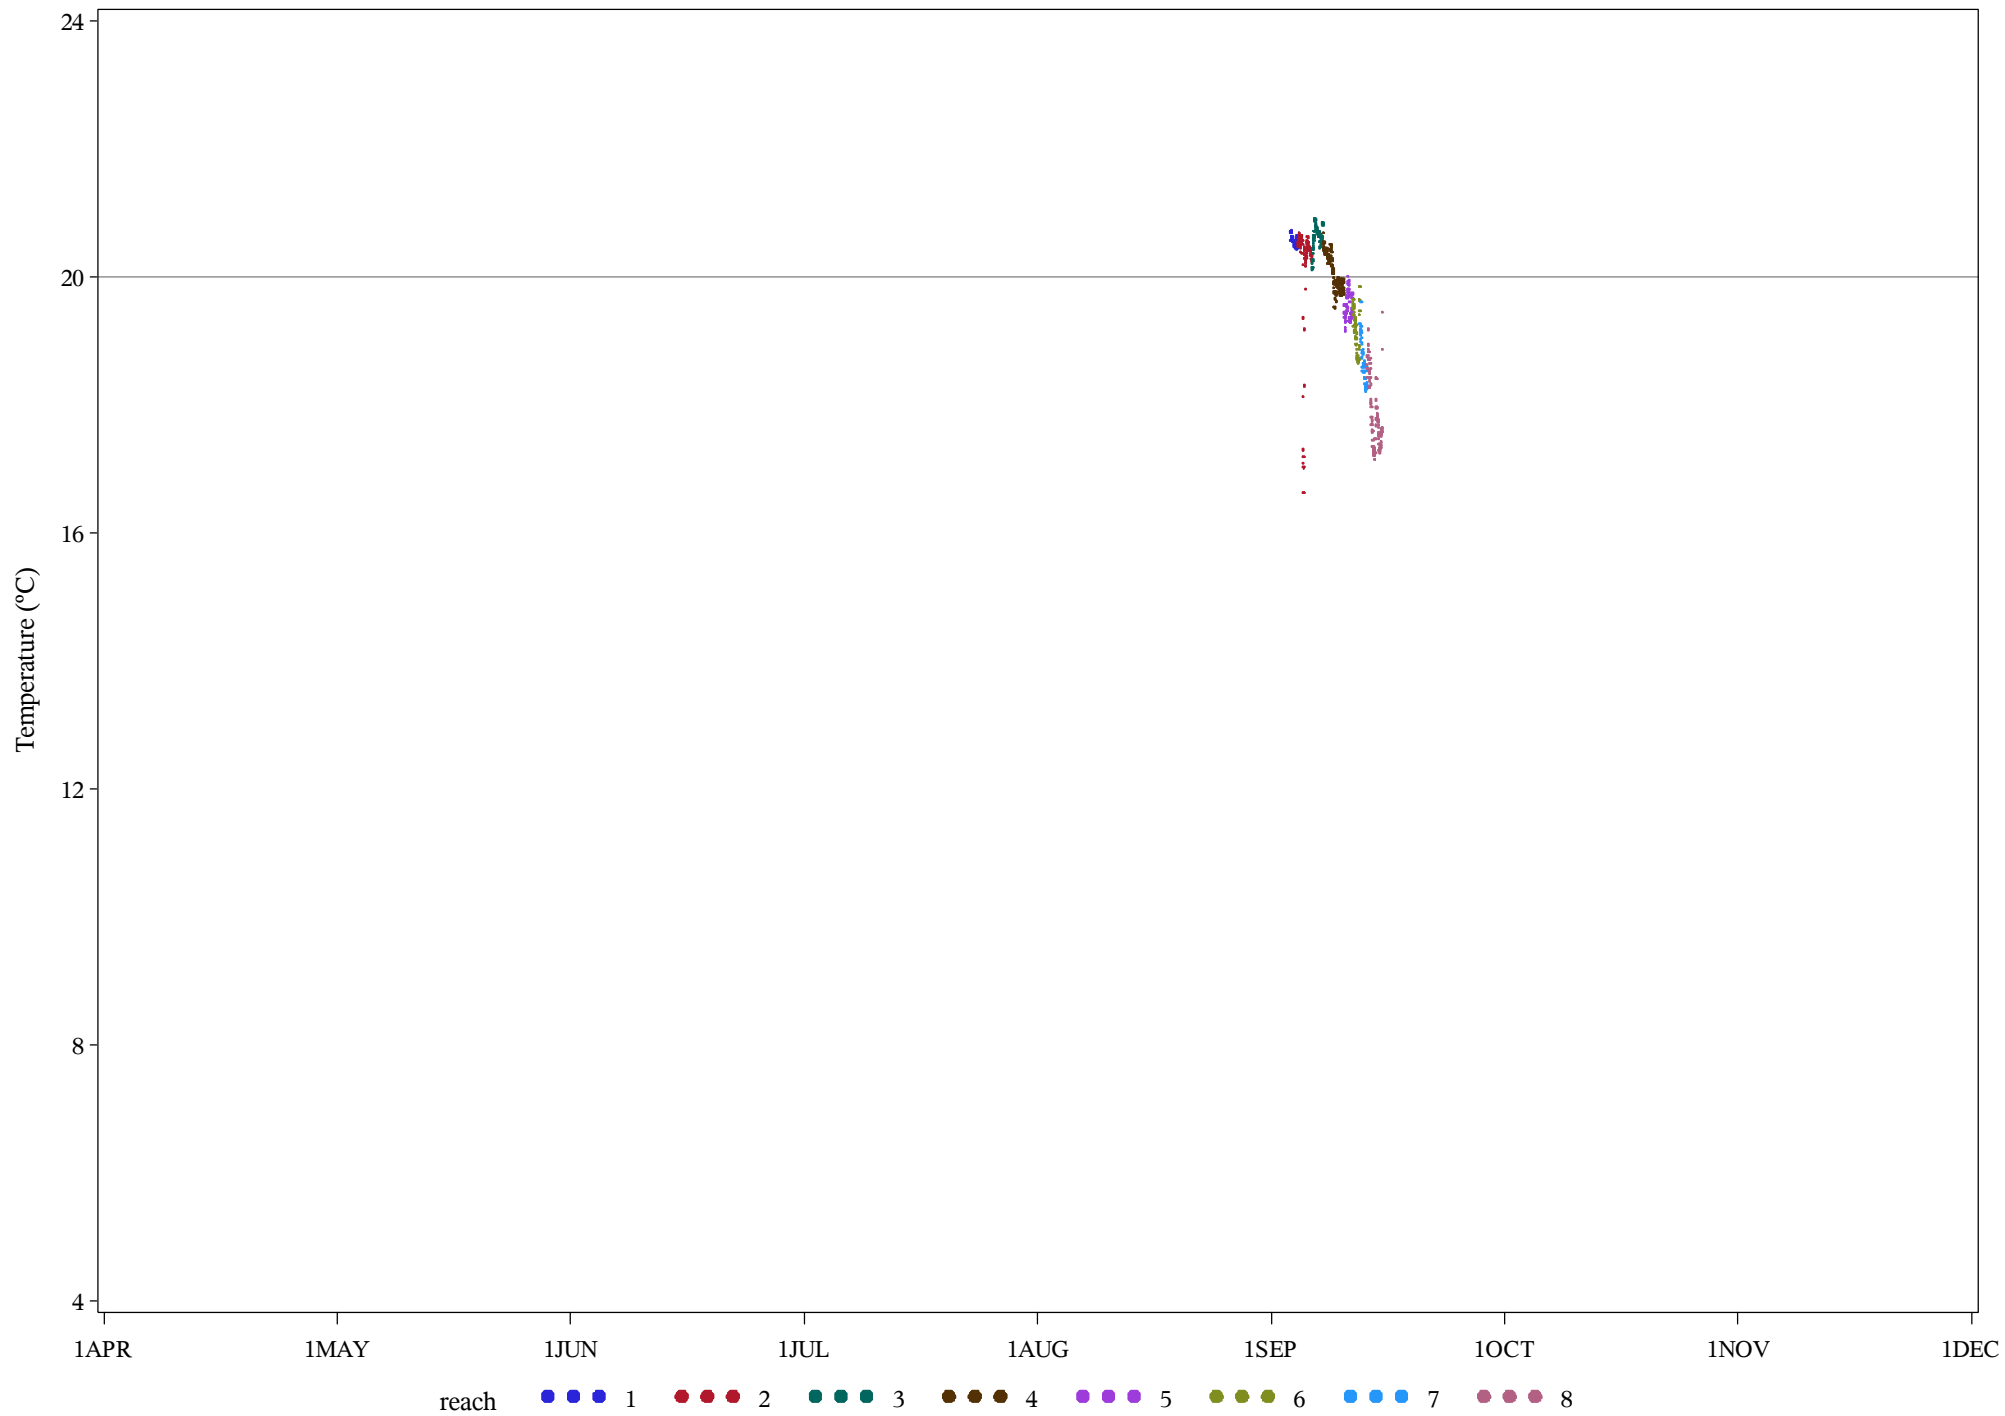

# Fall Chinook 4912B

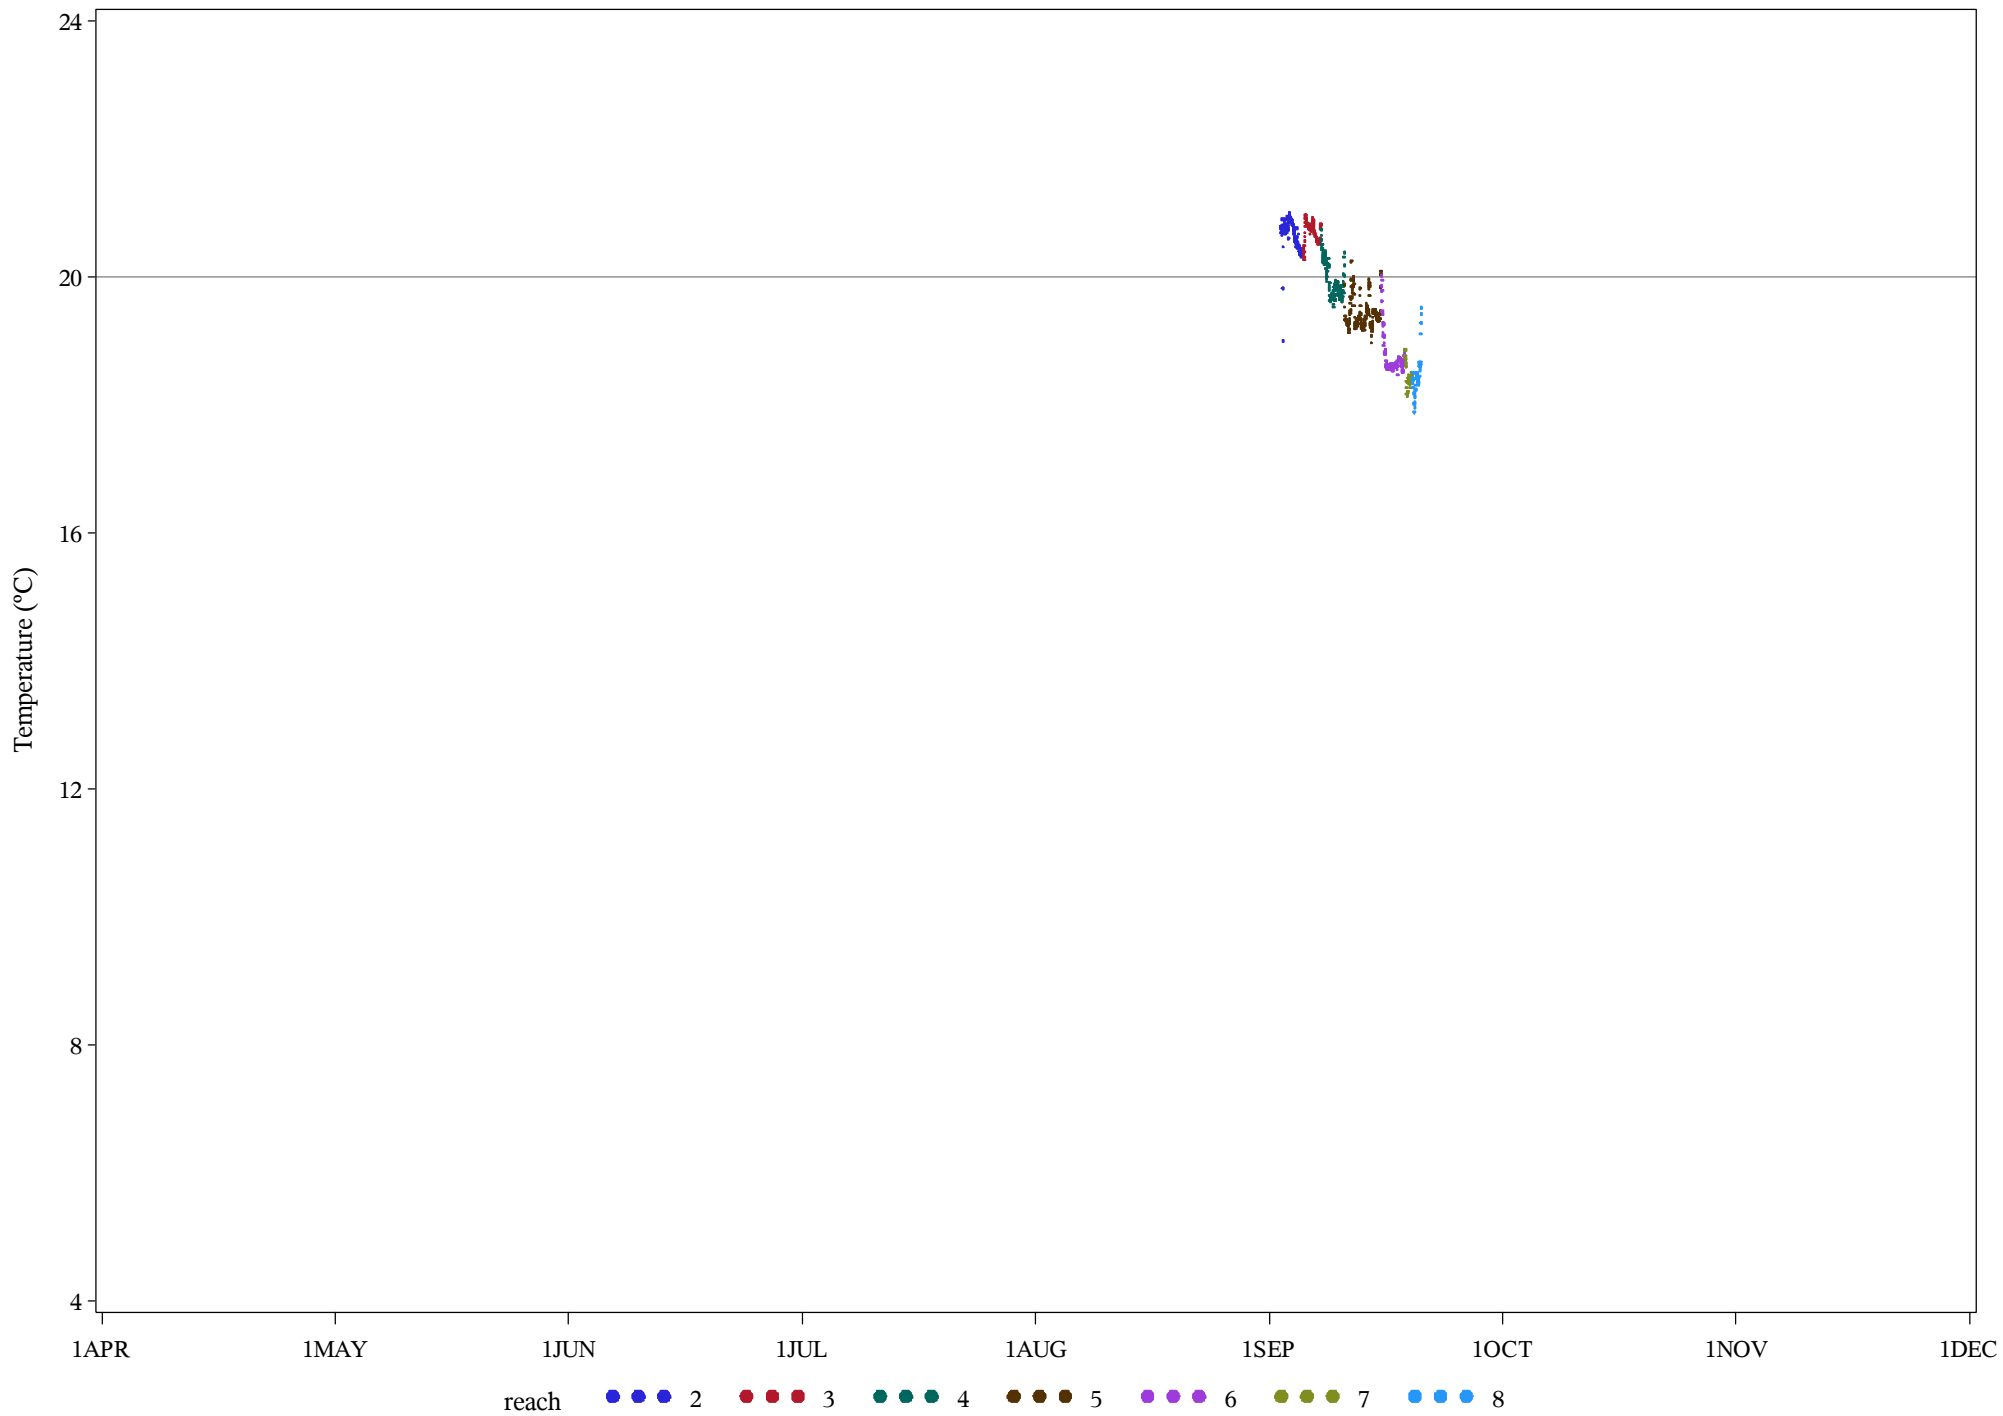

# Fall Chinook 4972B

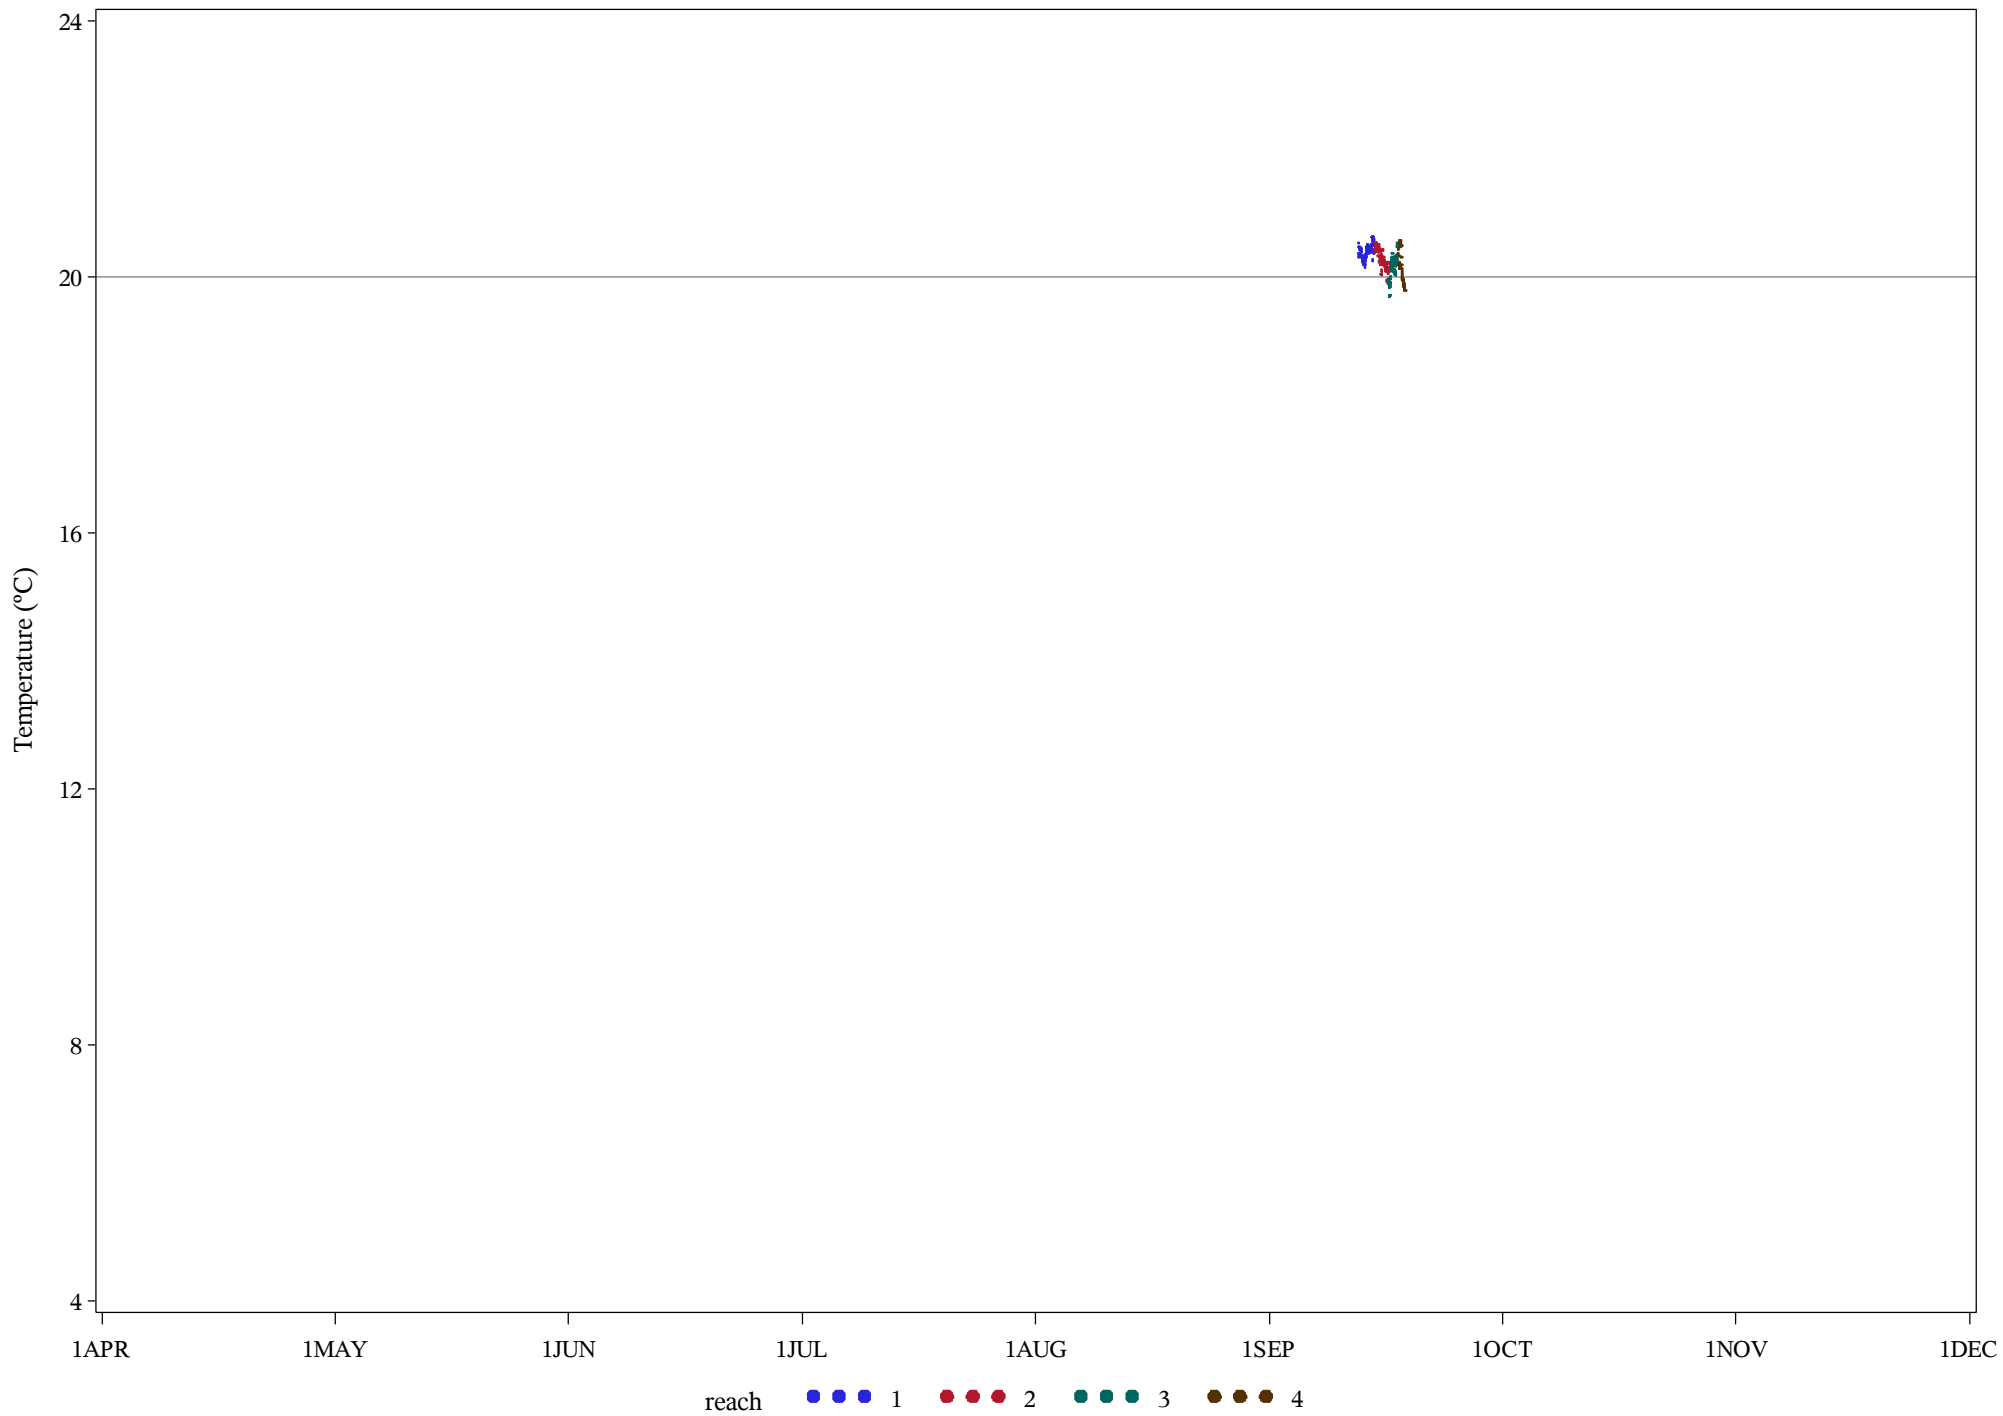





# Spring Chinook 2660A

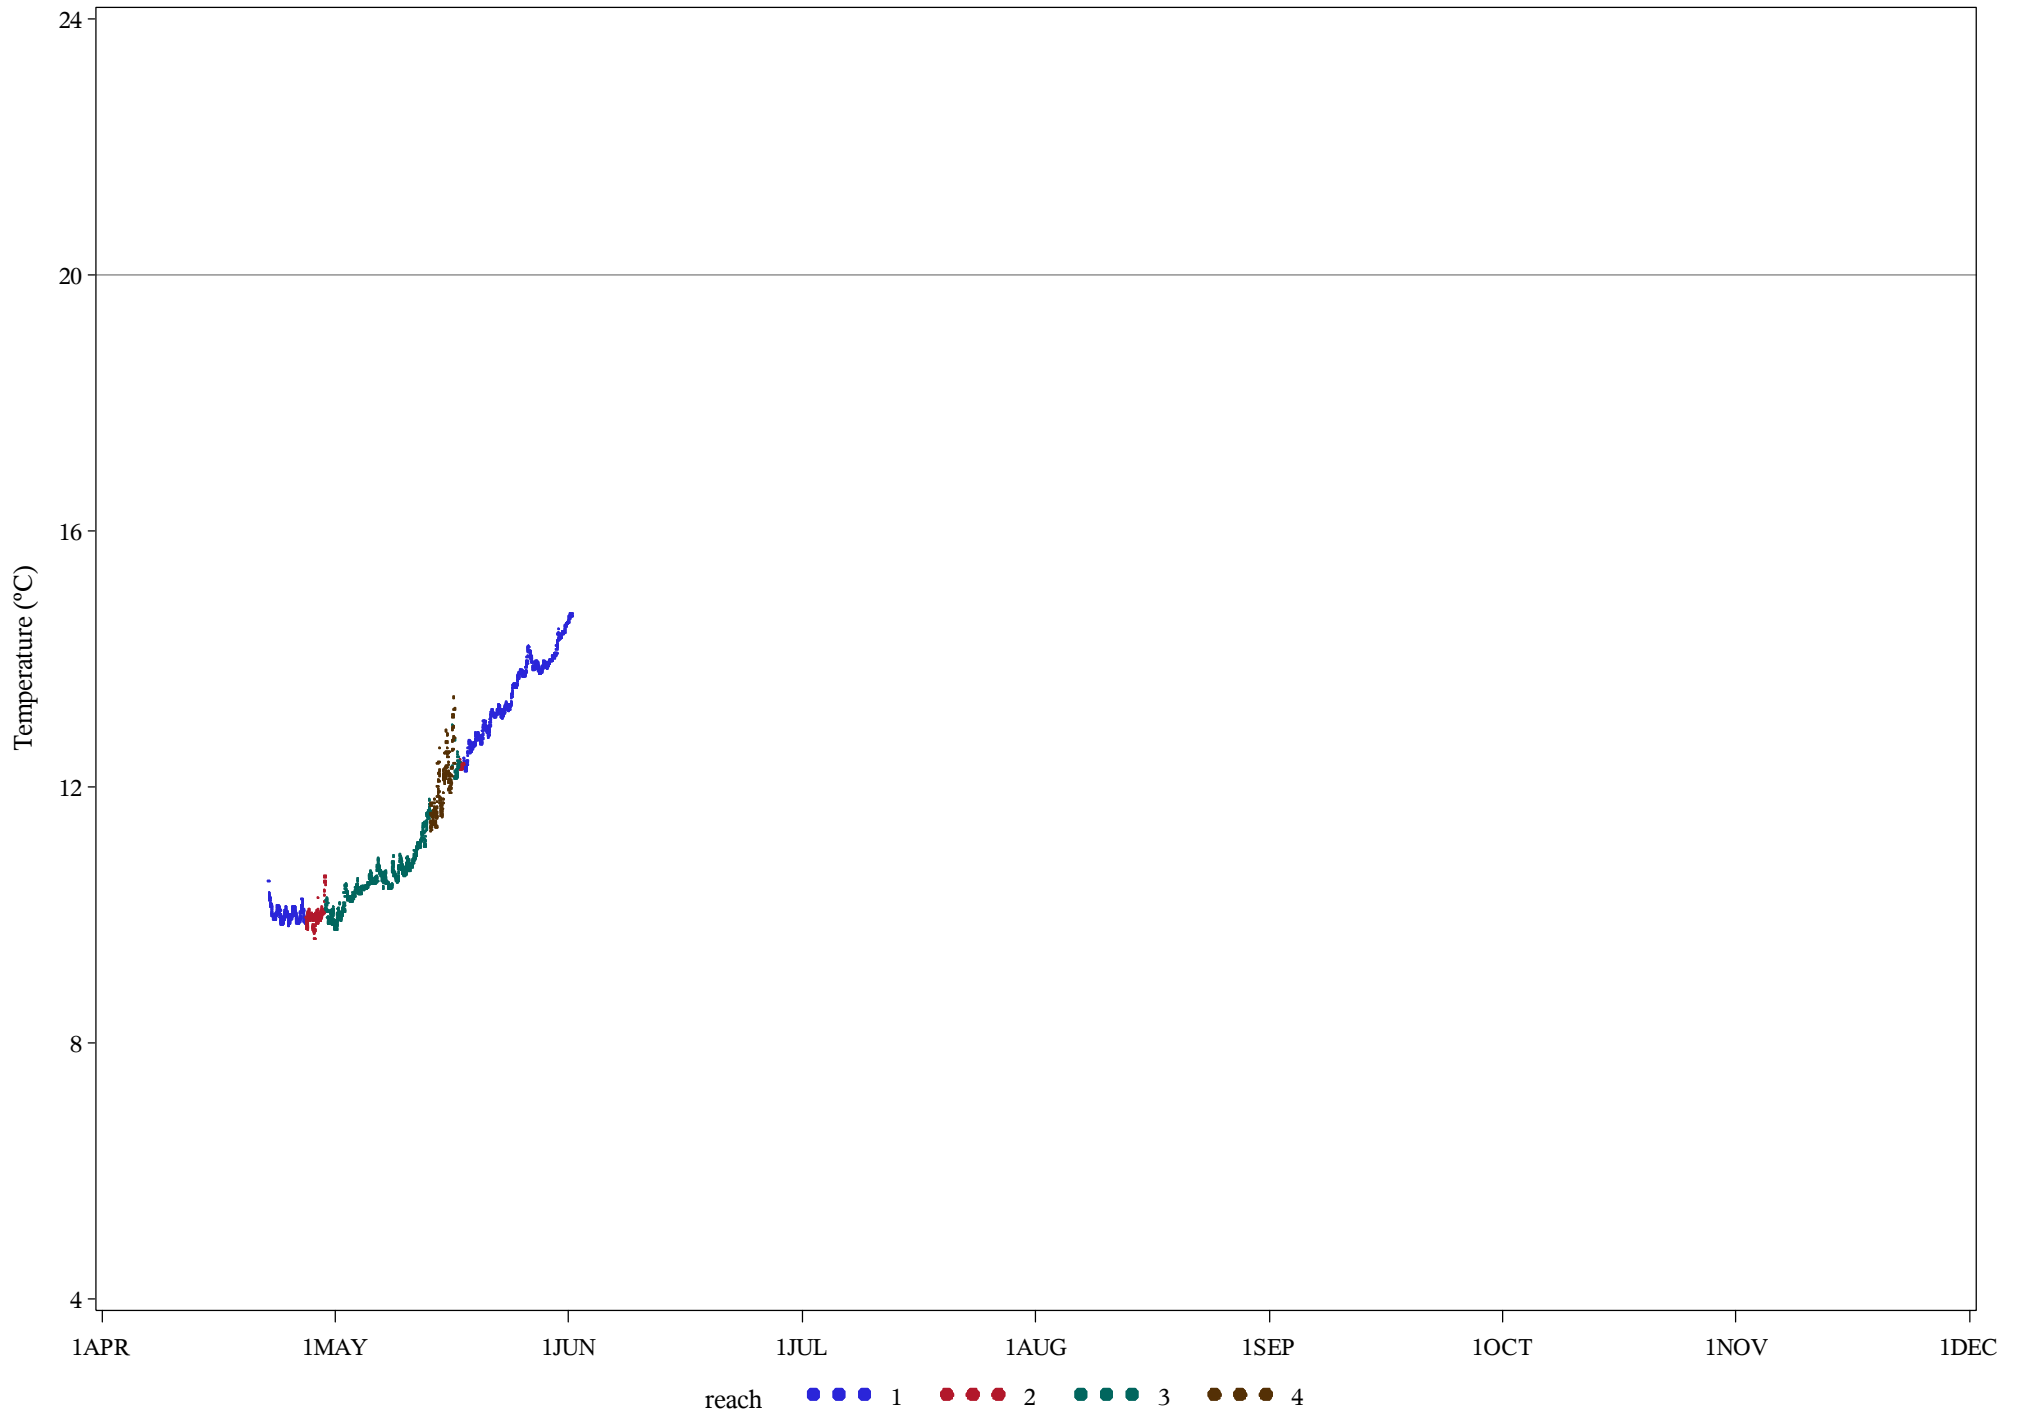









# Spring Chinook 2806A

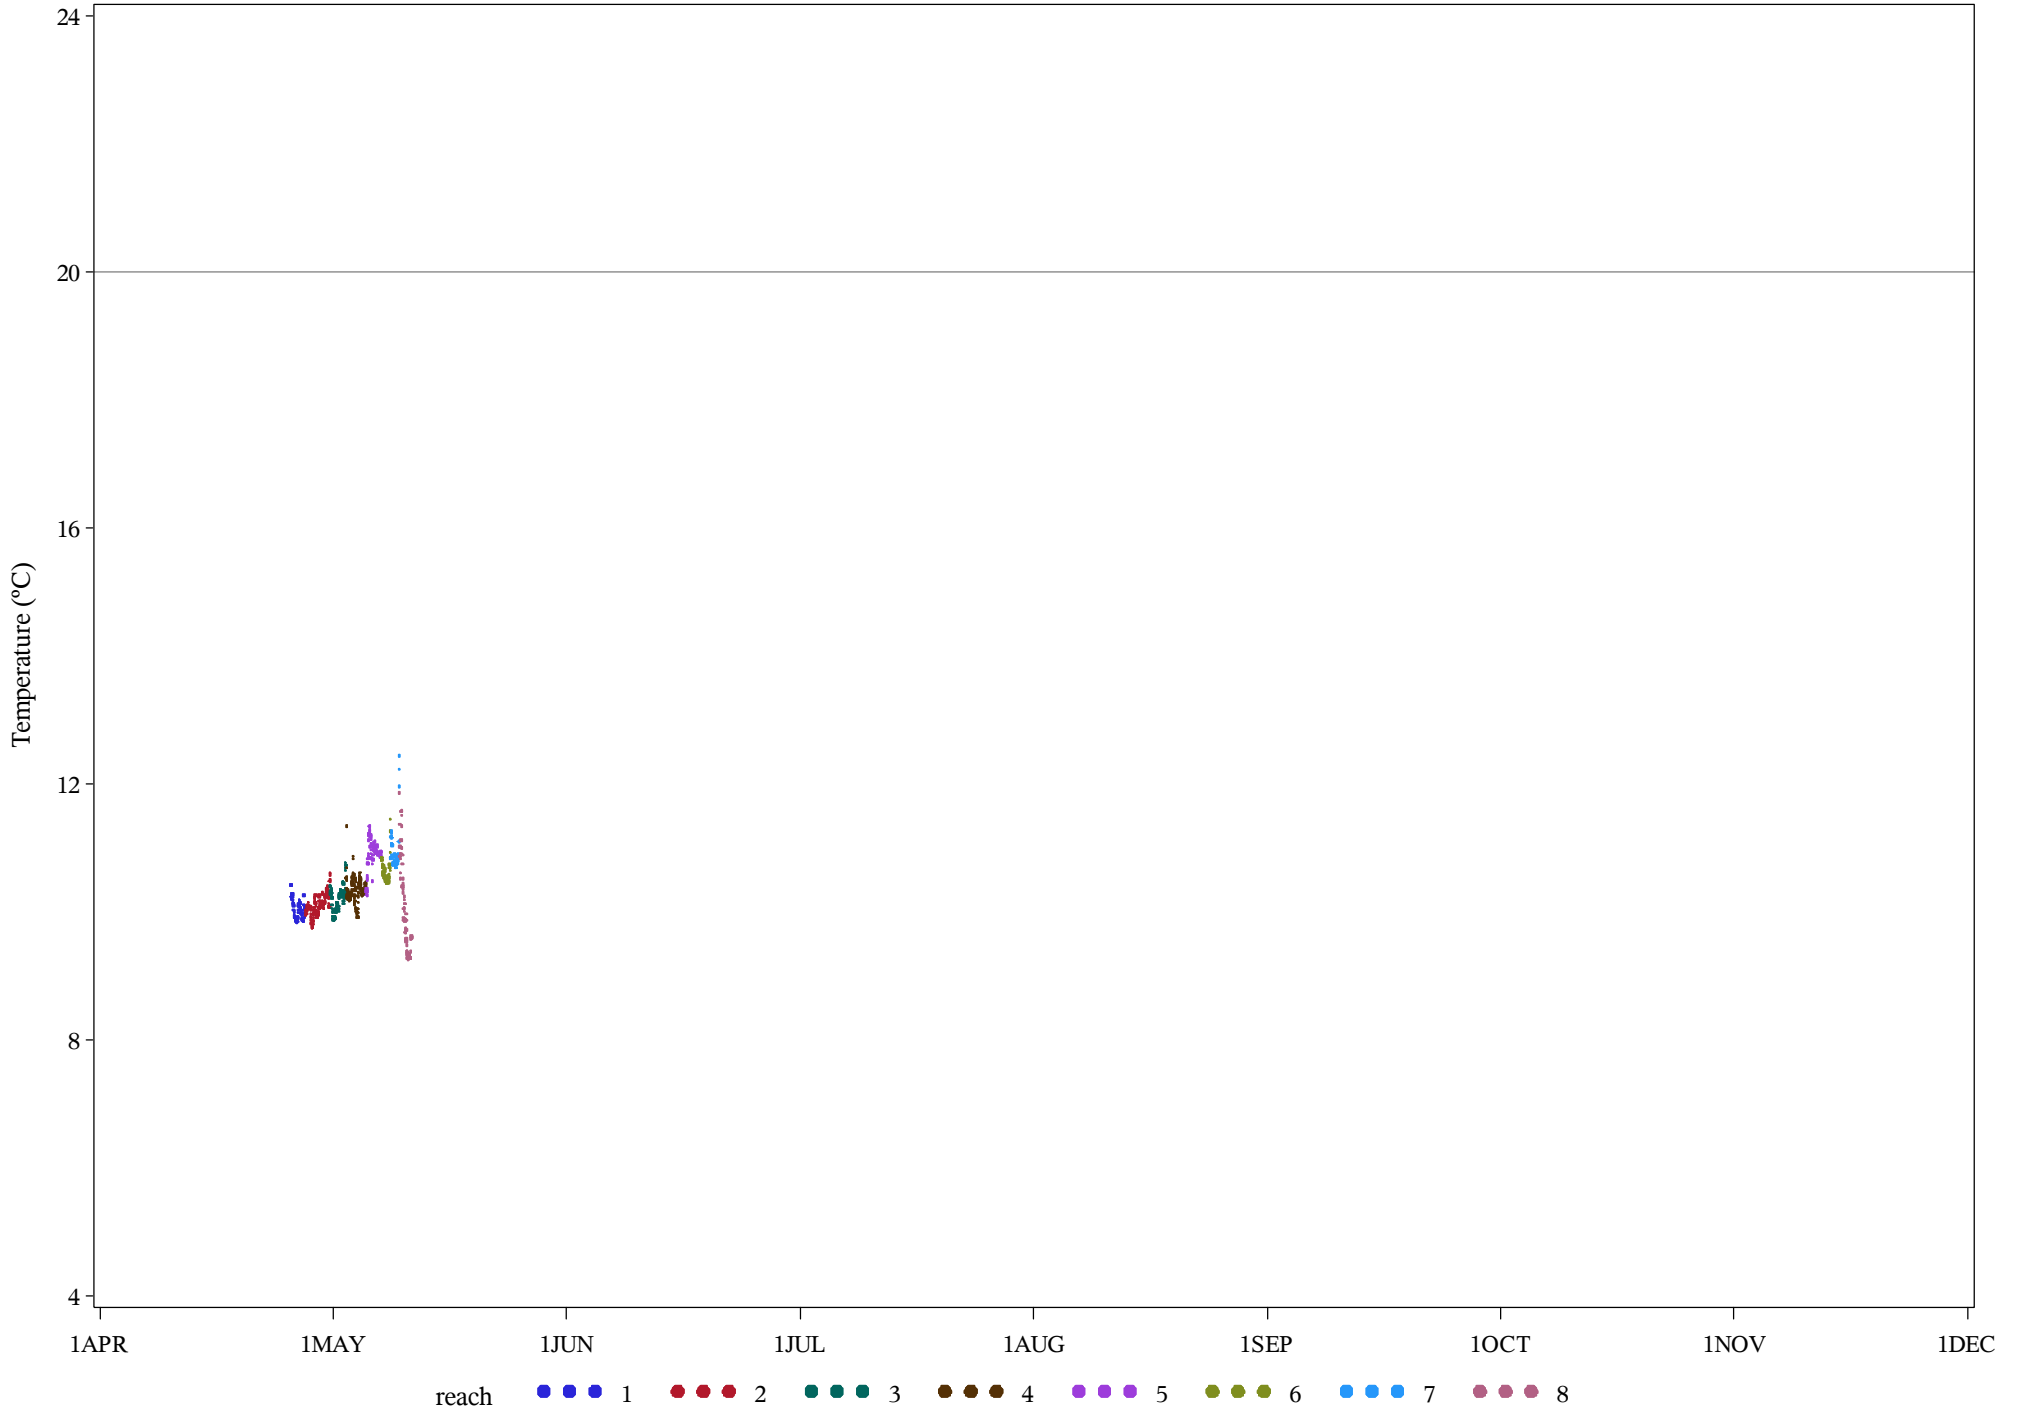



# Spring Chinook 2976A

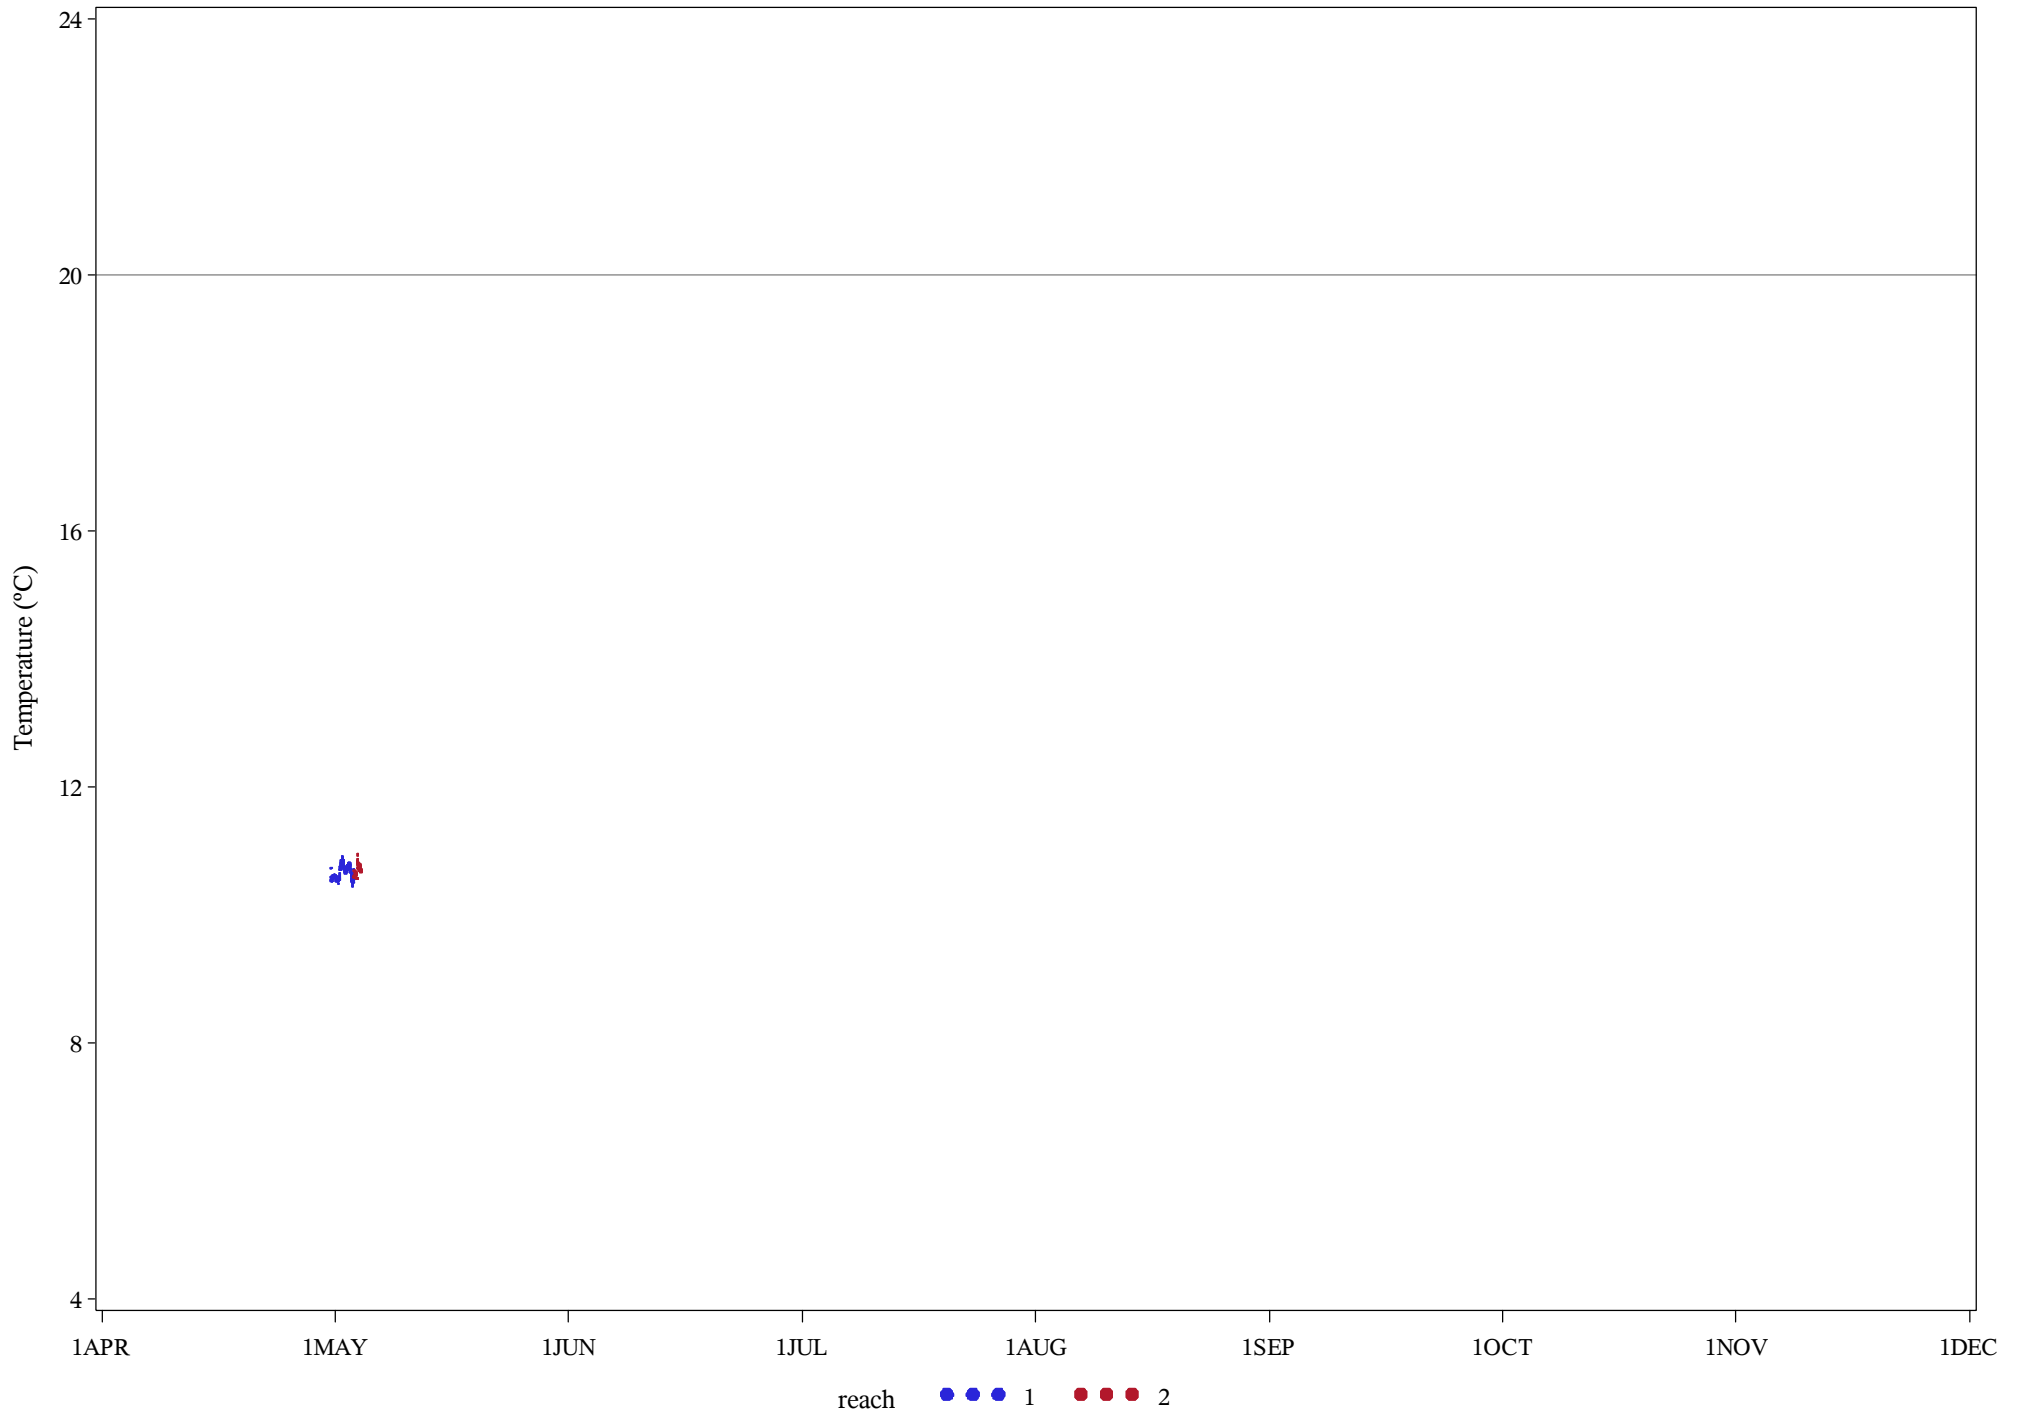

# Spring Chinook 2987A

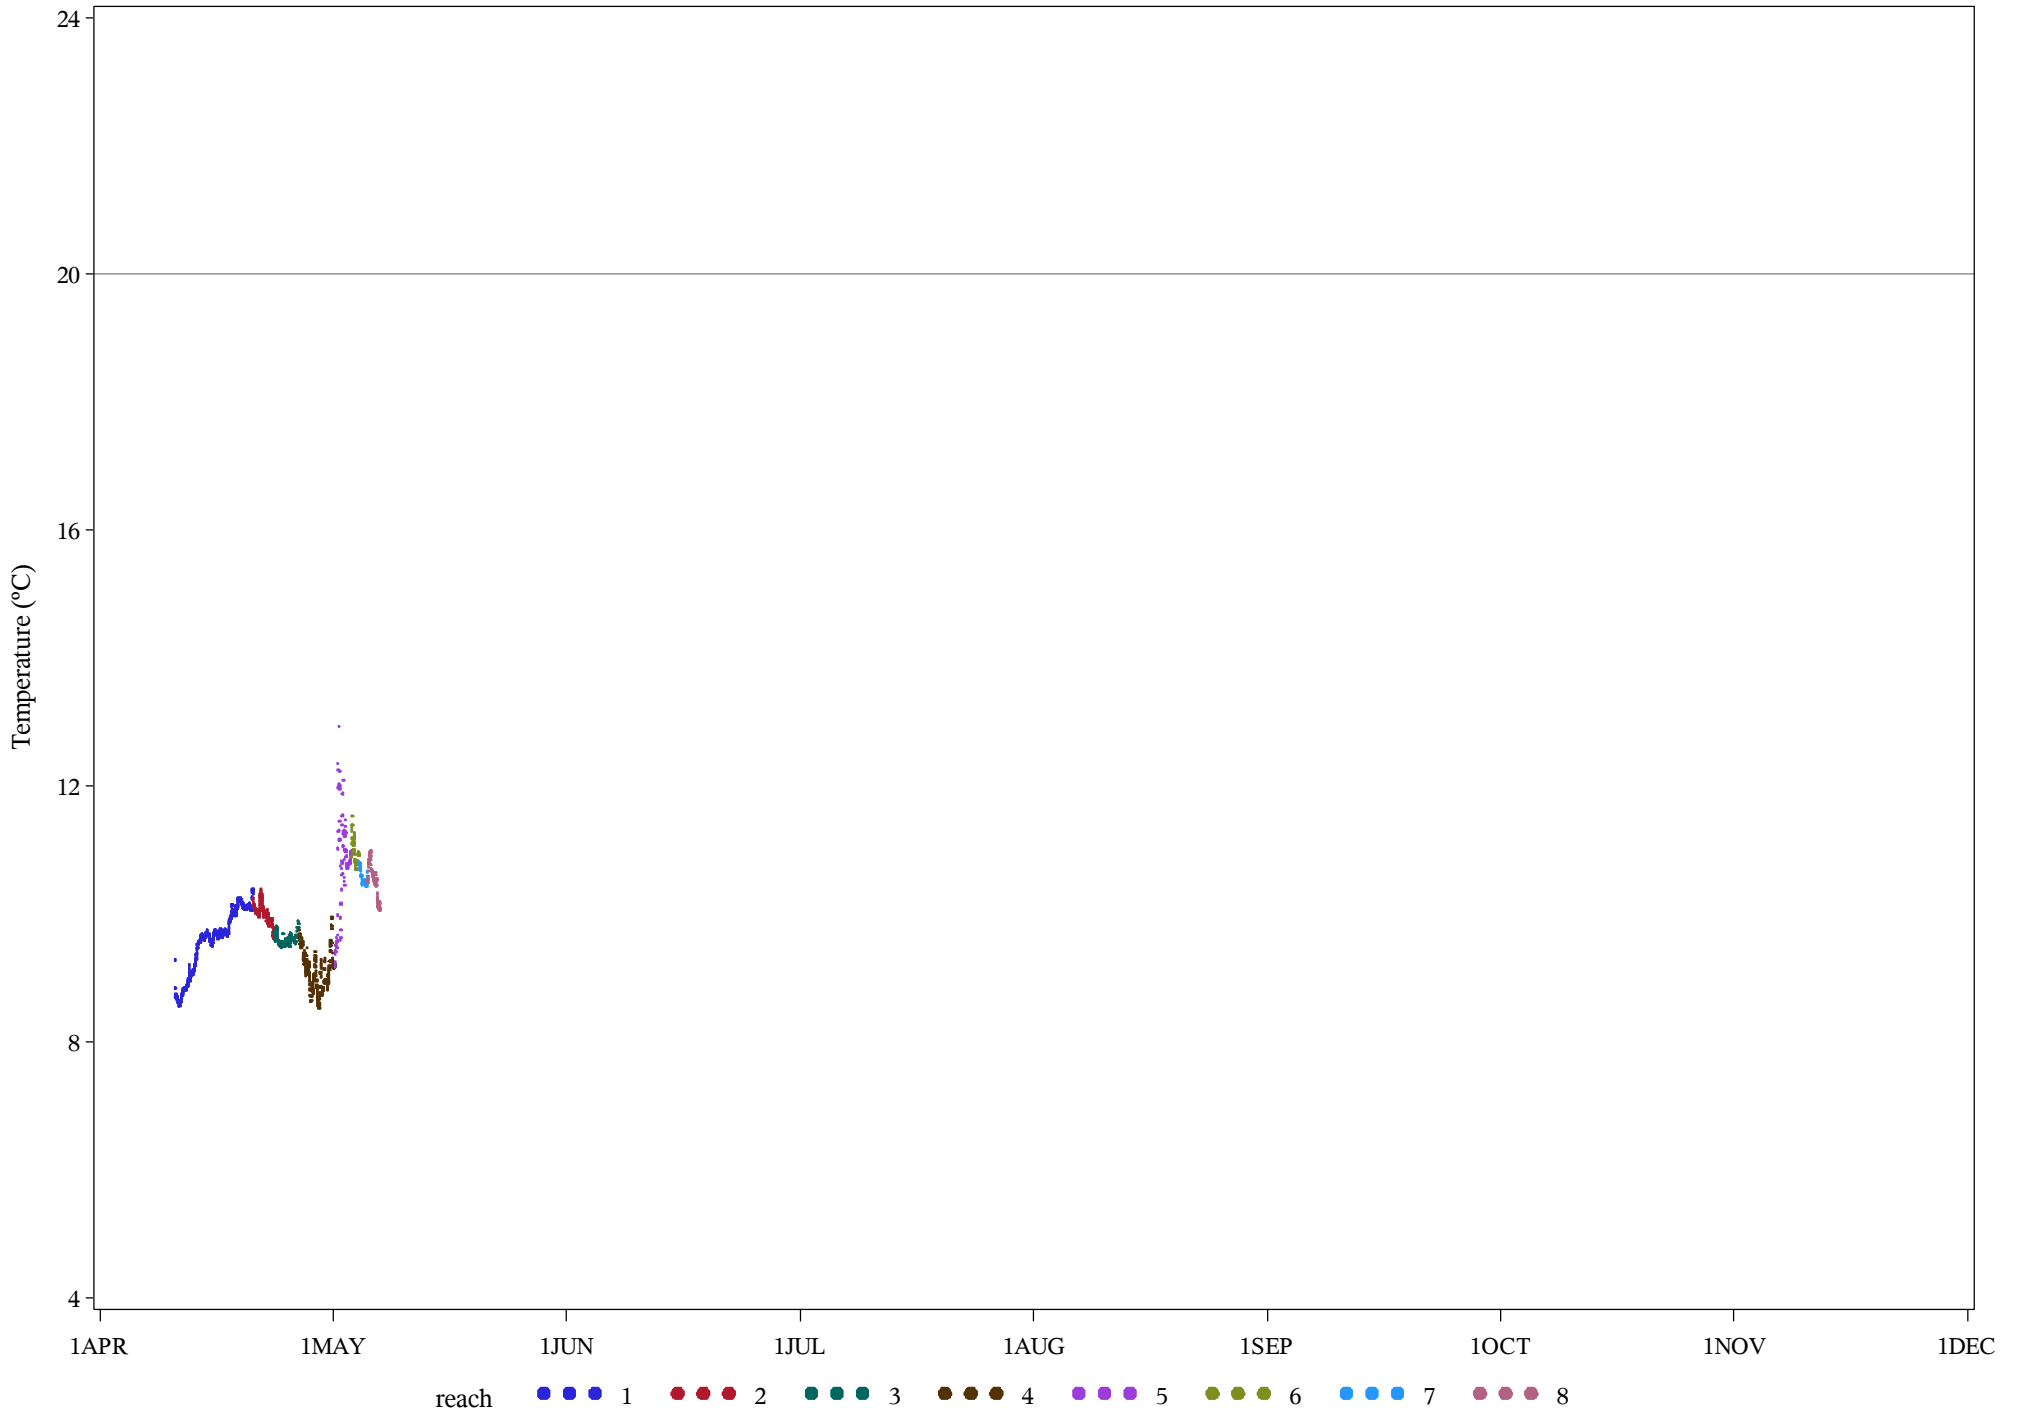



# Spring Chinook 2995A

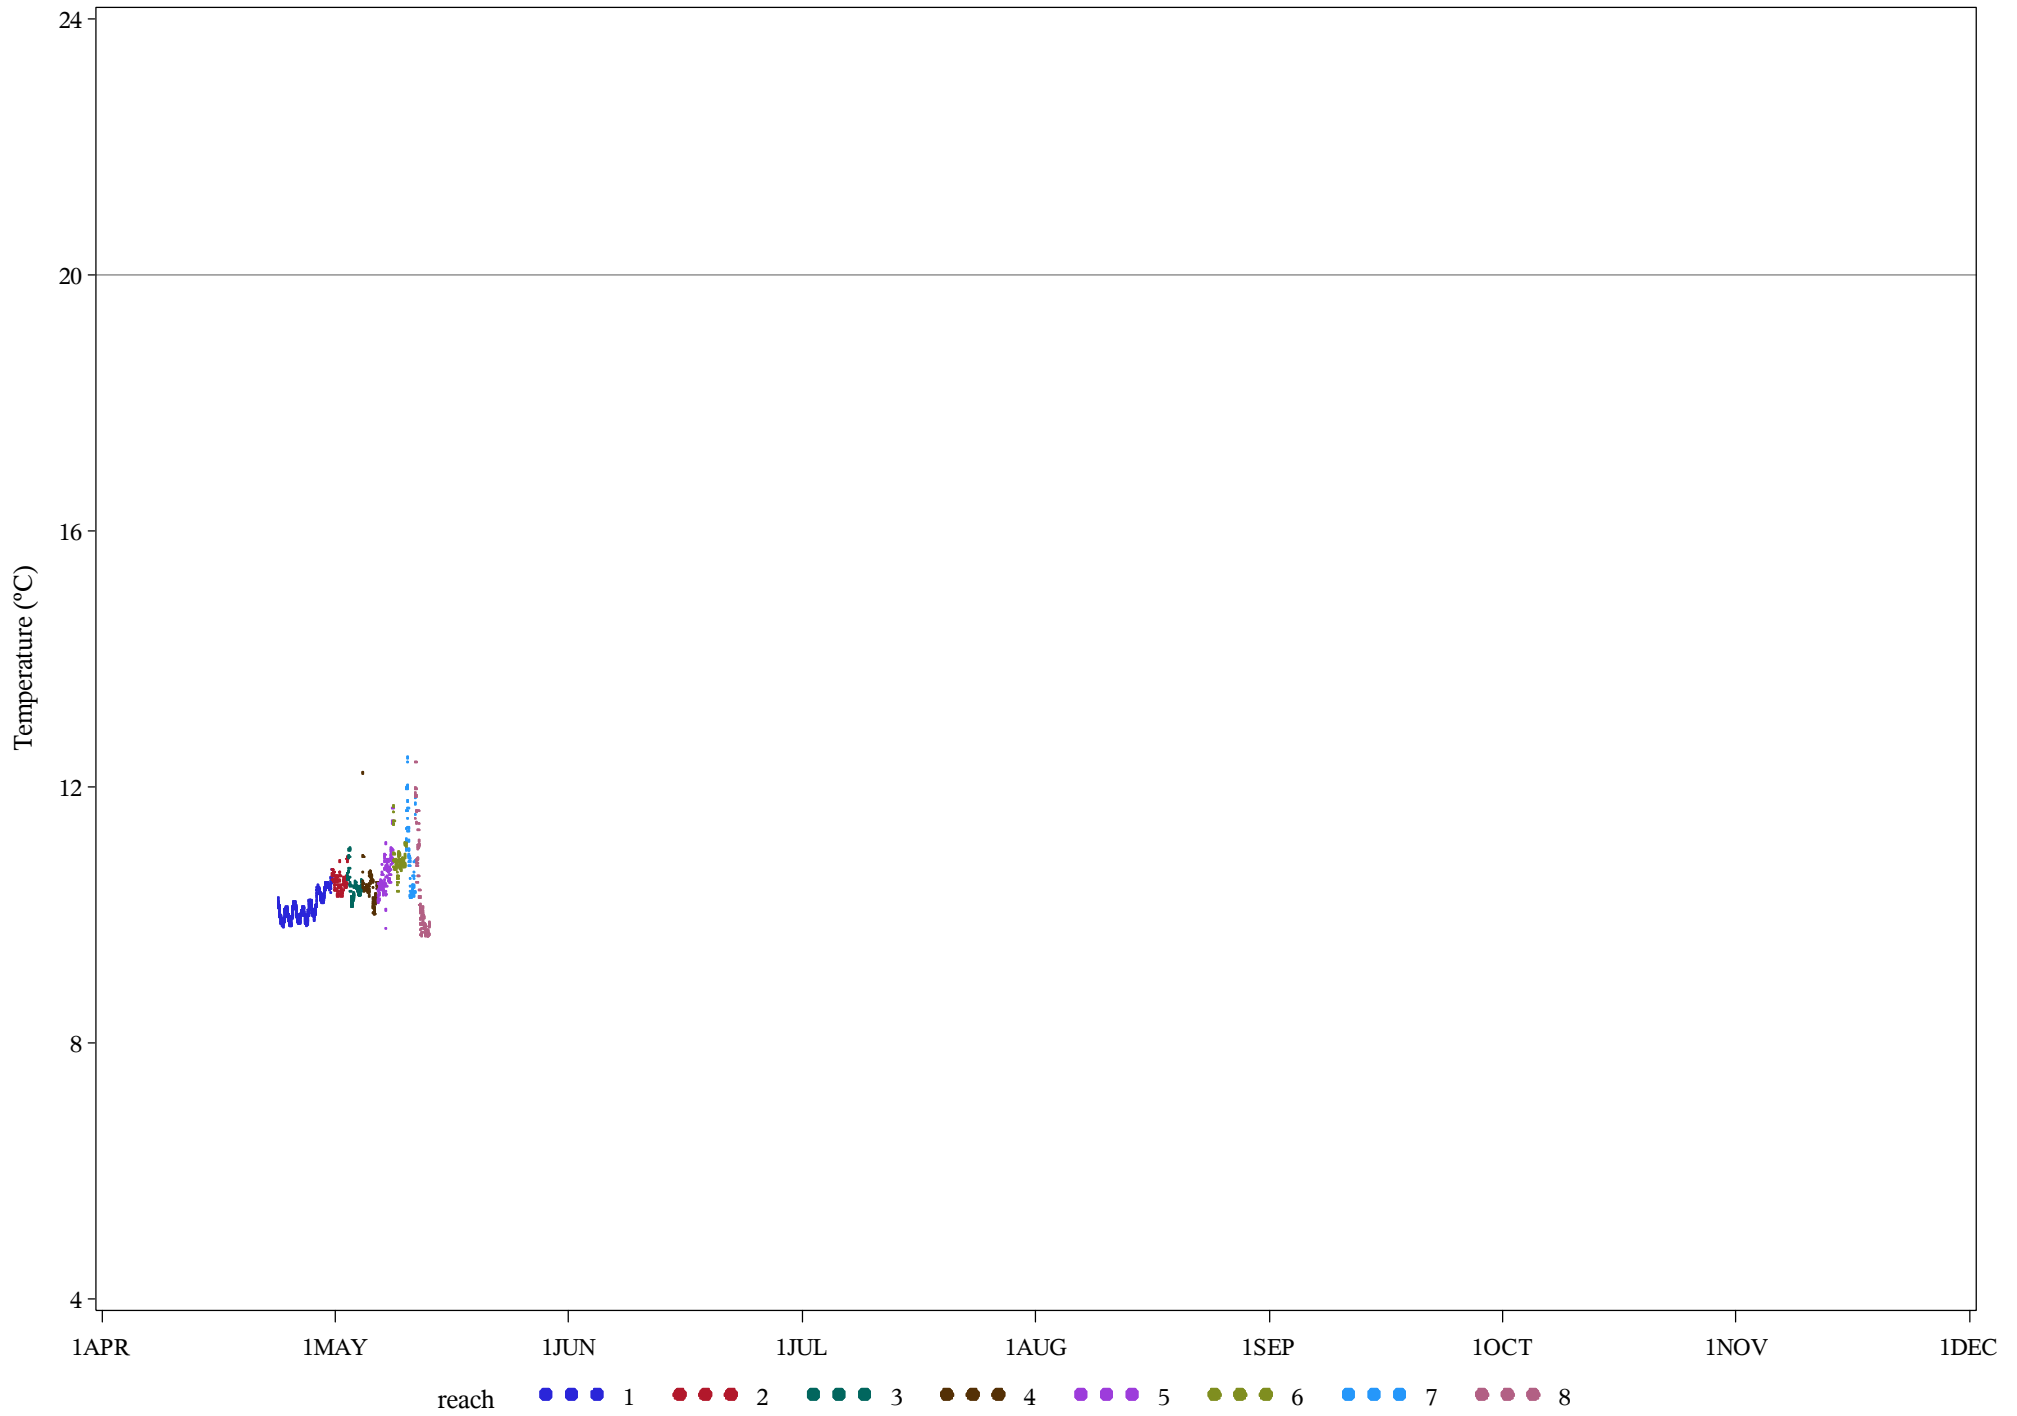



# Spring Chinook 3005A

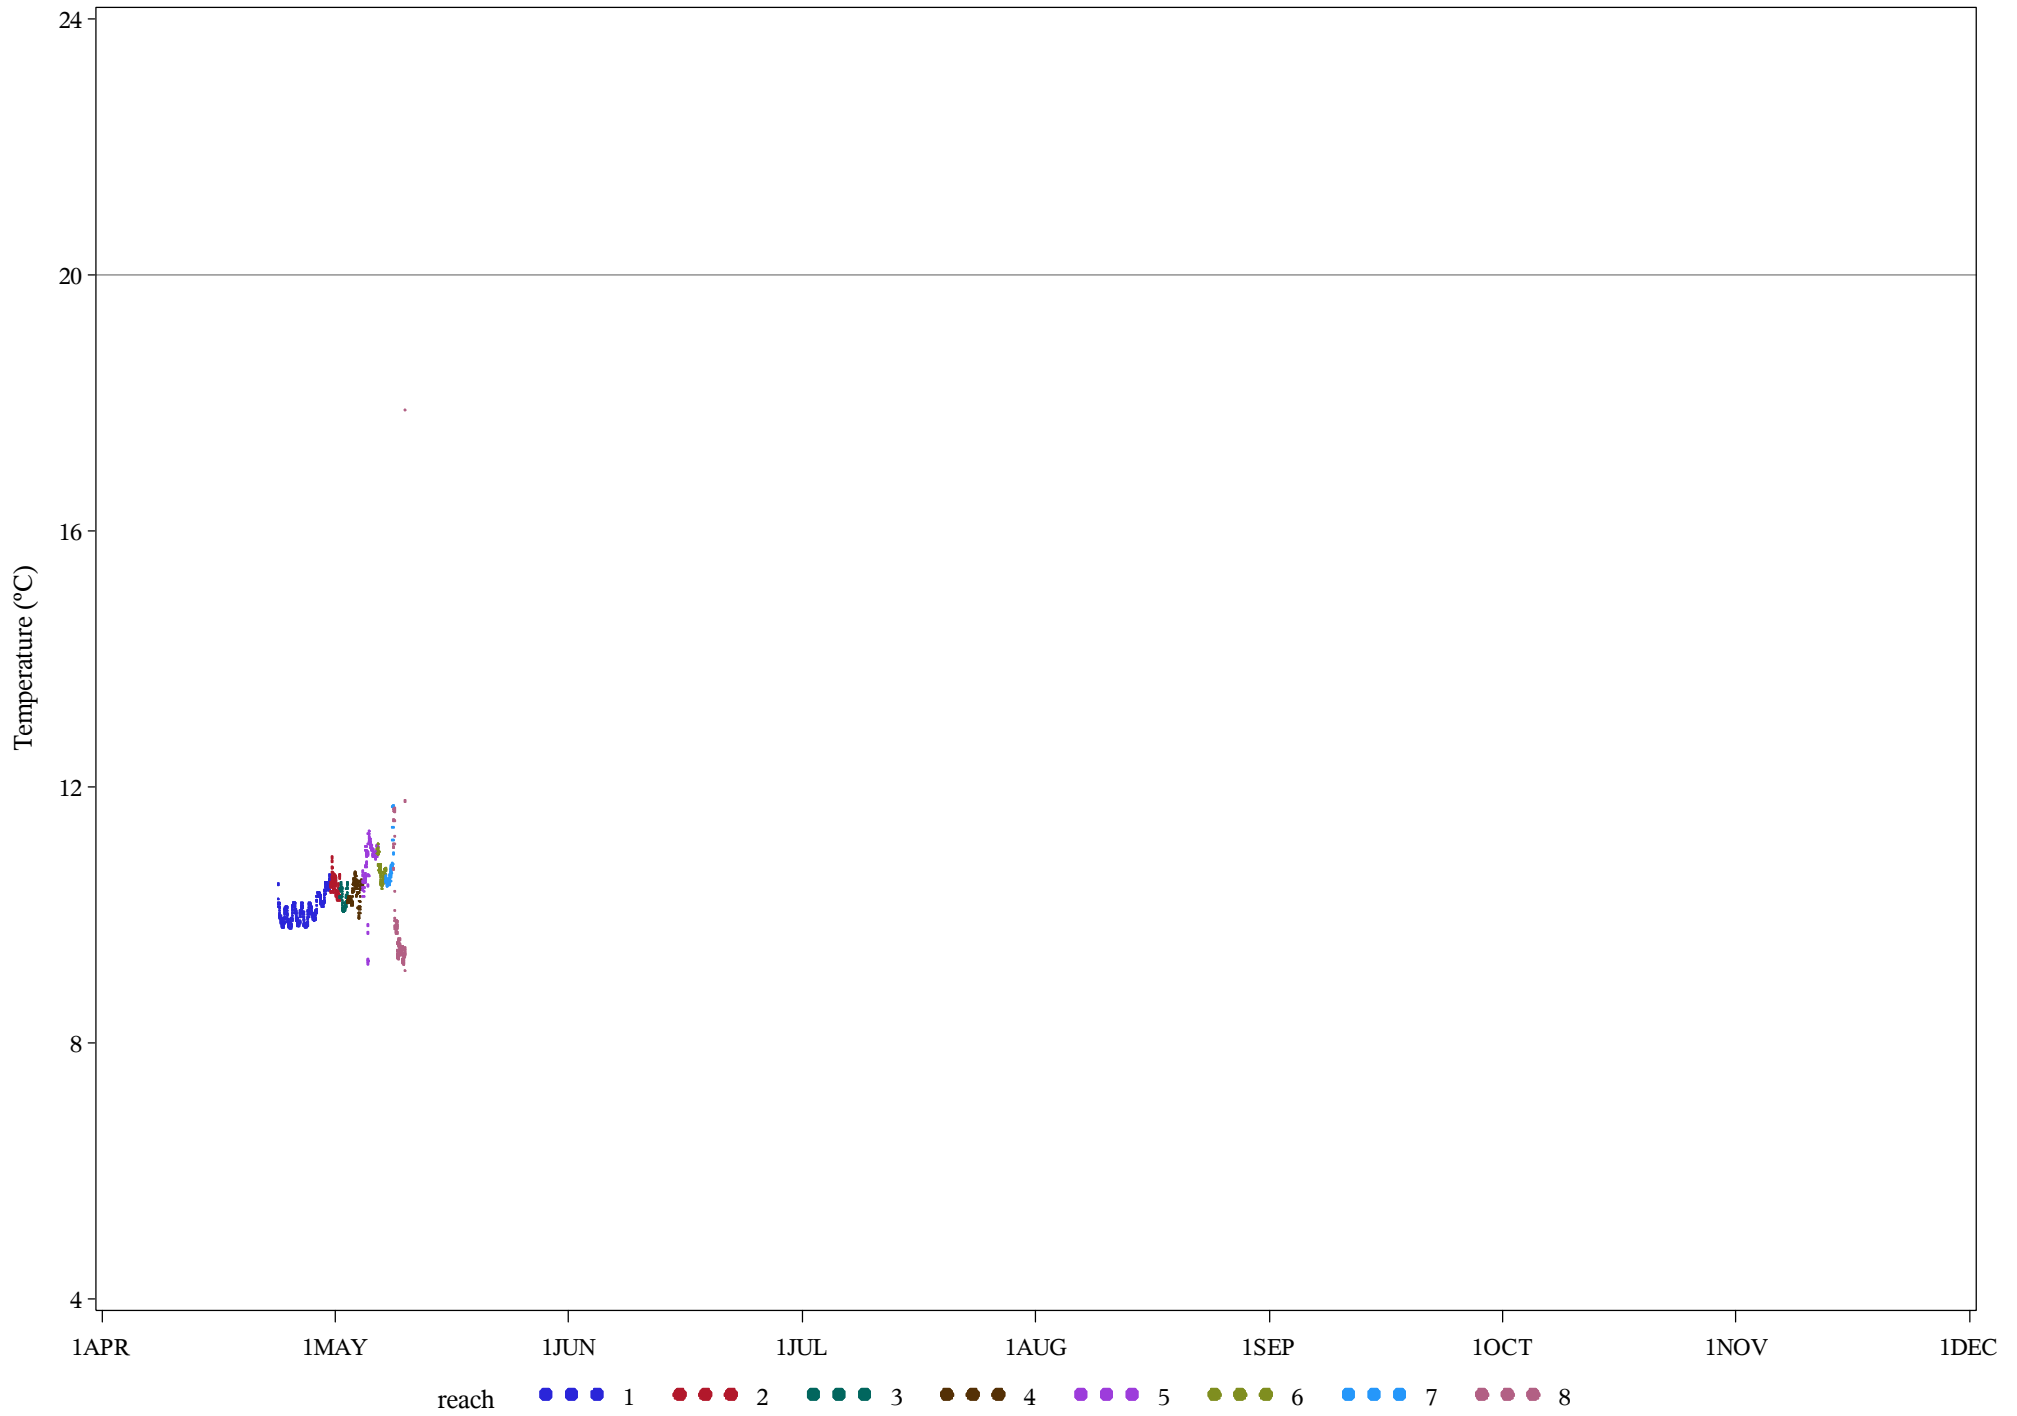

# Spring Chinook 3016A

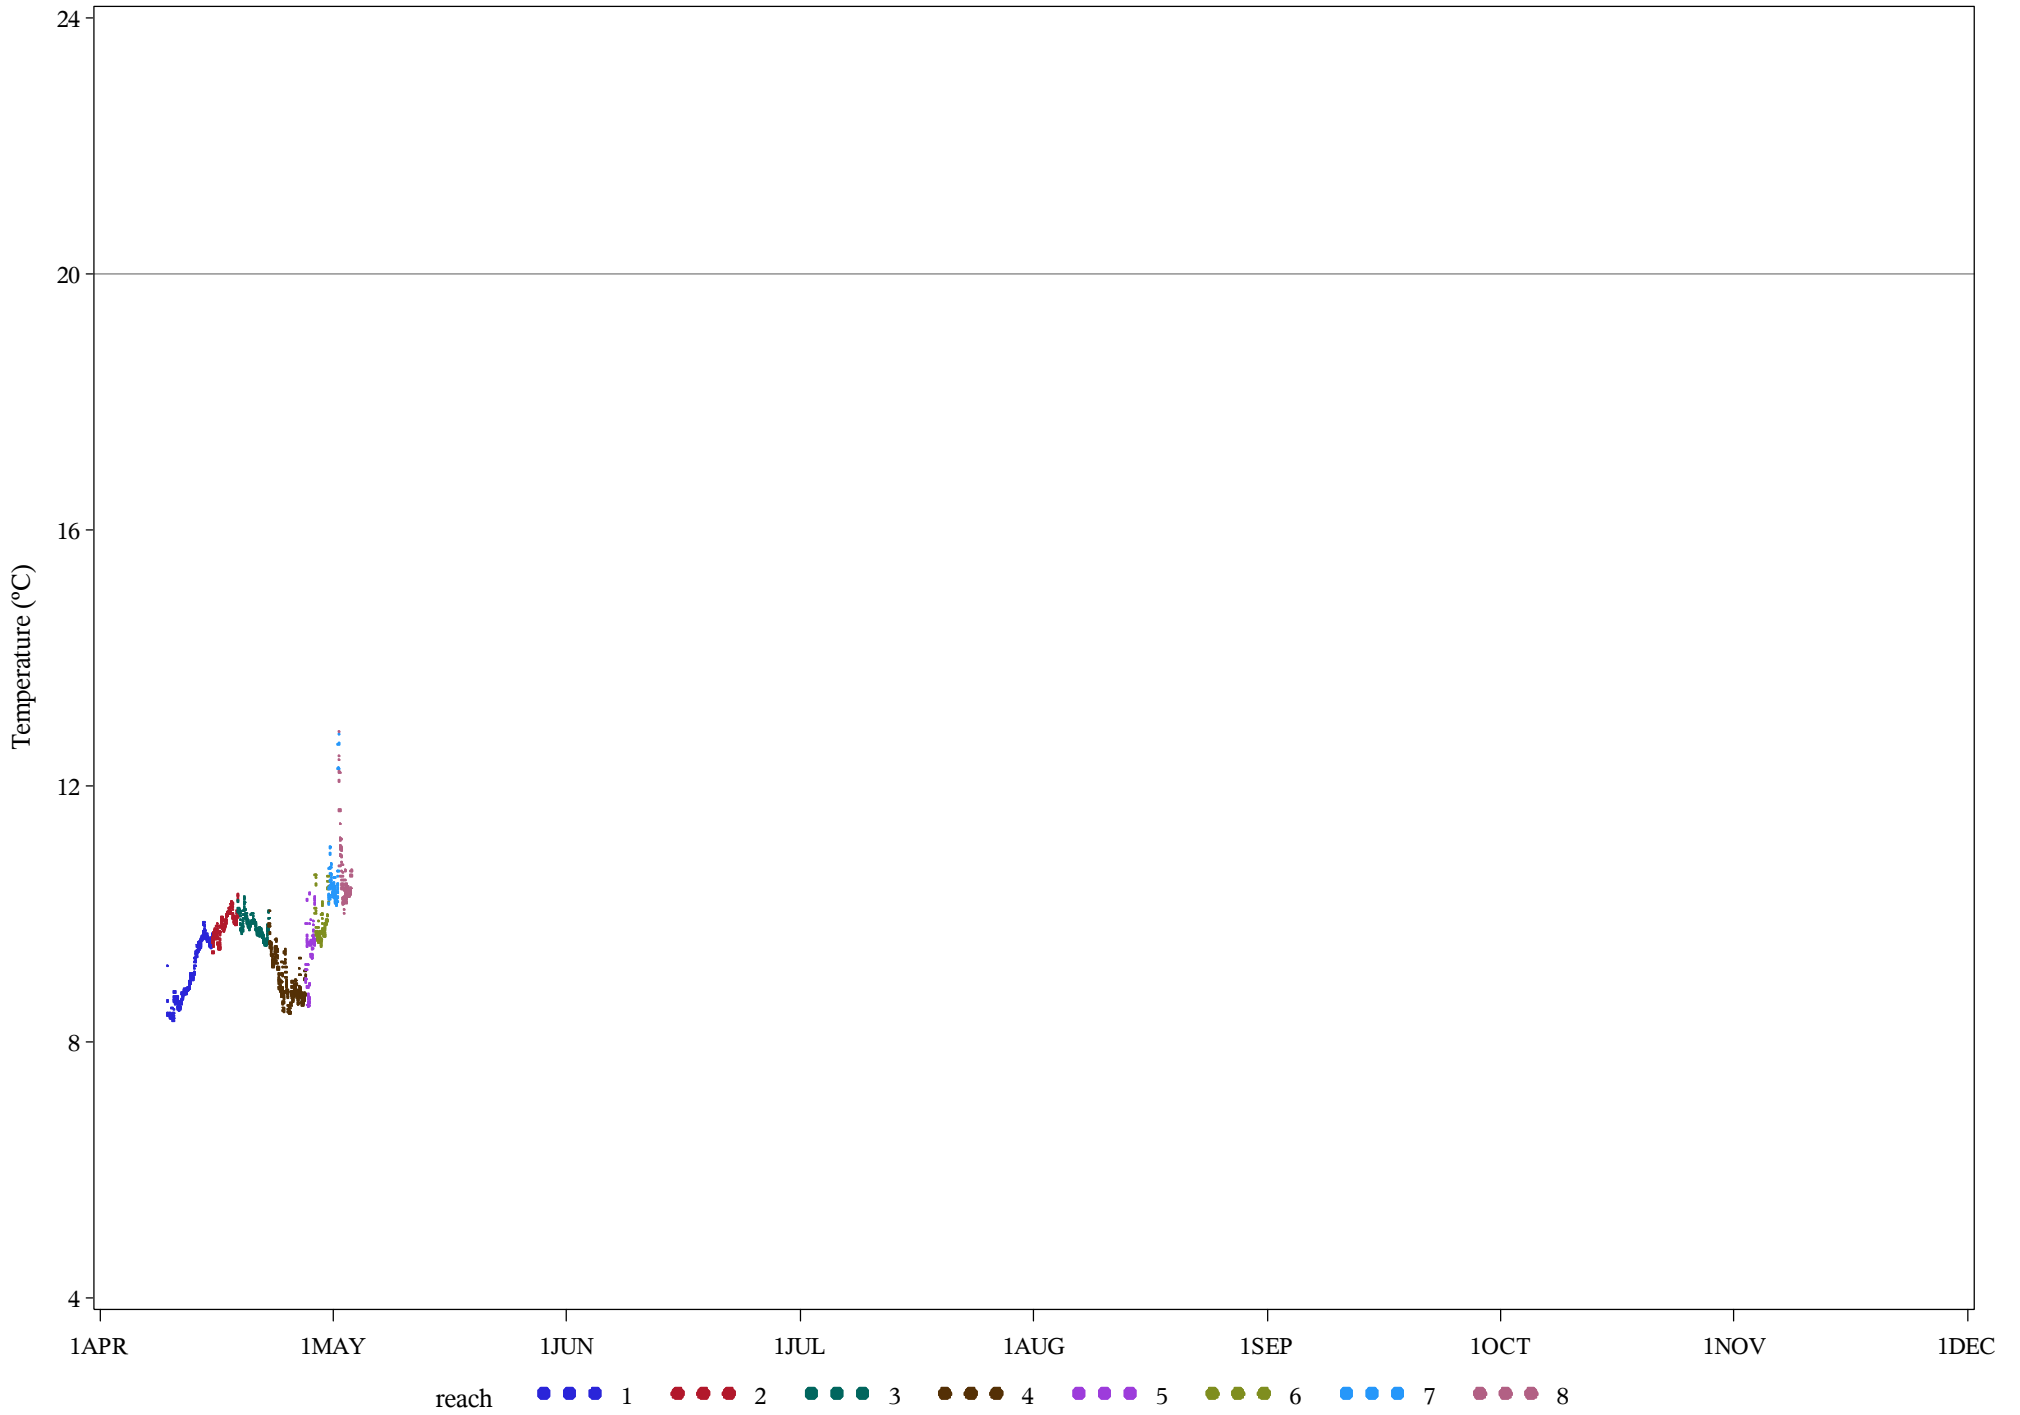



# Spring Chinook 3078A

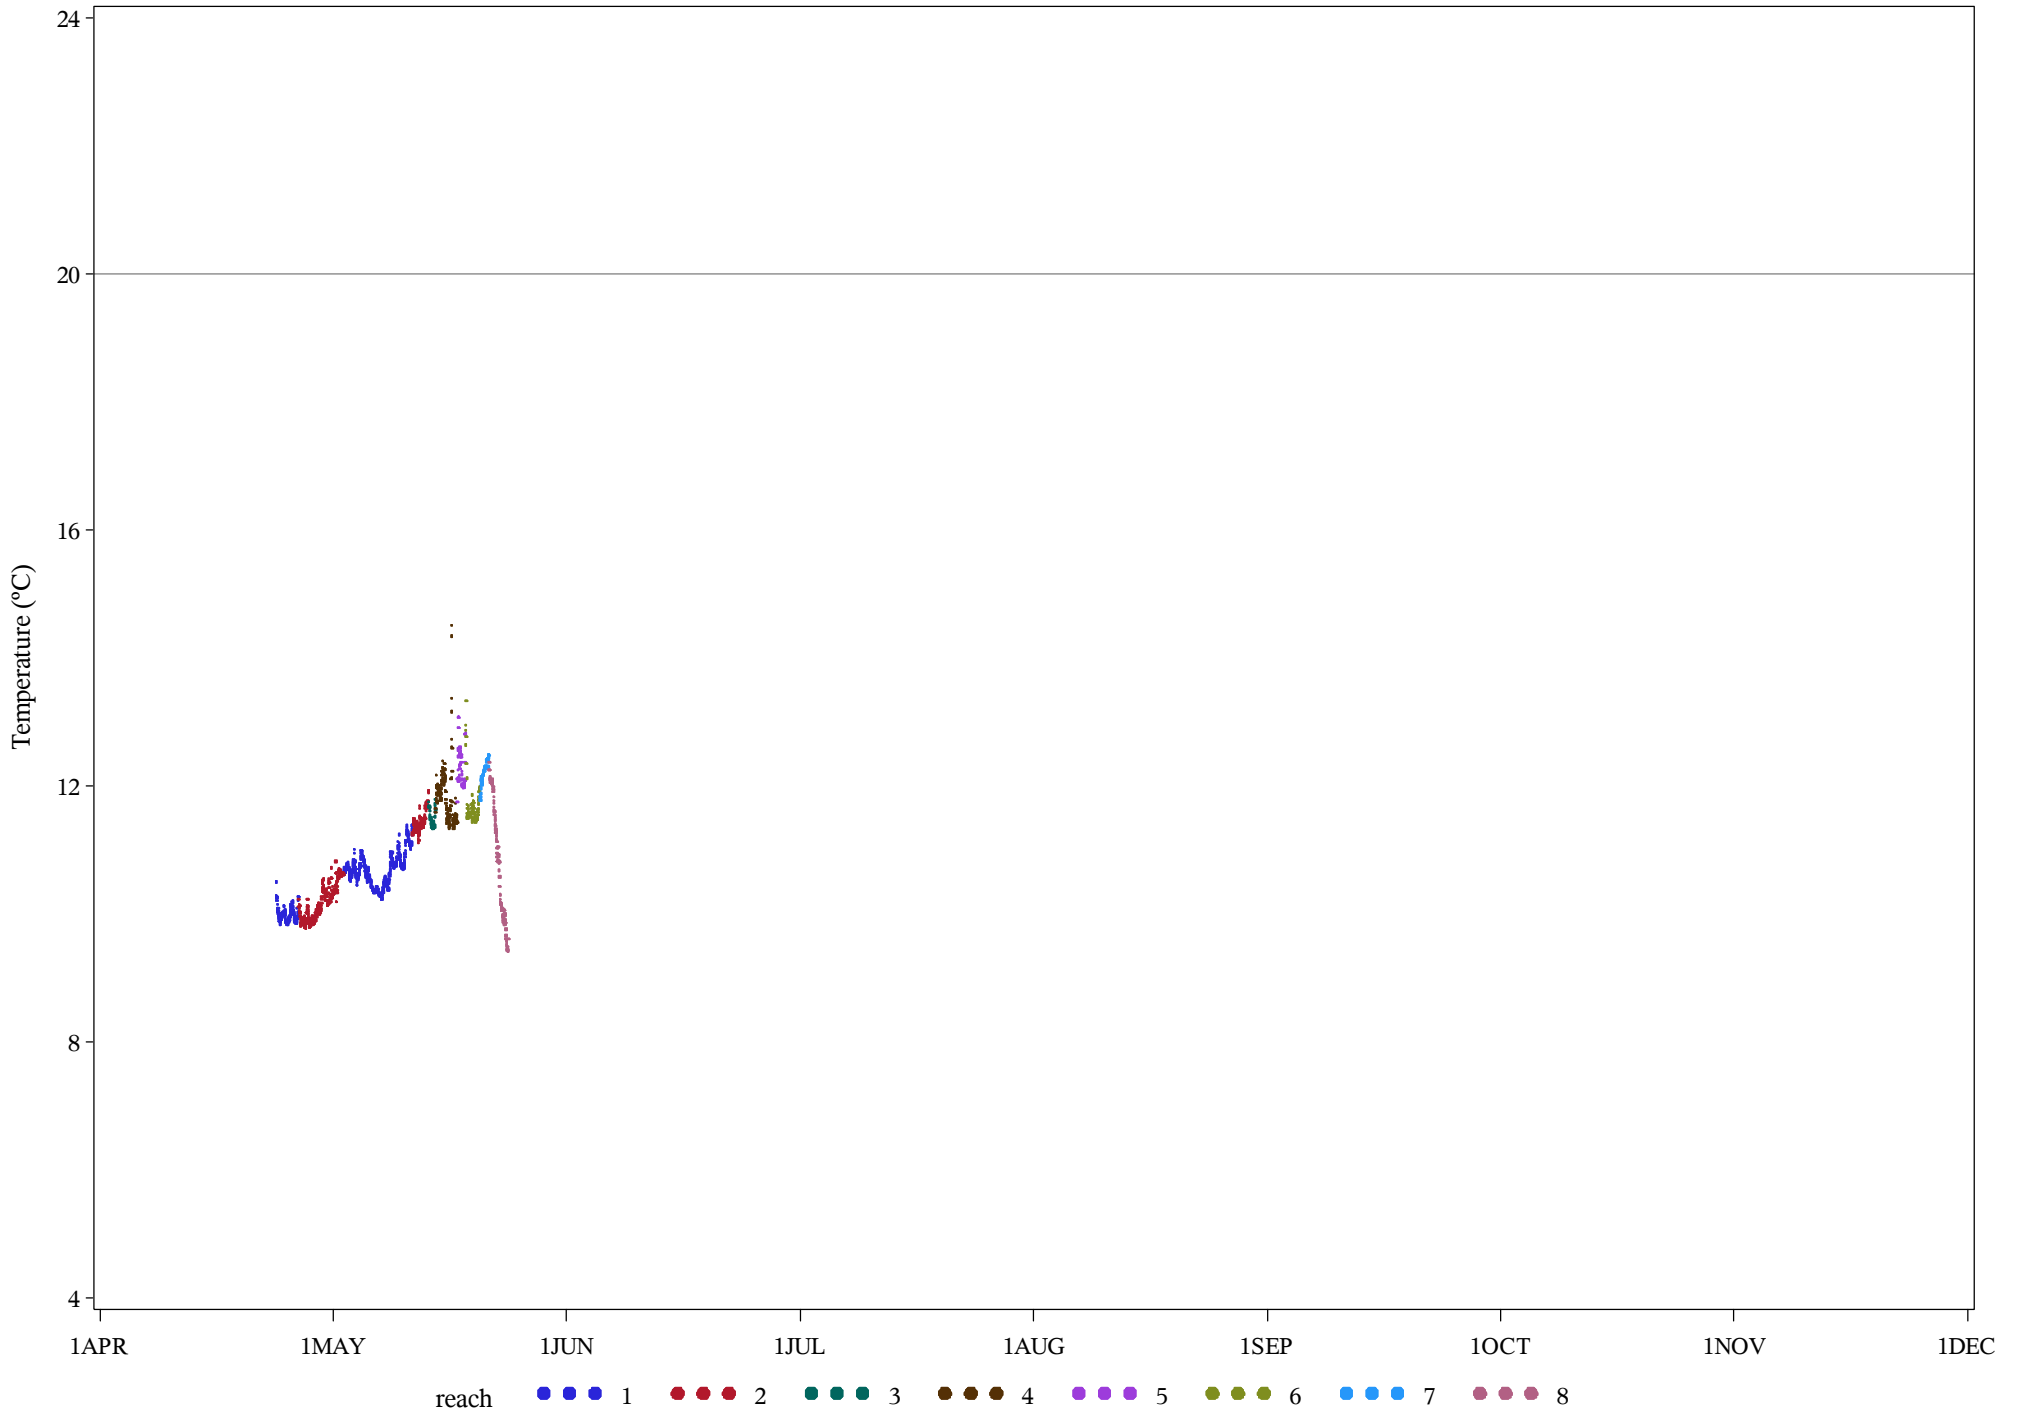



# Spring Chinook 3109A

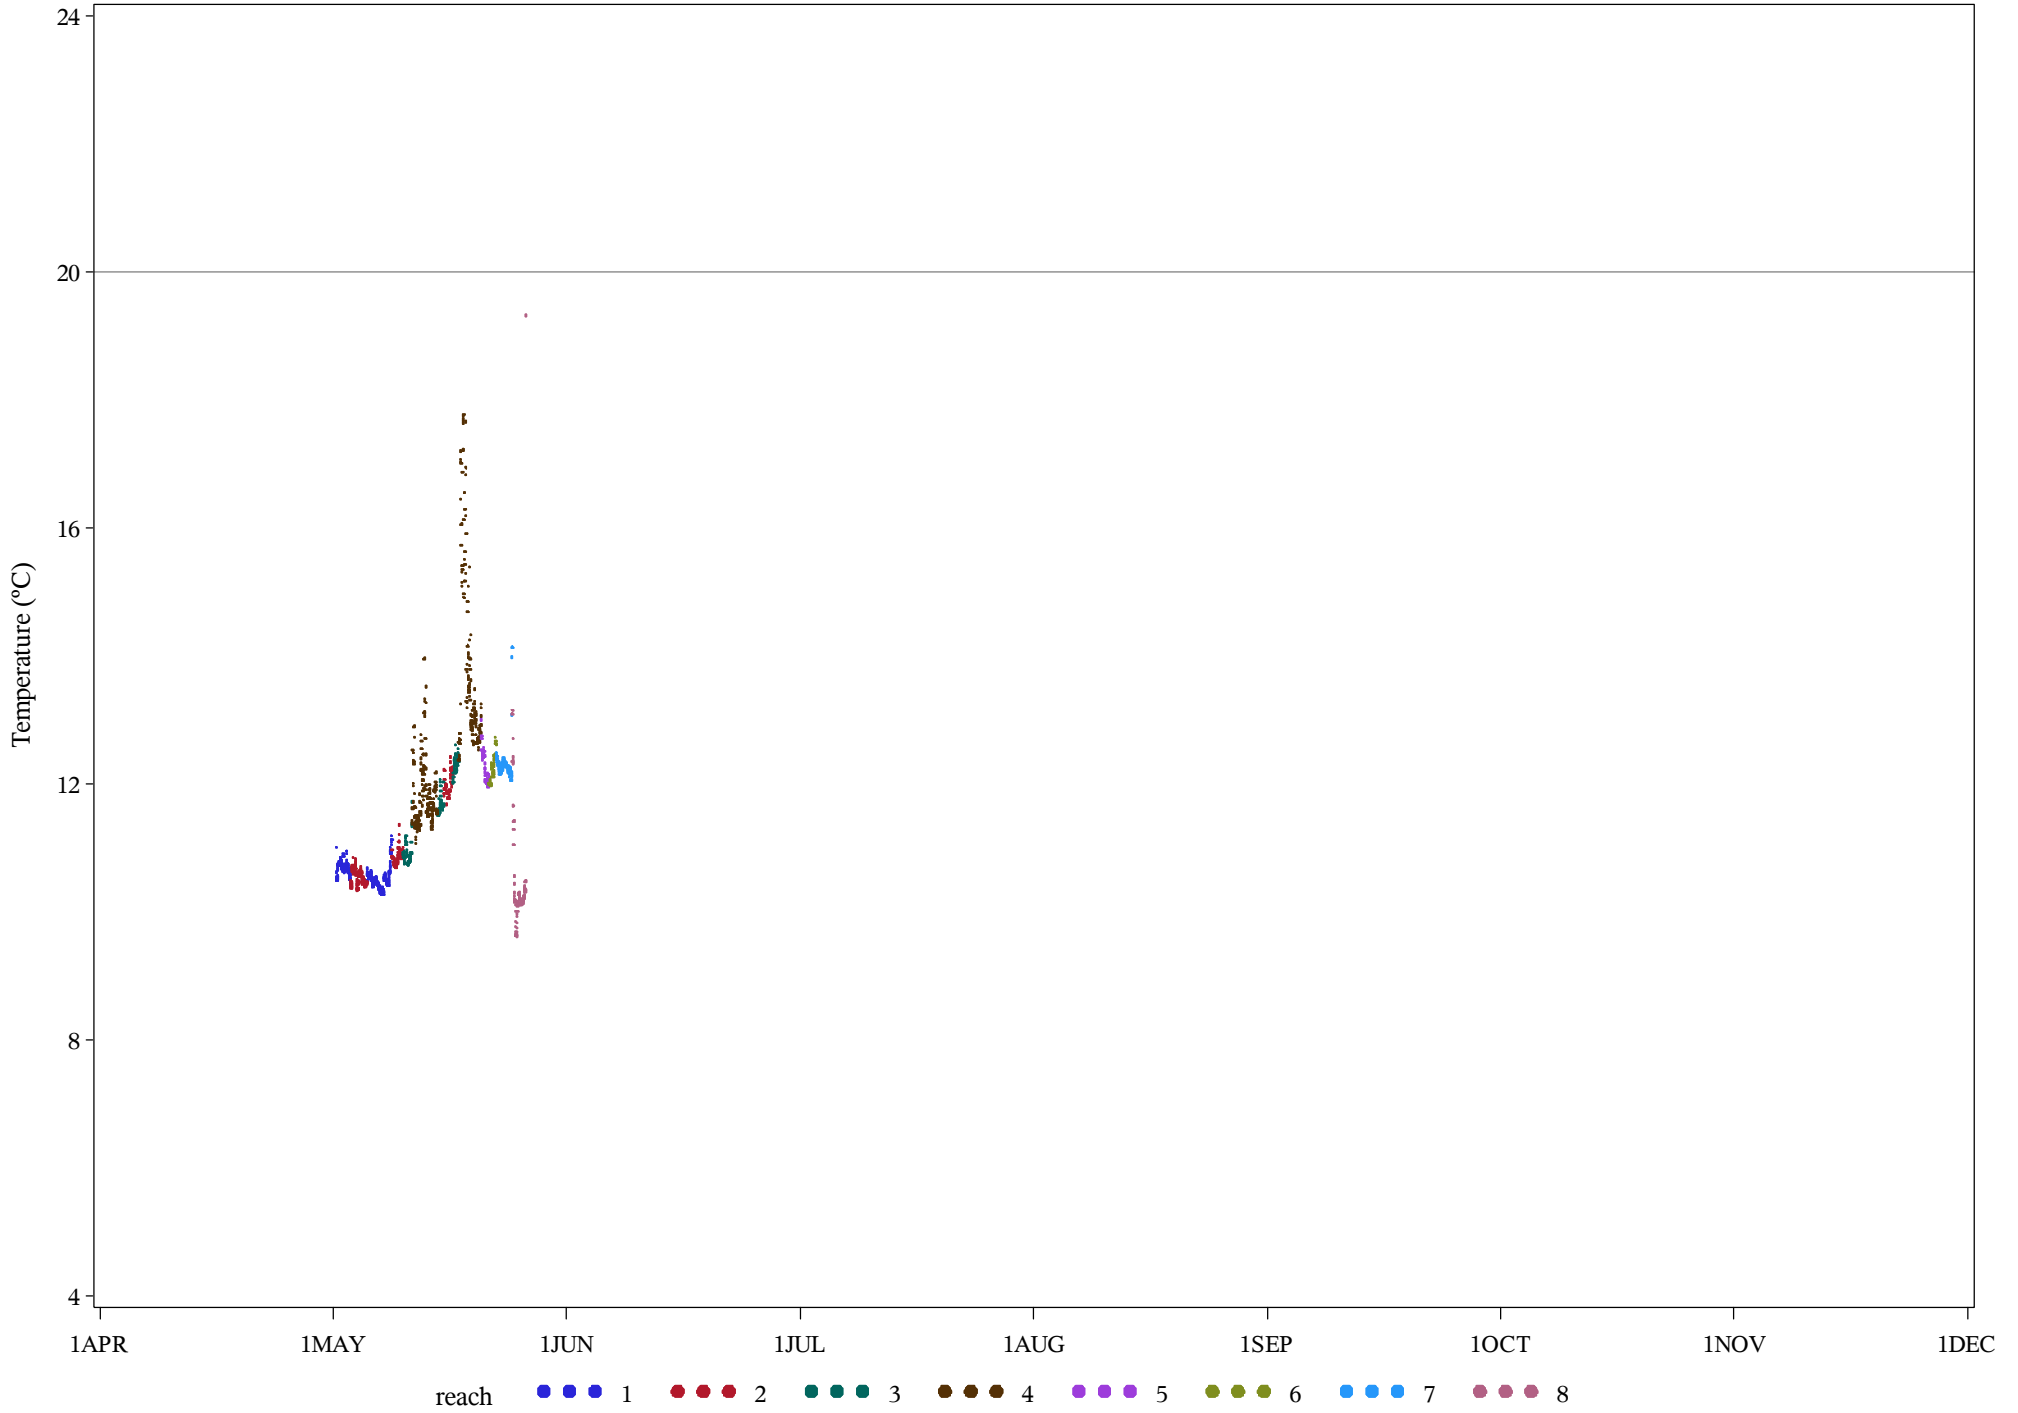



# Spring Chinook 3118A

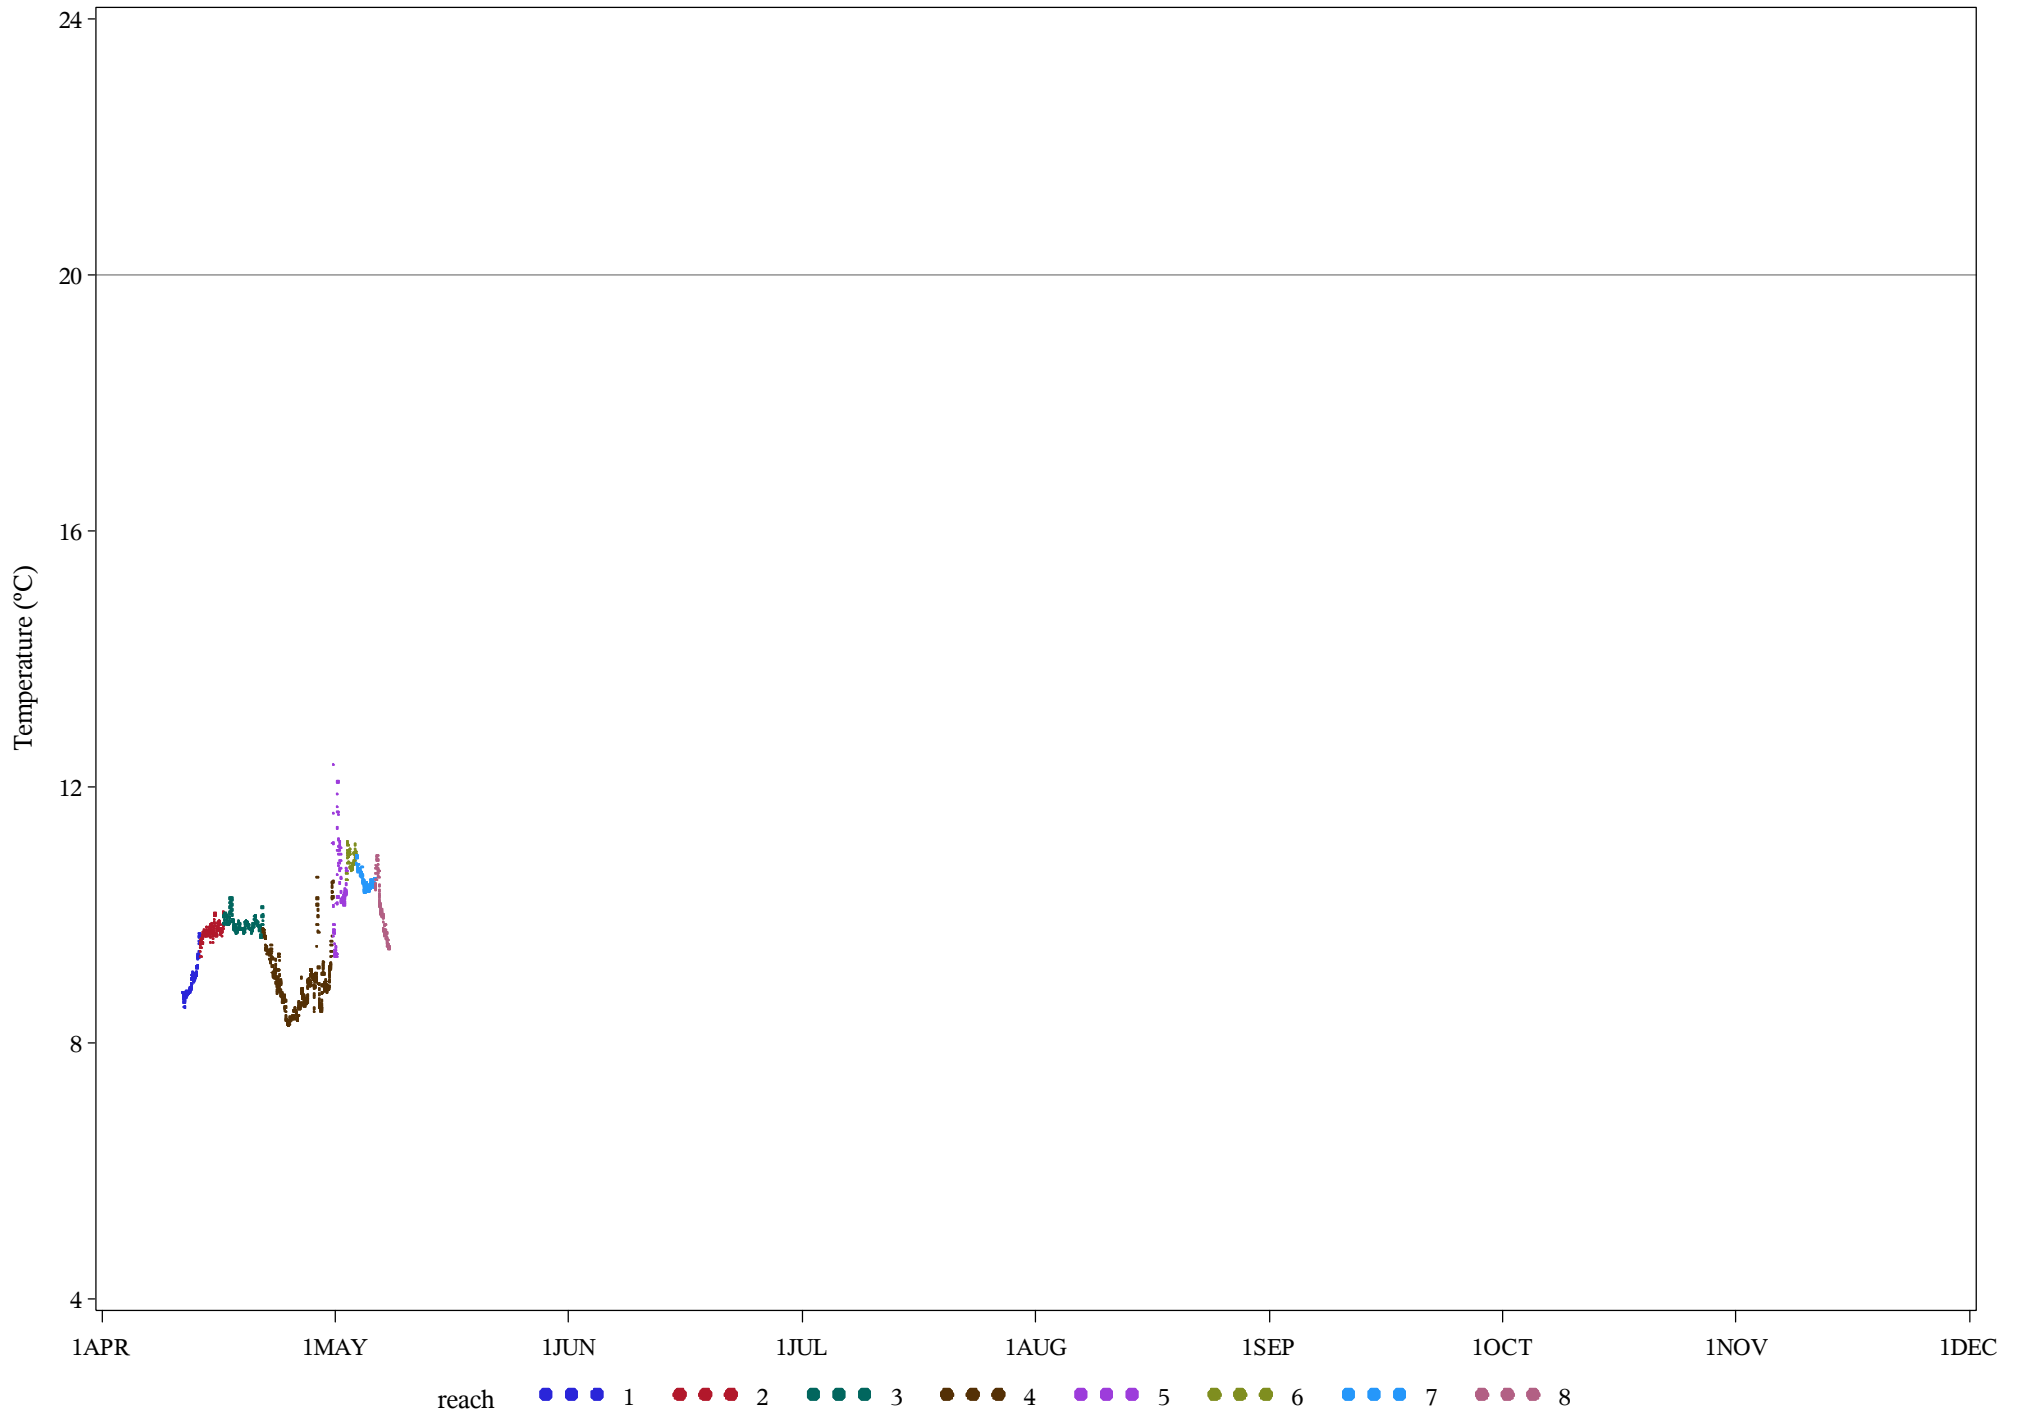





# Spring Chinook 3284A

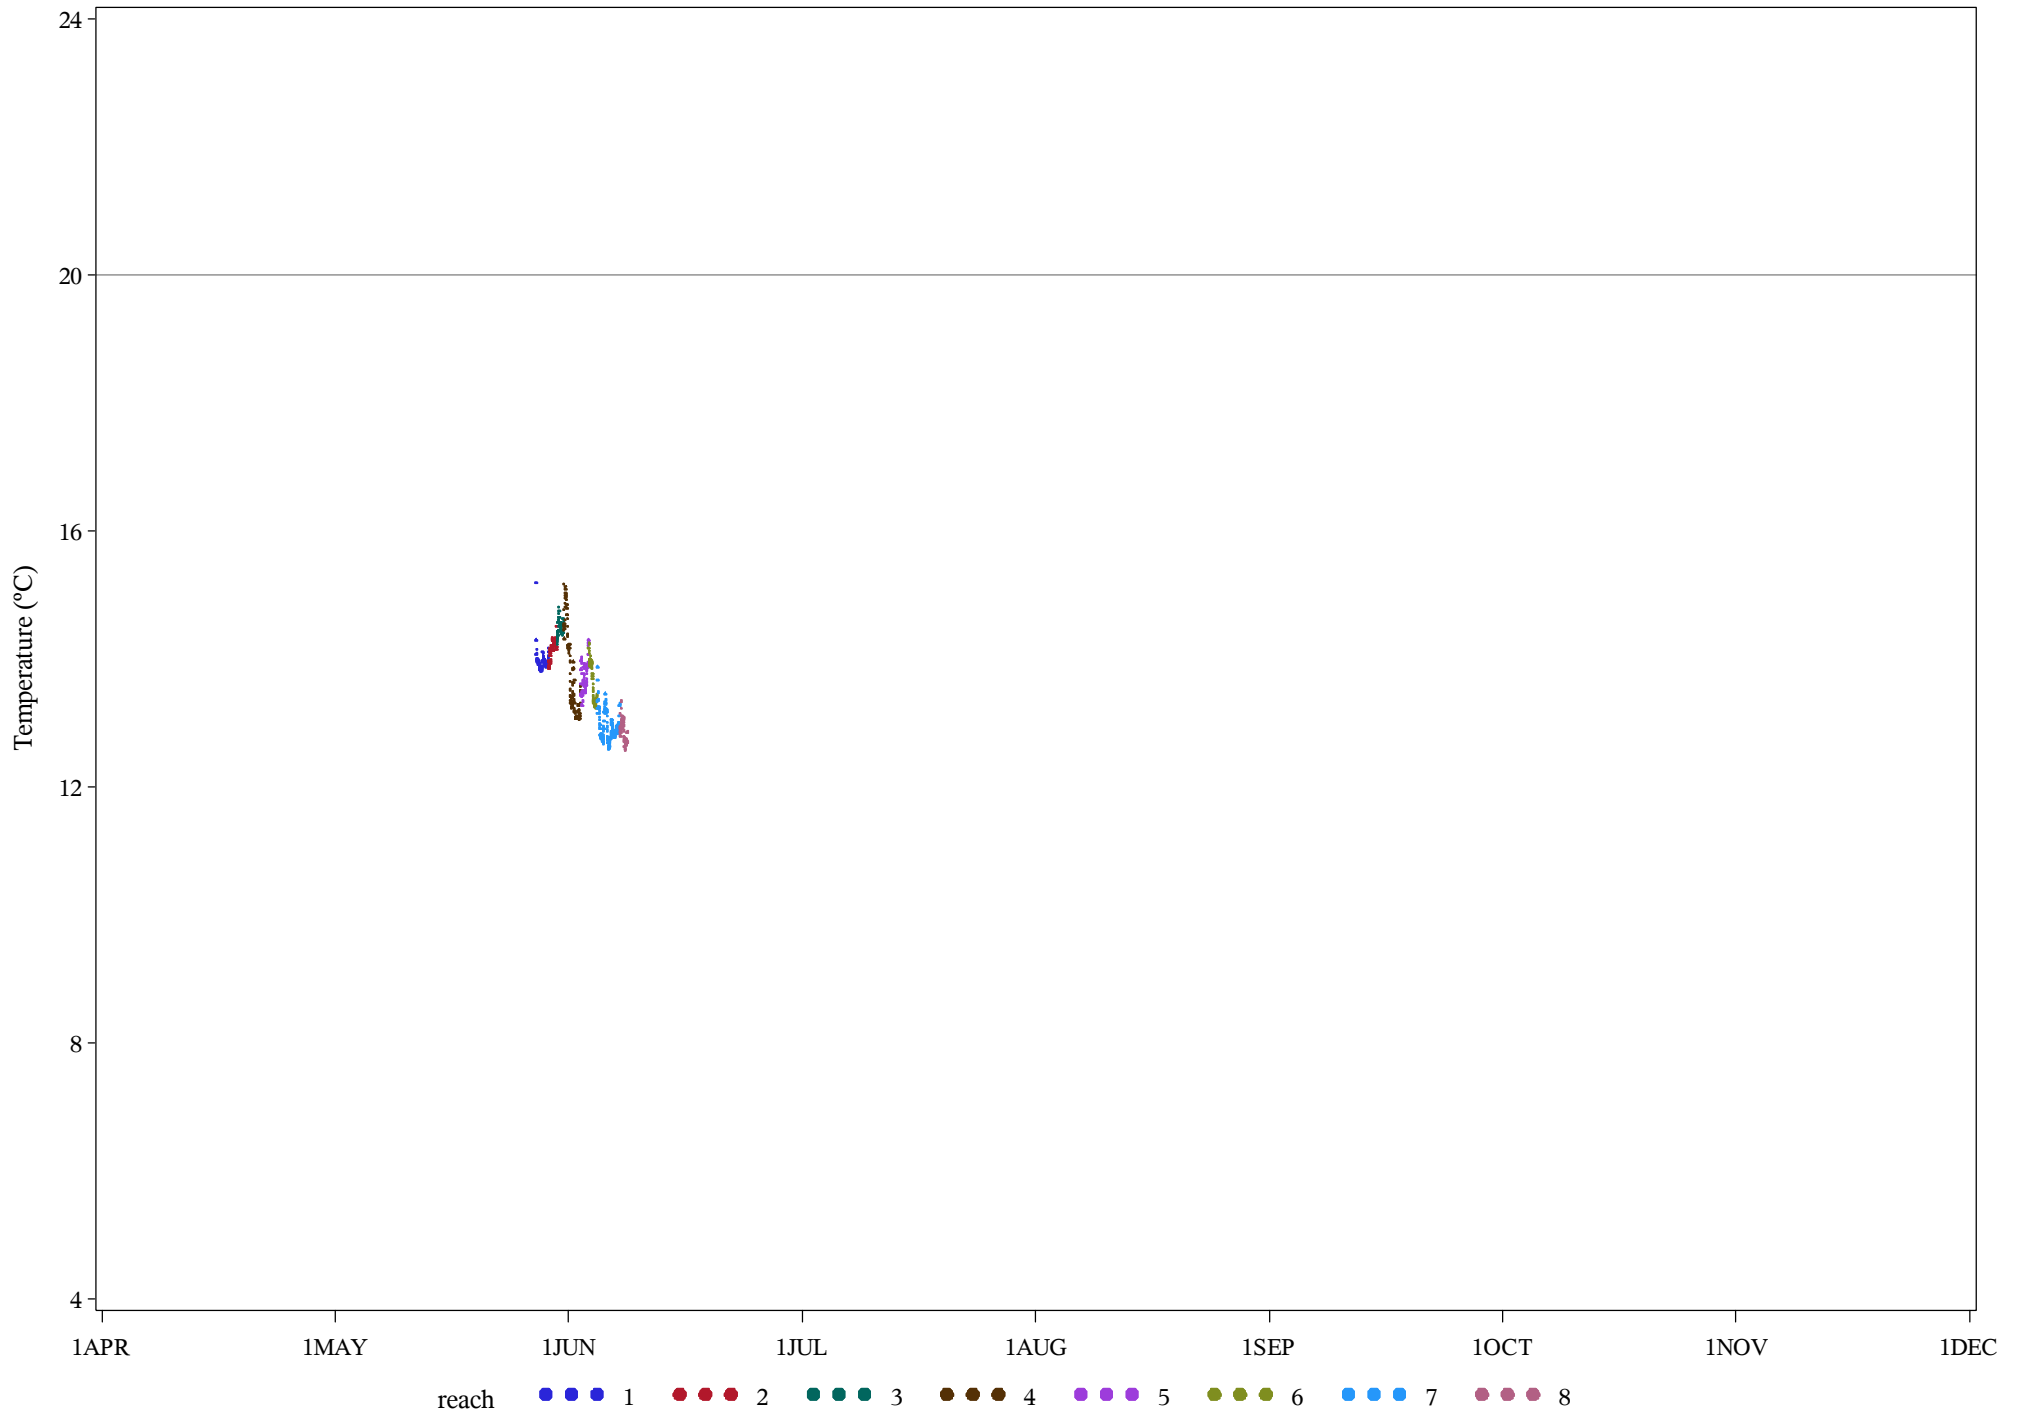



# Spring Chinook 3551A

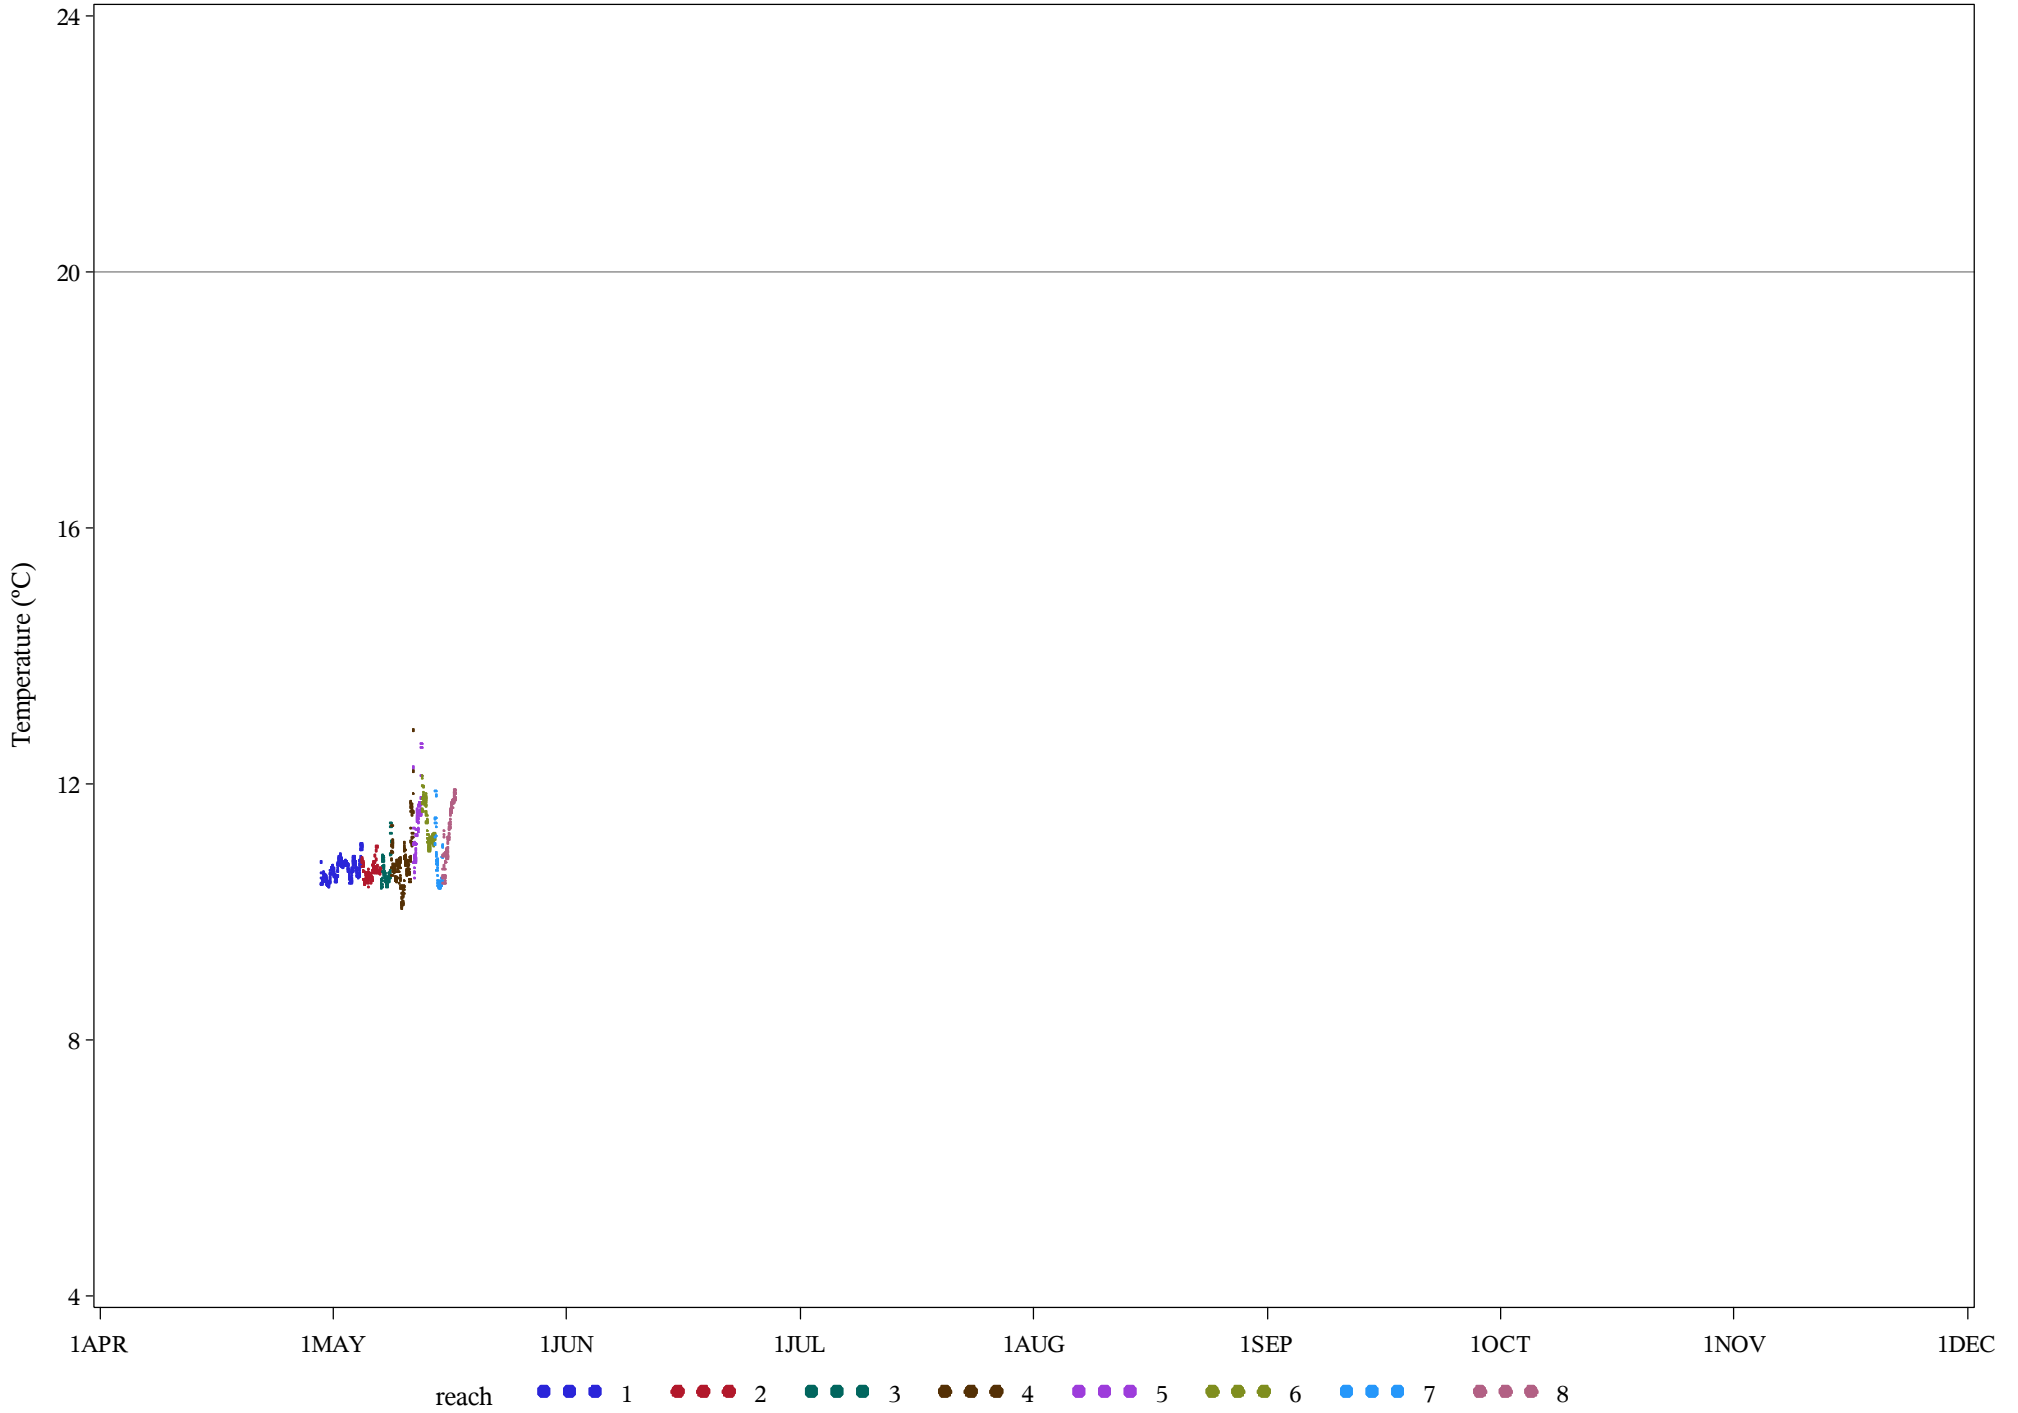

# Spring Chinook 3563A

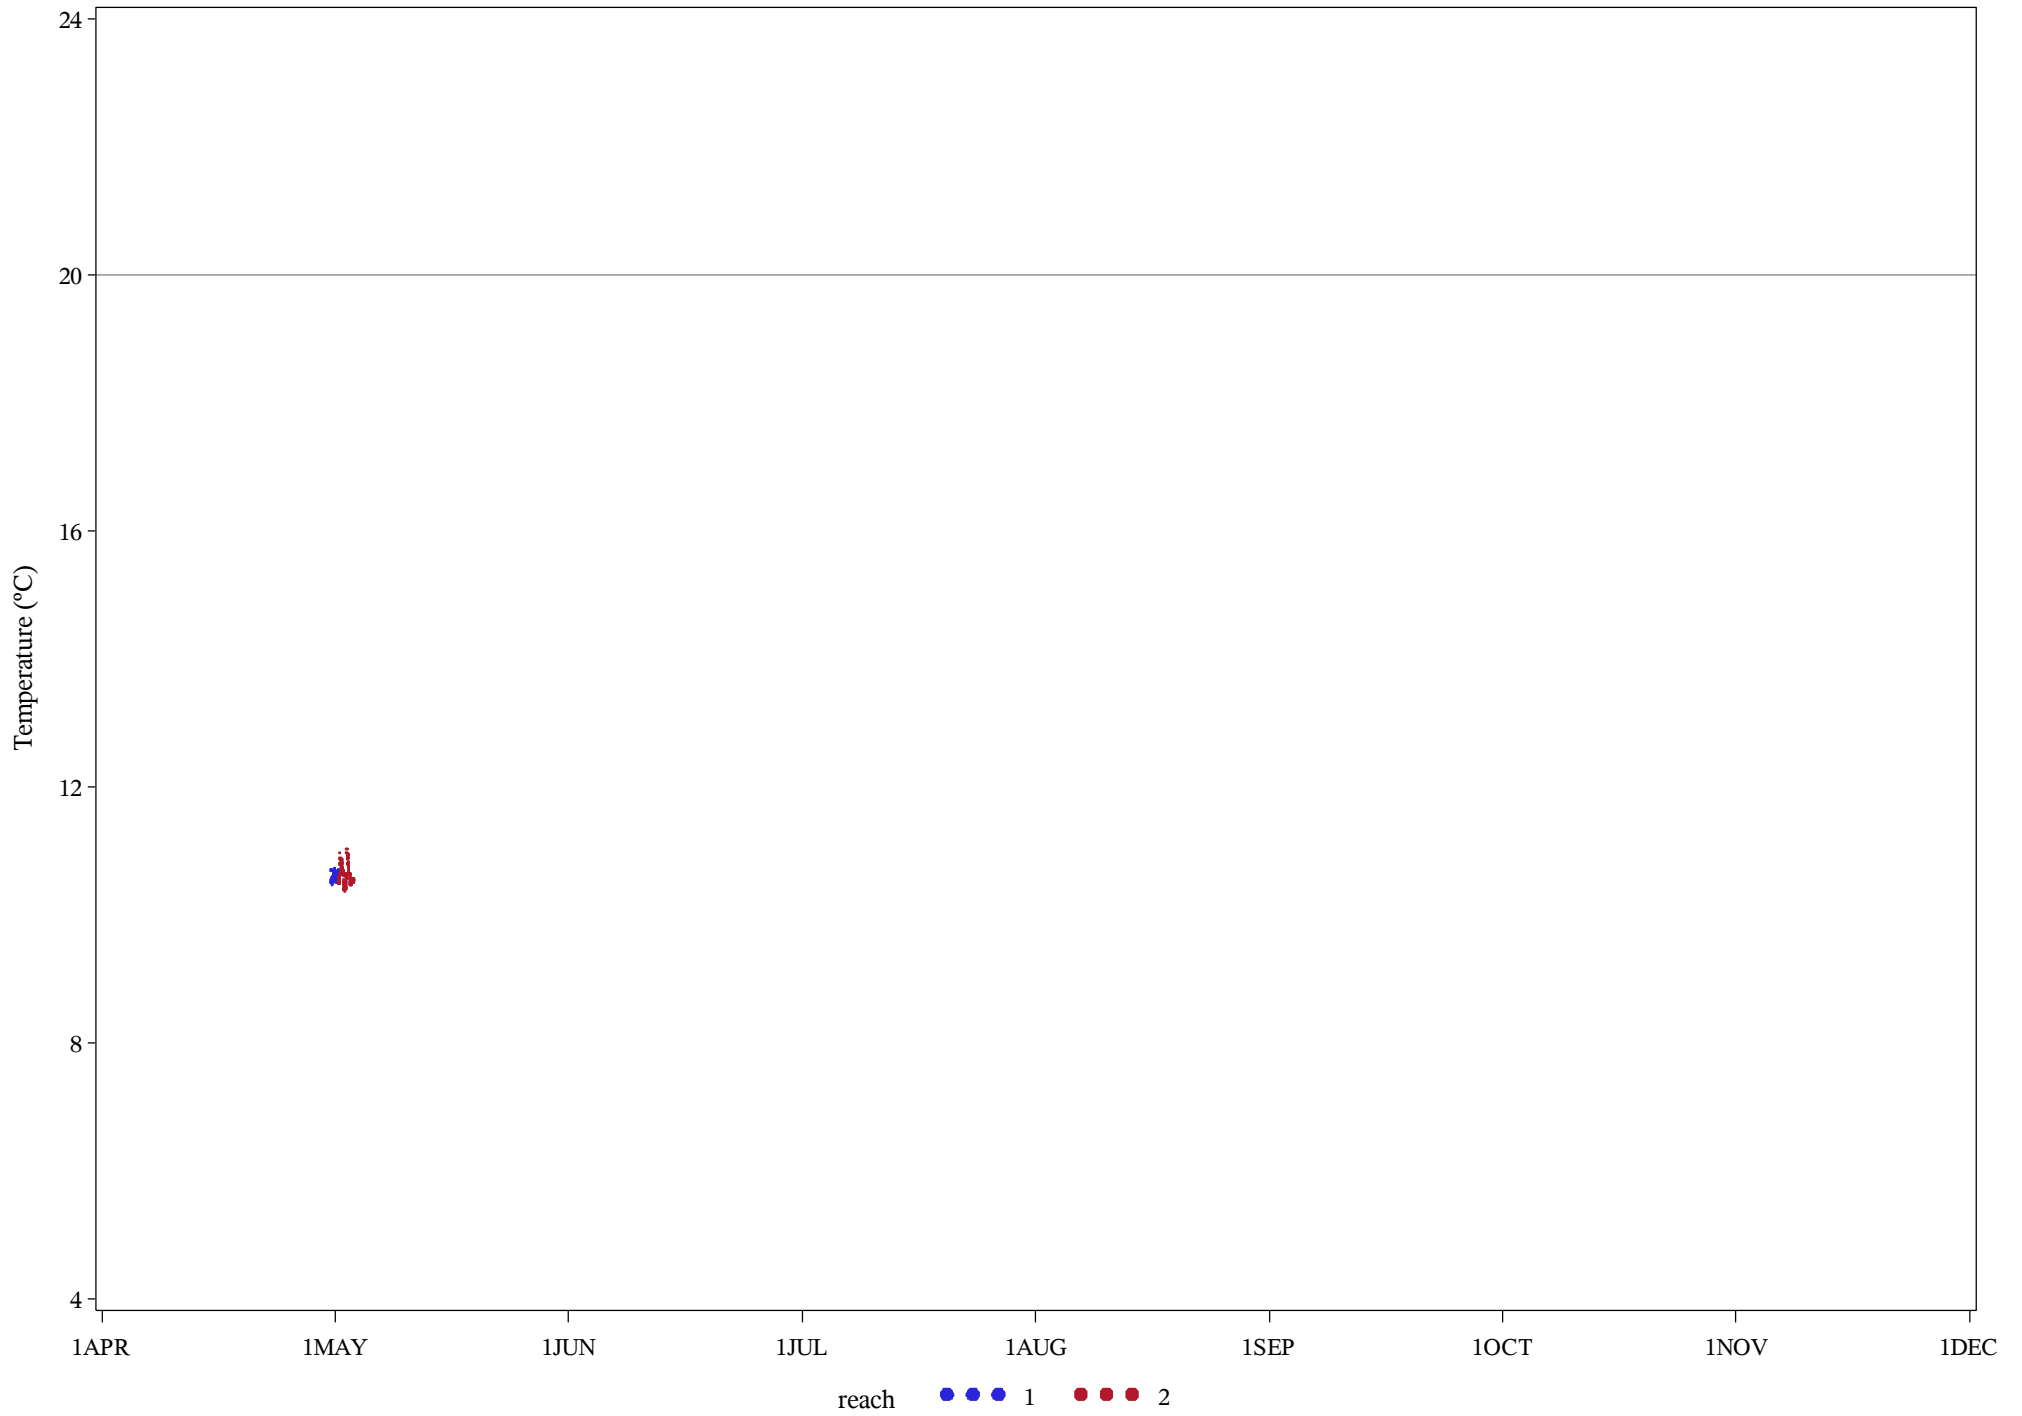

# Spring Chinook 3577A

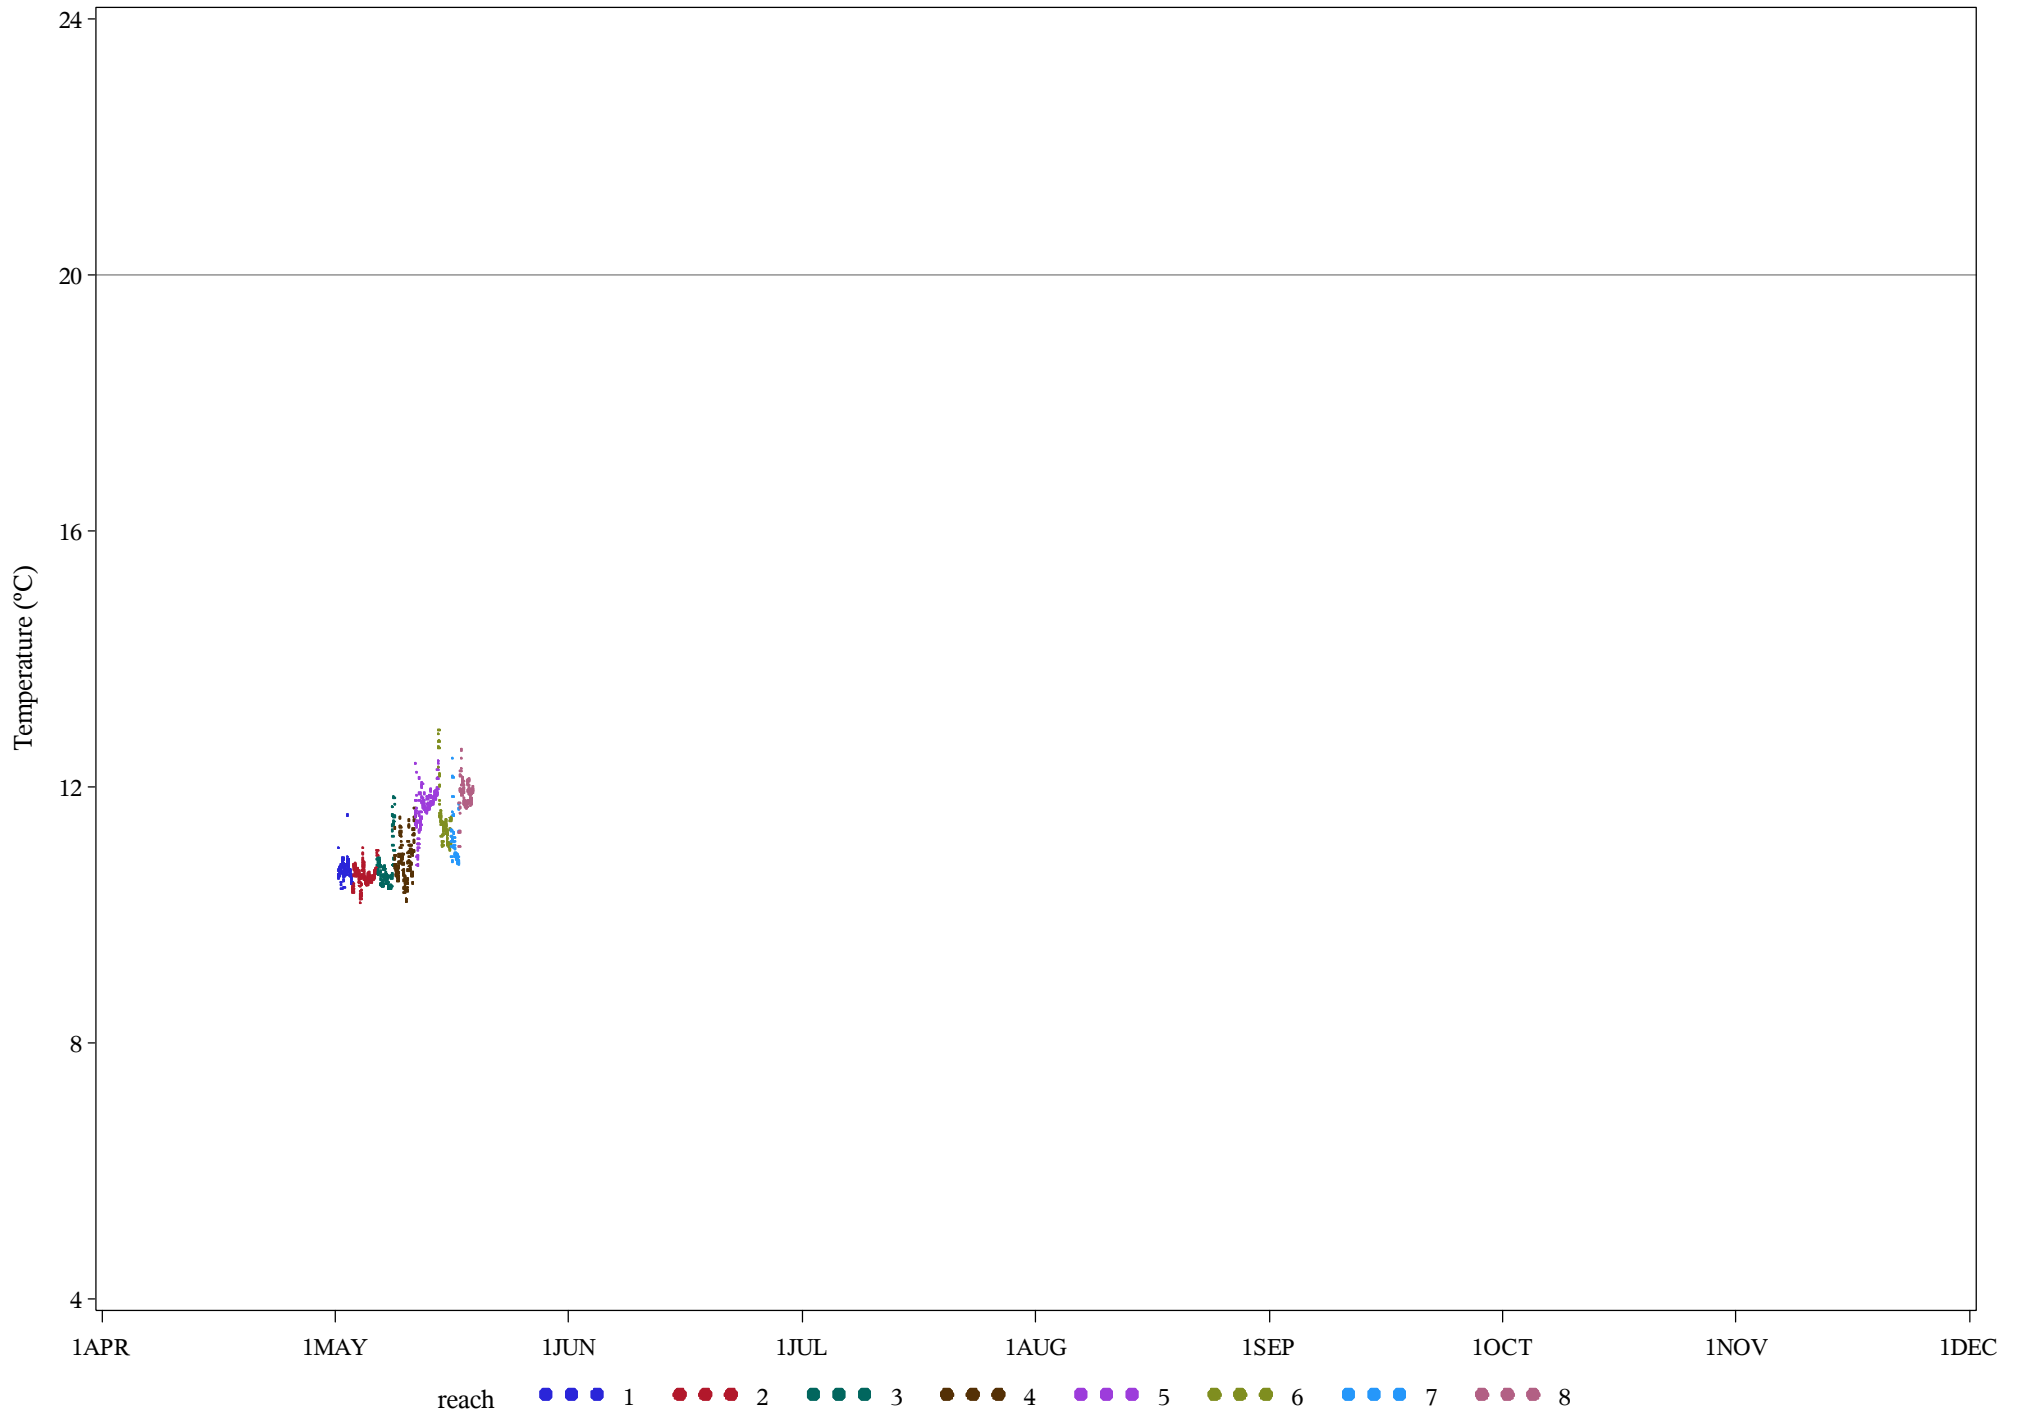

# Spring Chinook 3589A

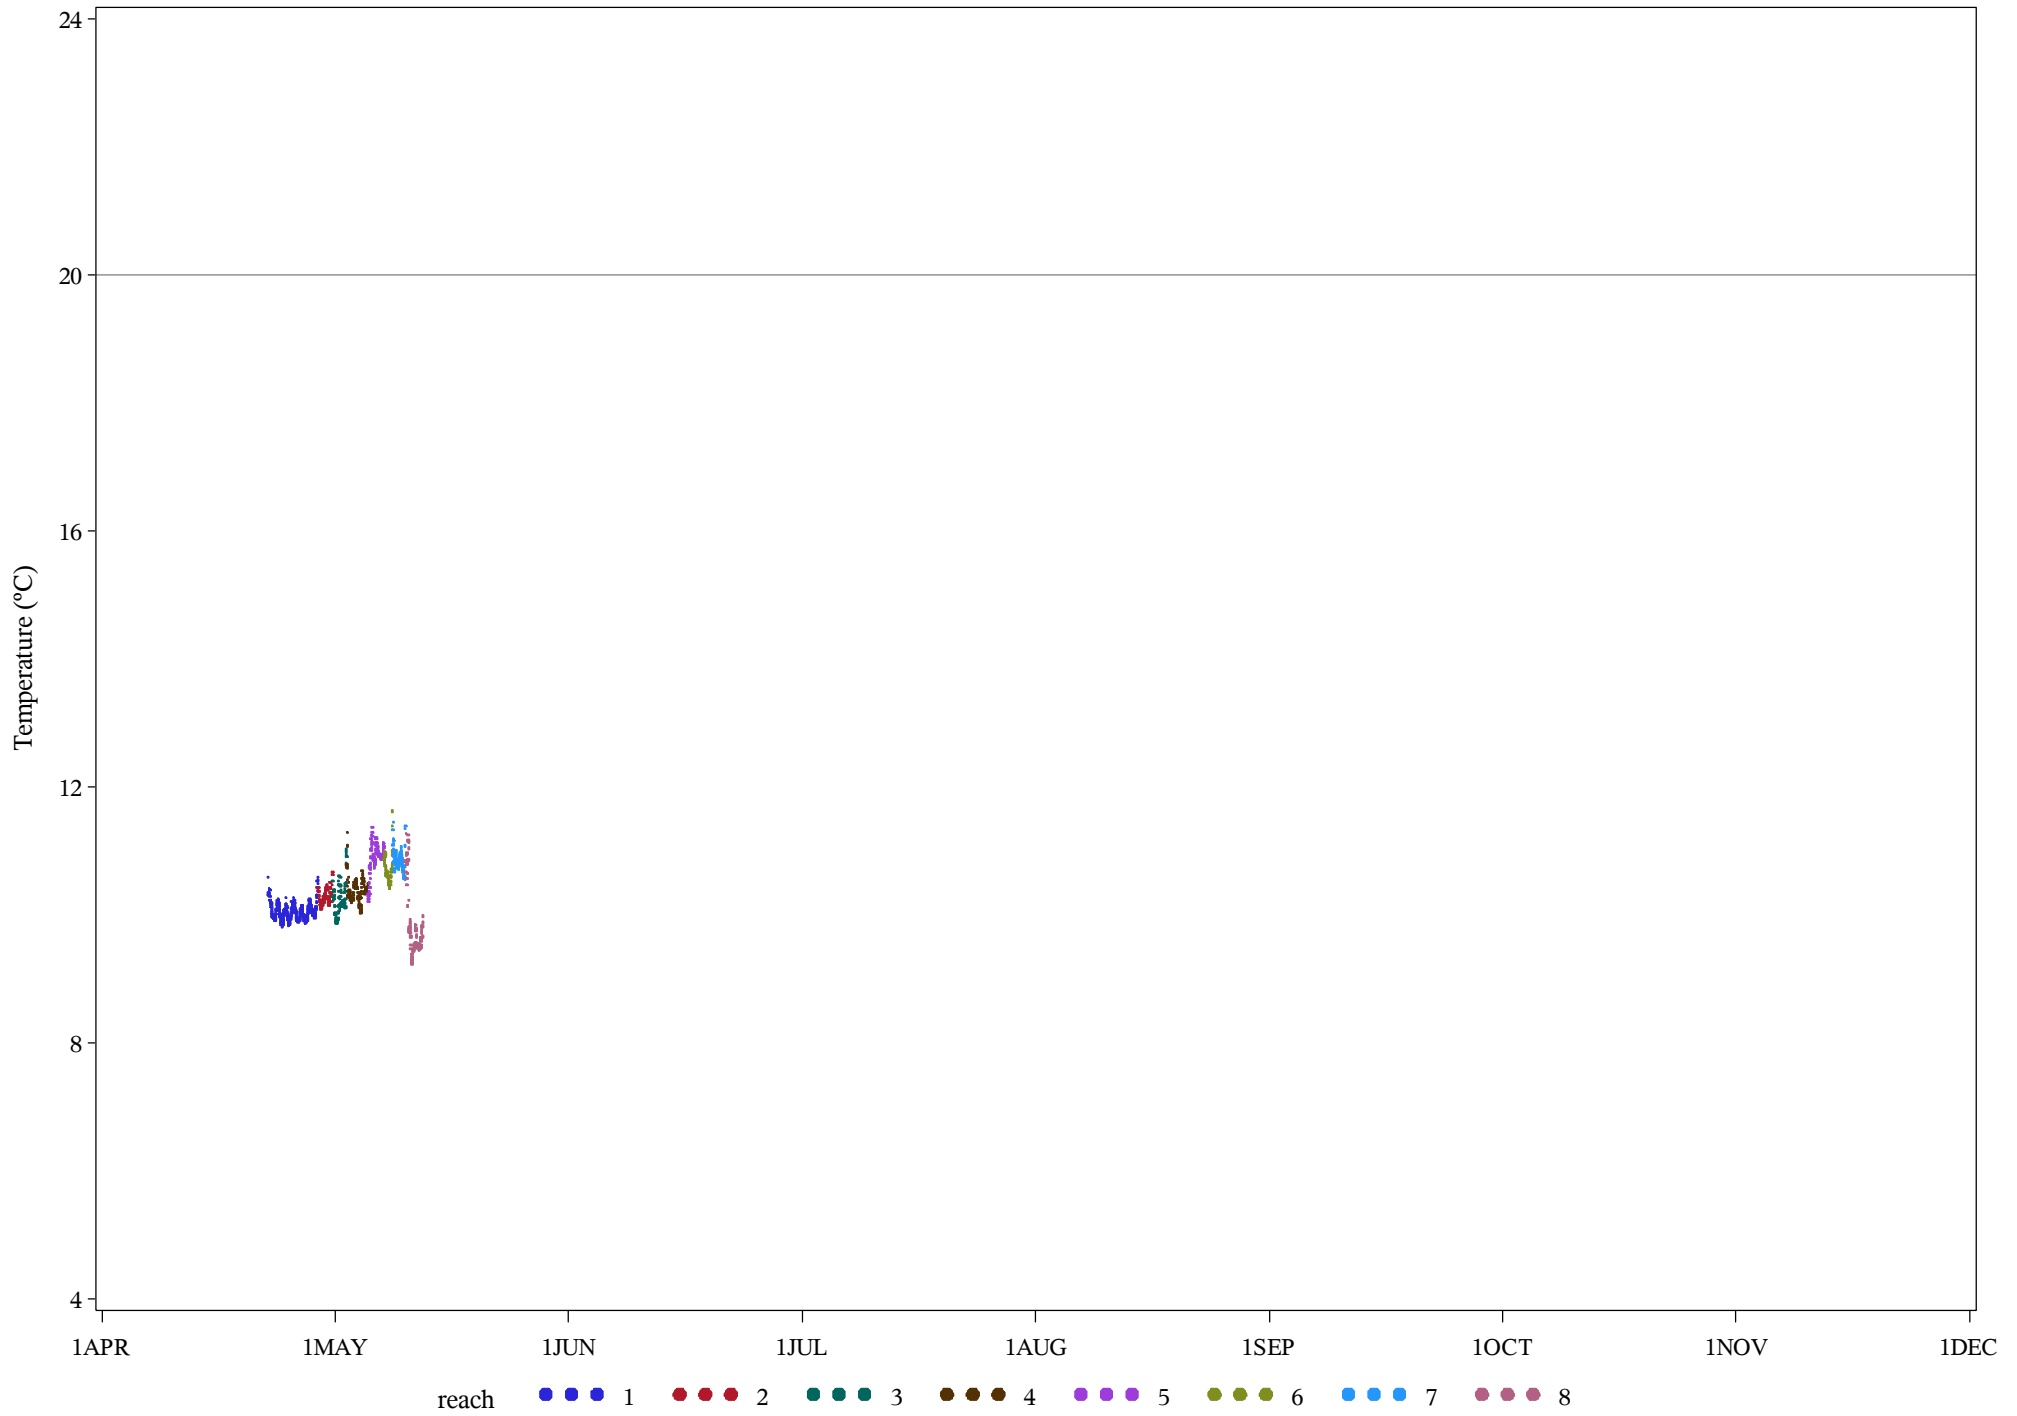

# Spring Chinook 3705A

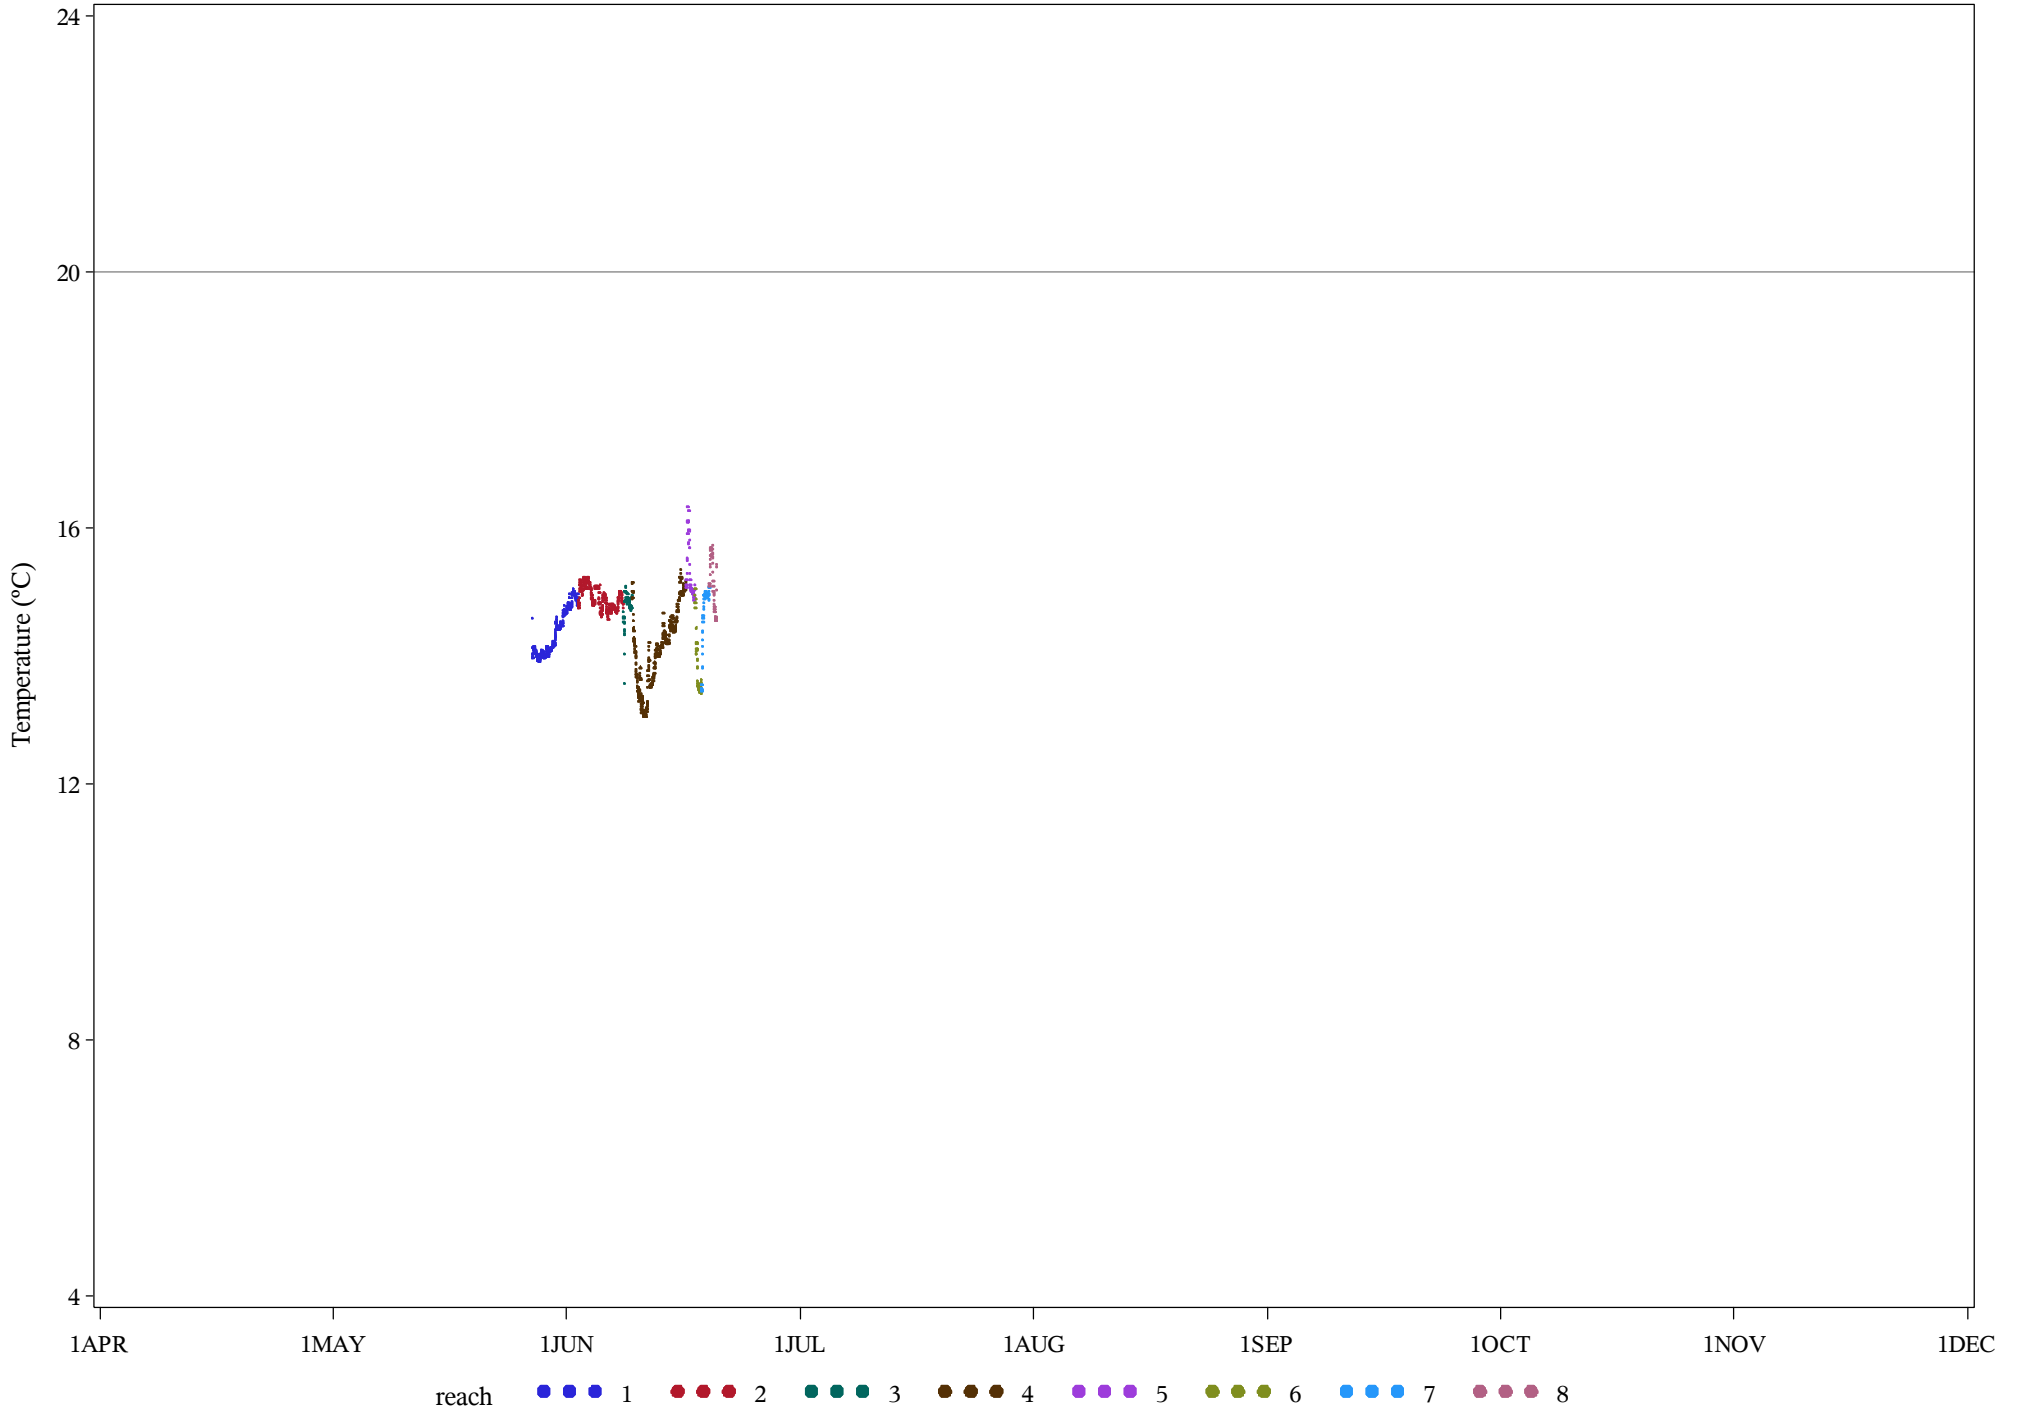



# Spring Chinook 3710A

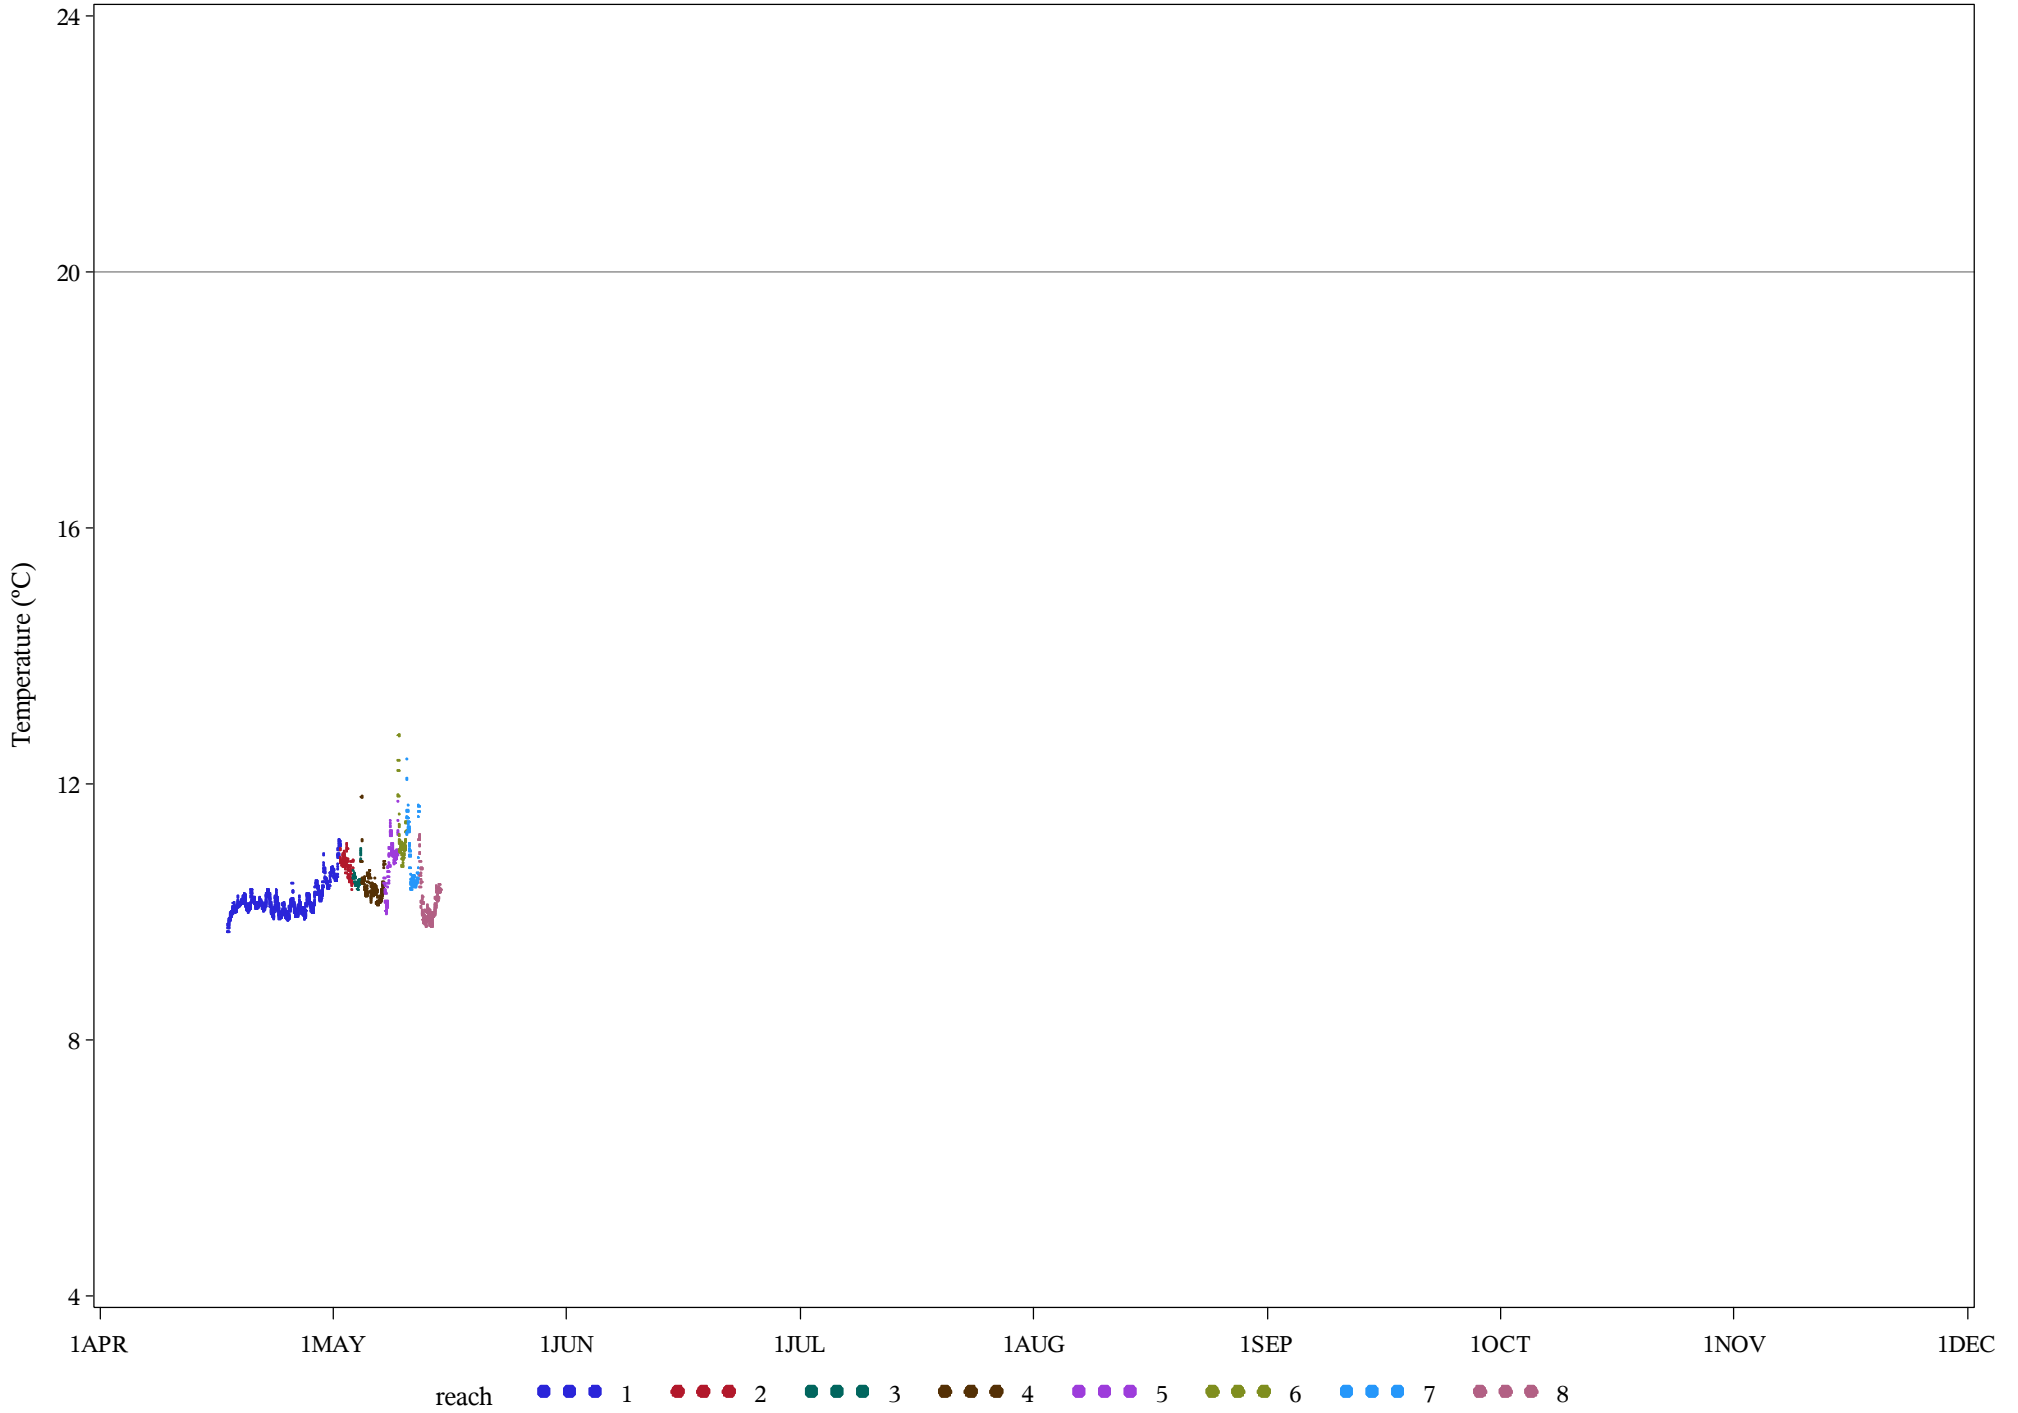

reach    ● ● ● 1    ● ● ● 2    ● ● ● 3    ● ● ● 4    ● ● ● 5    ● ● ● 6    ● ● ● 7    ● ● ● 8

# Spring Chinook 3711A

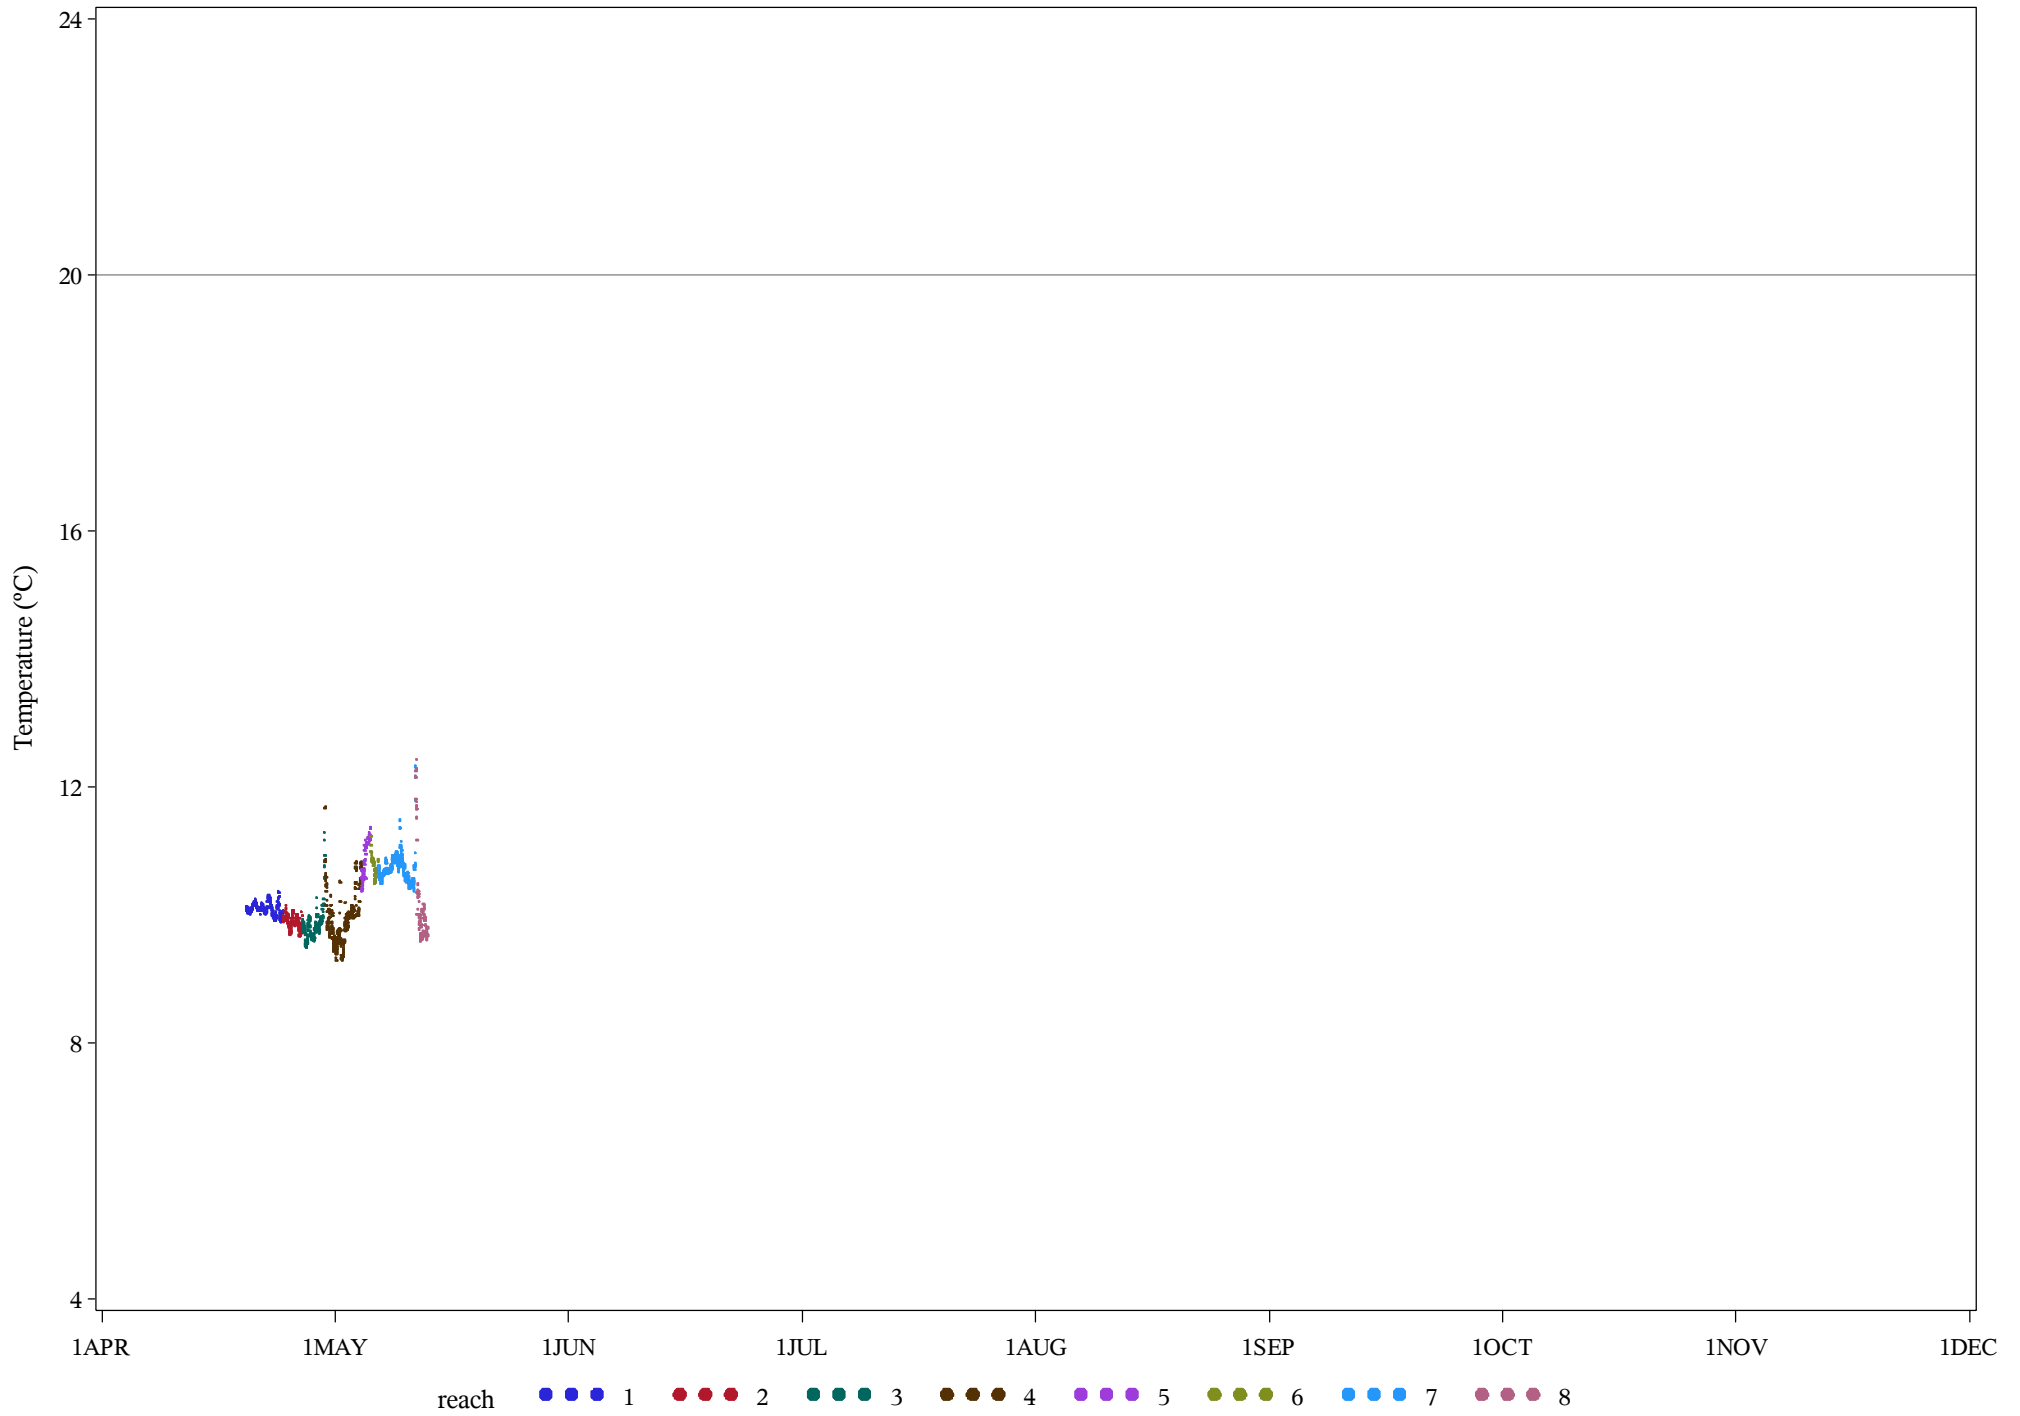

# Spring Chinook 3718A

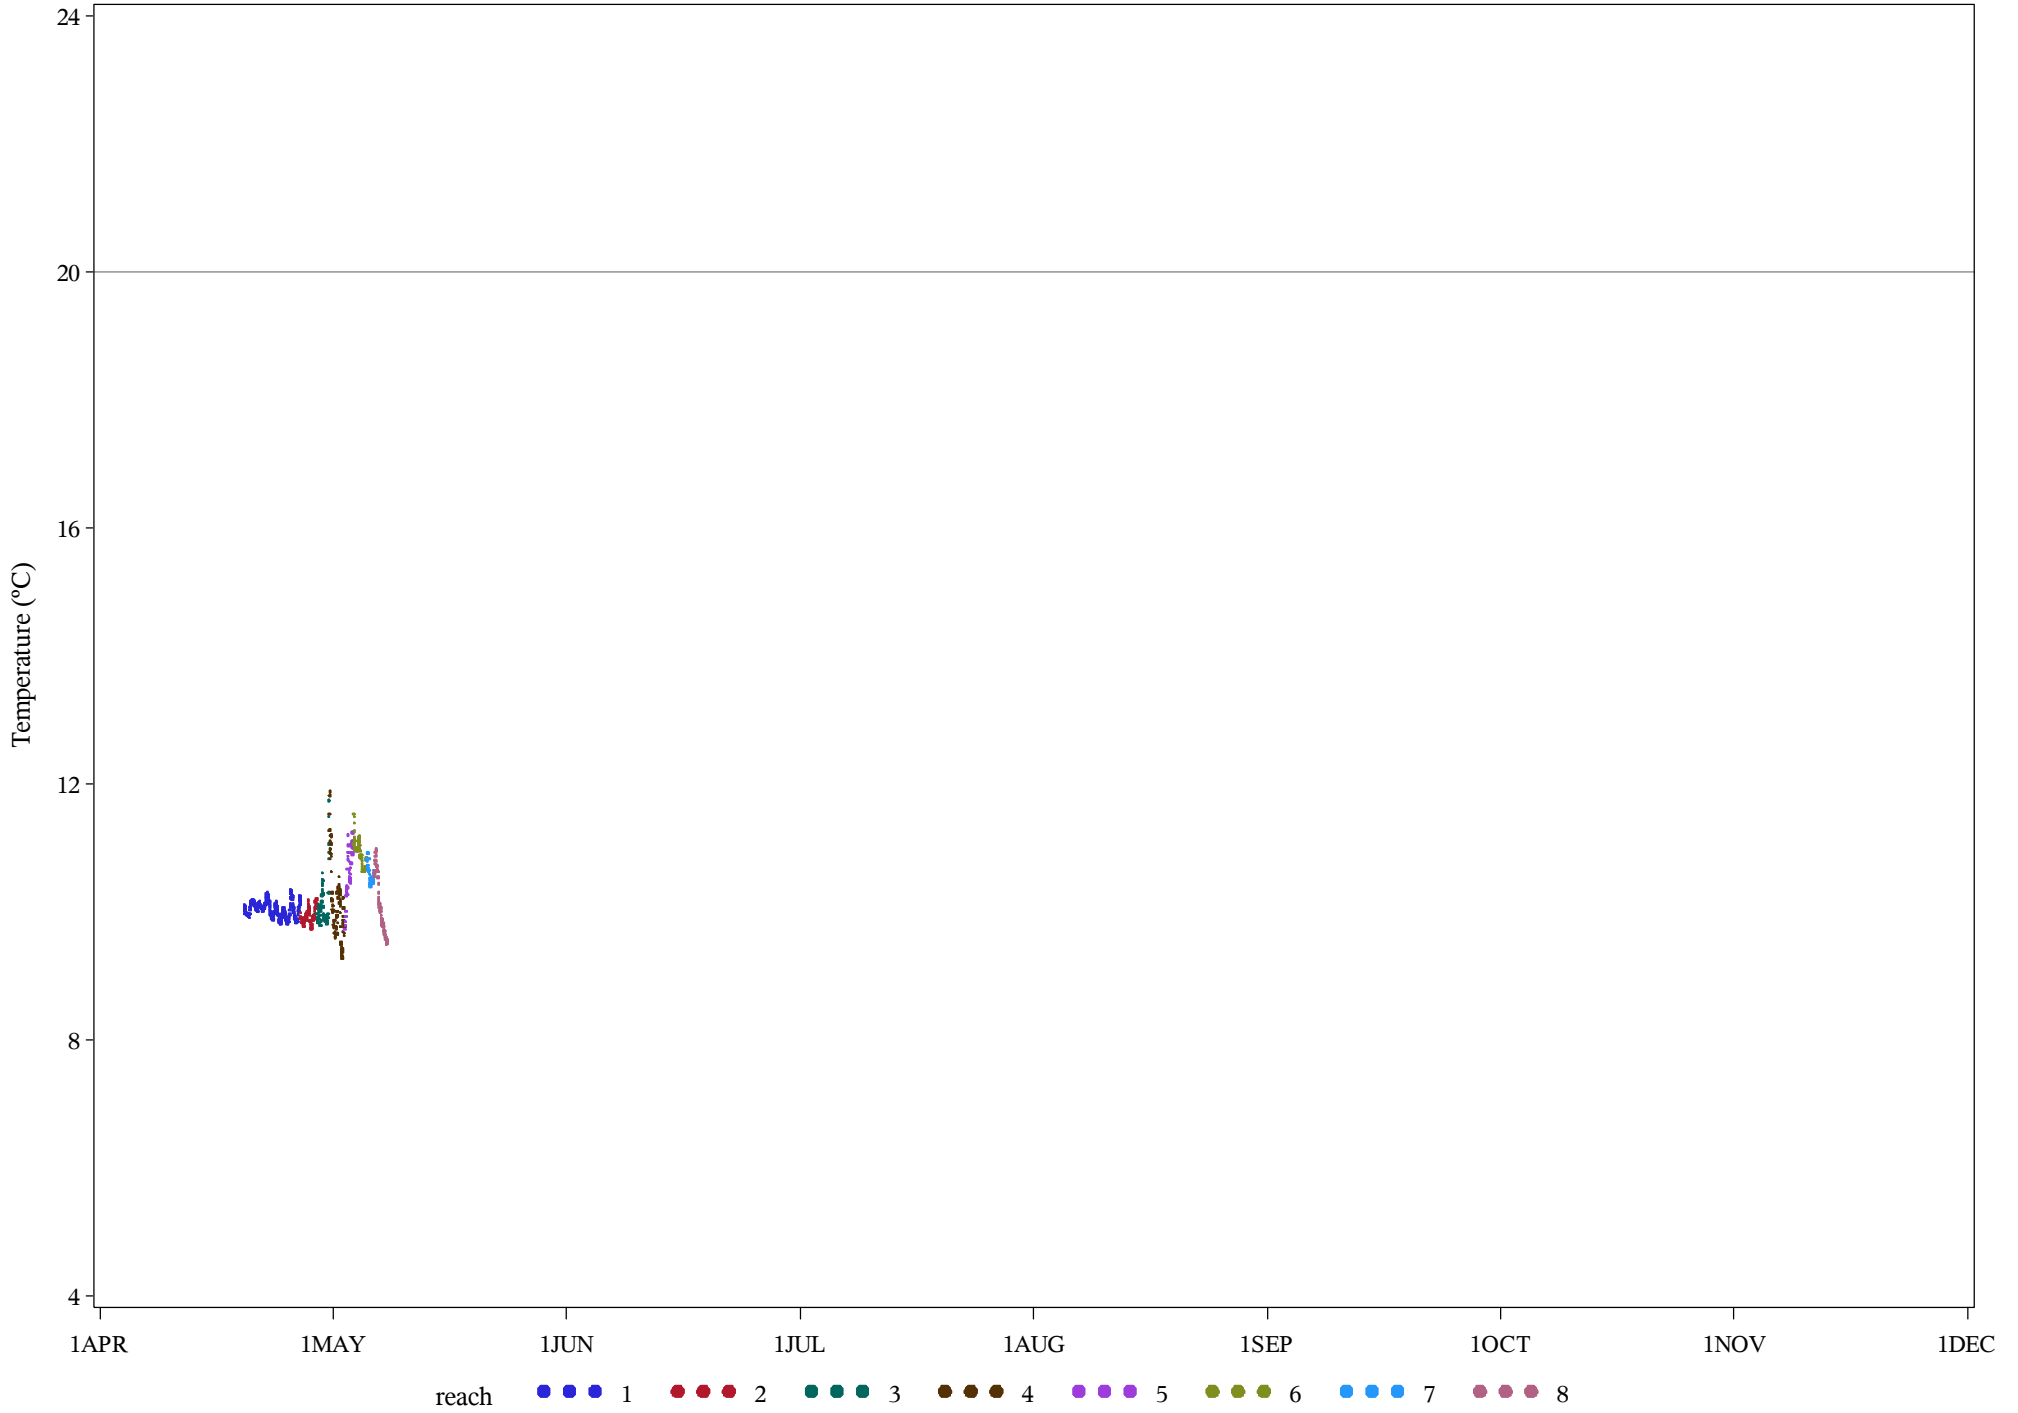

# Spring Chinook 3725A

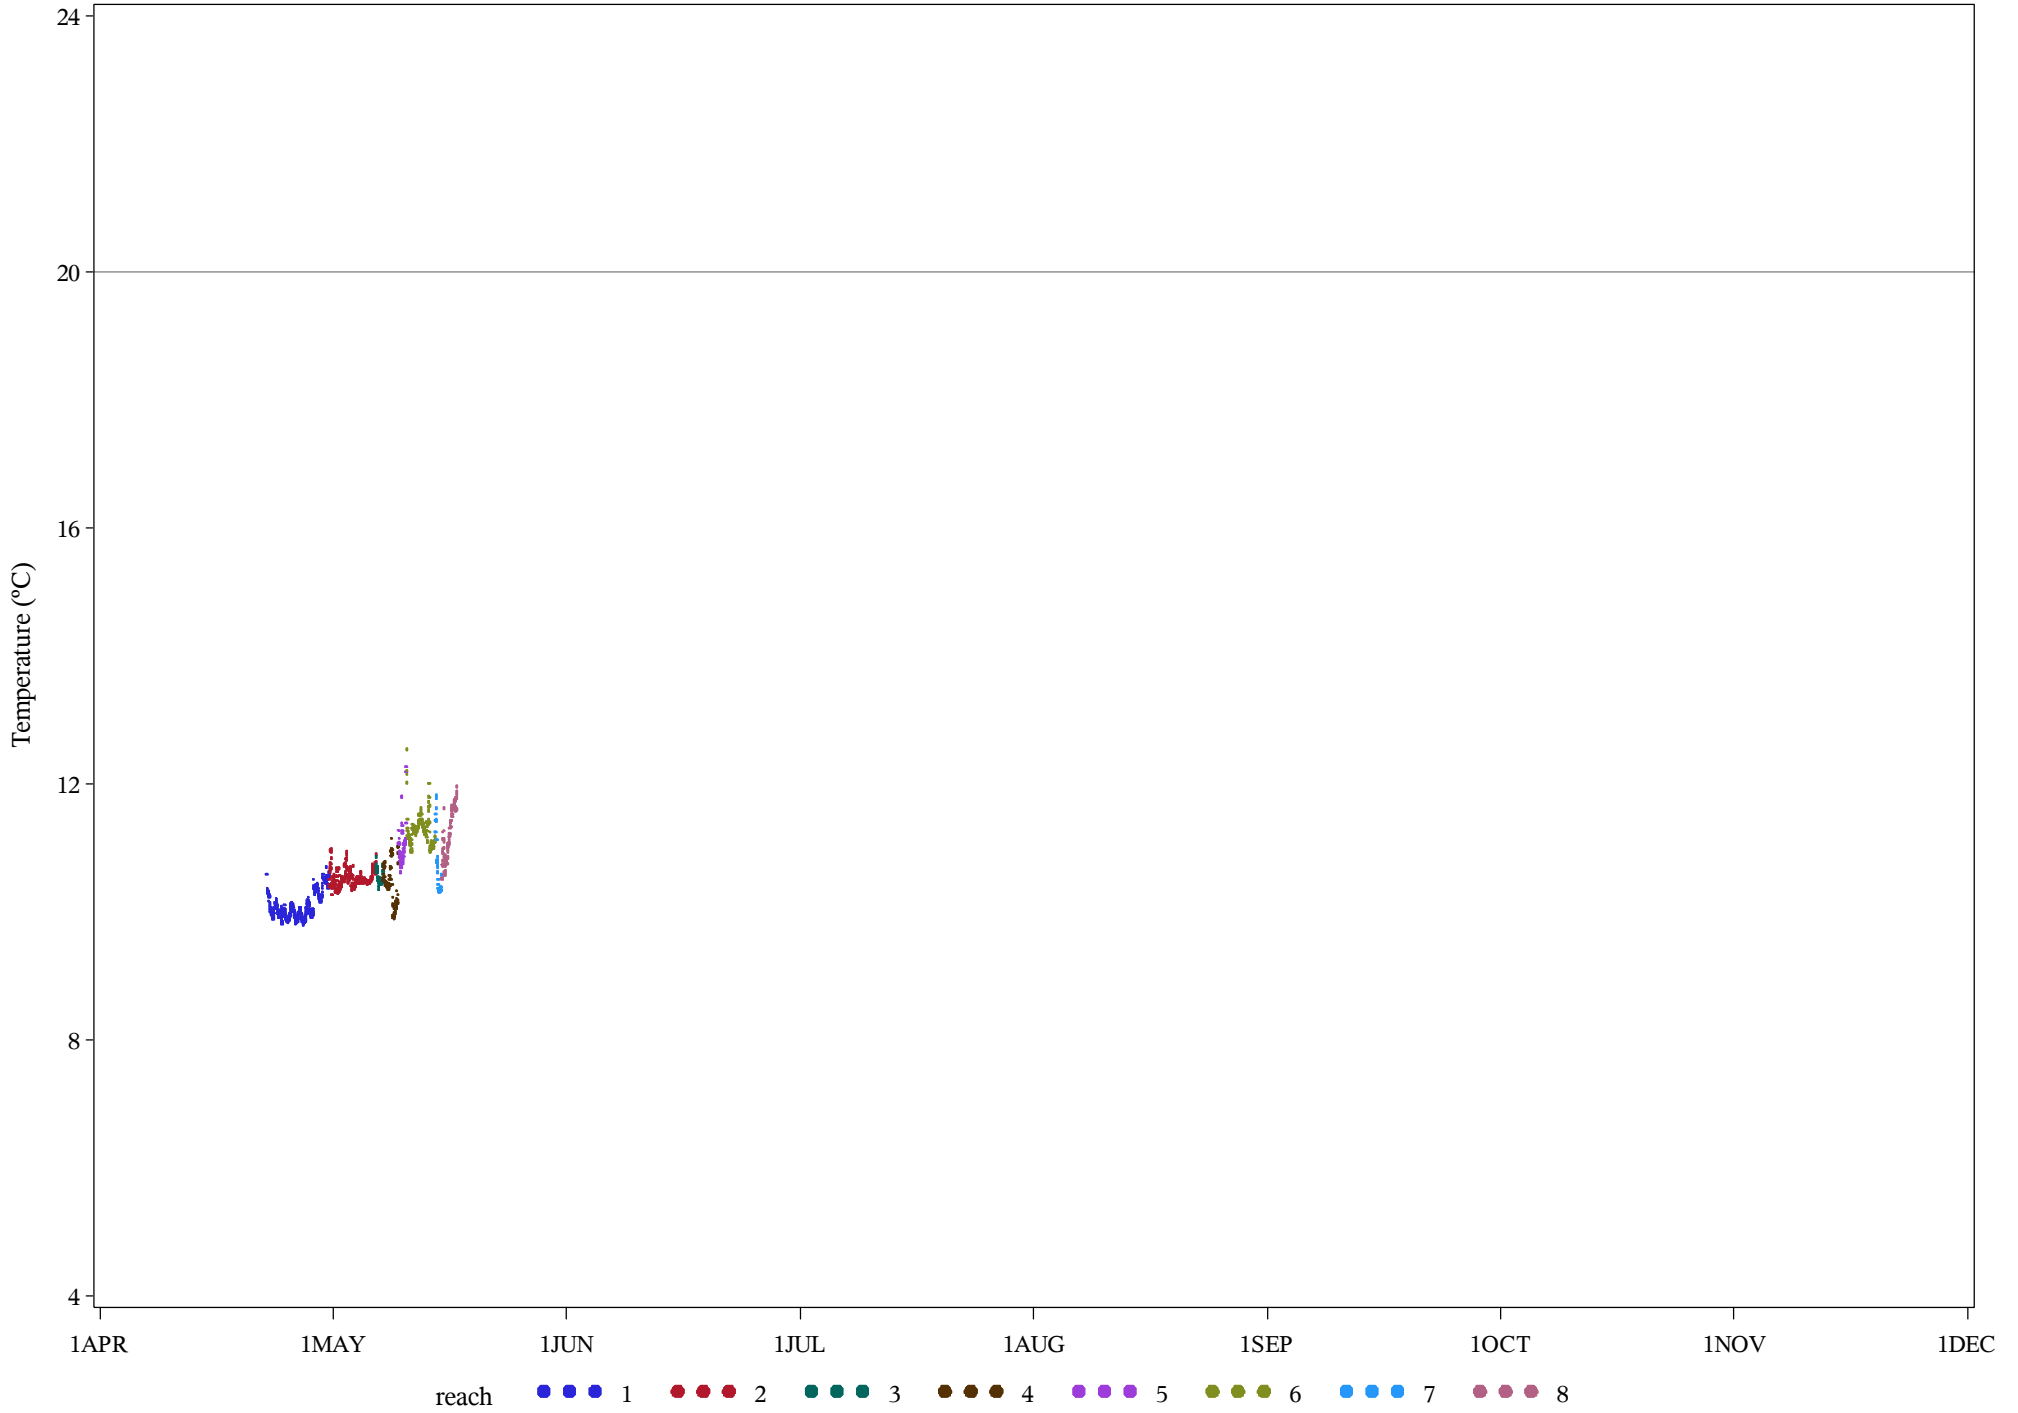



# Spring Chinook 3729A

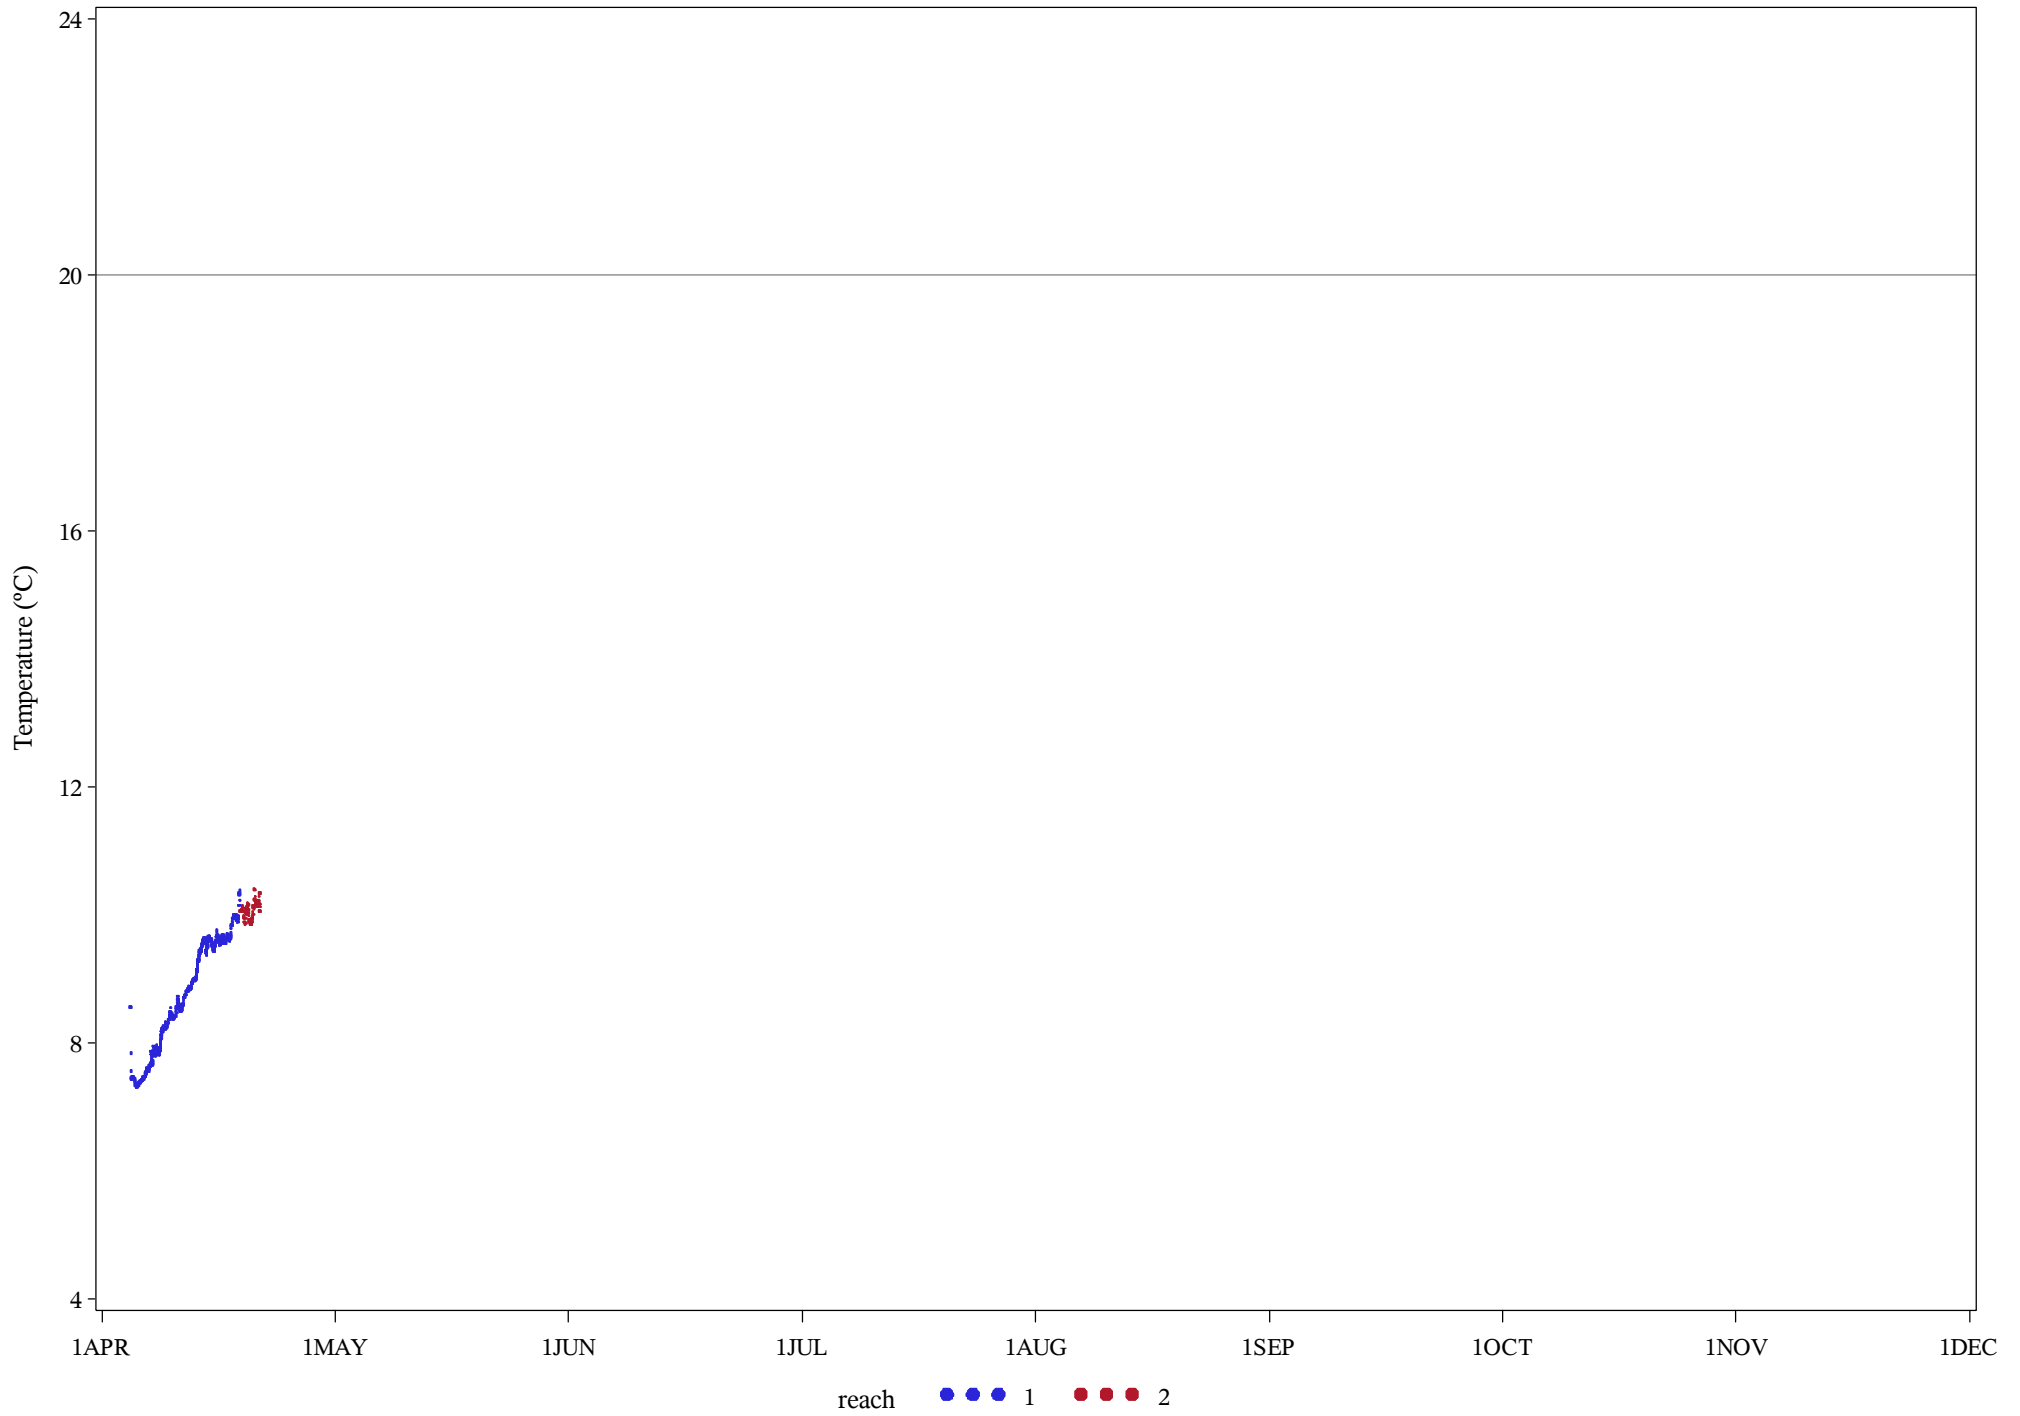



# Spring Chinook 3761A

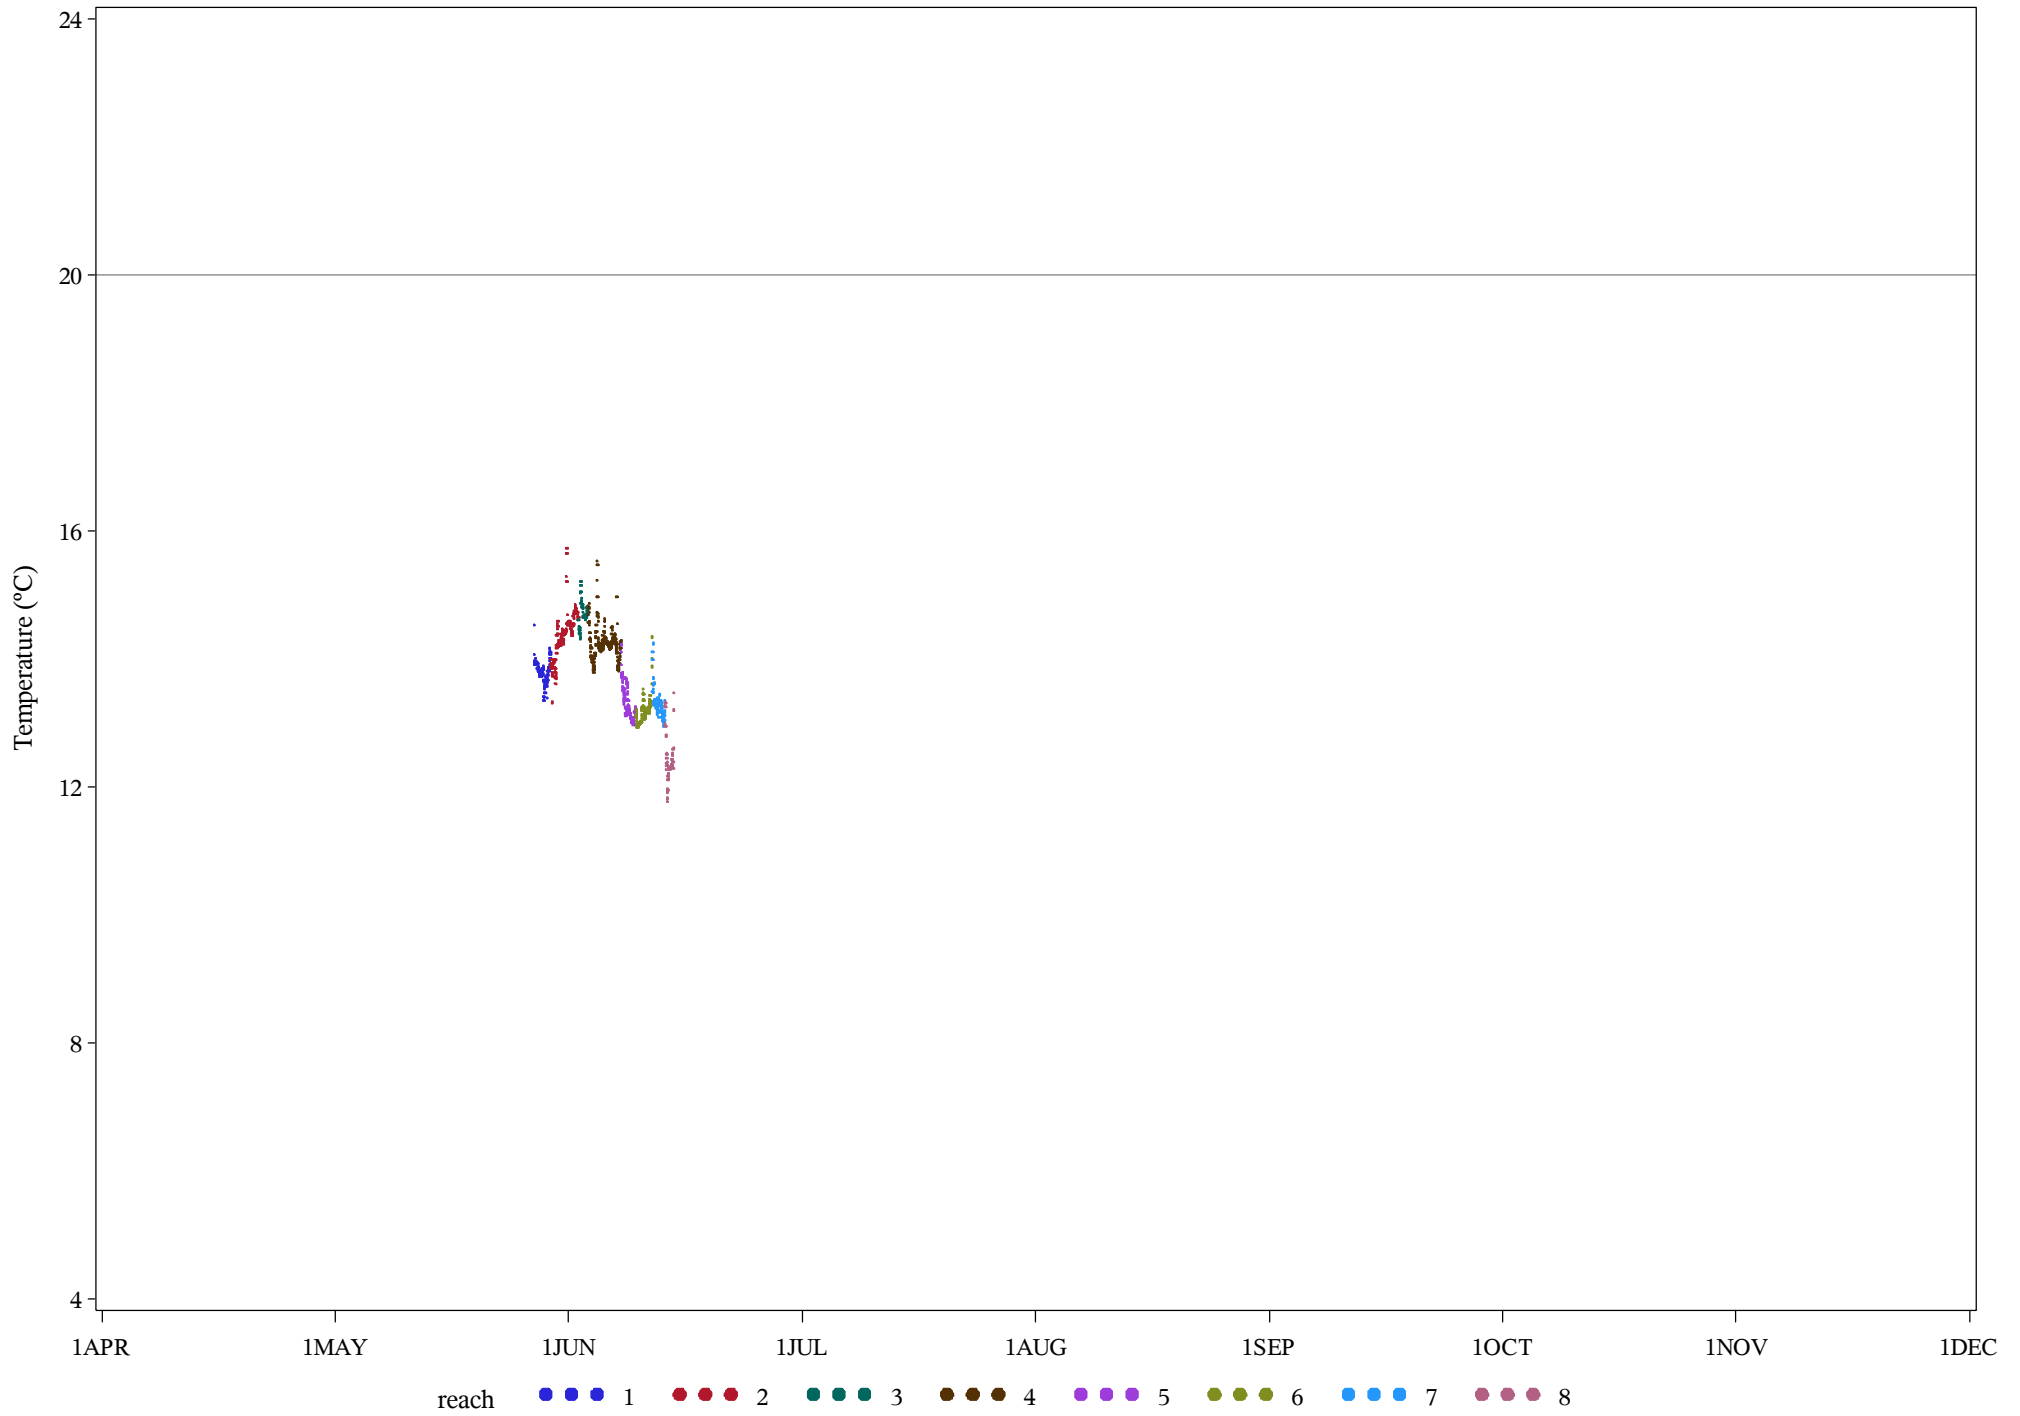



# Spring Chinook 3765A

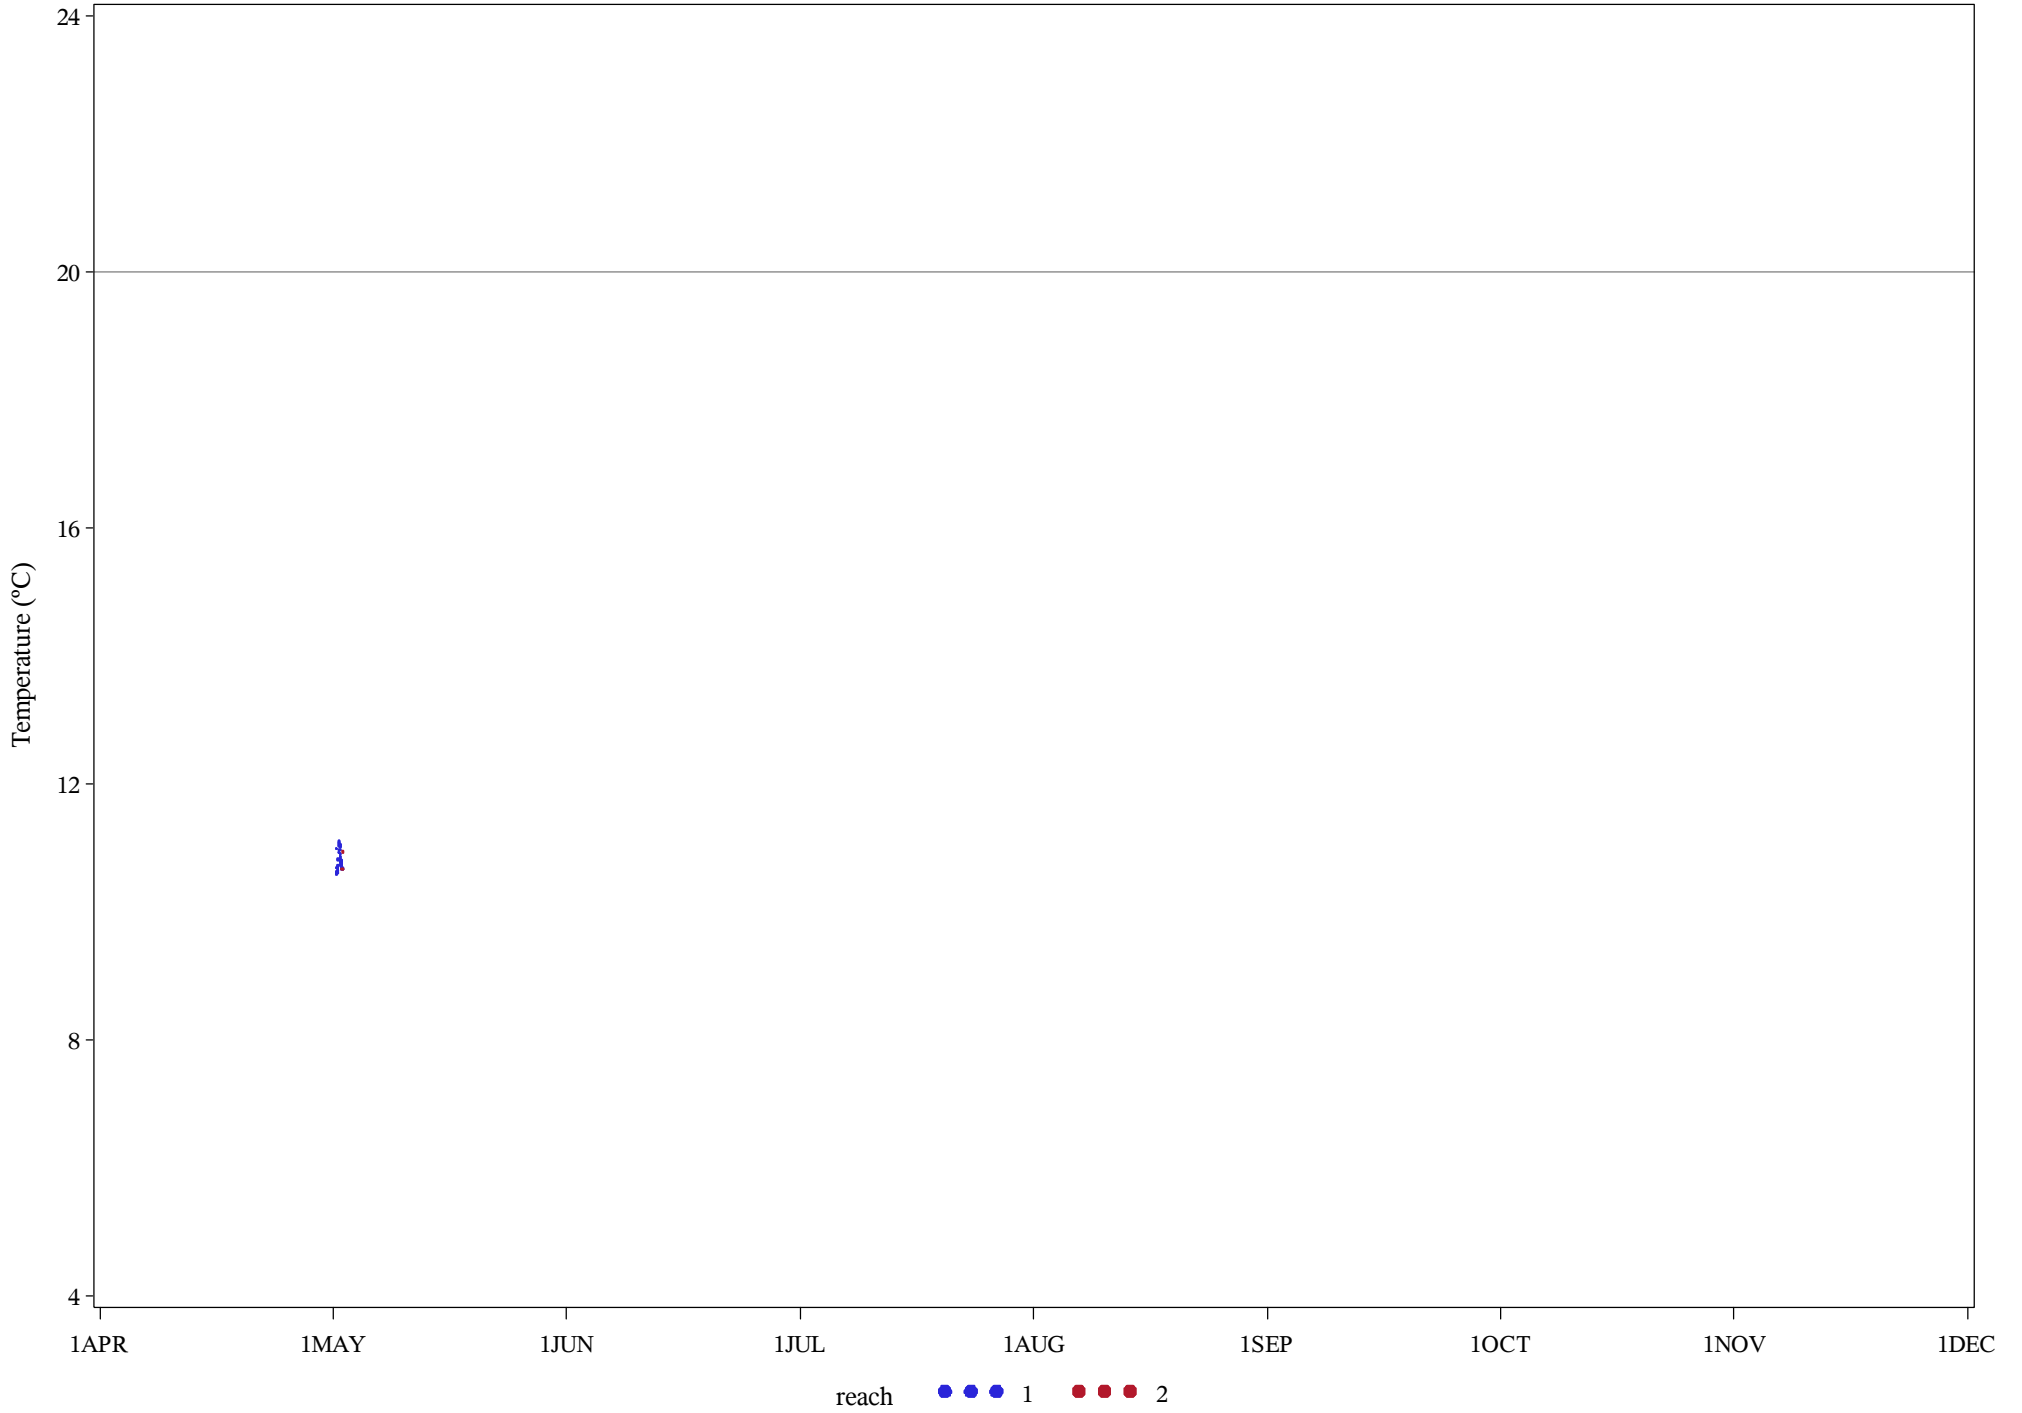

# Spring Chinook 3768A

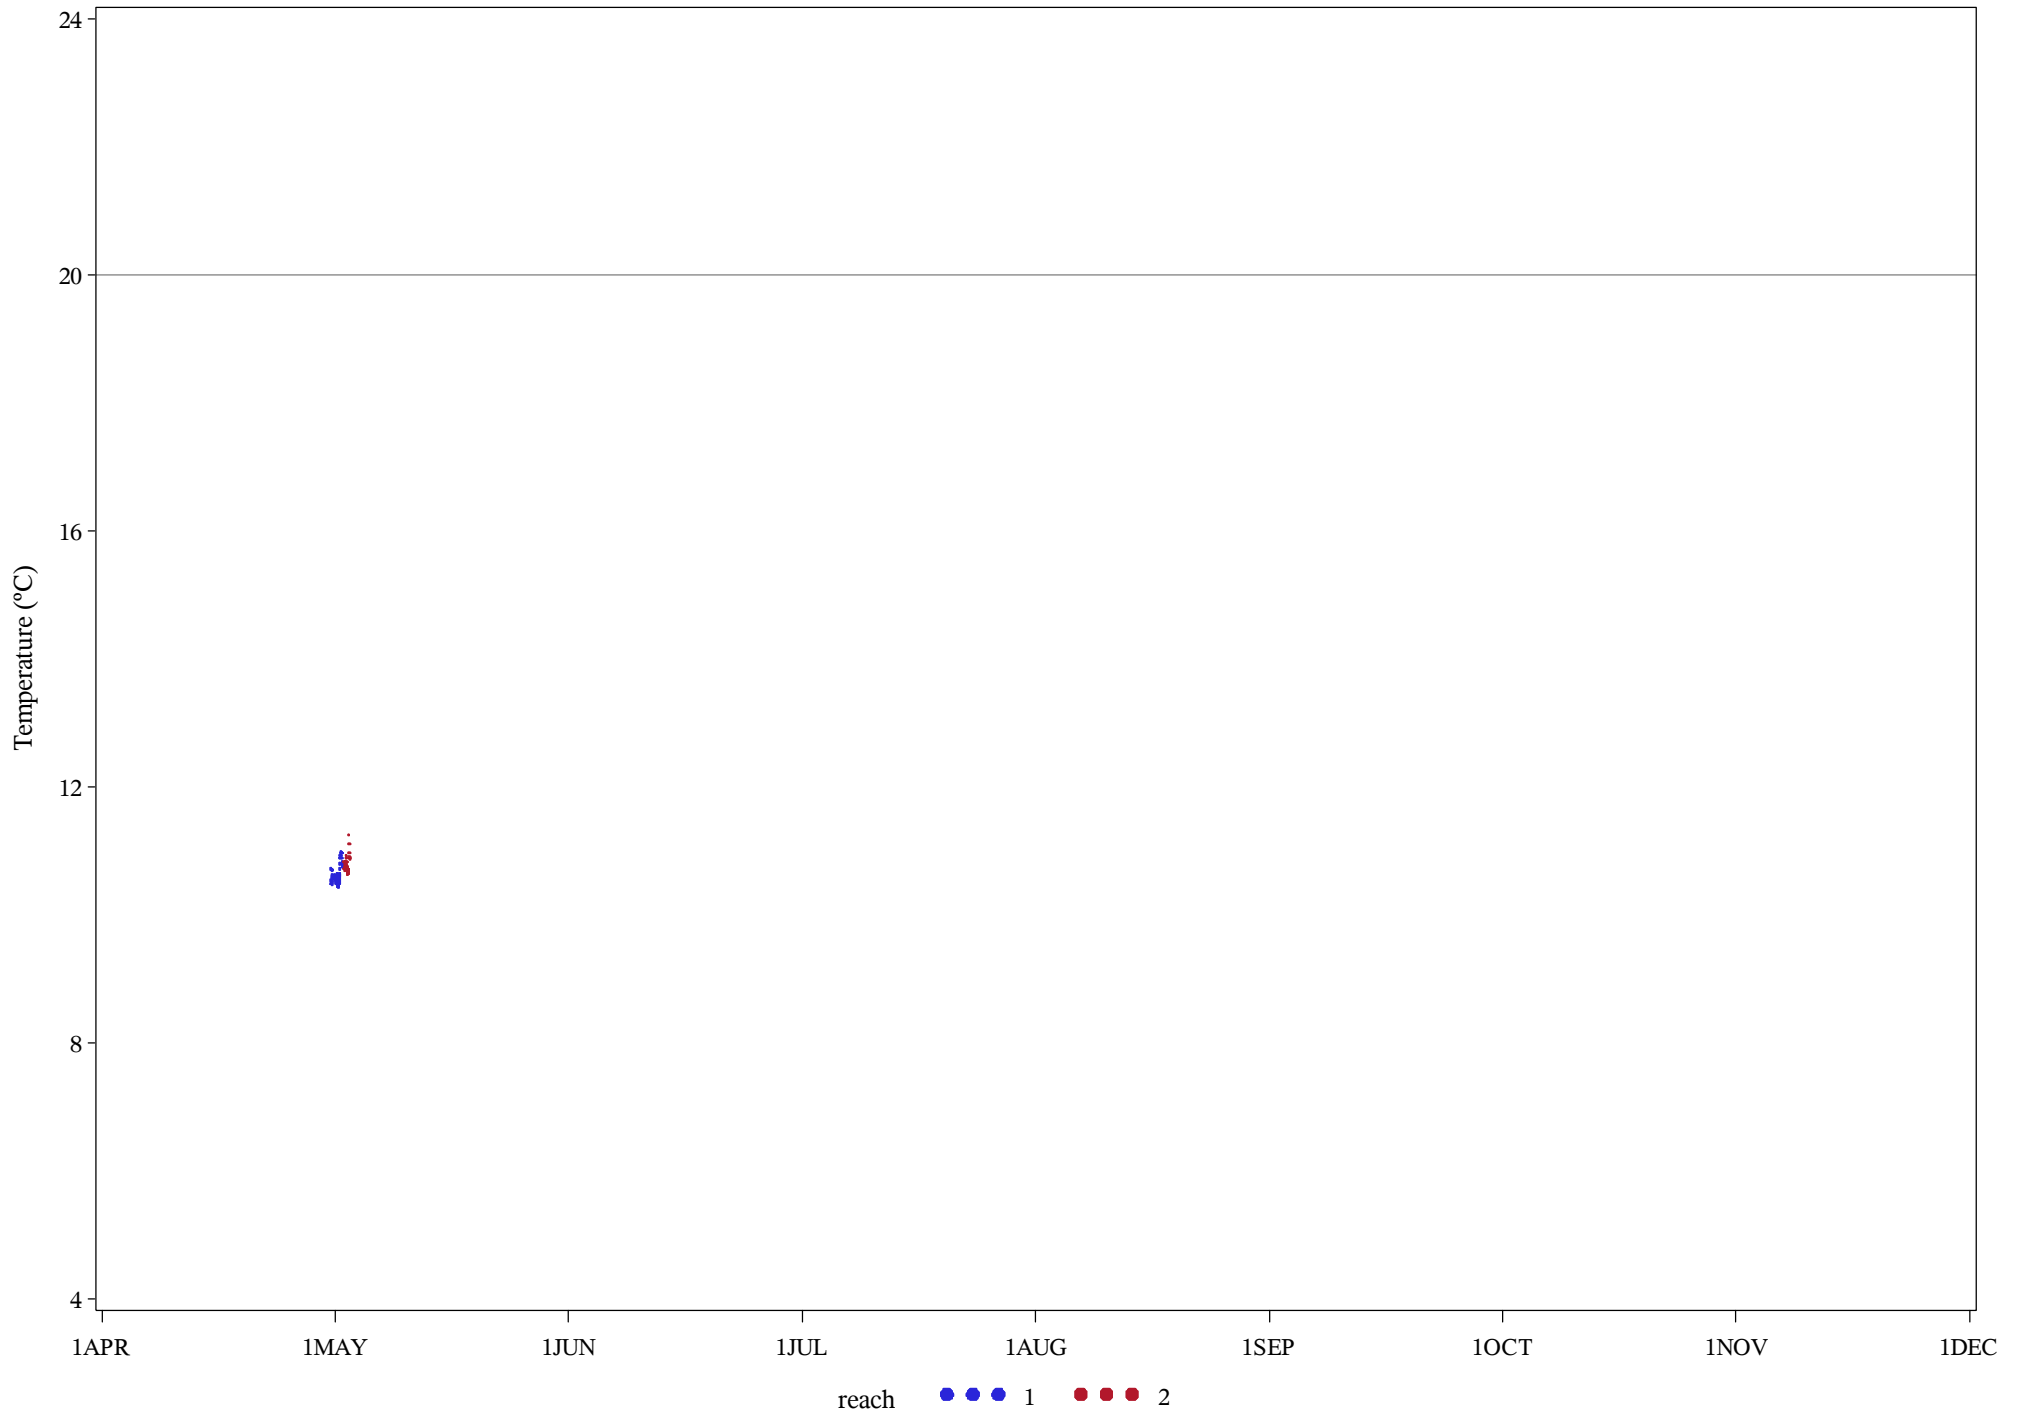

# Spring Chinook 3769A

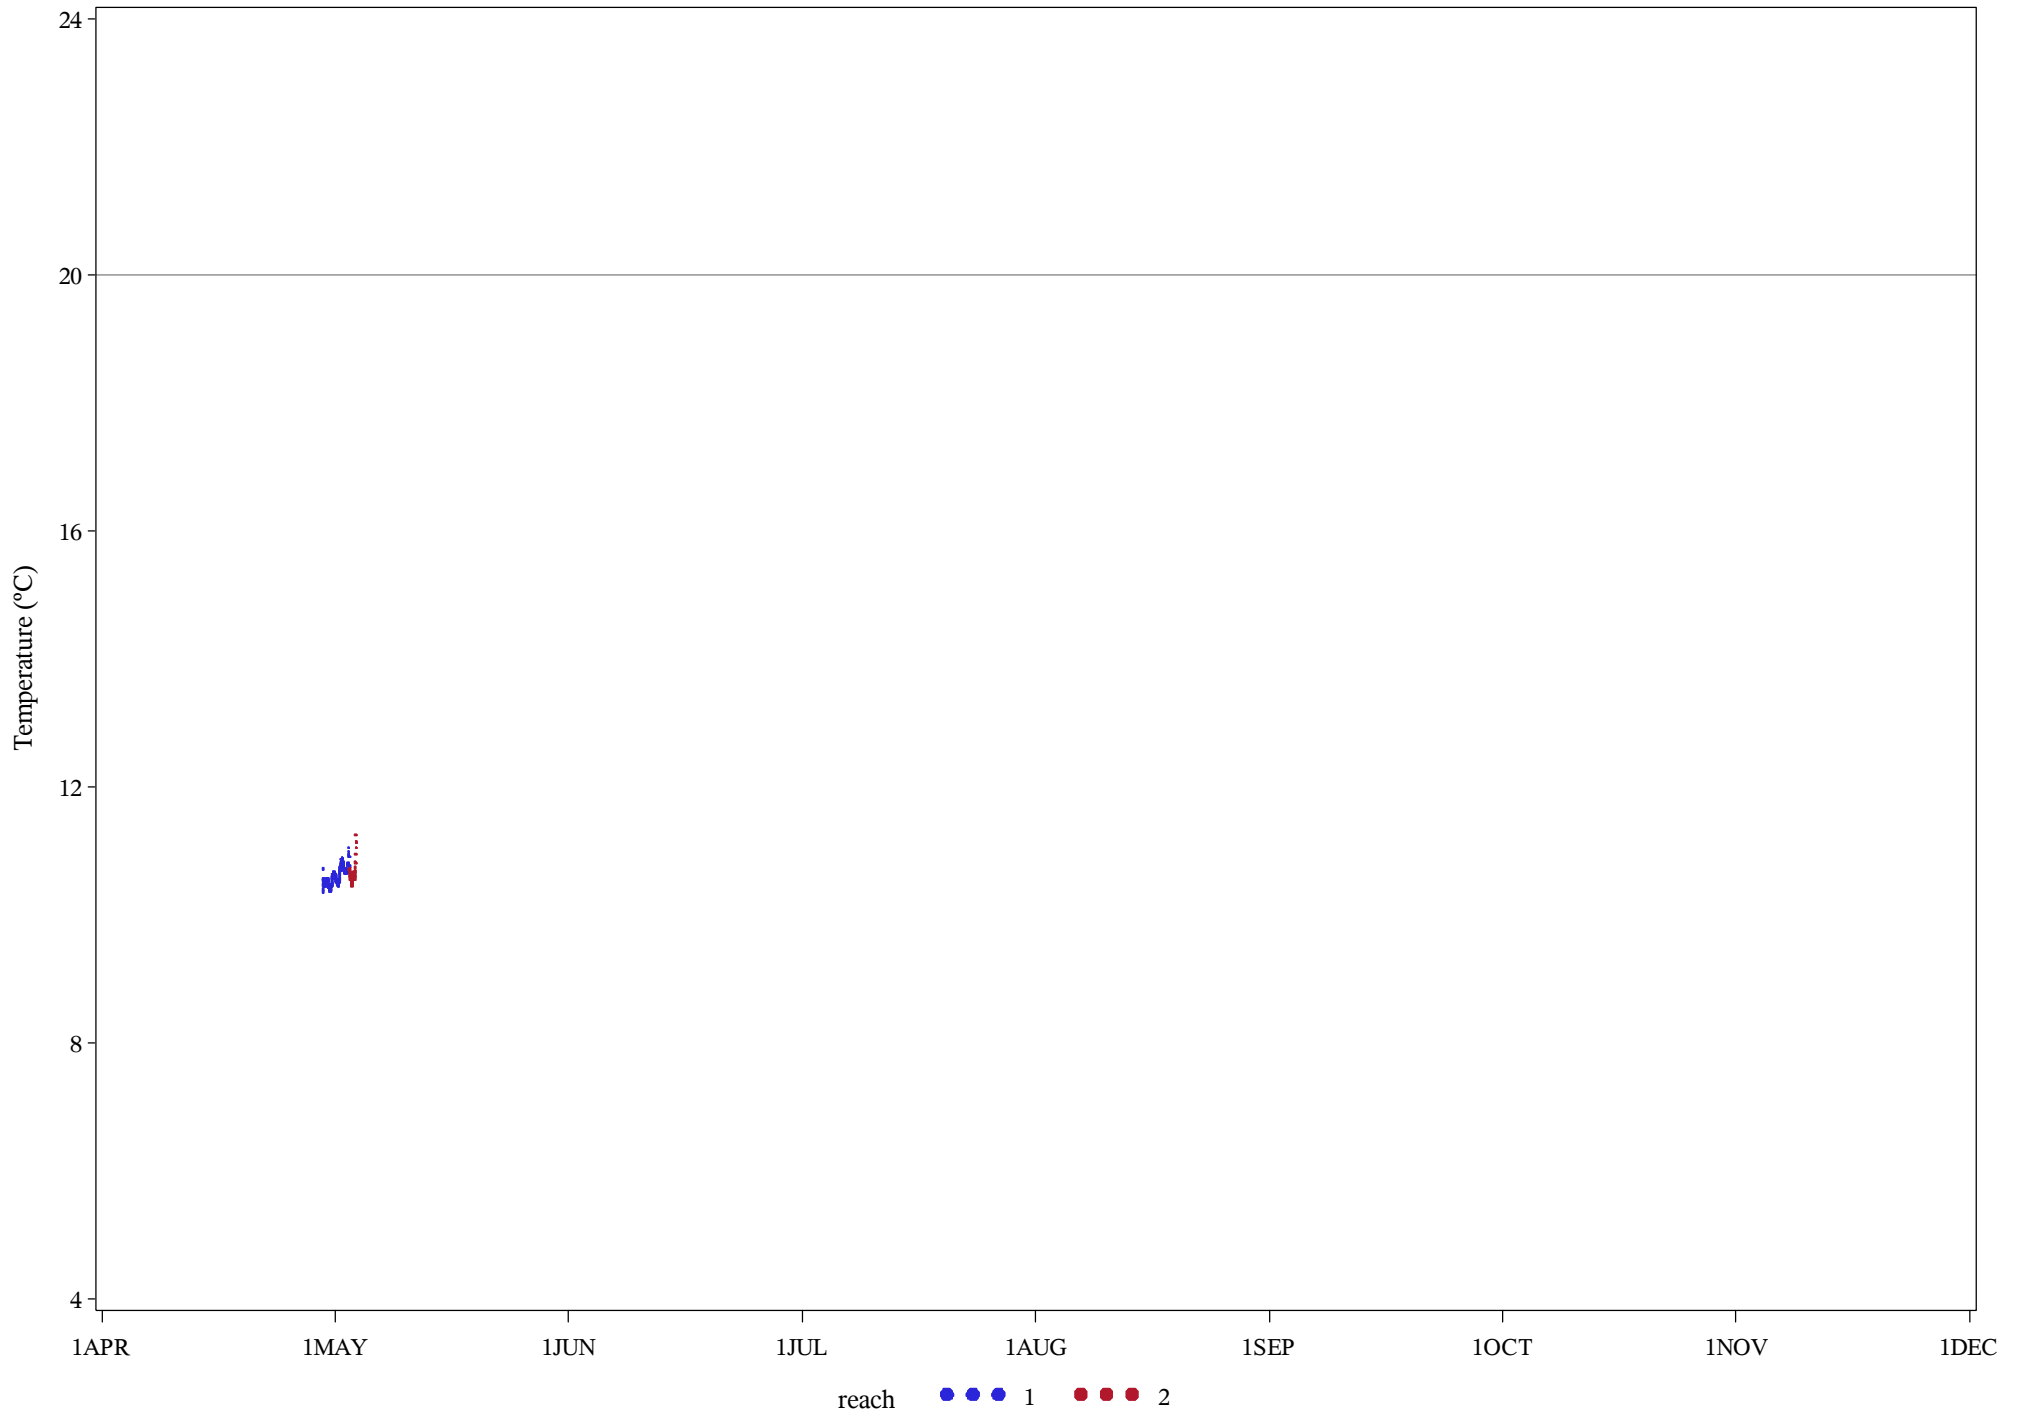



# Spring Chinook 3773A

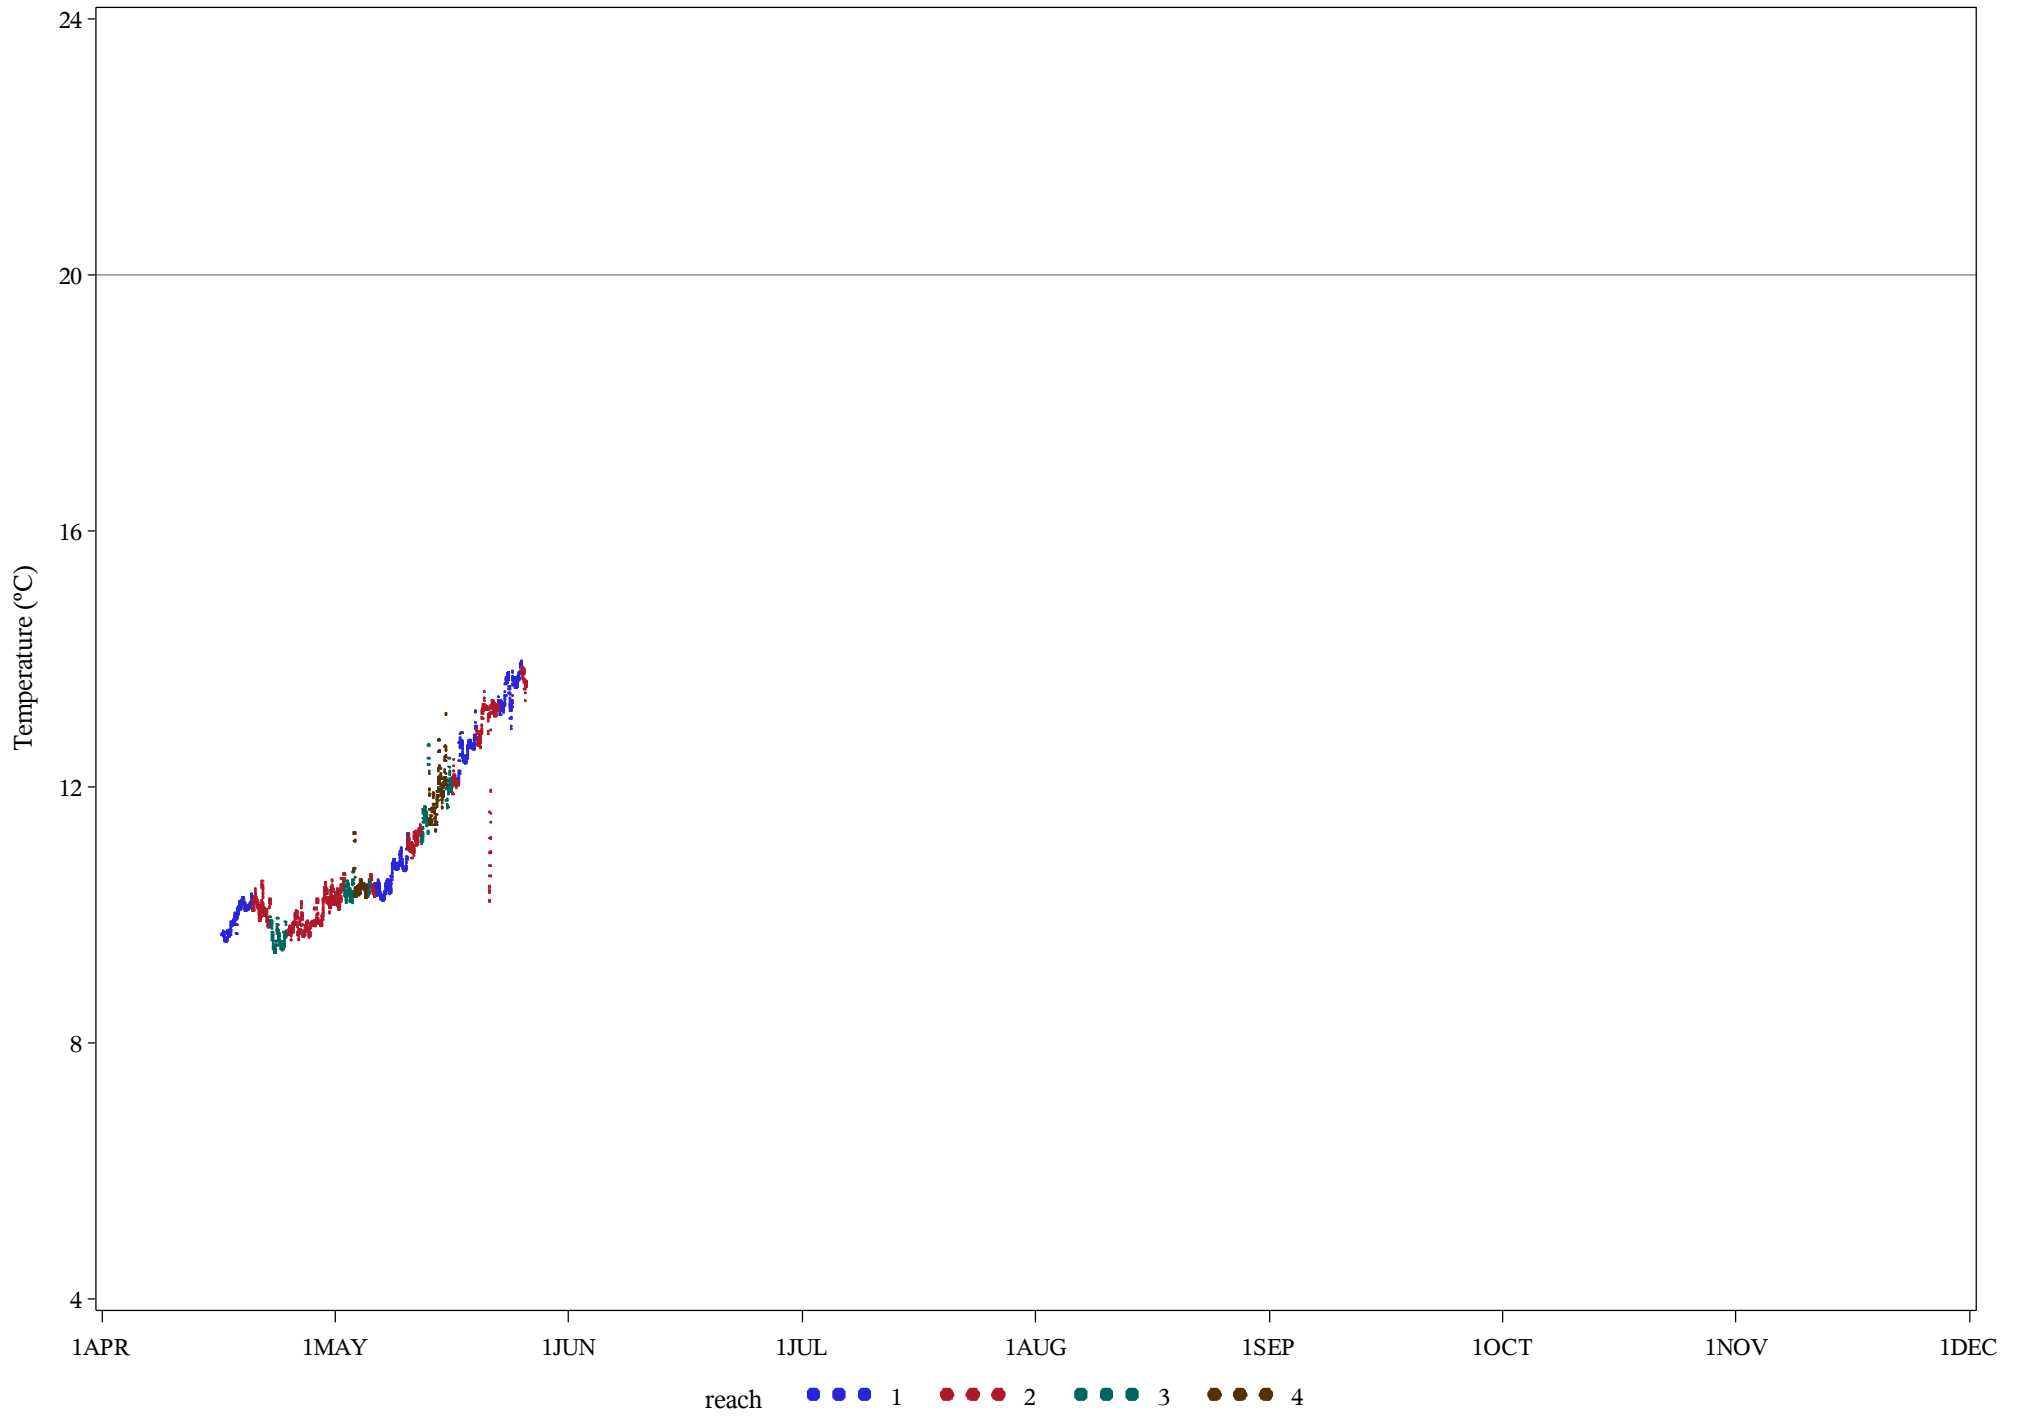

# Spring Chinook 3777A

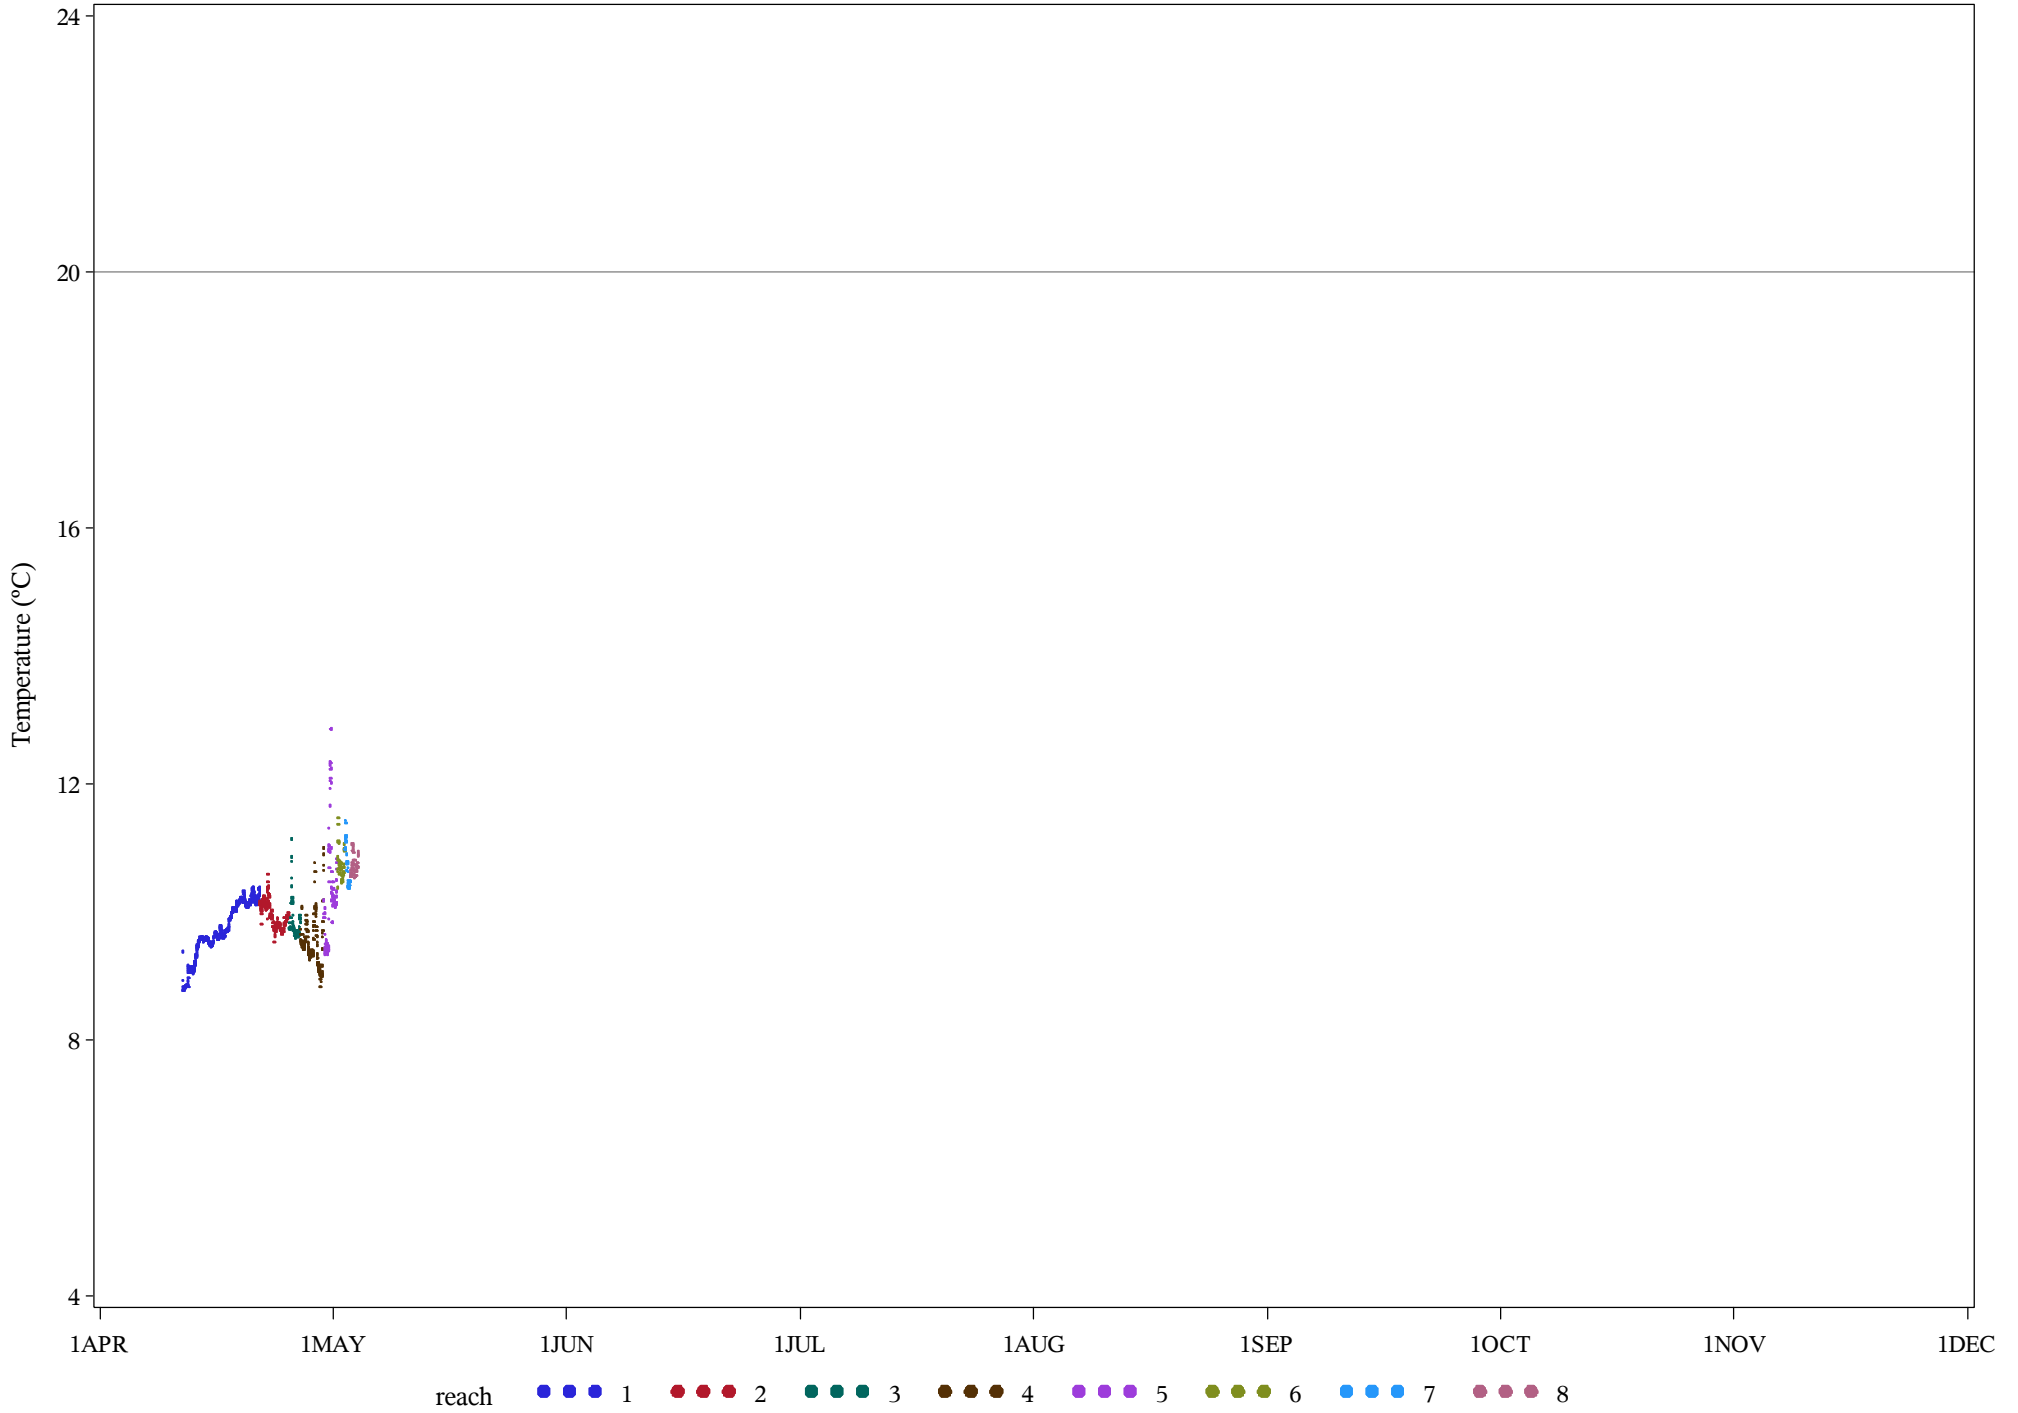

# Spring Chinook 3781A

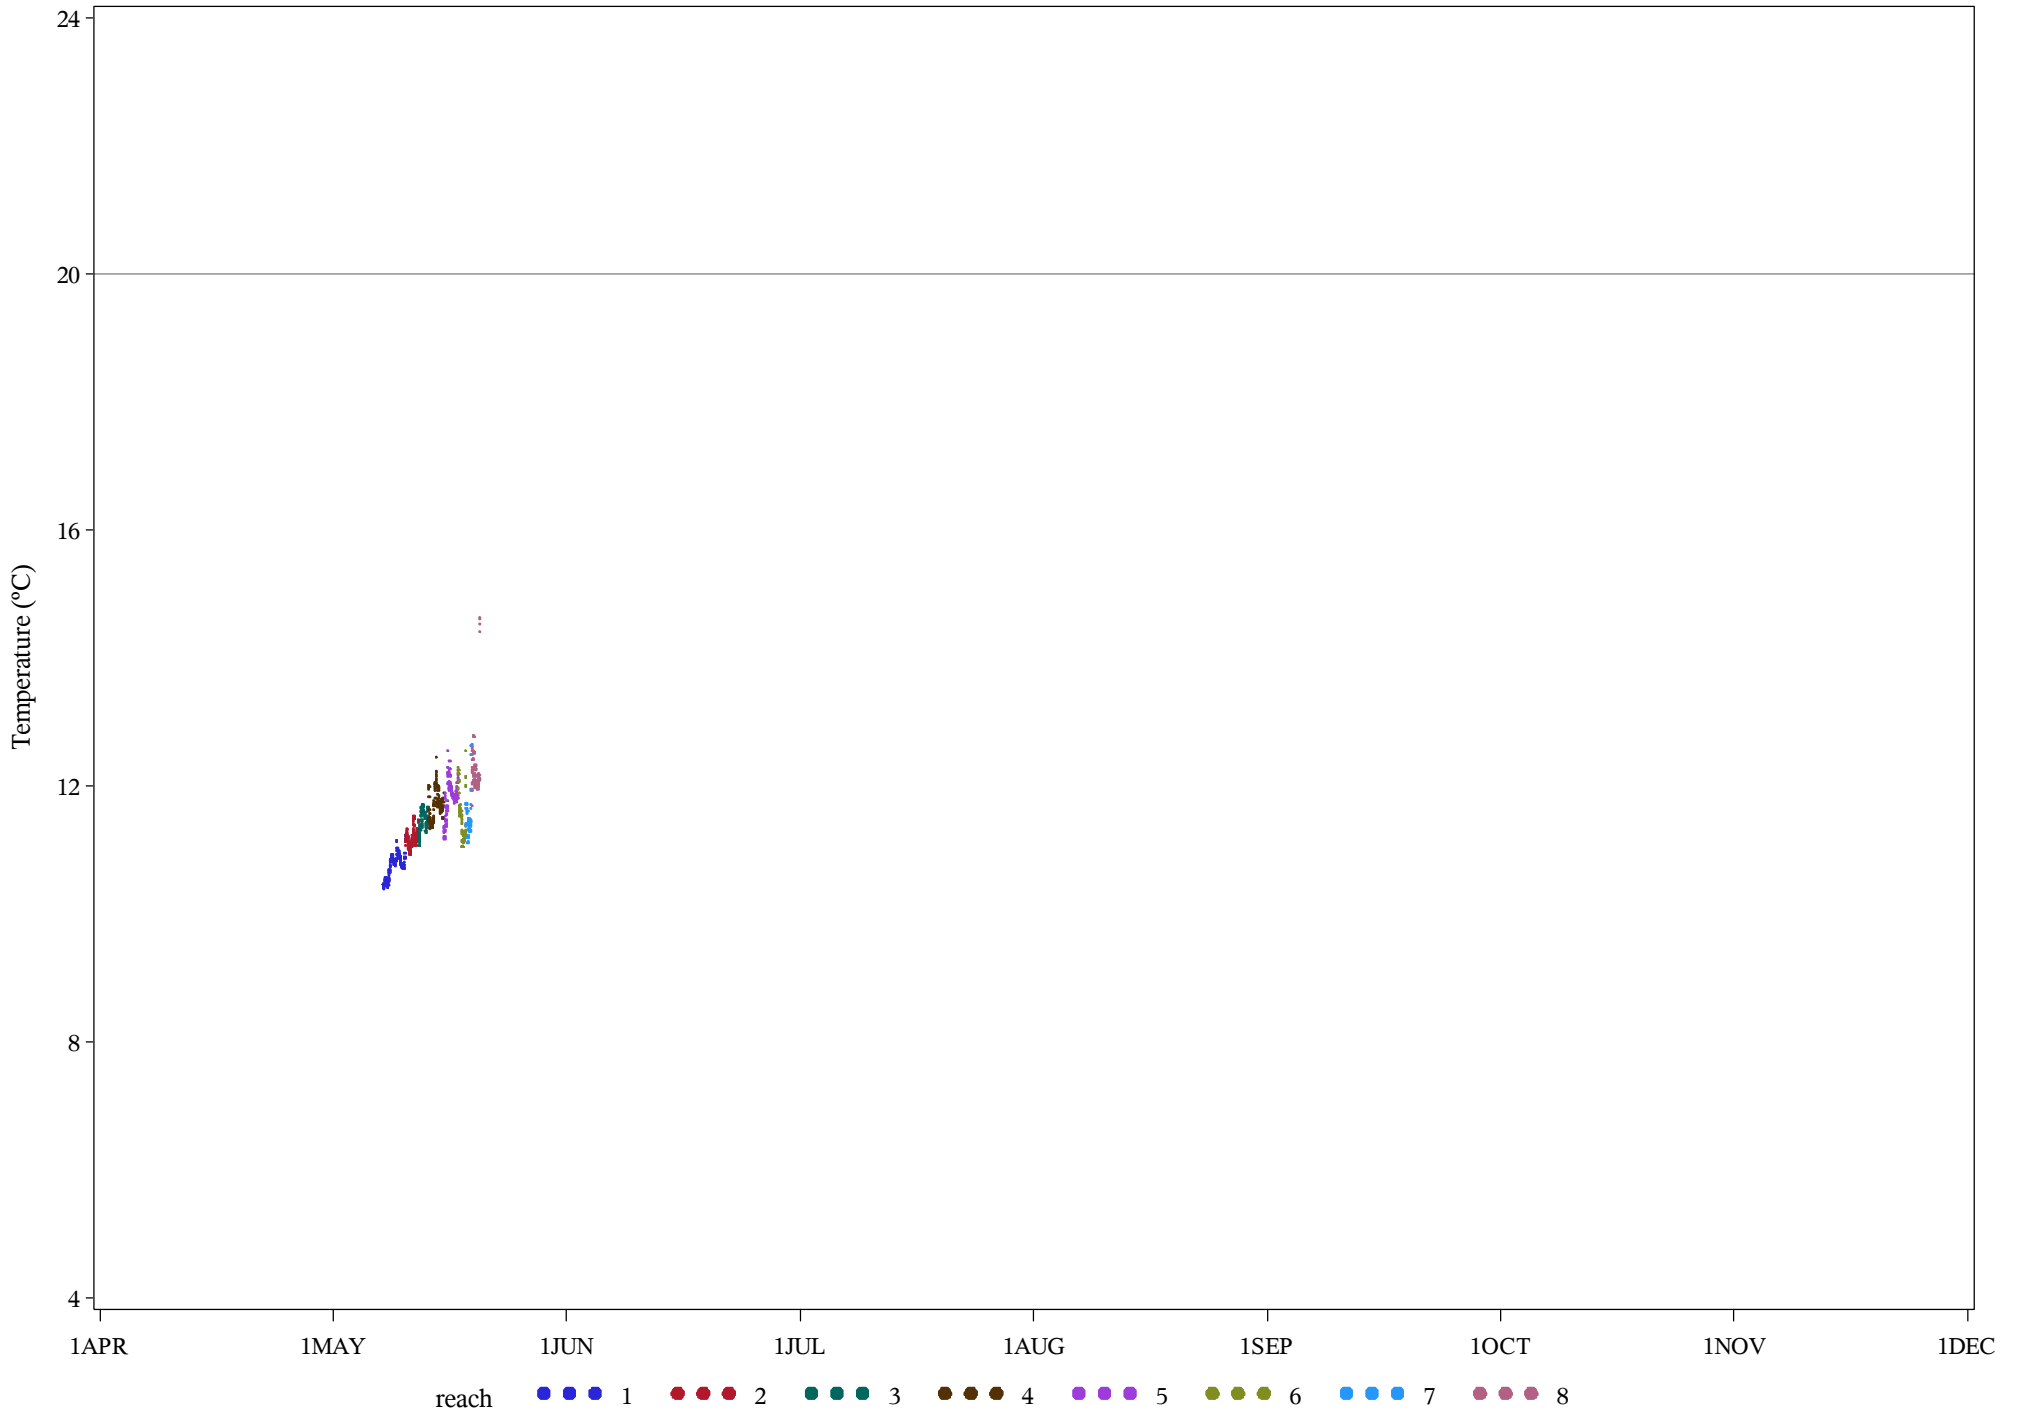







# Spring Chinook 3790A

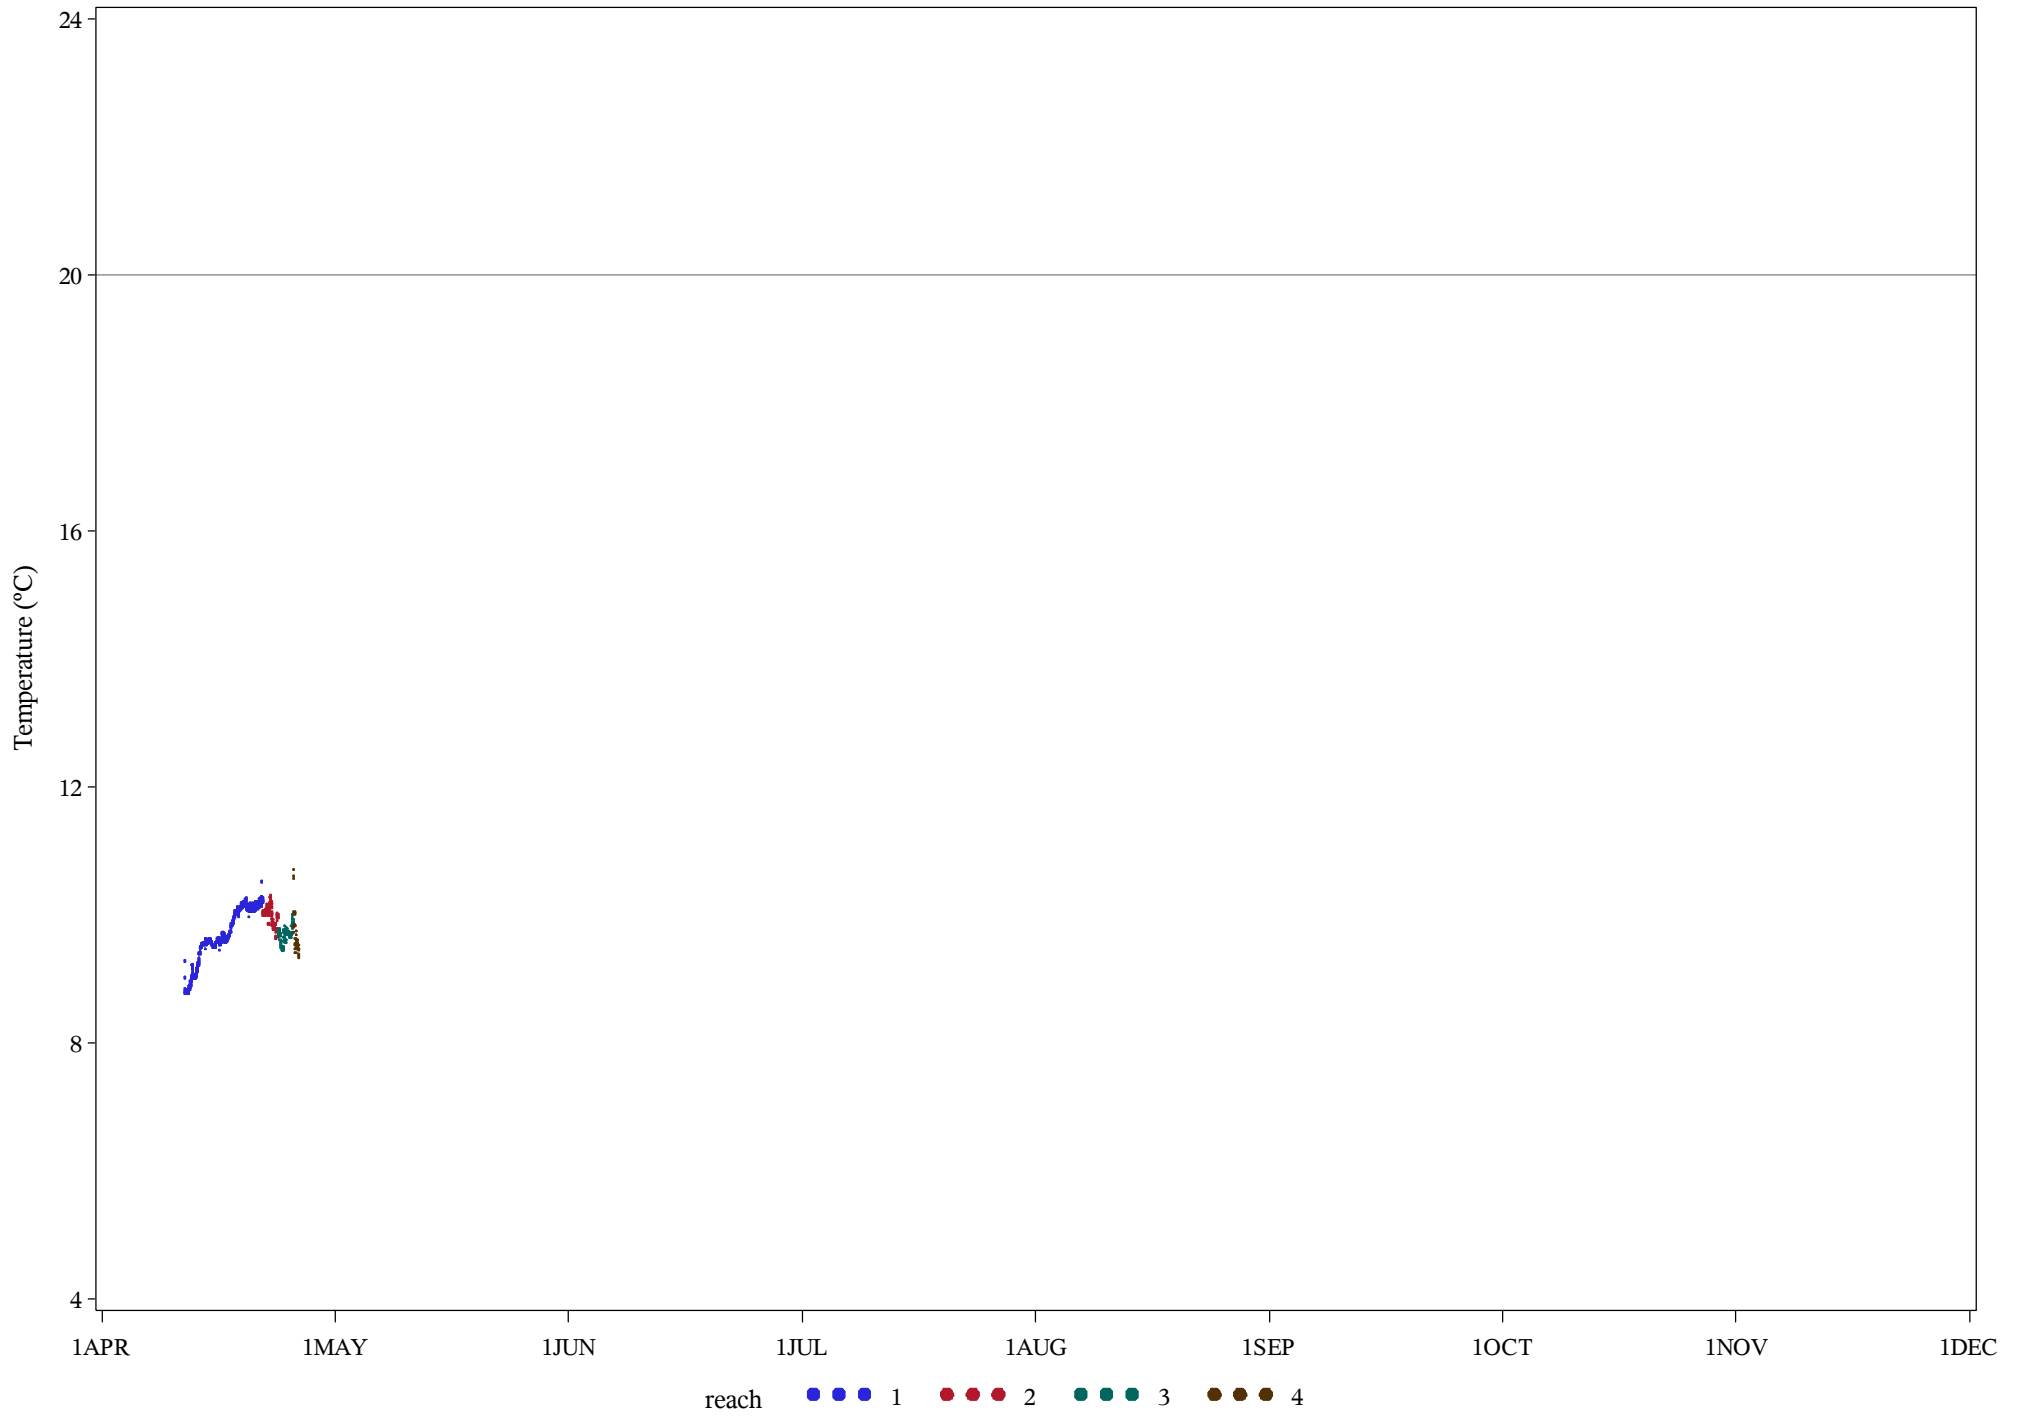



# Spring Chinook 3805A

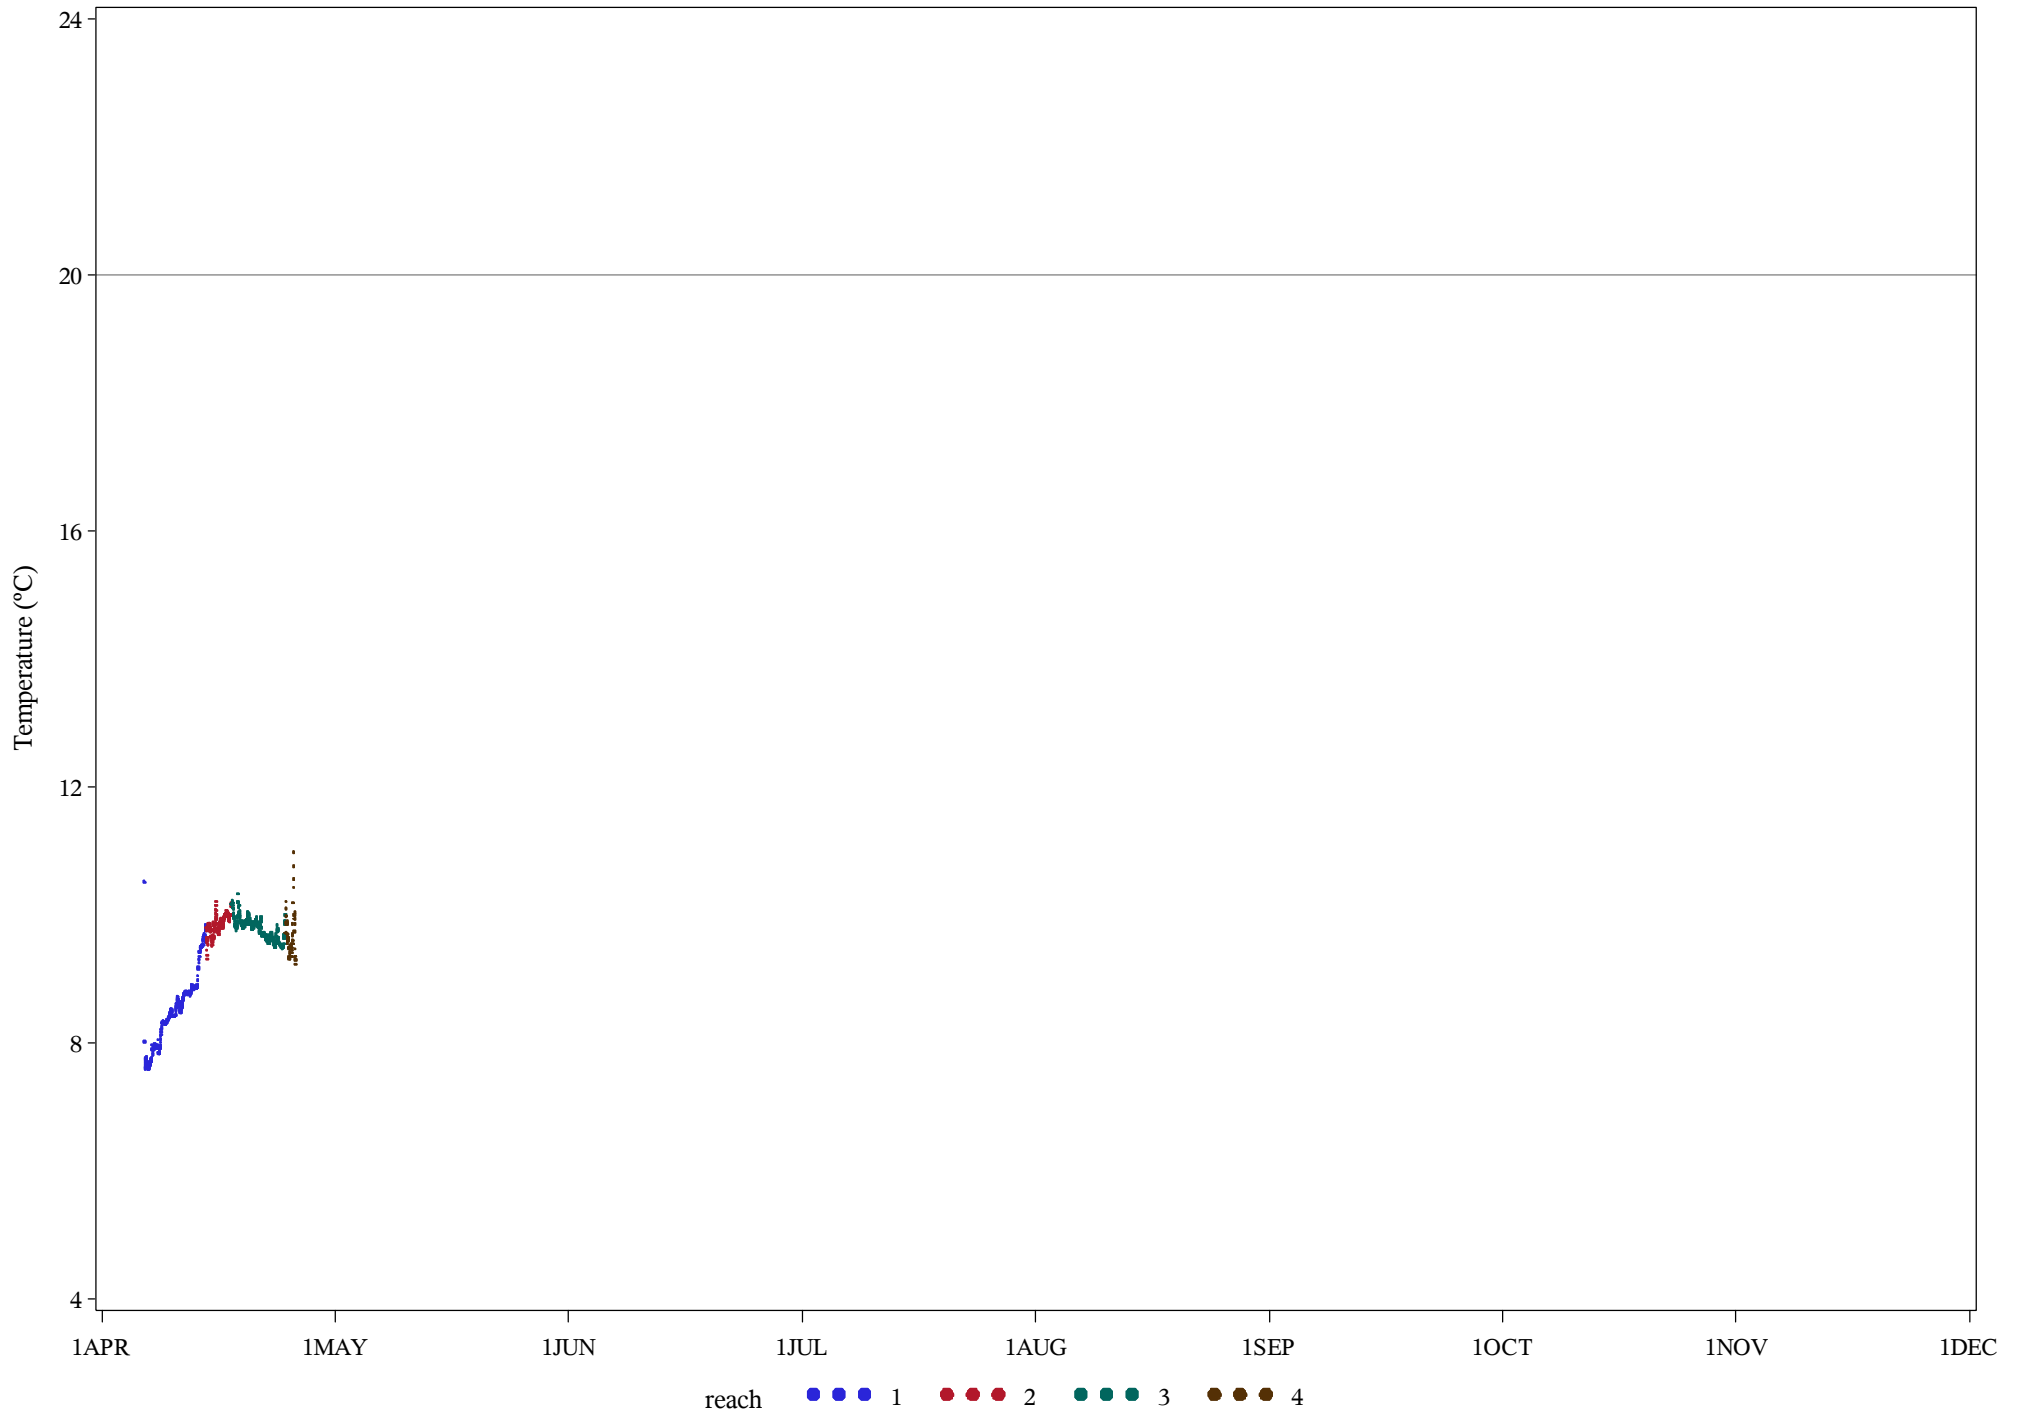

# Spring Chinook 3816A

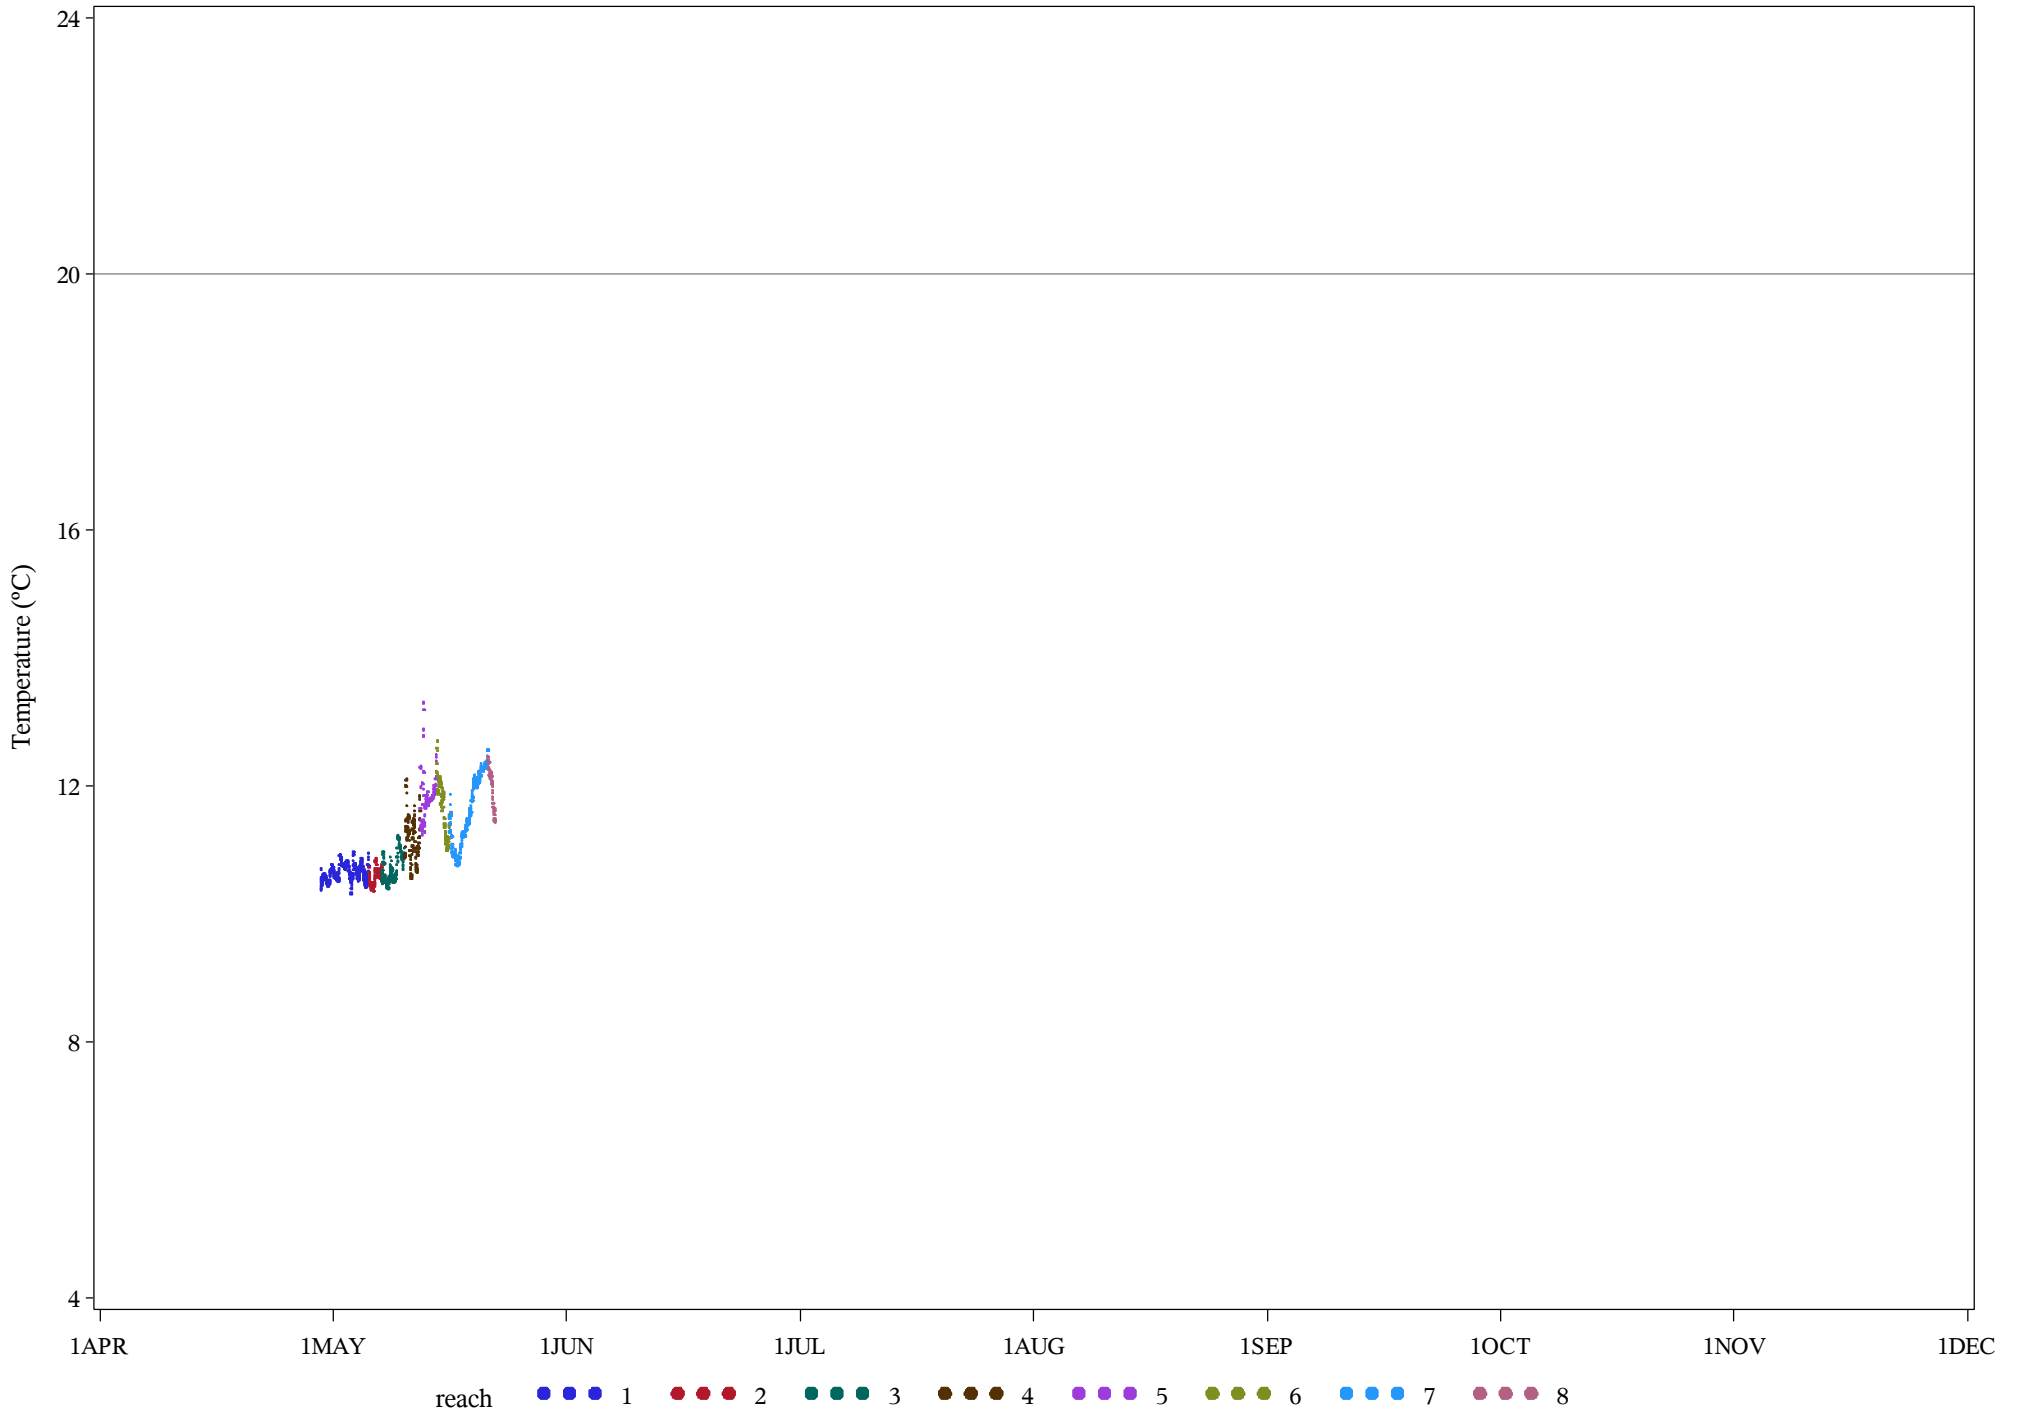

# Spring Chinook 3820A

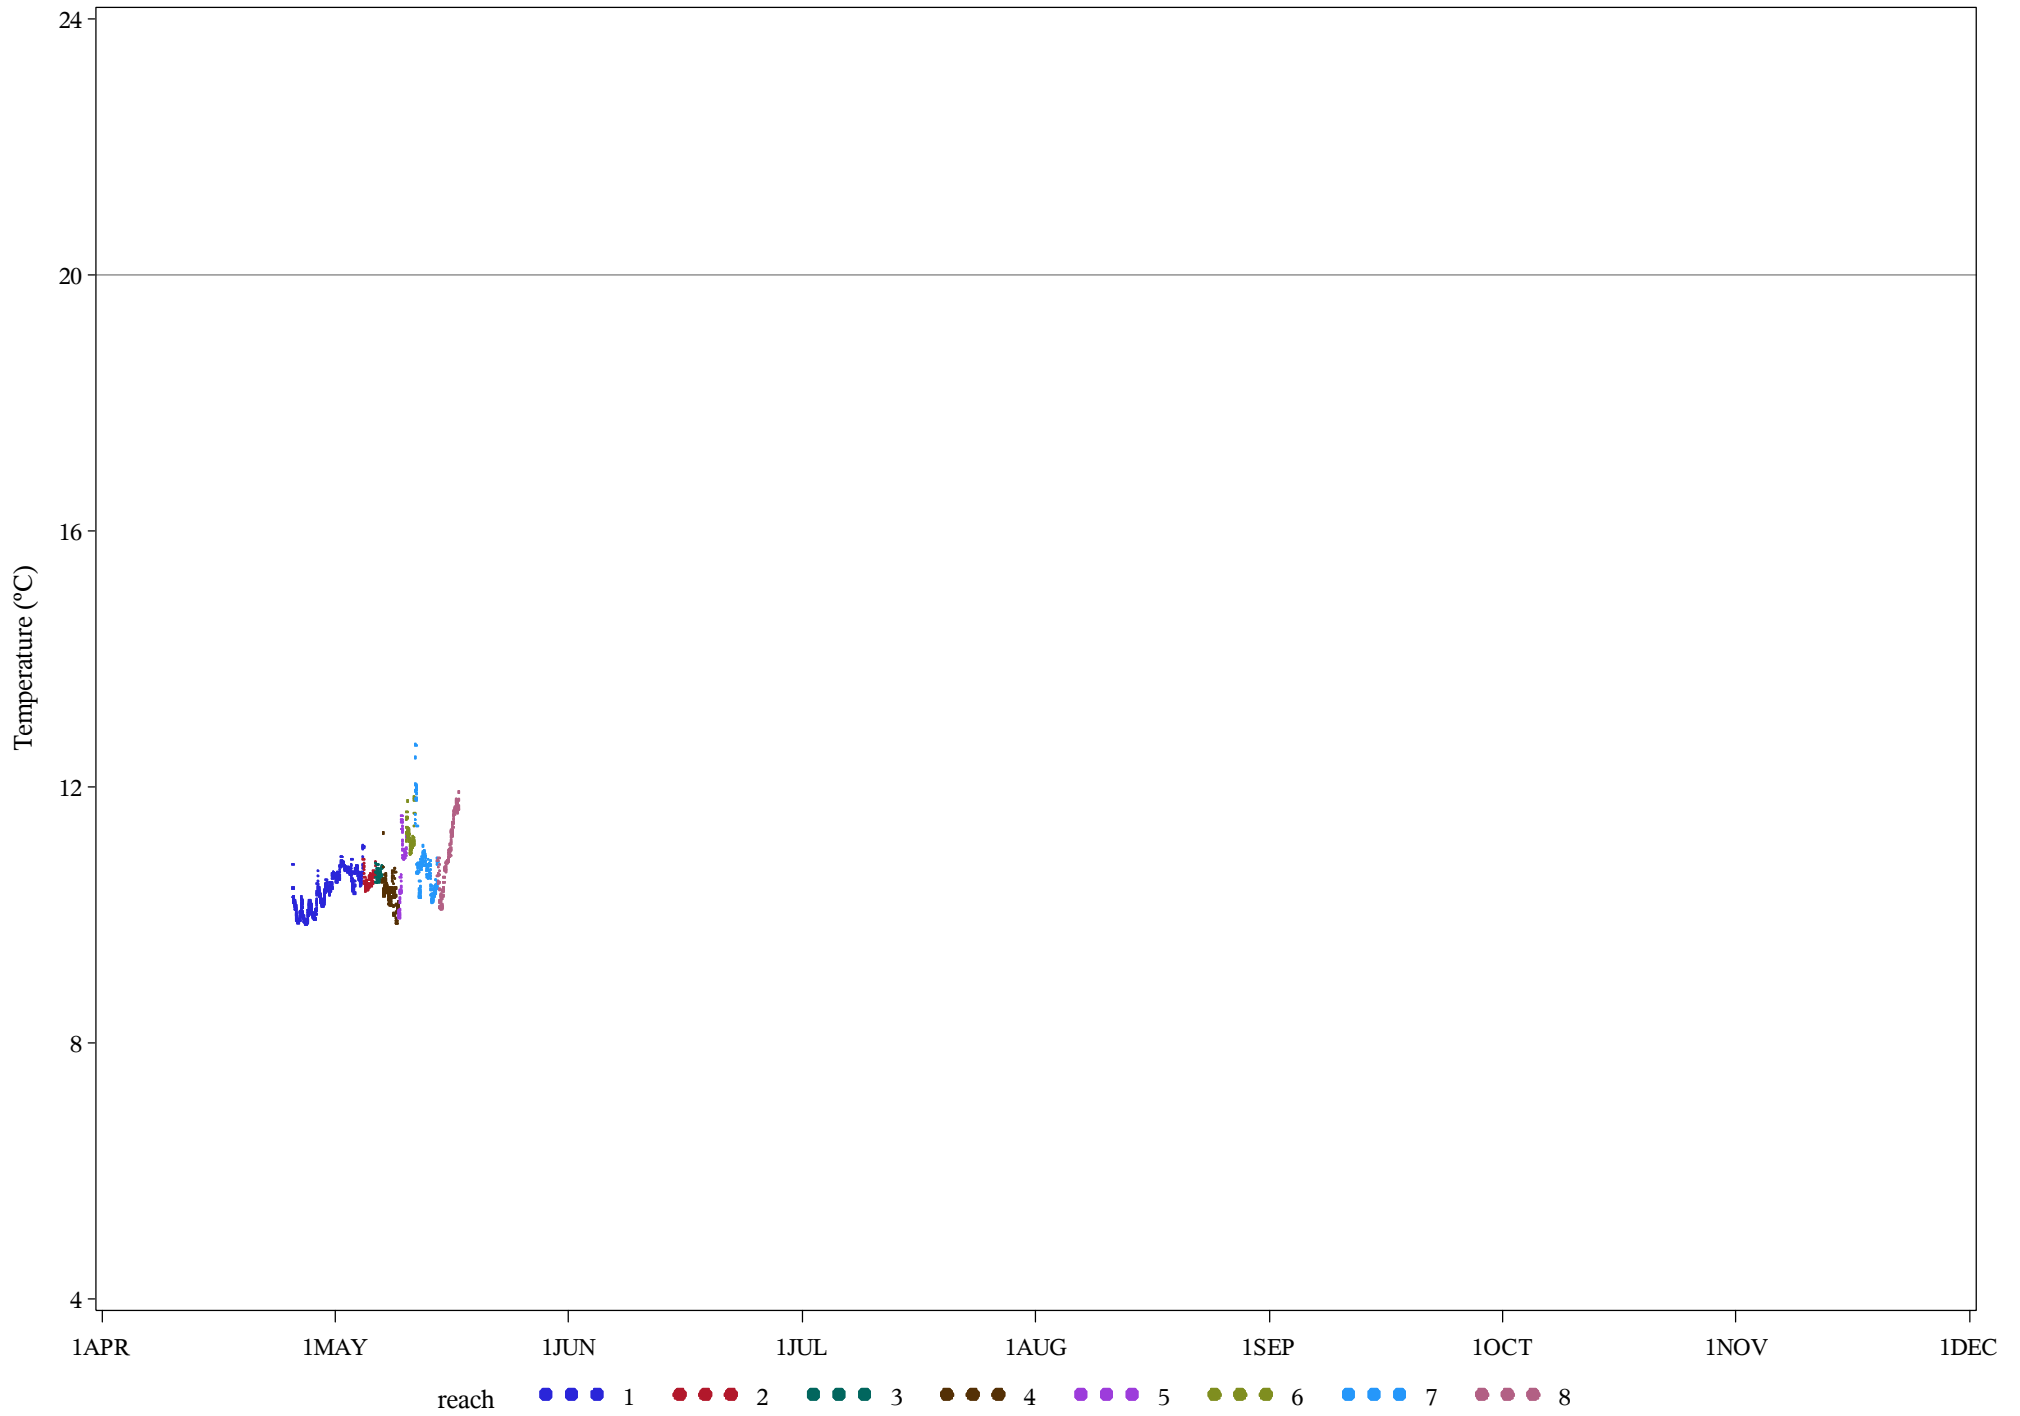

# Spring Chinook 3828A

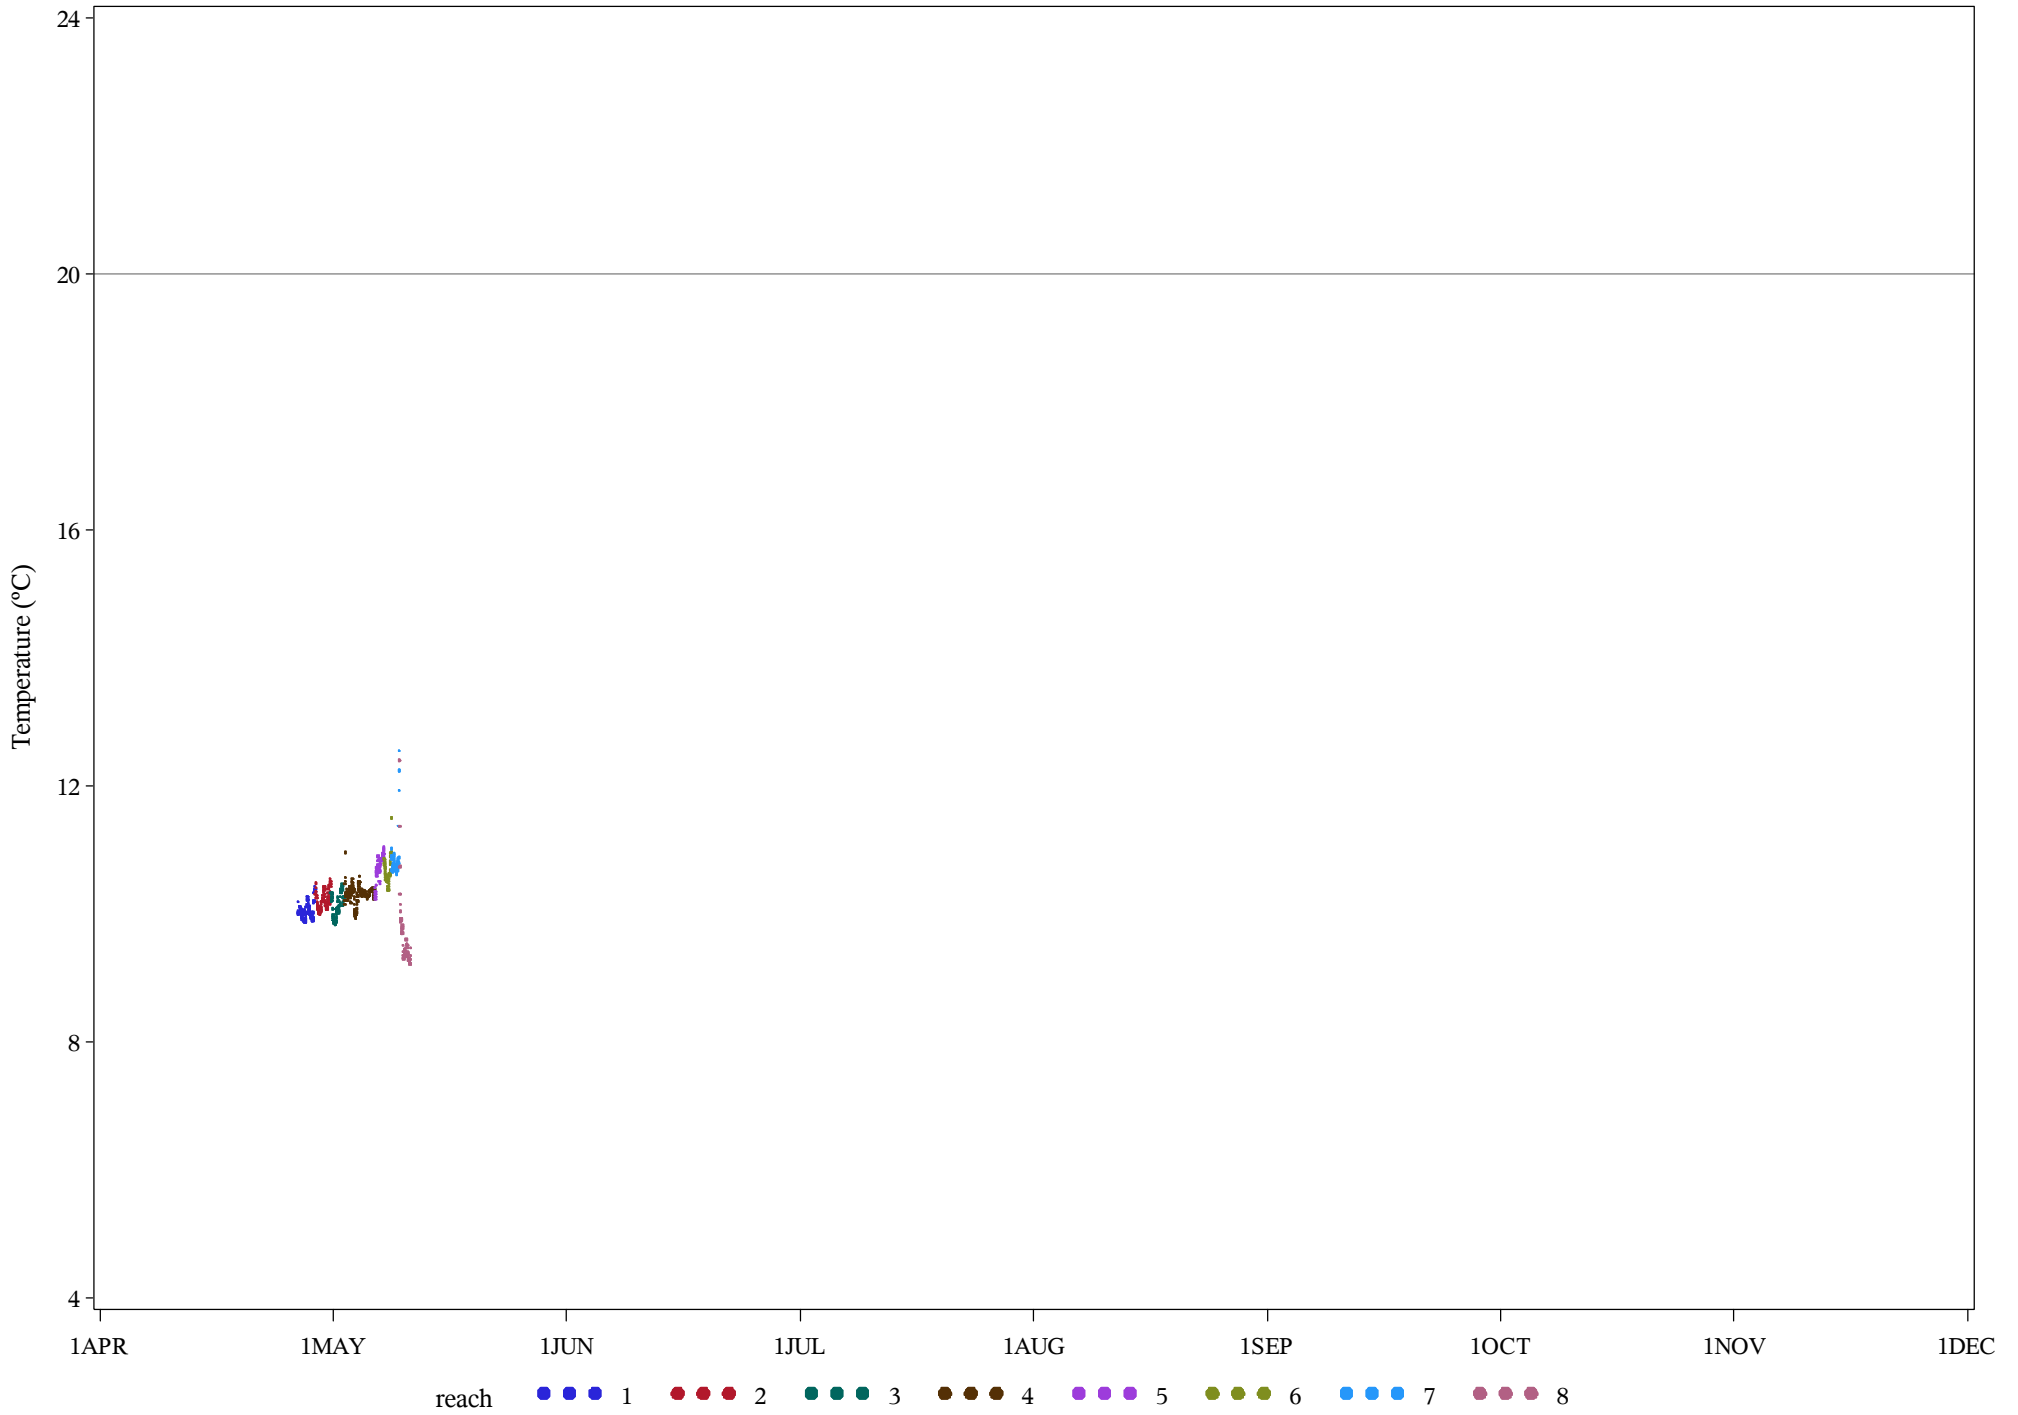





# Spring Chinook 3836A

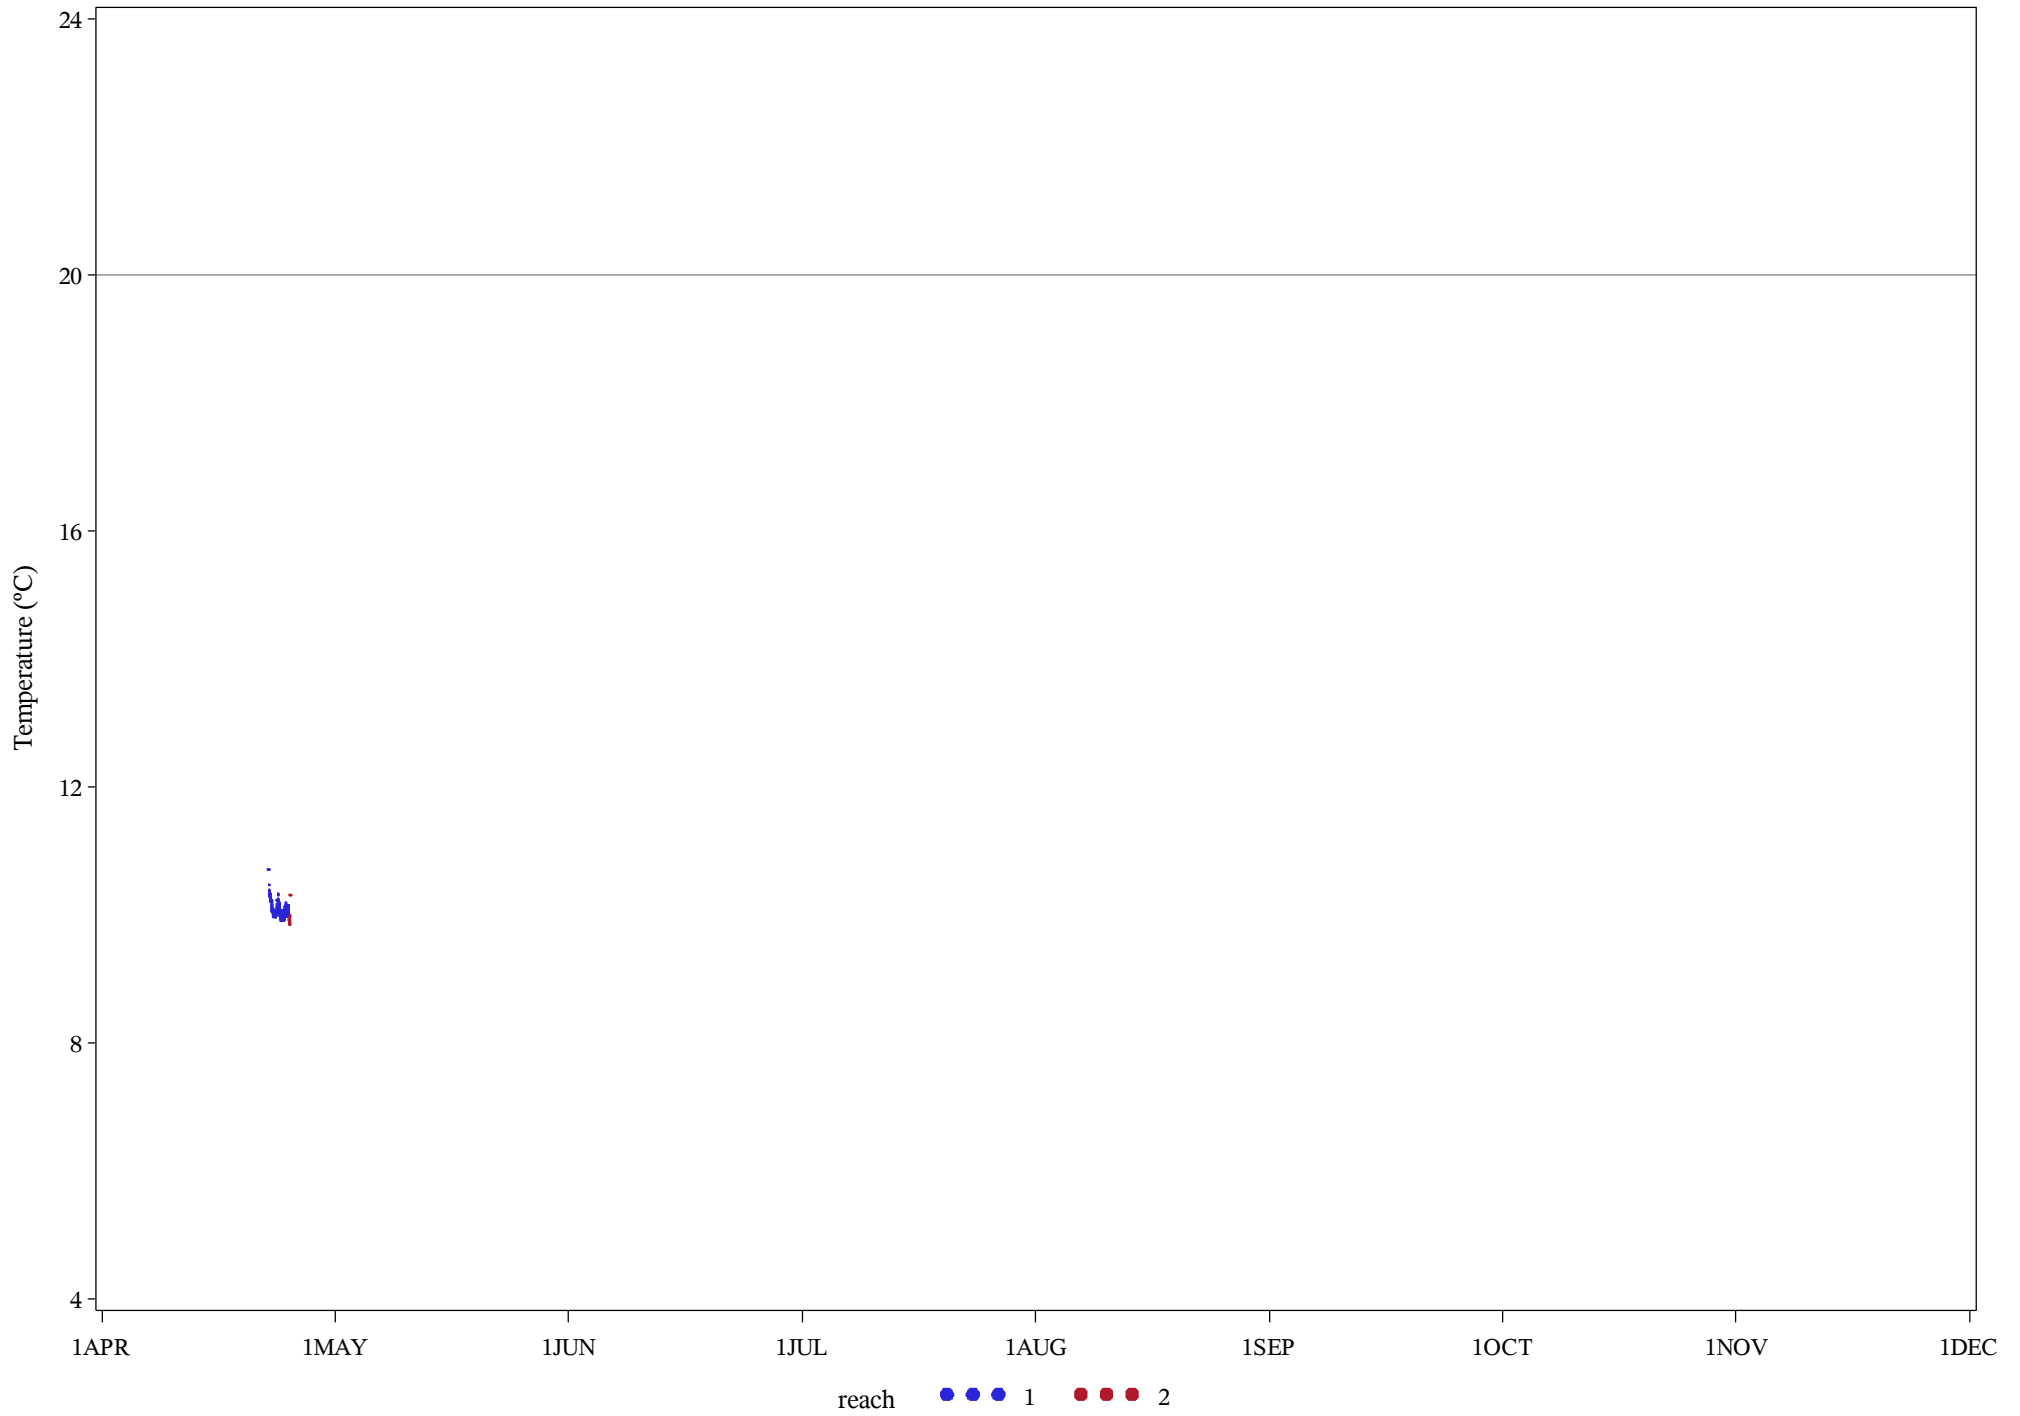

# Spring Chinook 3845A

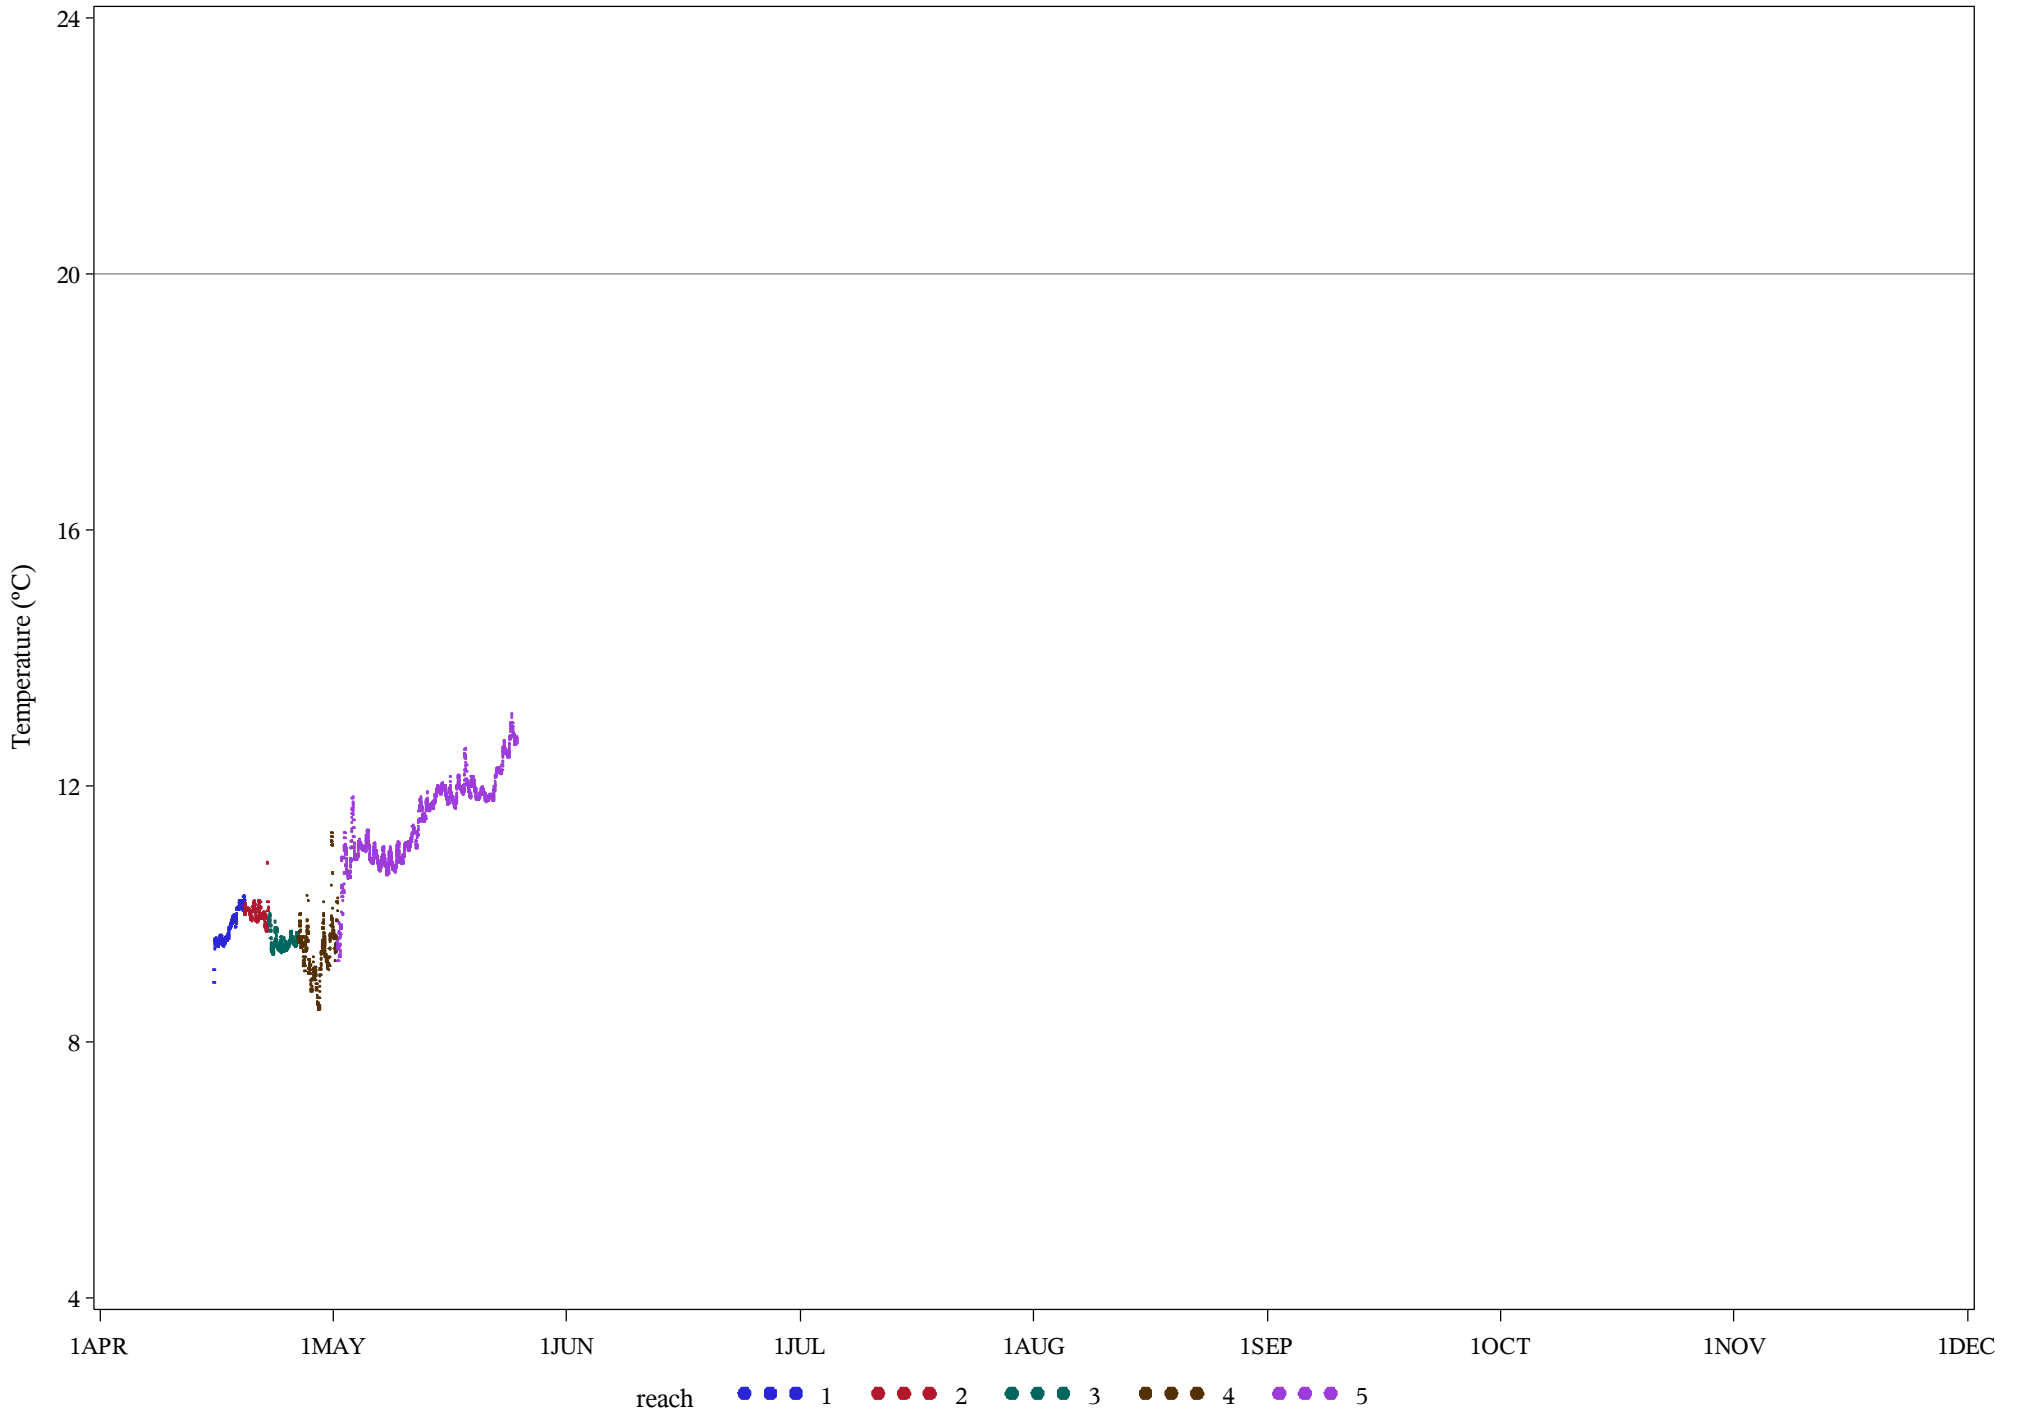

# Spring Chinook 3860A

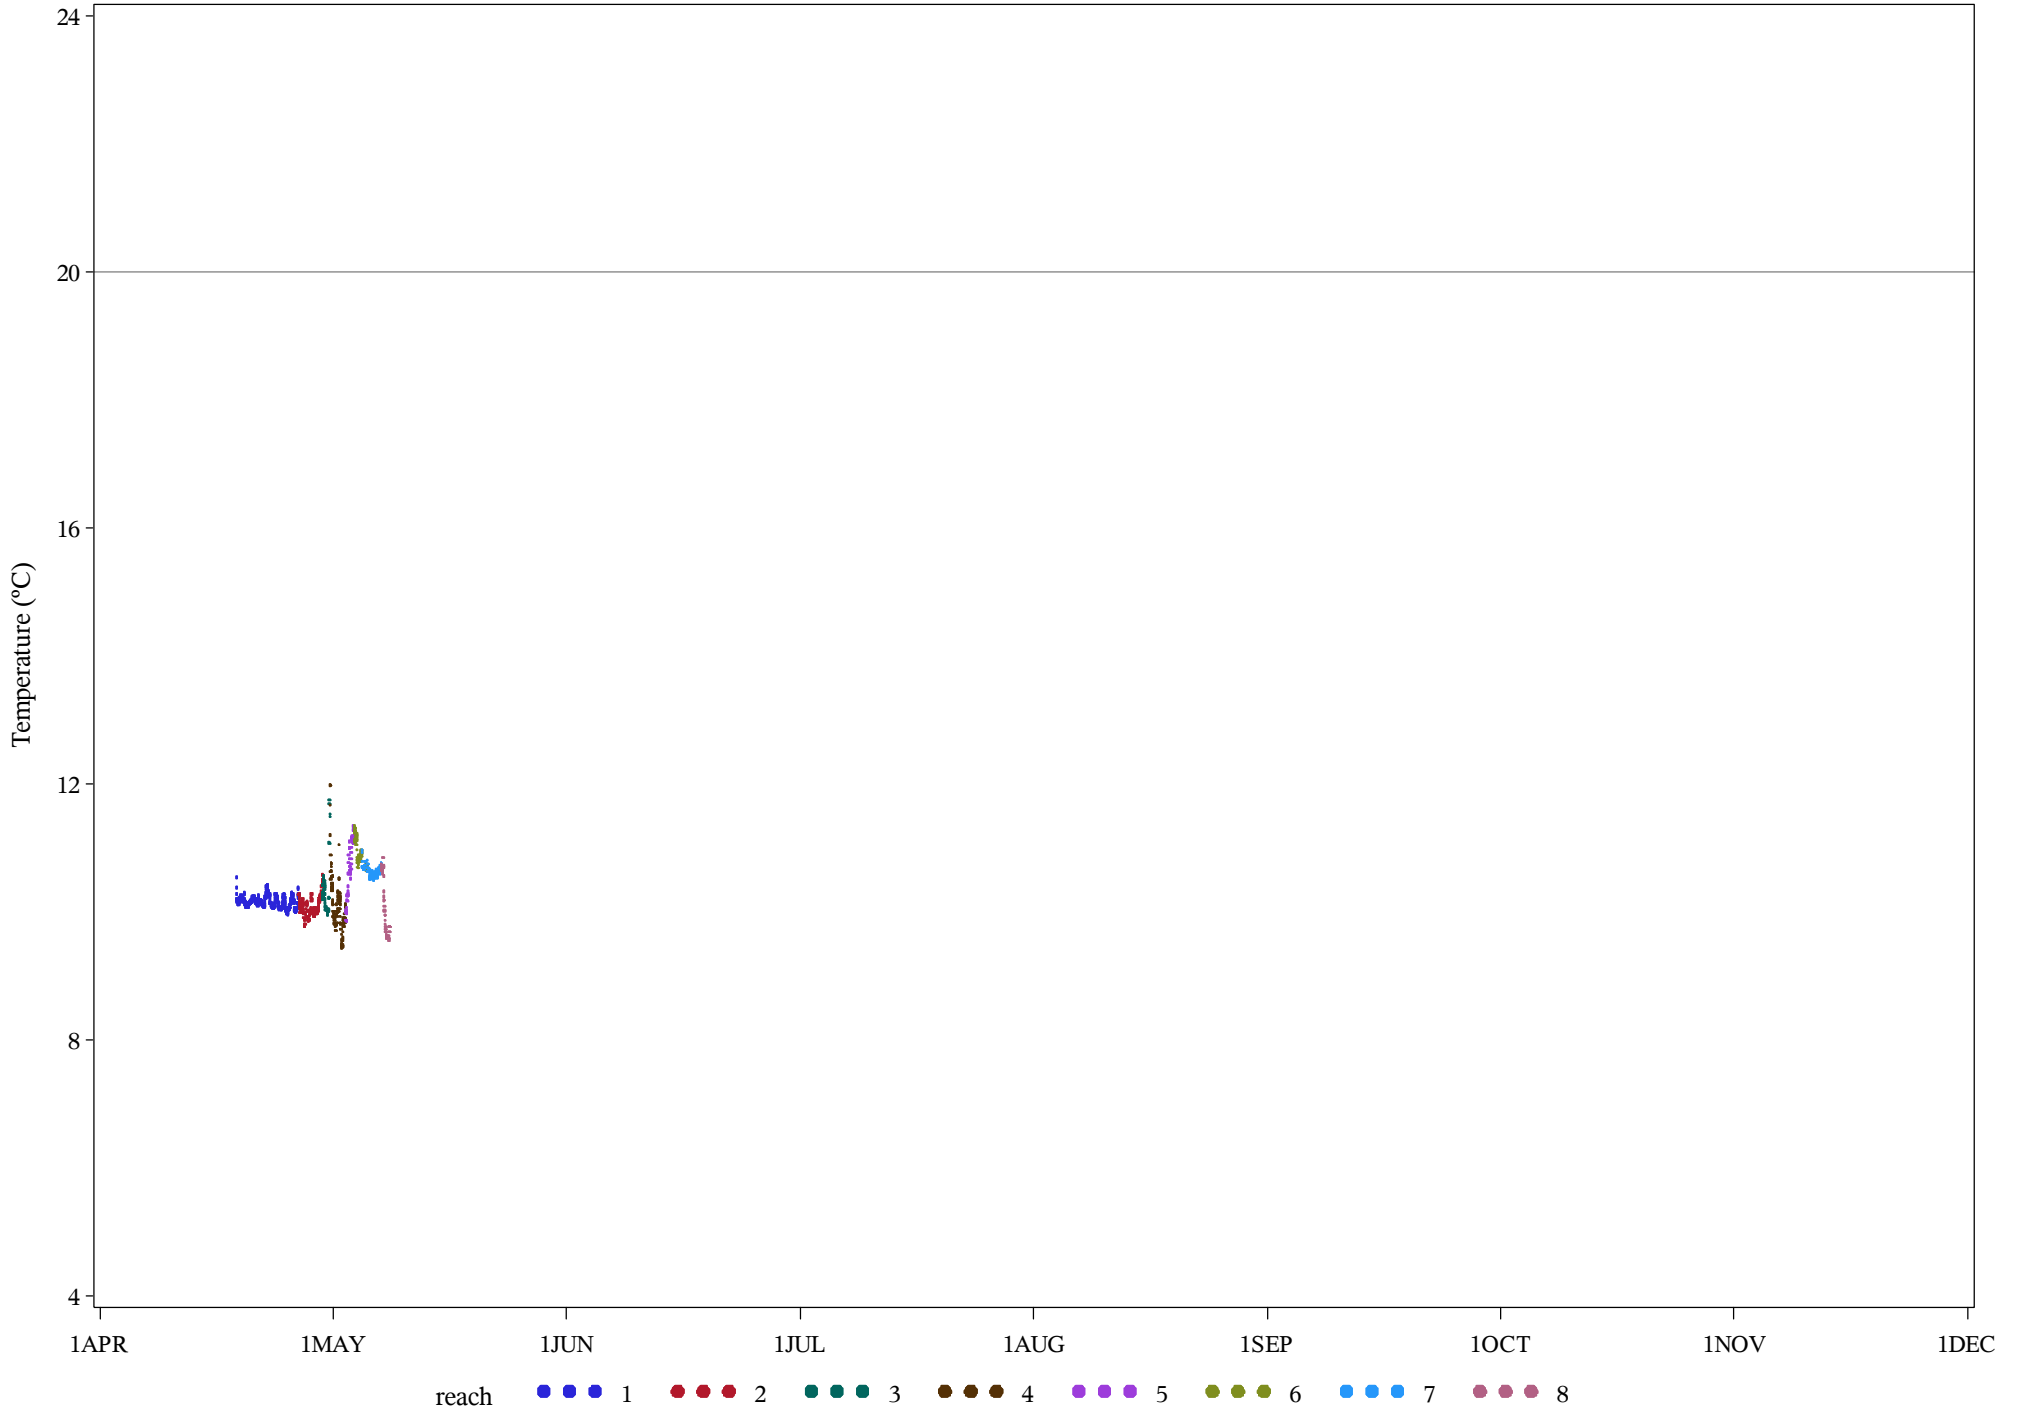



# Spring Chinook 4734A

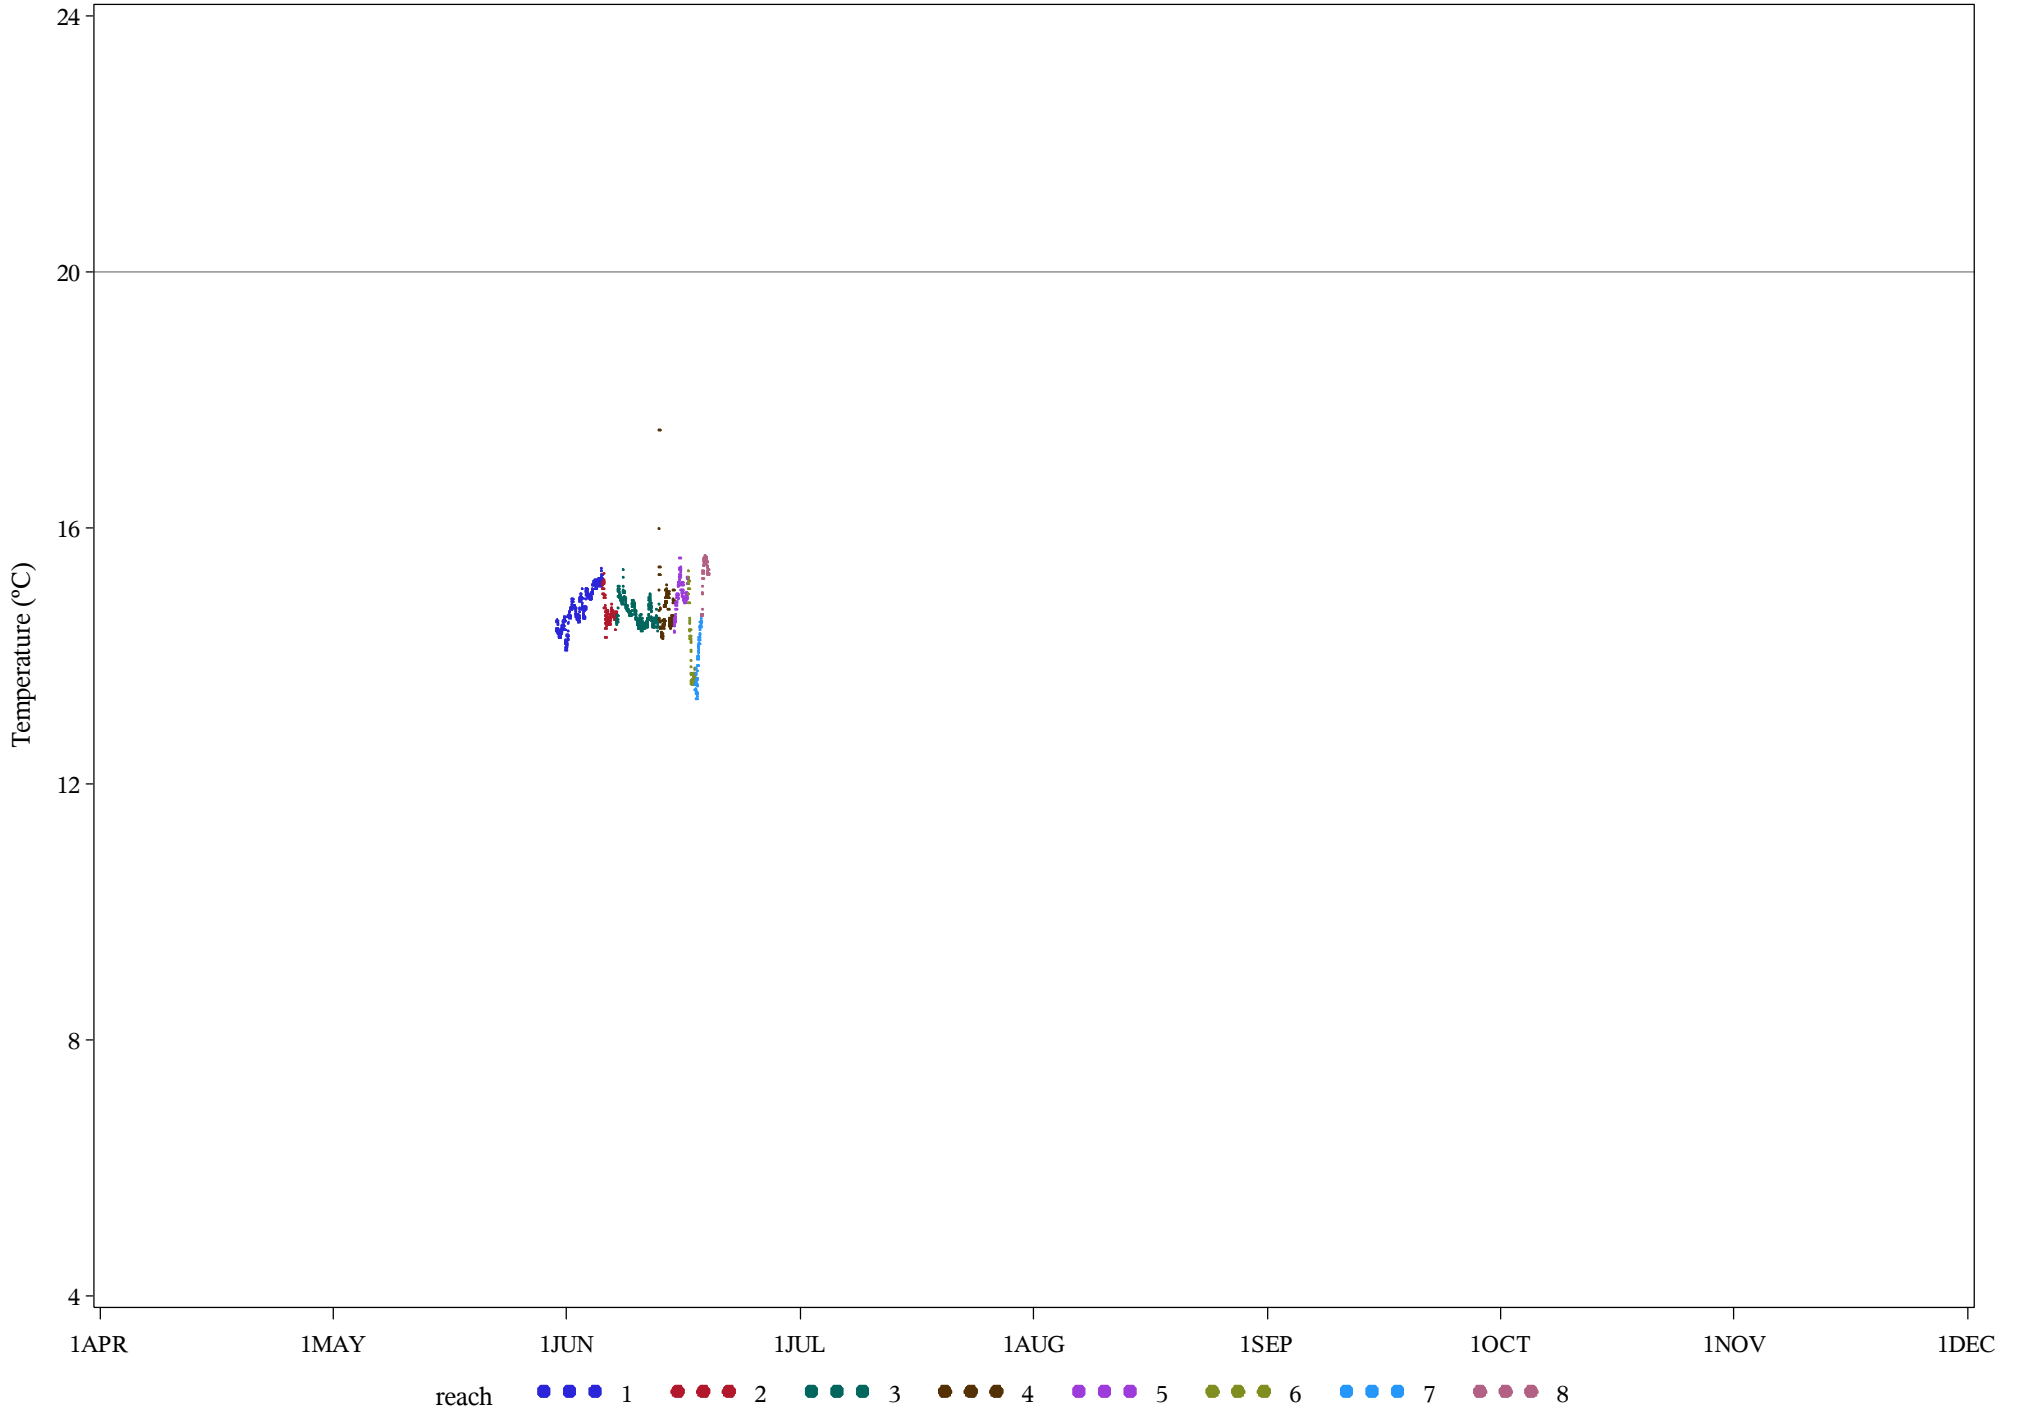

# Spring Chinook 4870A

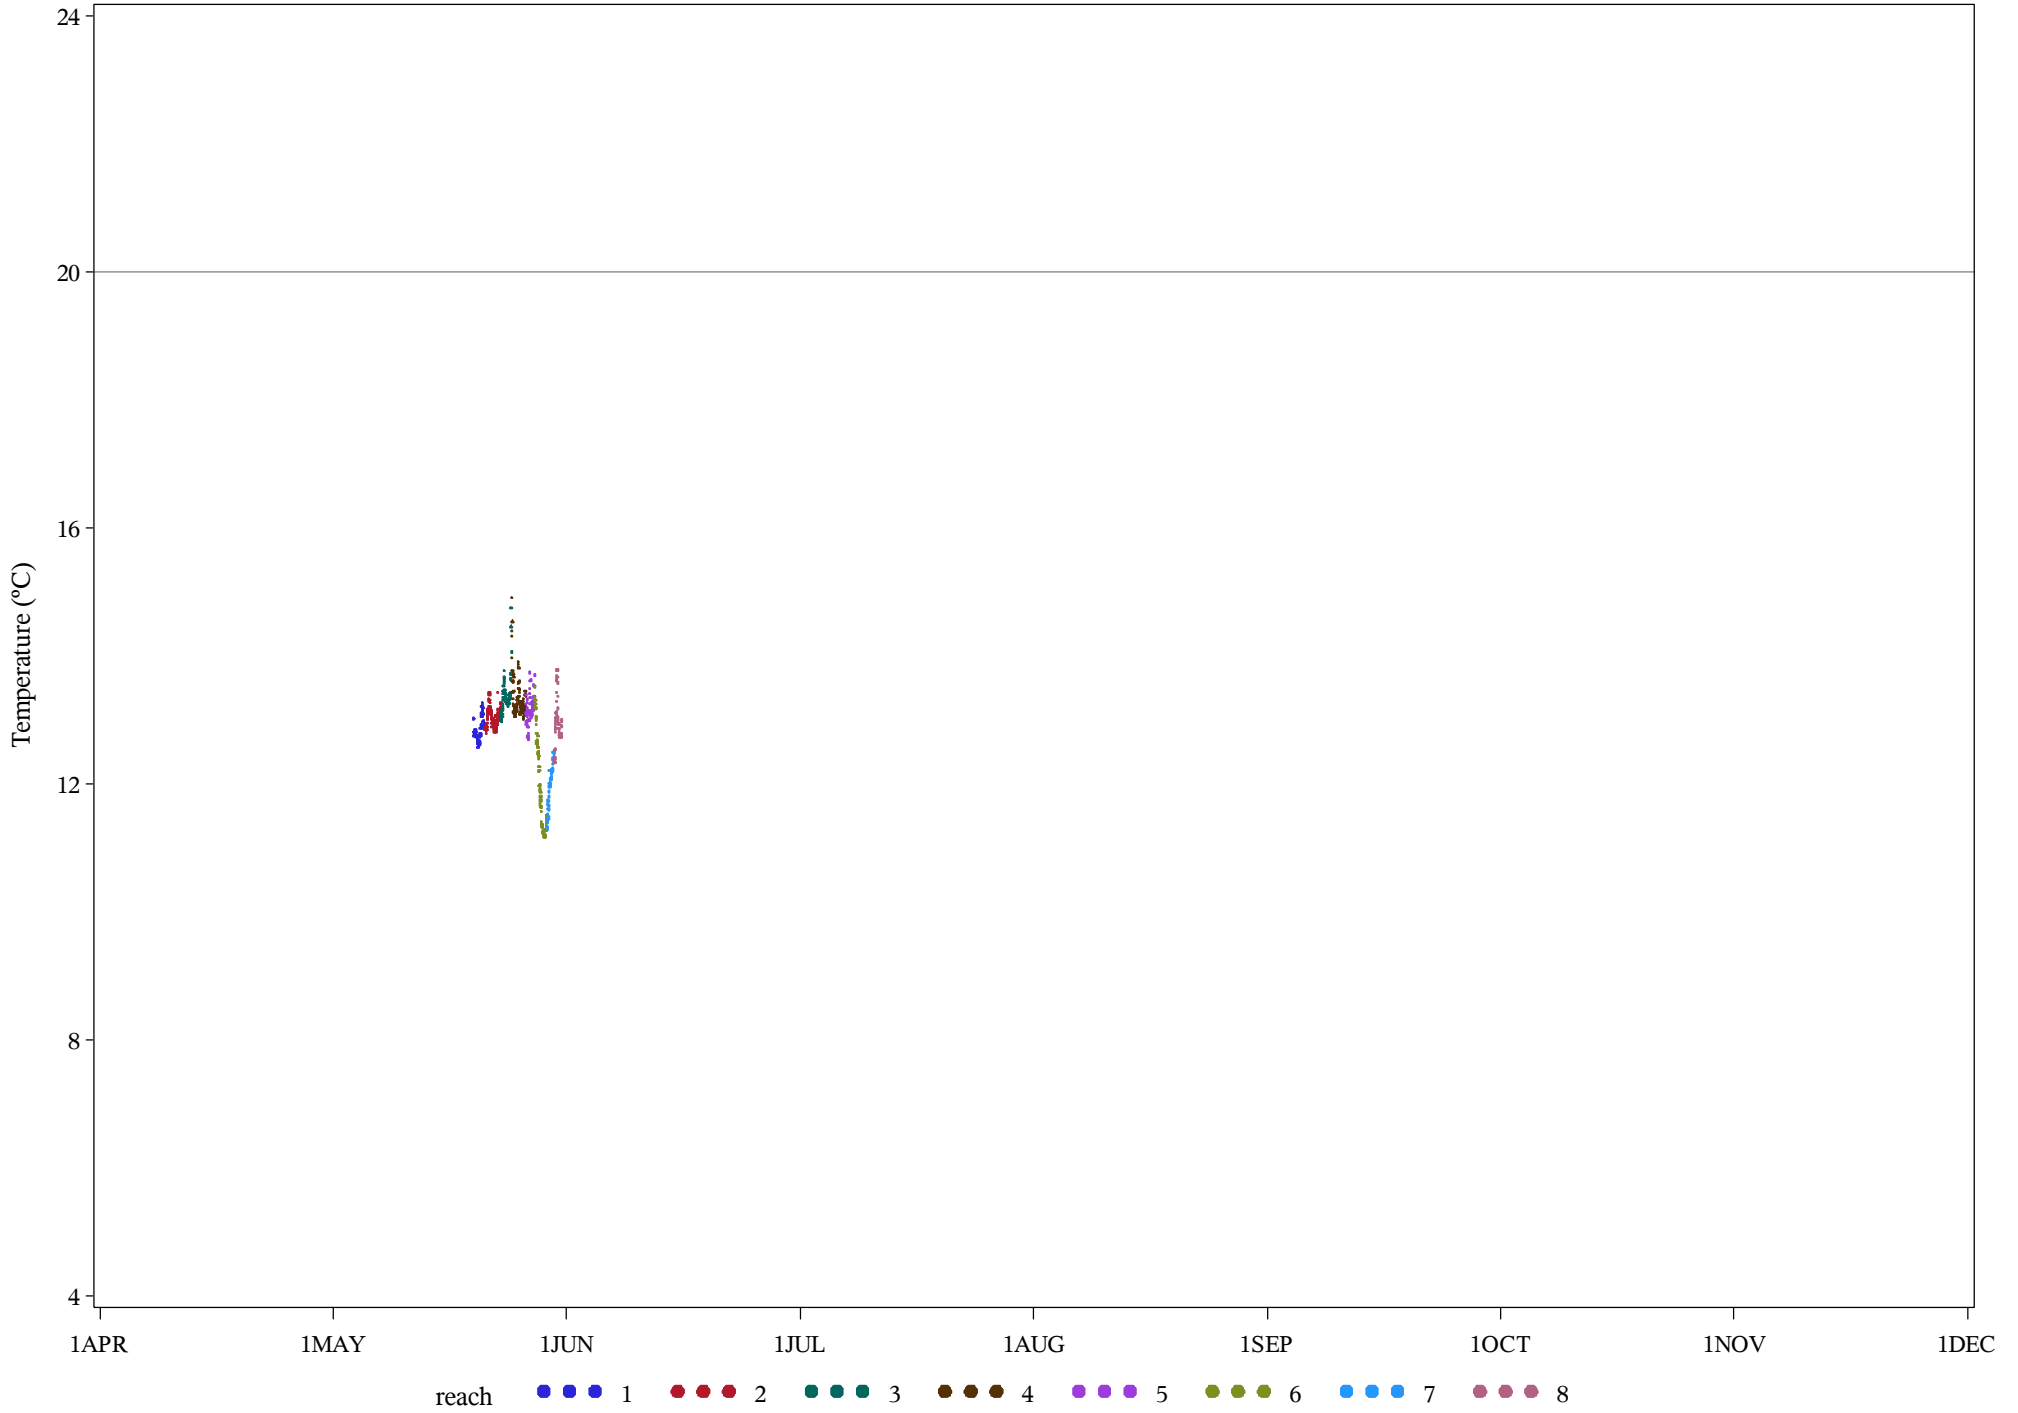

# Spring Chinook 4877A

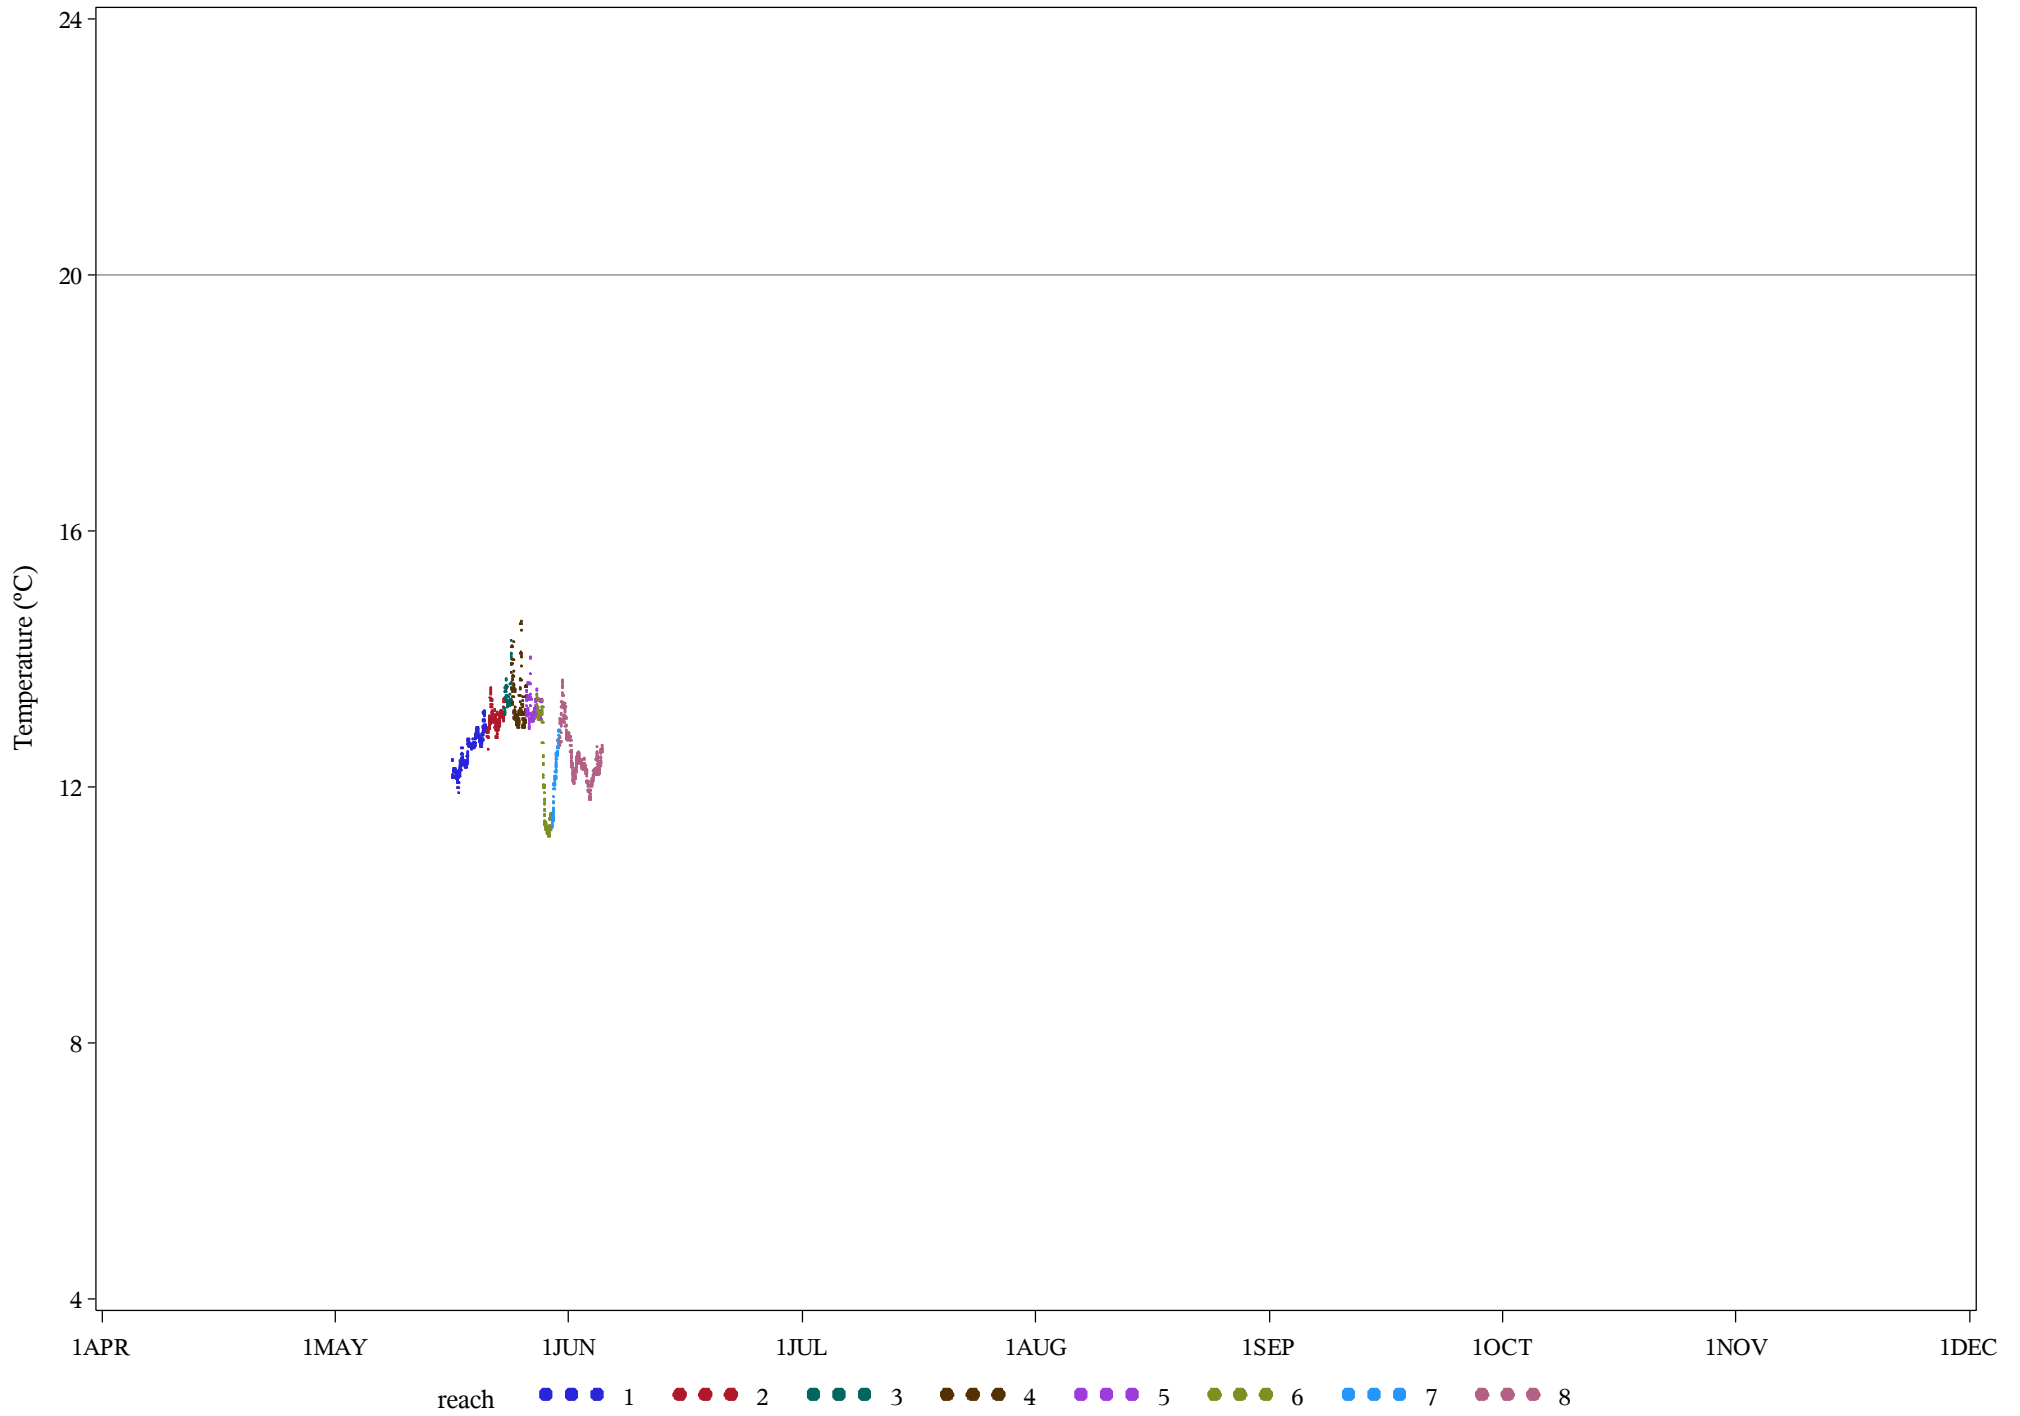

# Spring Chinook 4879A

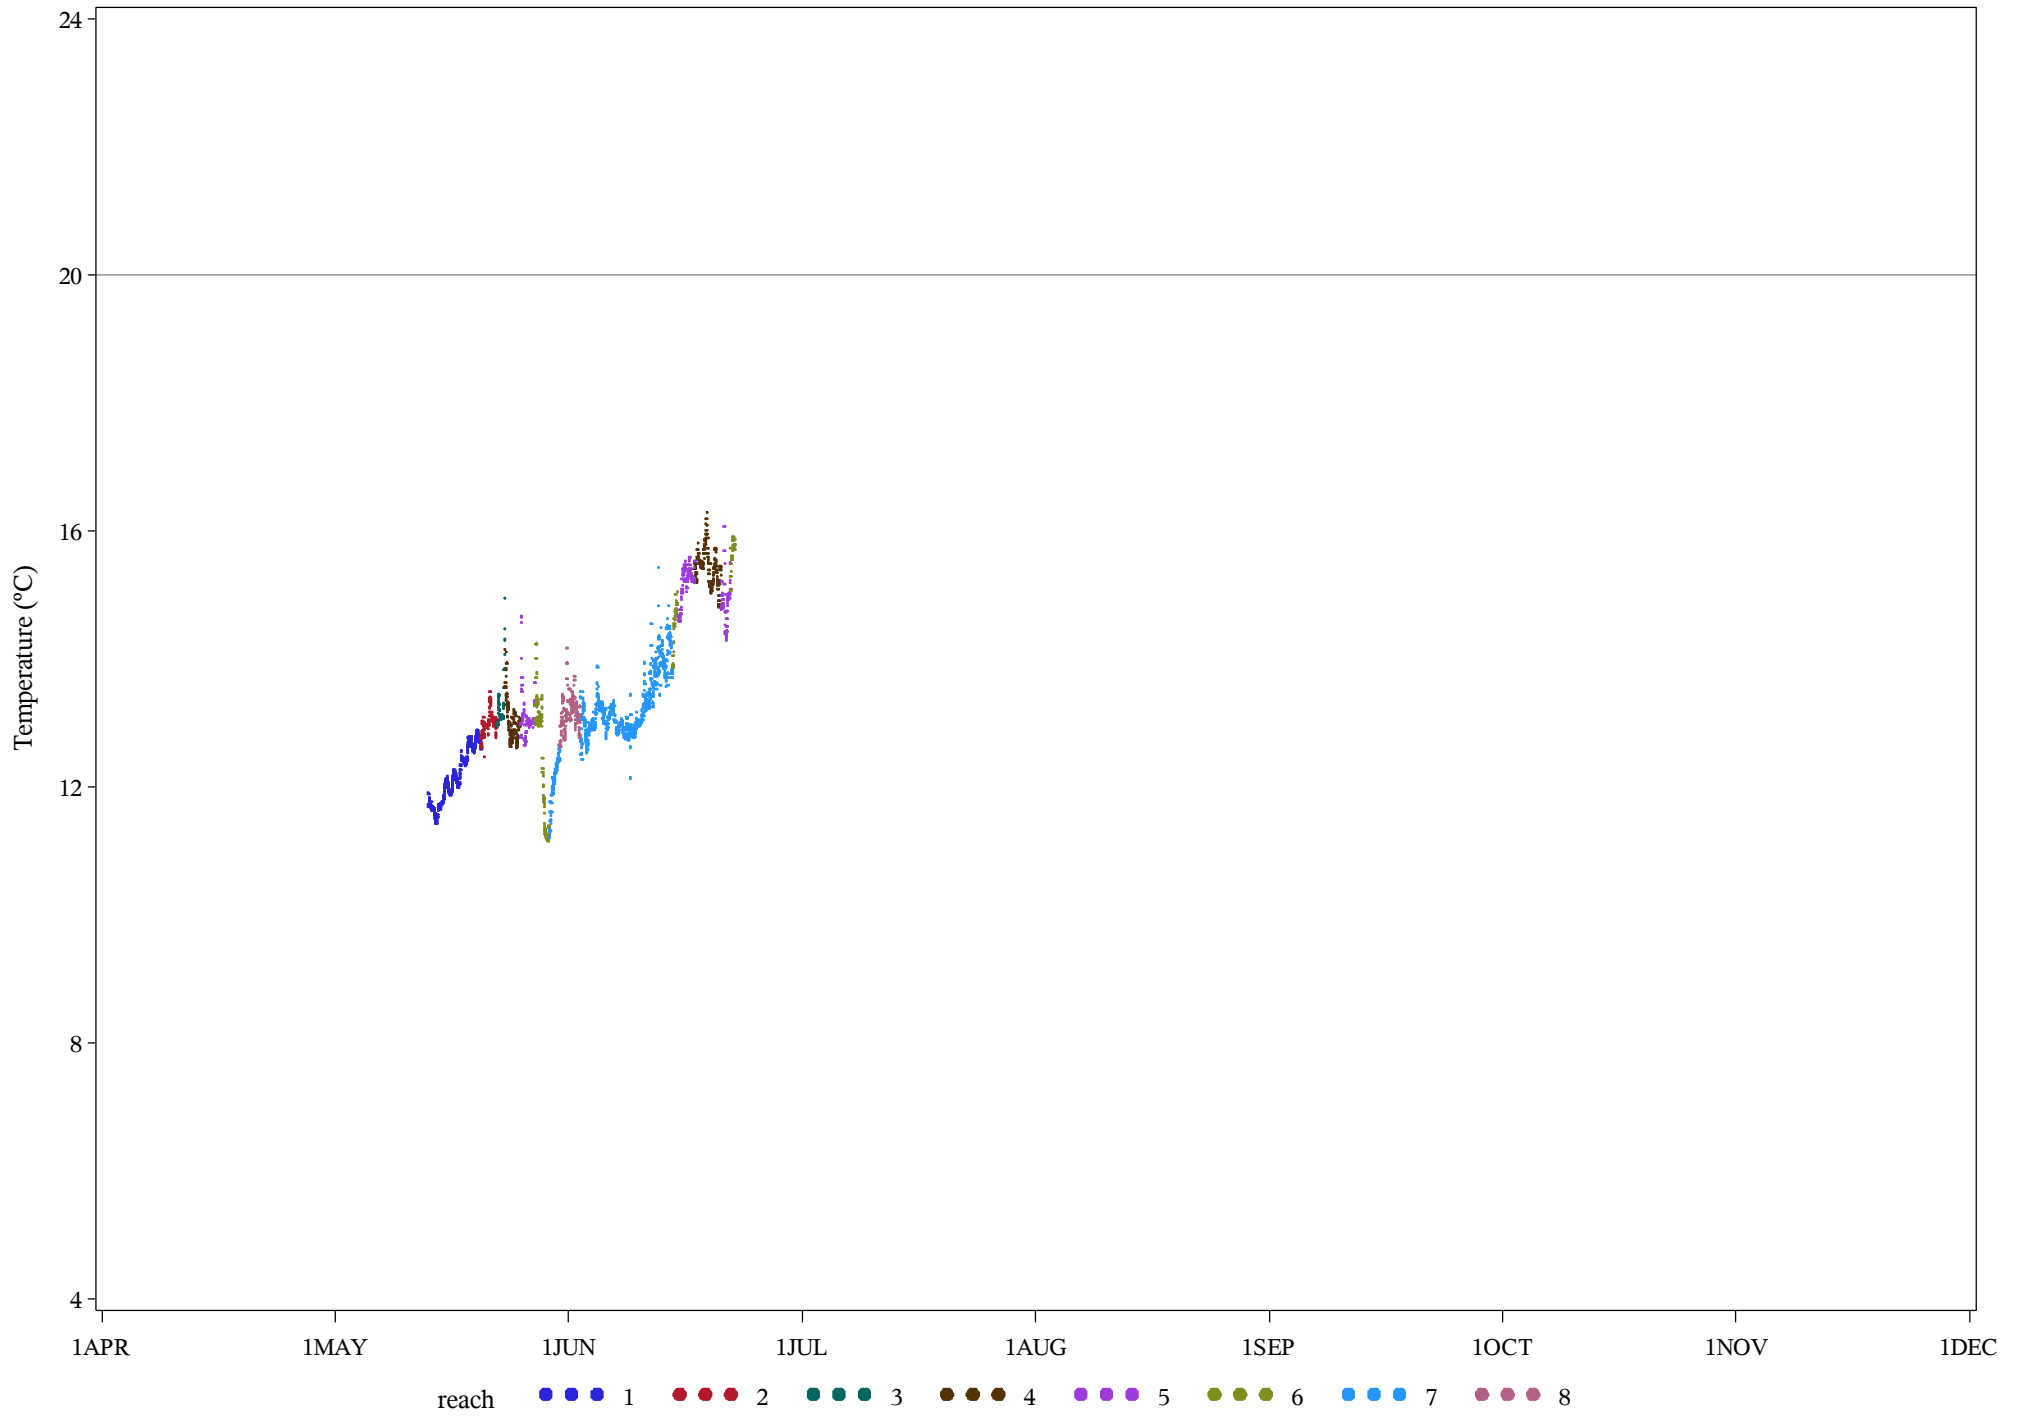





# Spring Chinook 4885A

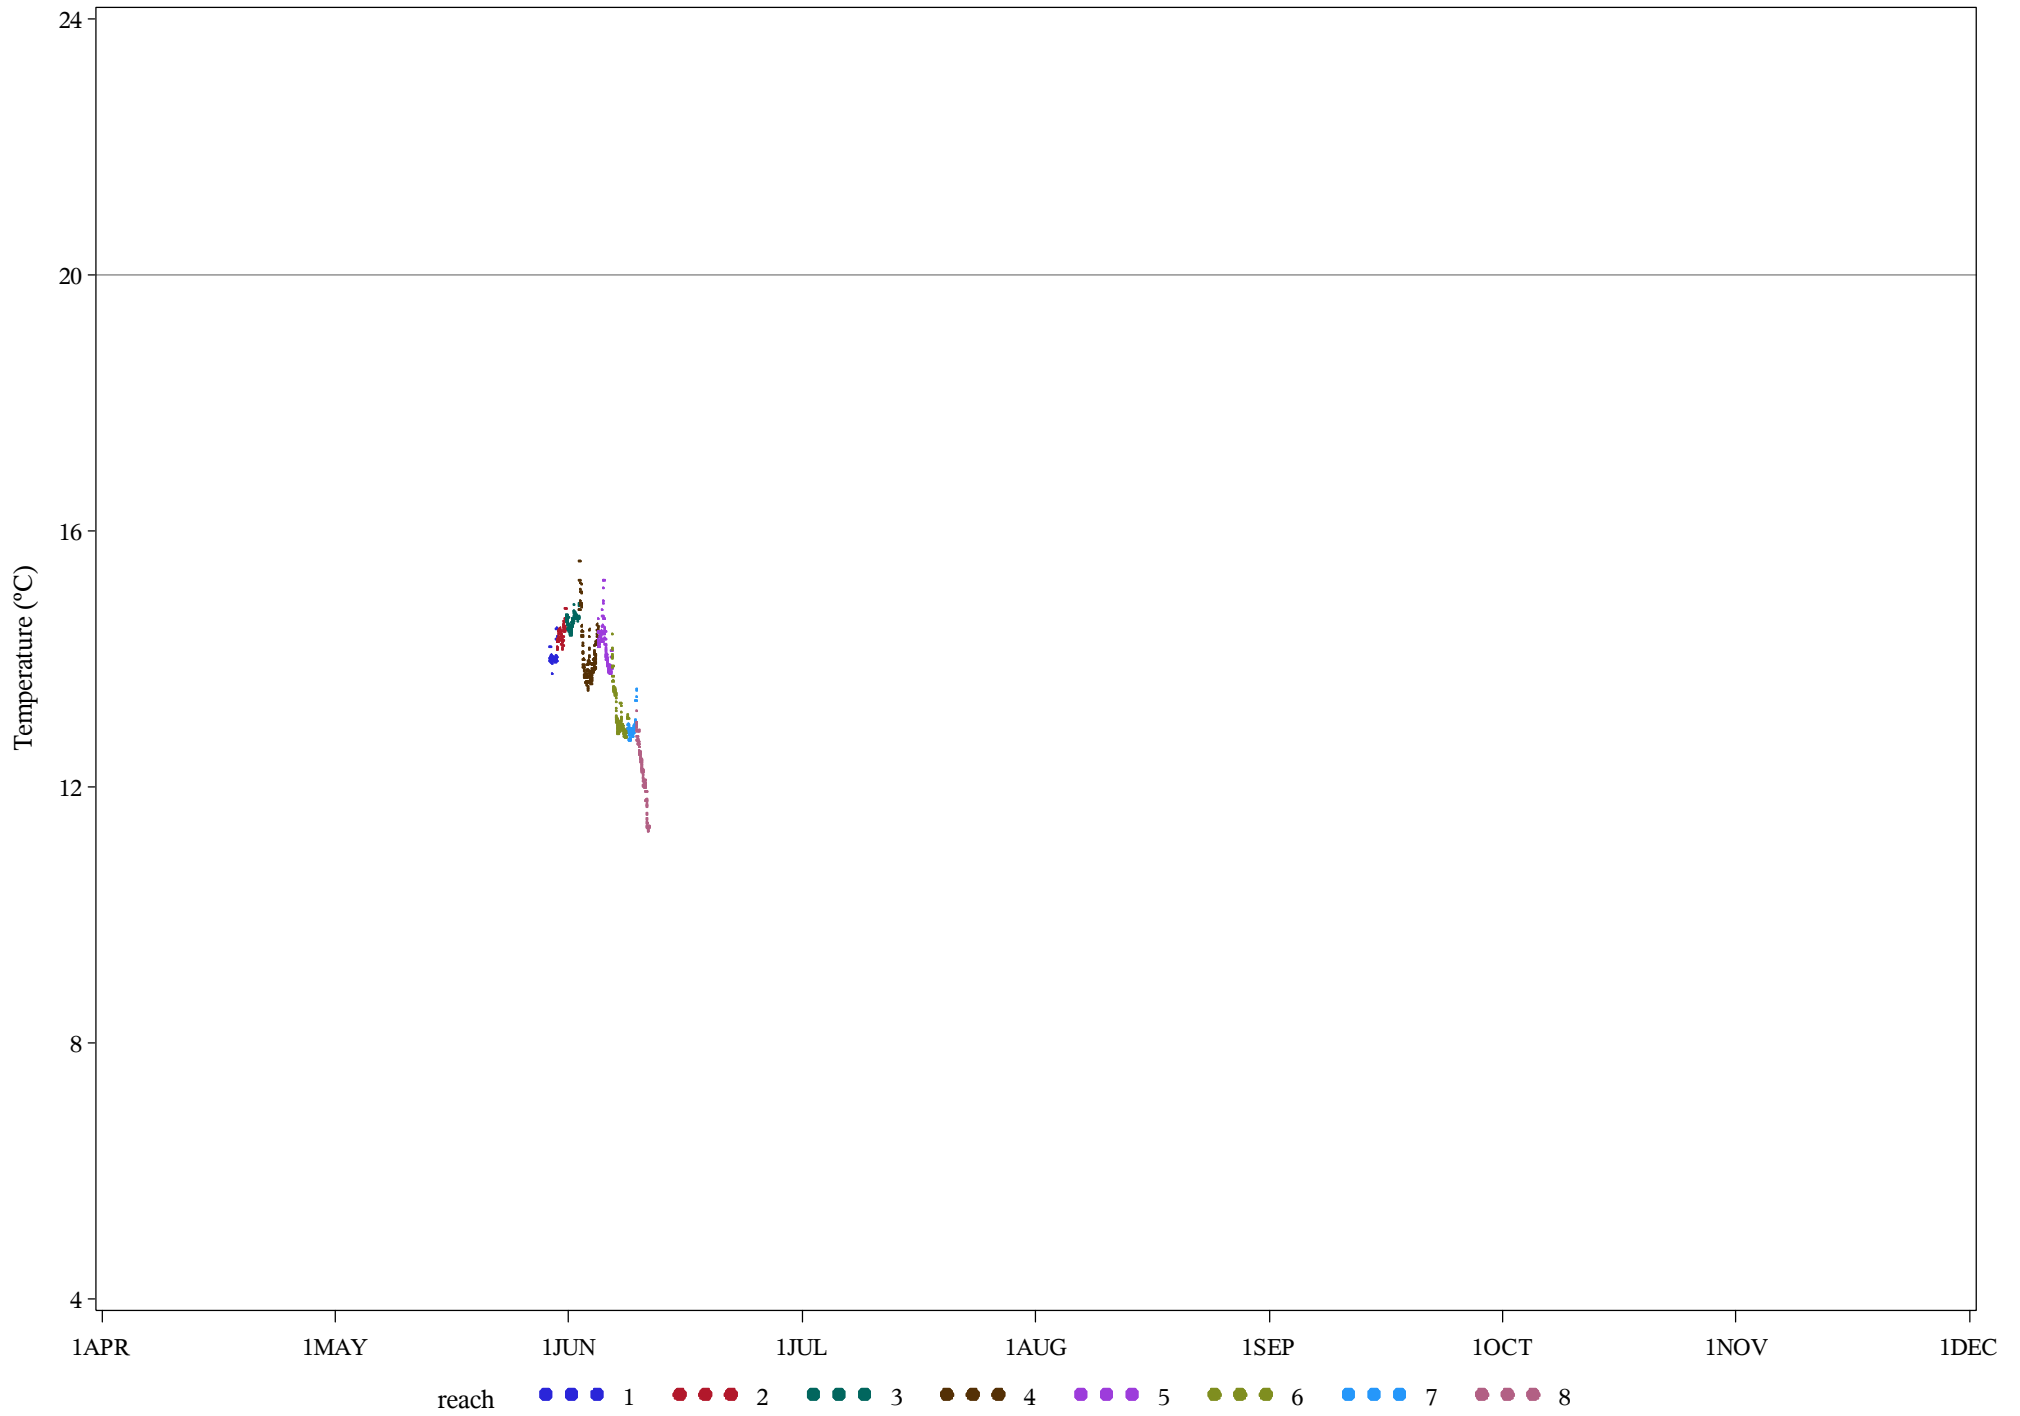

# Spring Chinook 4886A

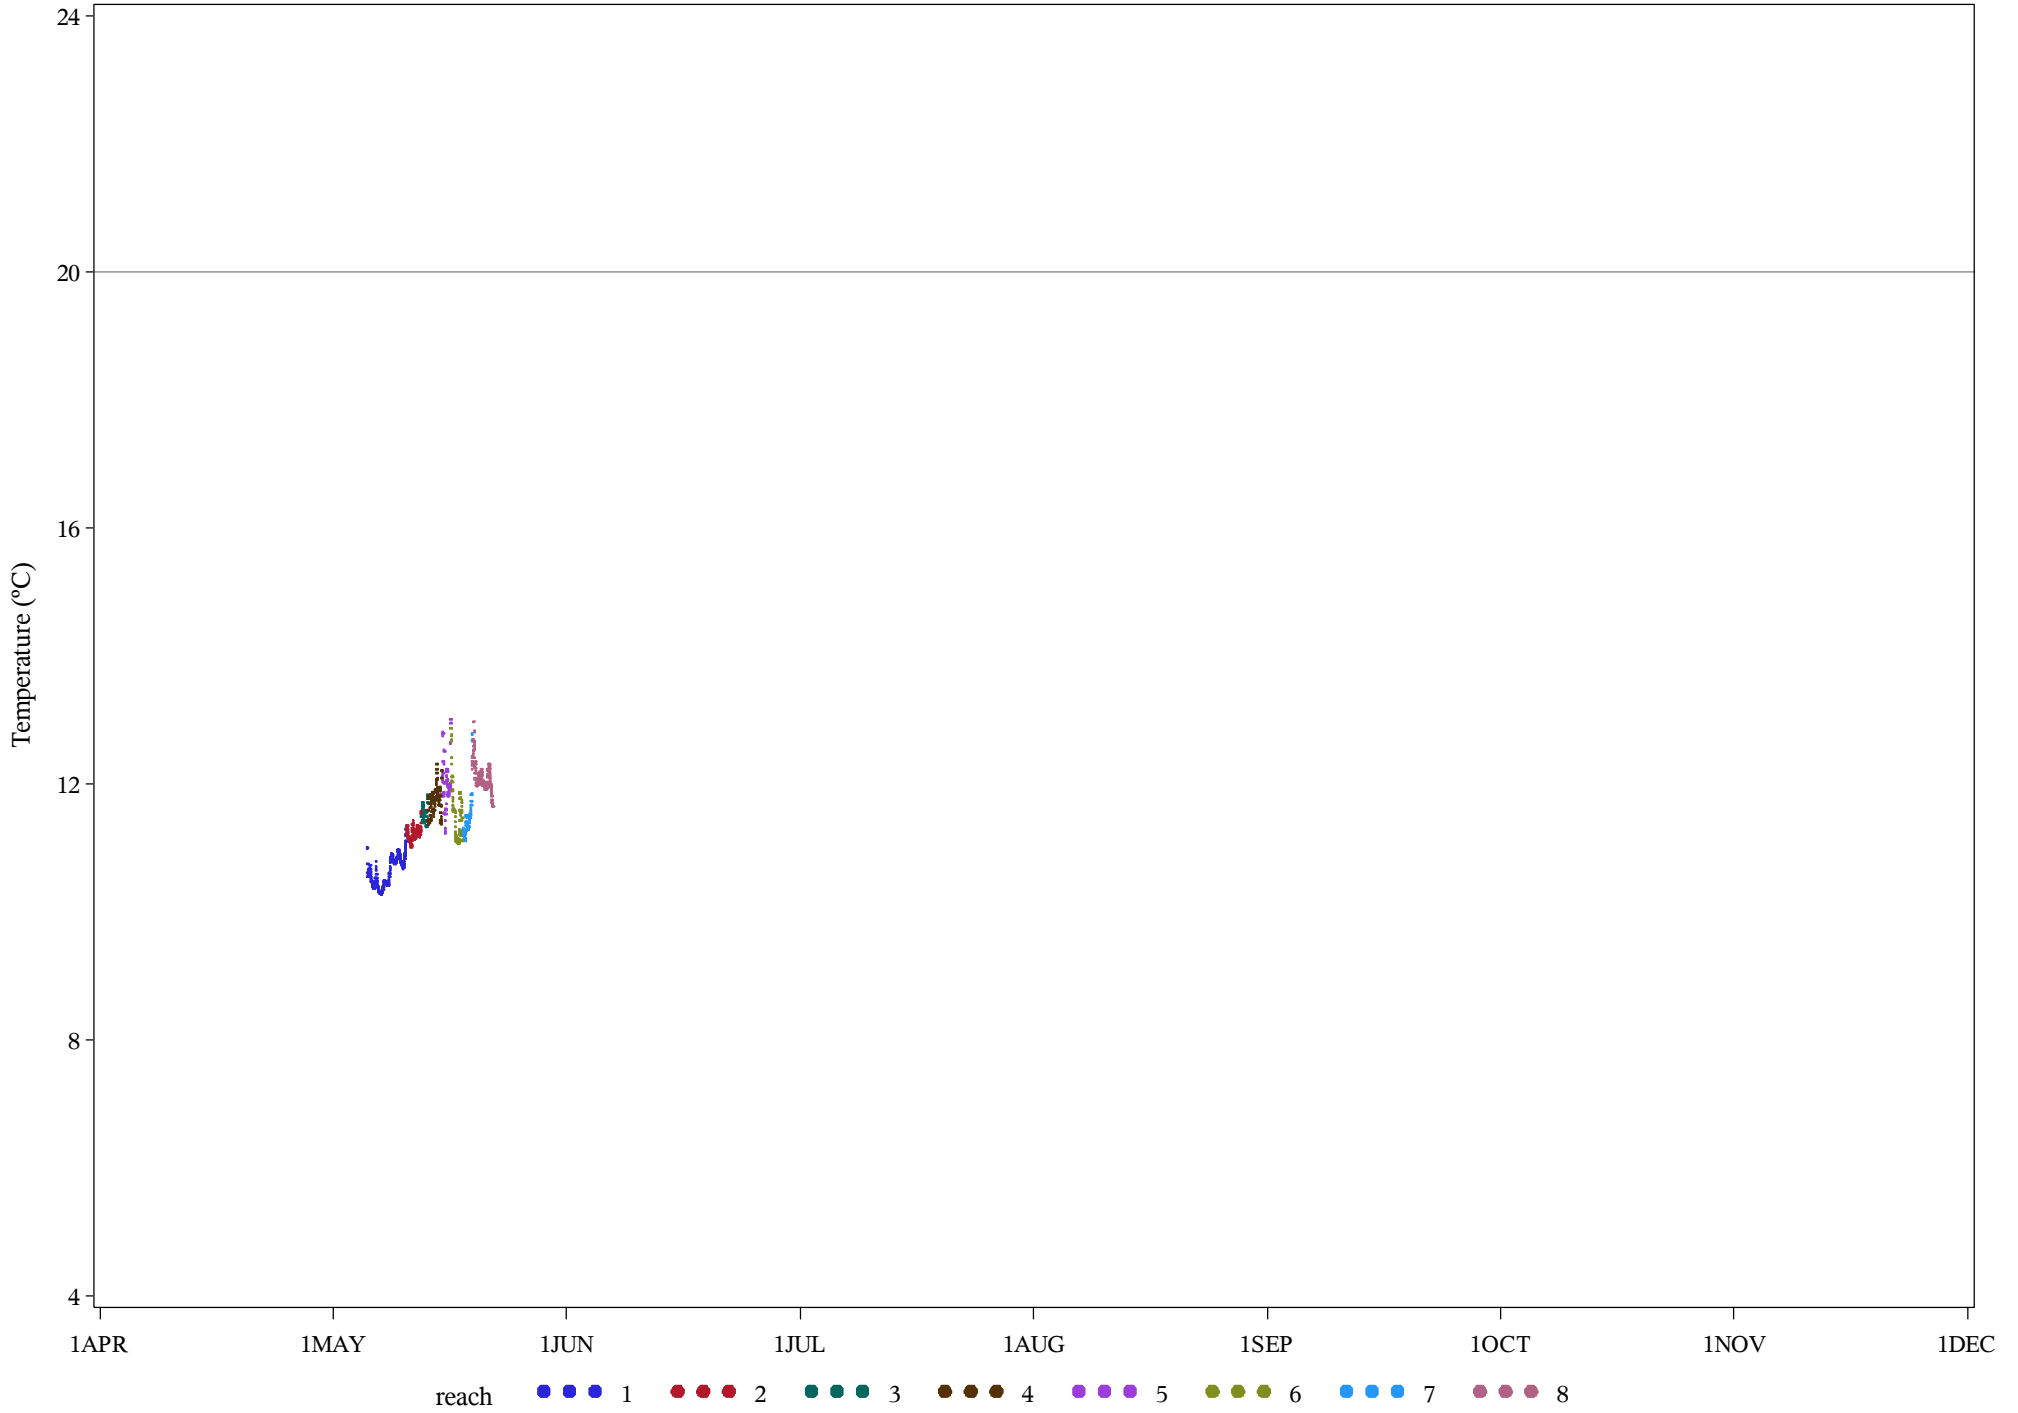



# Spring Chinook 4888A

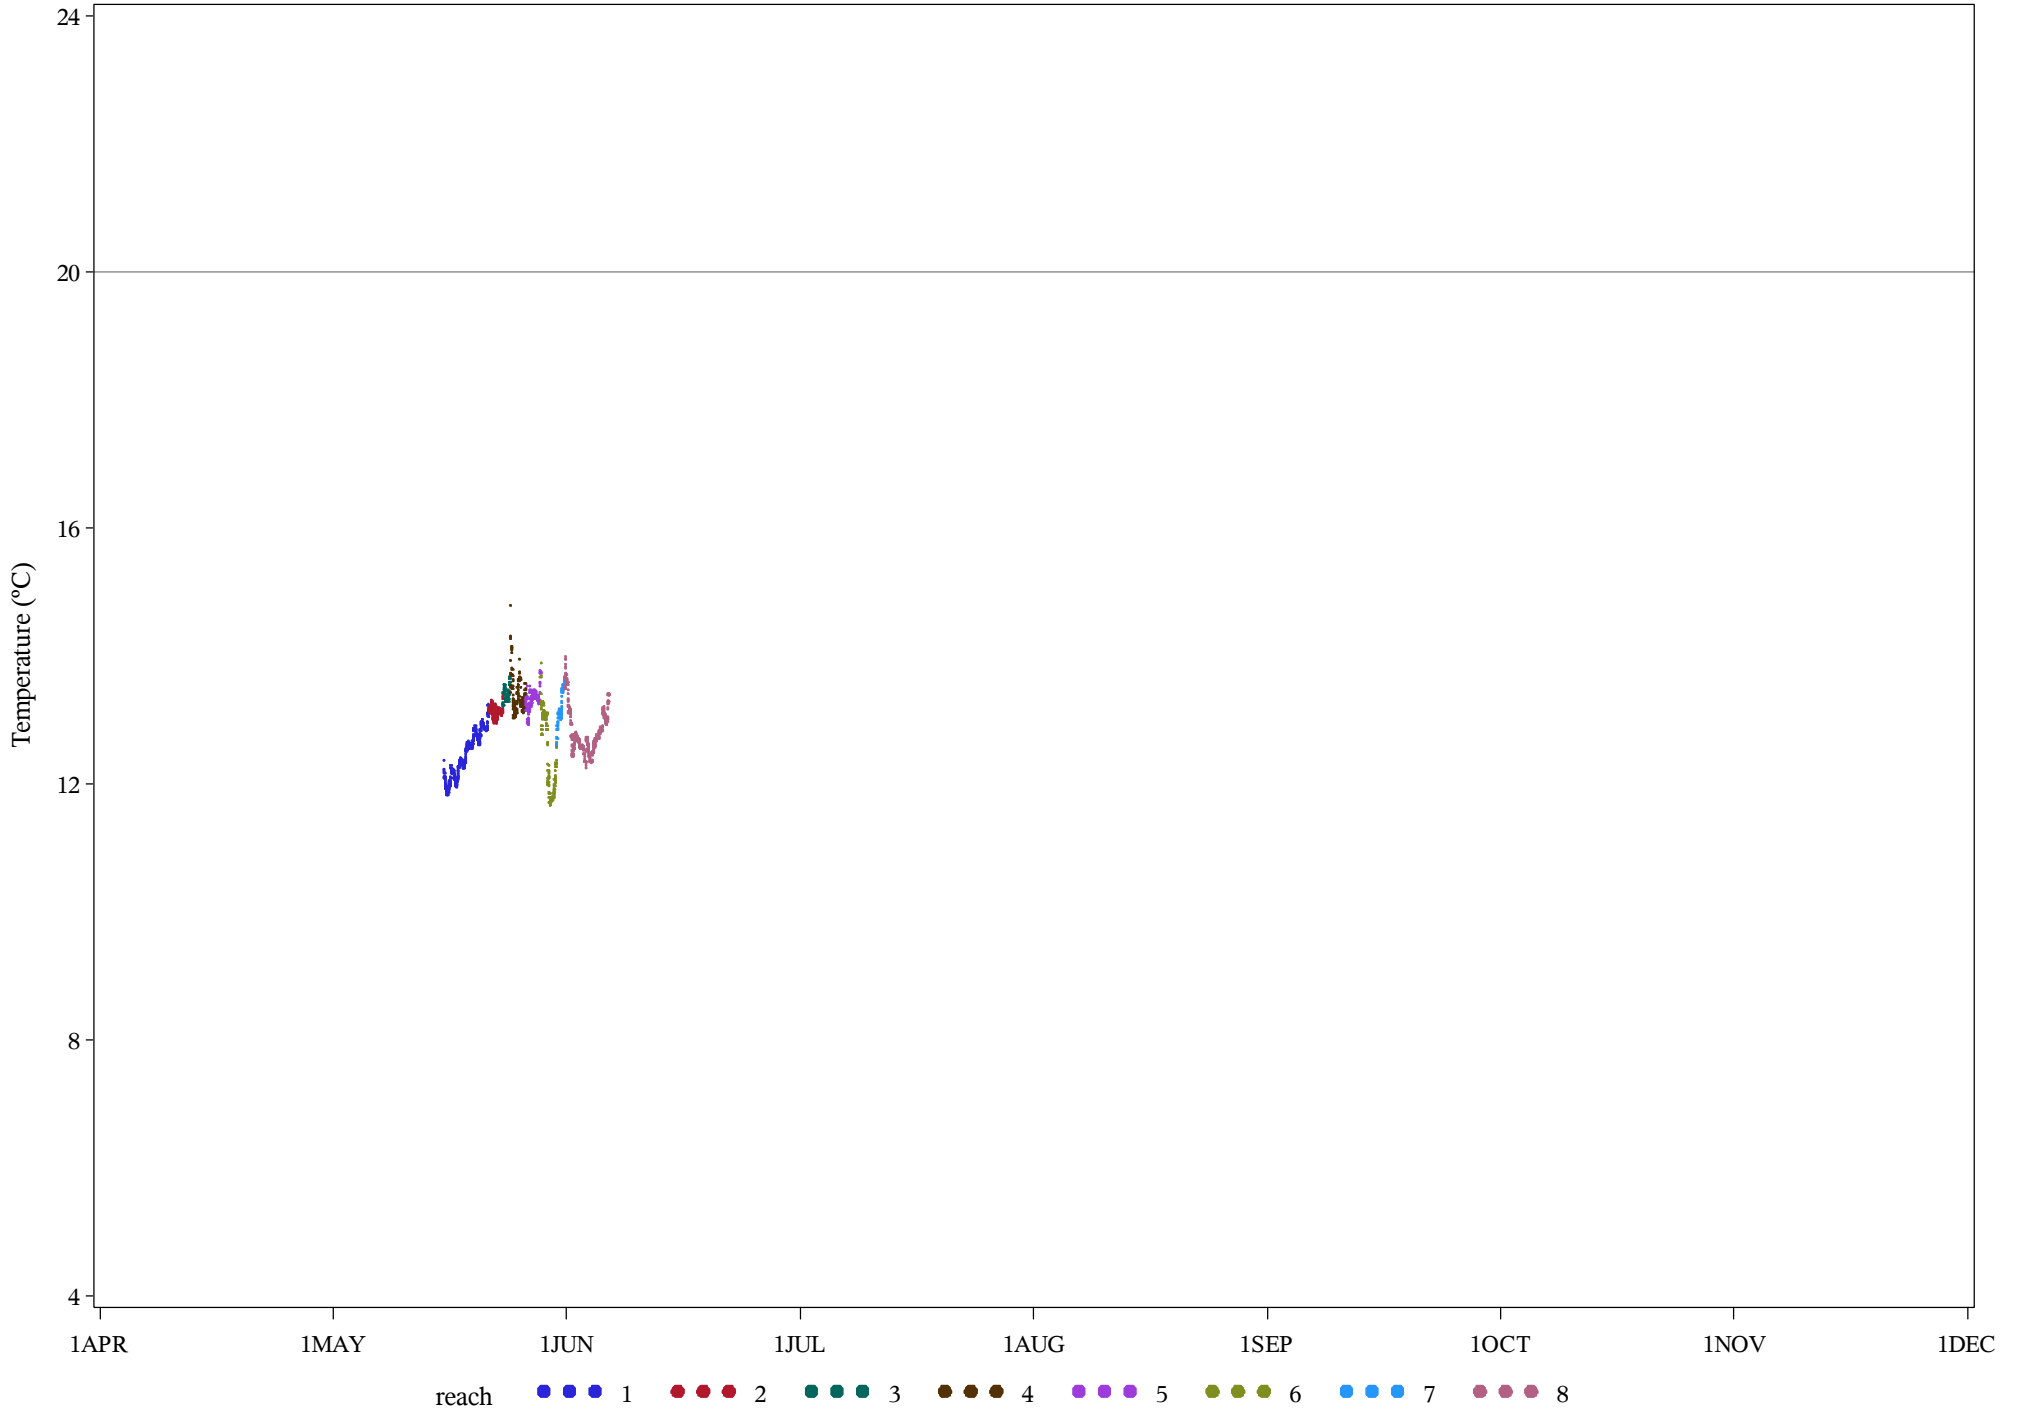

# Spring Chinook 4891A

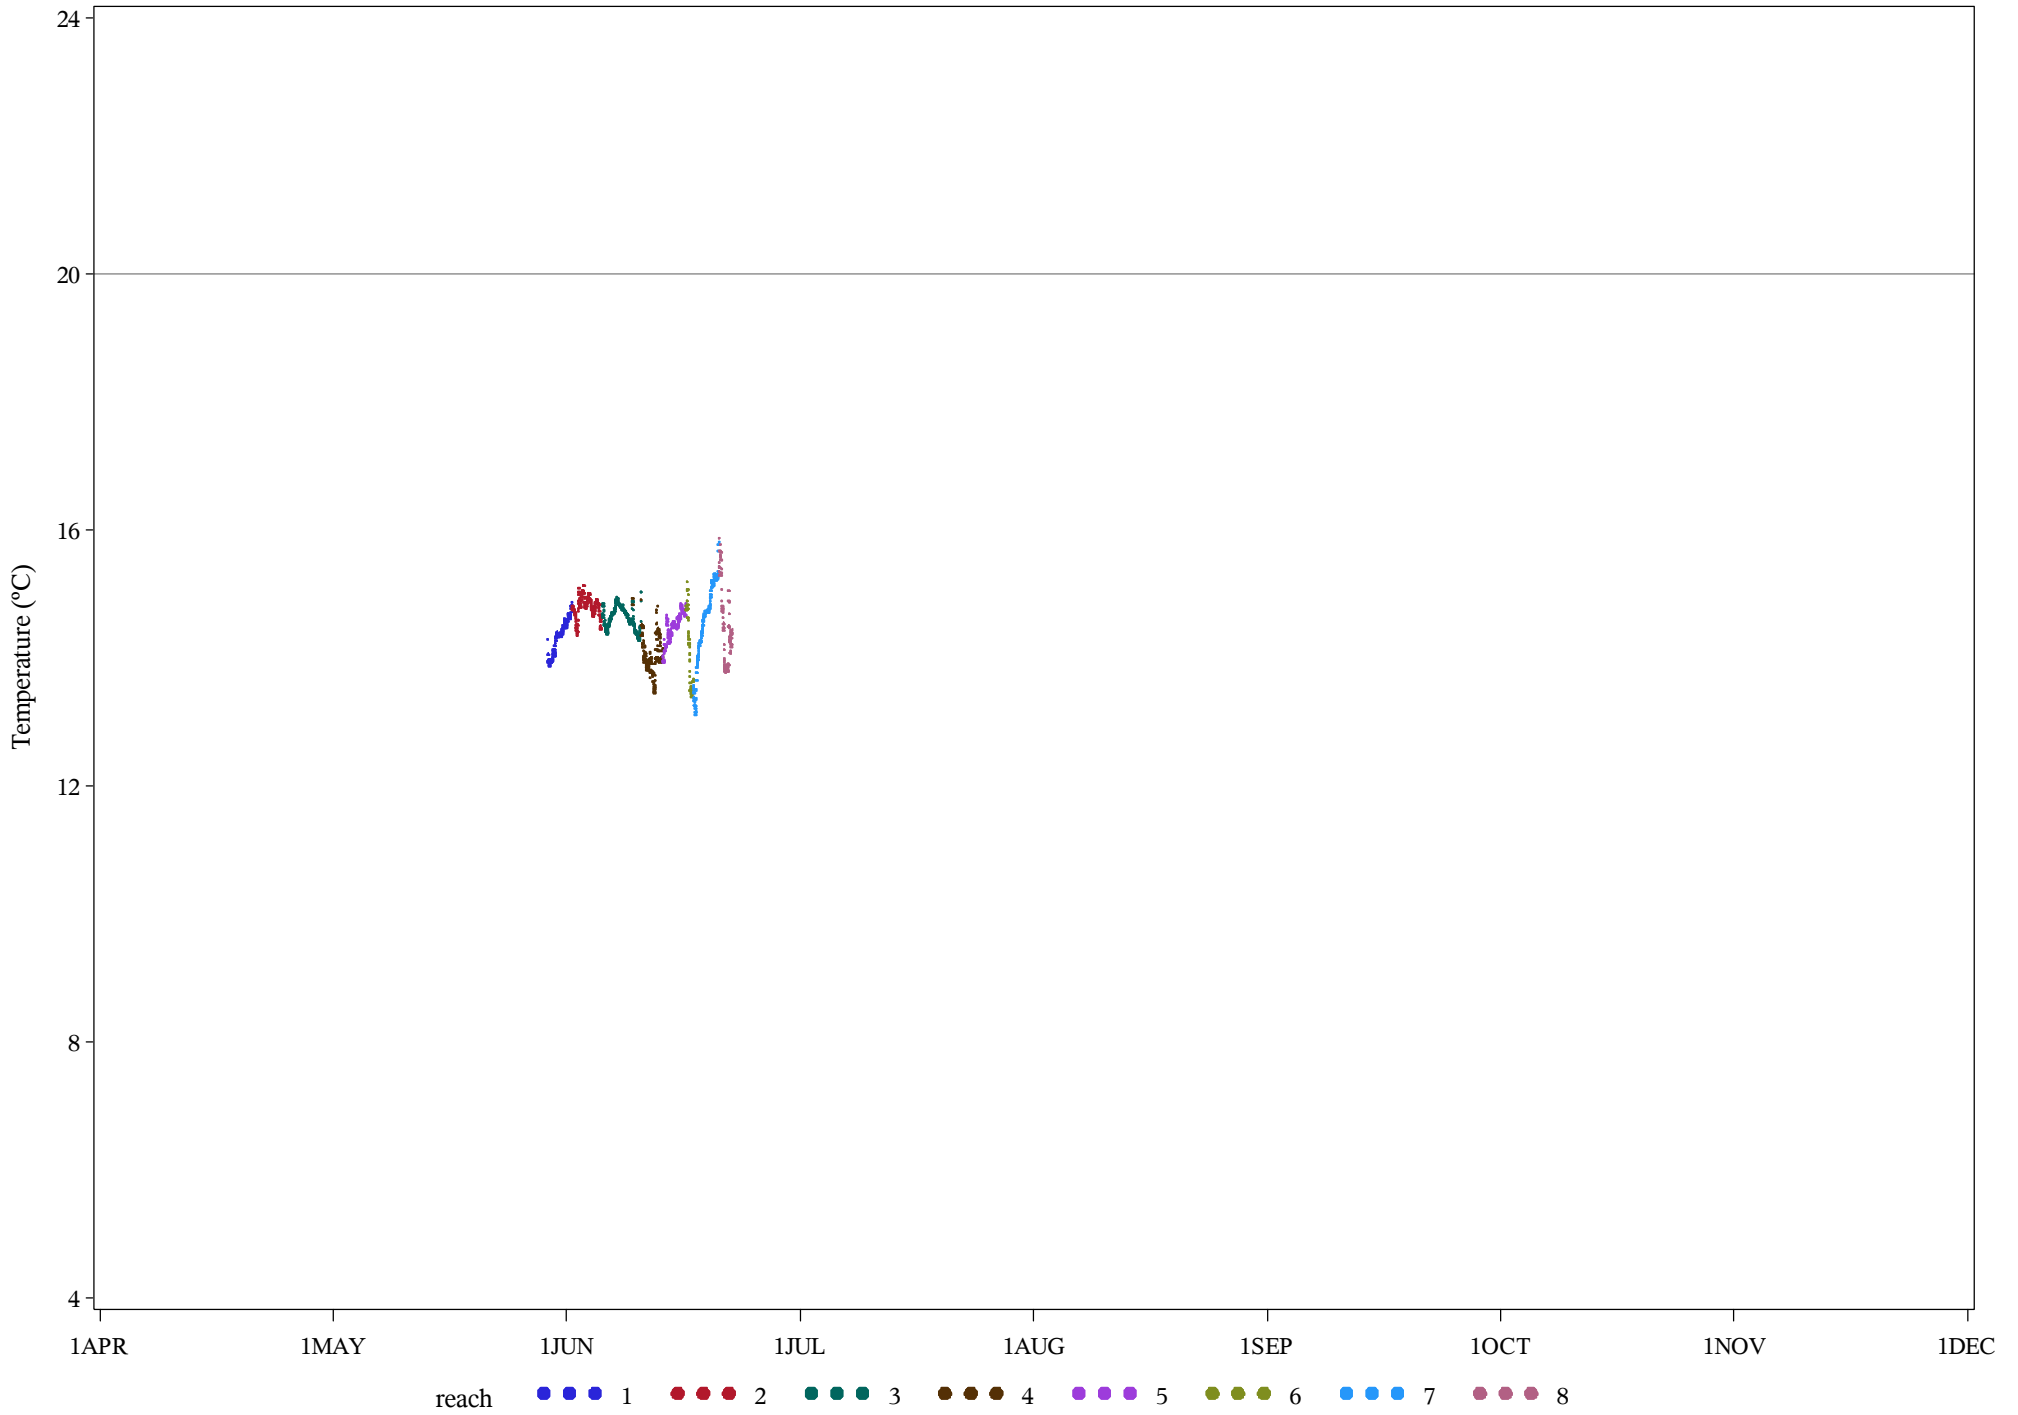

# Spring Chinook 4893A

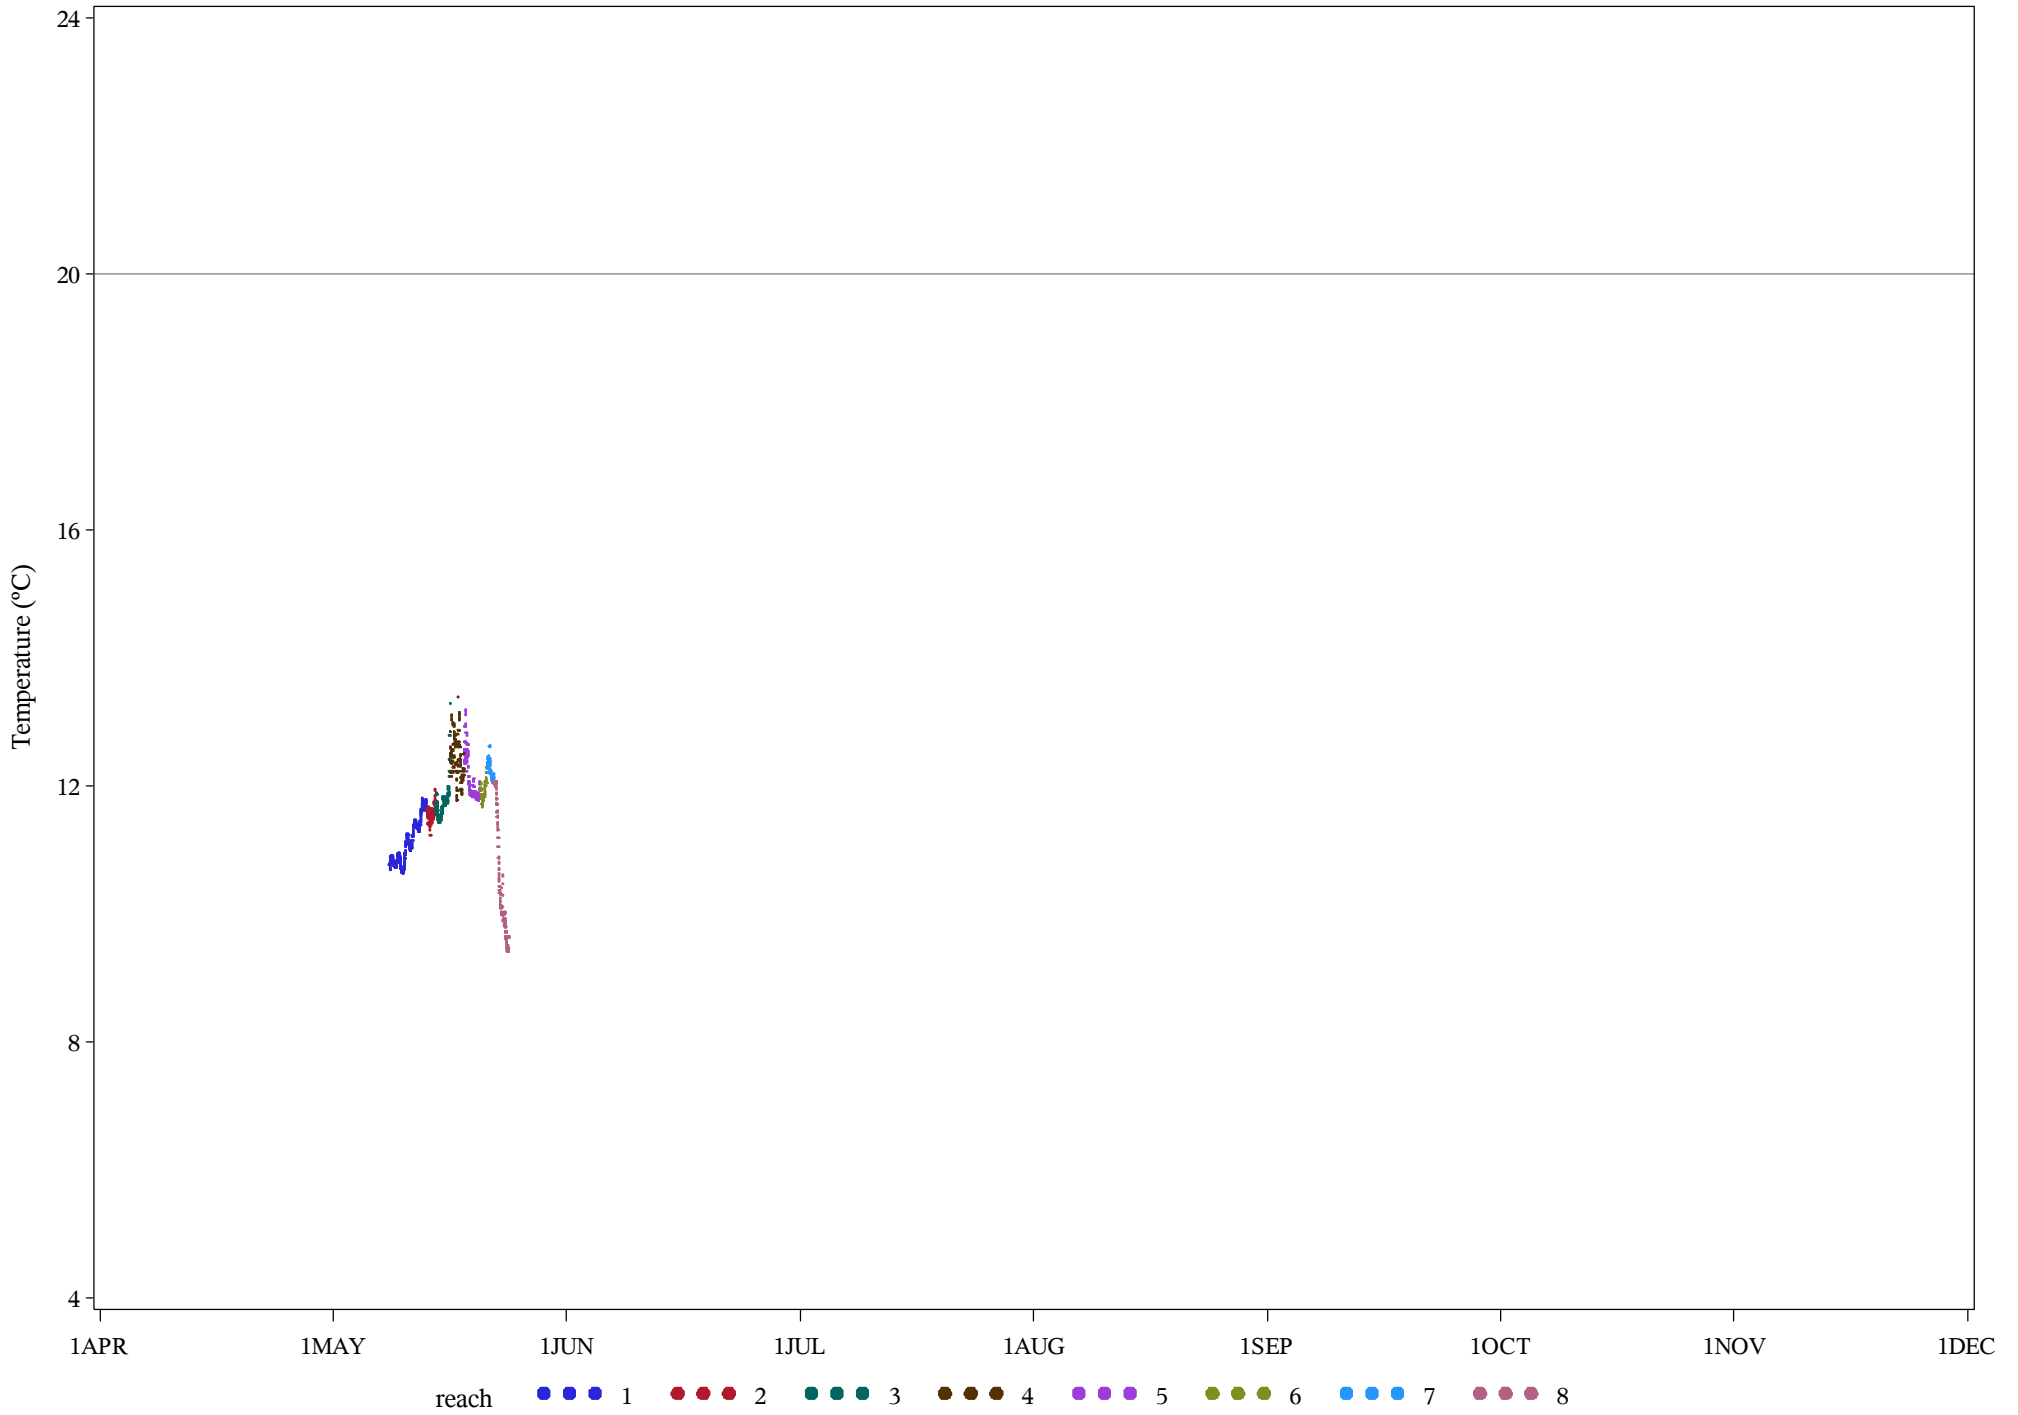

# Spring Chinook 4894A

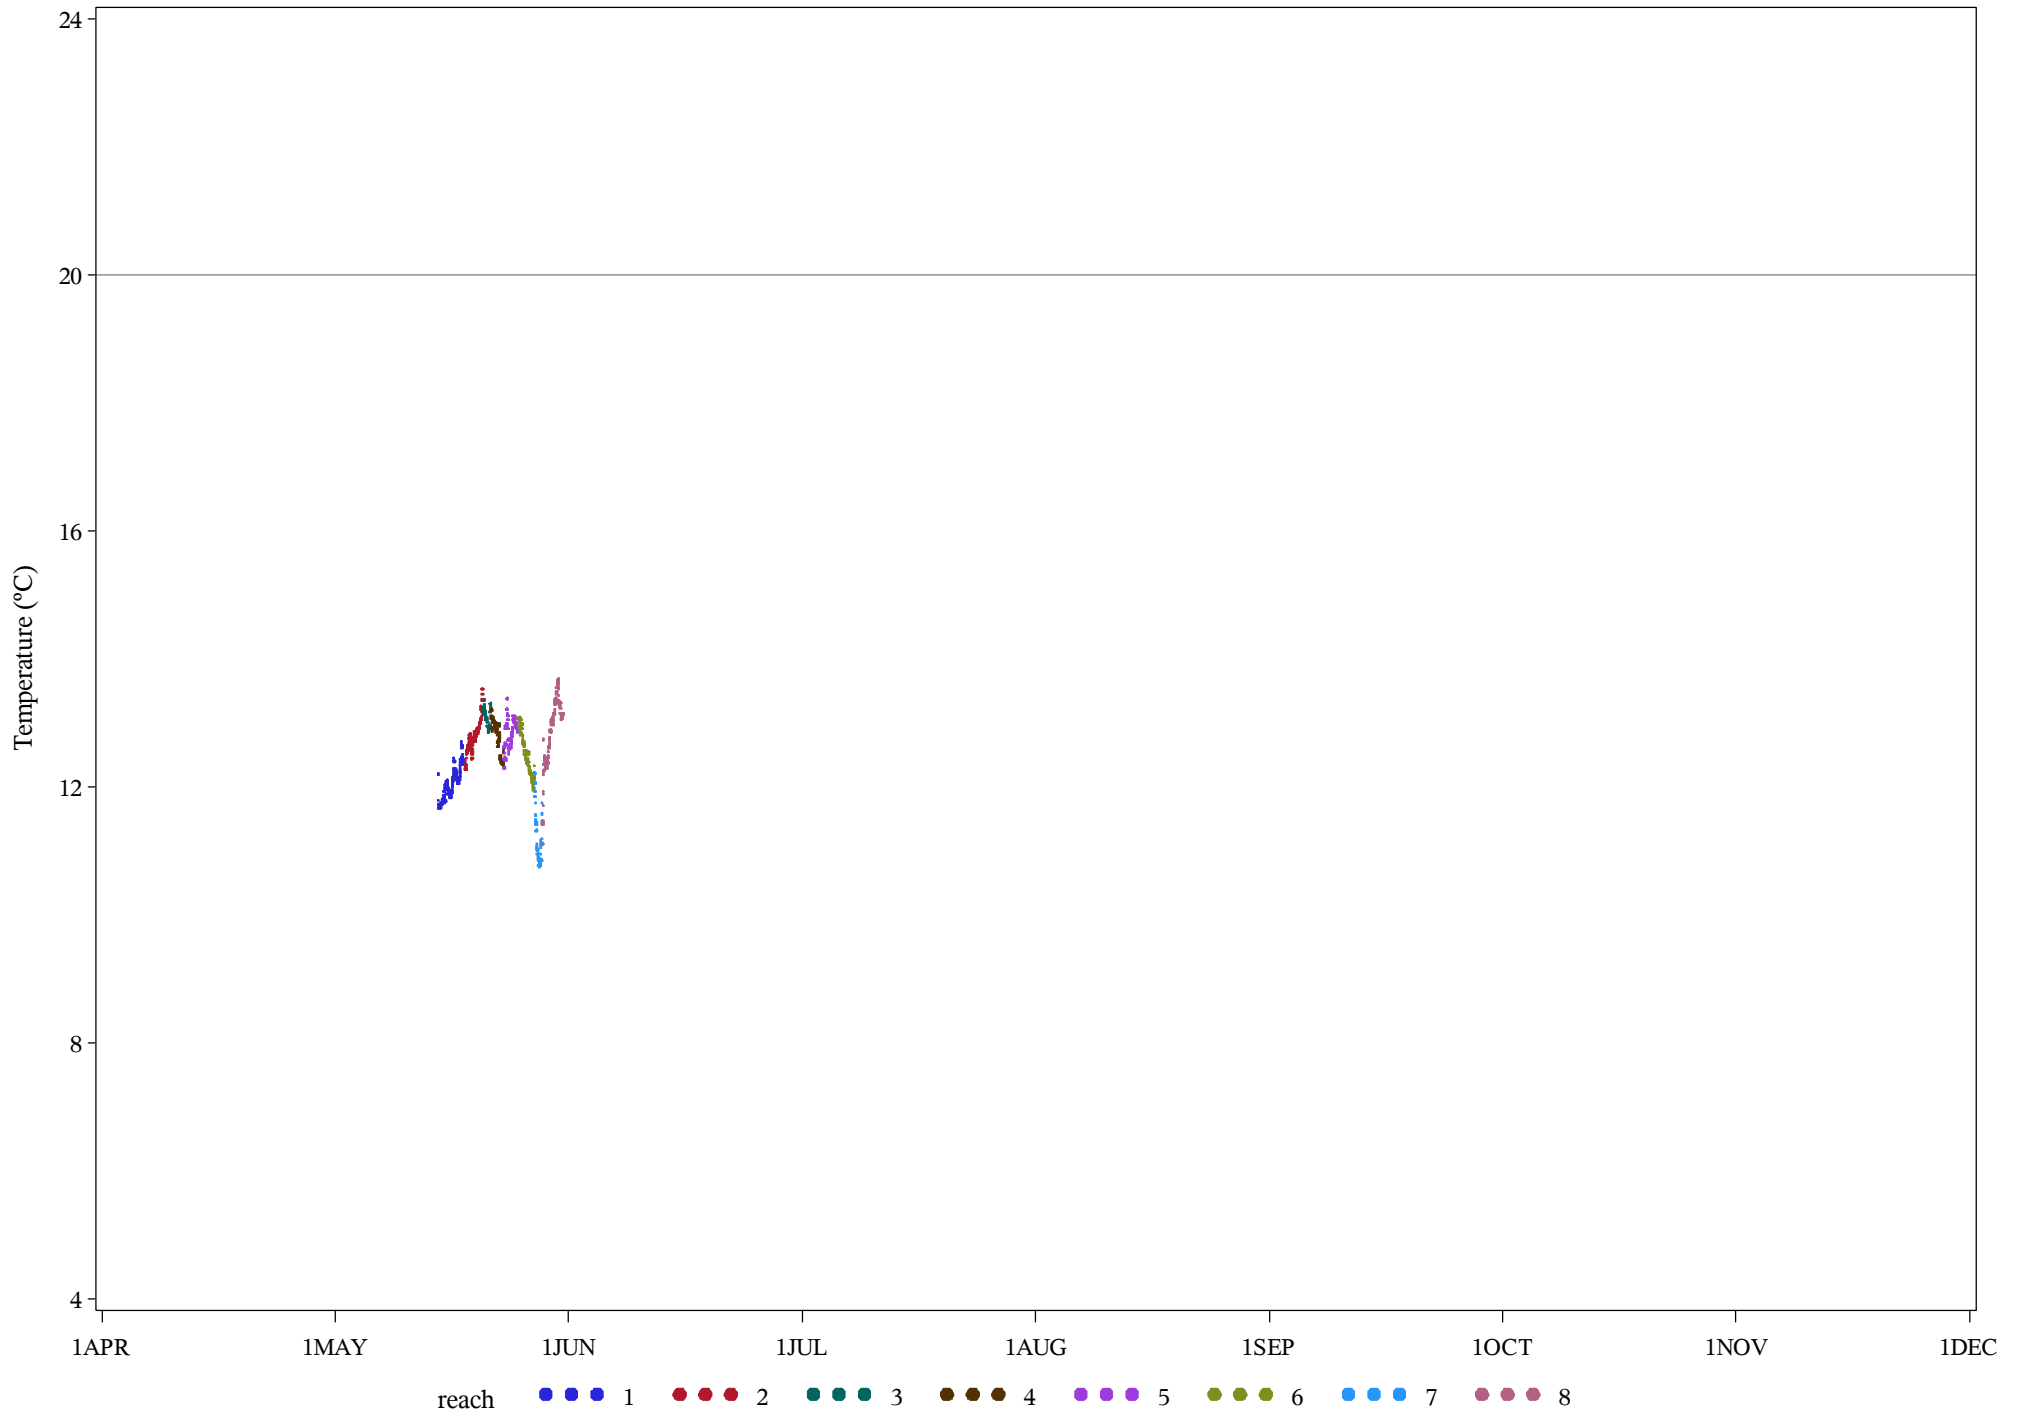



# Spring Chinook 4896A

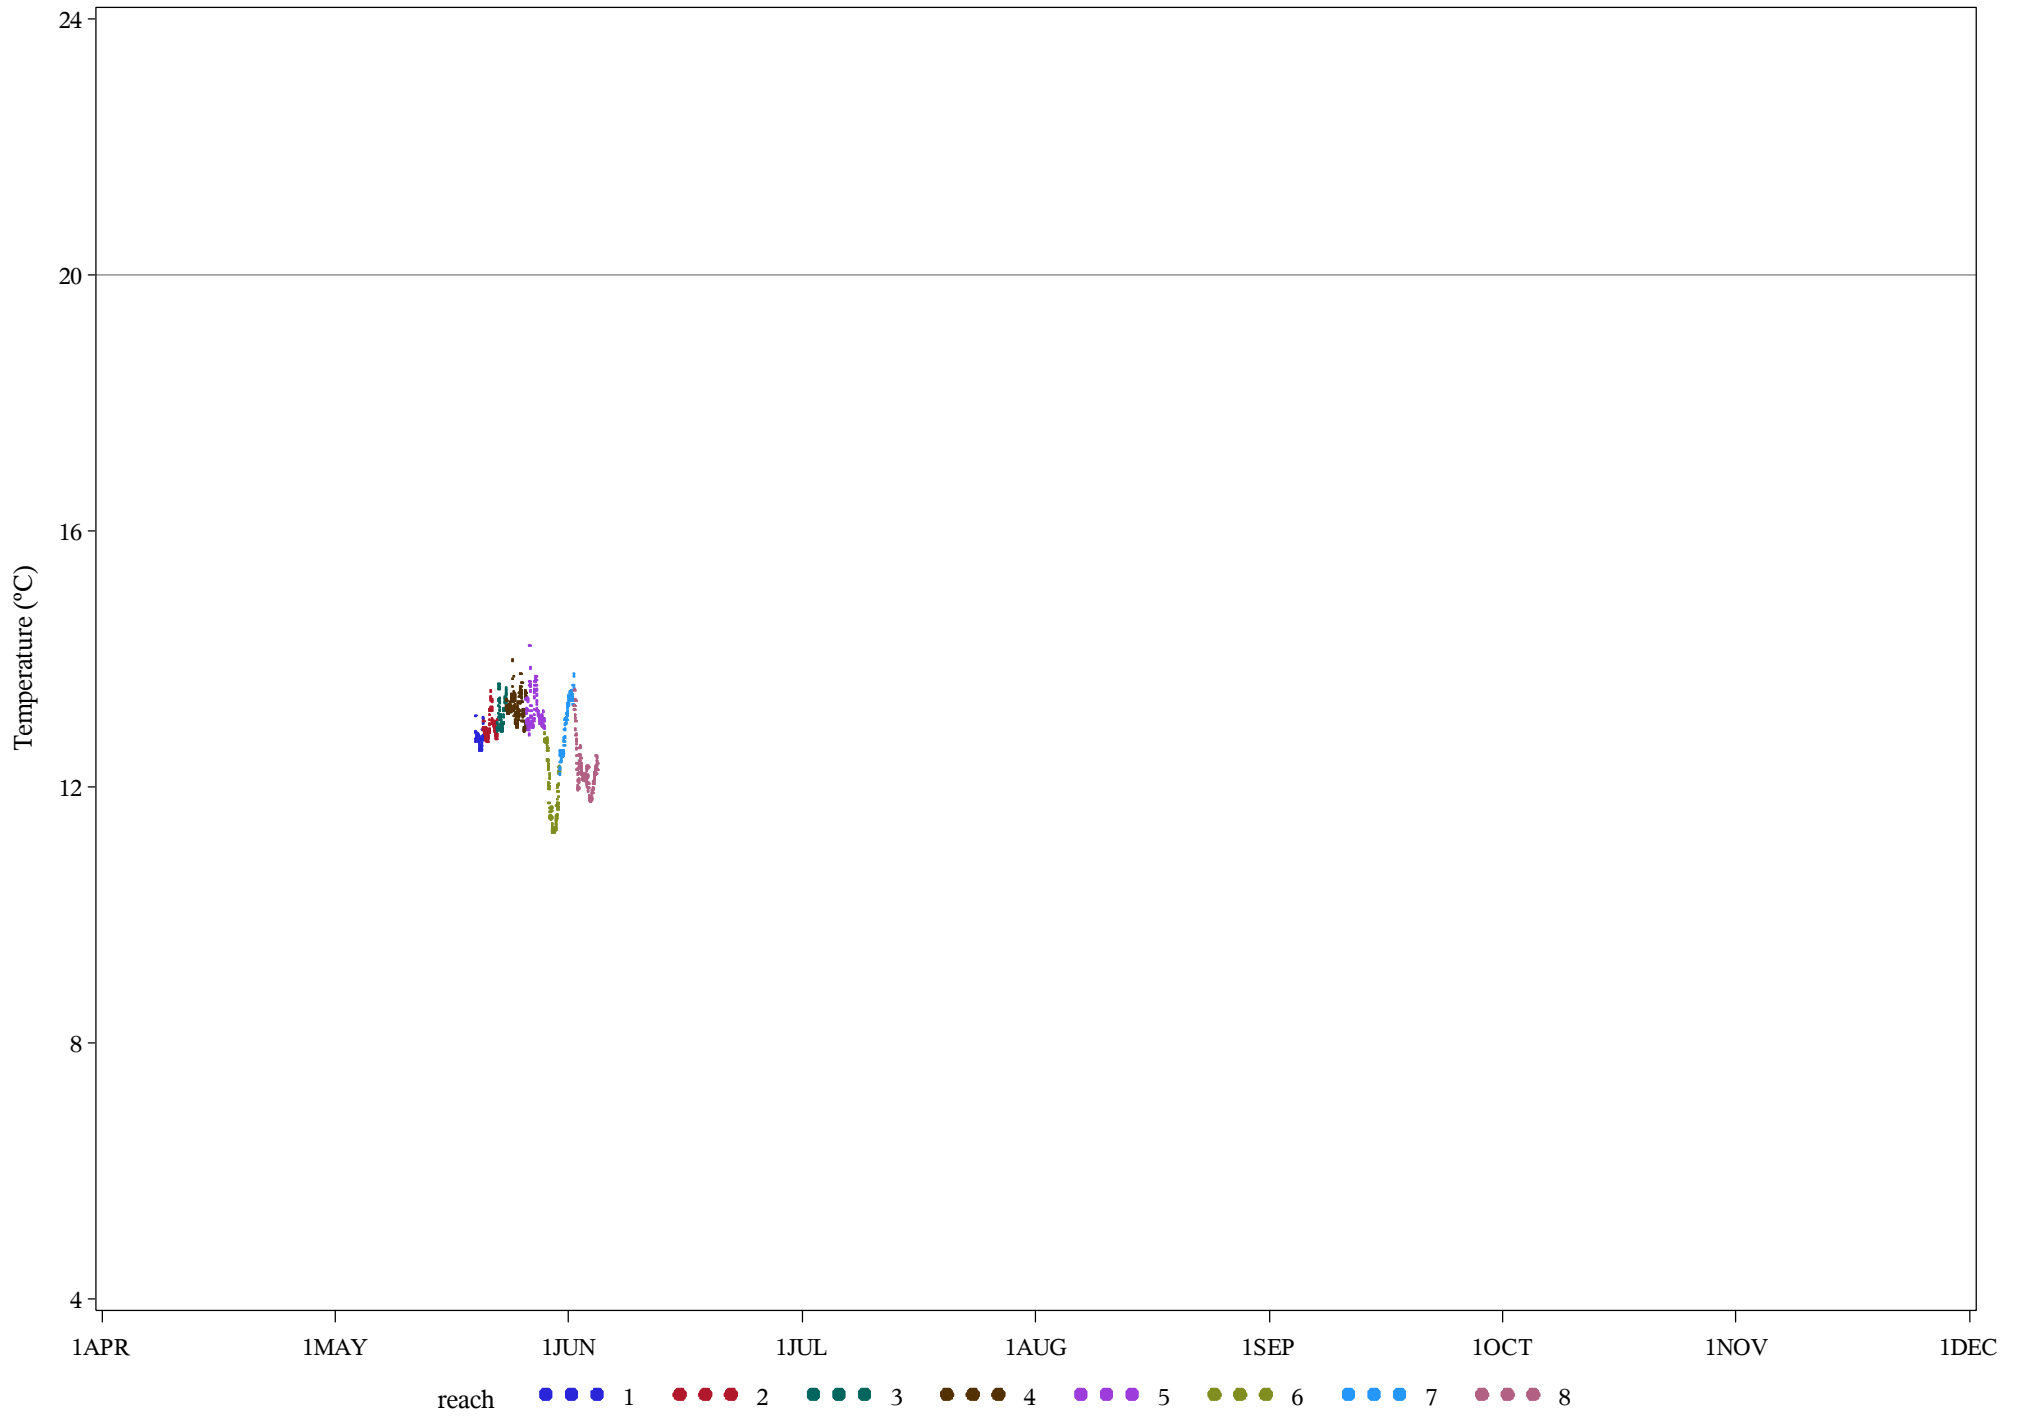

# Spring Chinook 4897A

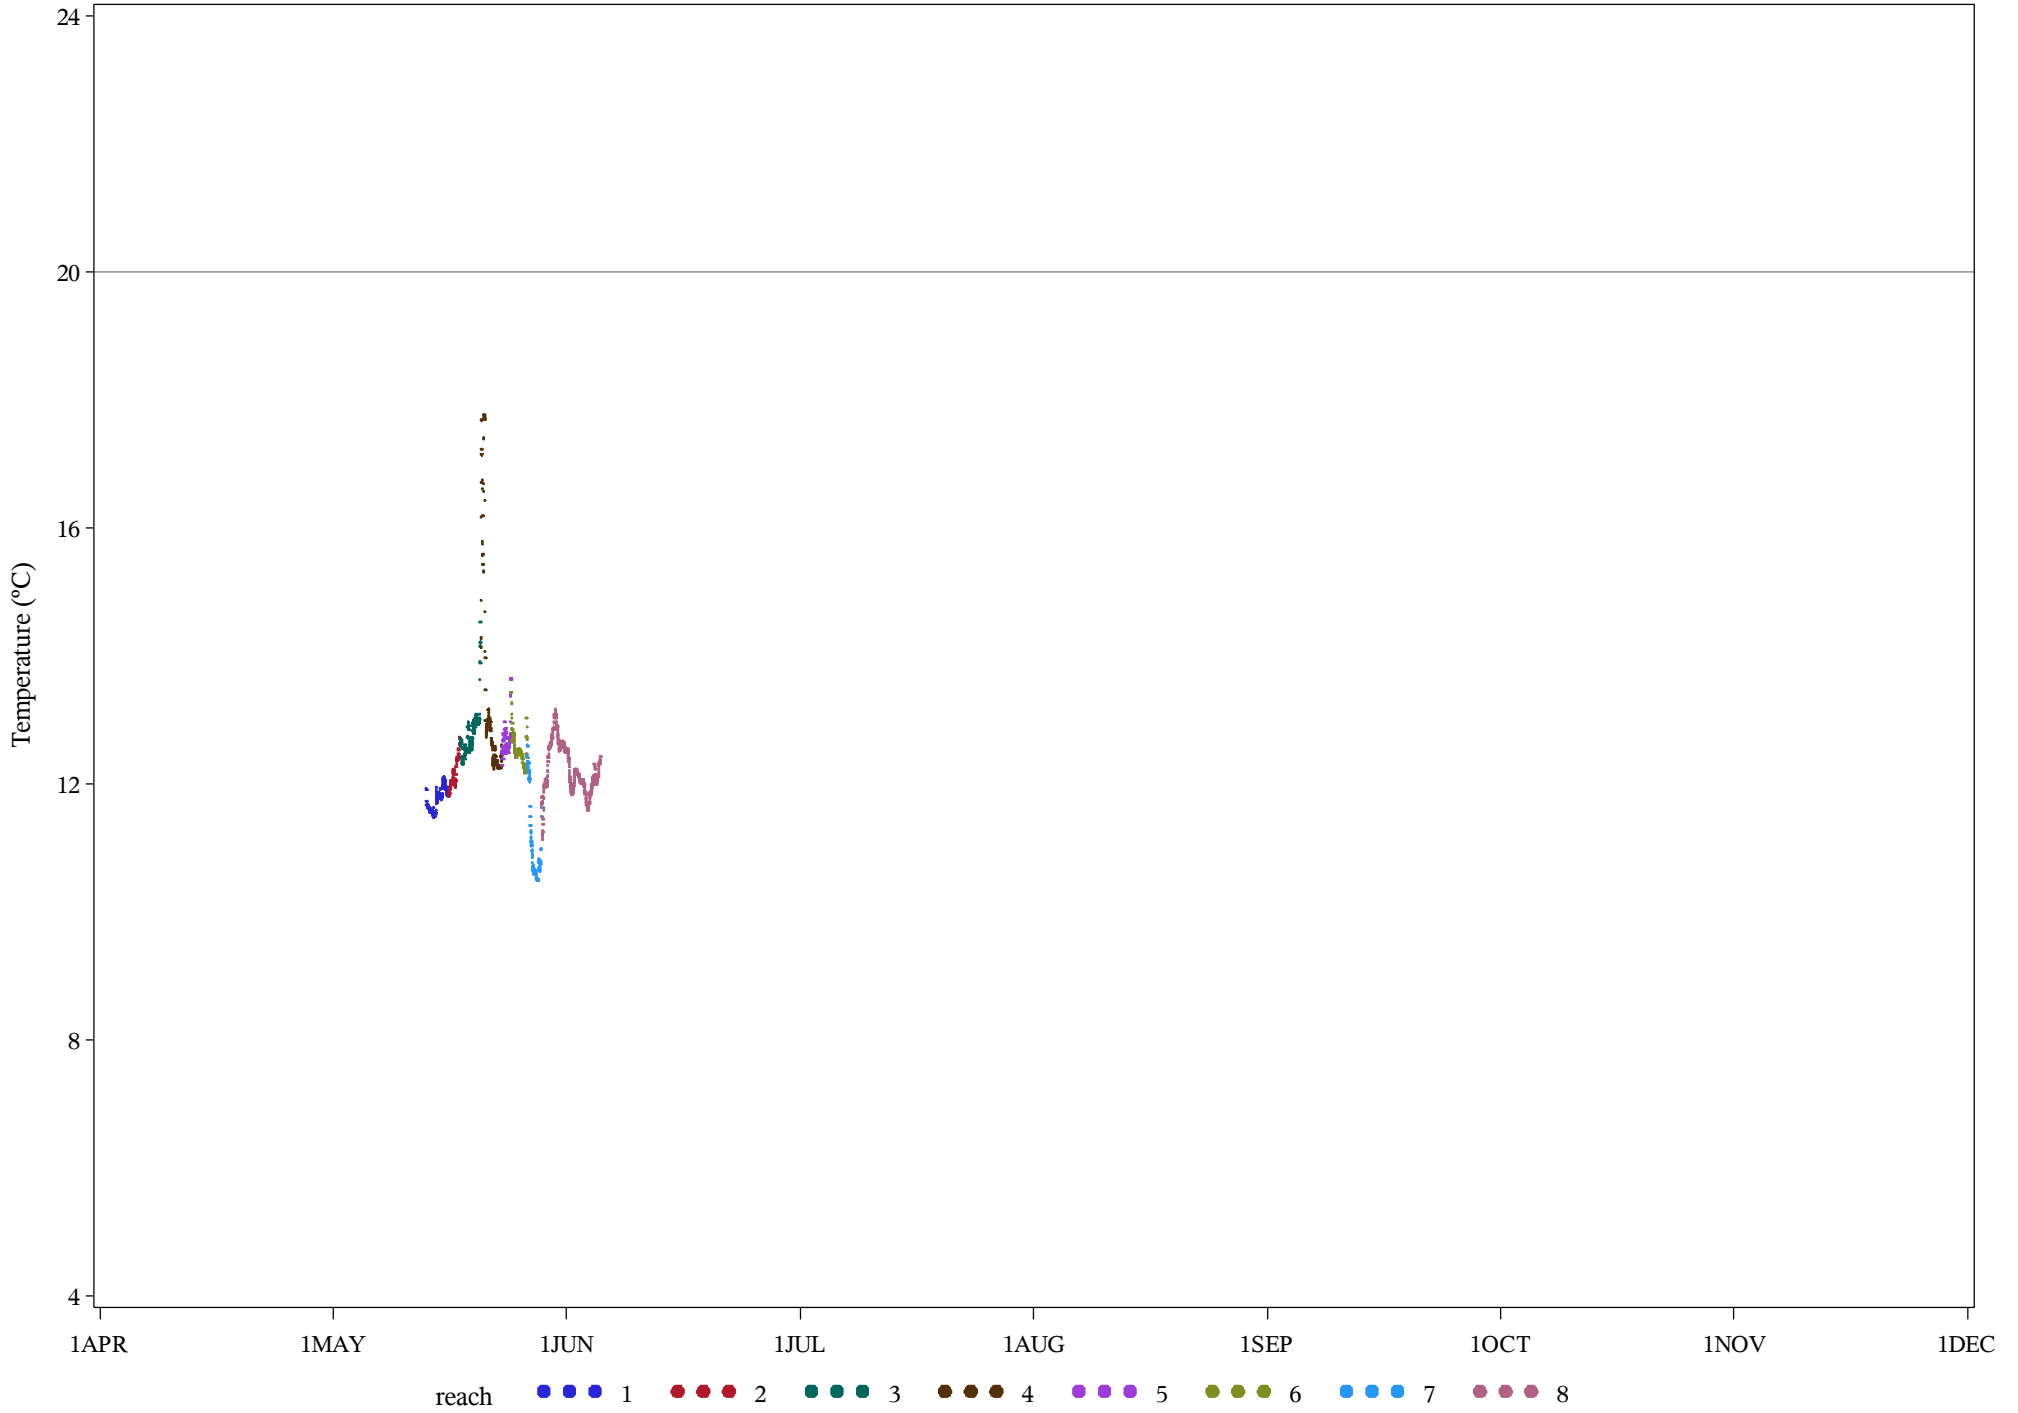

# Spring Chinook 4900A

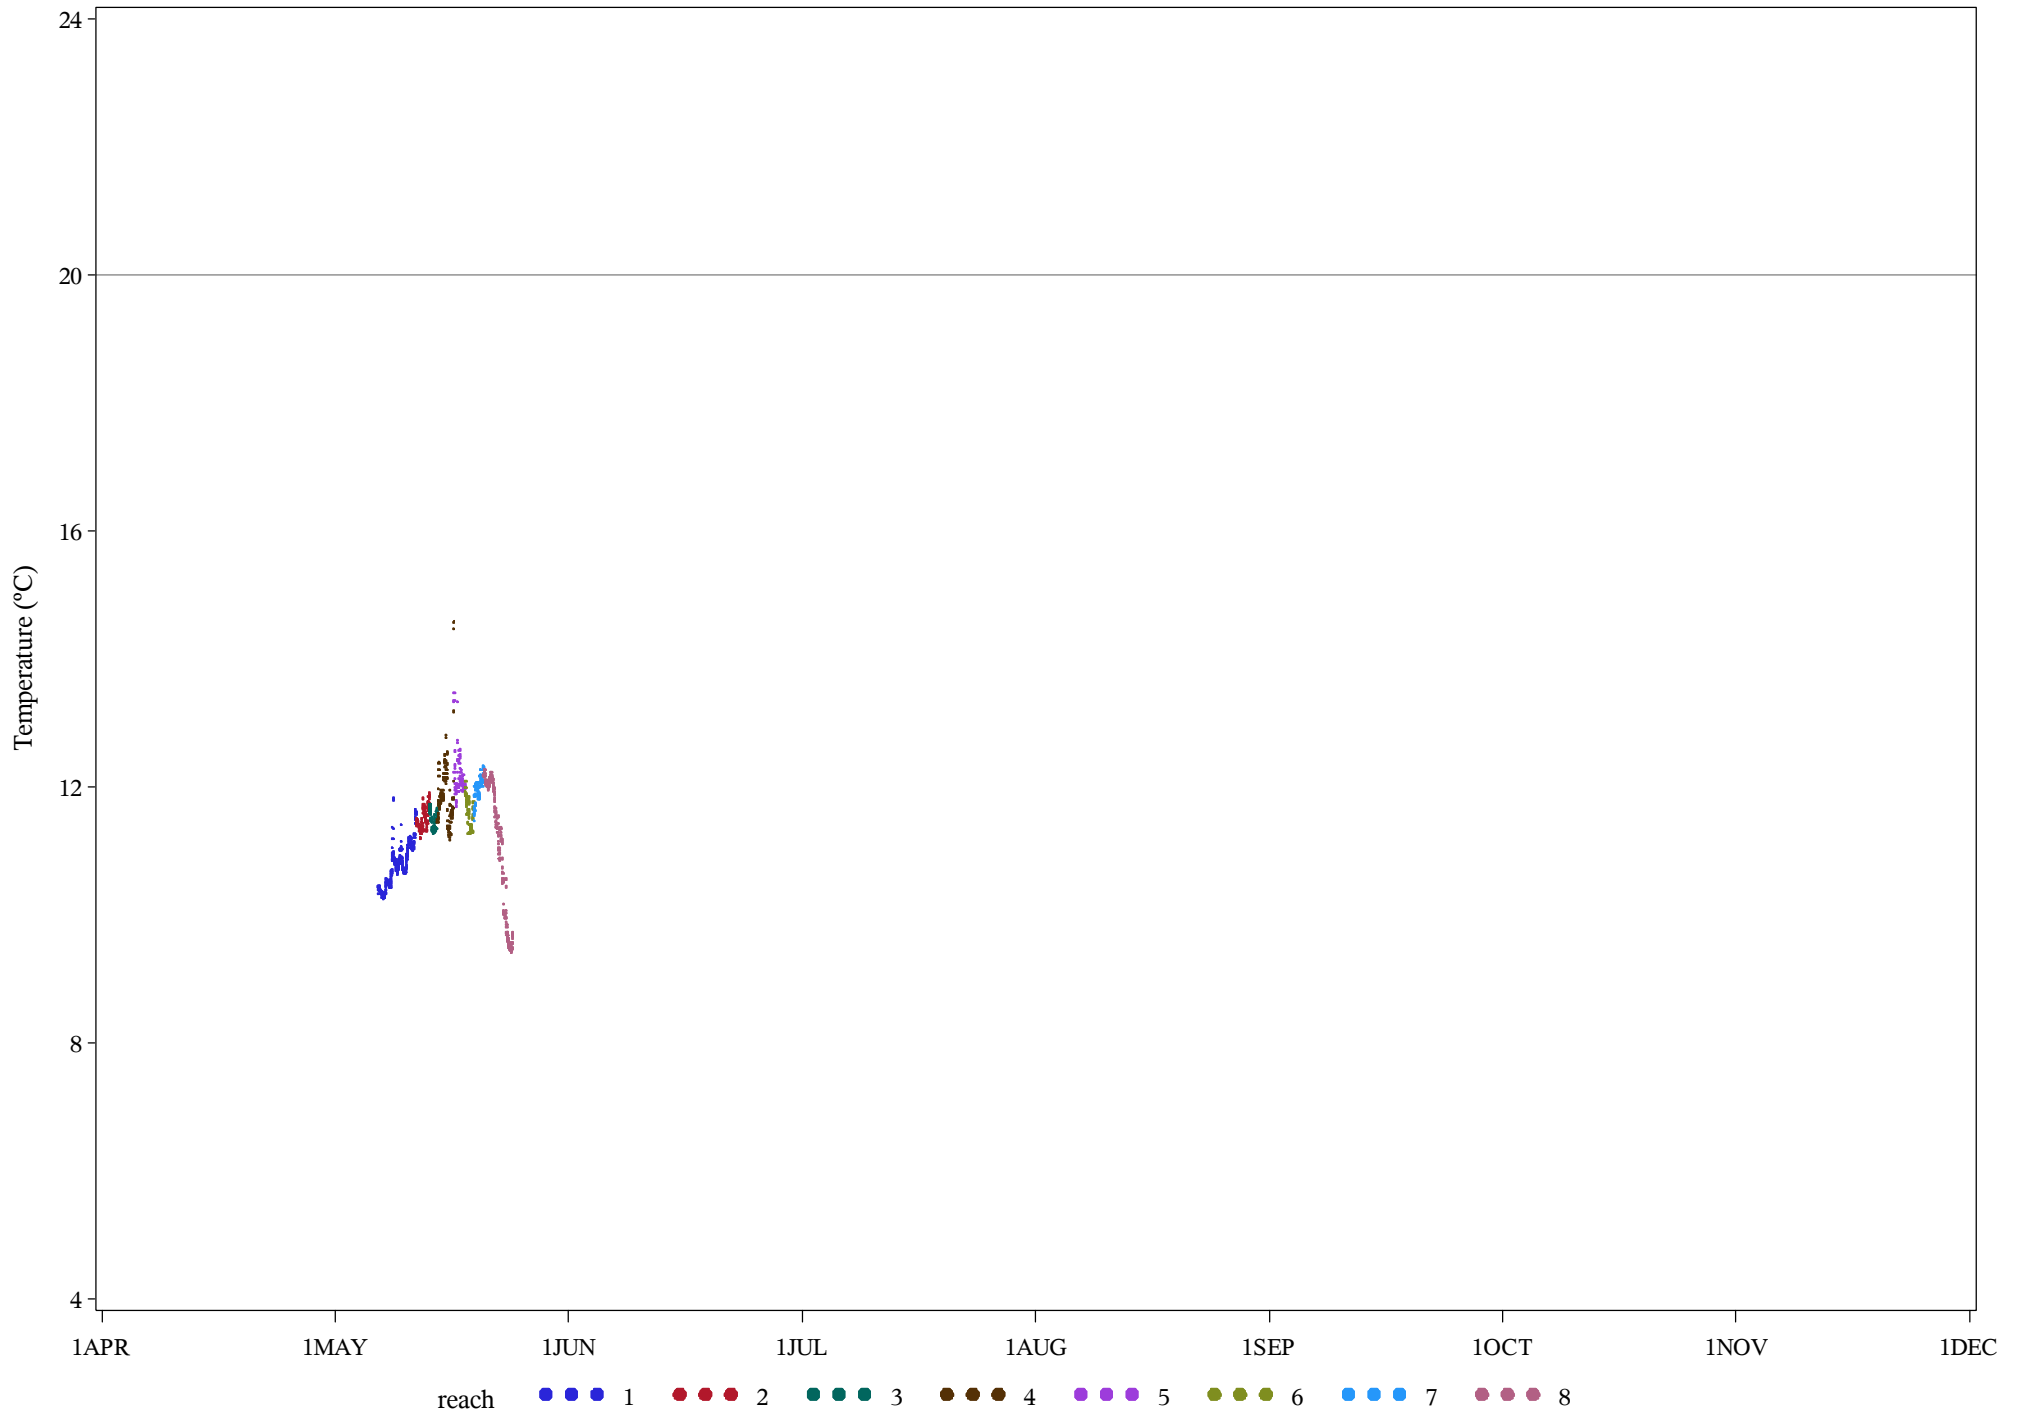

# Spring Chinook 4903A

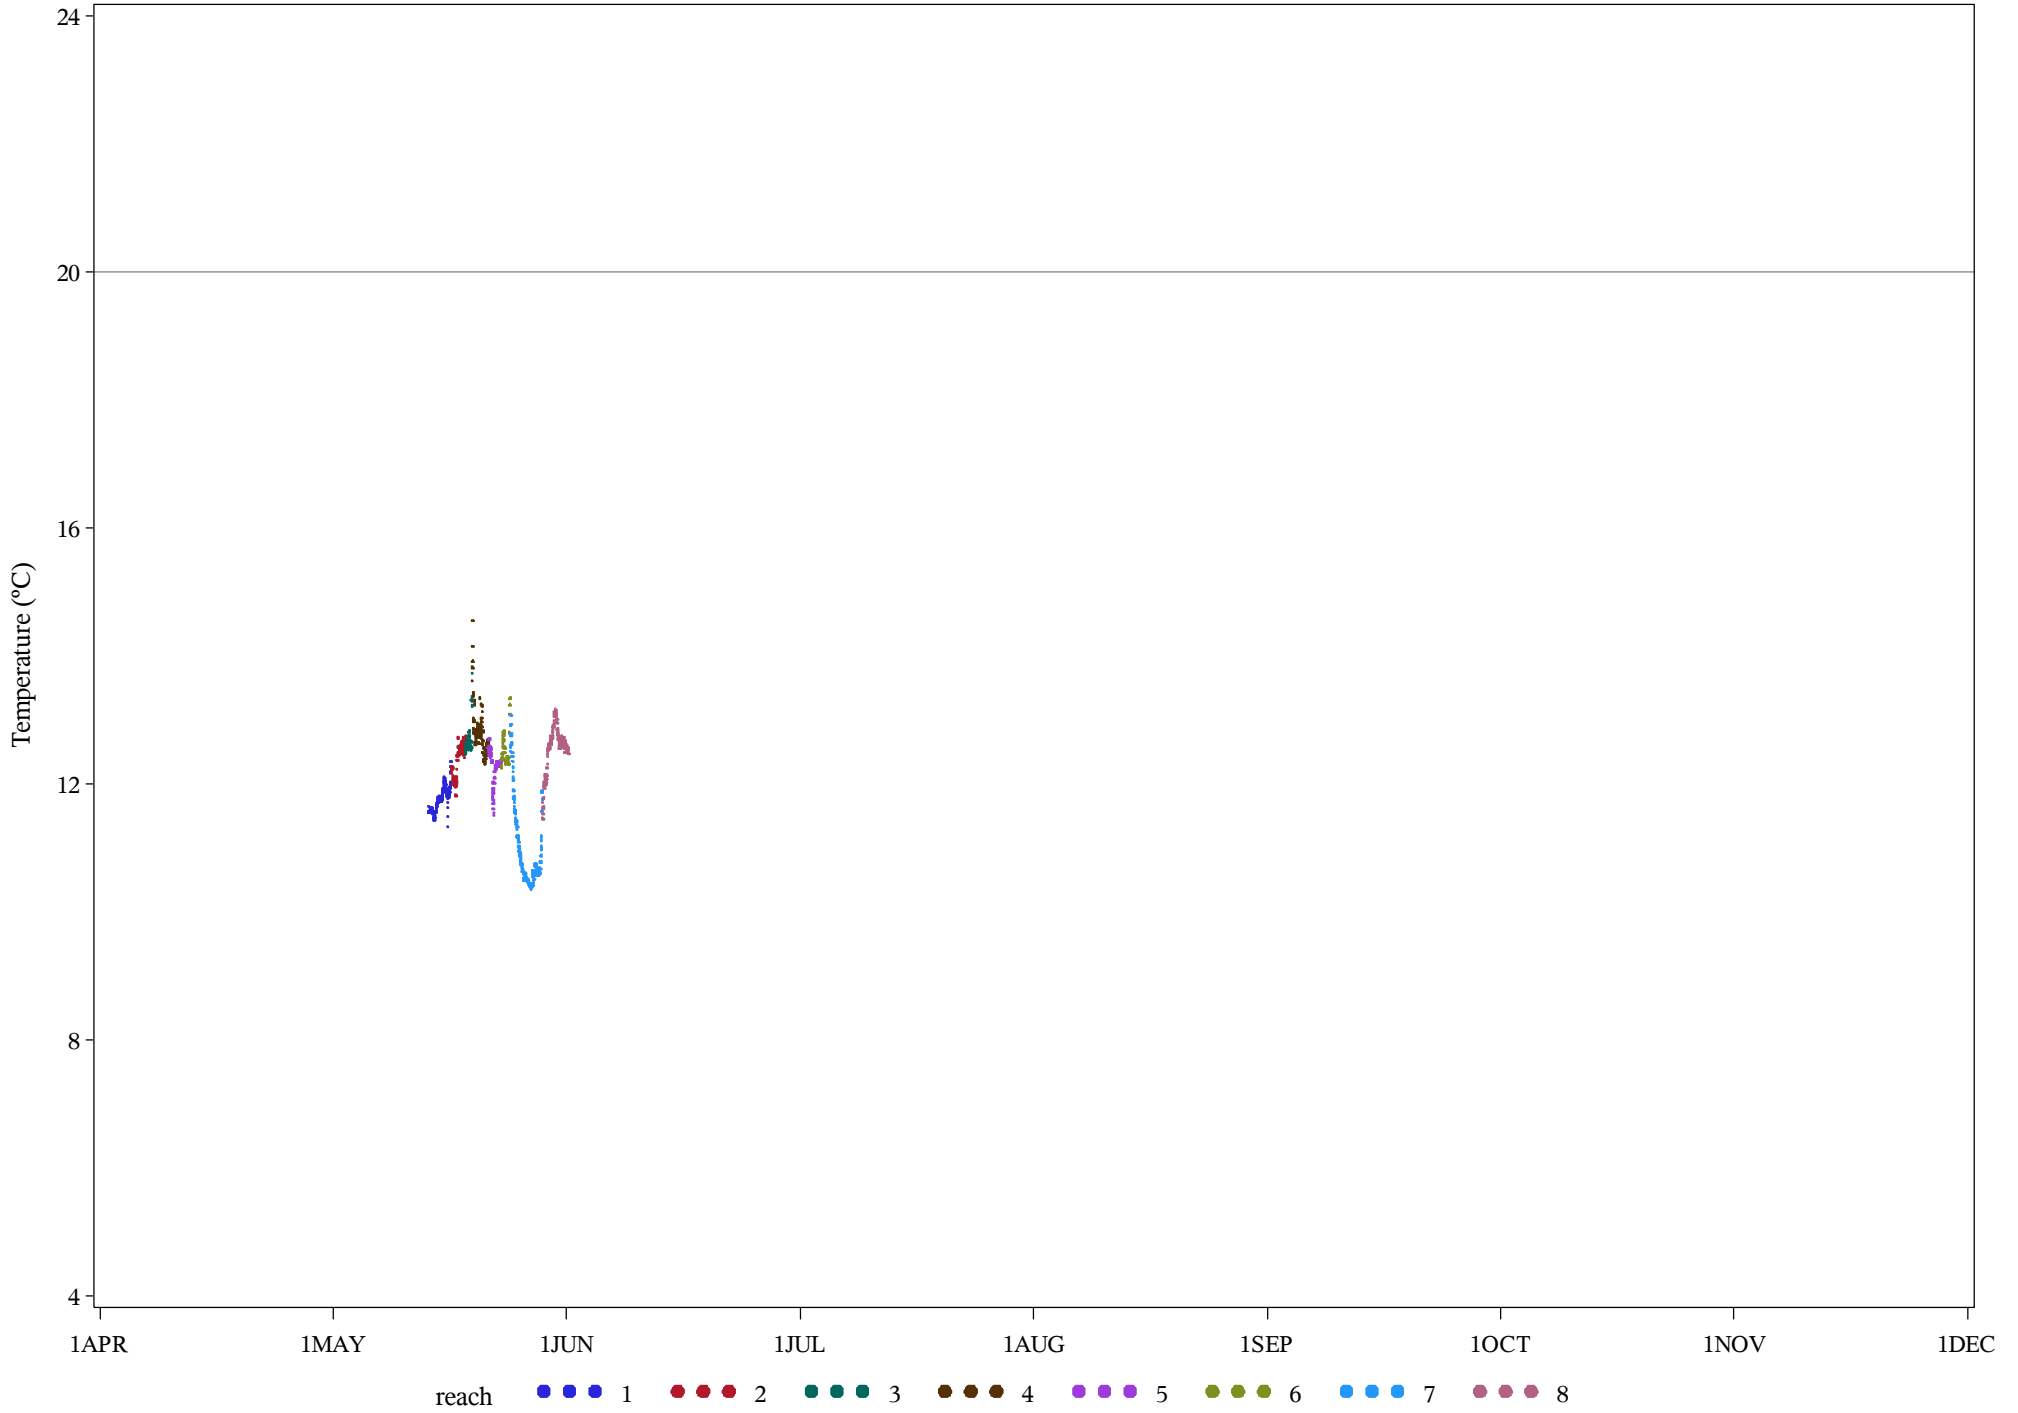

# Spring Chinook 4906A

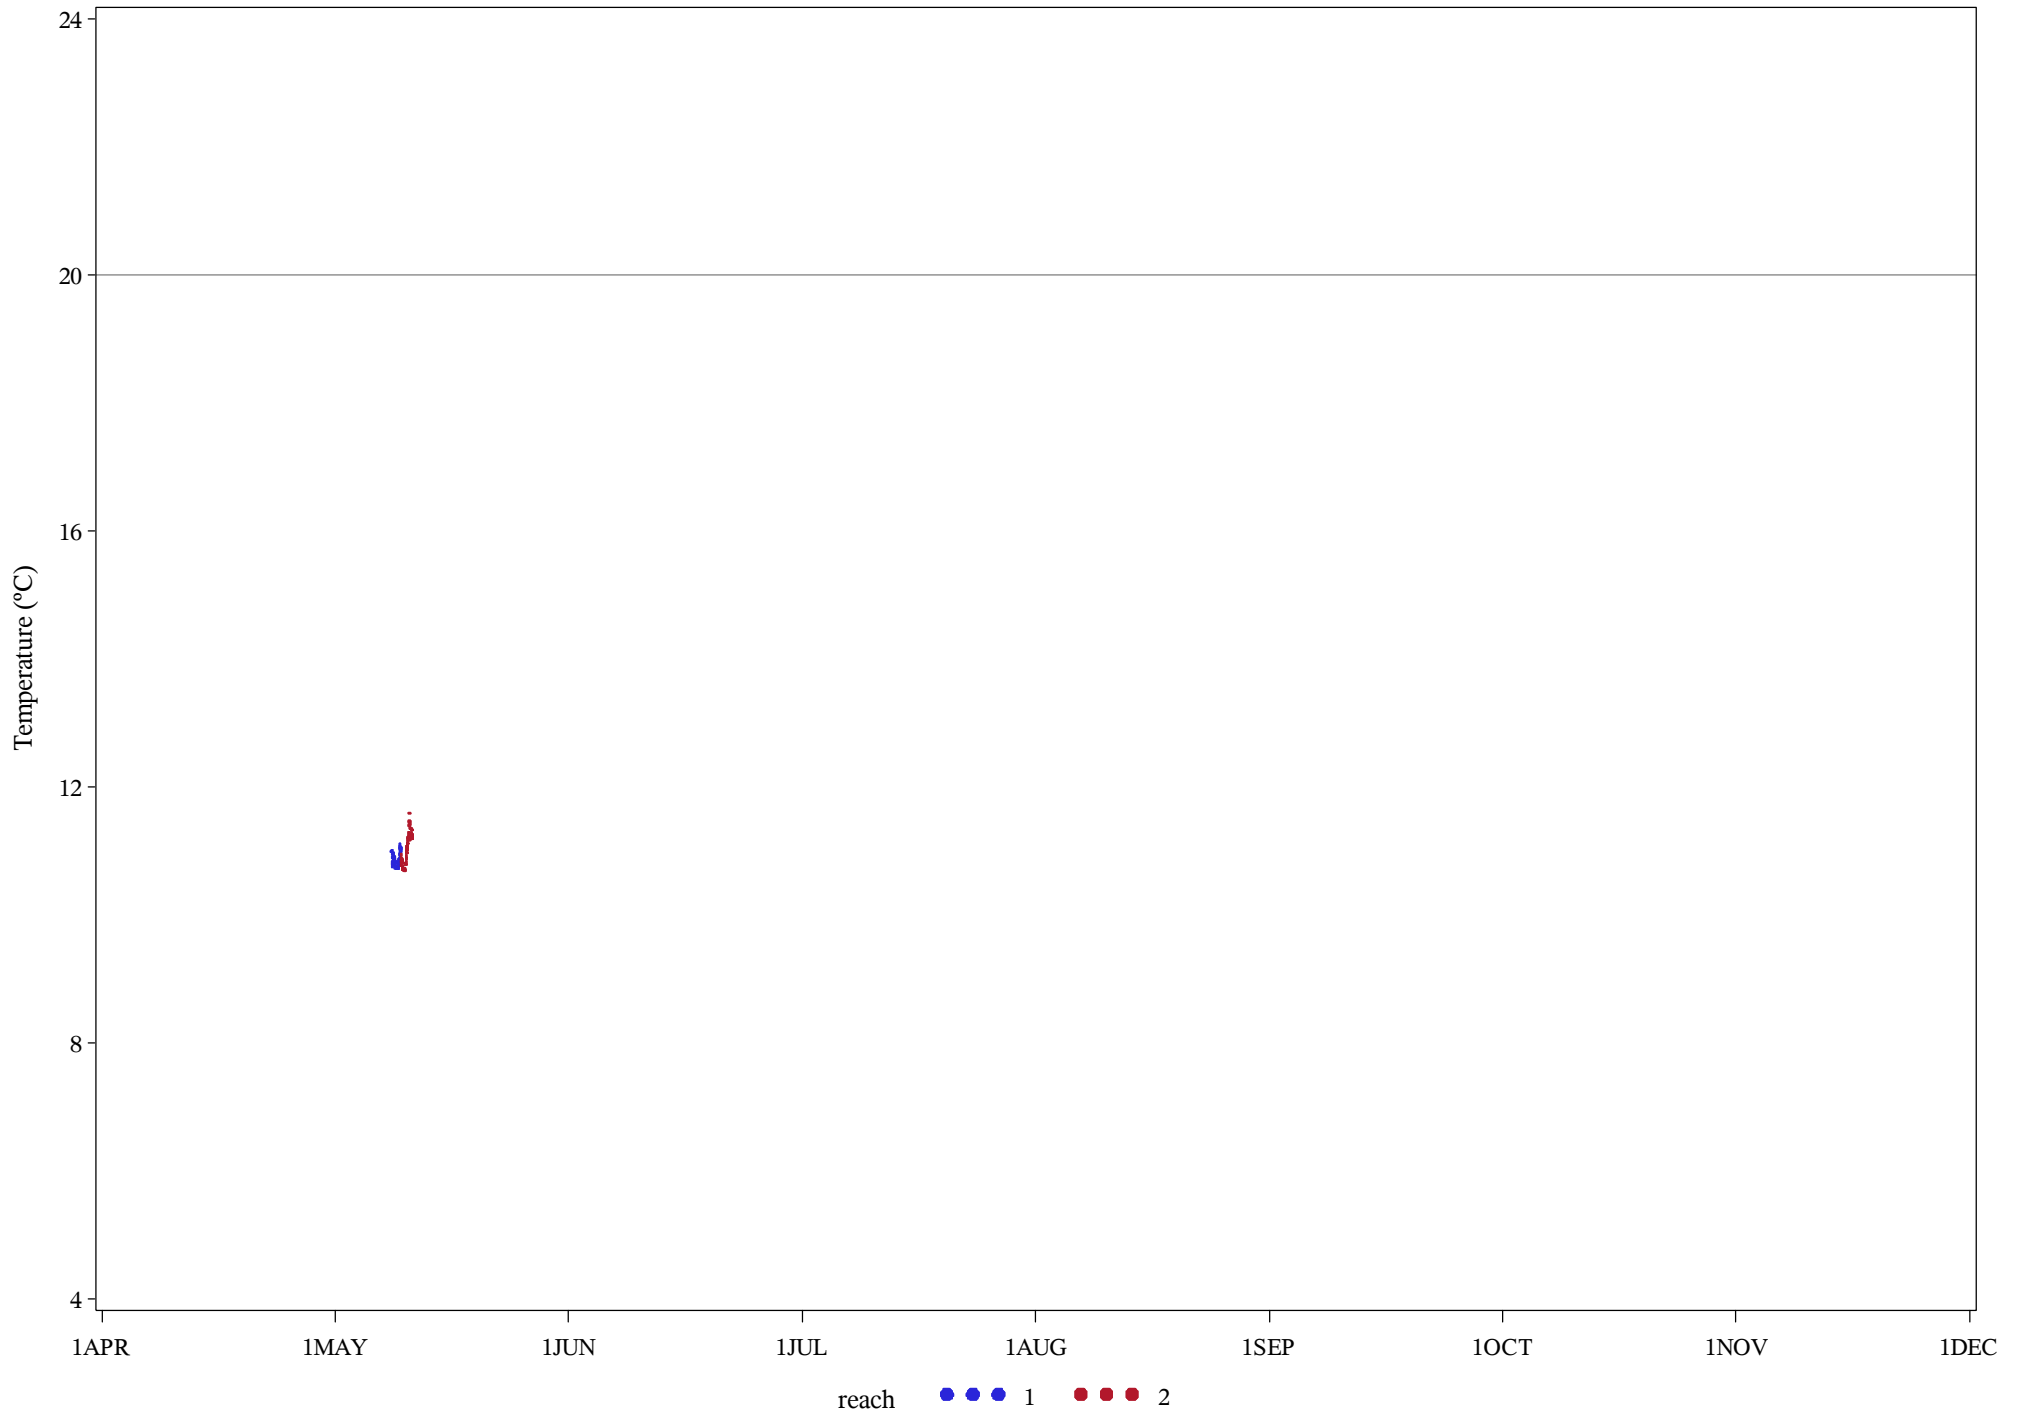

# Spring Chinook 4909A

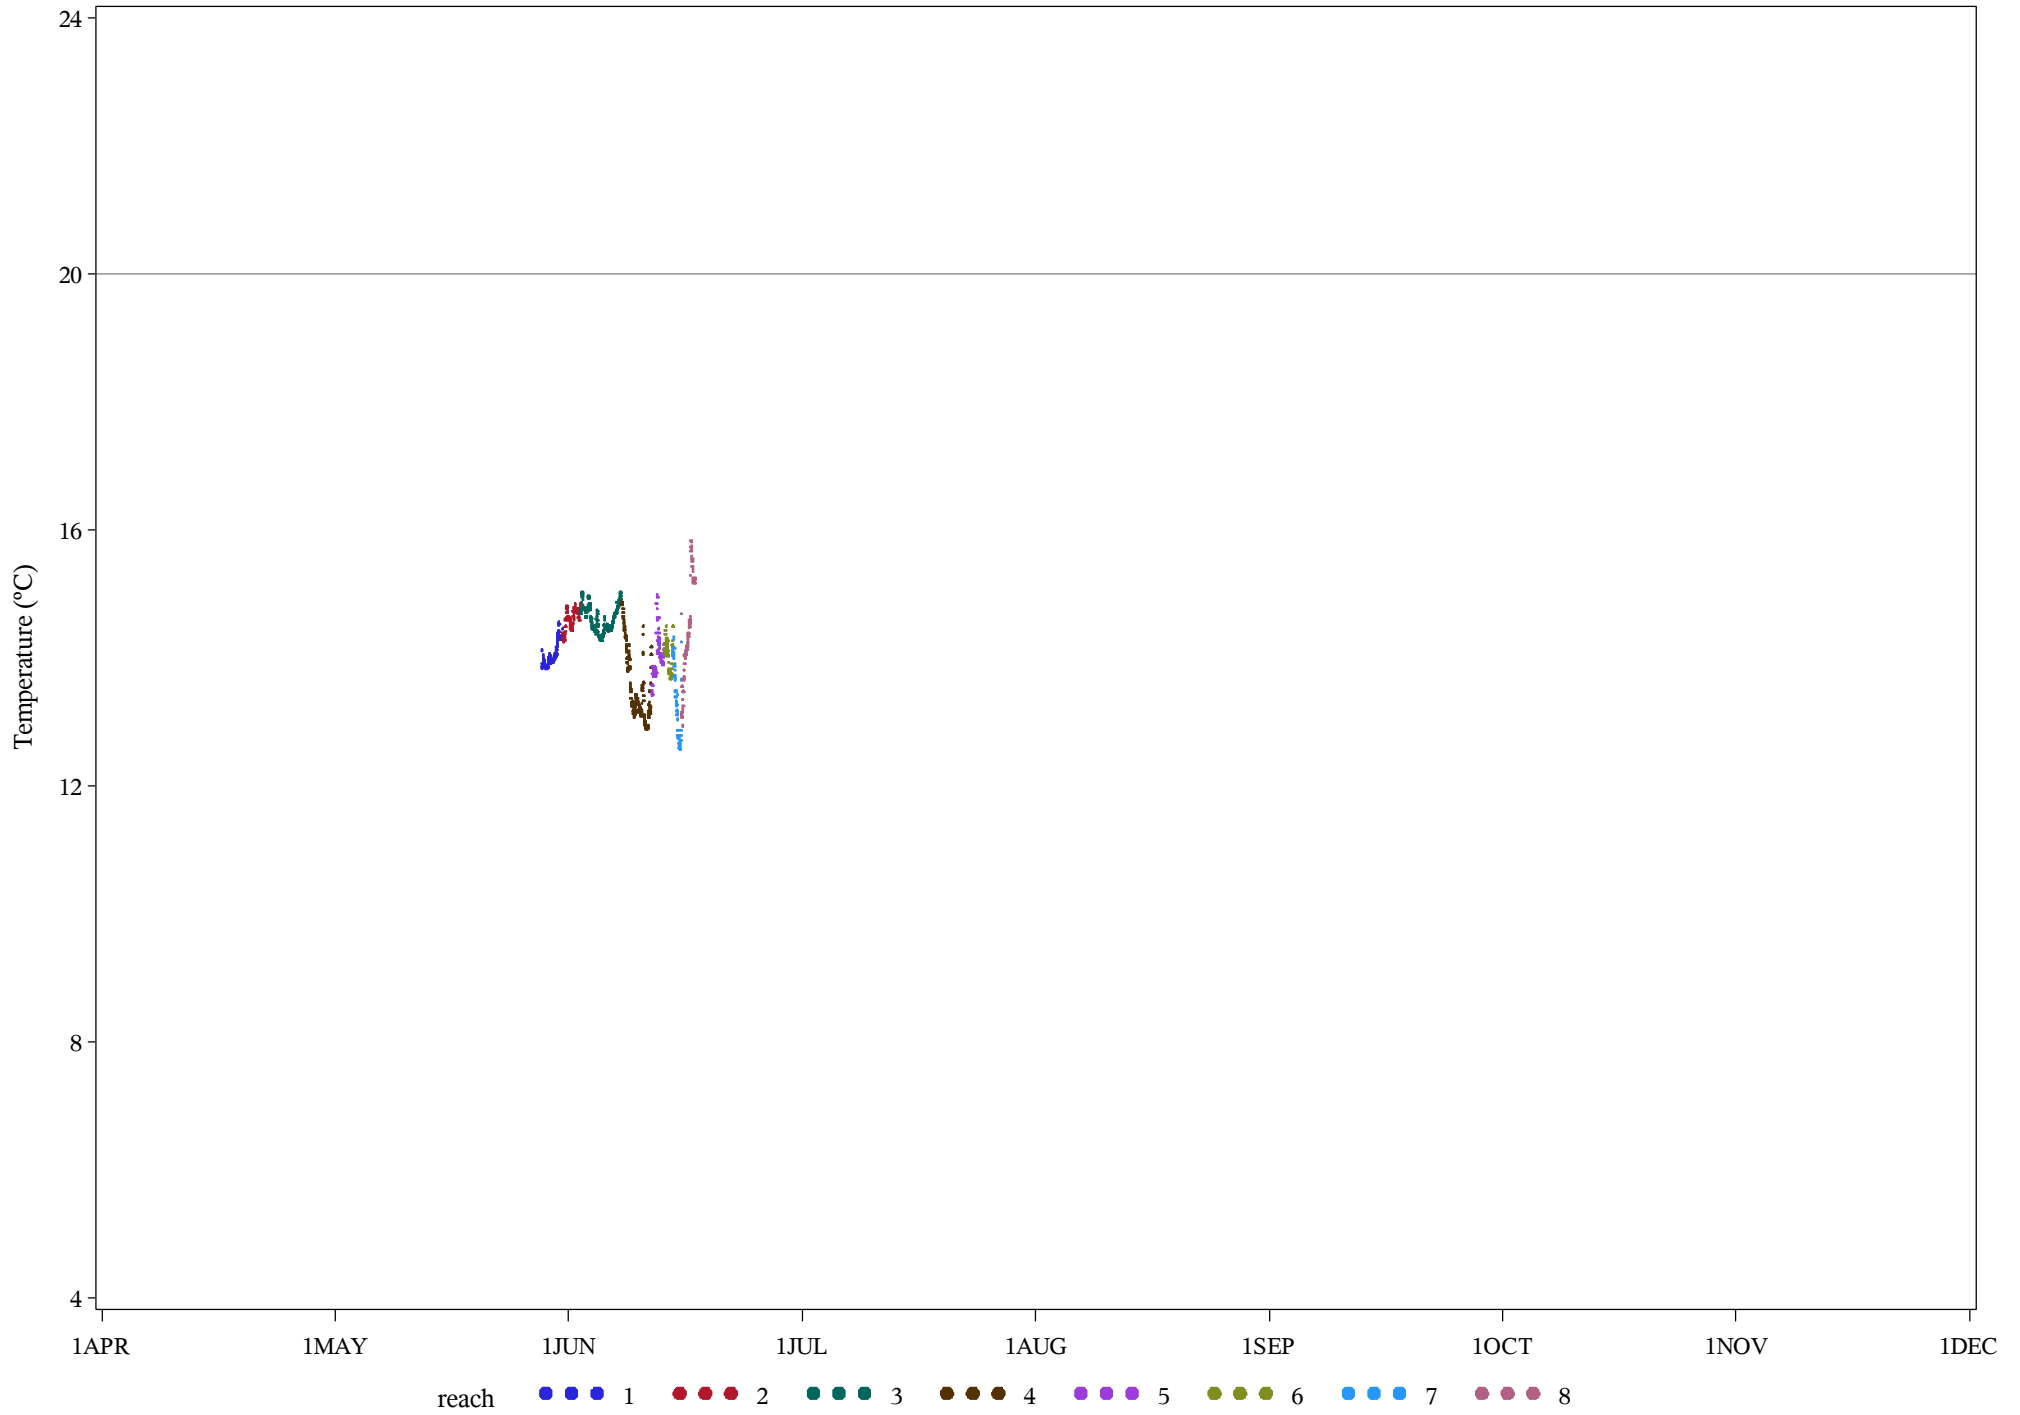



# Spring Chinook 4915A

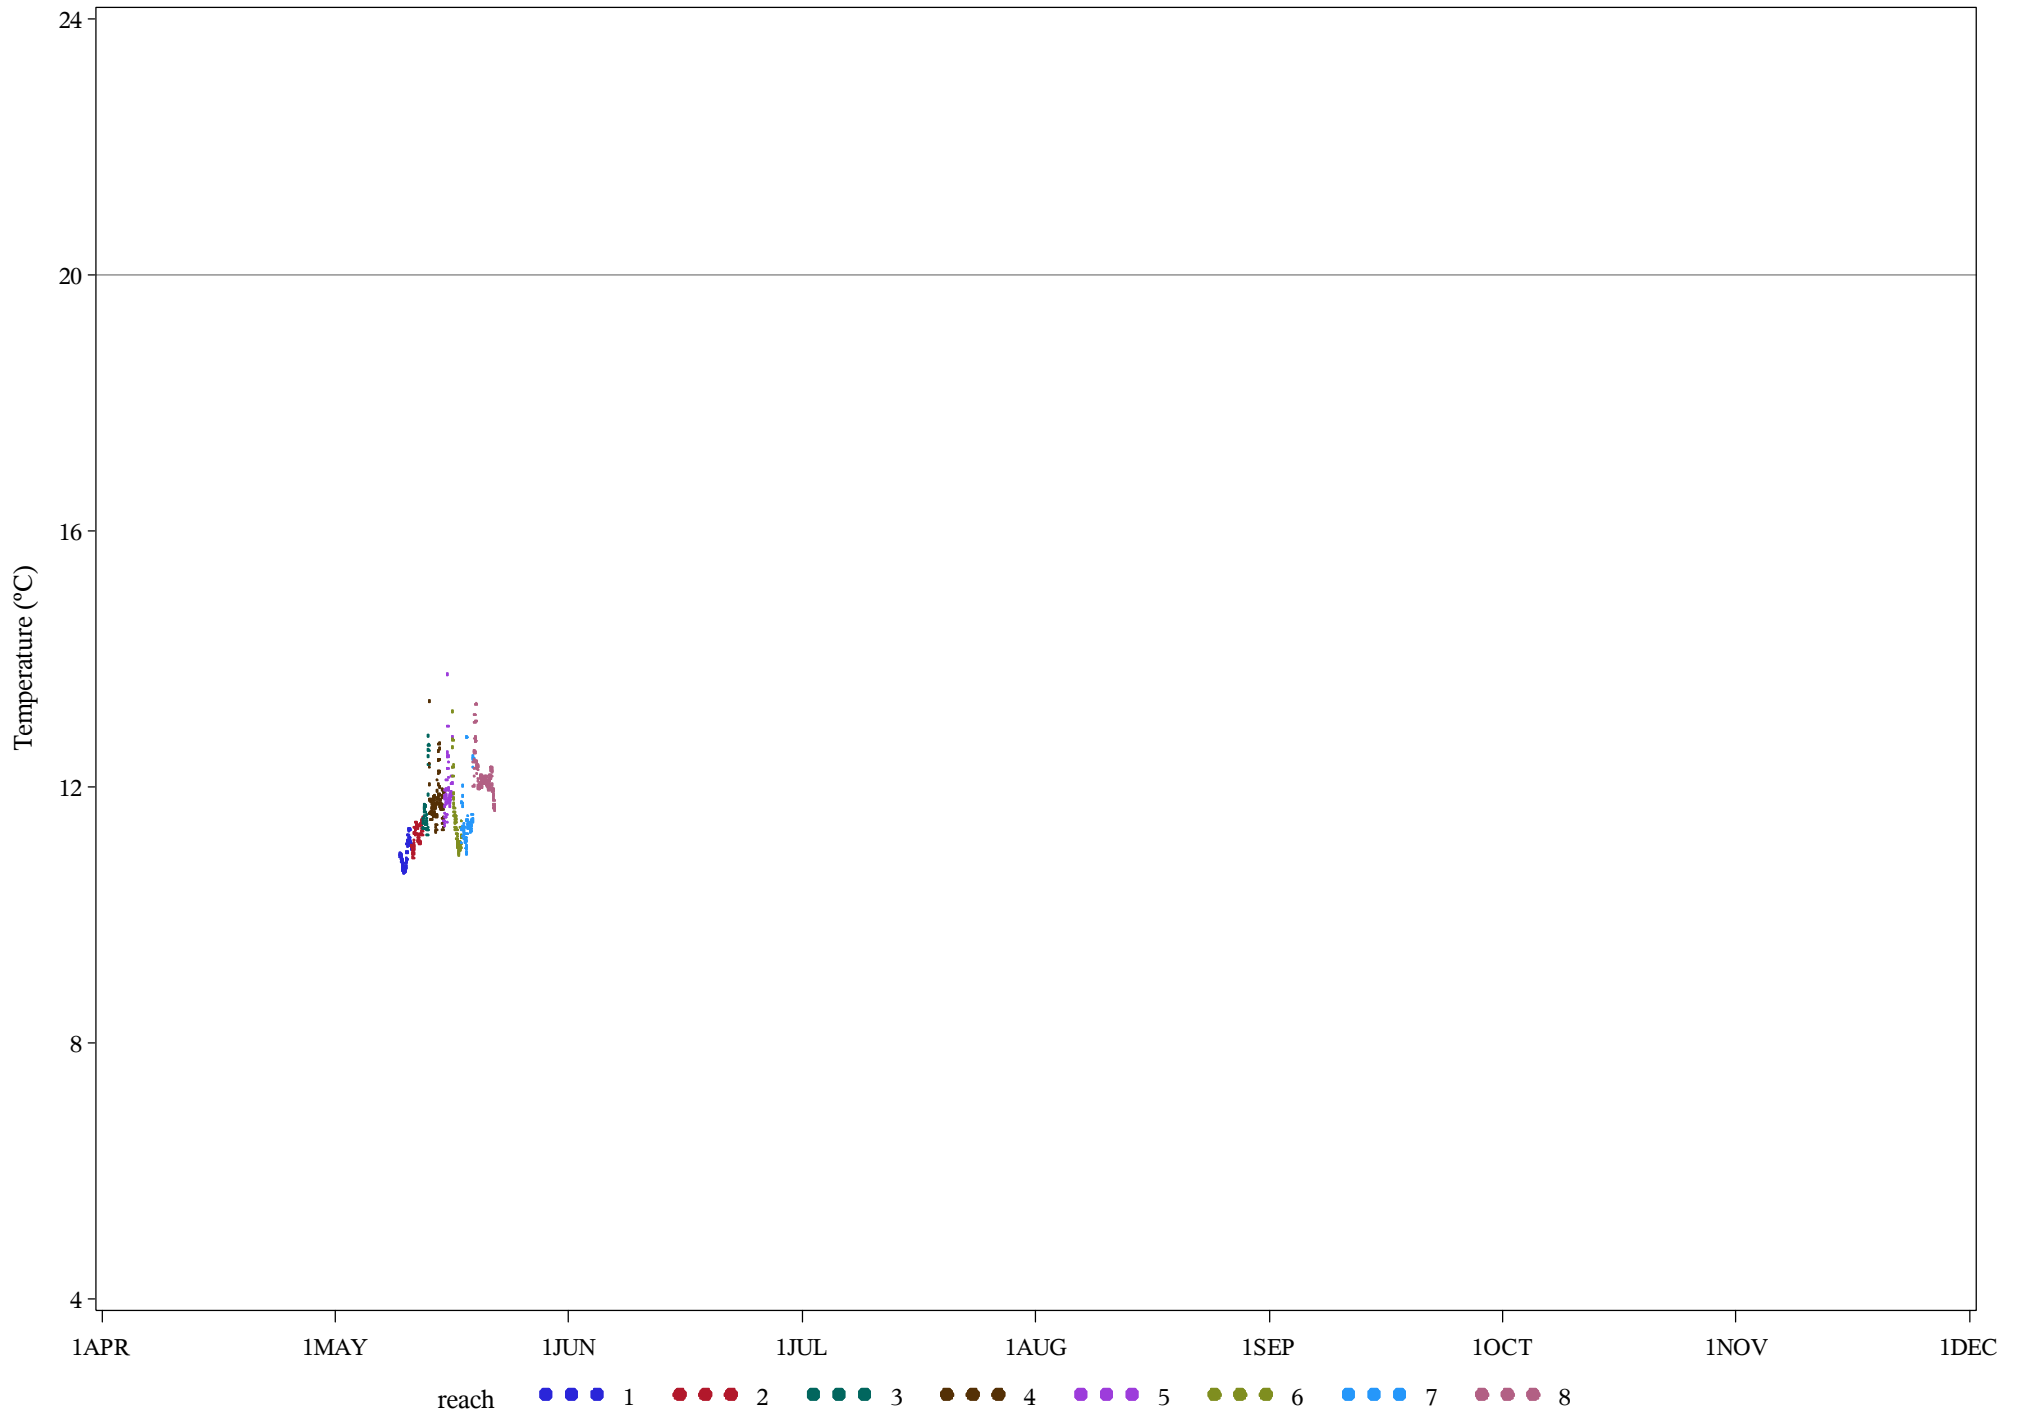



# Spring Chinook 4916A

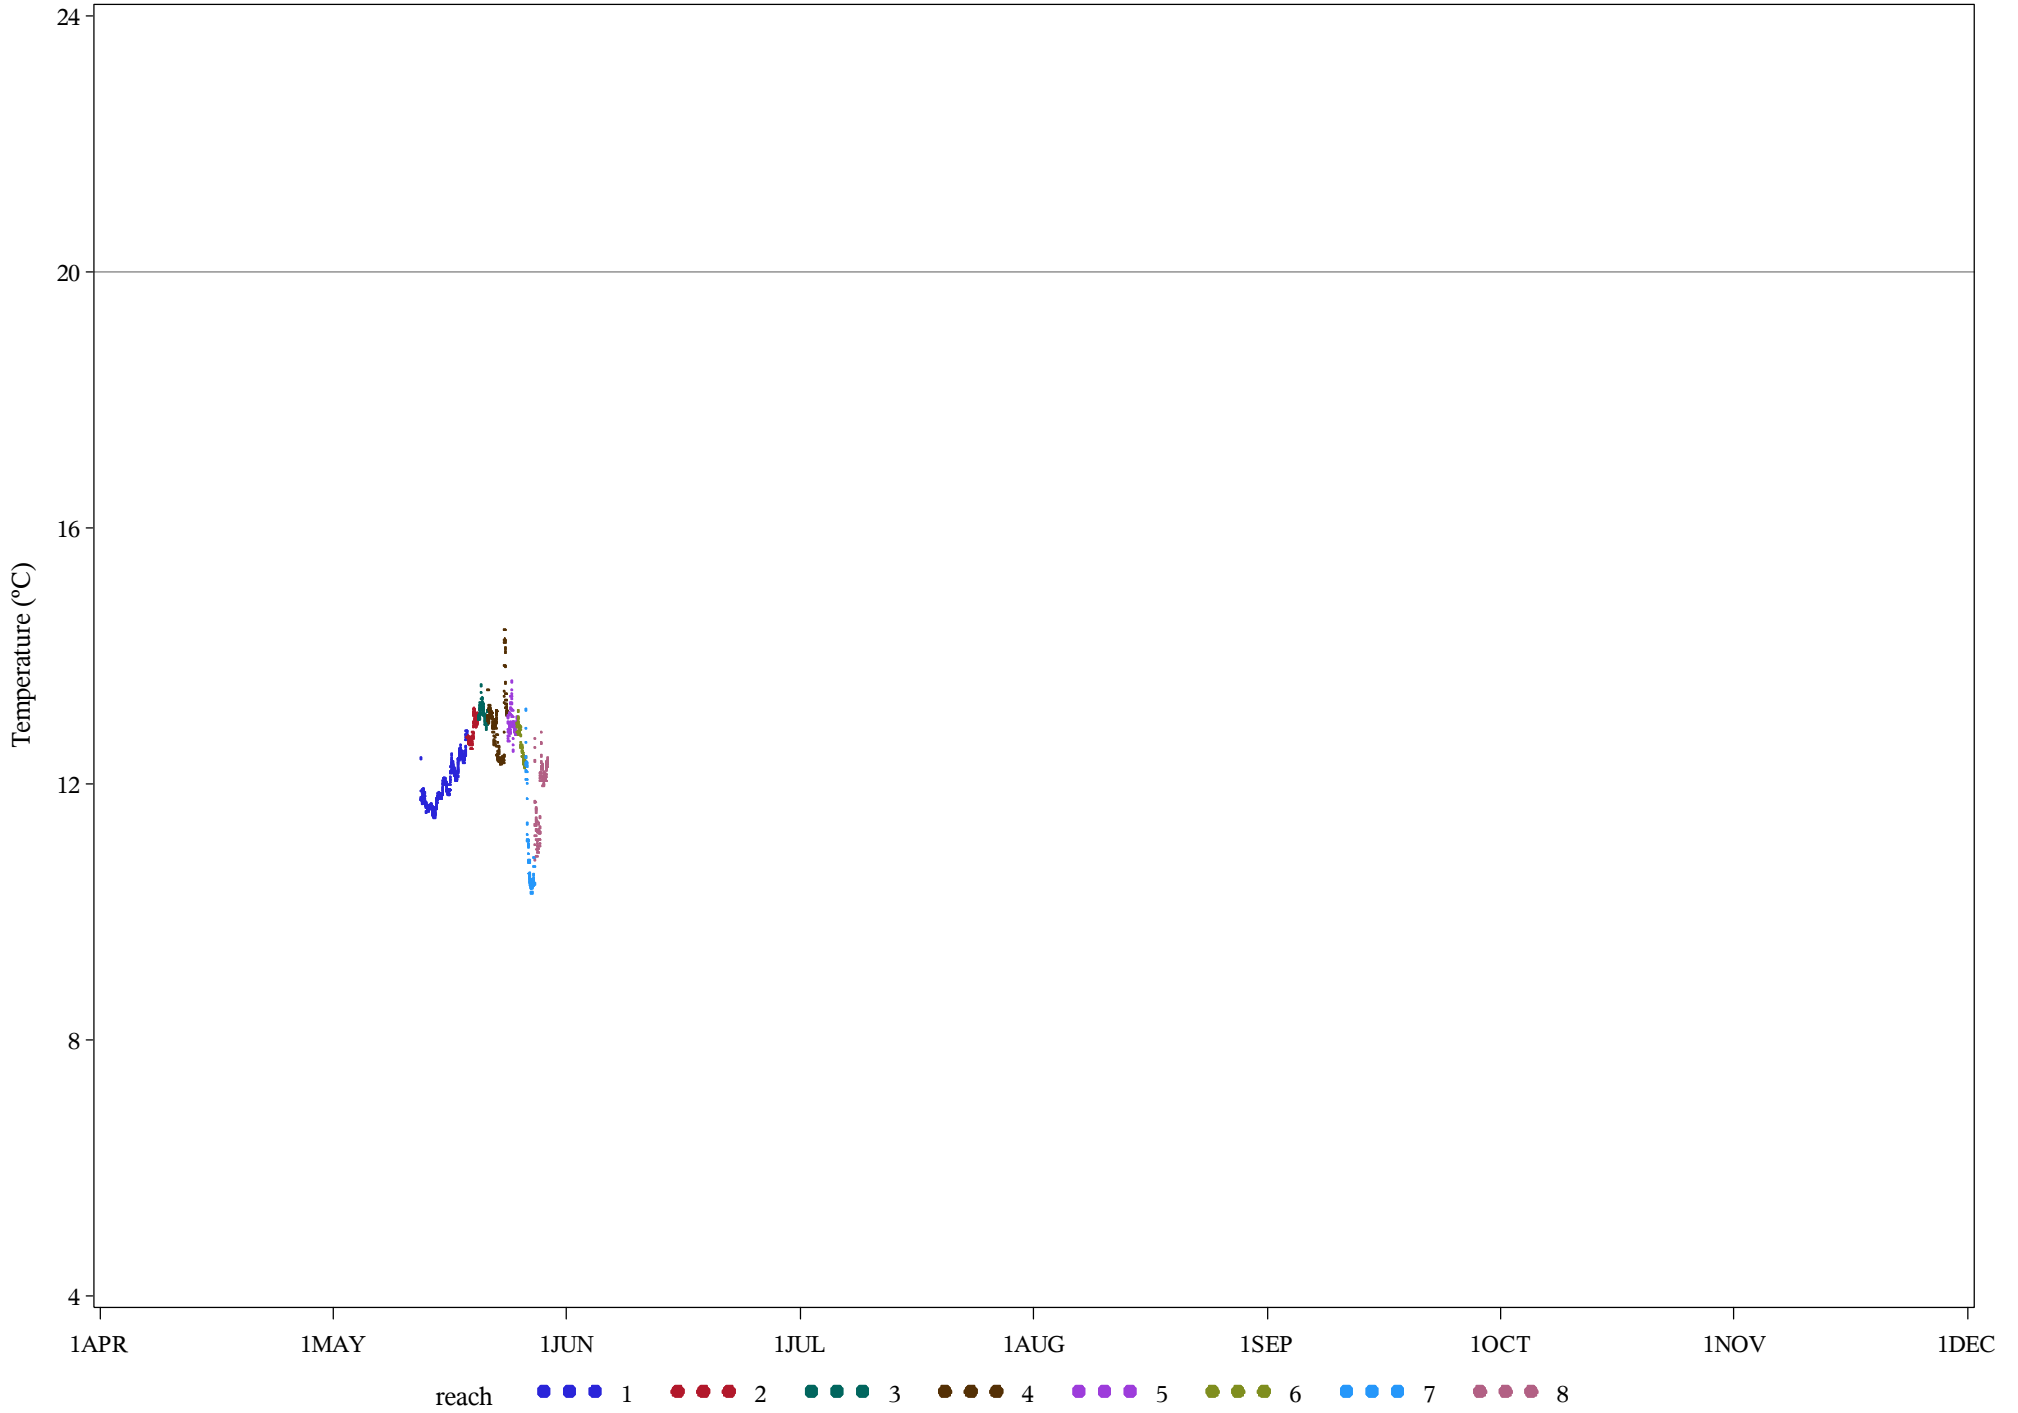

# Spring Chinook 4918A

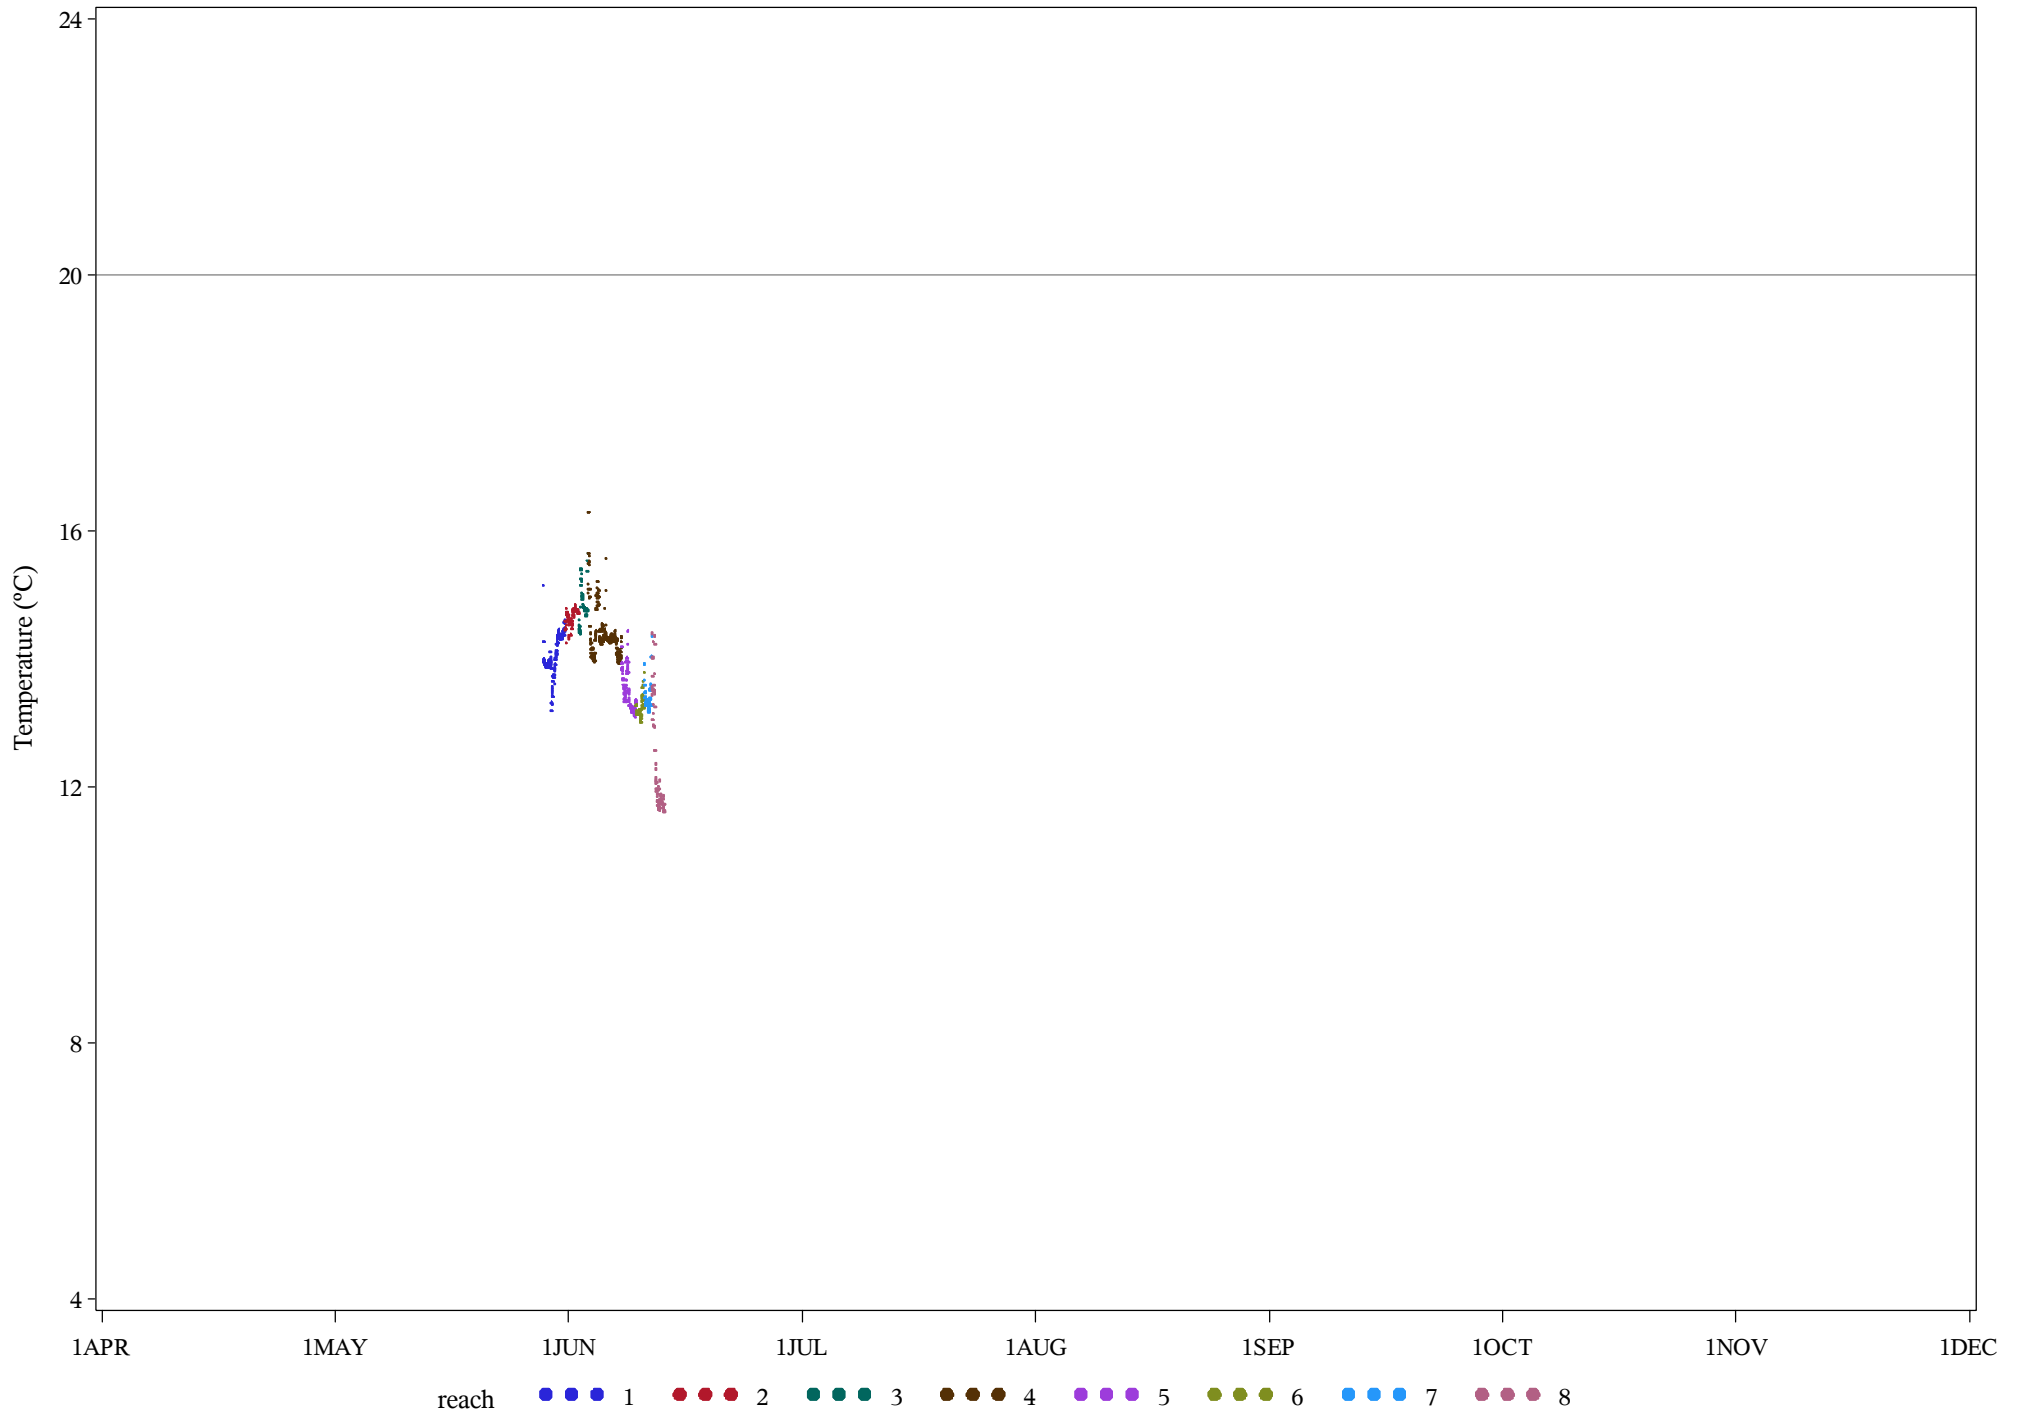

# Spring Chinook 4920A

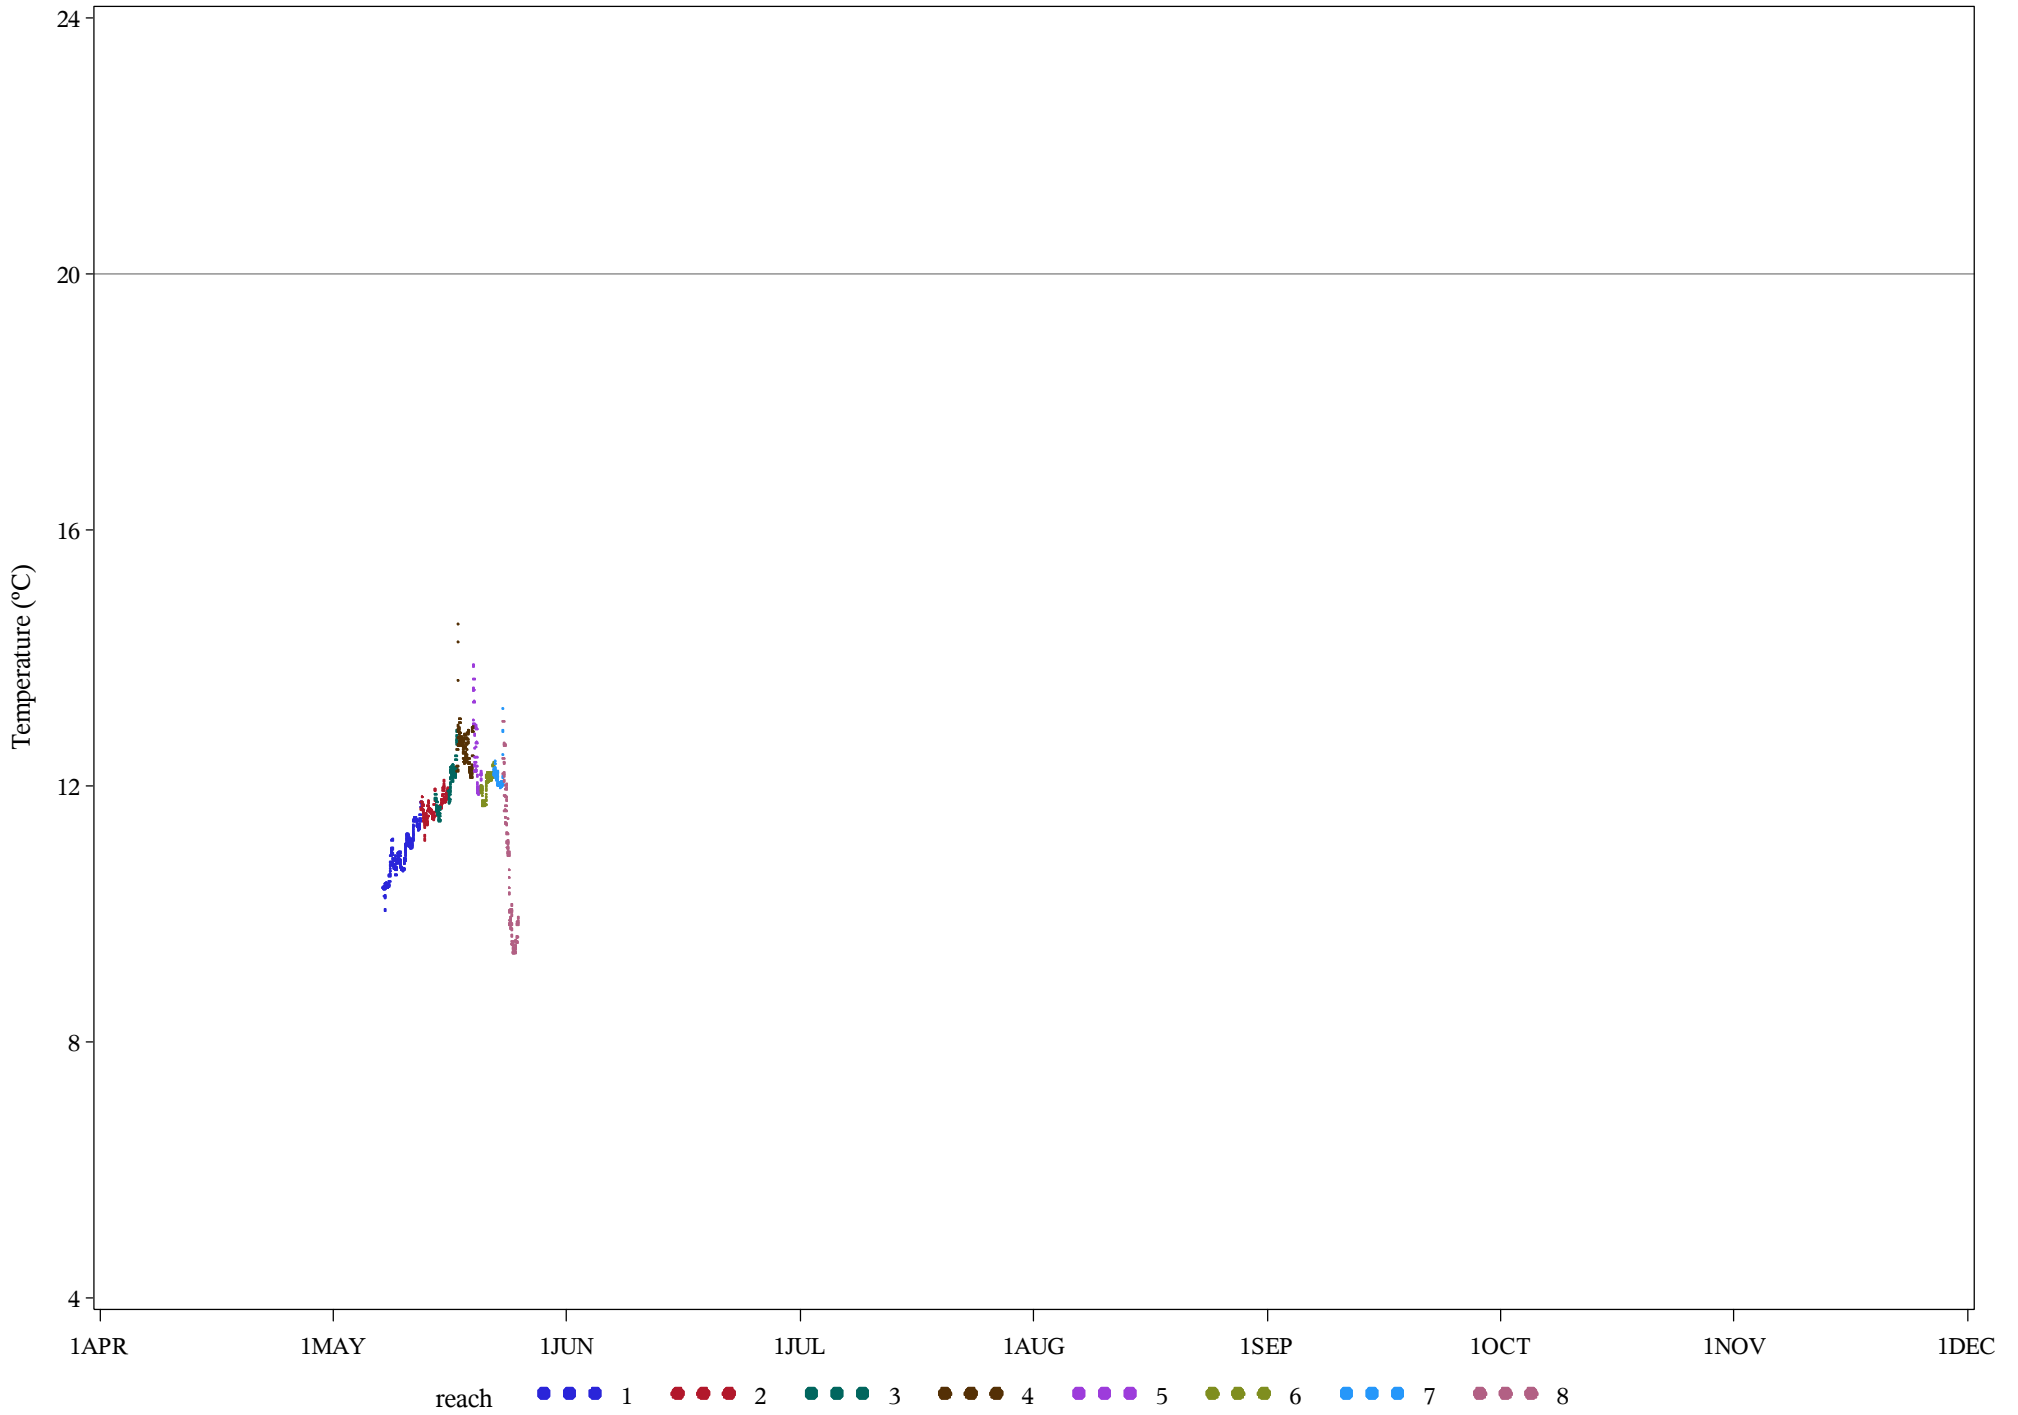

# Spring Chinook 4923A

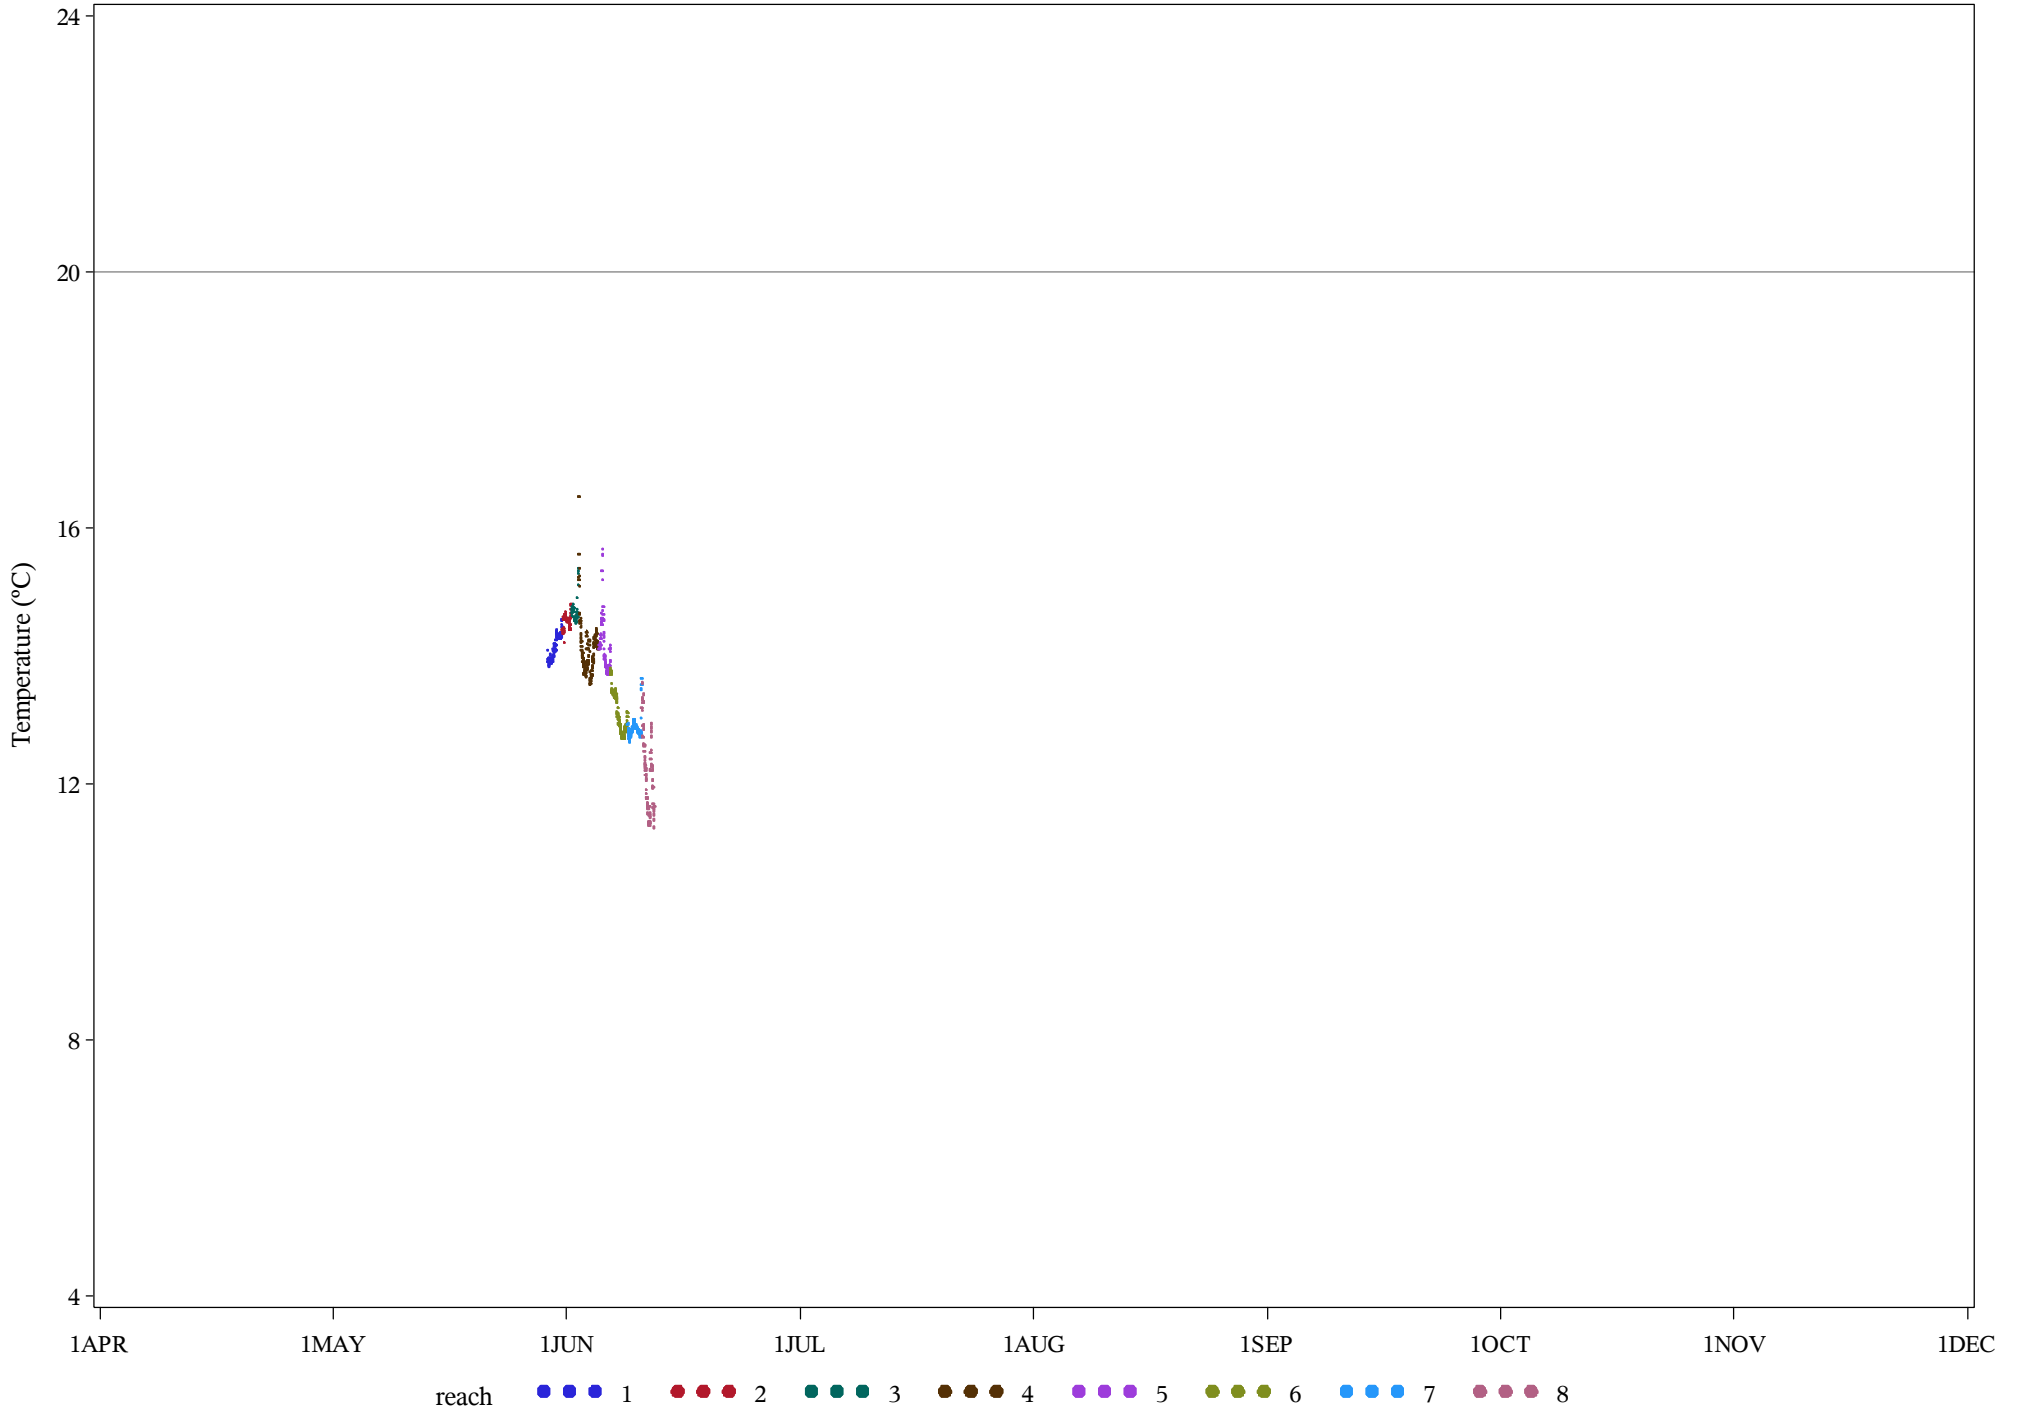

# Spring Chinook 4924A

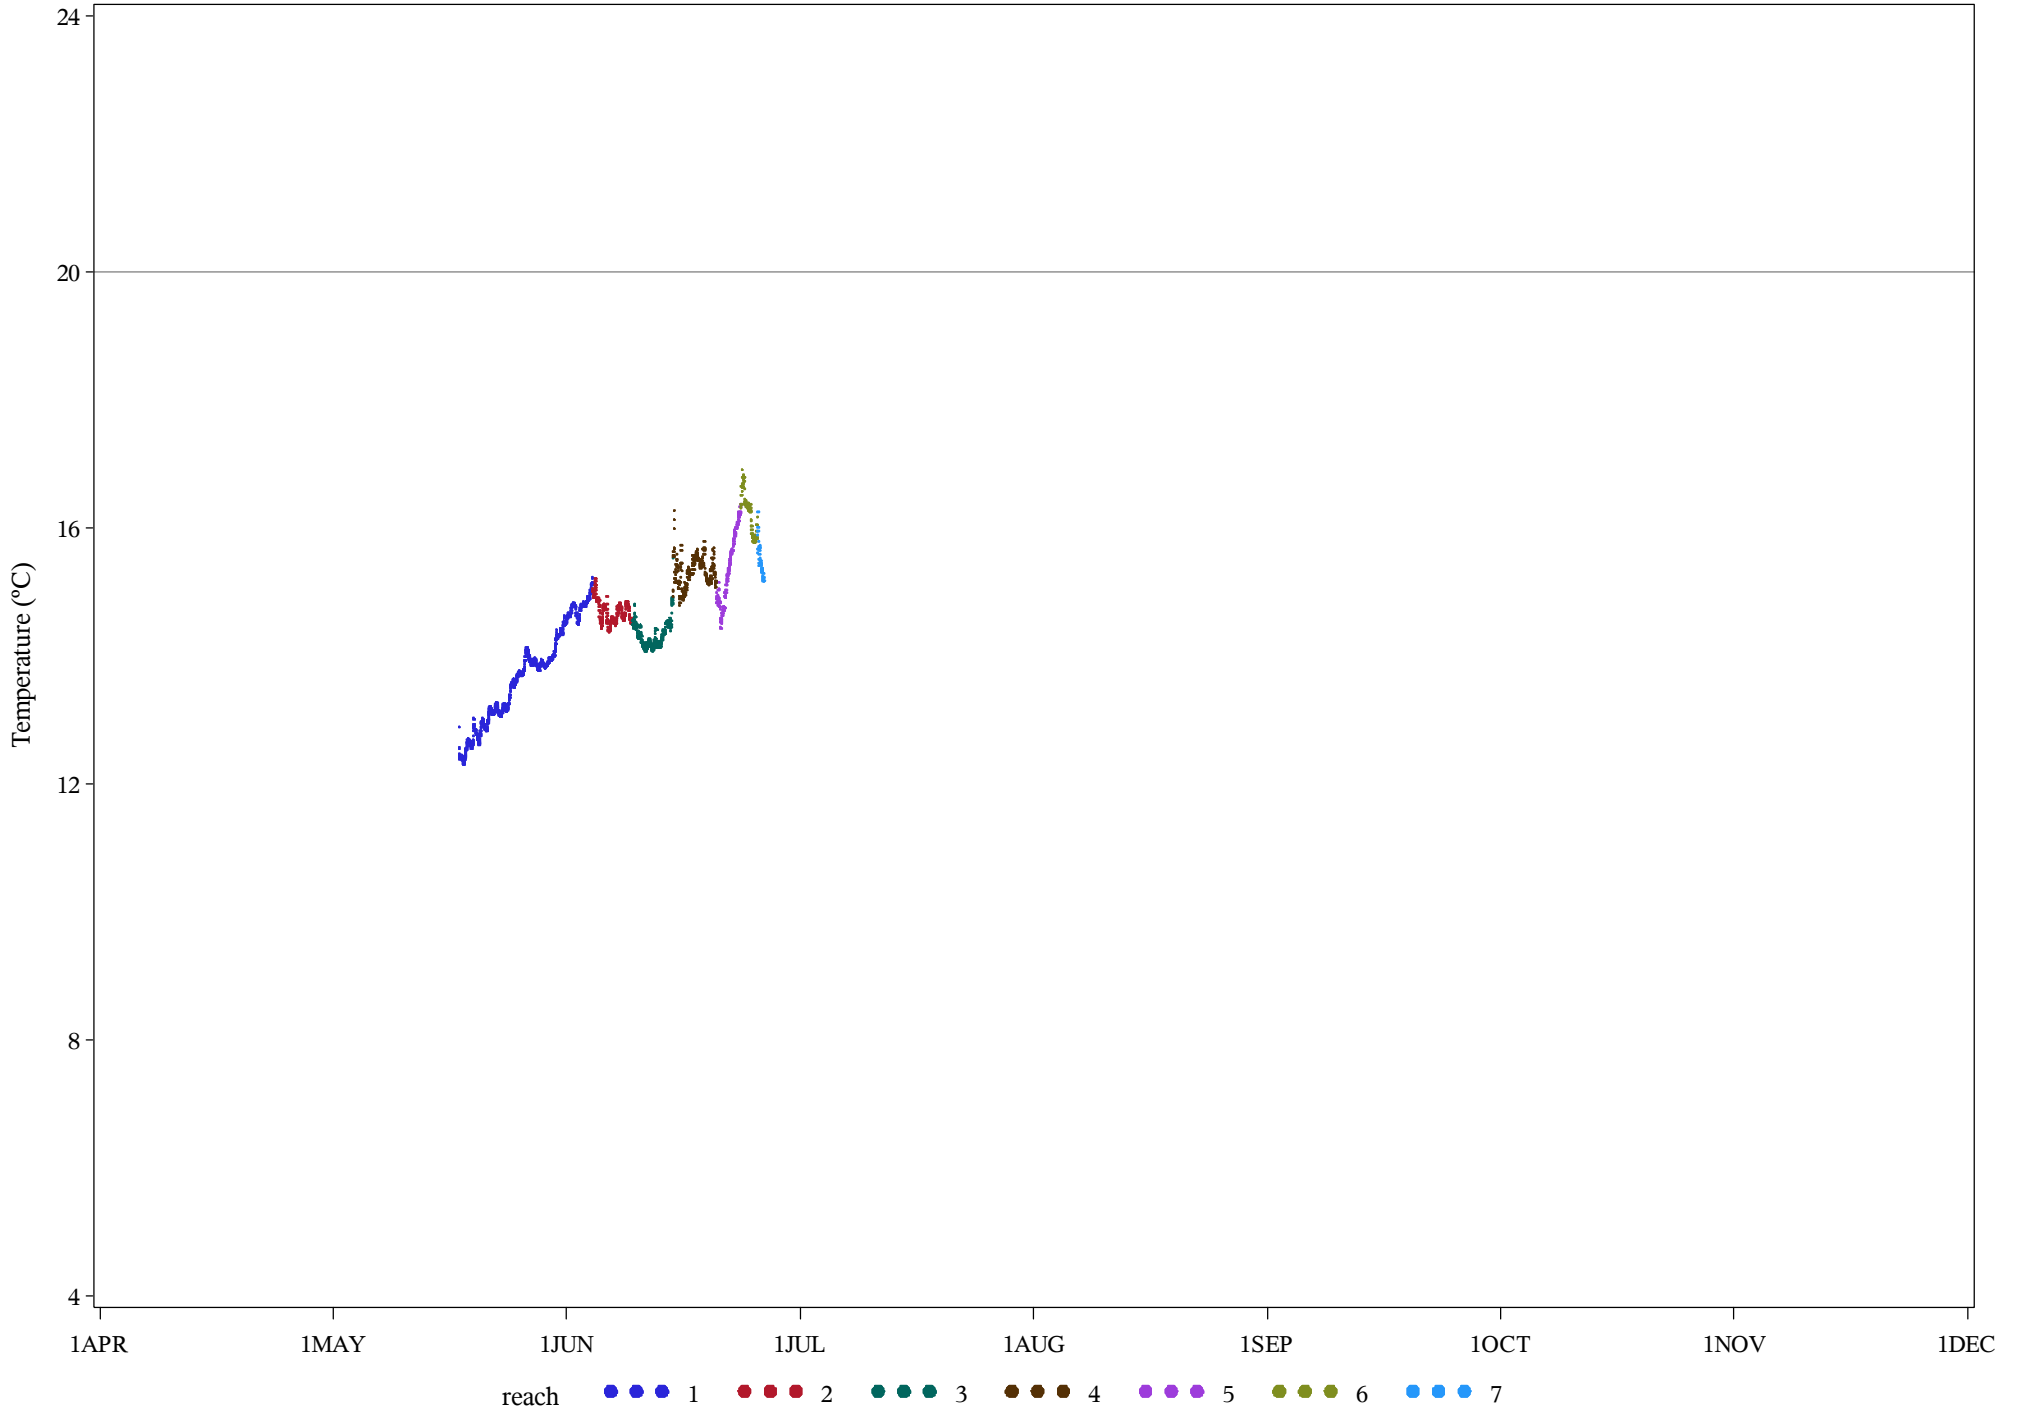



Steelhead  
2642B

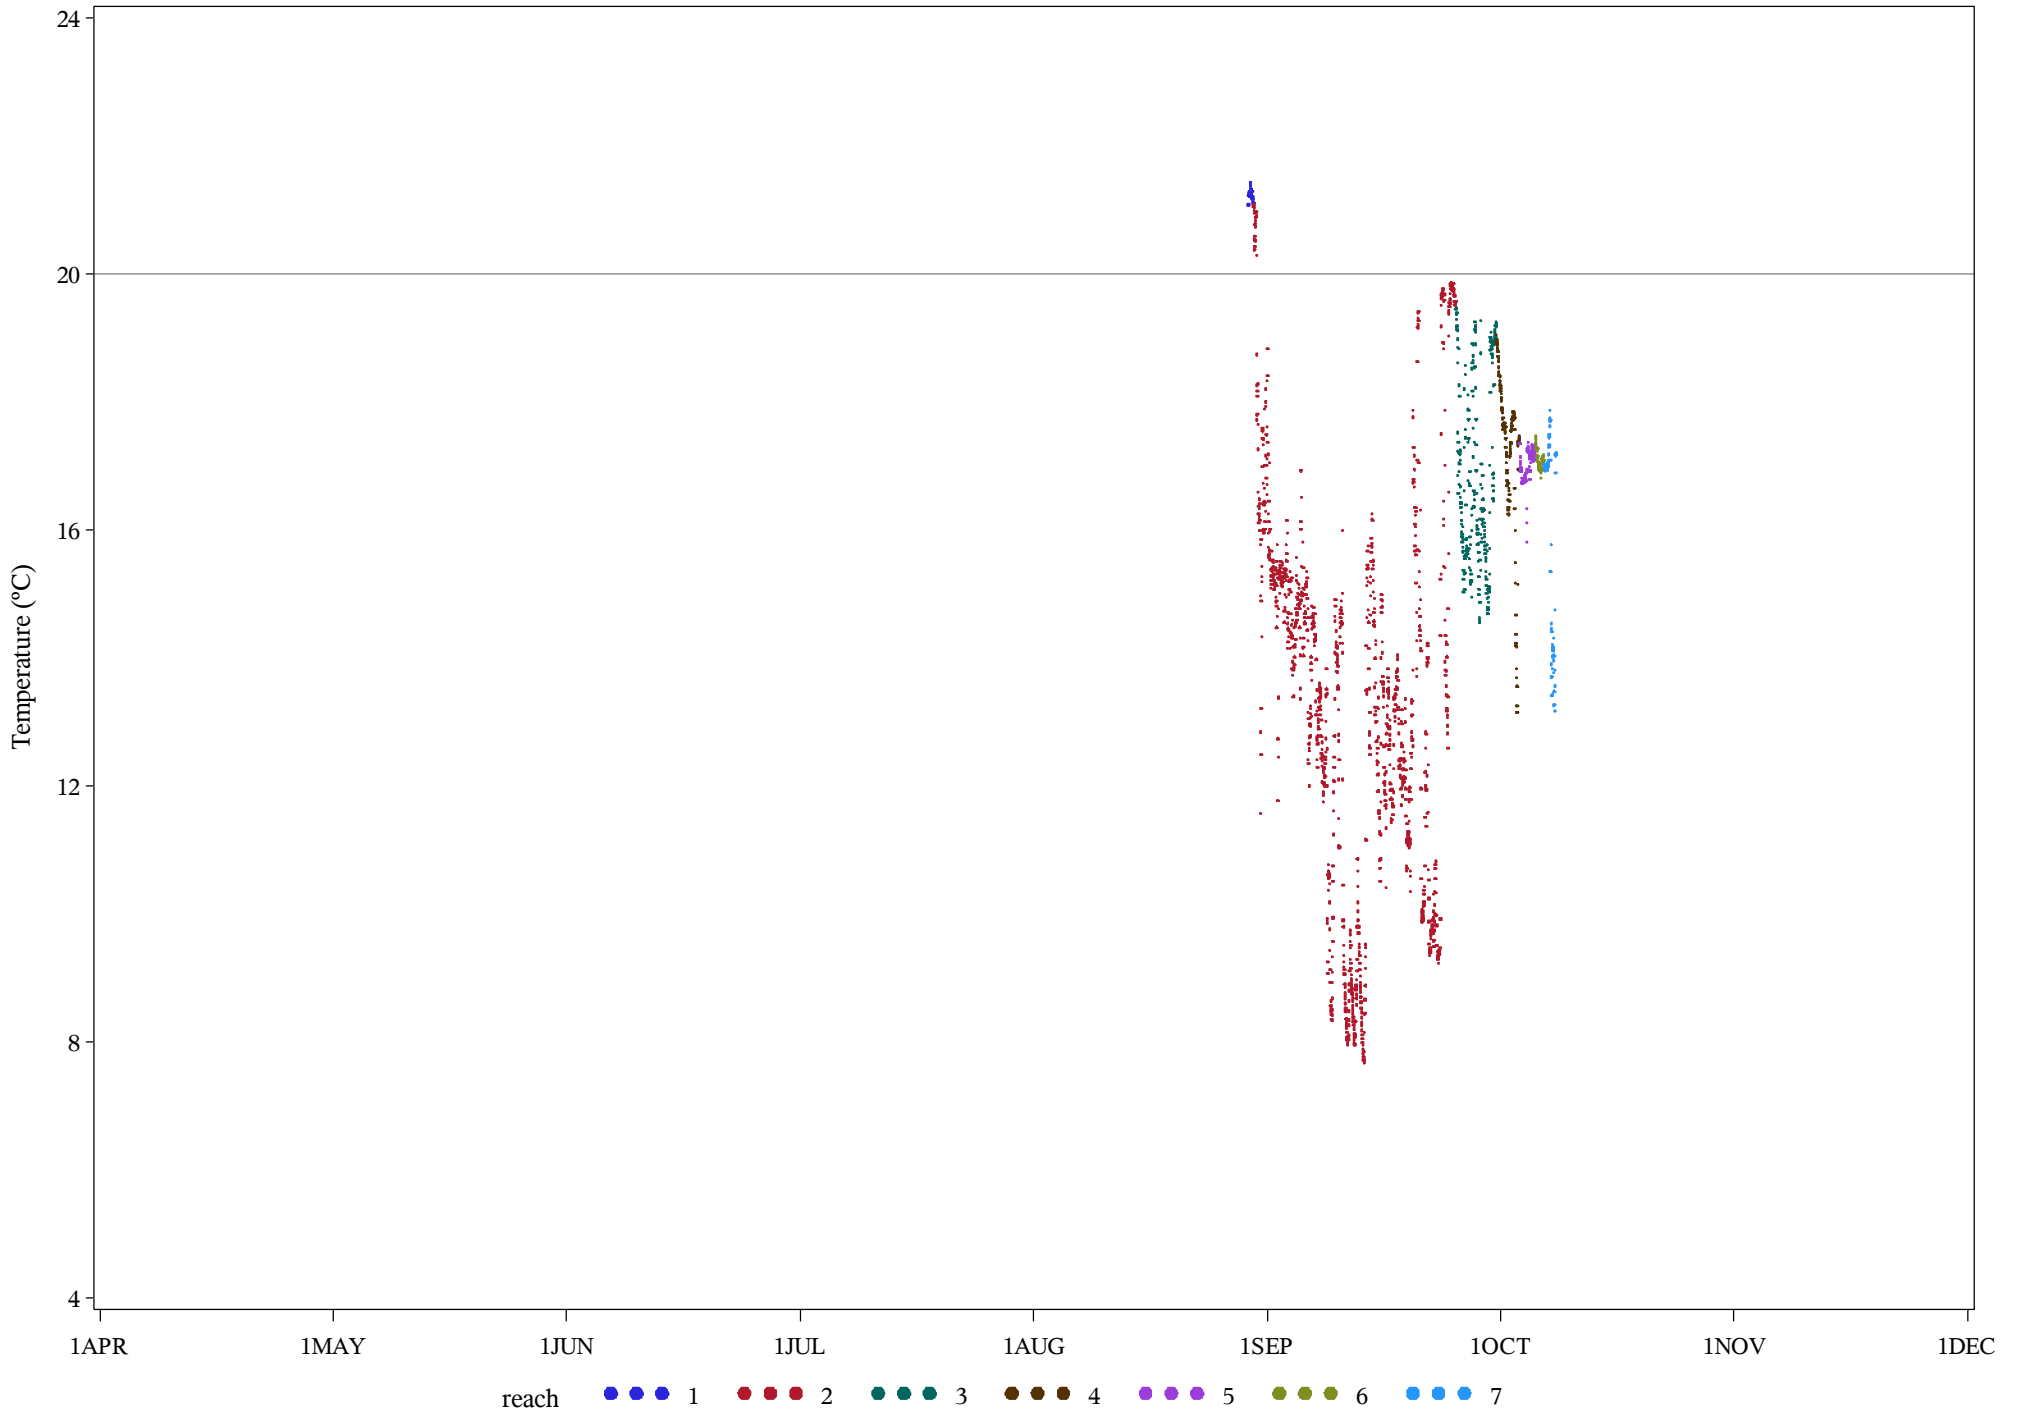

Steelhead  
2762B

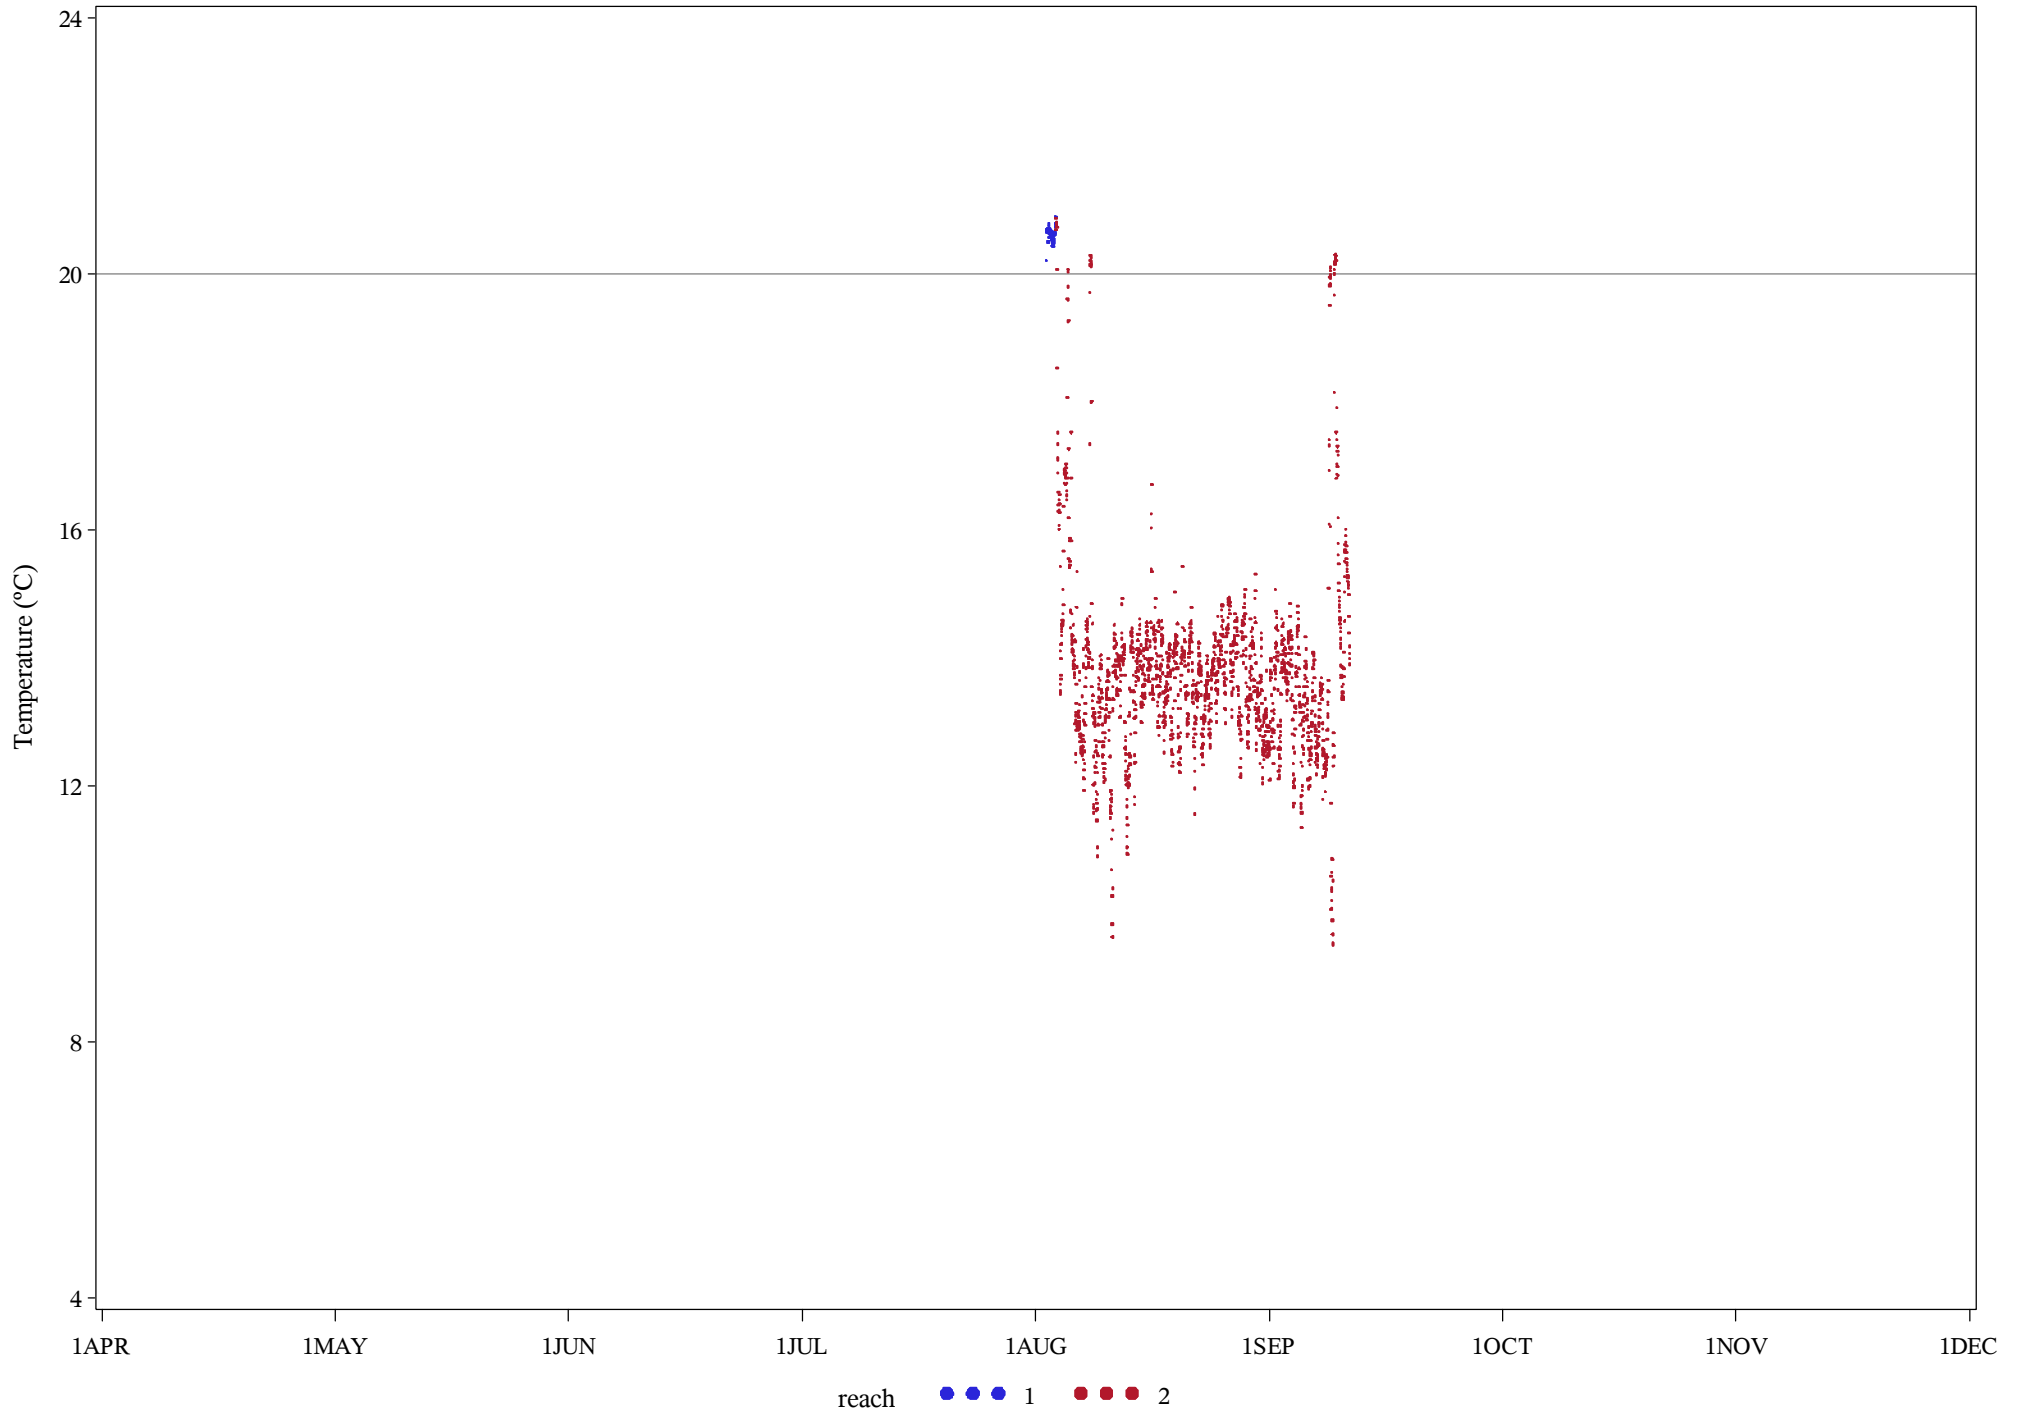



Steelhead  
2806B

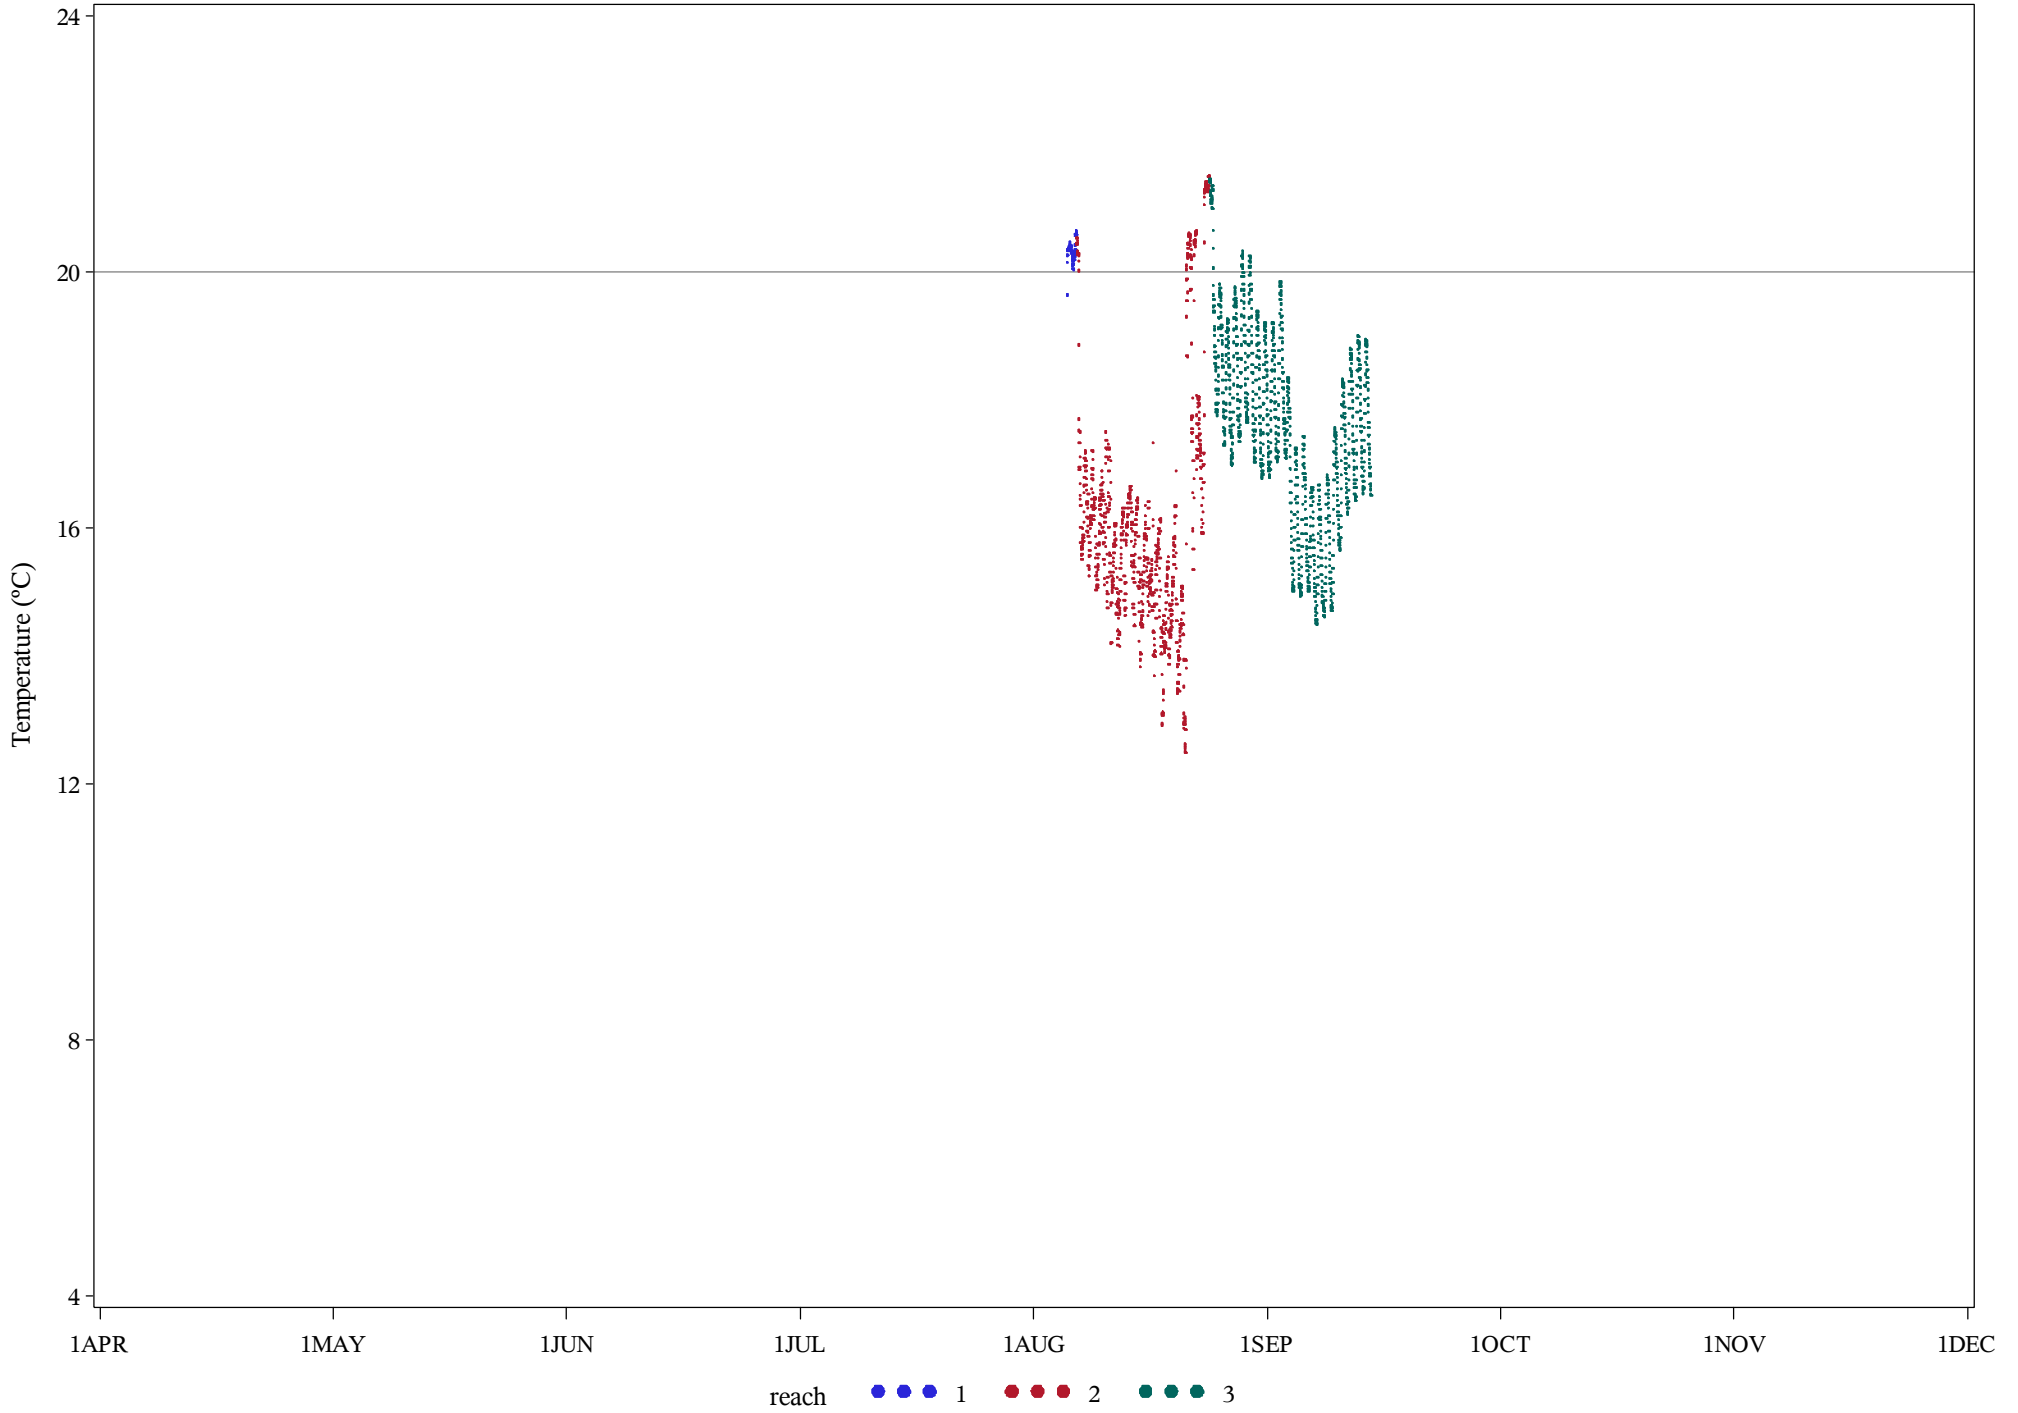

# Steelhead 2987B

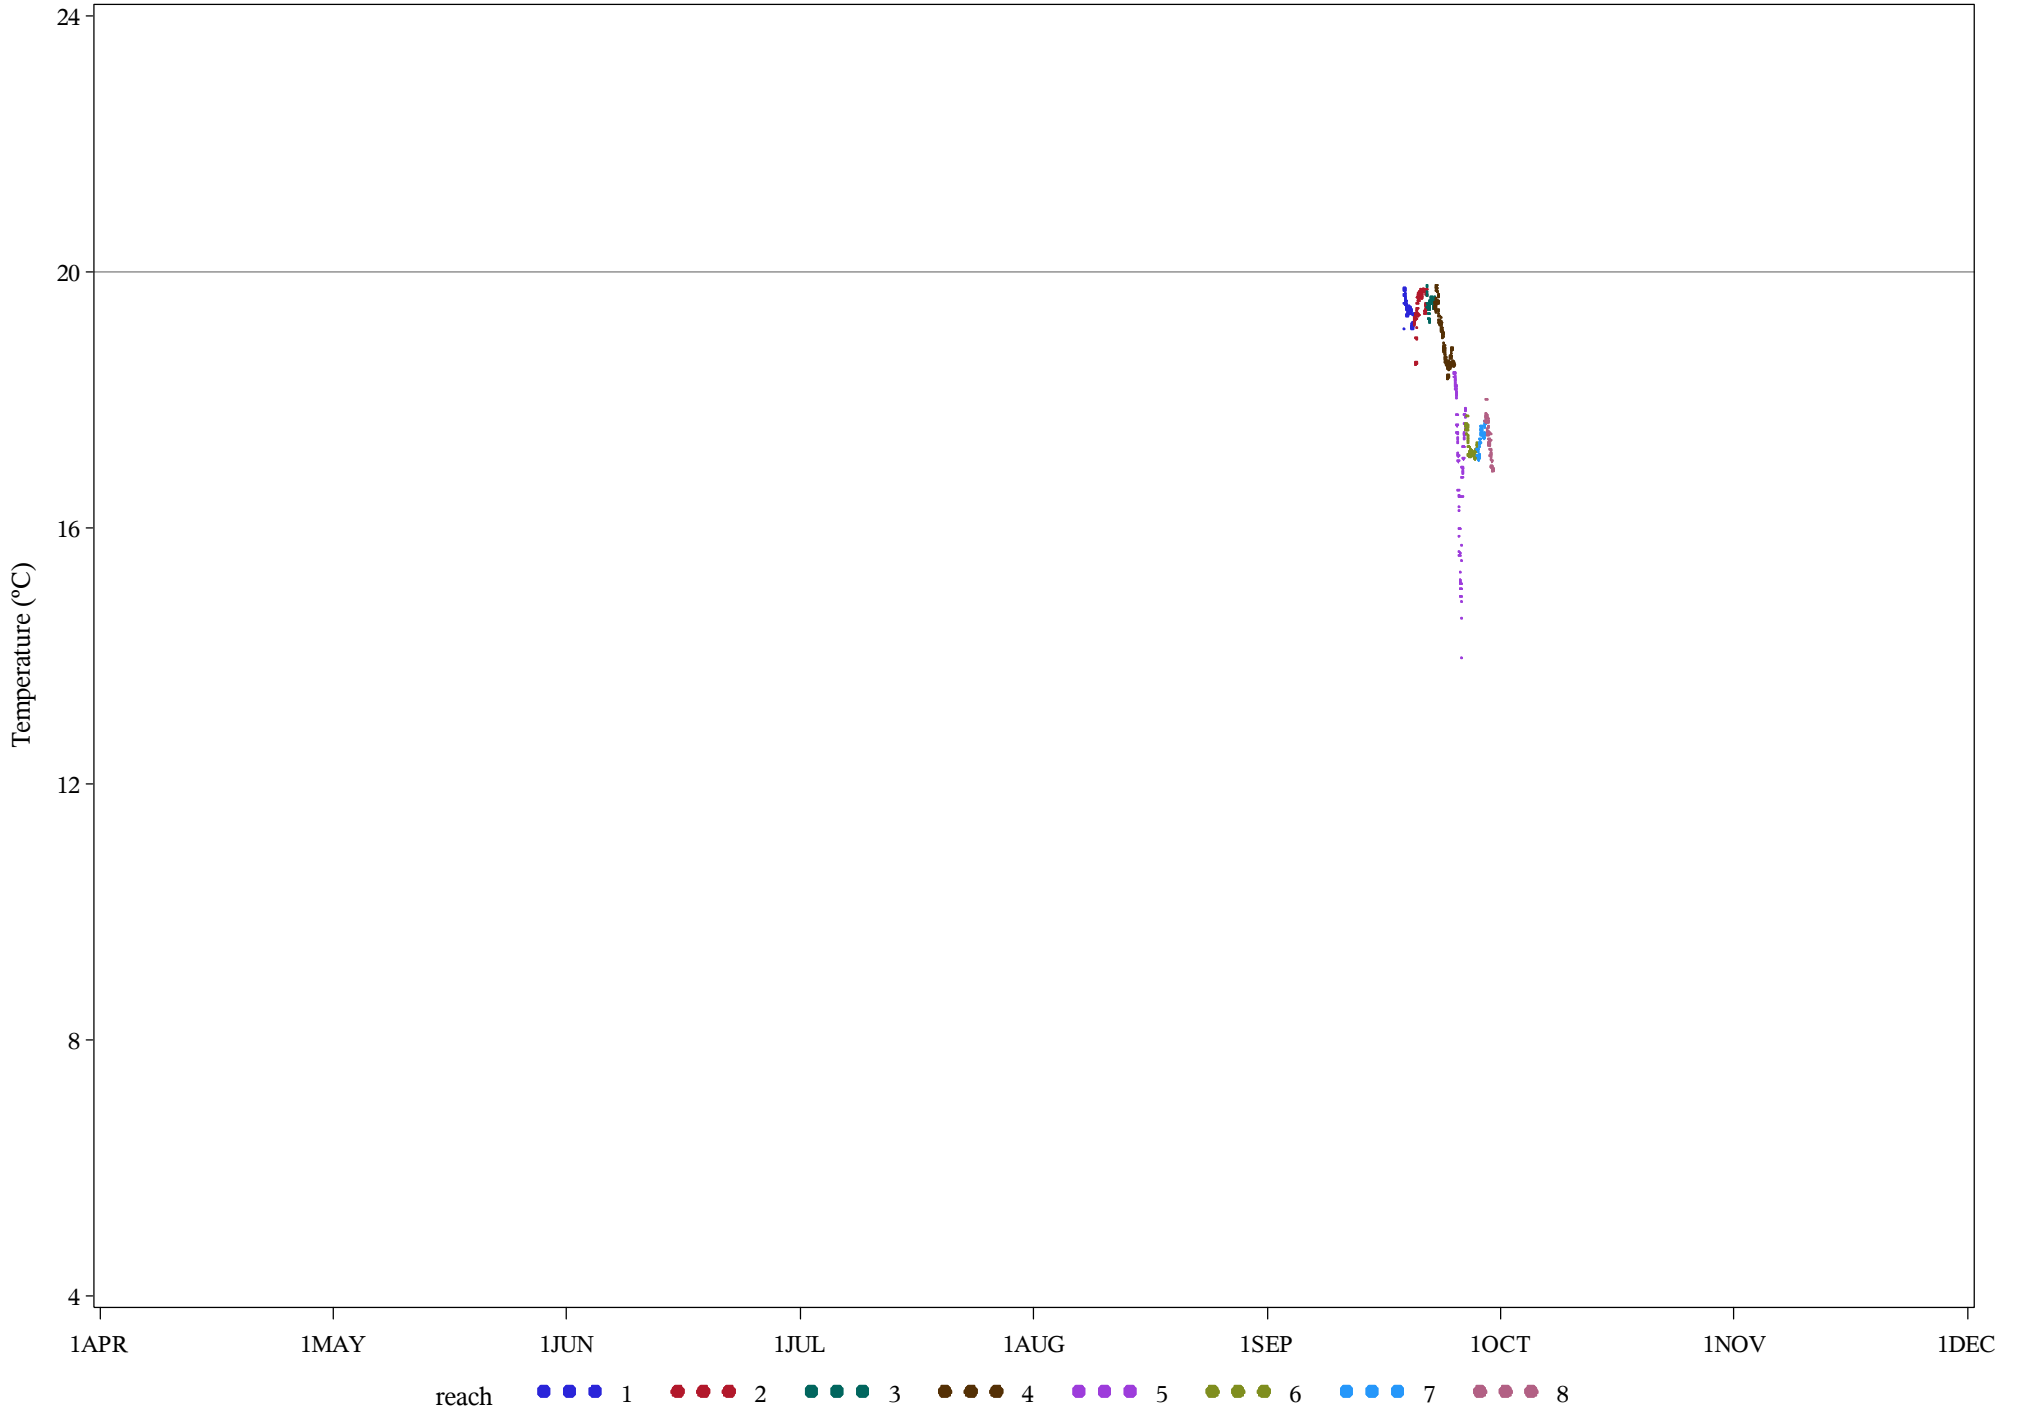

# Steelhead 3002A

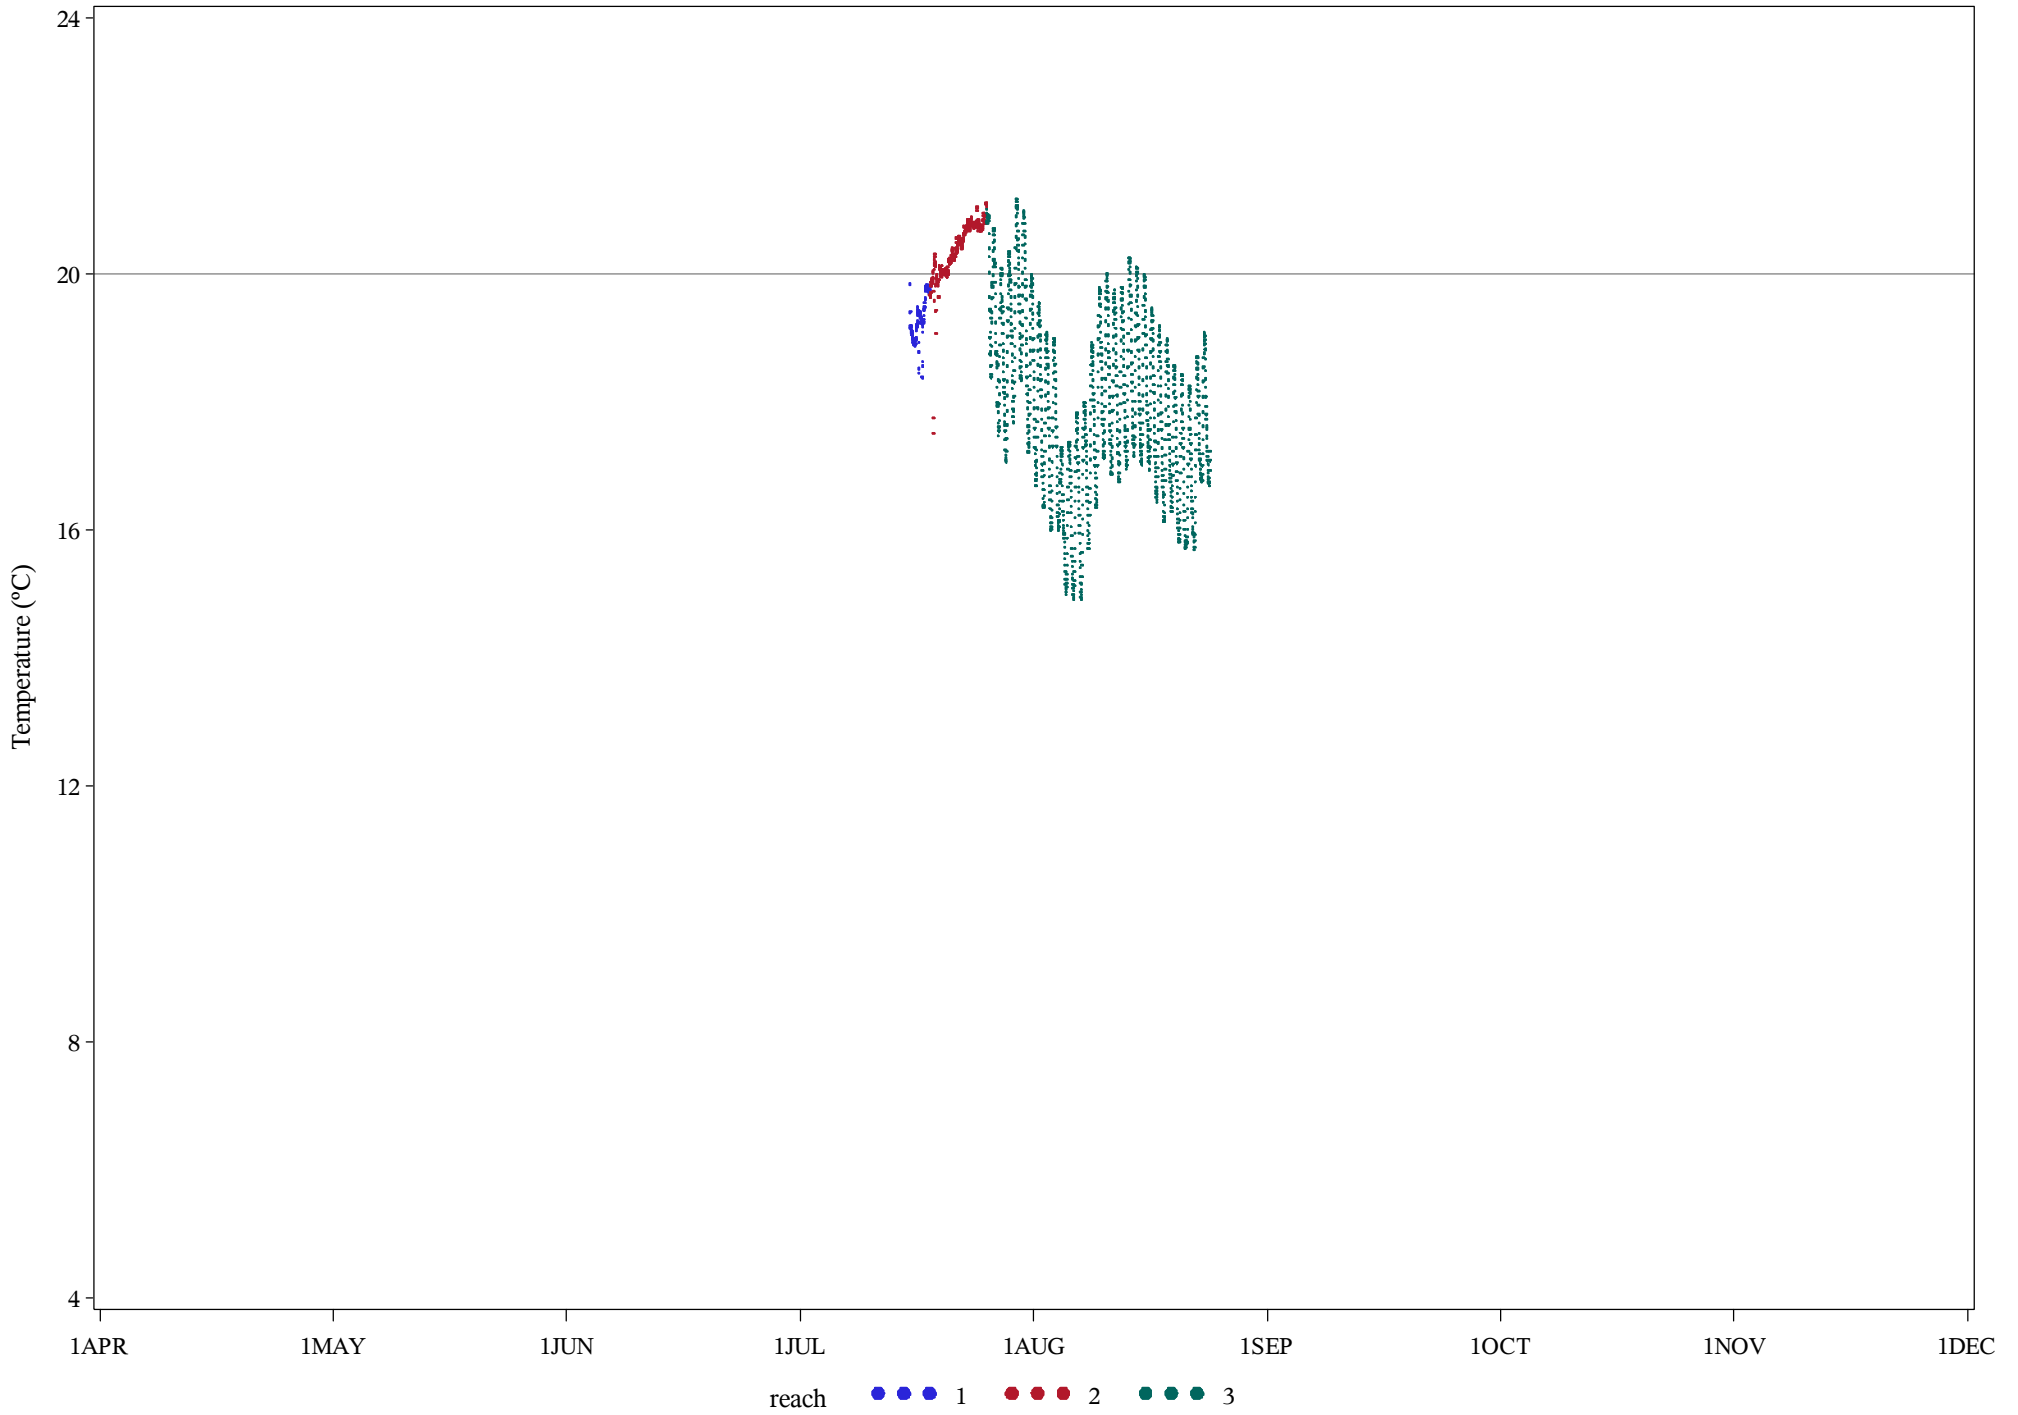

# Steelhead 3005B

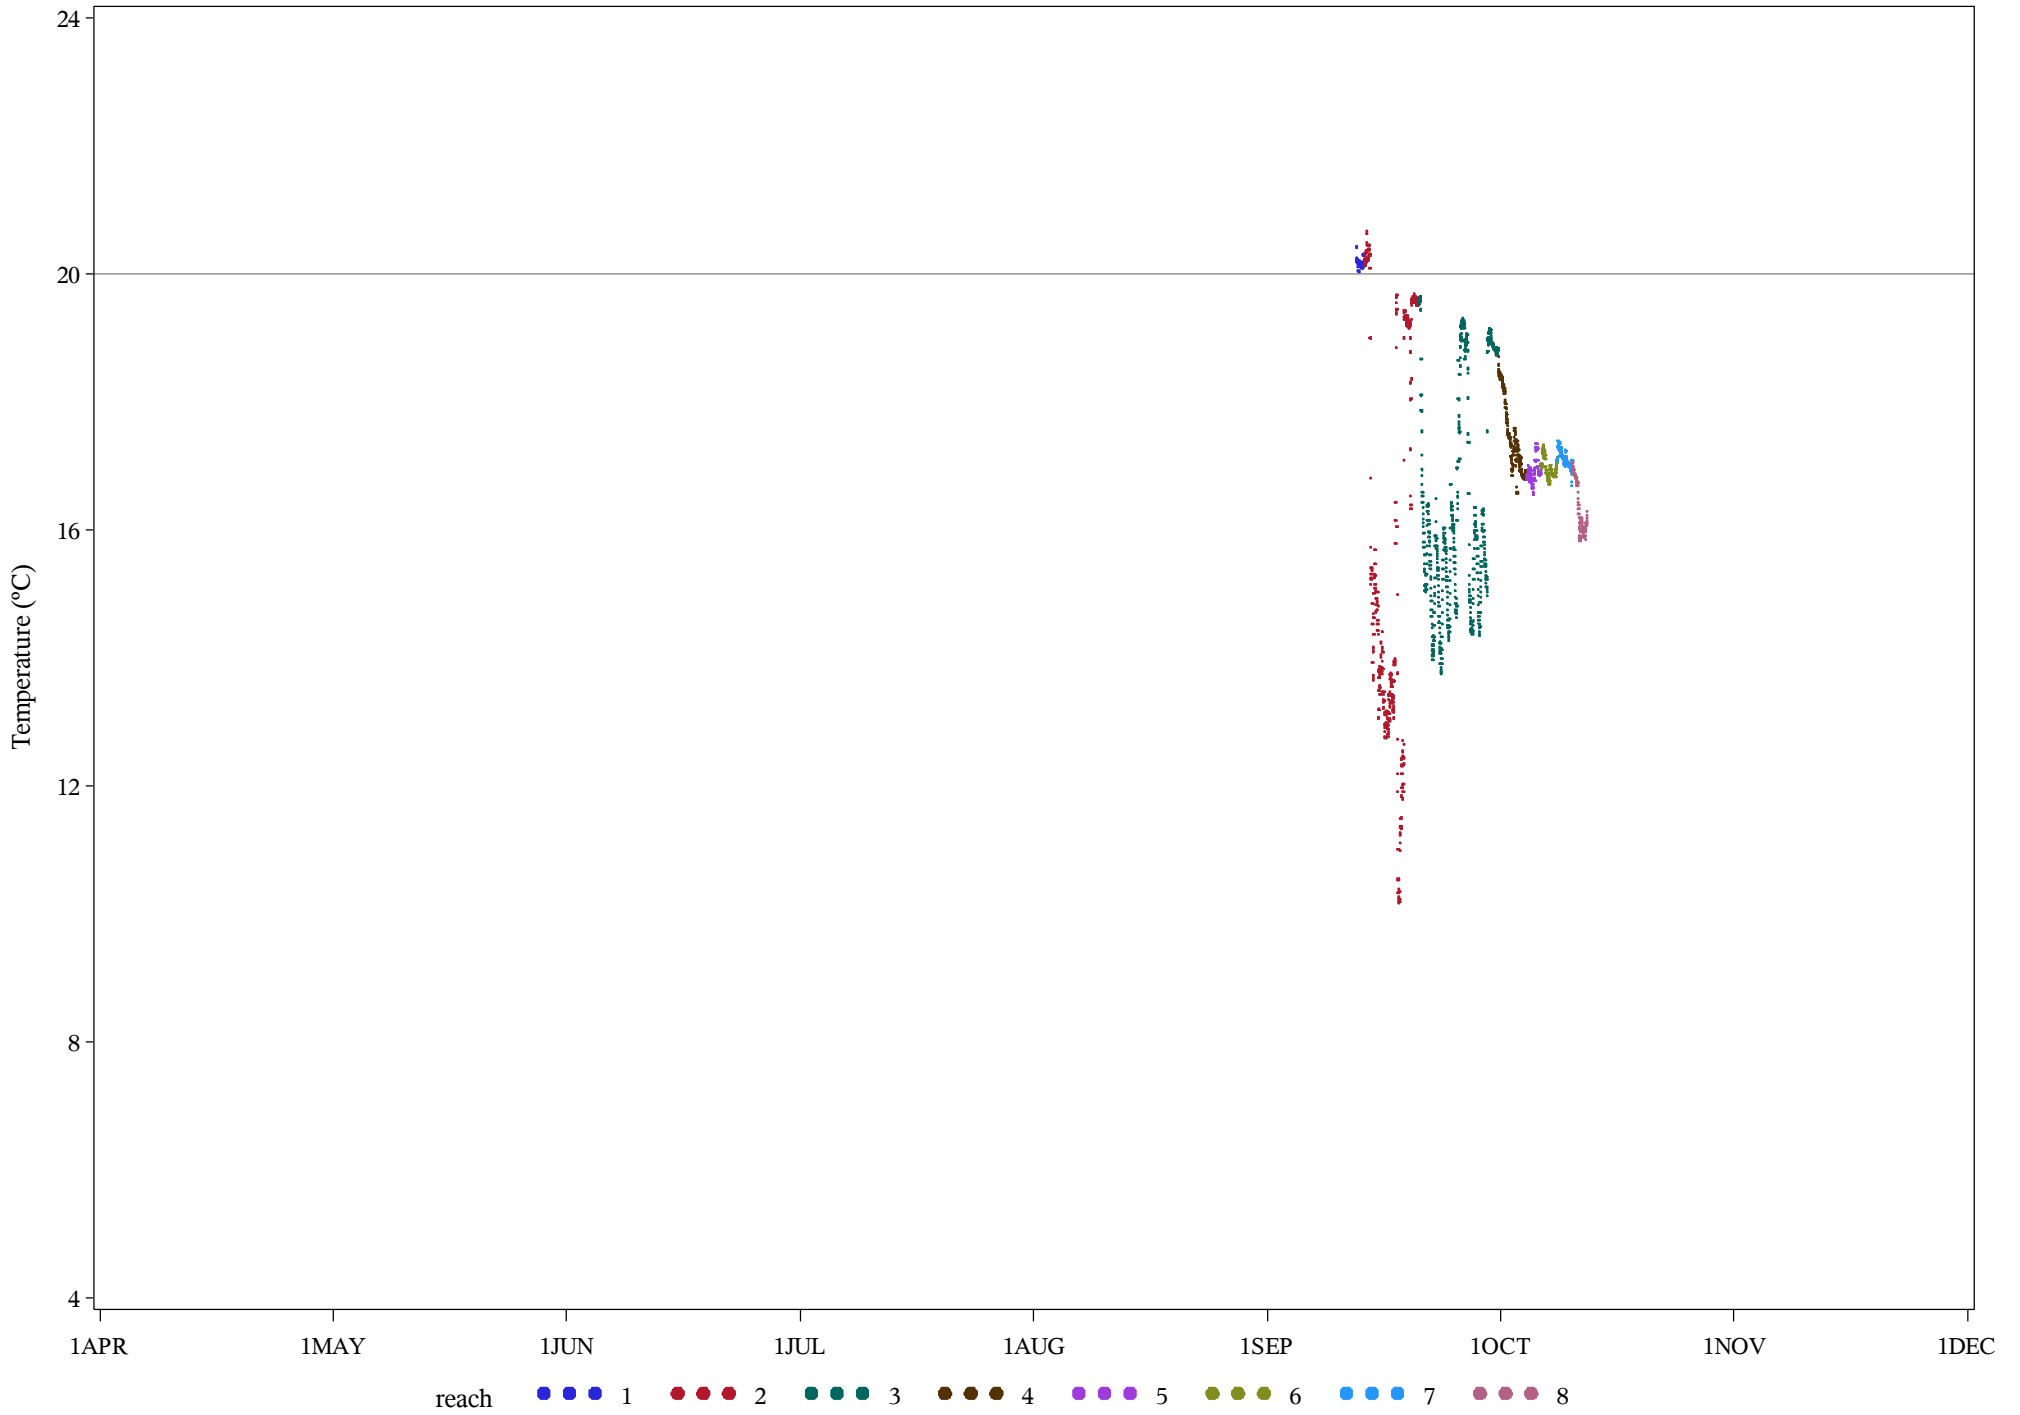

Steelhead  
3076B

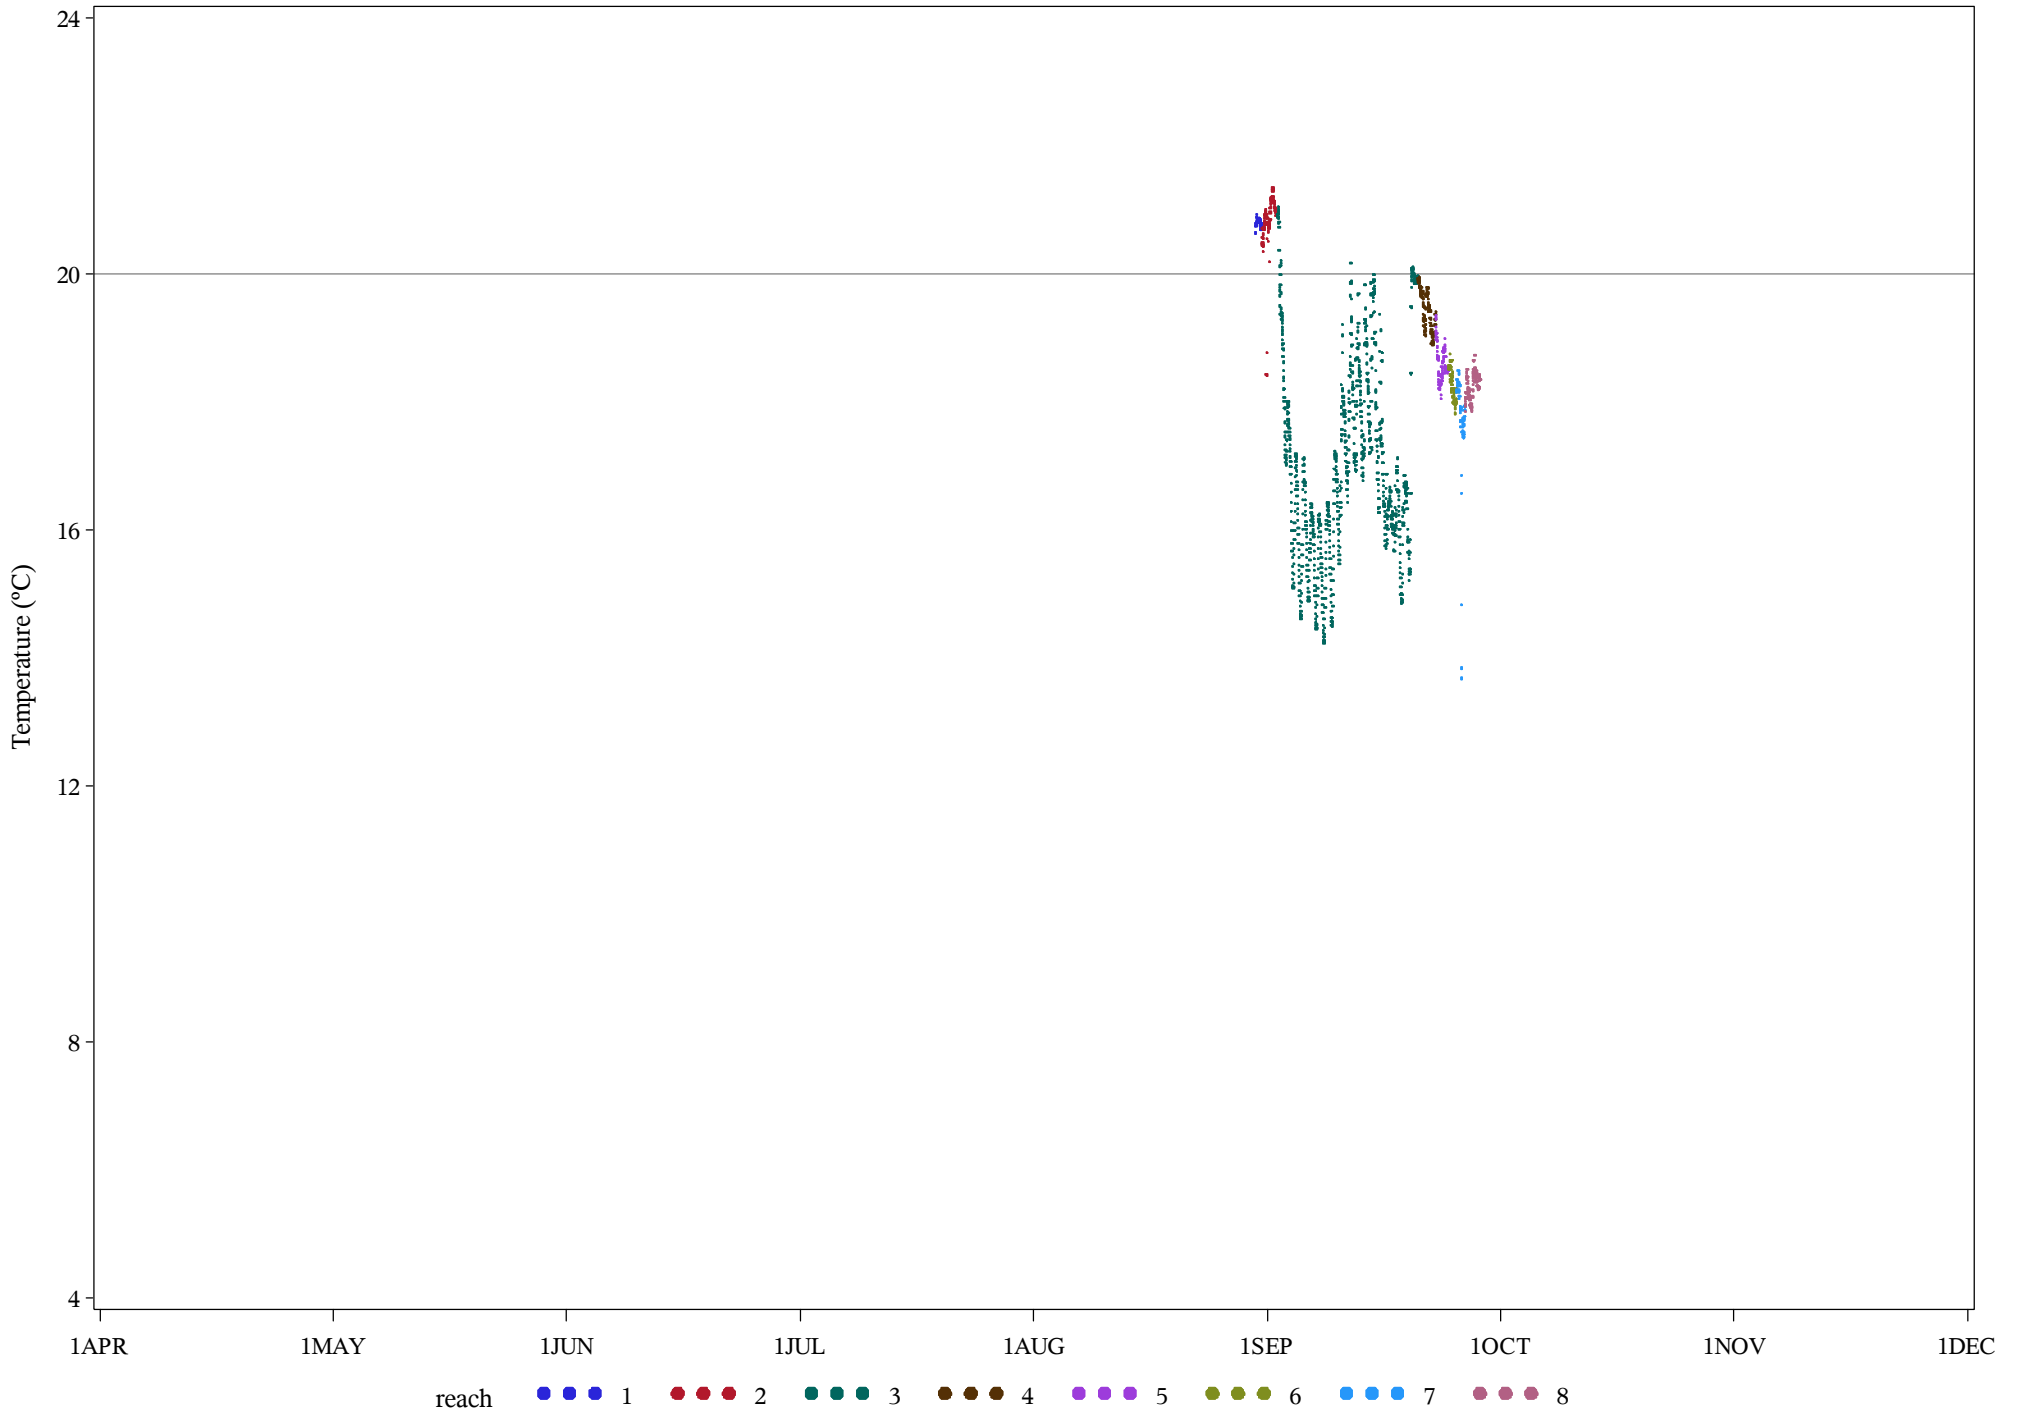

Steelhead  
3078C

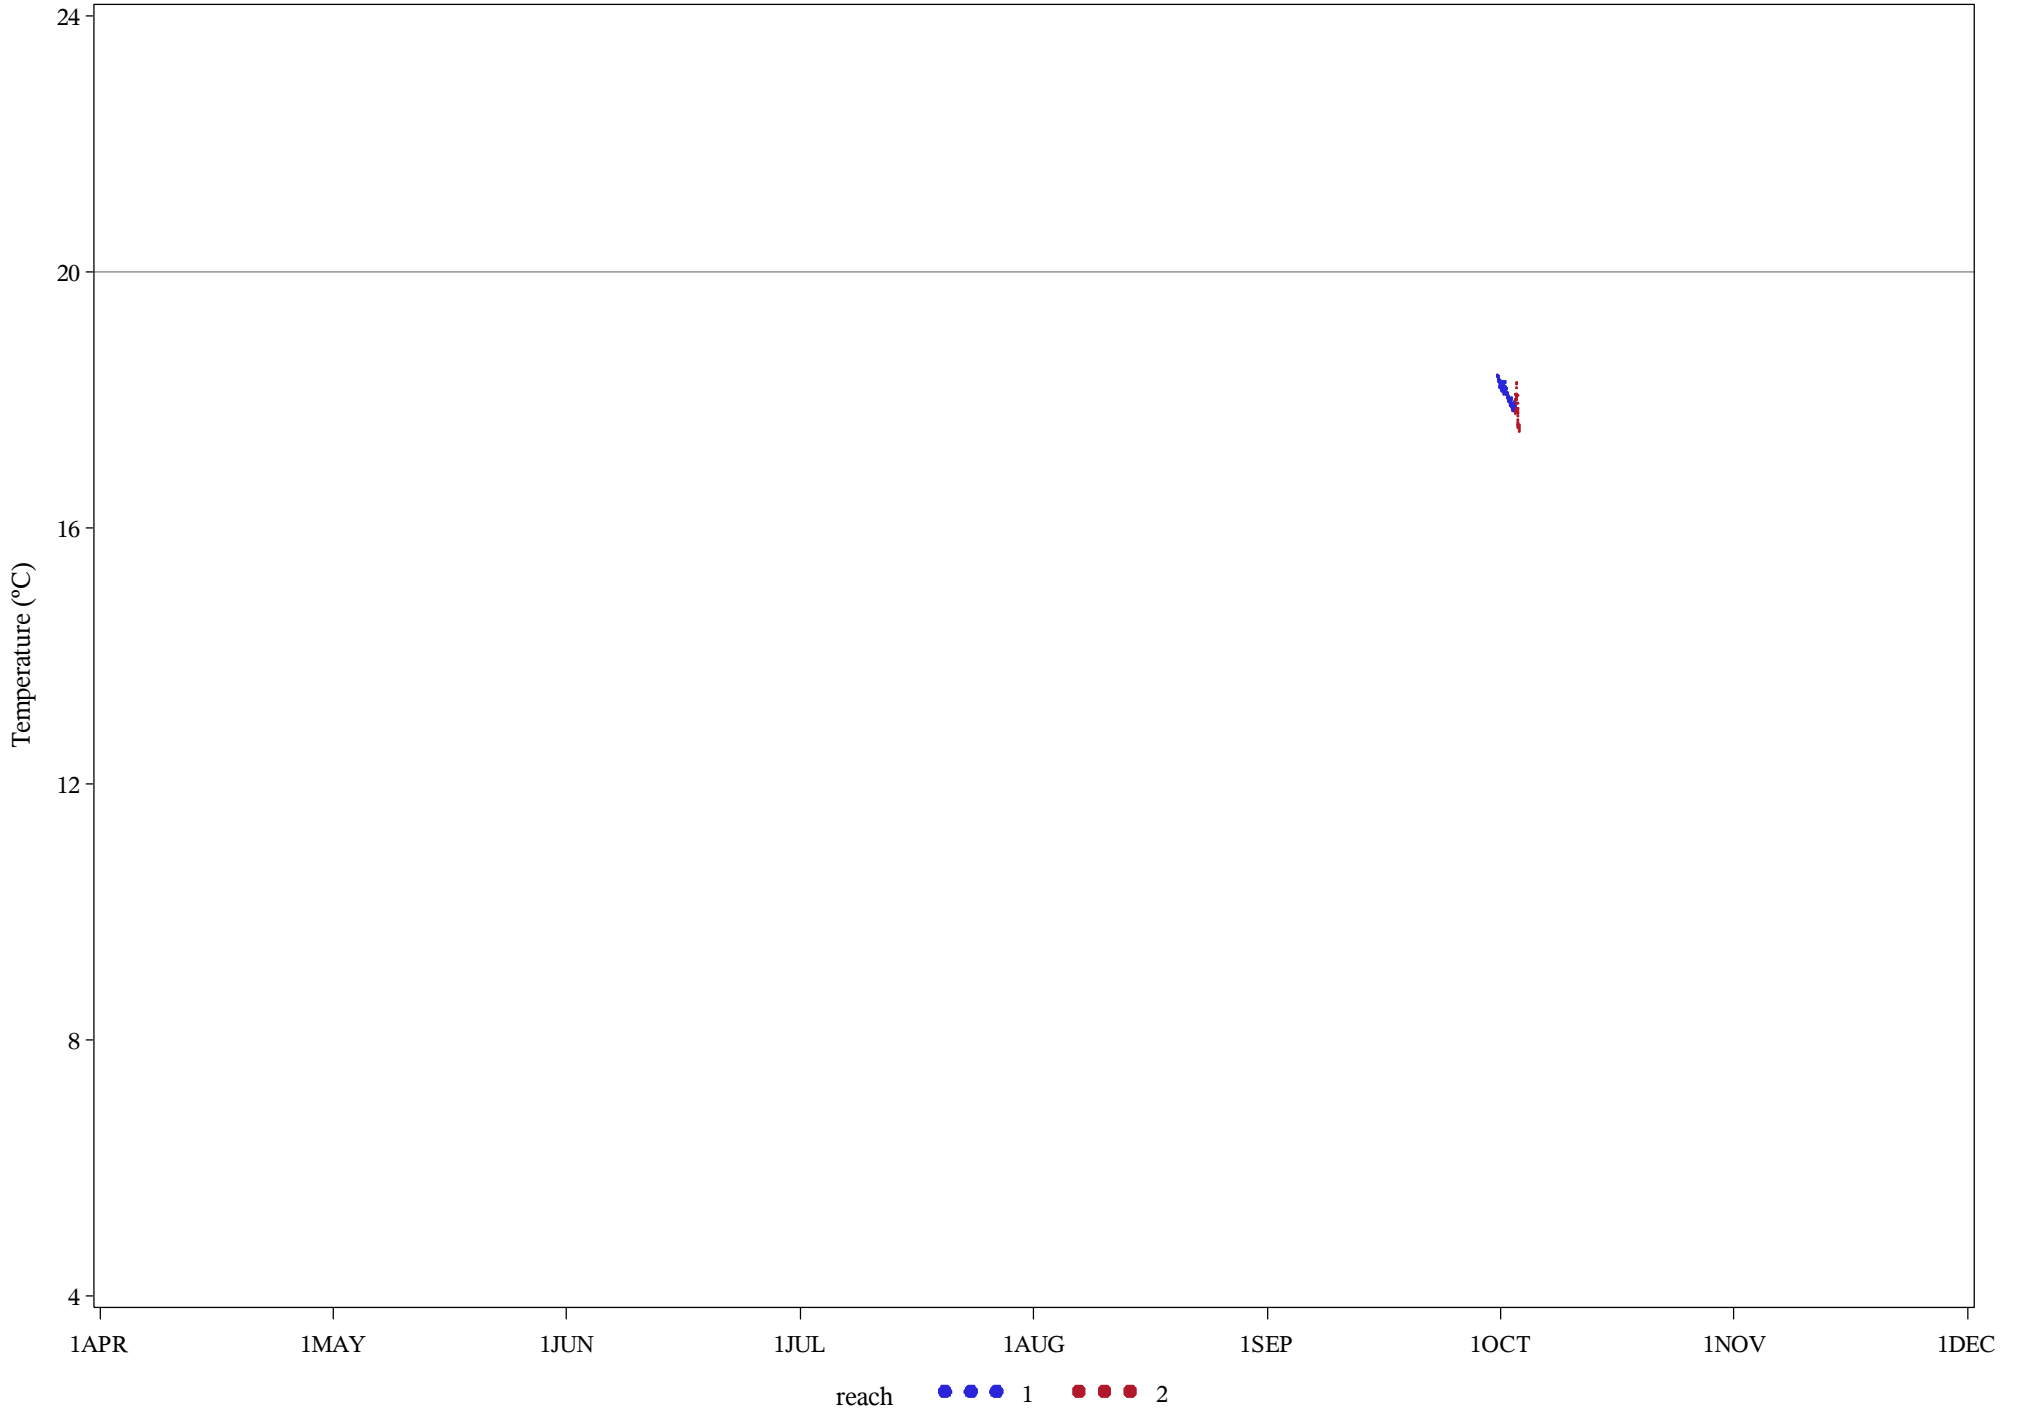

# Steelhead 3118B

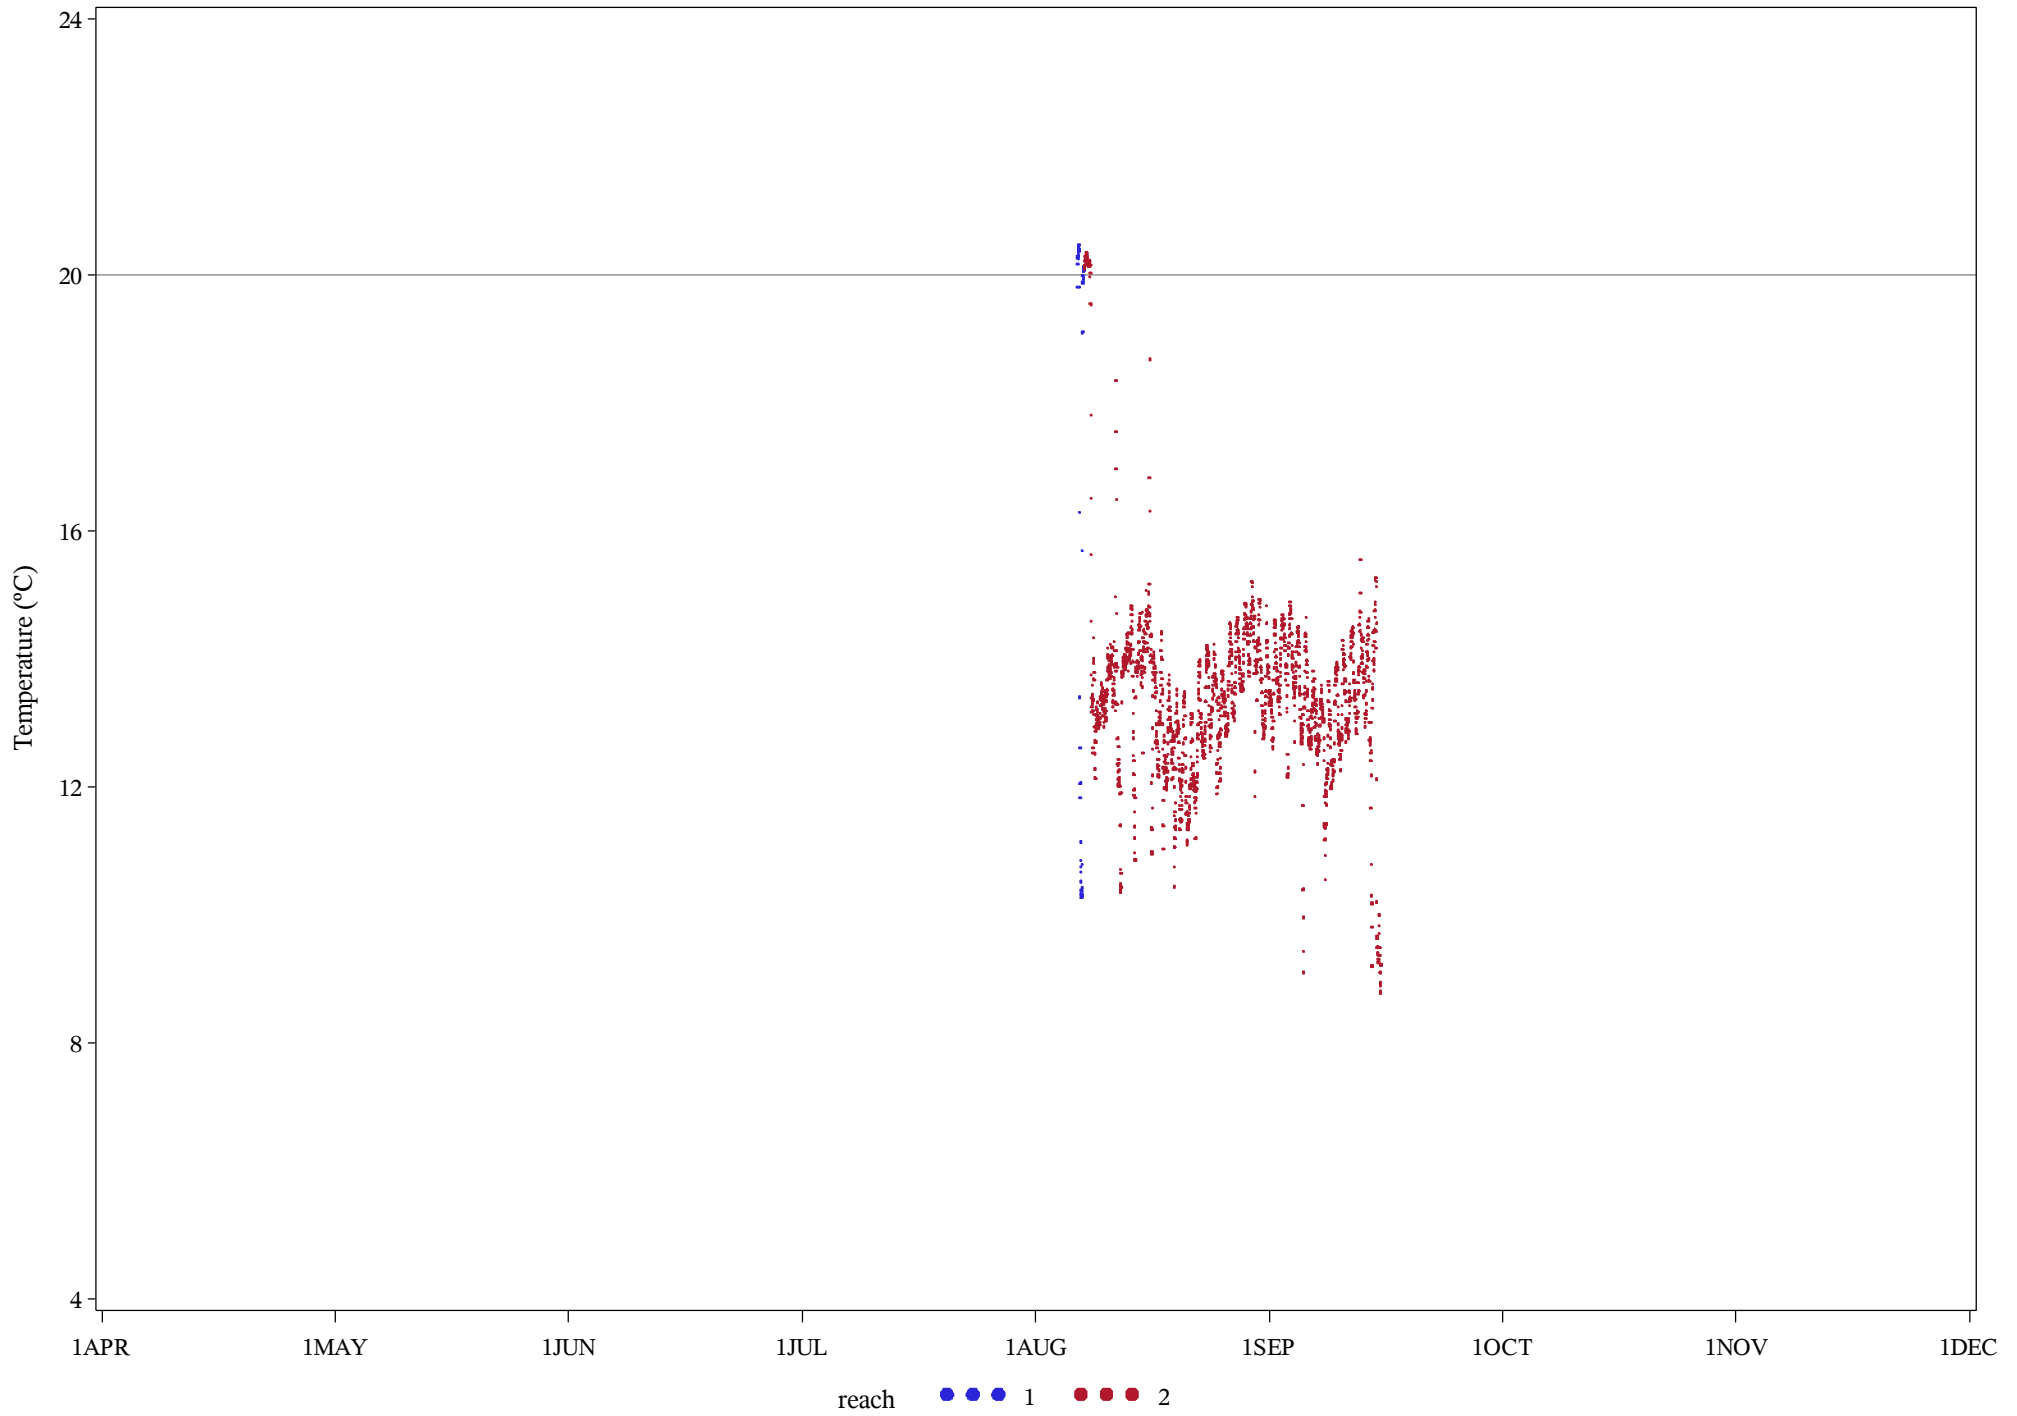

# Steelhead 3271B

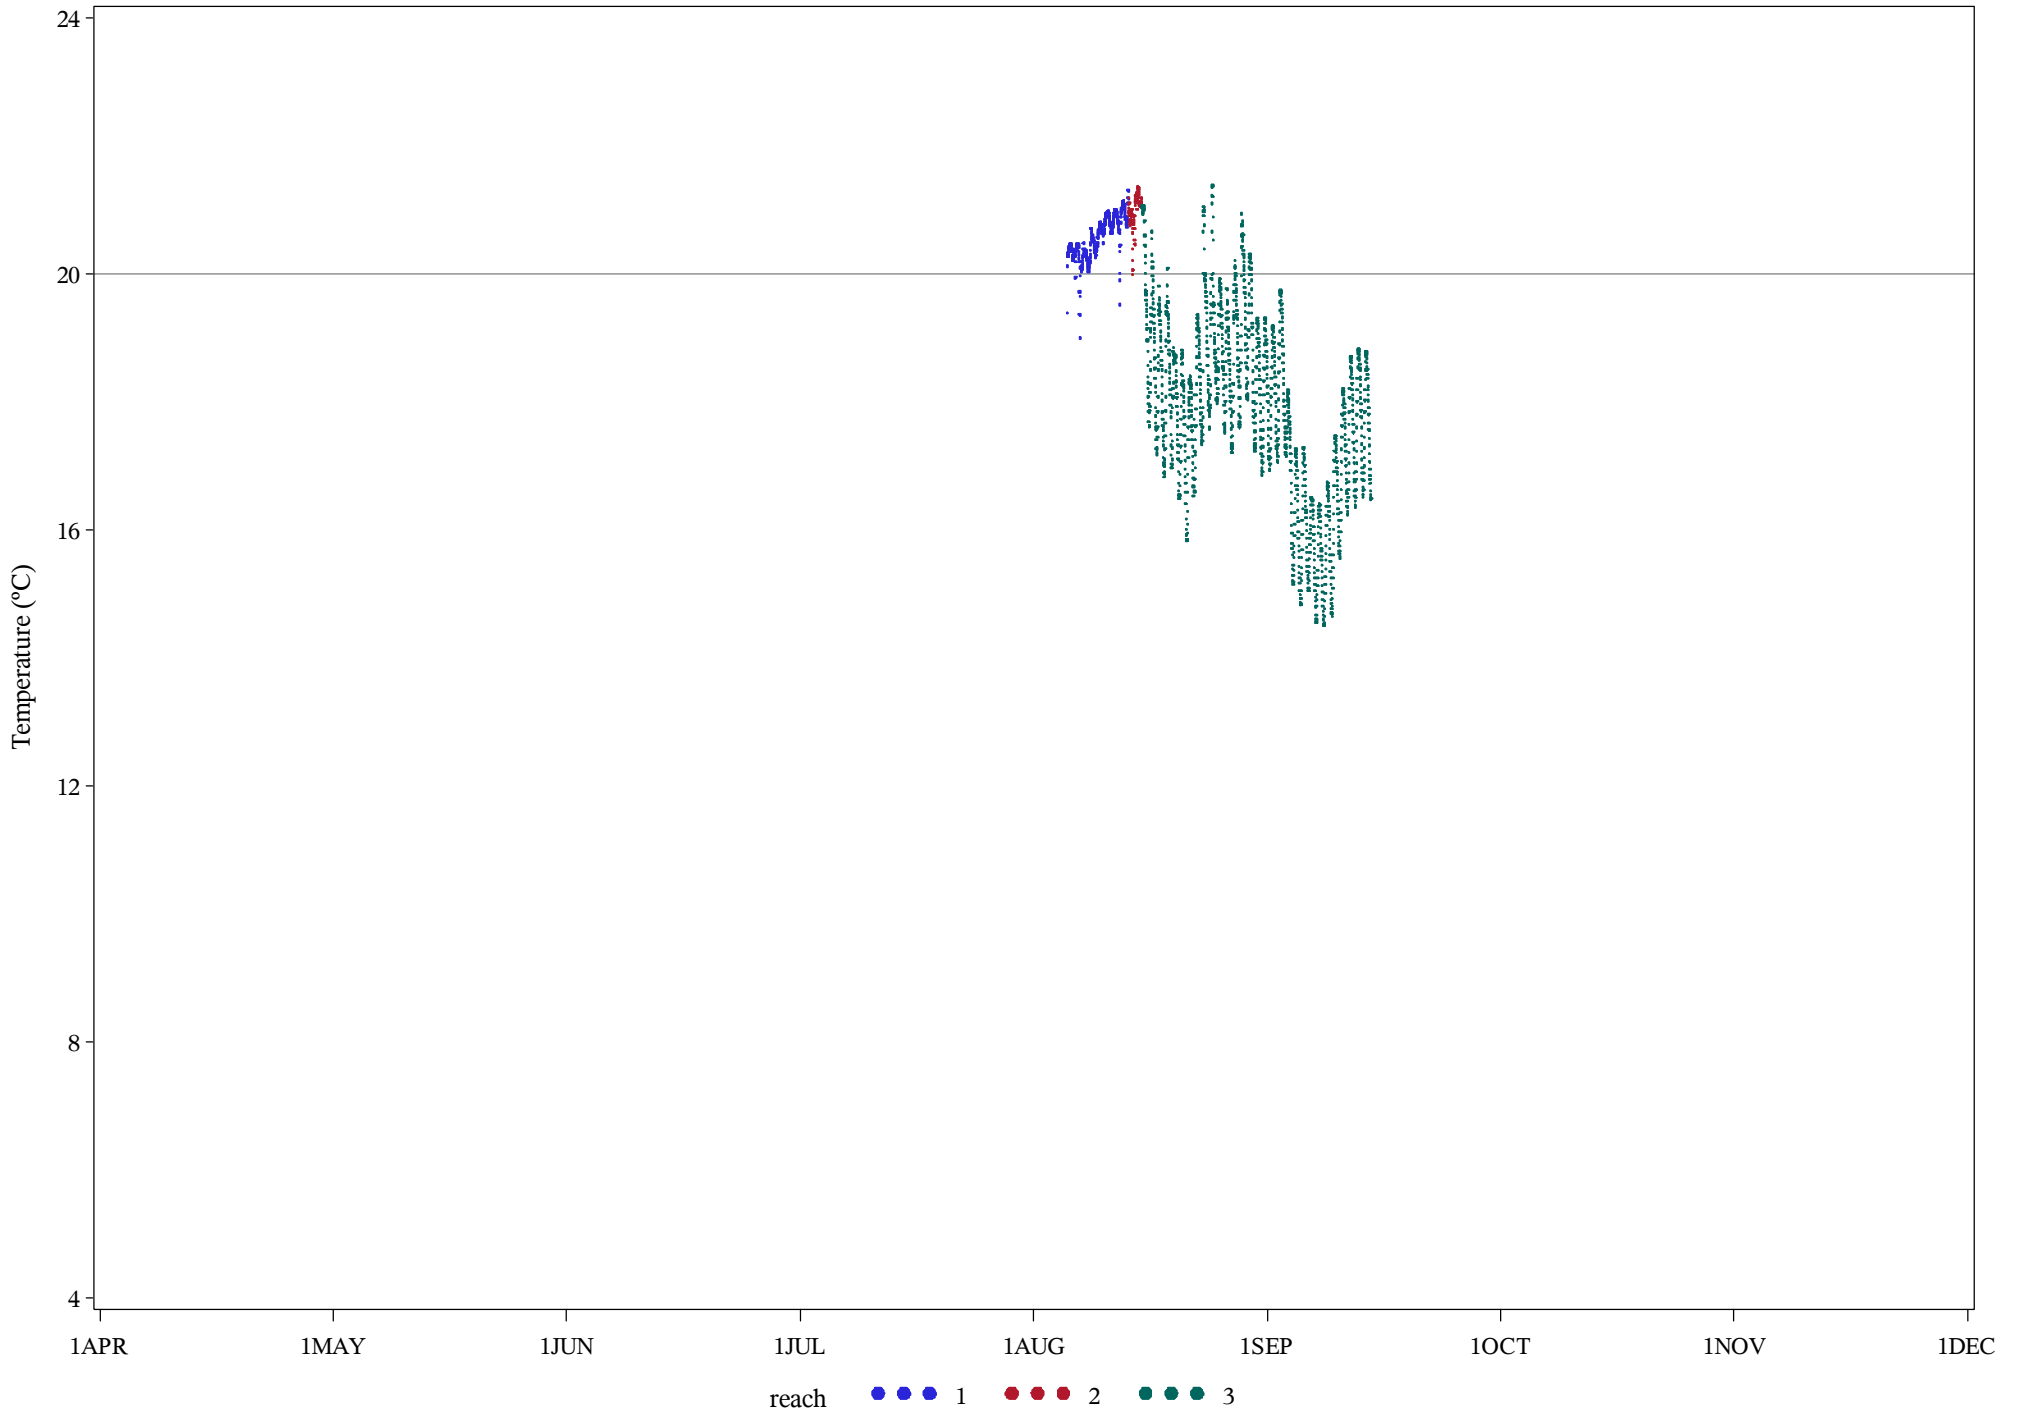



# Steelhead 3535B

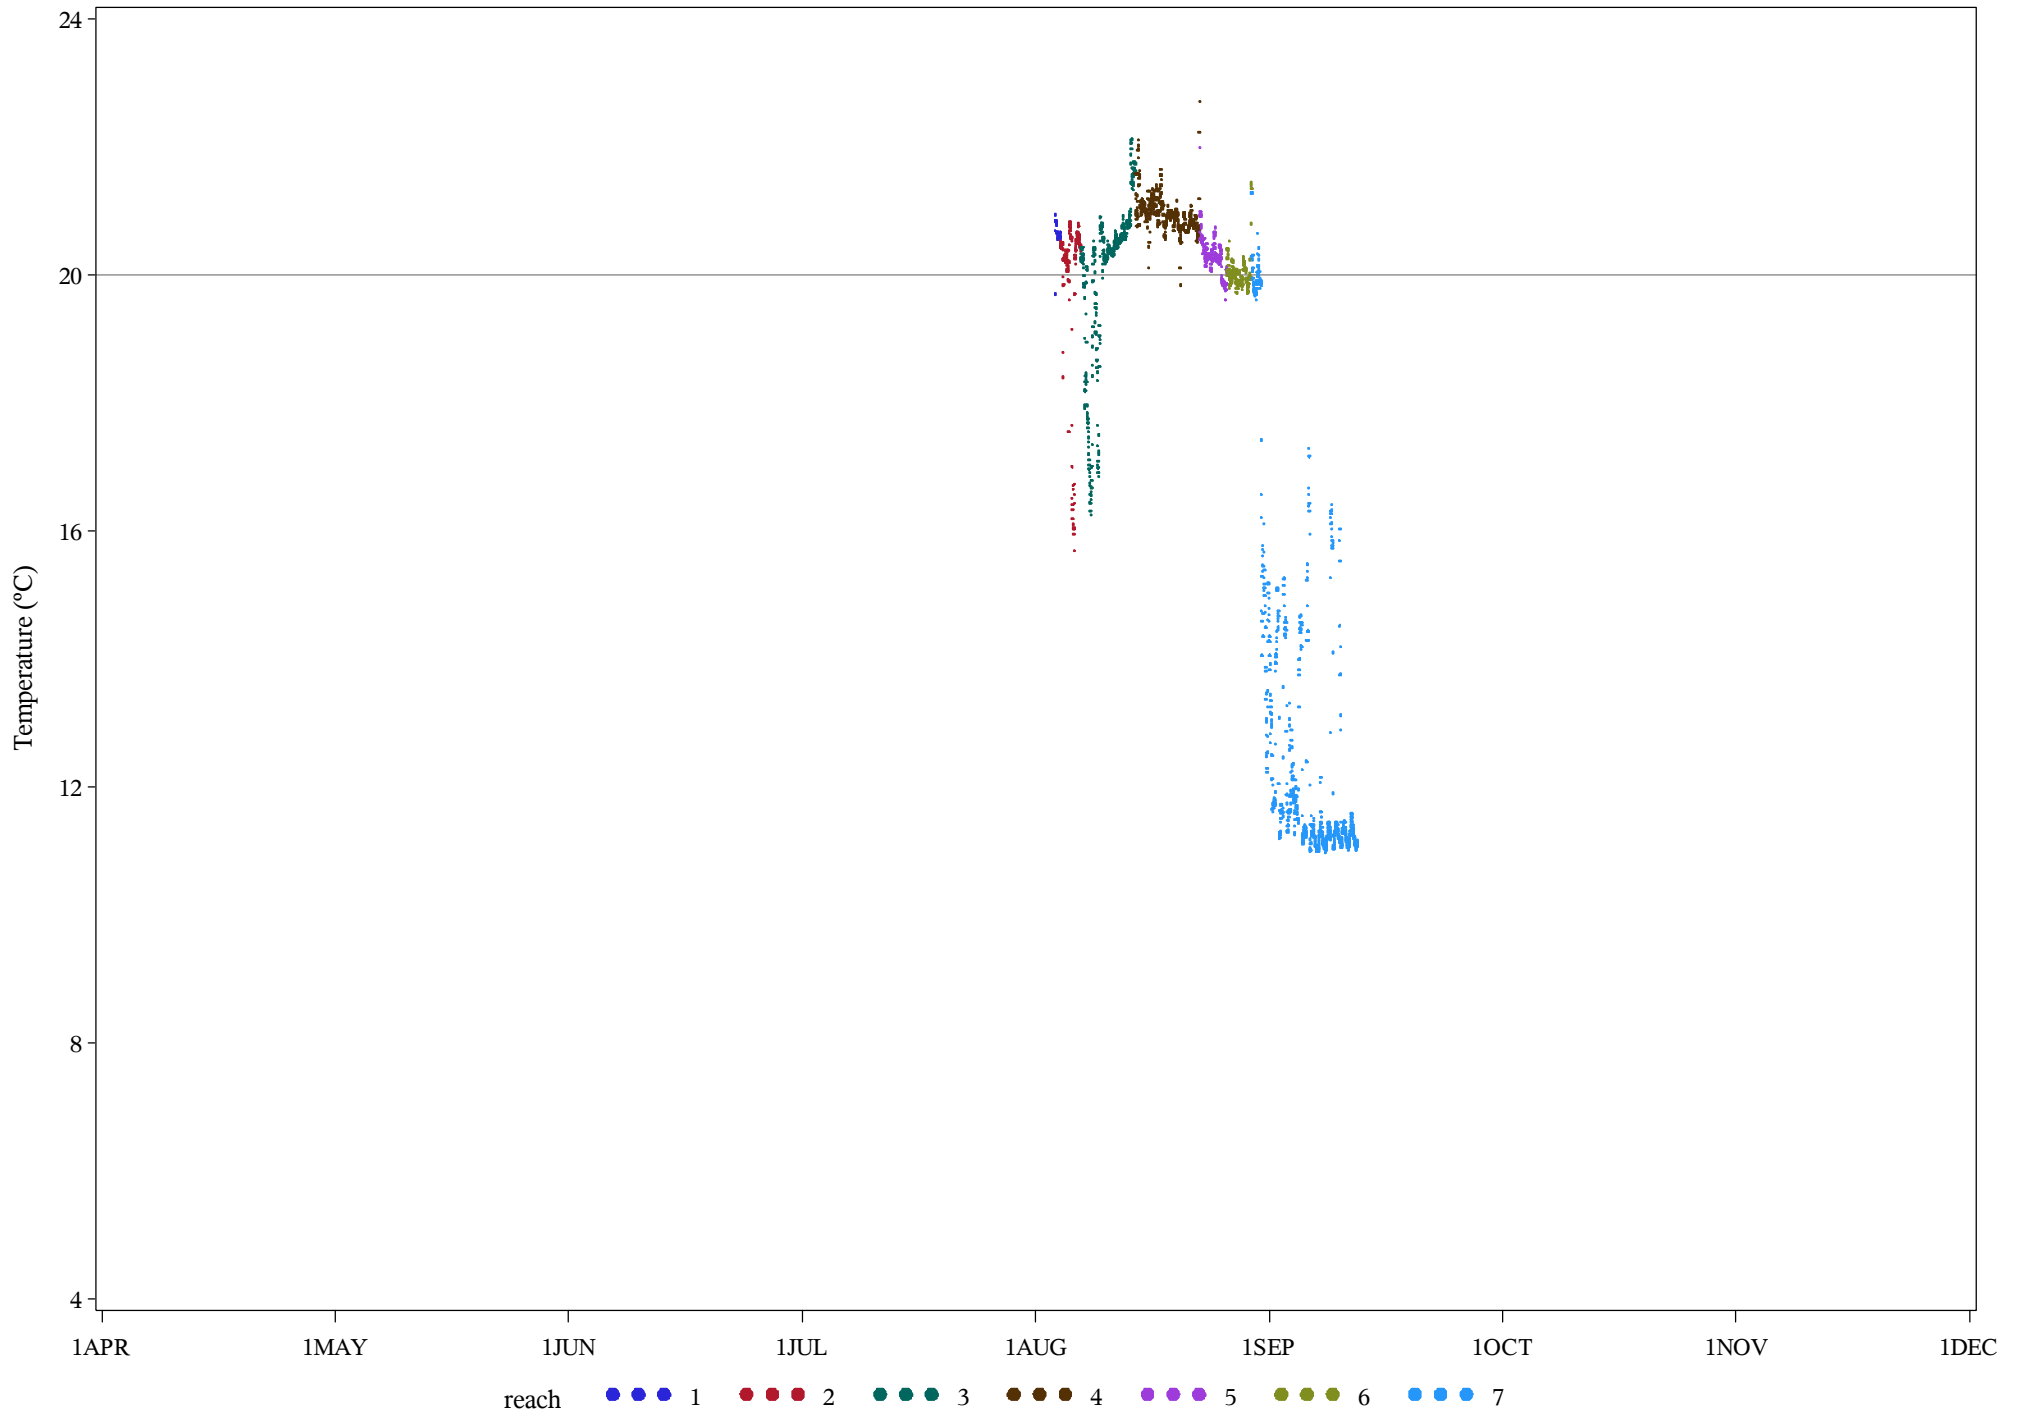

# Steelhead 3551B

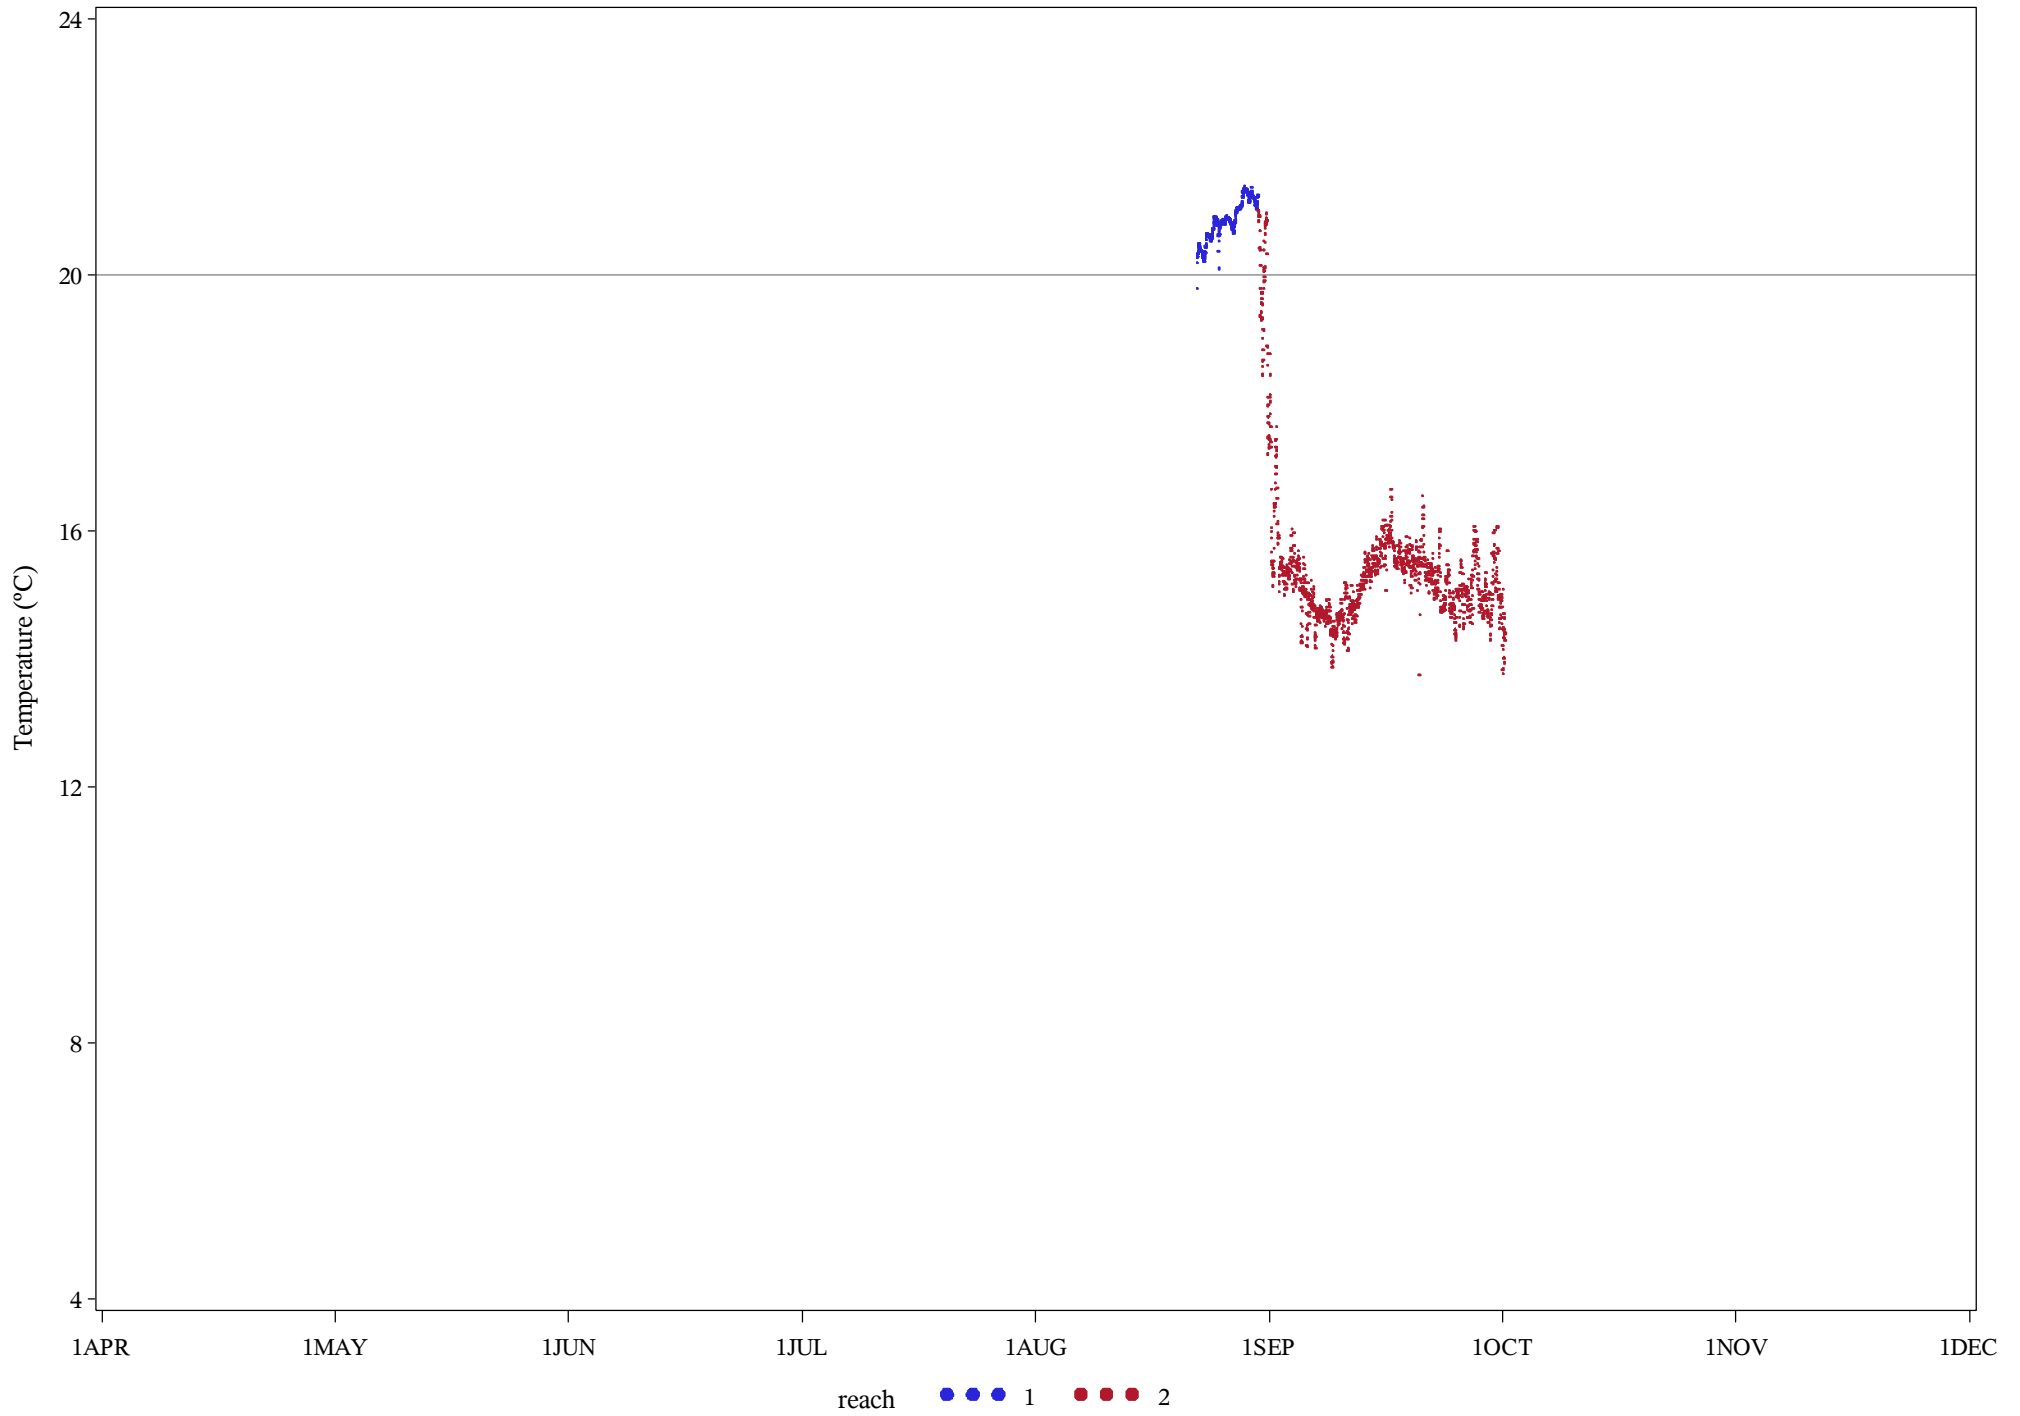



# Steelhead 3577B

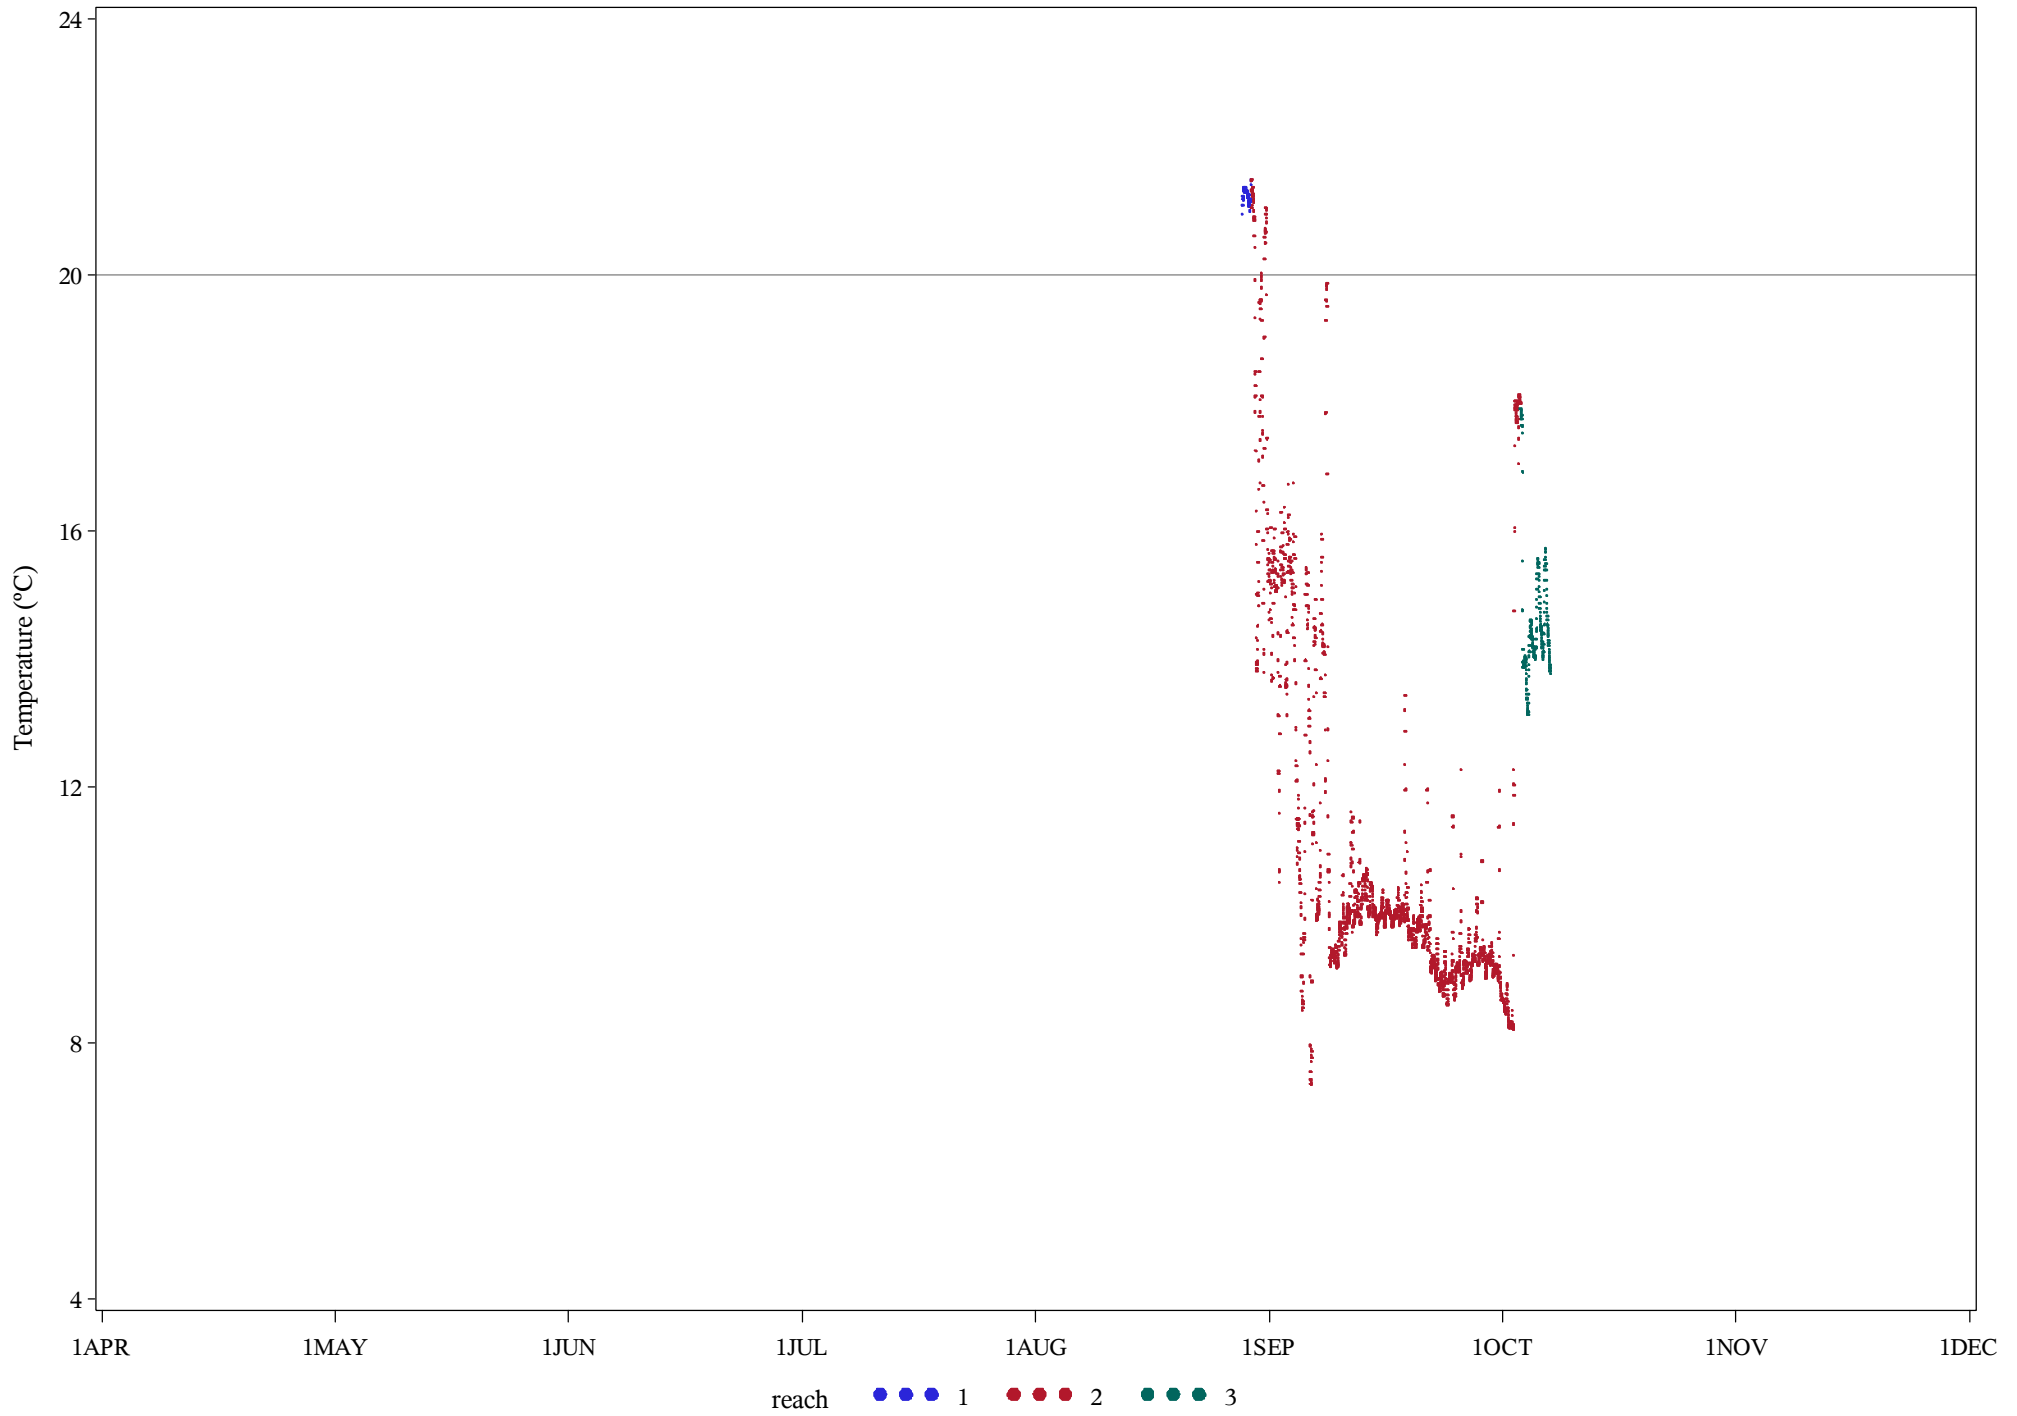

# Steelhead 3705B

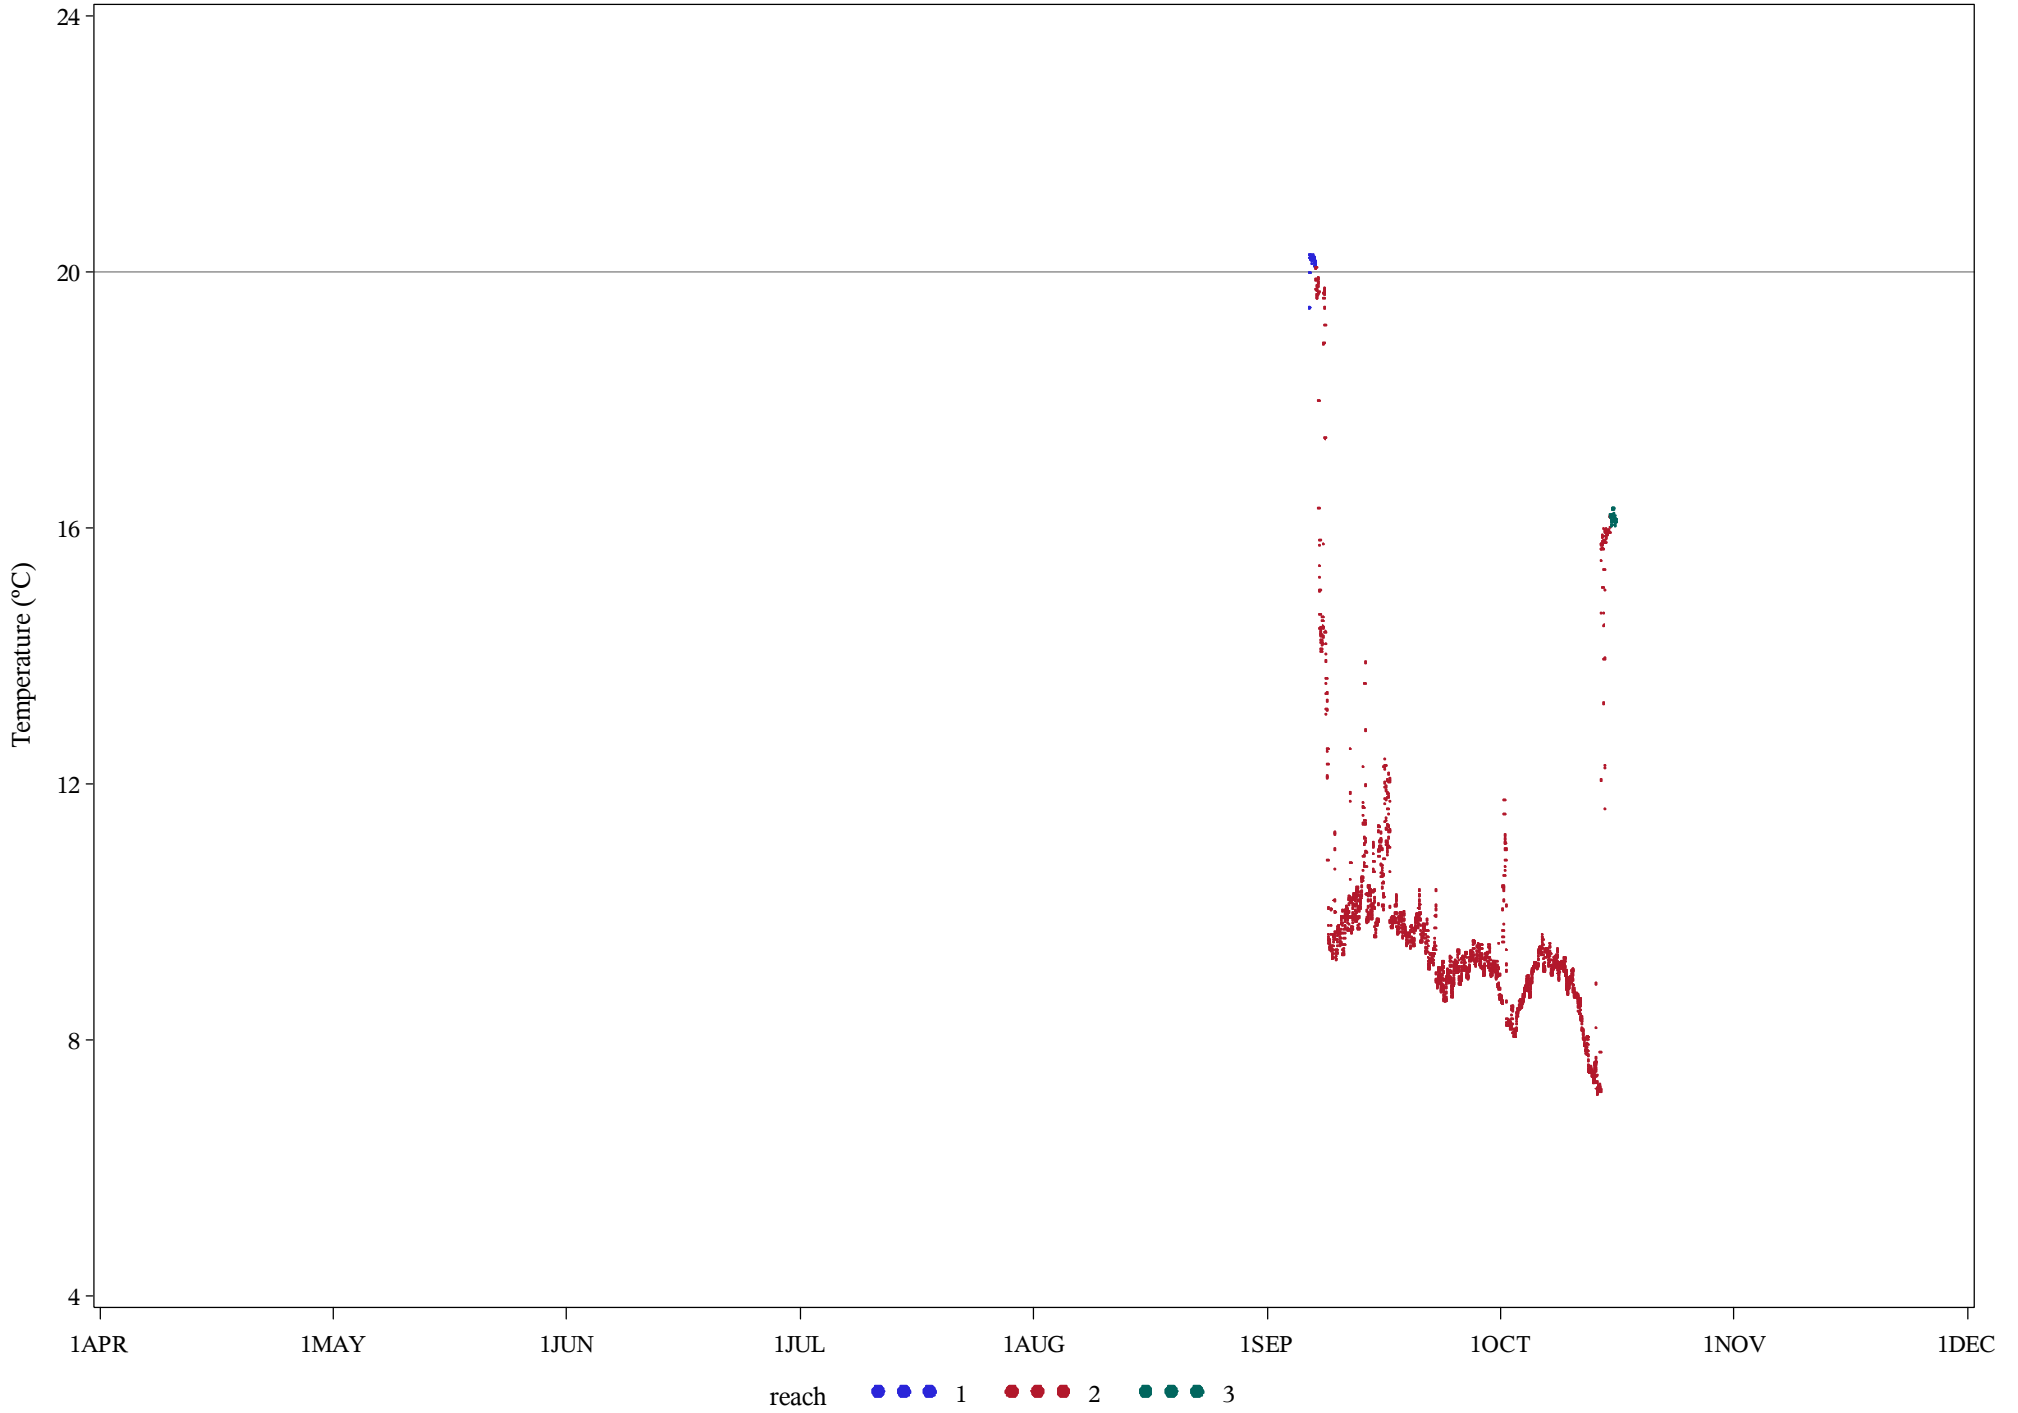

# Steelhead 3710B

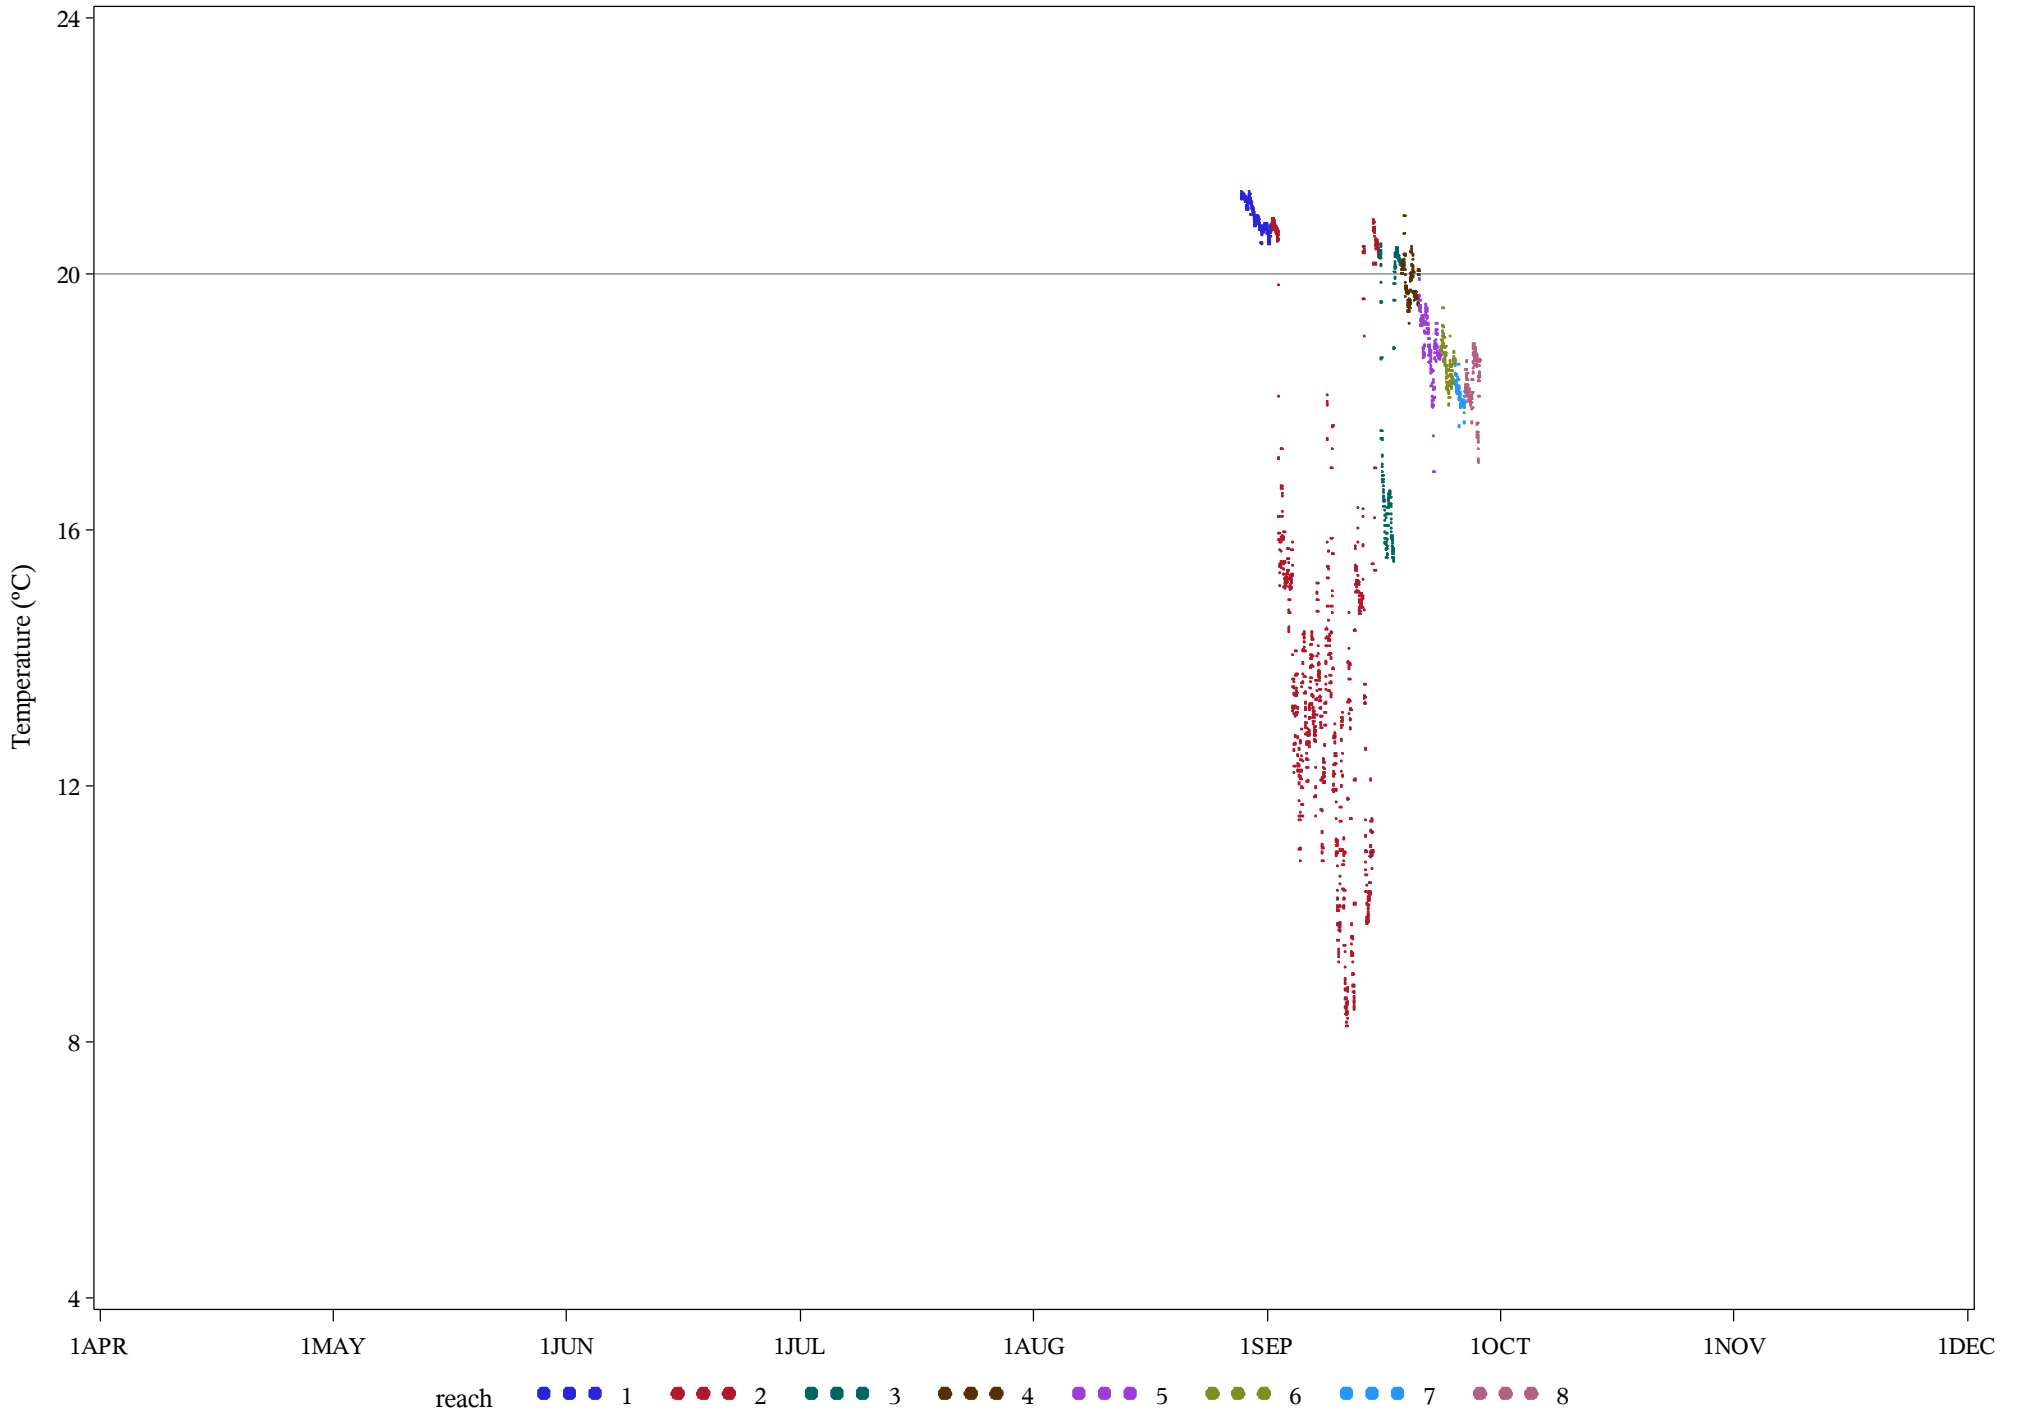

# Steelhead 3718B

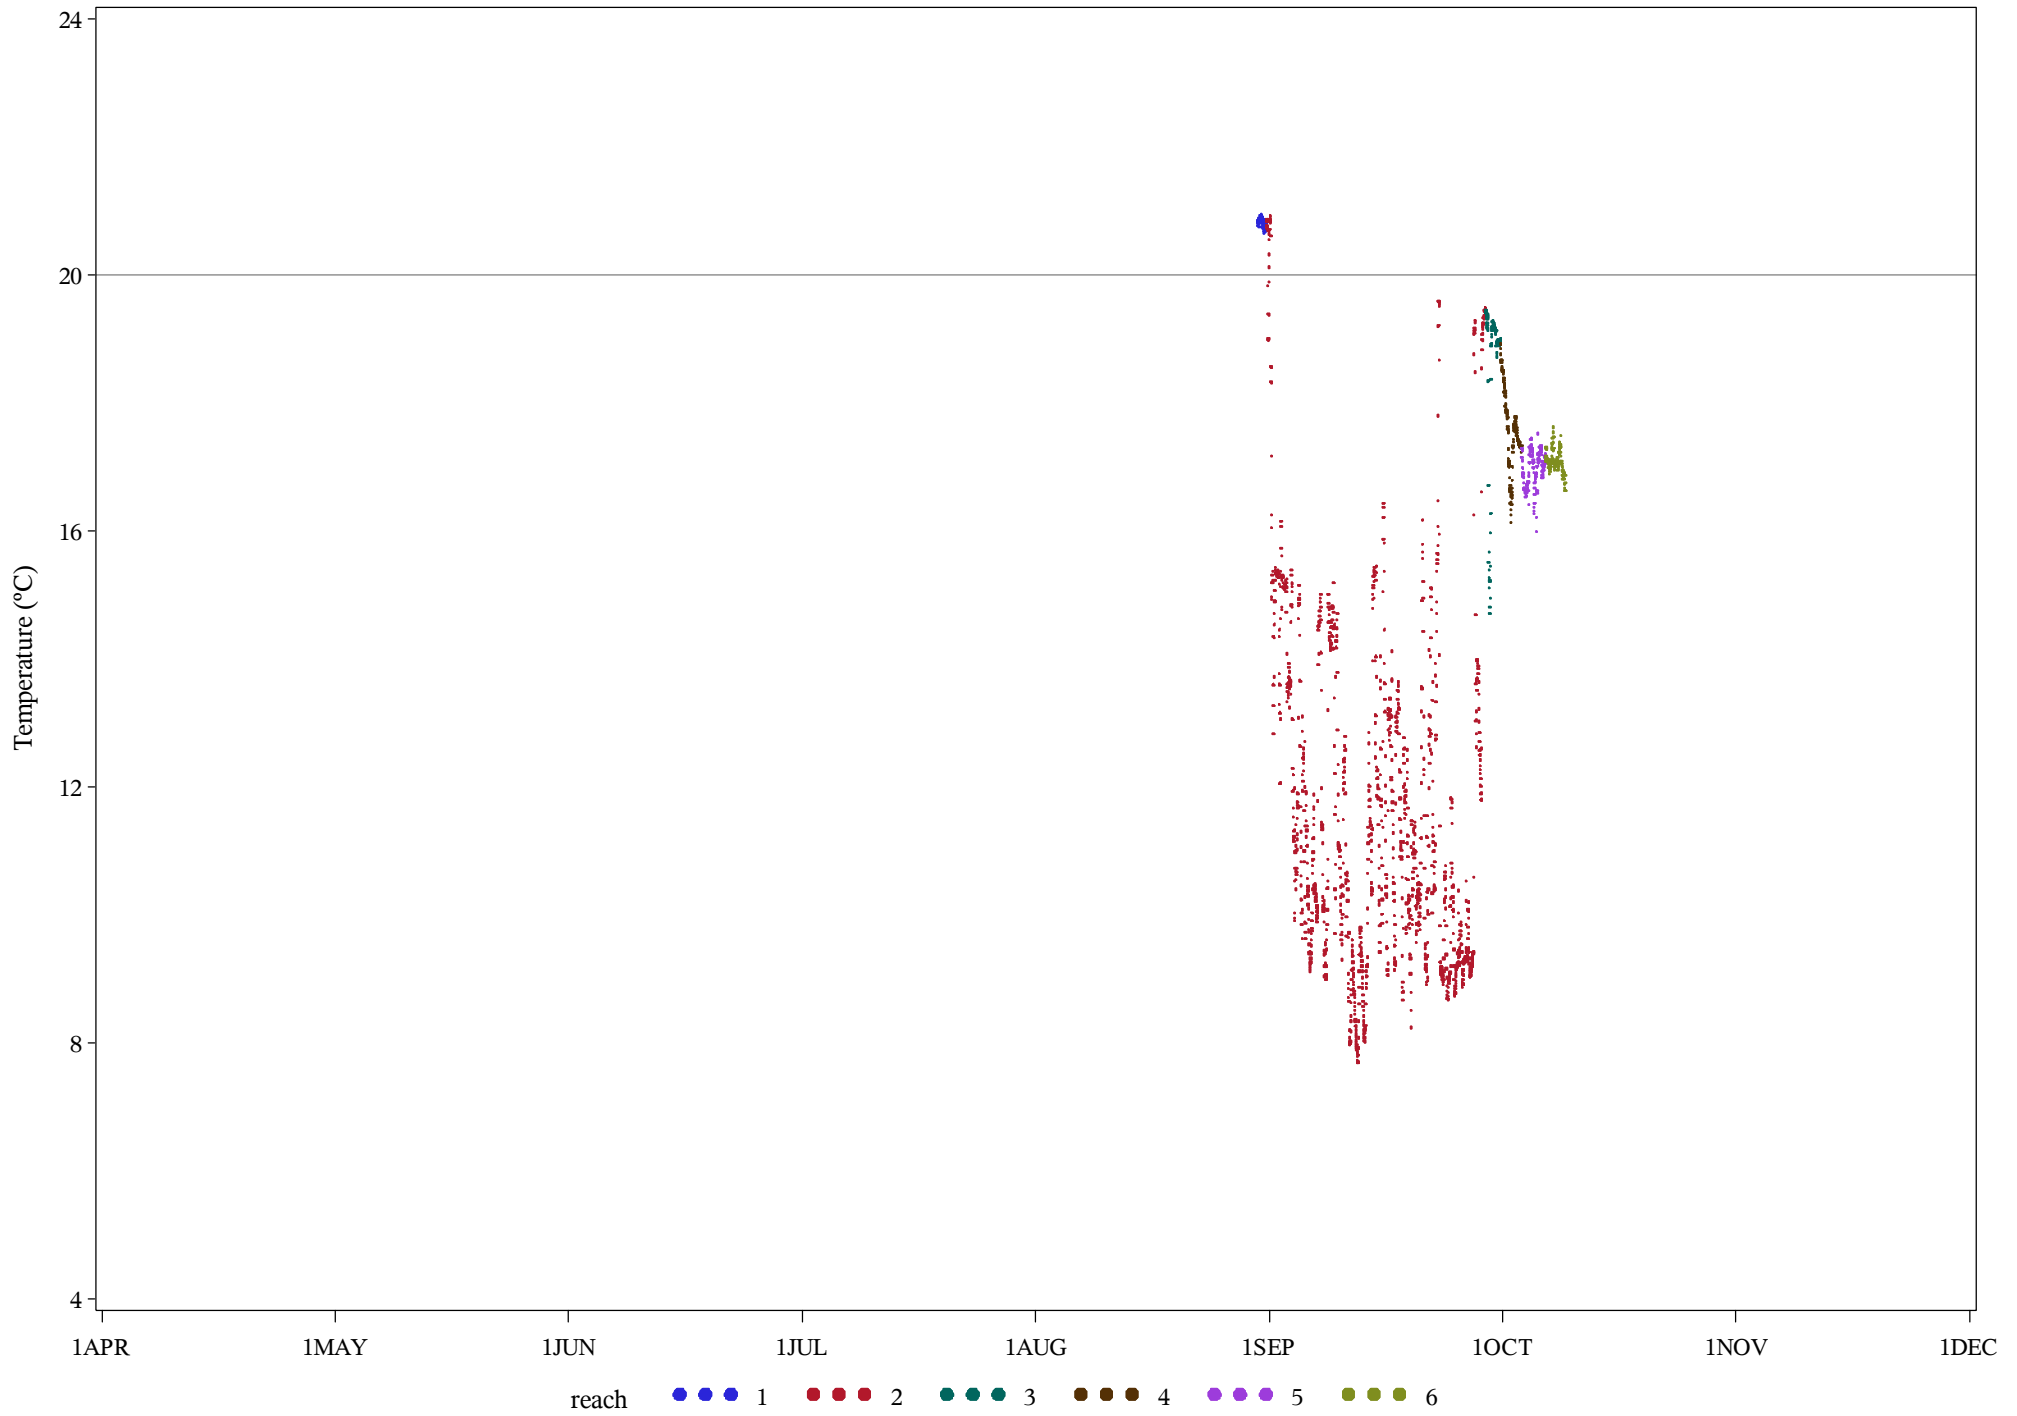

Steelhead  
3763B

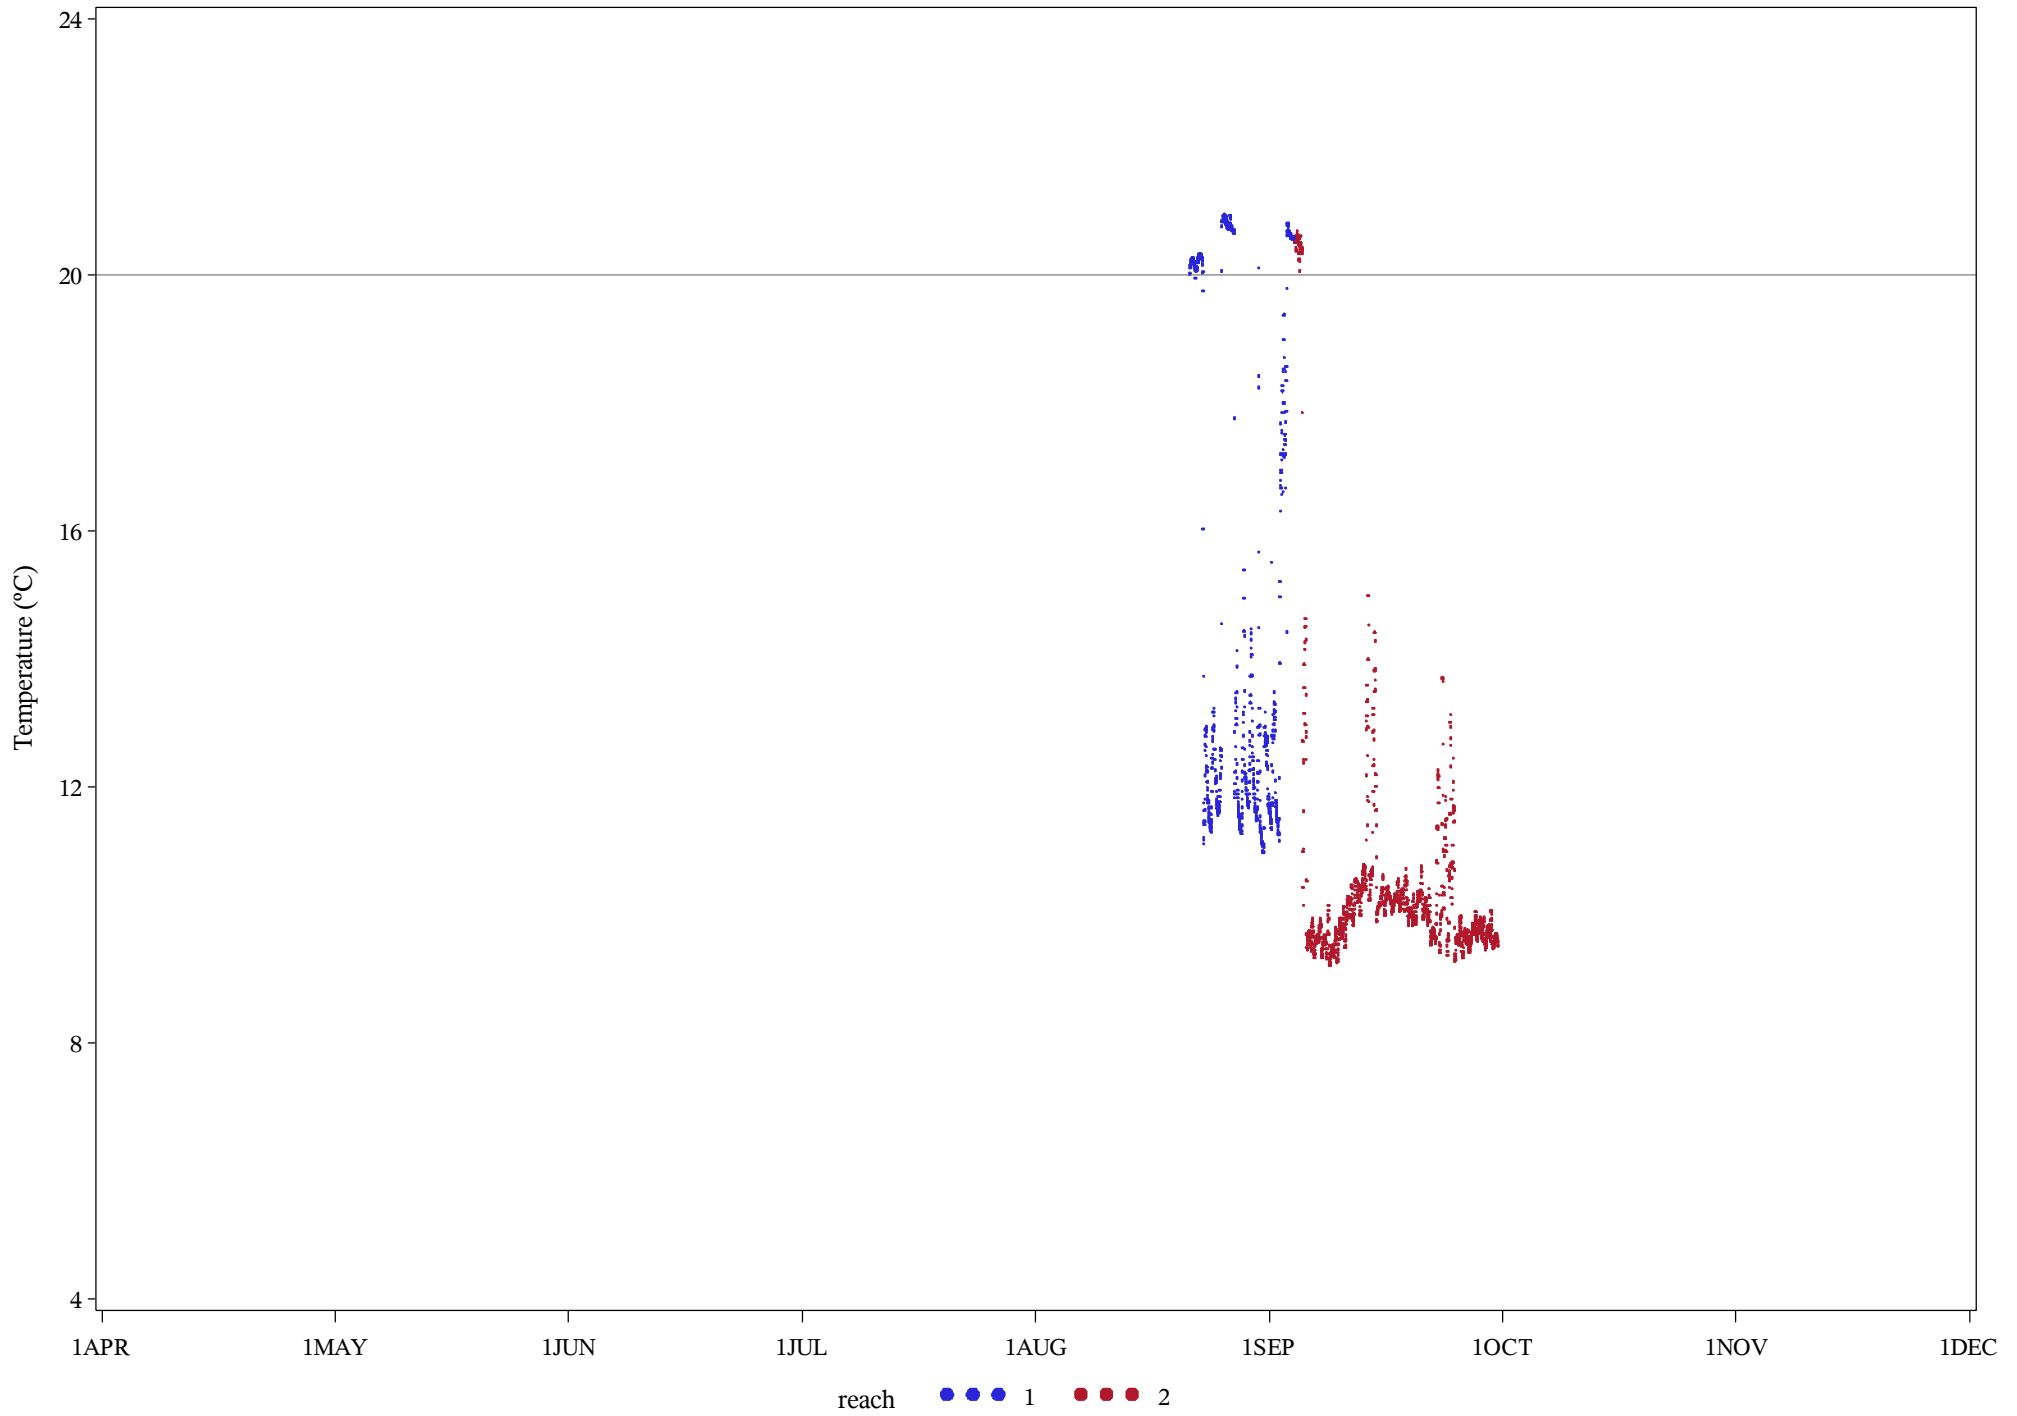



# Steelhead 3765B

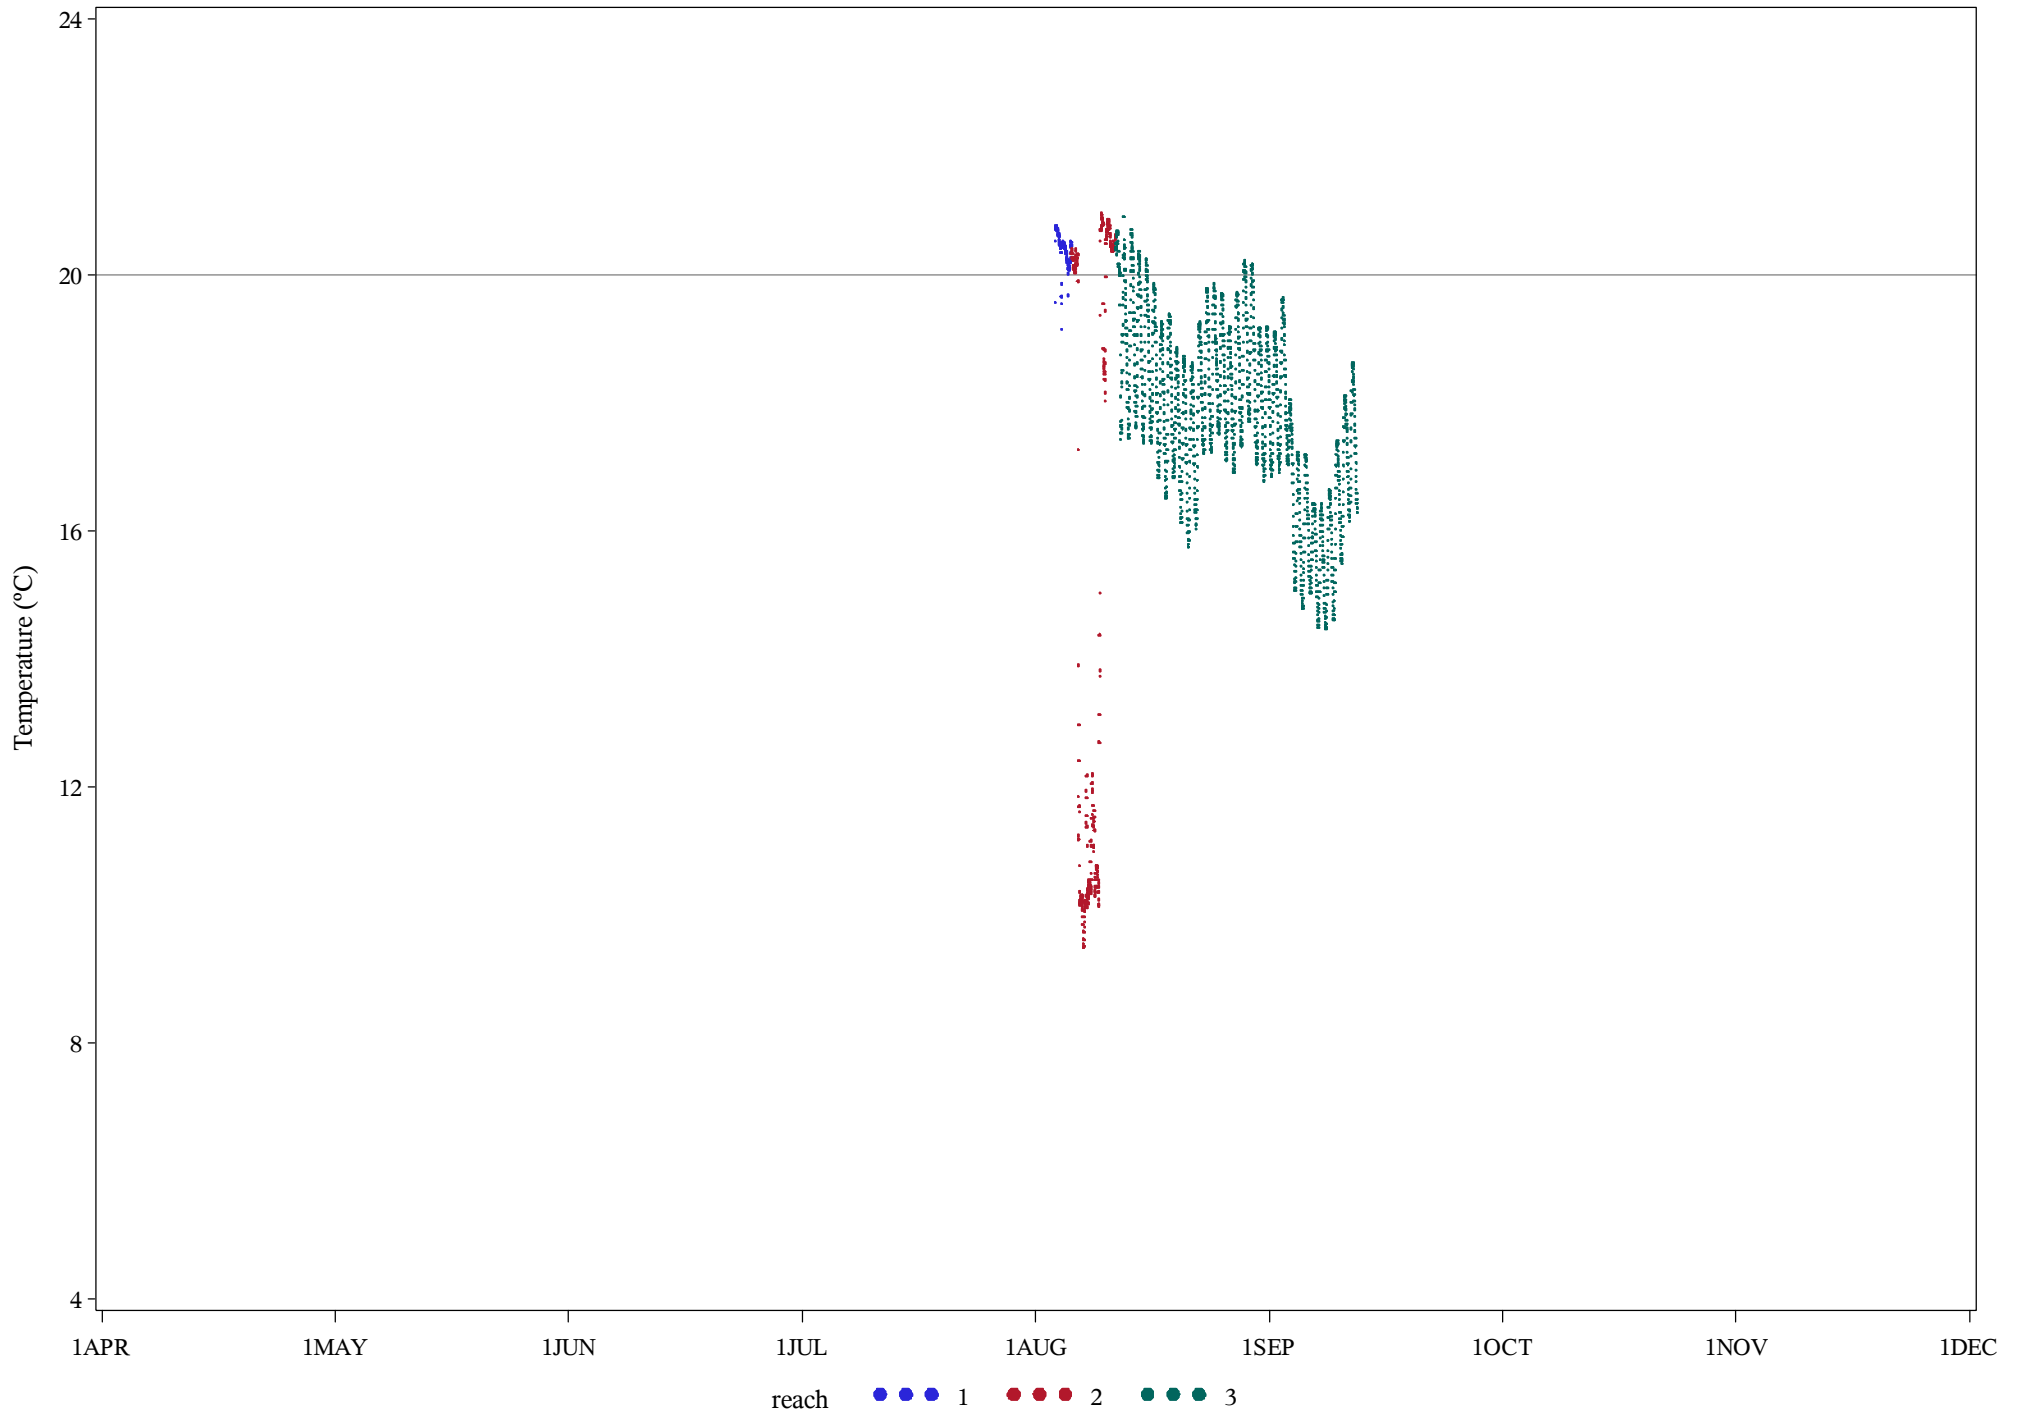

# Steelhead 3768B

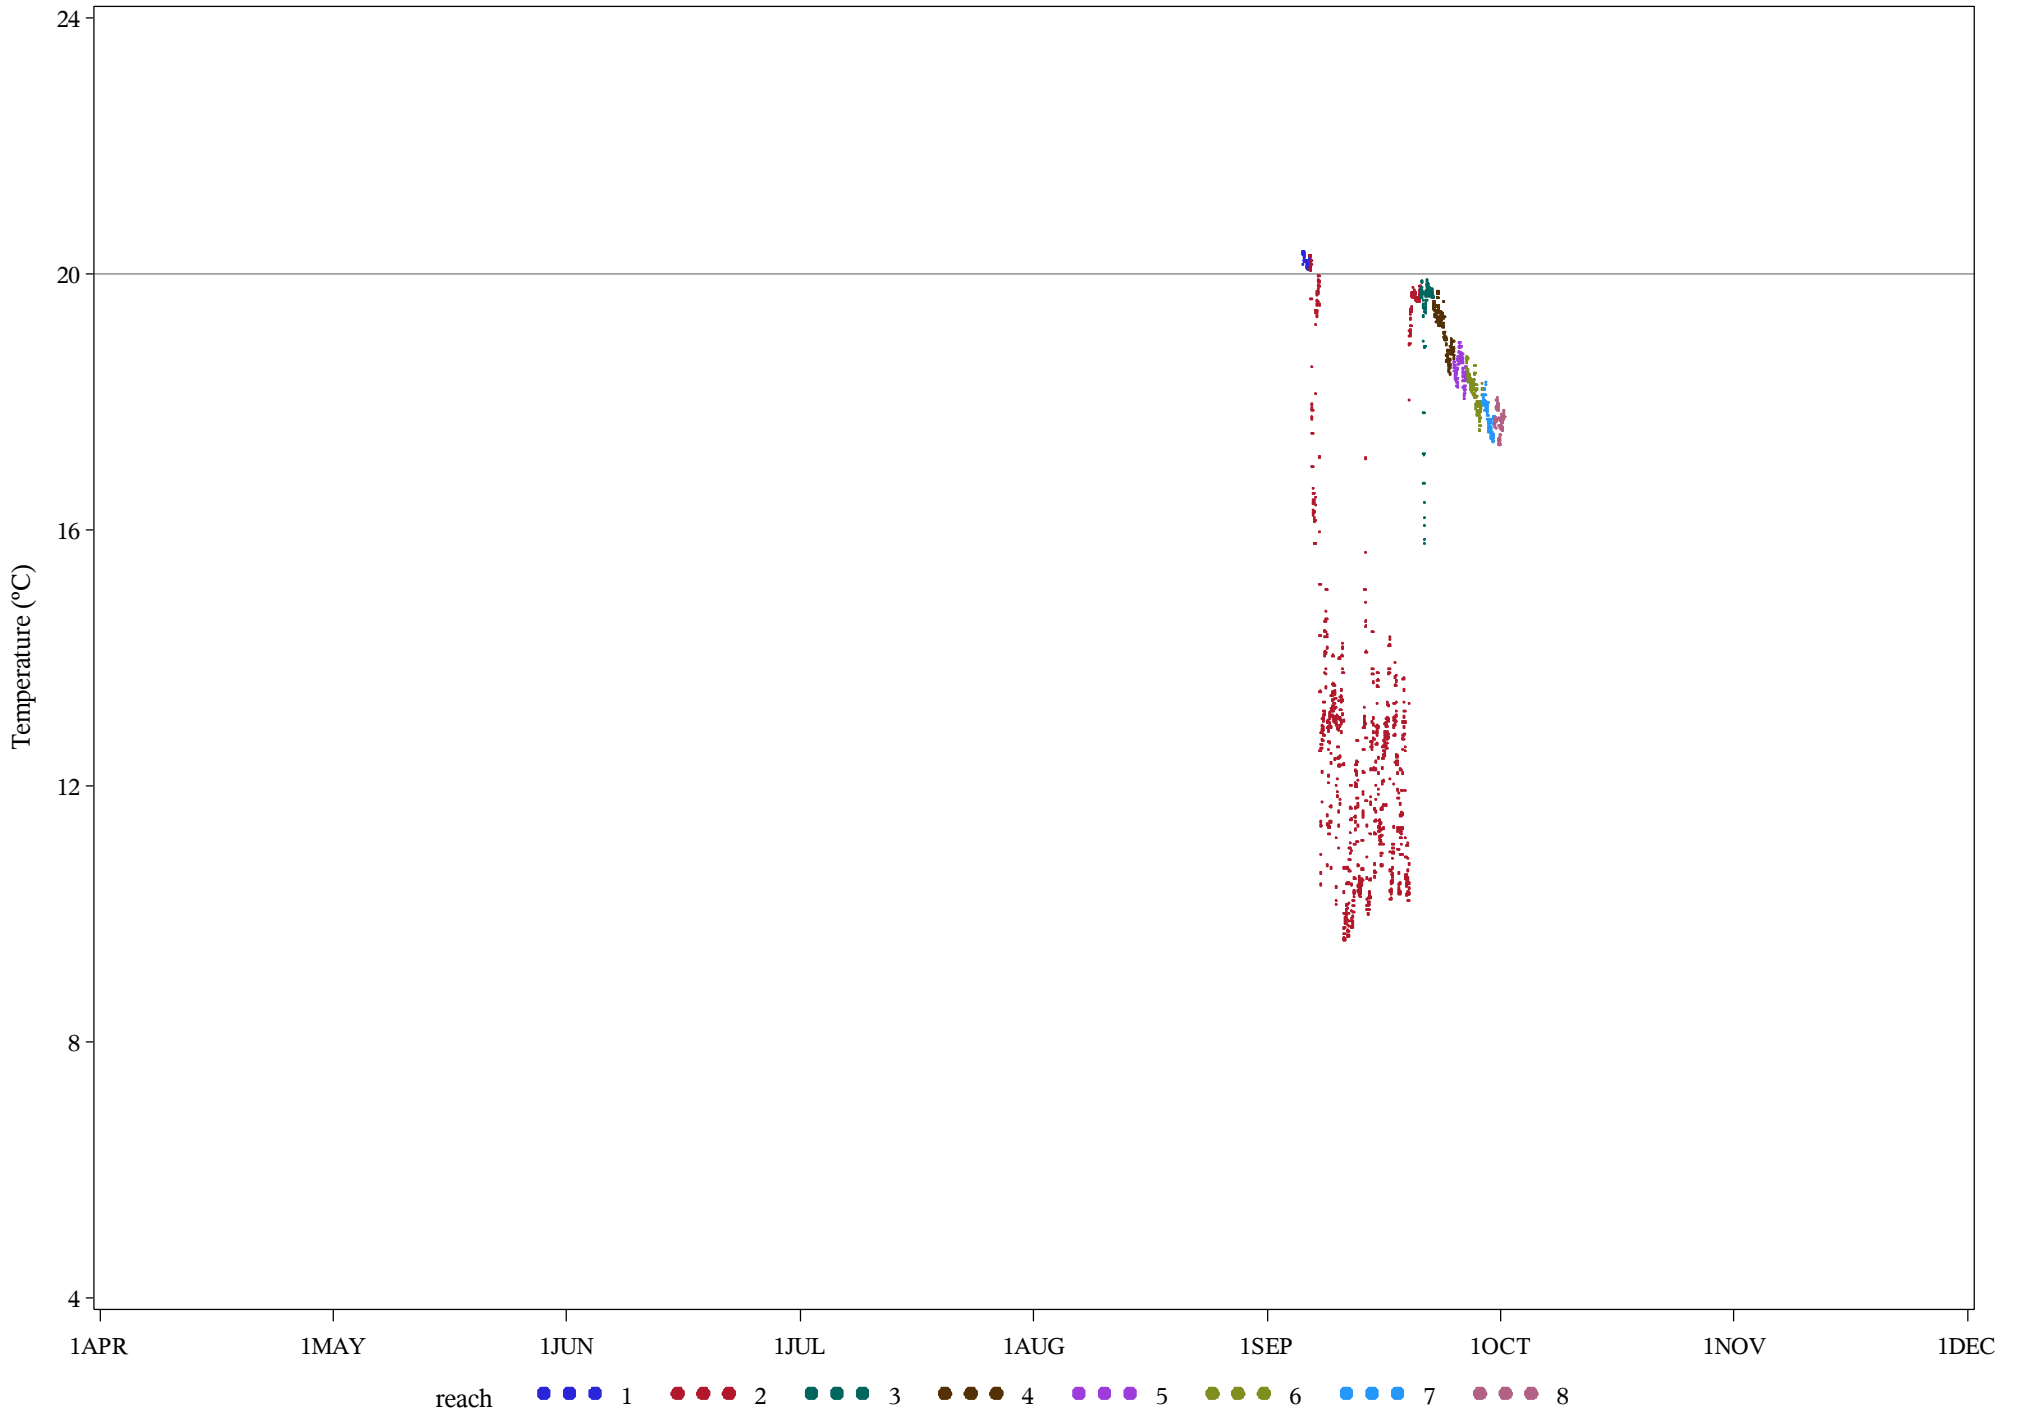



# Steelhead 3781B

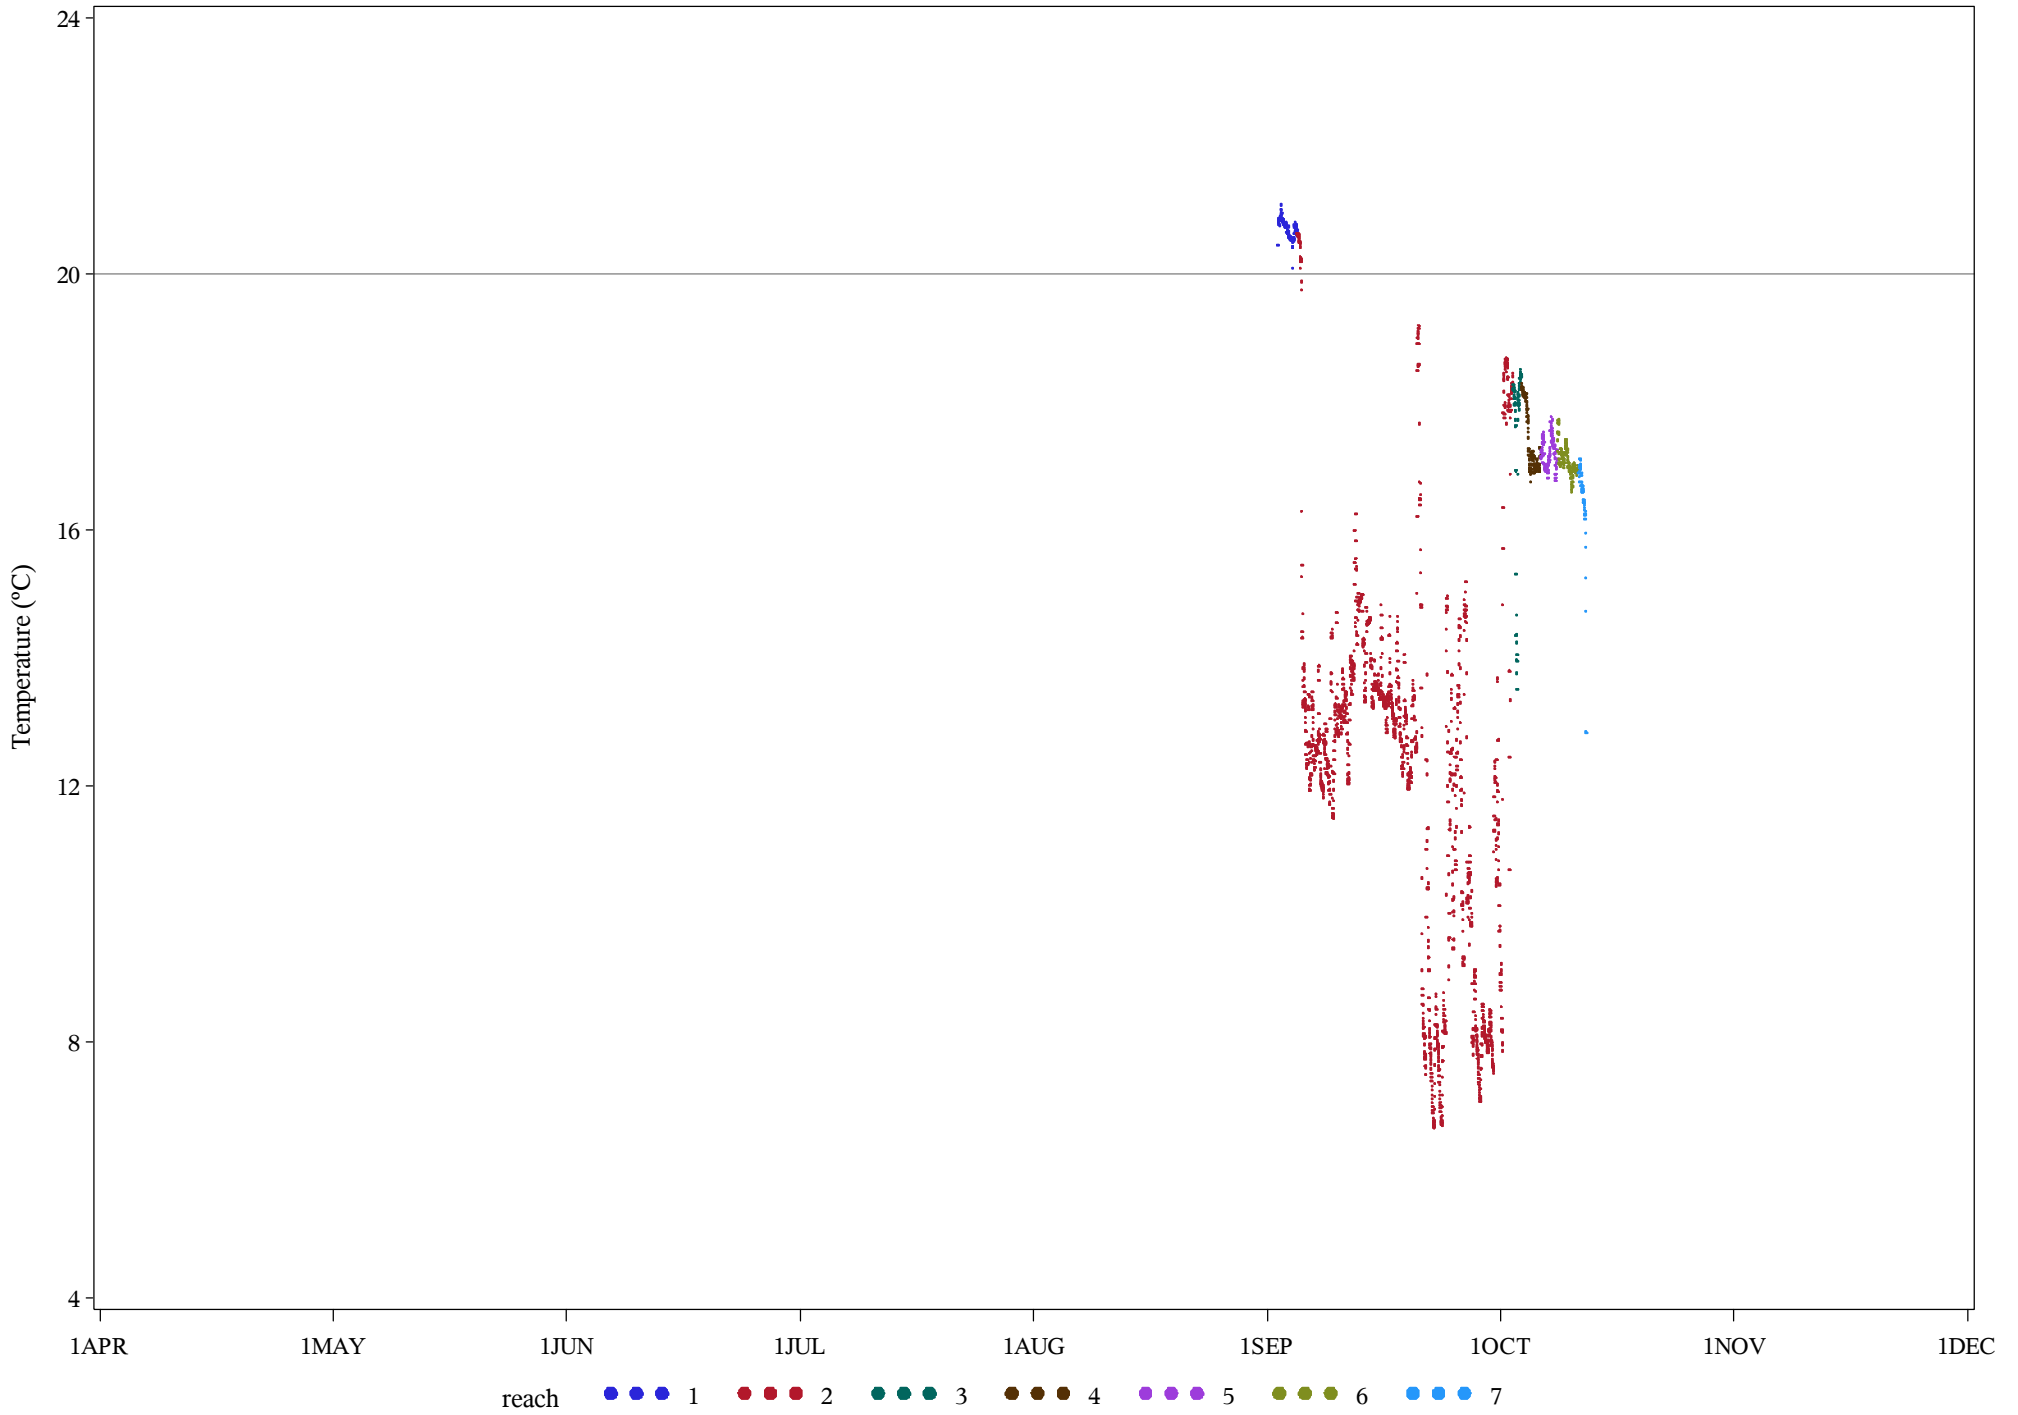





# Steelhead 3820B

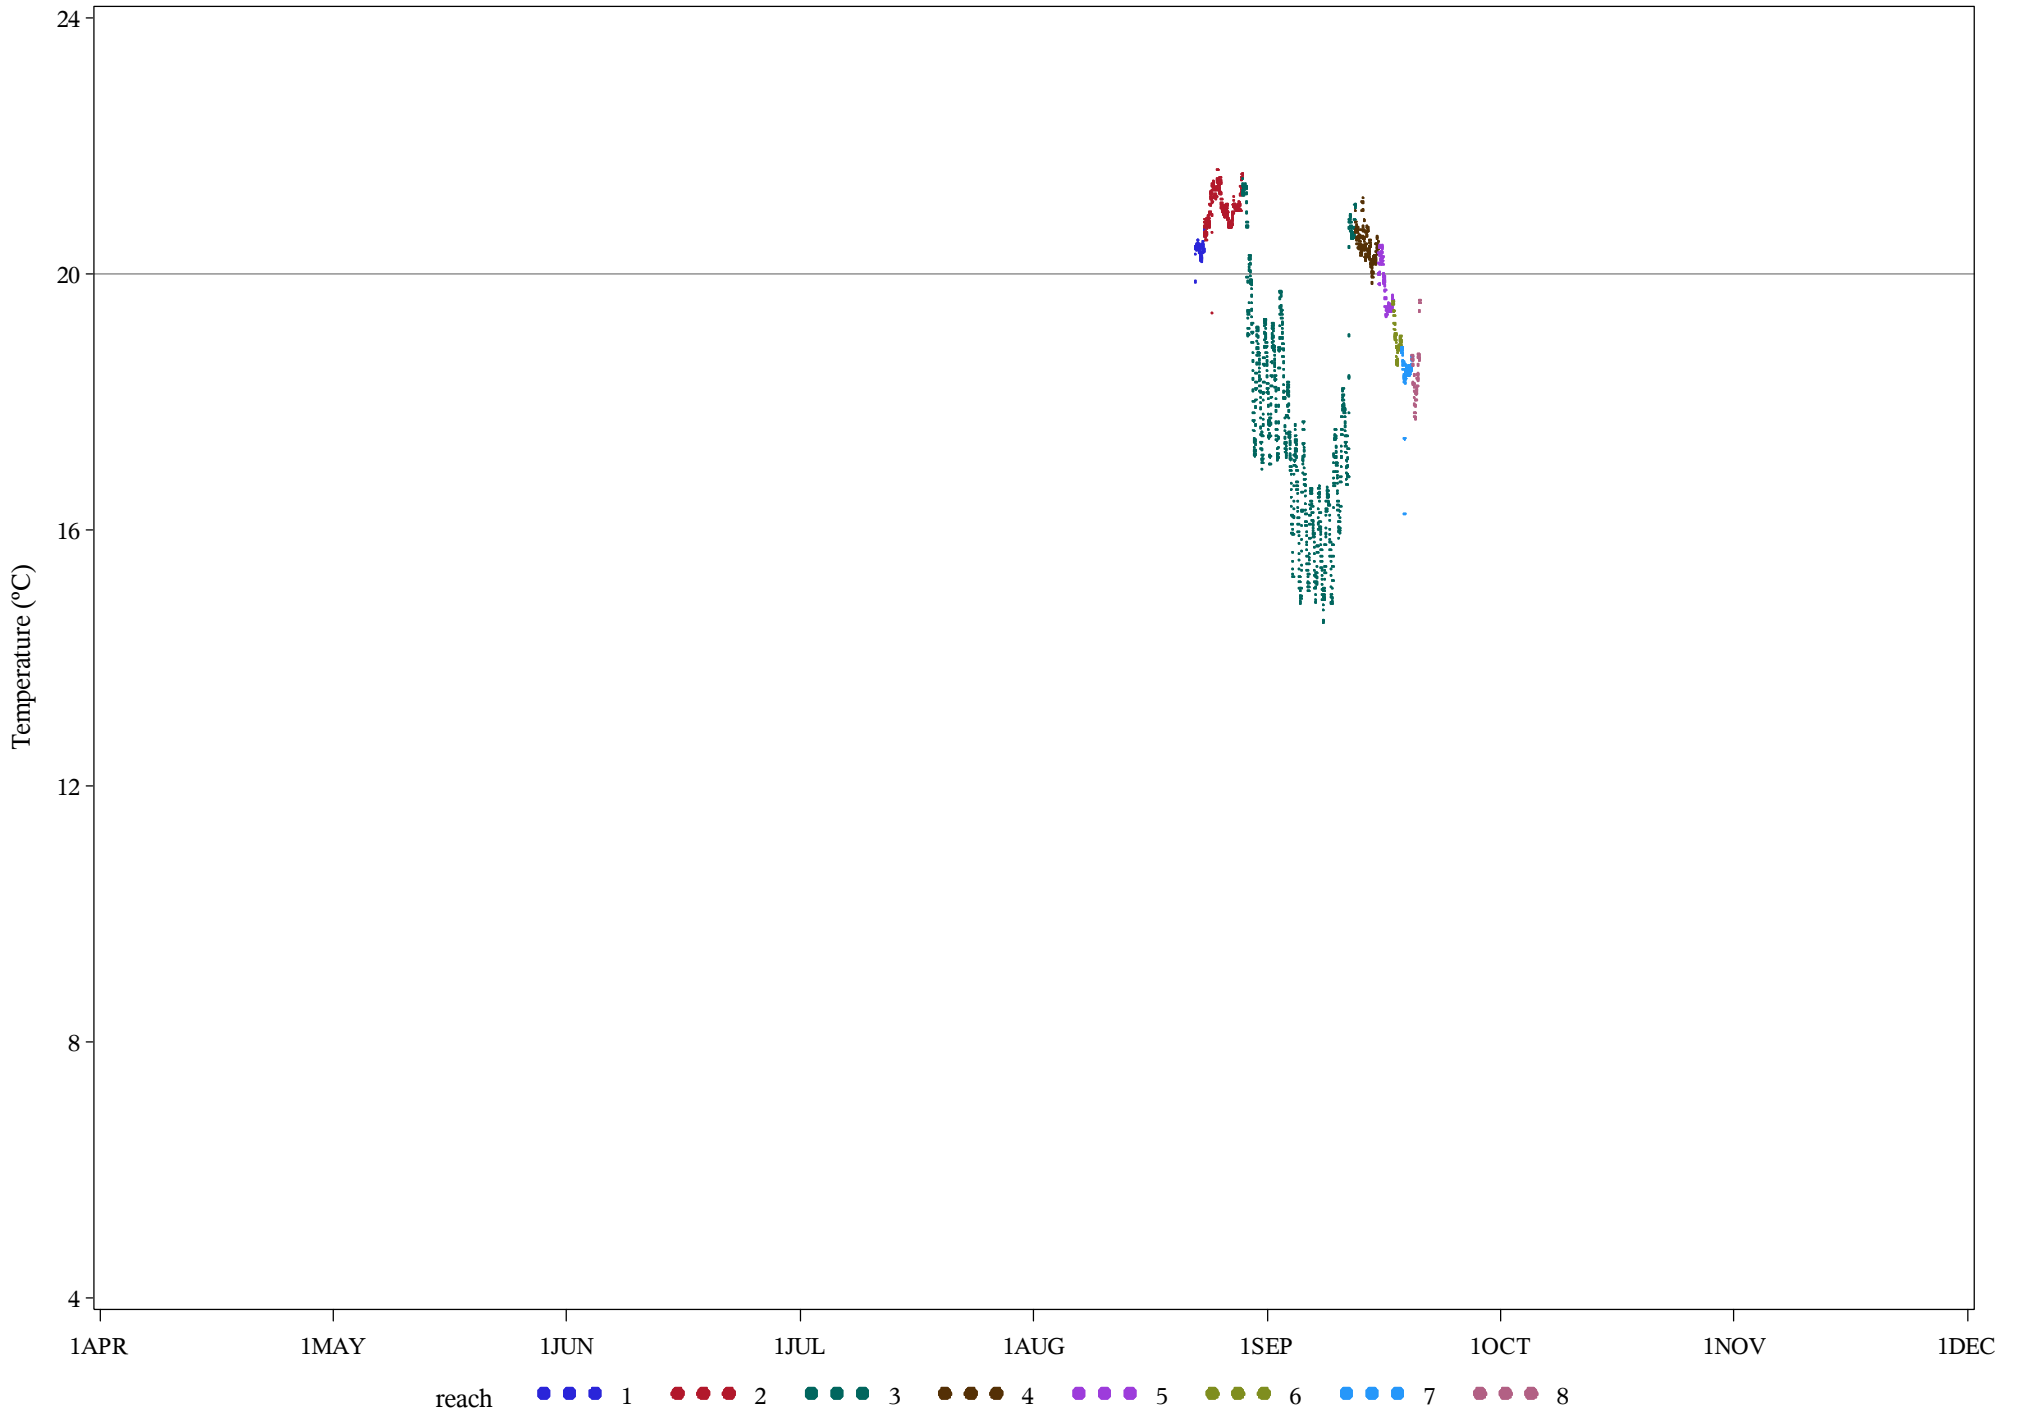

# Steelhead 3832B

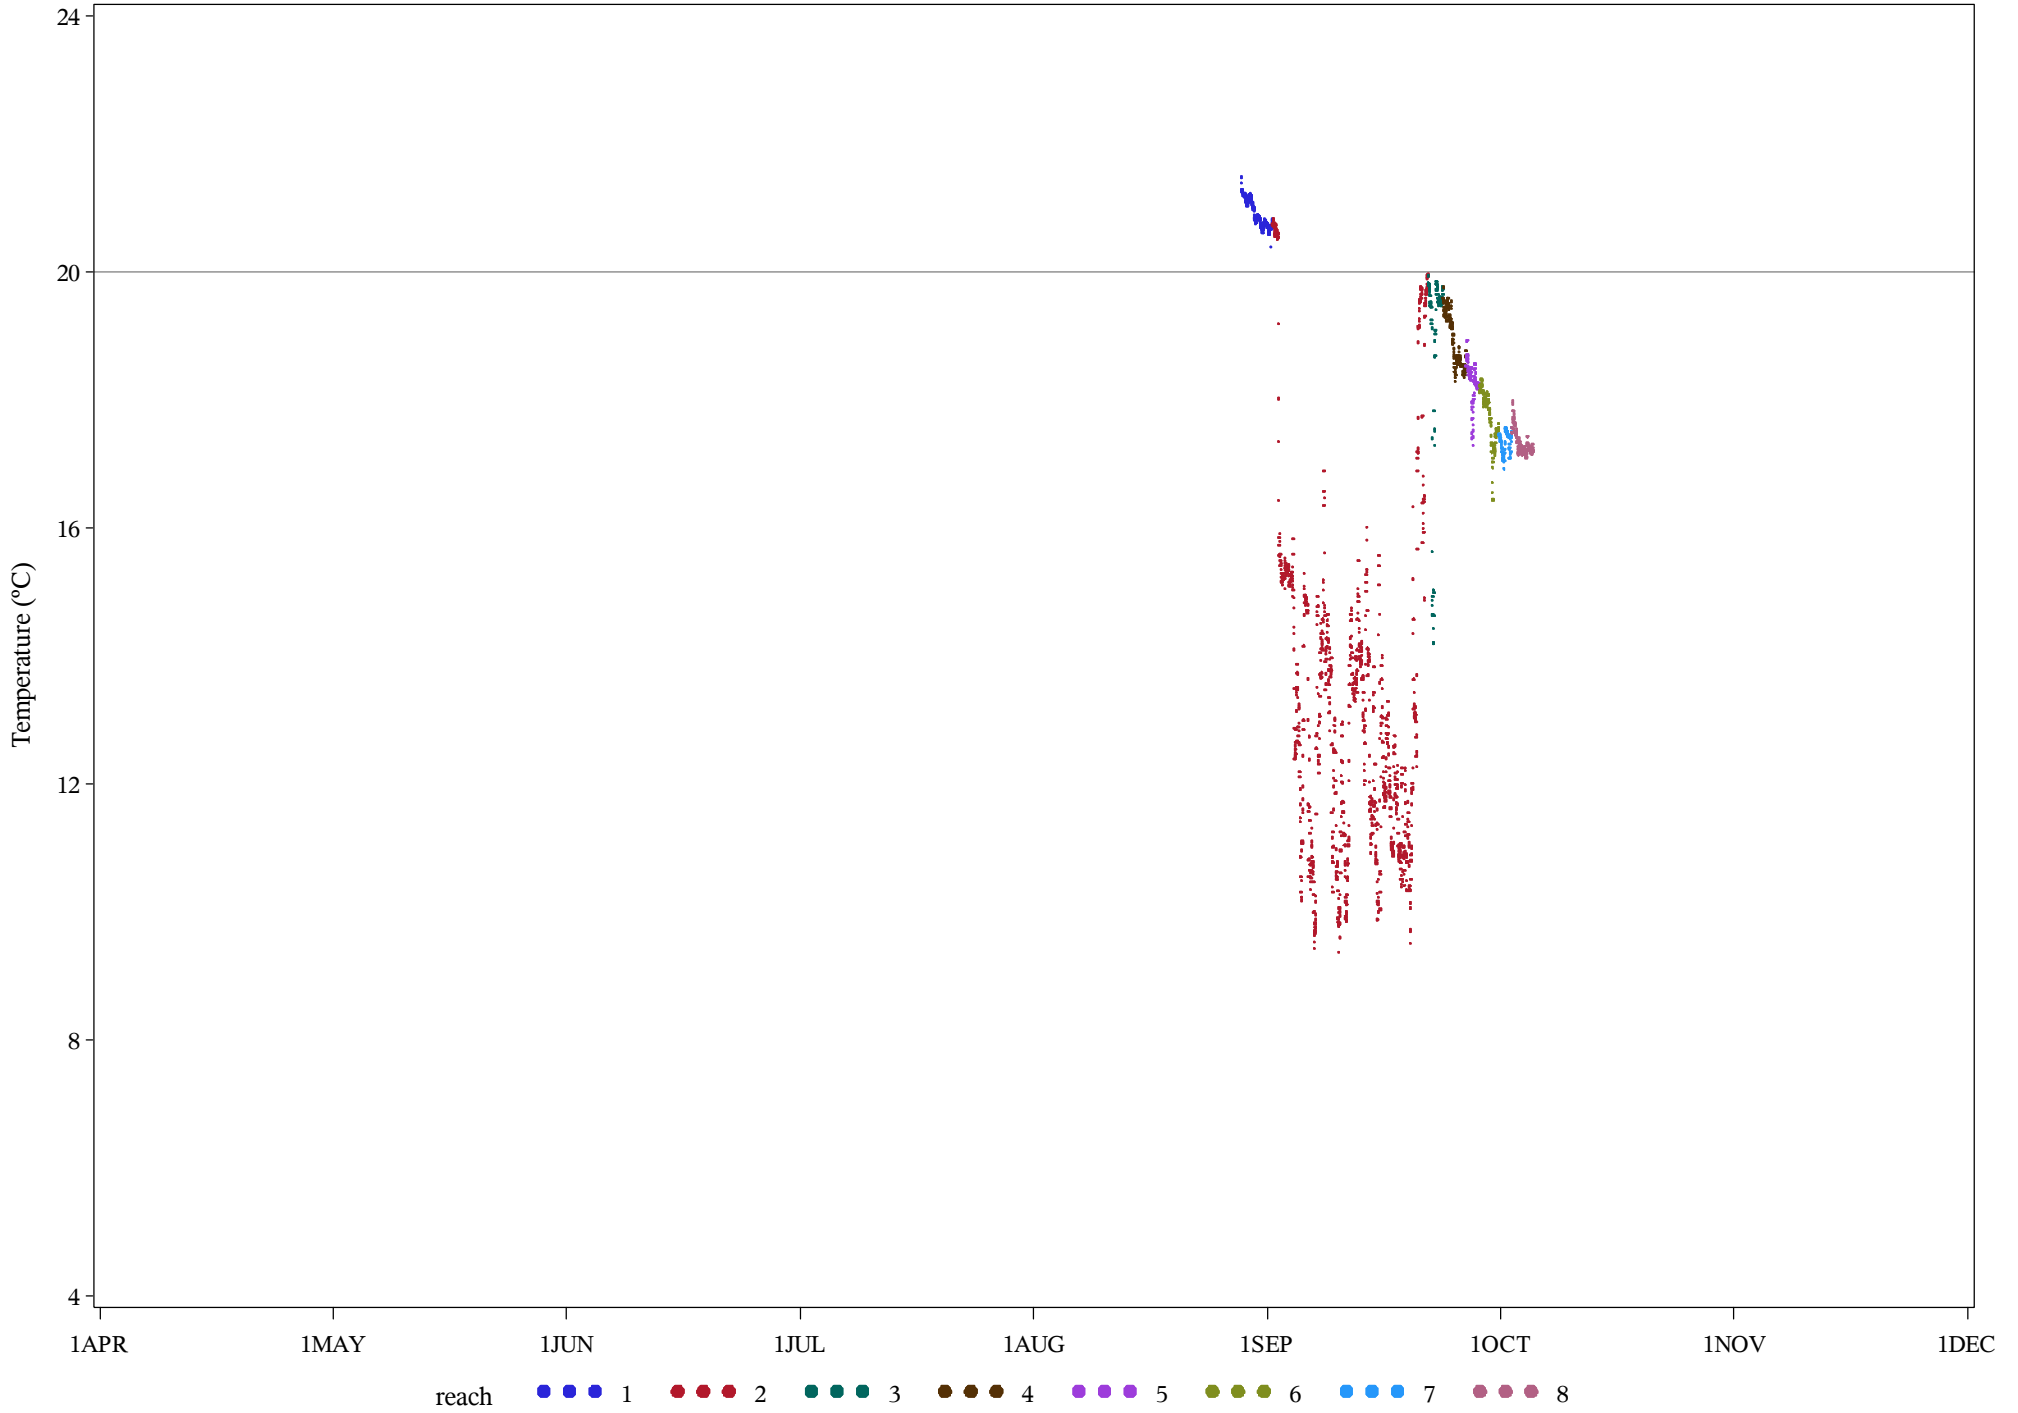



# Steelhead 3836B

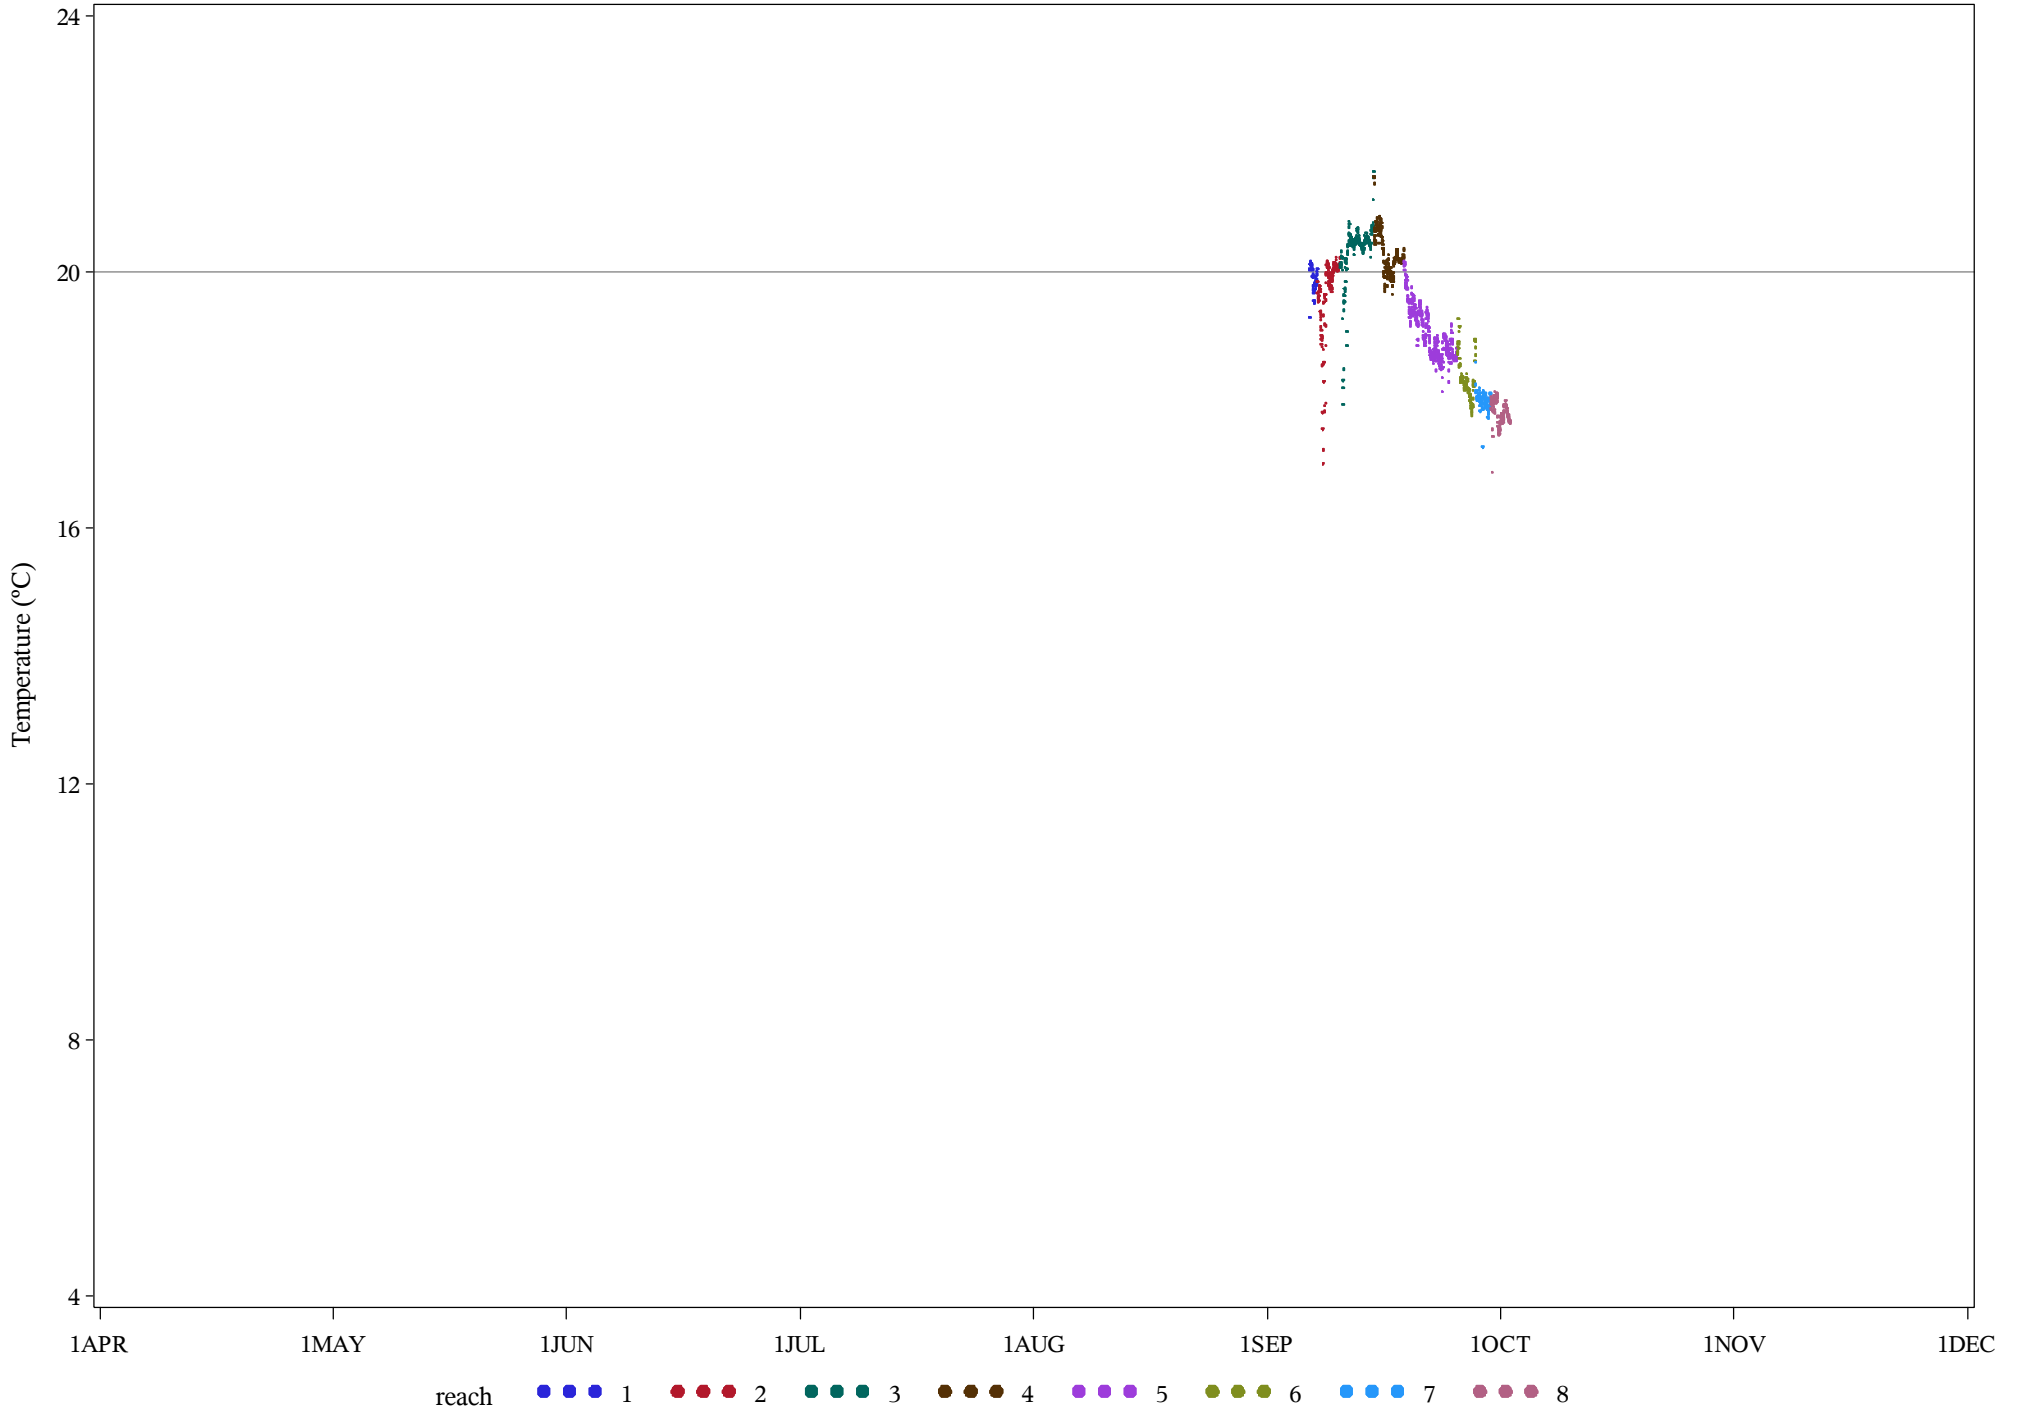

# Steelhead 3845B

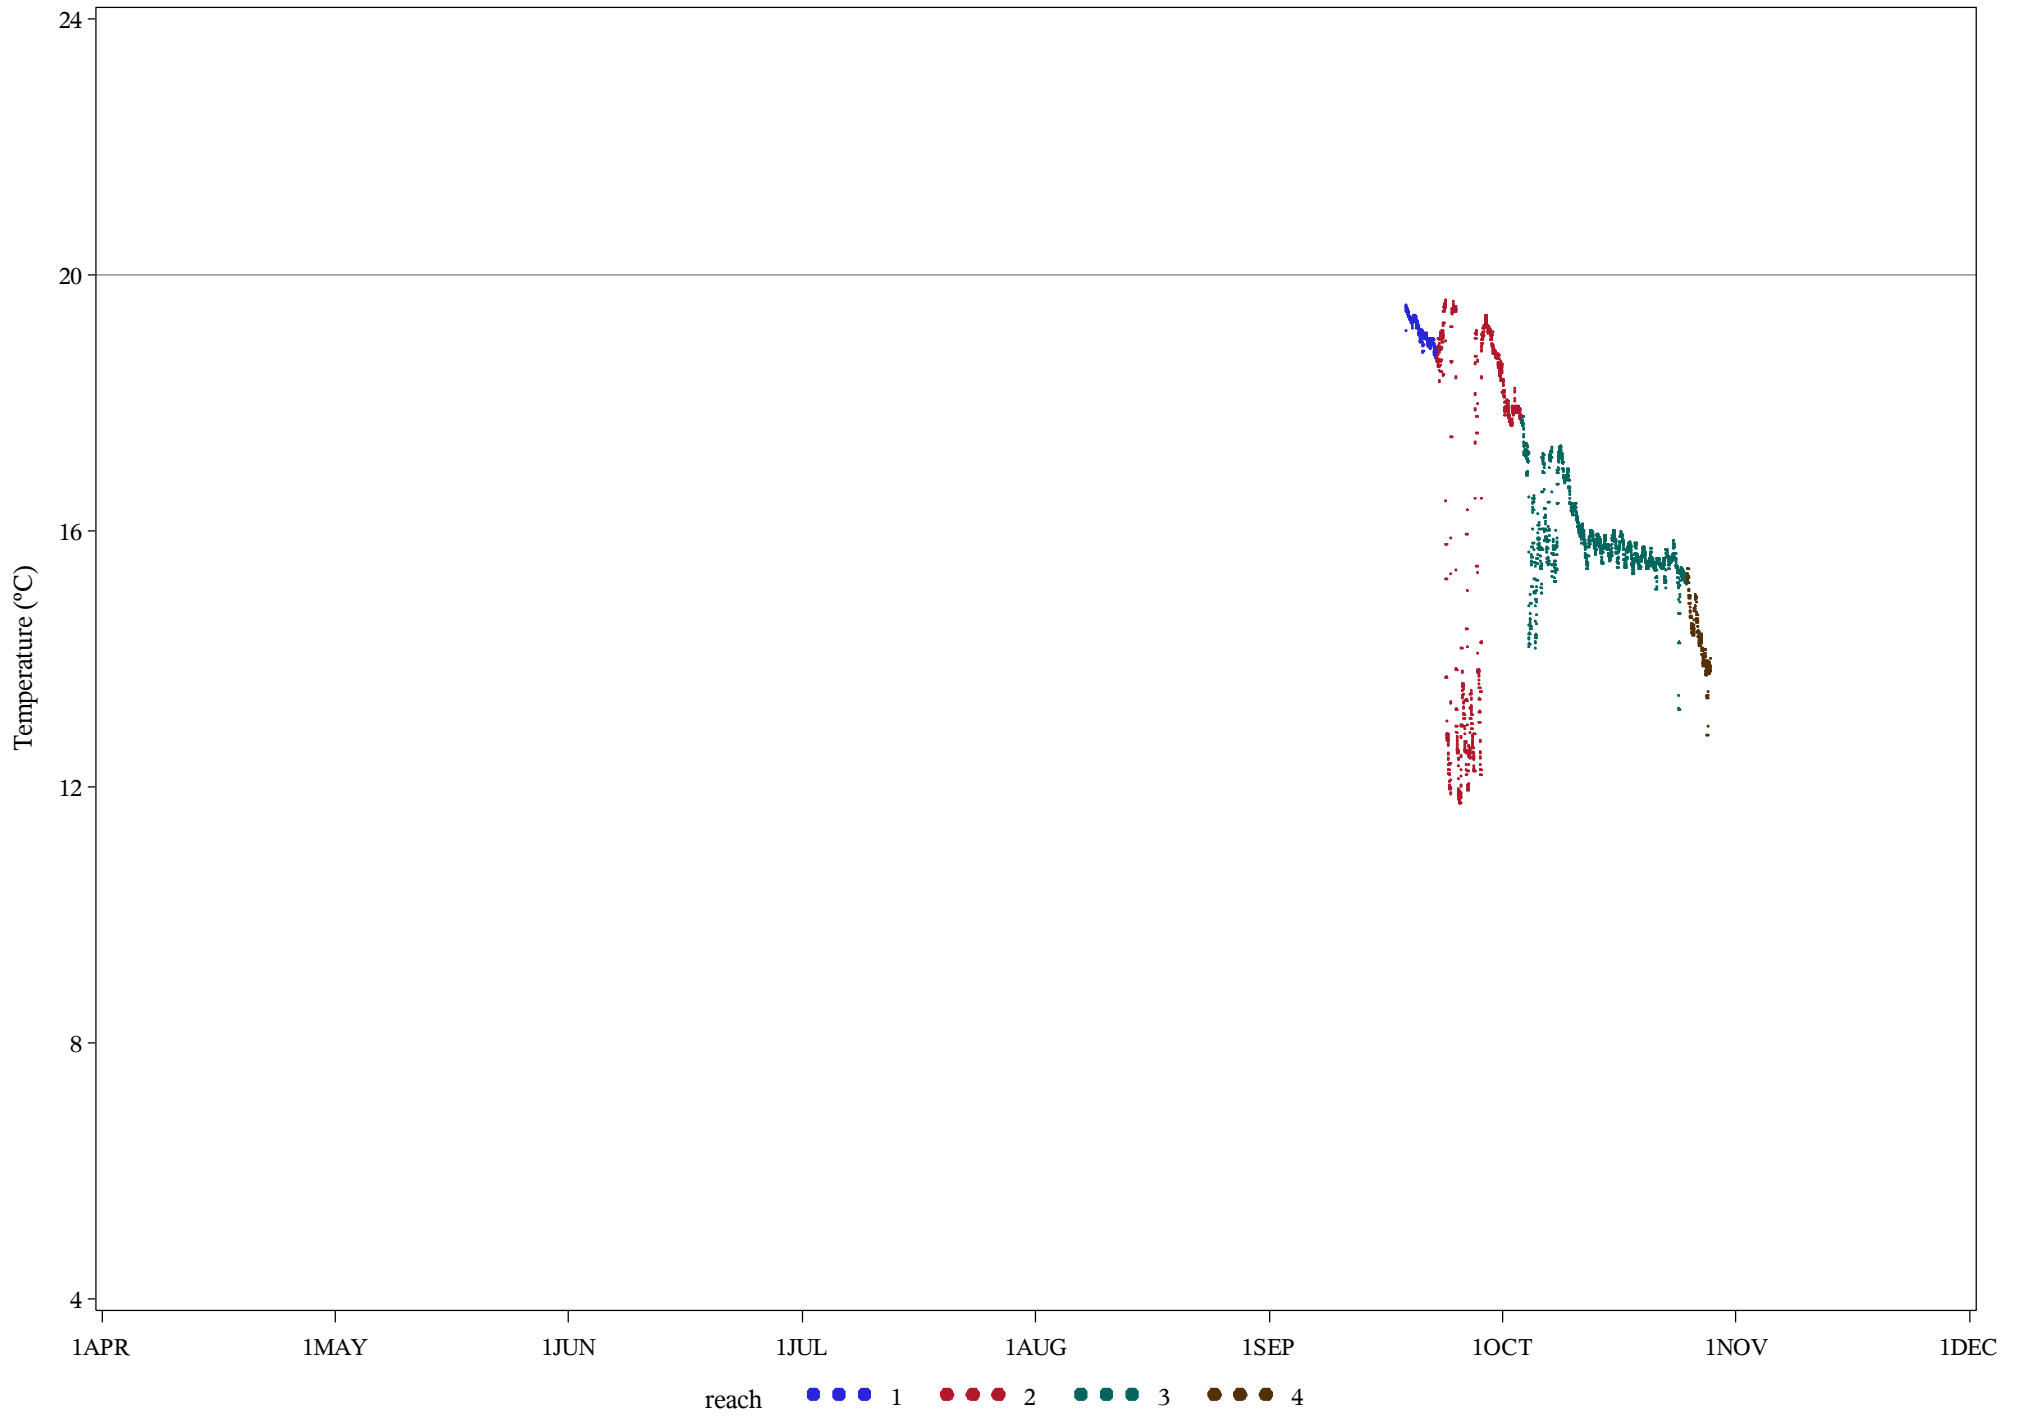

Steelhead  
3858A

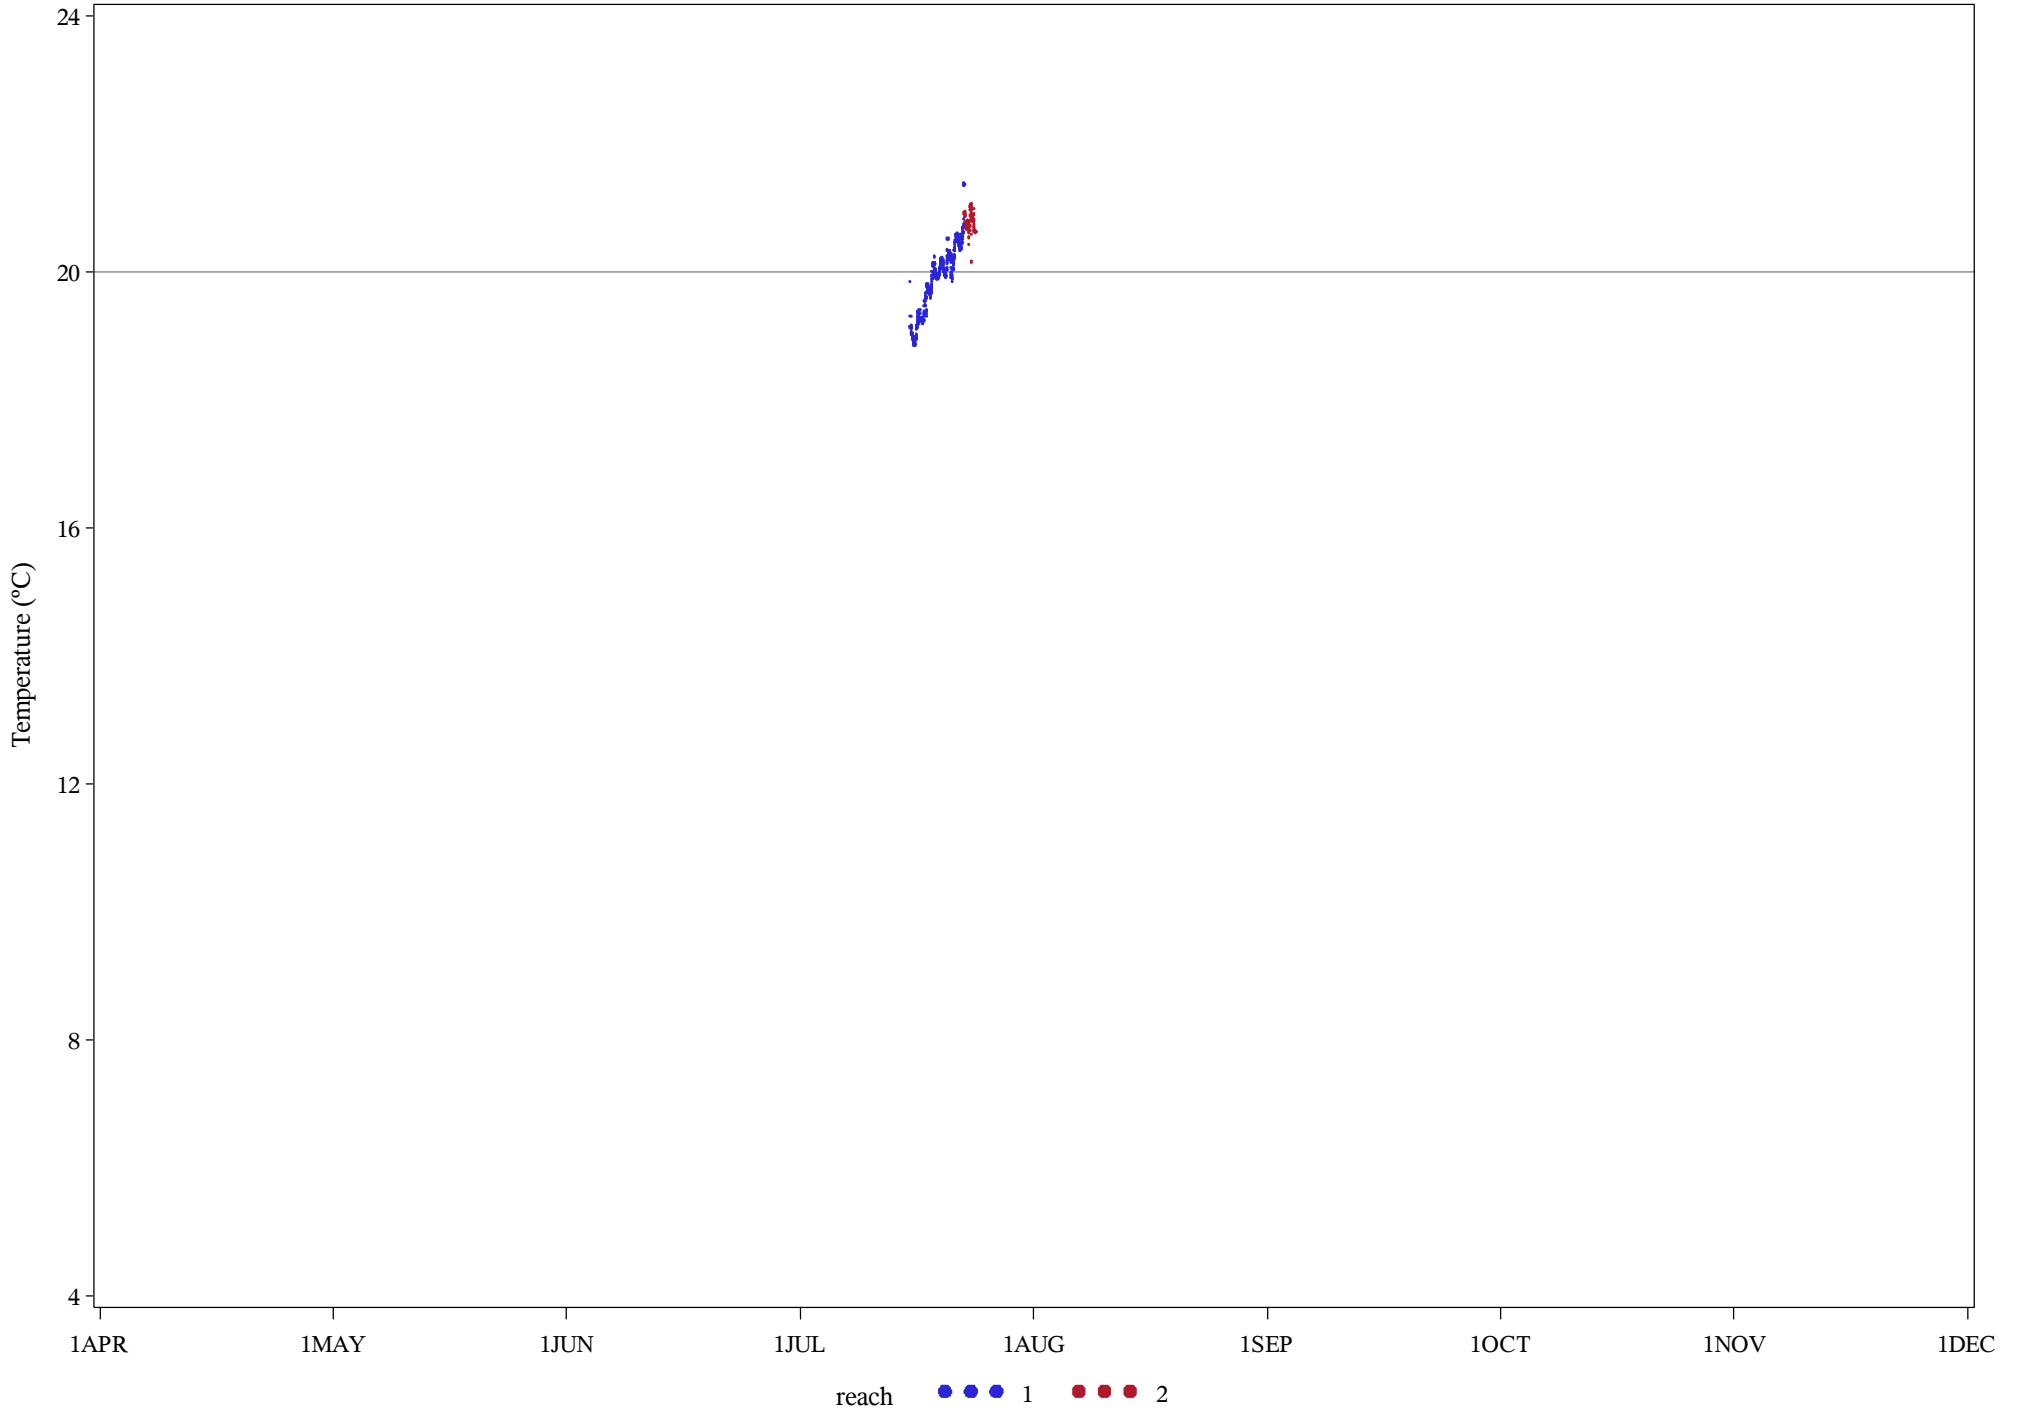

Steelhead  
3858B

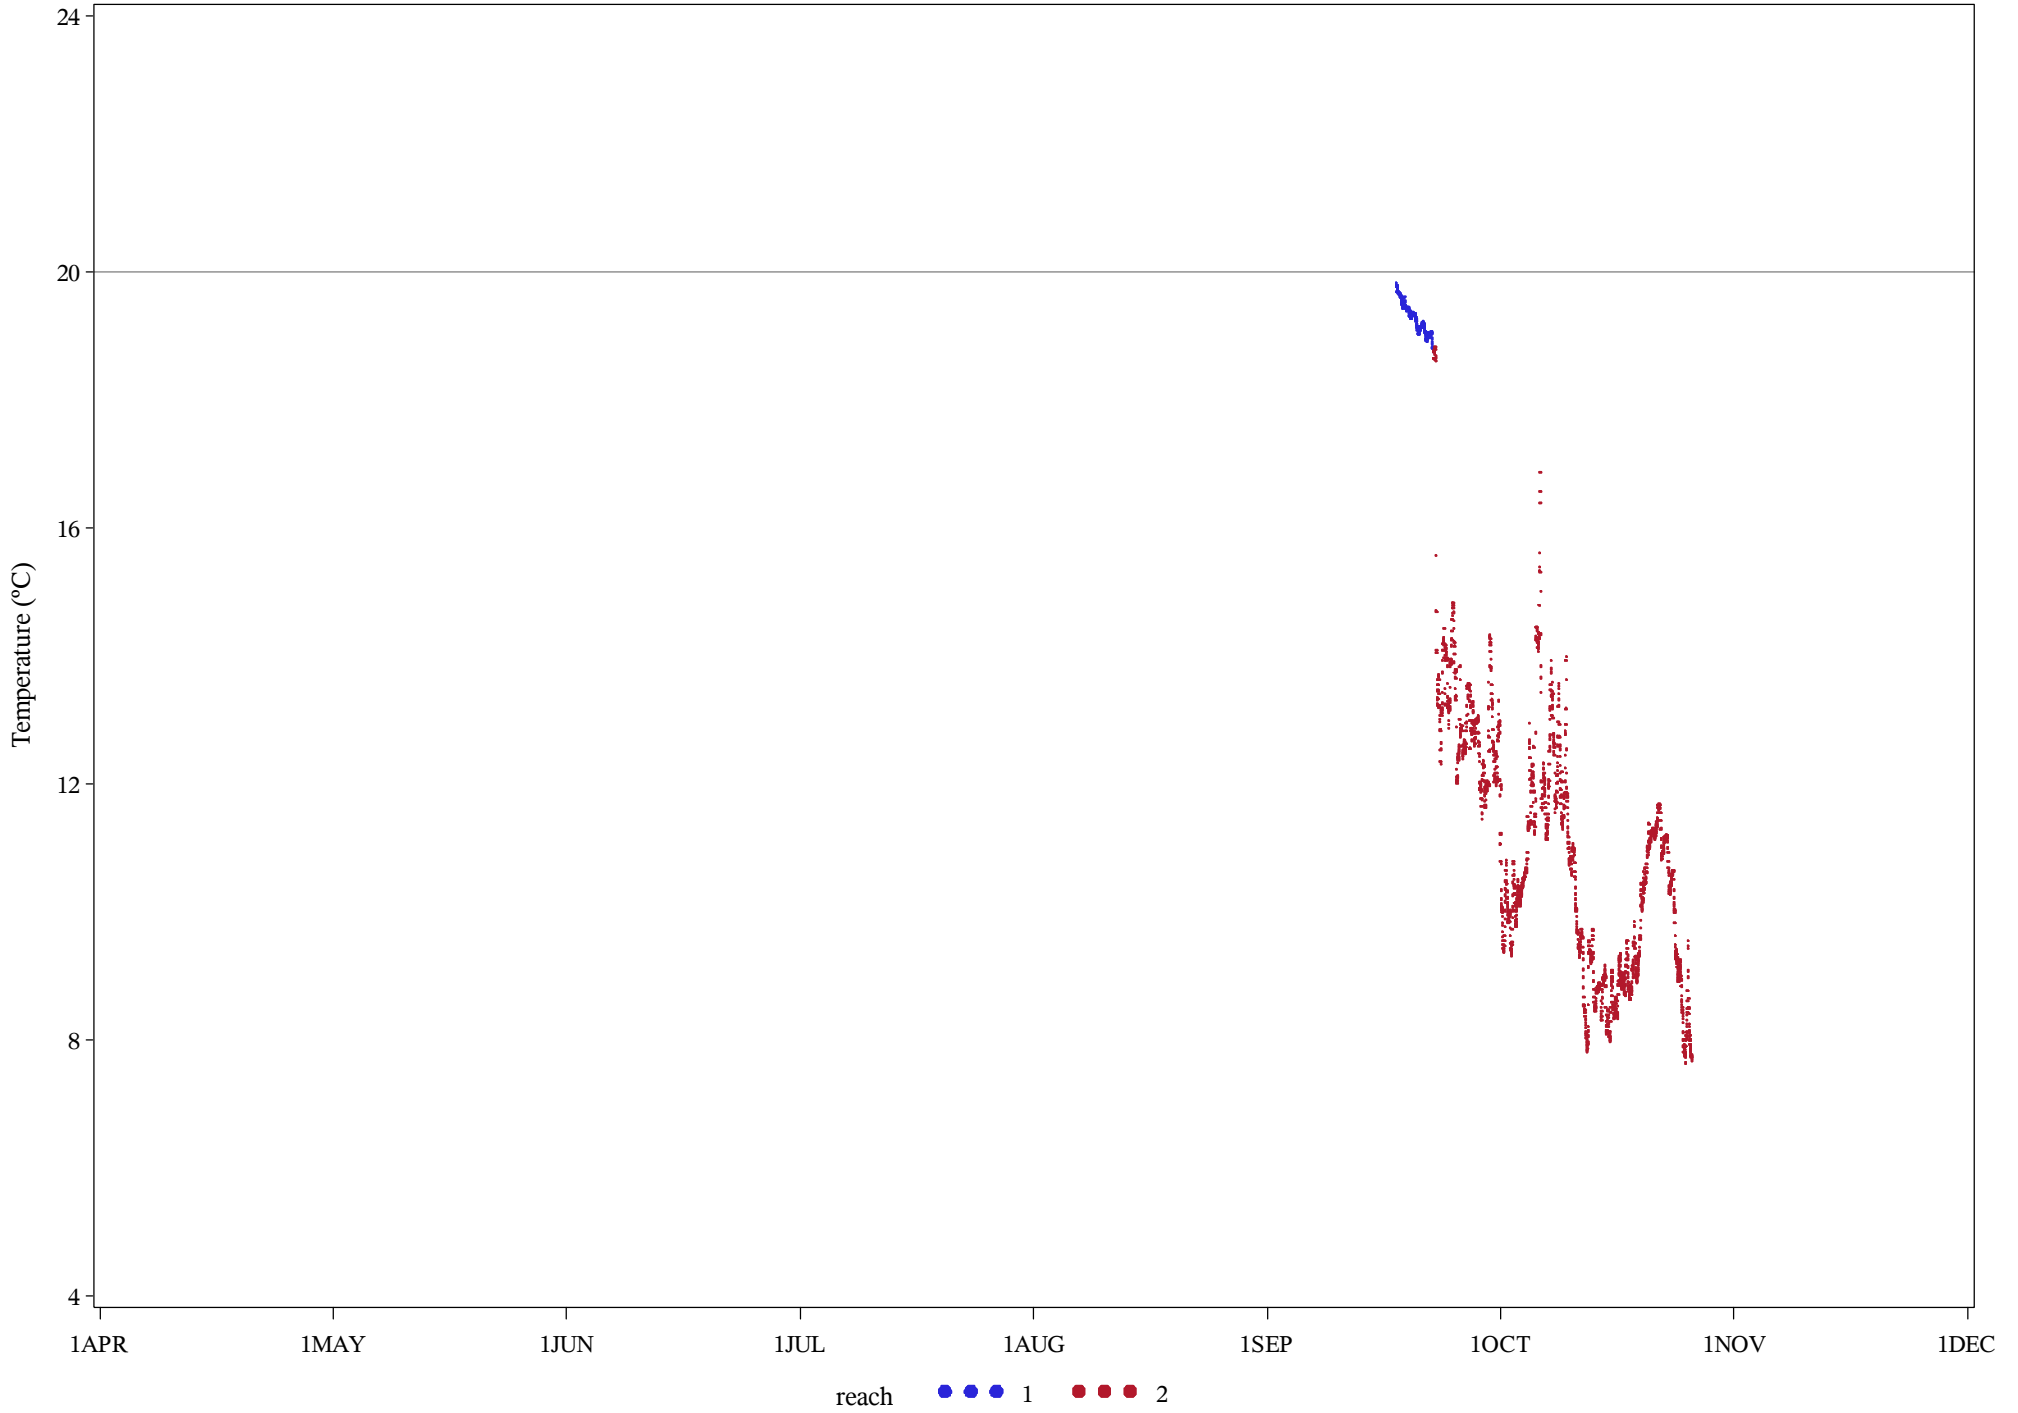

# Steelhead 3870B

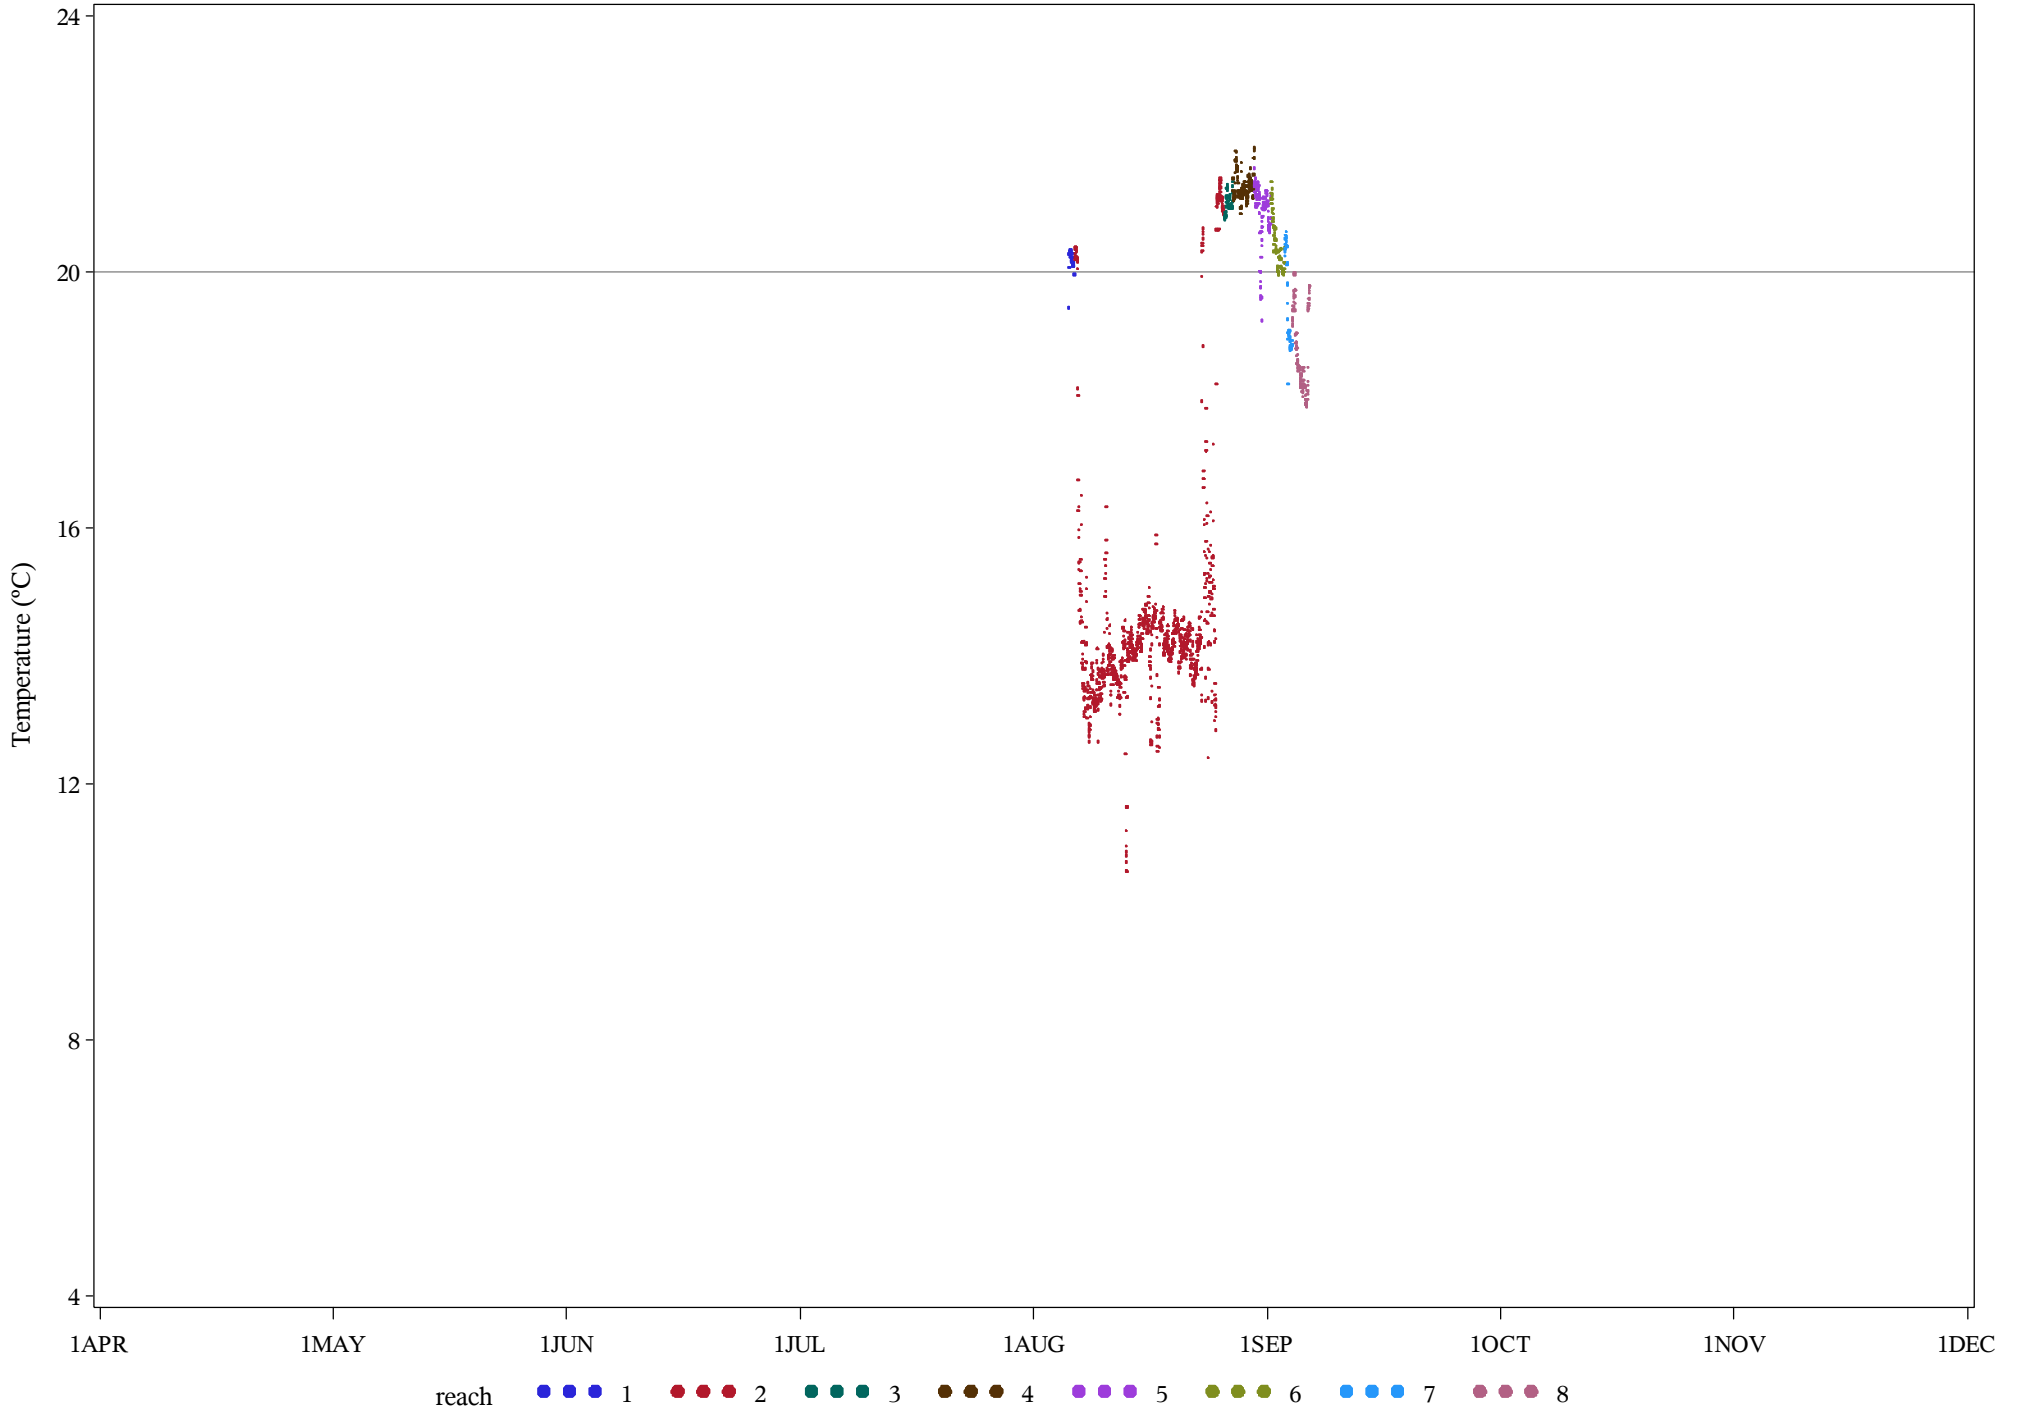

# Steelhead 4579A

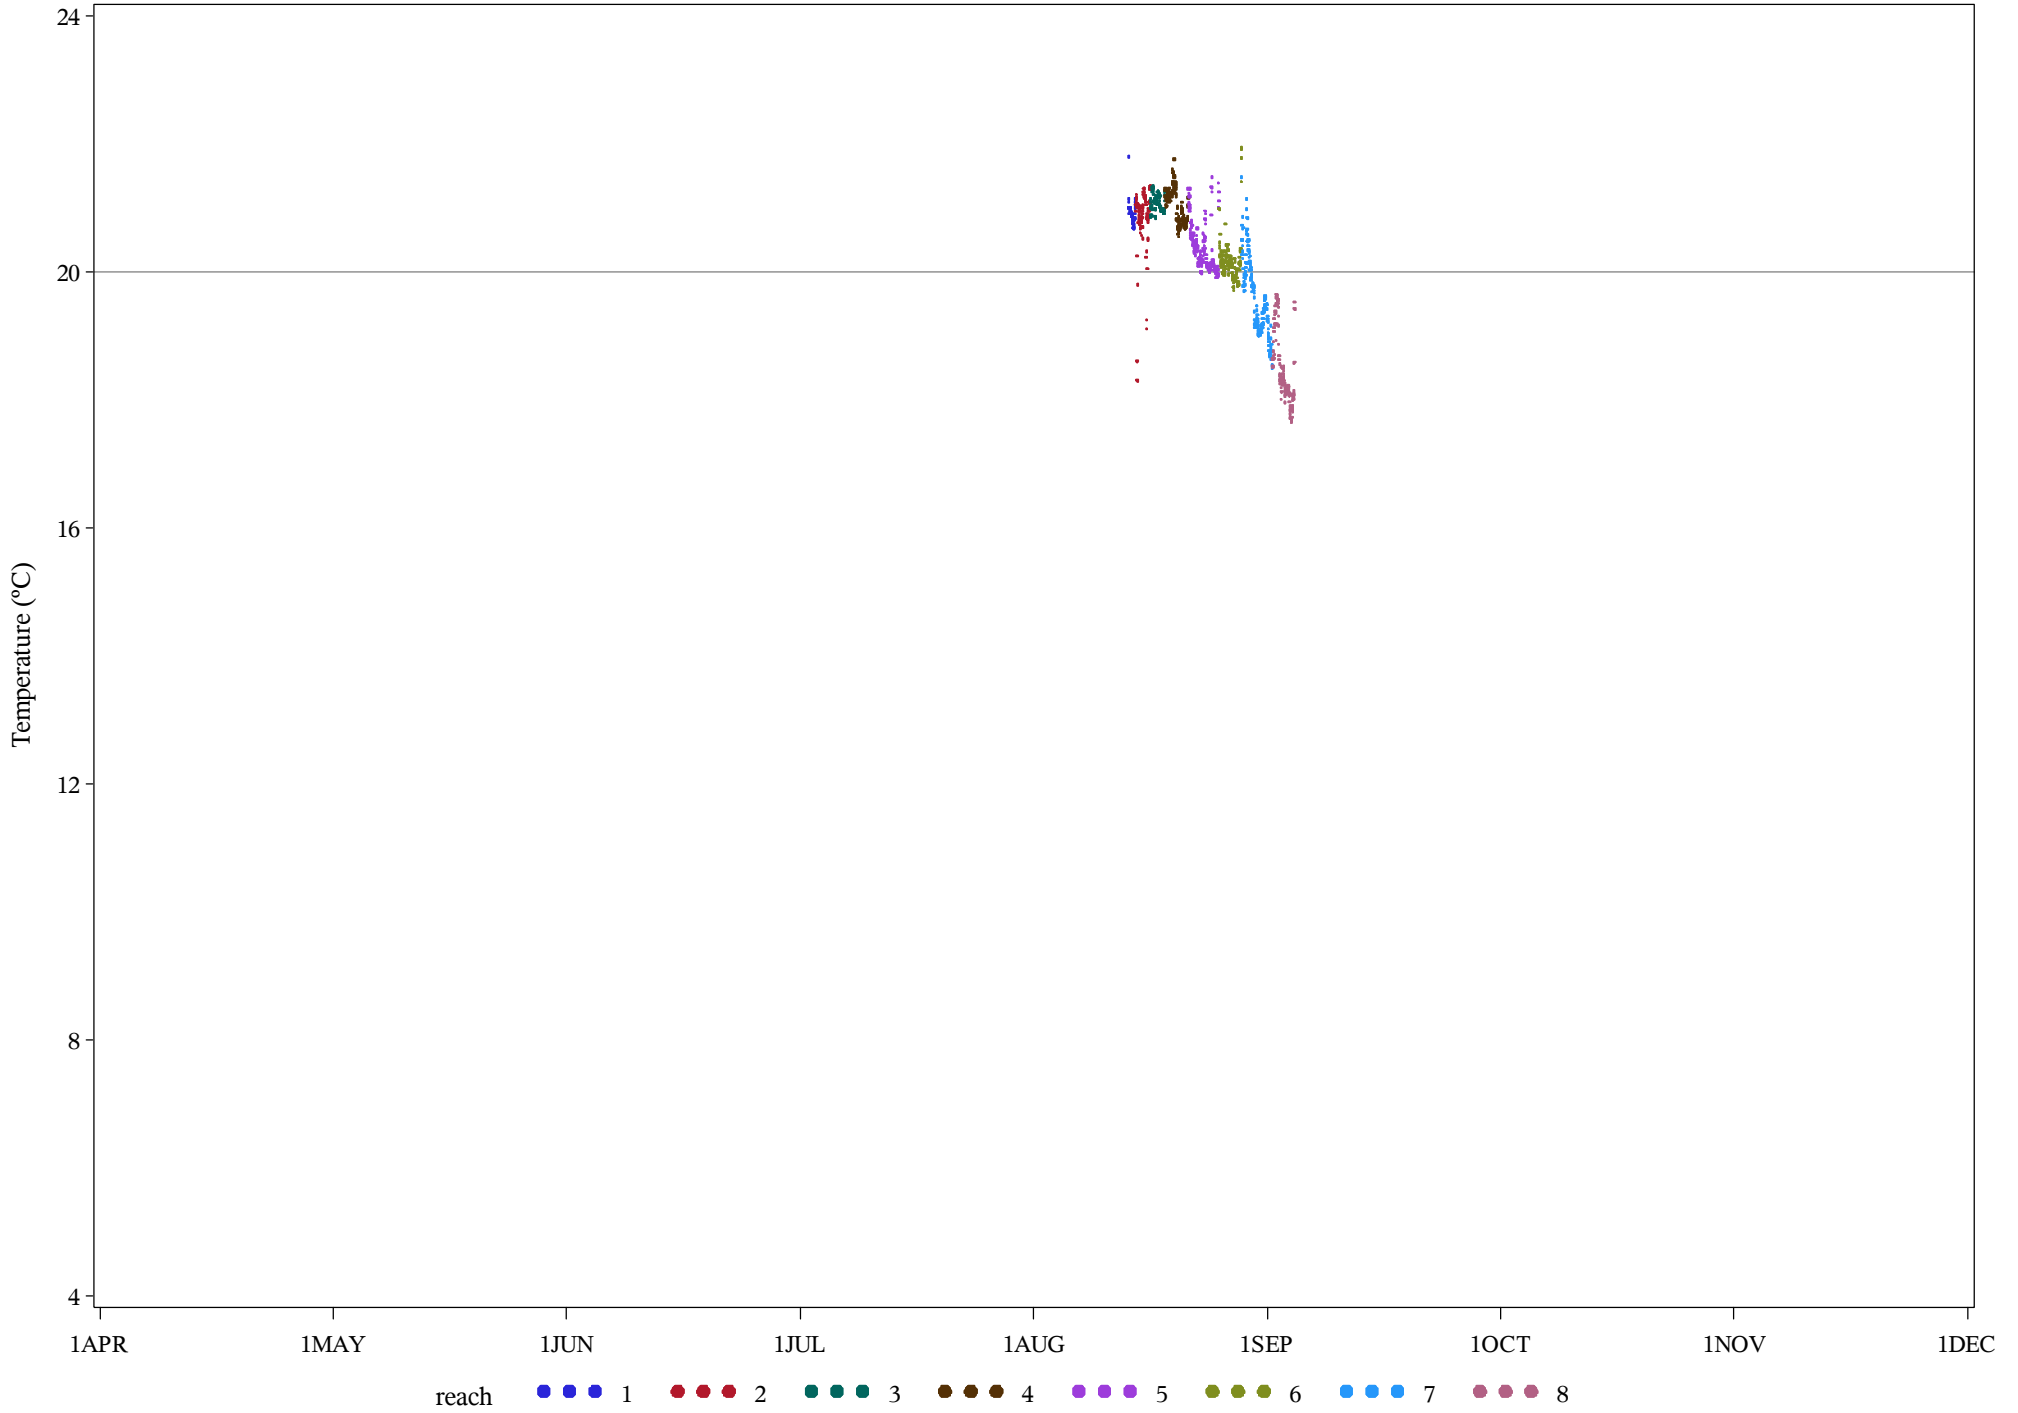

Steelhead  
4590A

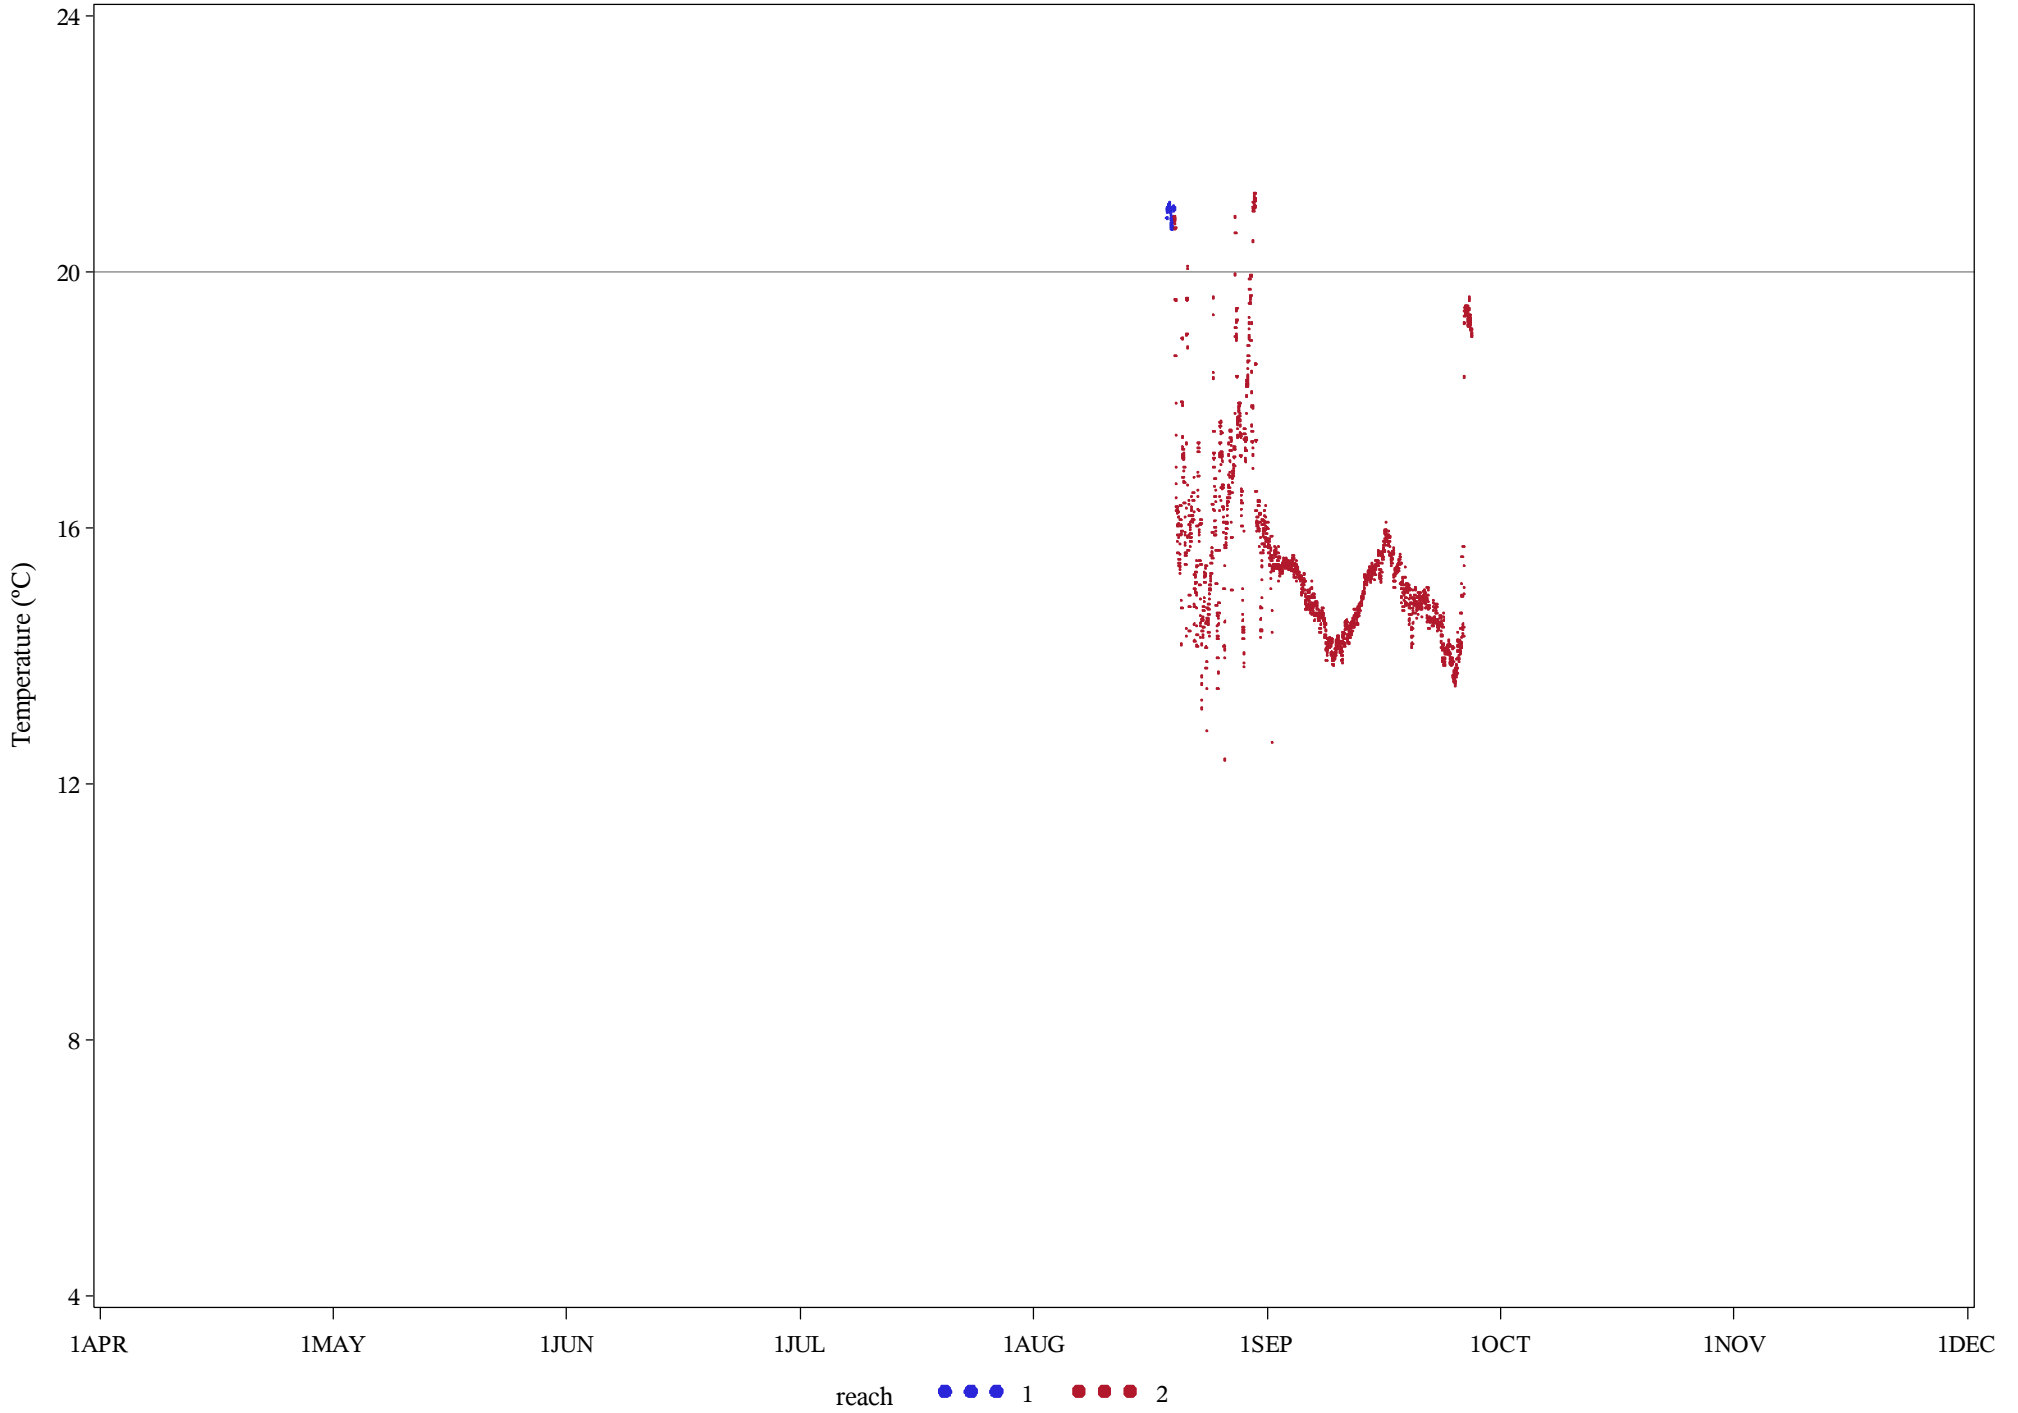

Steelhead  
4594A

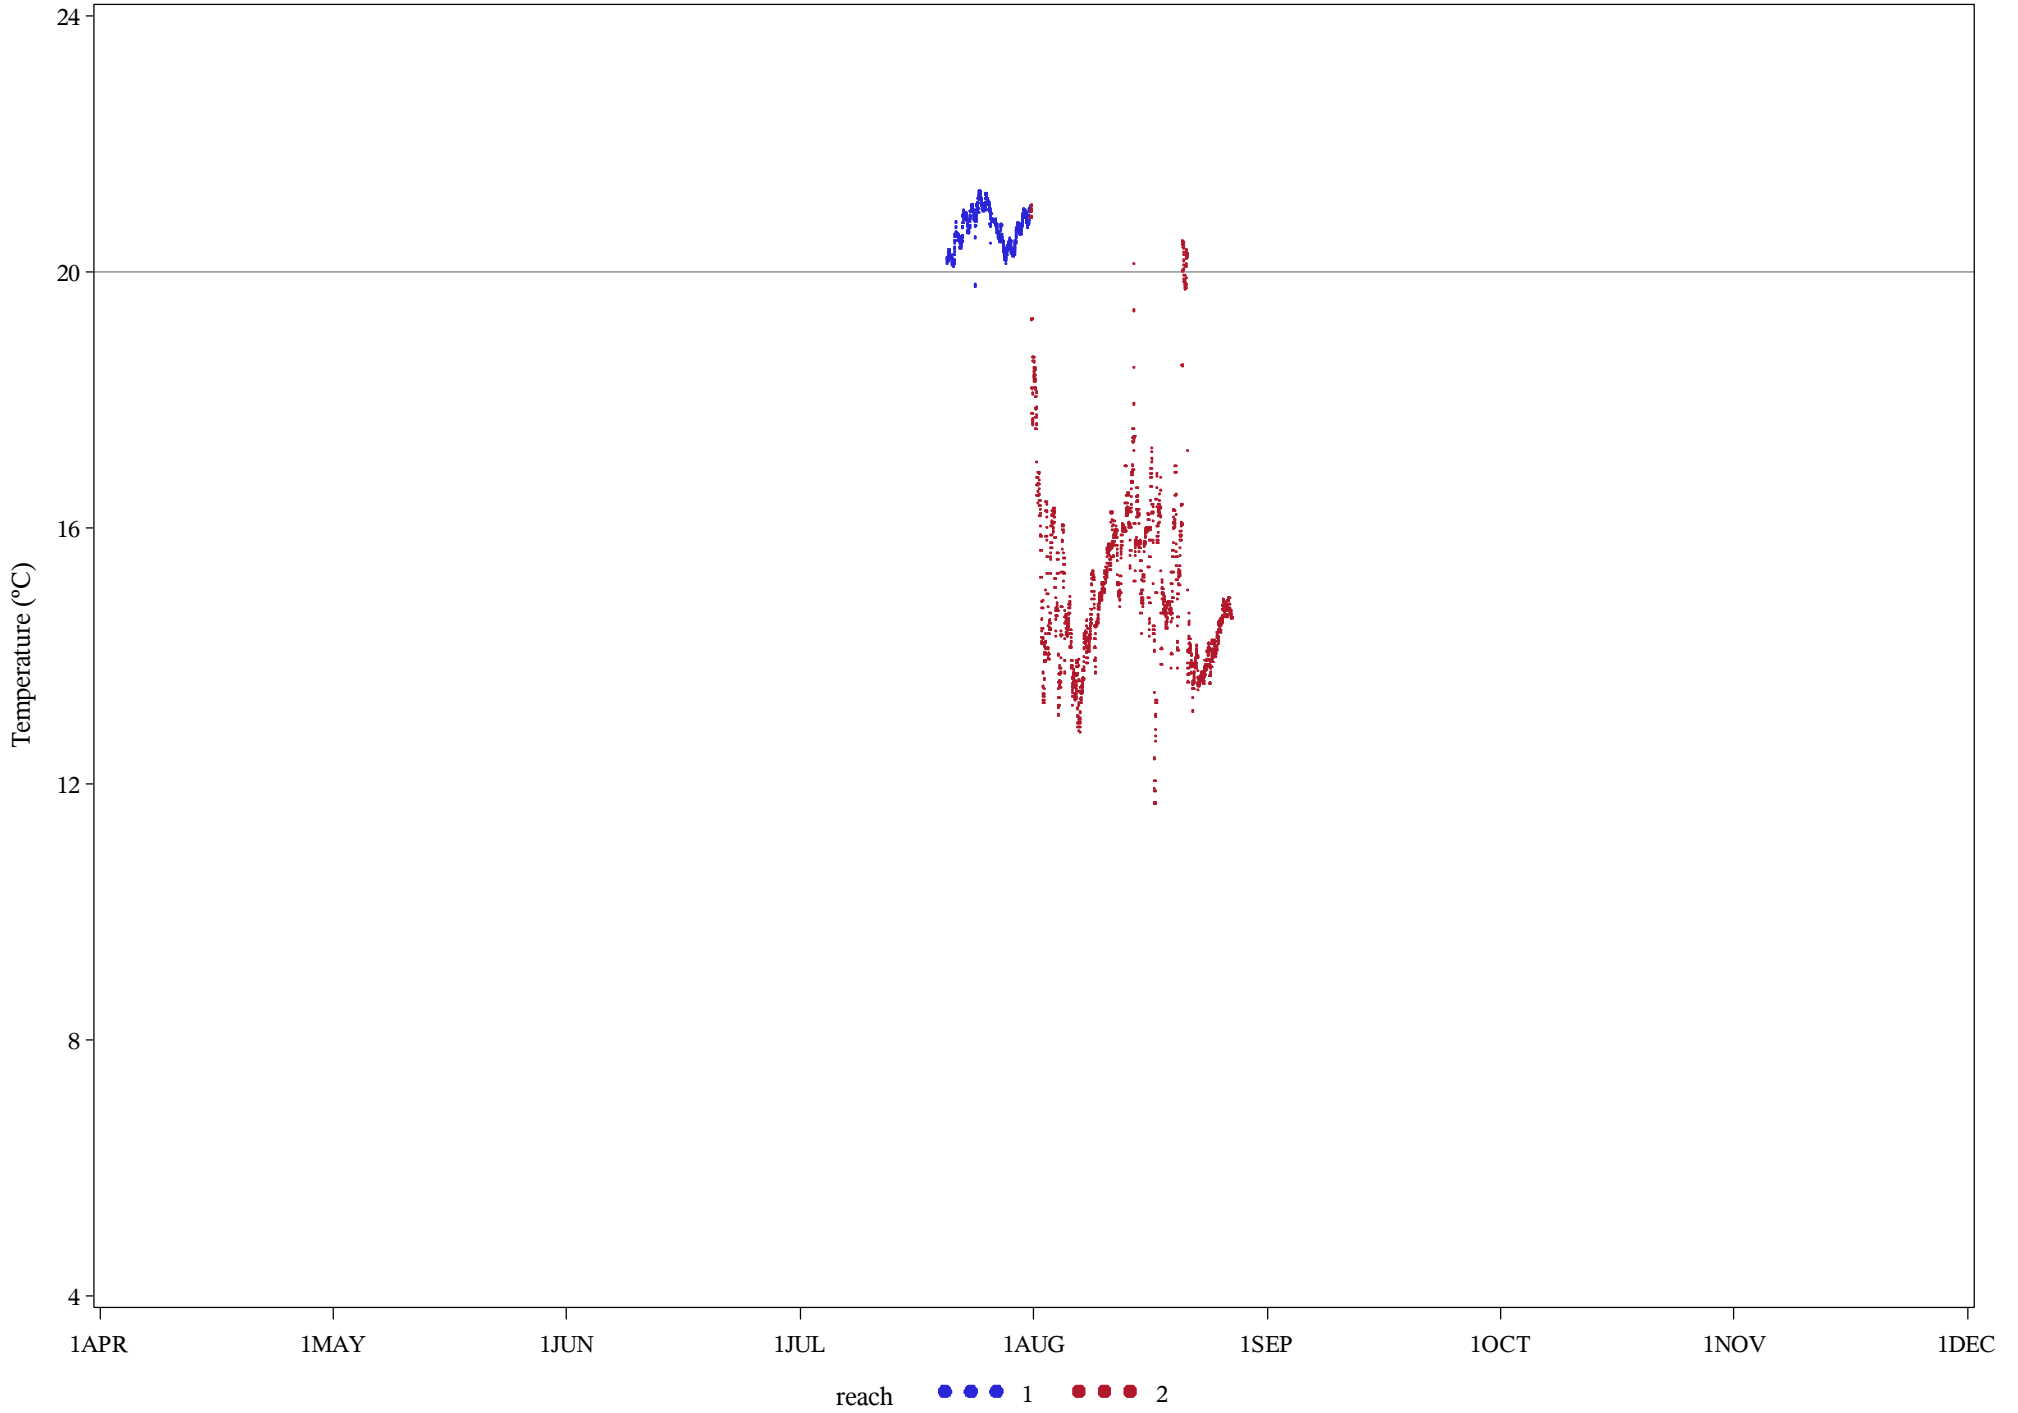





# Steelhead 4601B

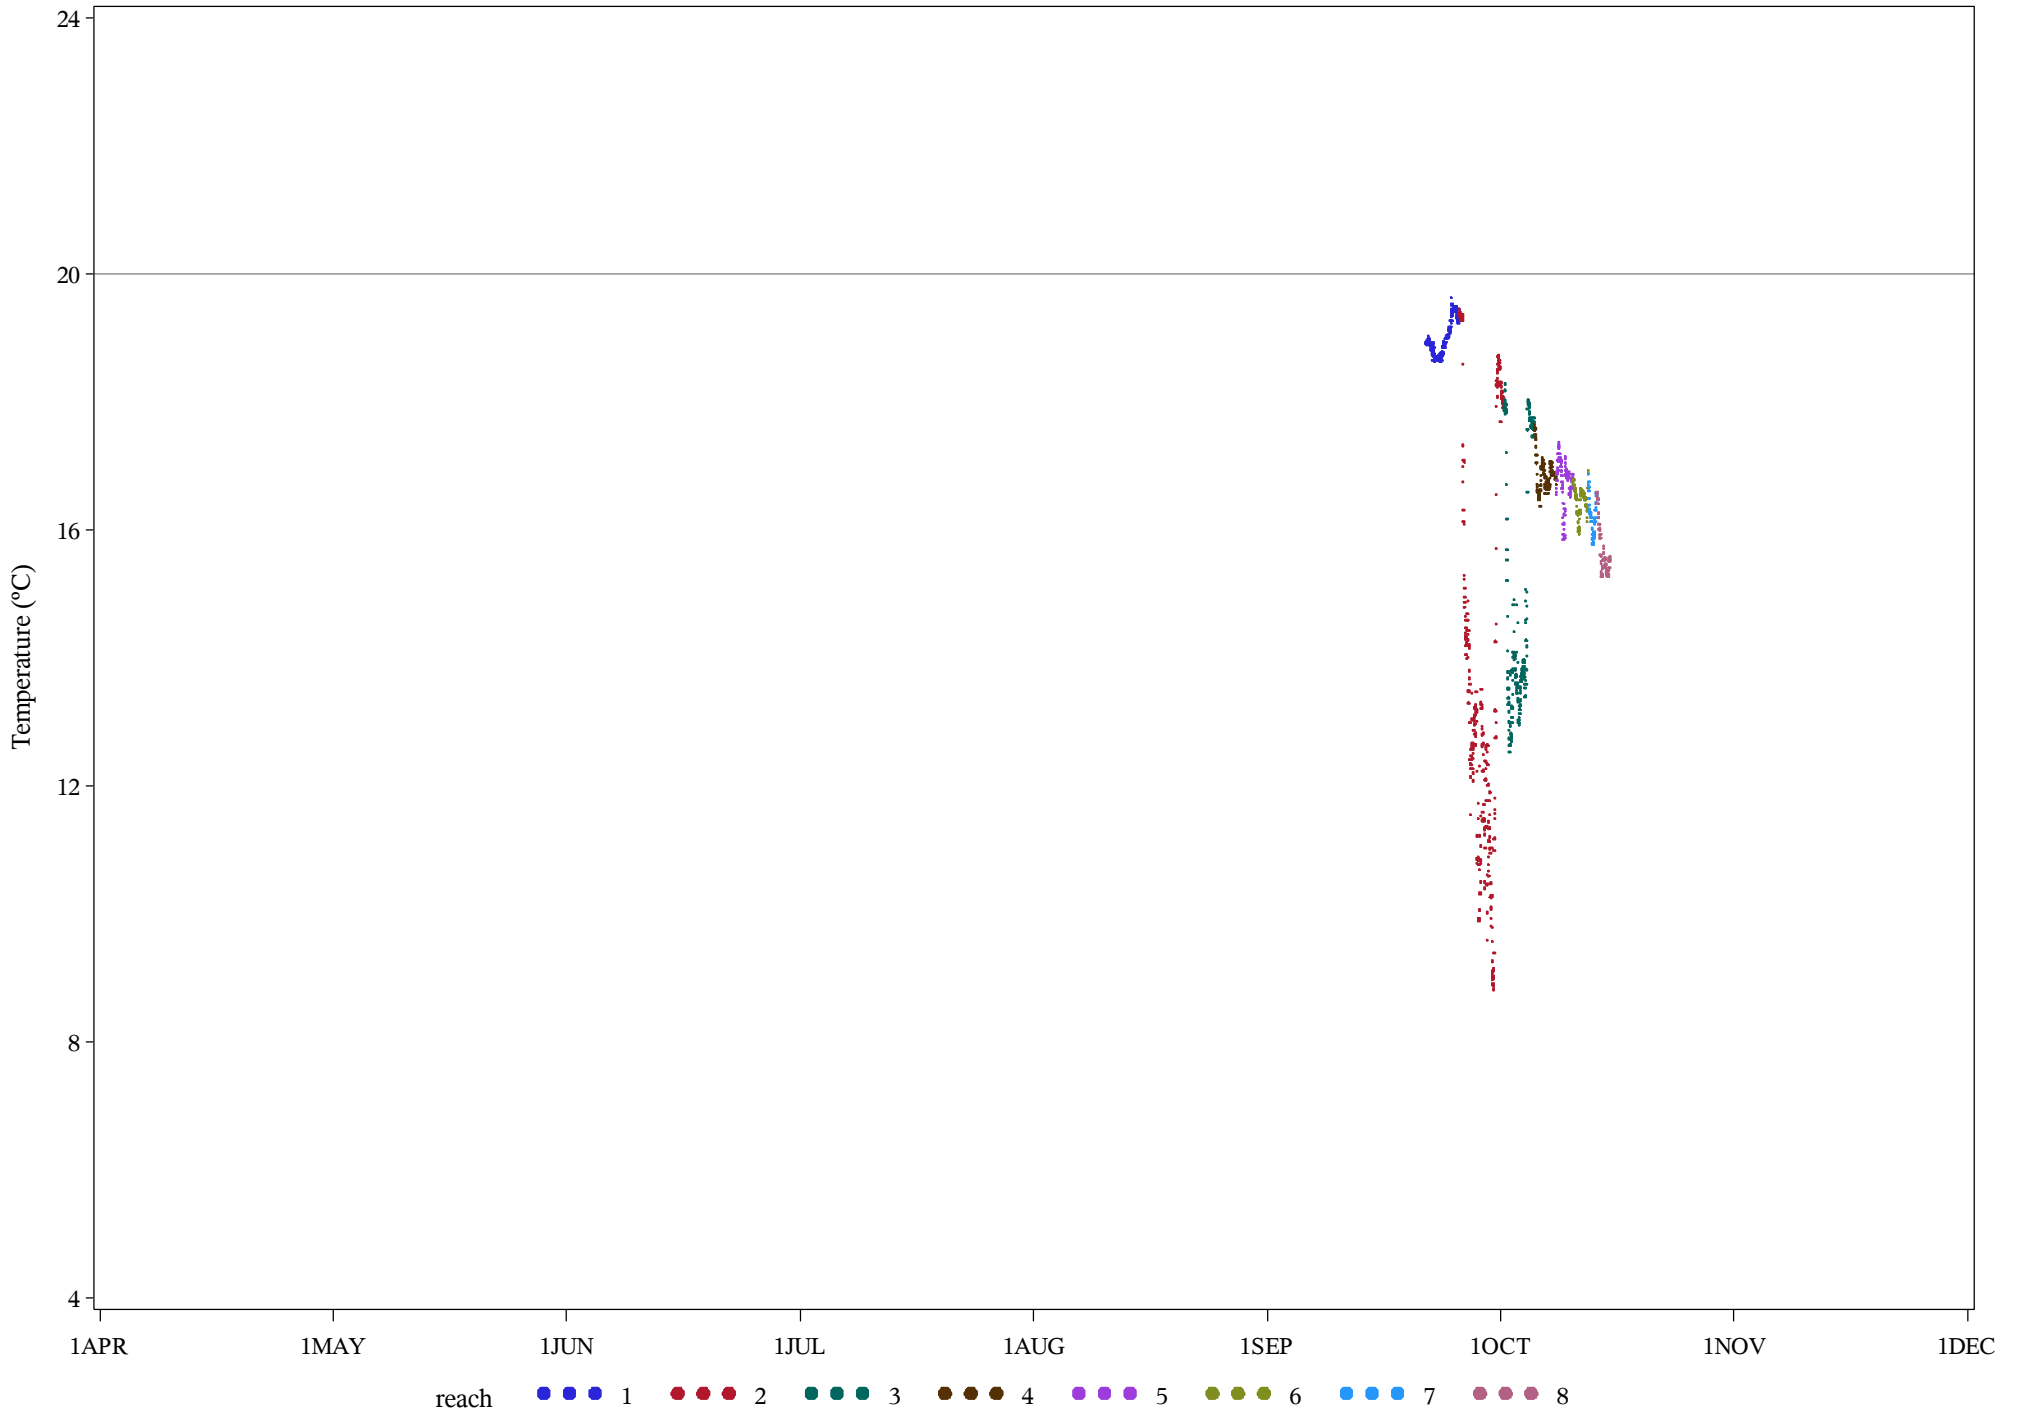

# Steelhead 4602A

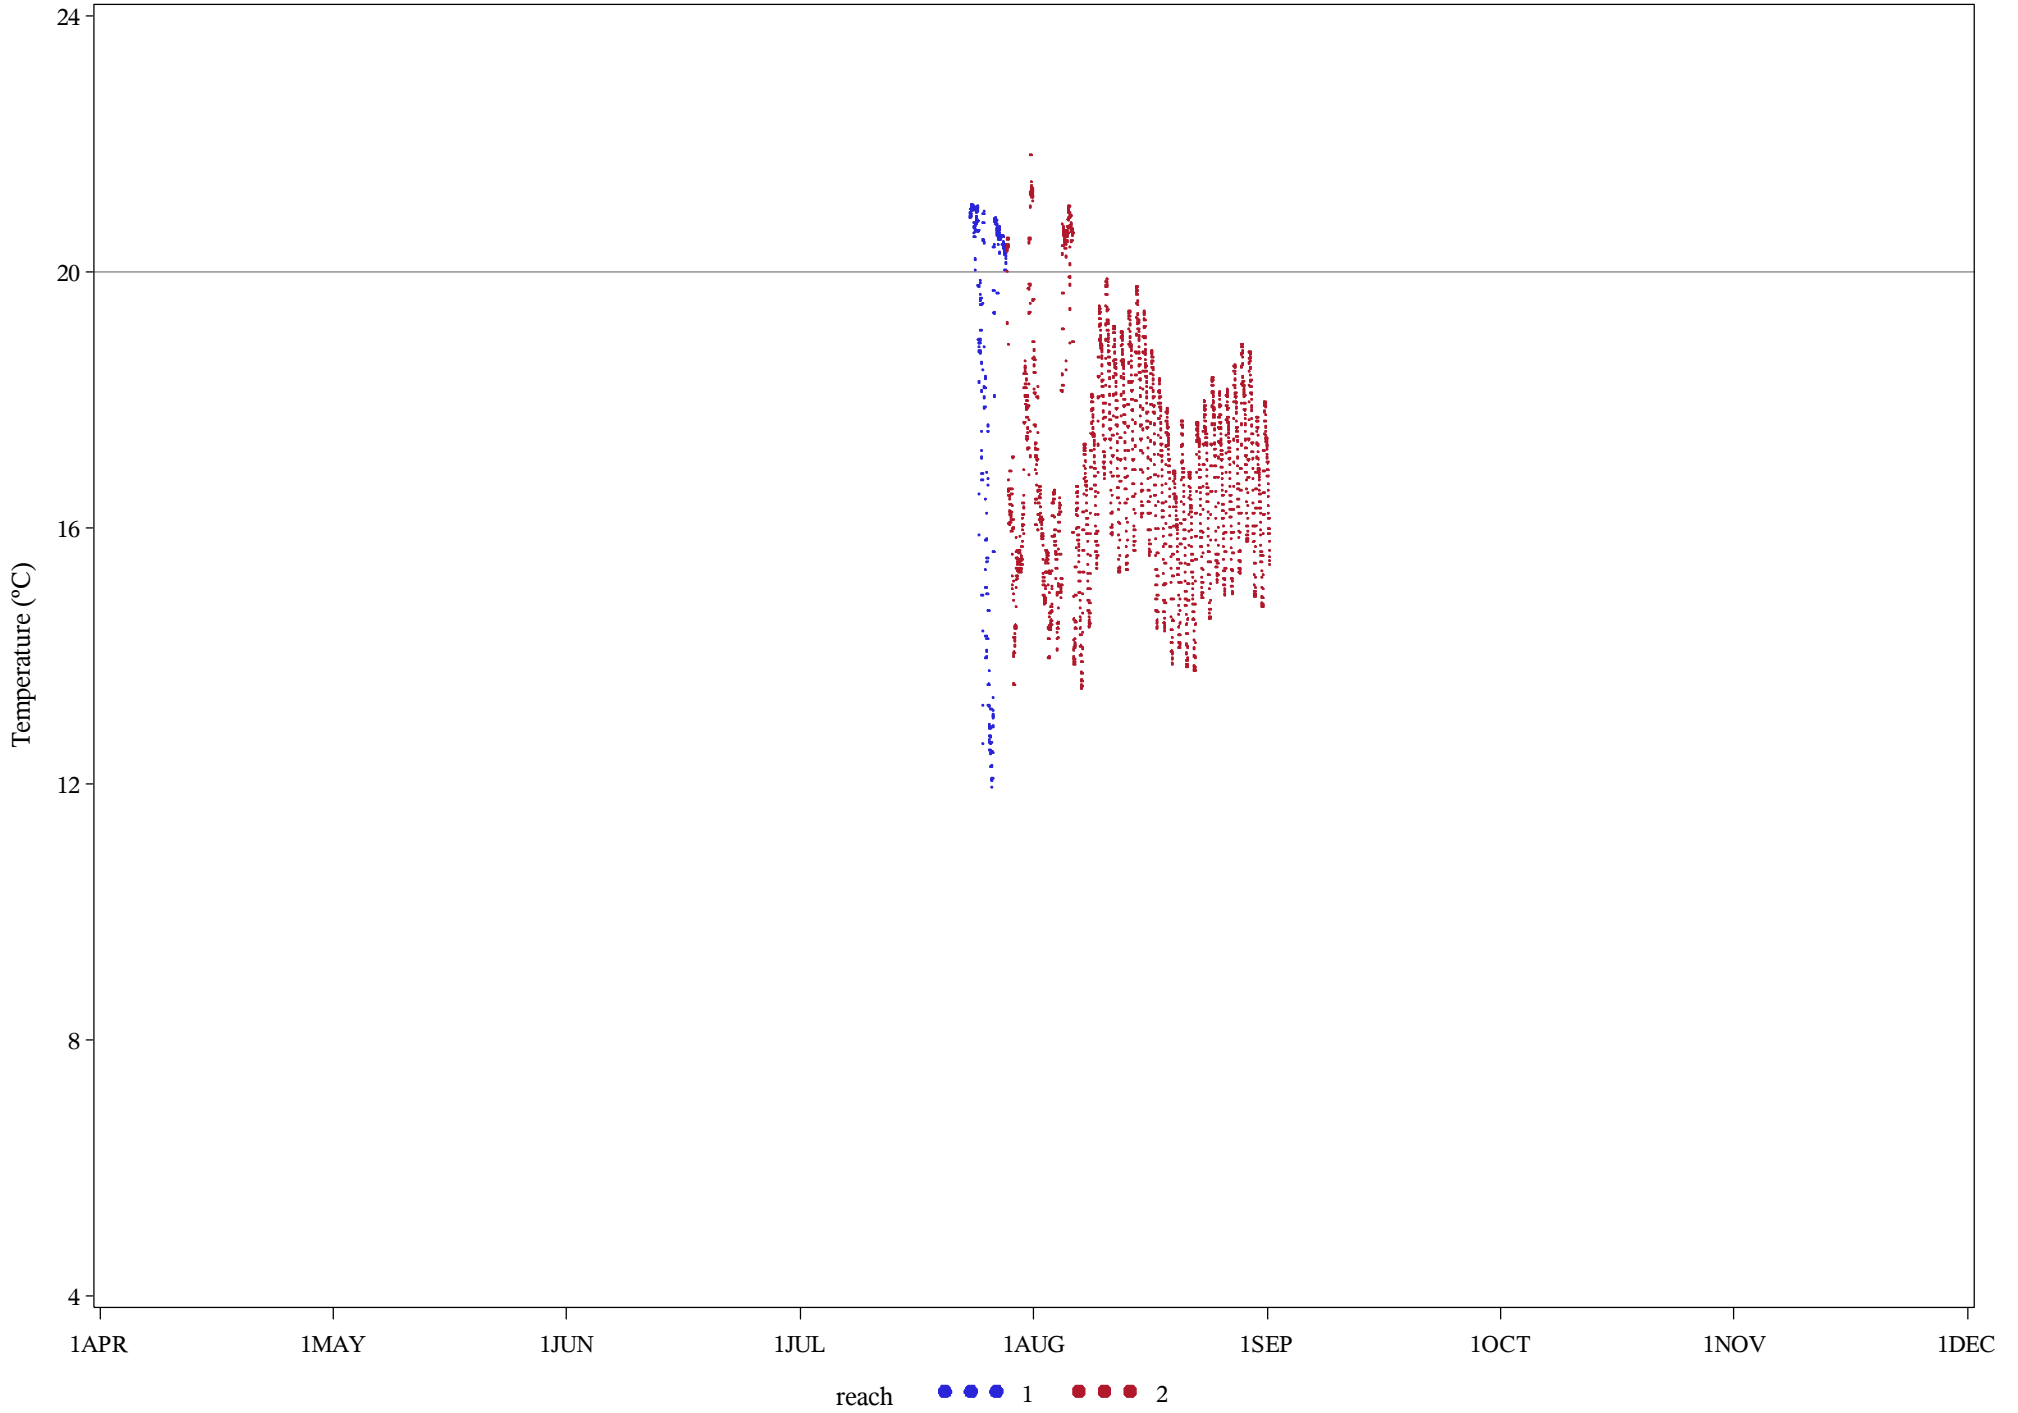

# Steelhead 4603A

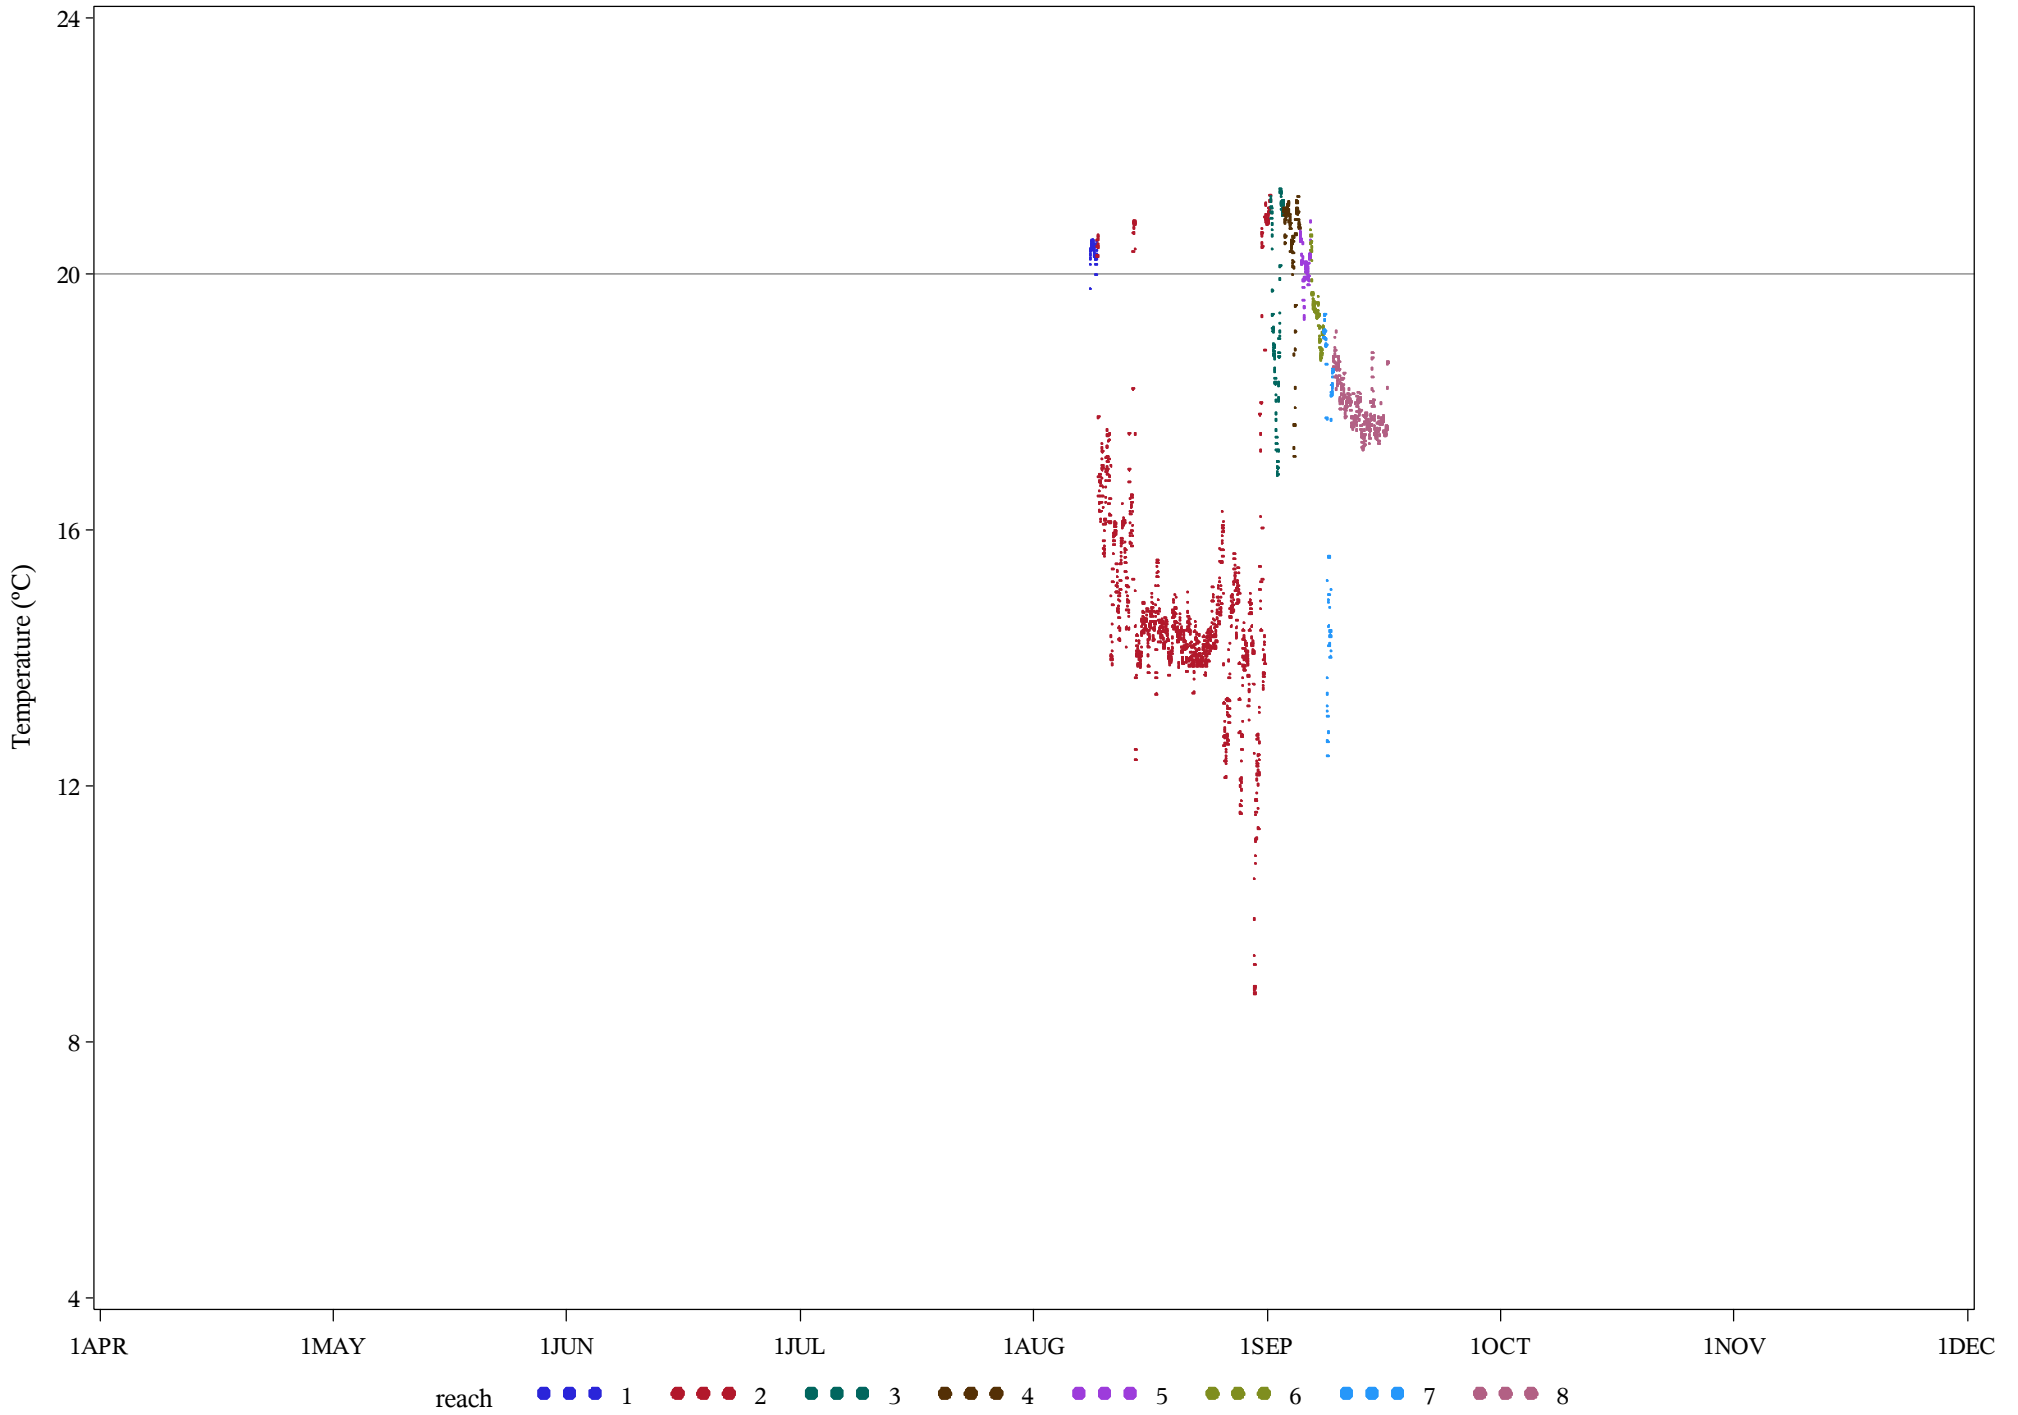

Steelhead  
4607A

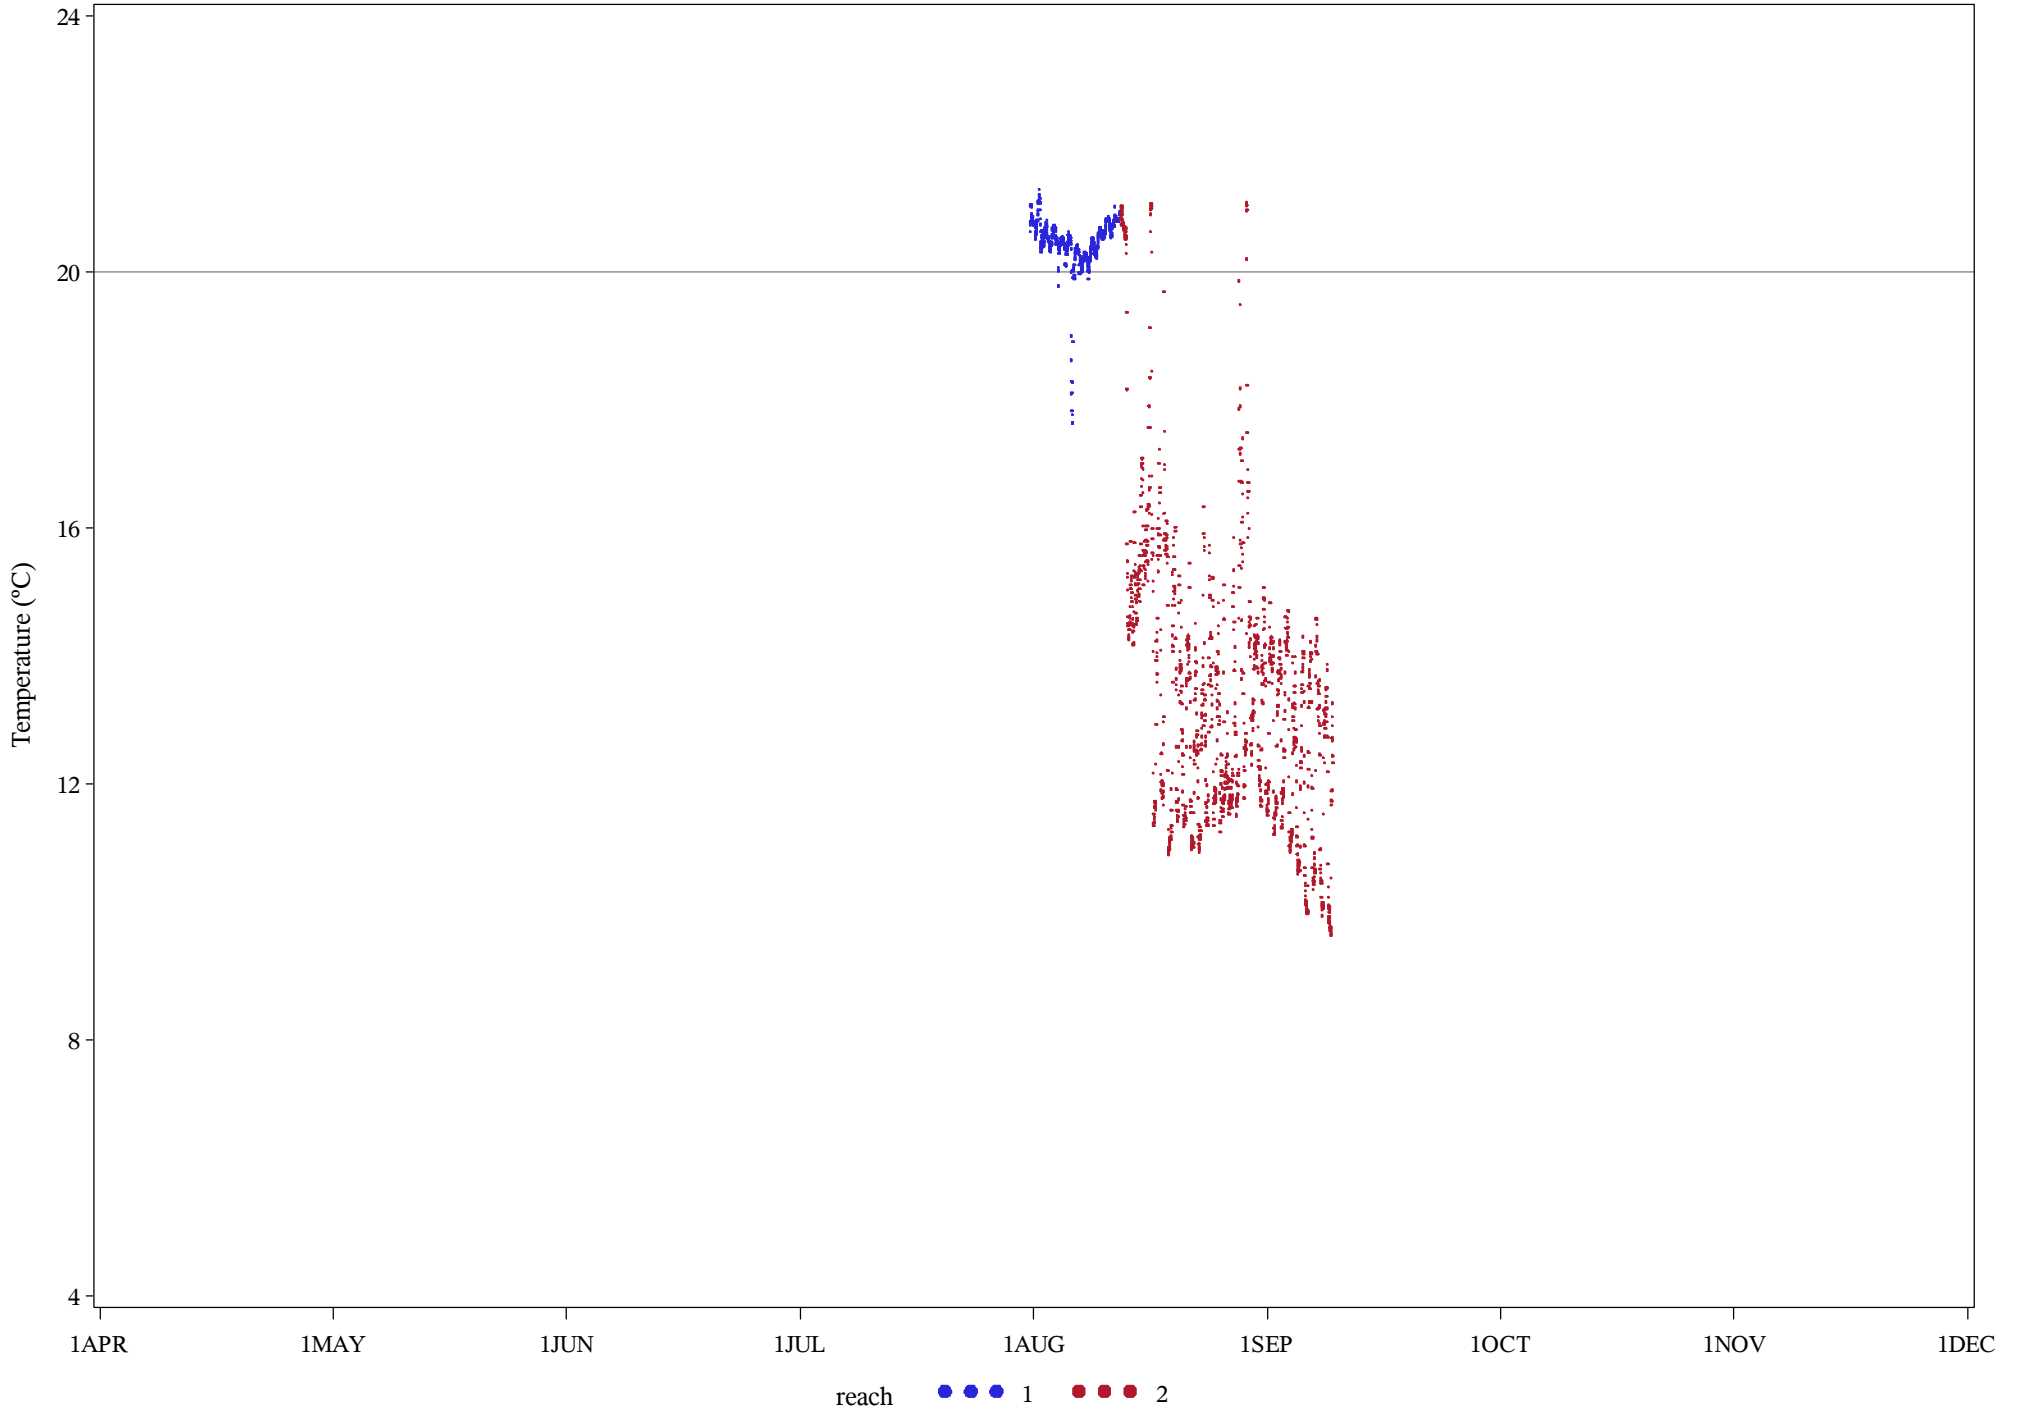

# Steelhead 4608A

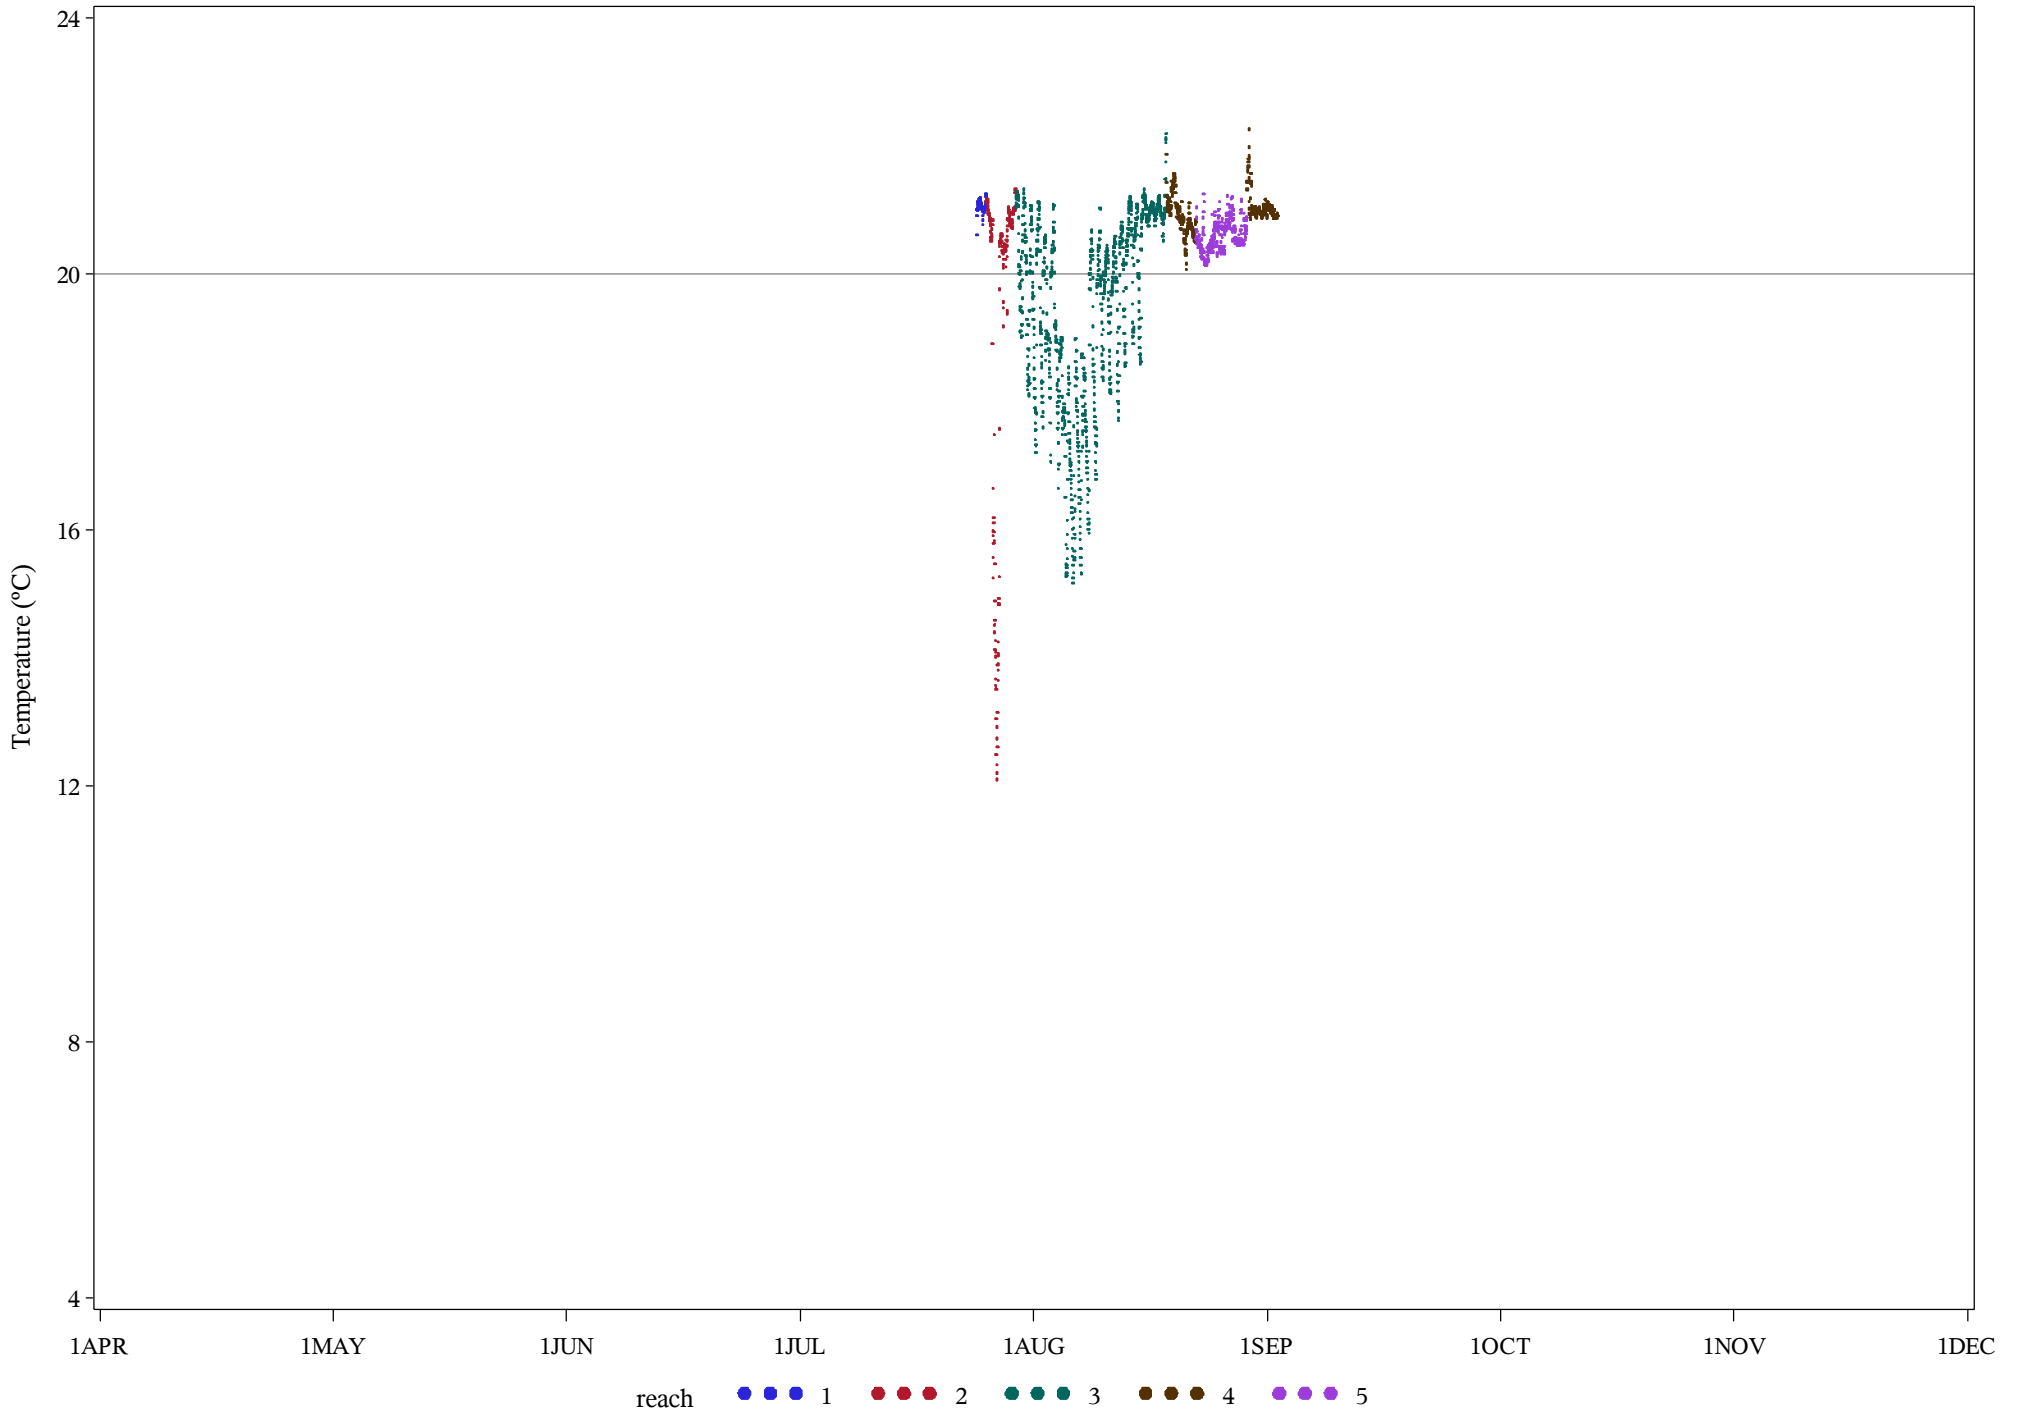

# Steelhead 4610A

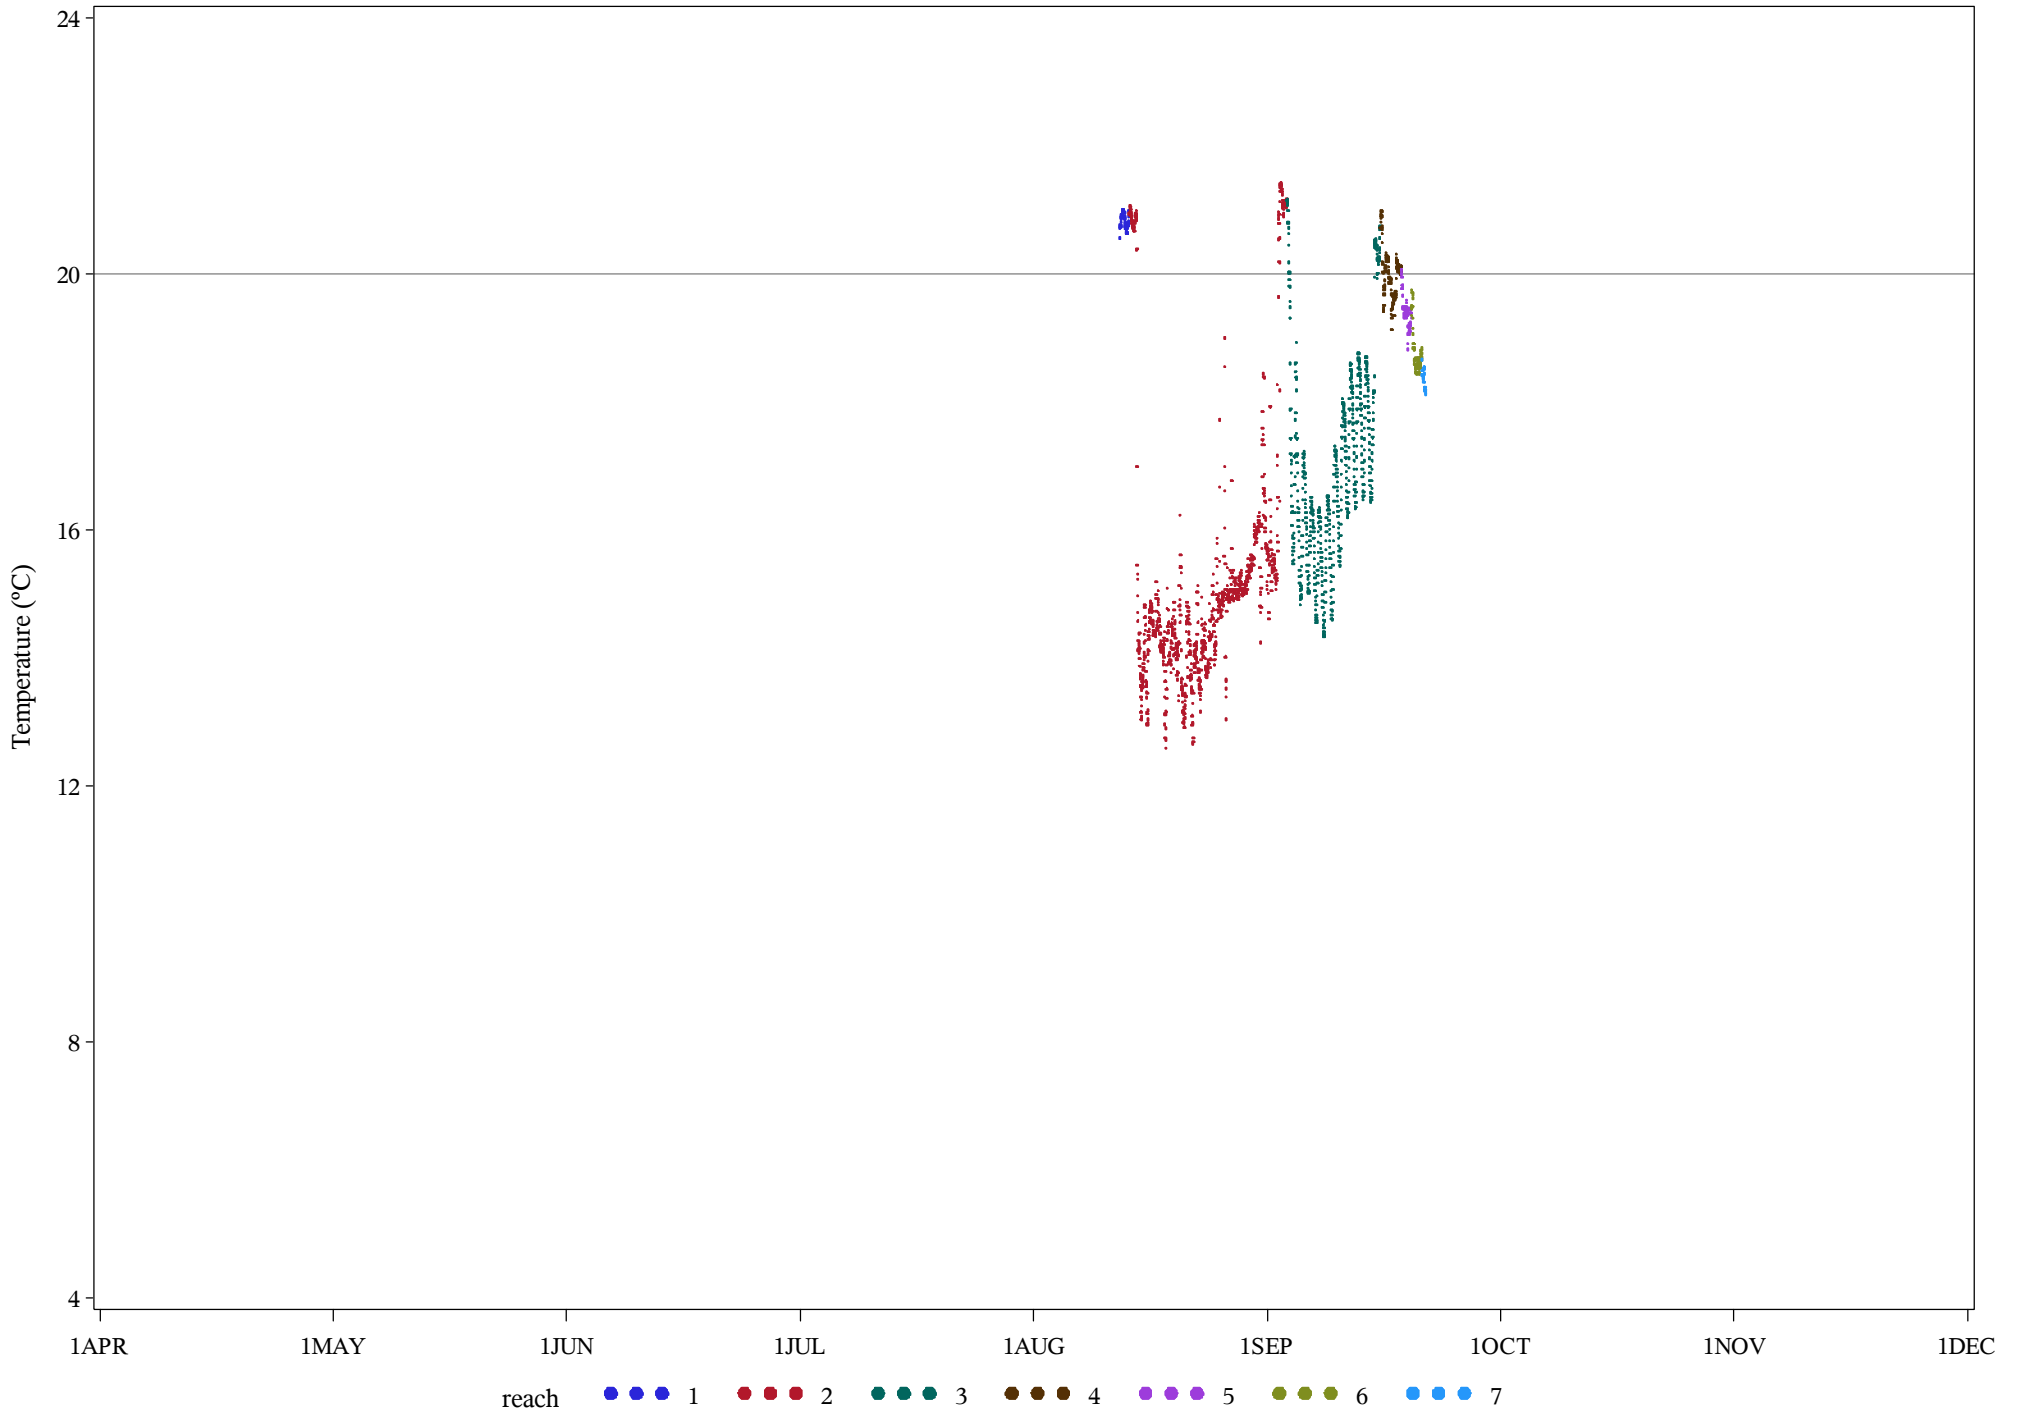

# Steelhead 4611A

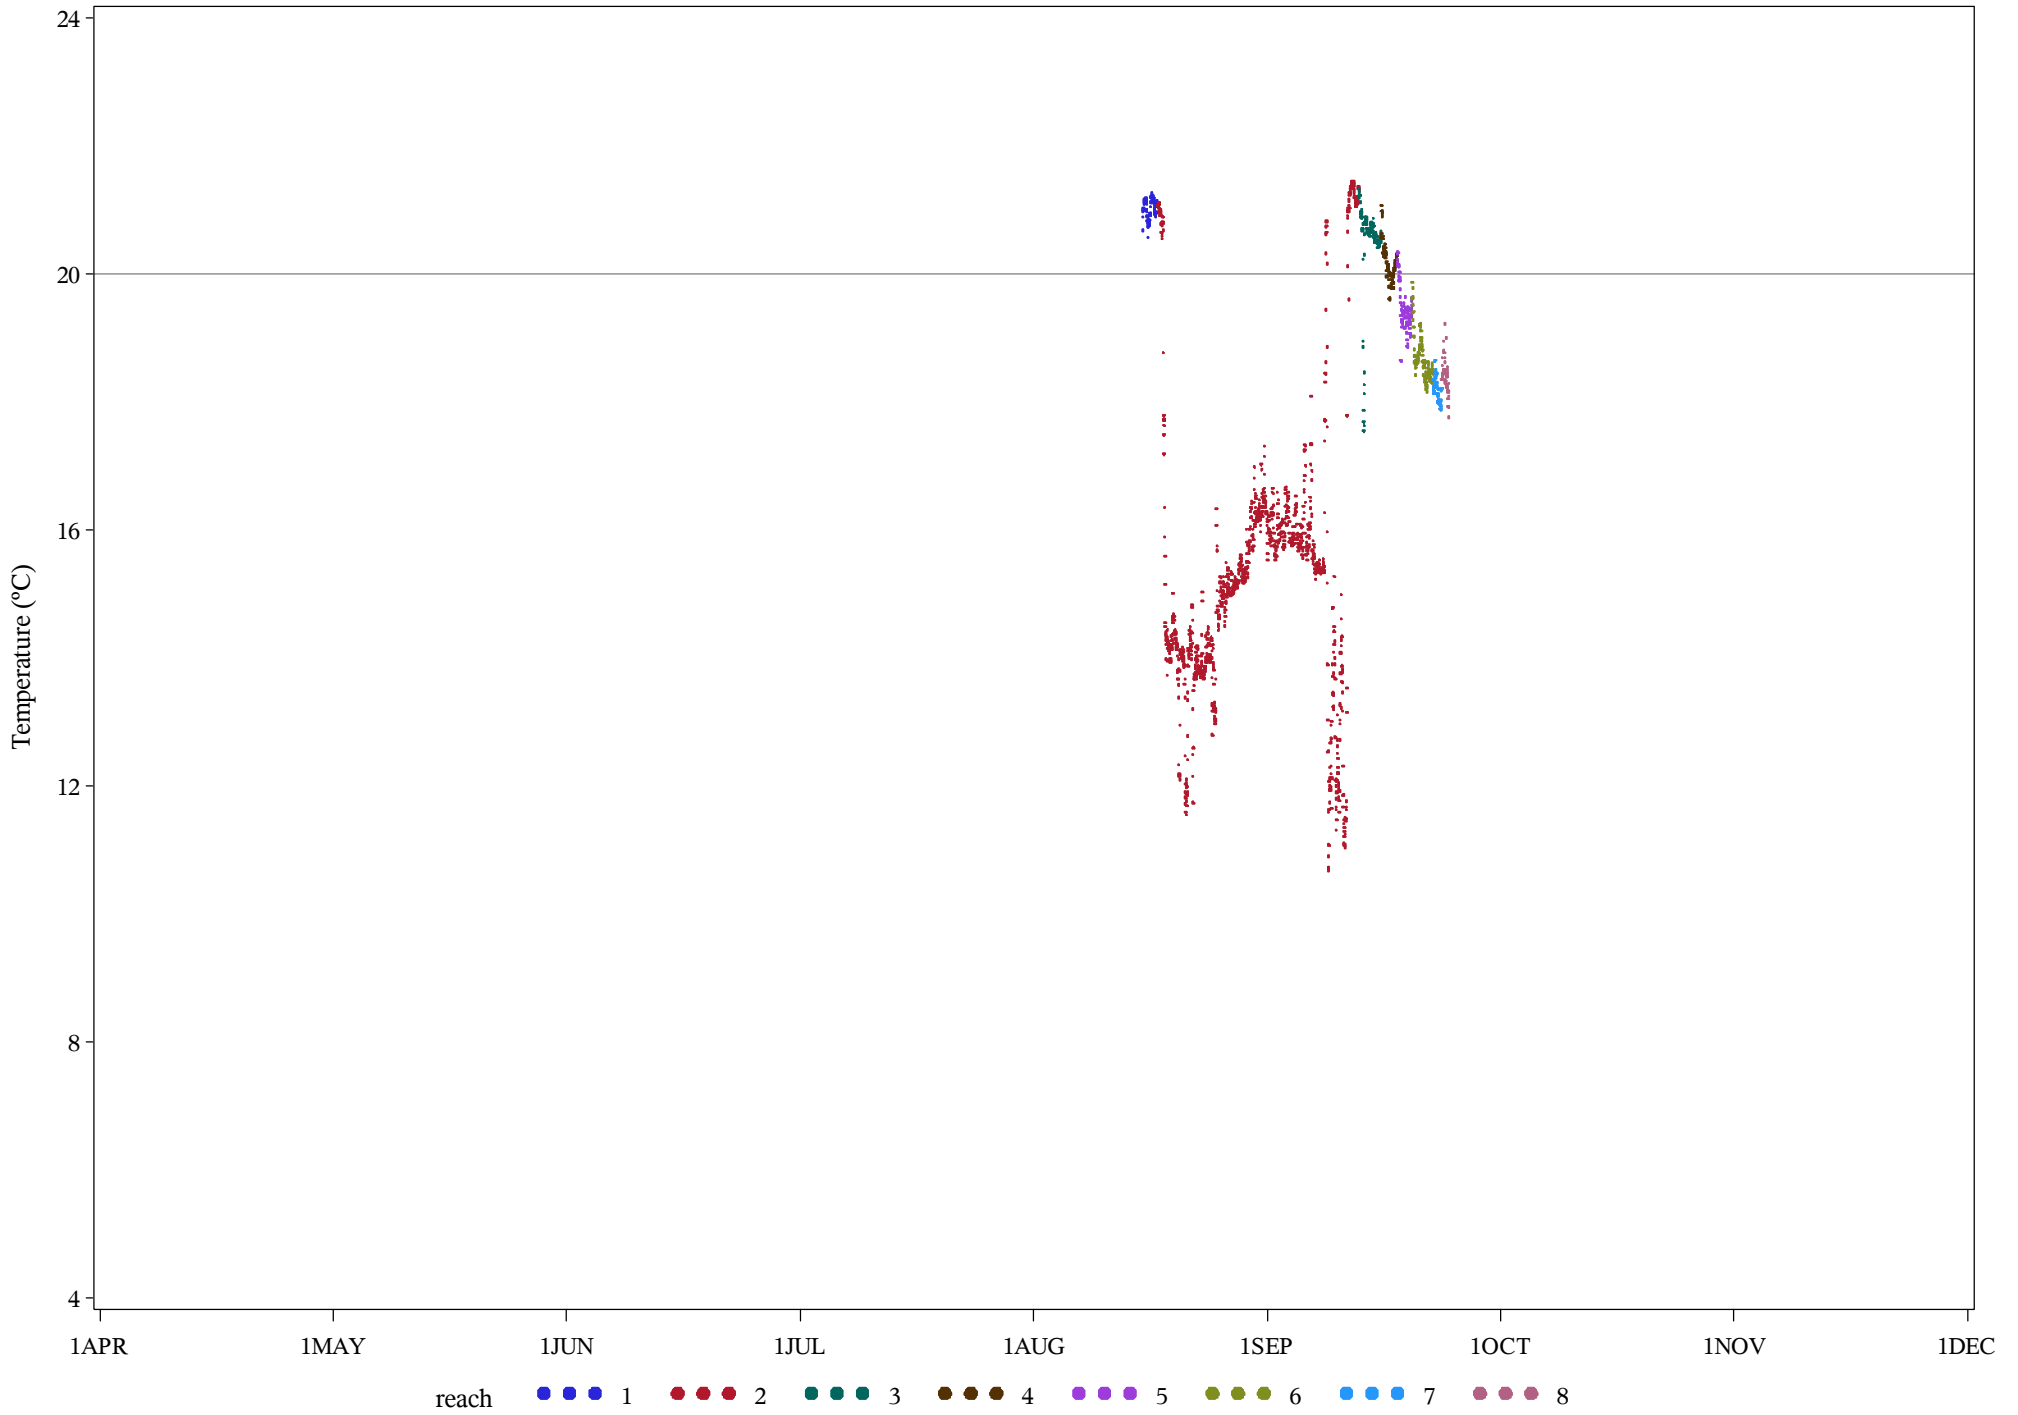



# Steelhead 4612A

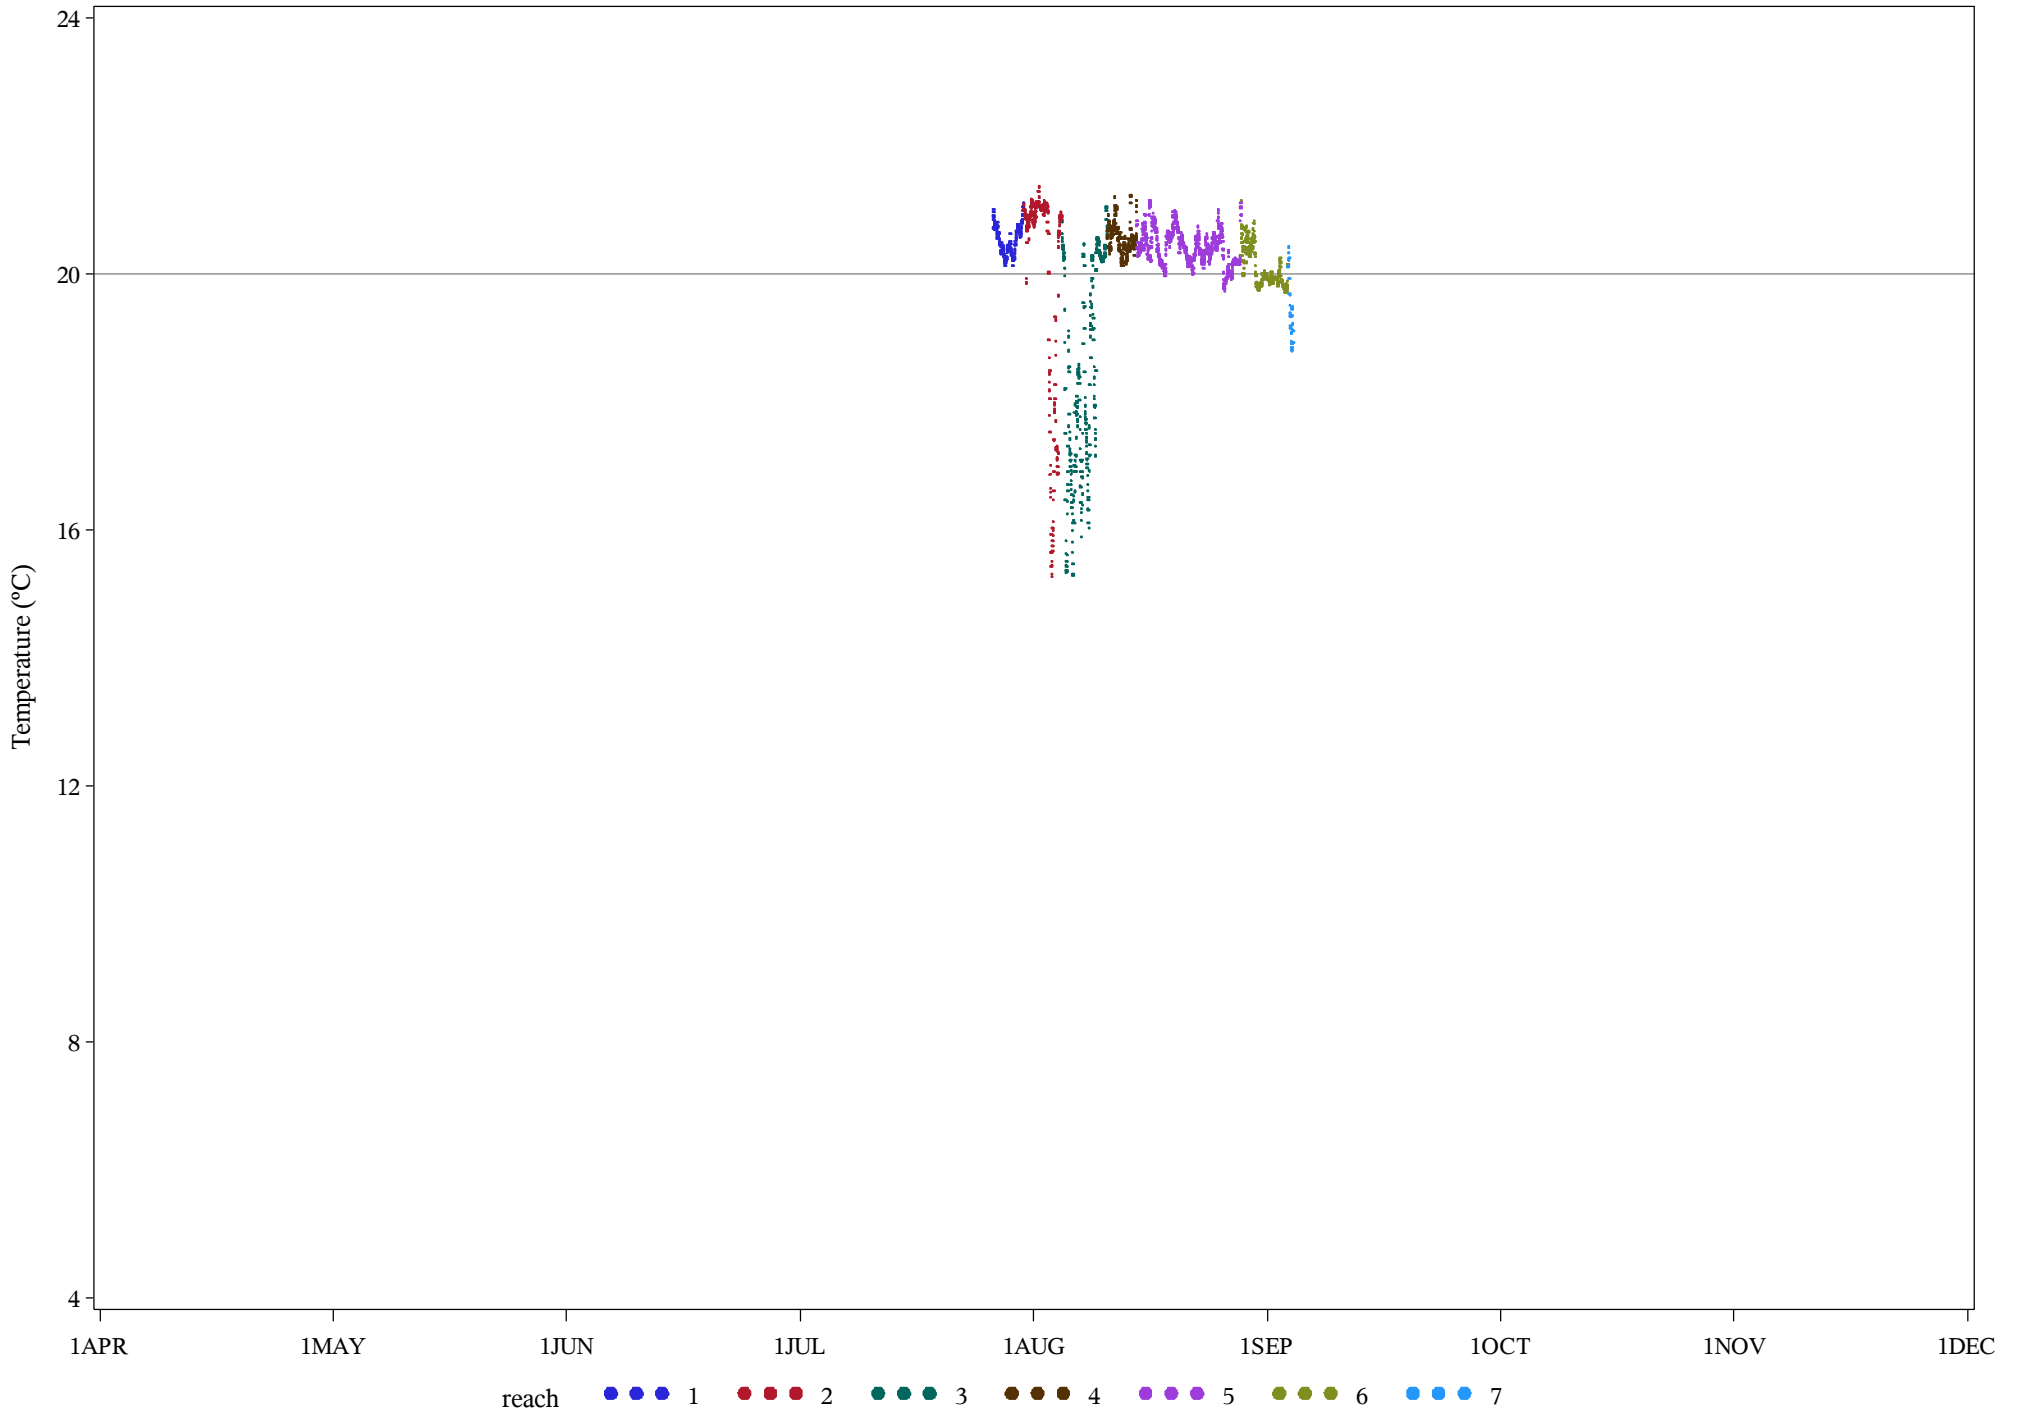

Steelhead  
4613A

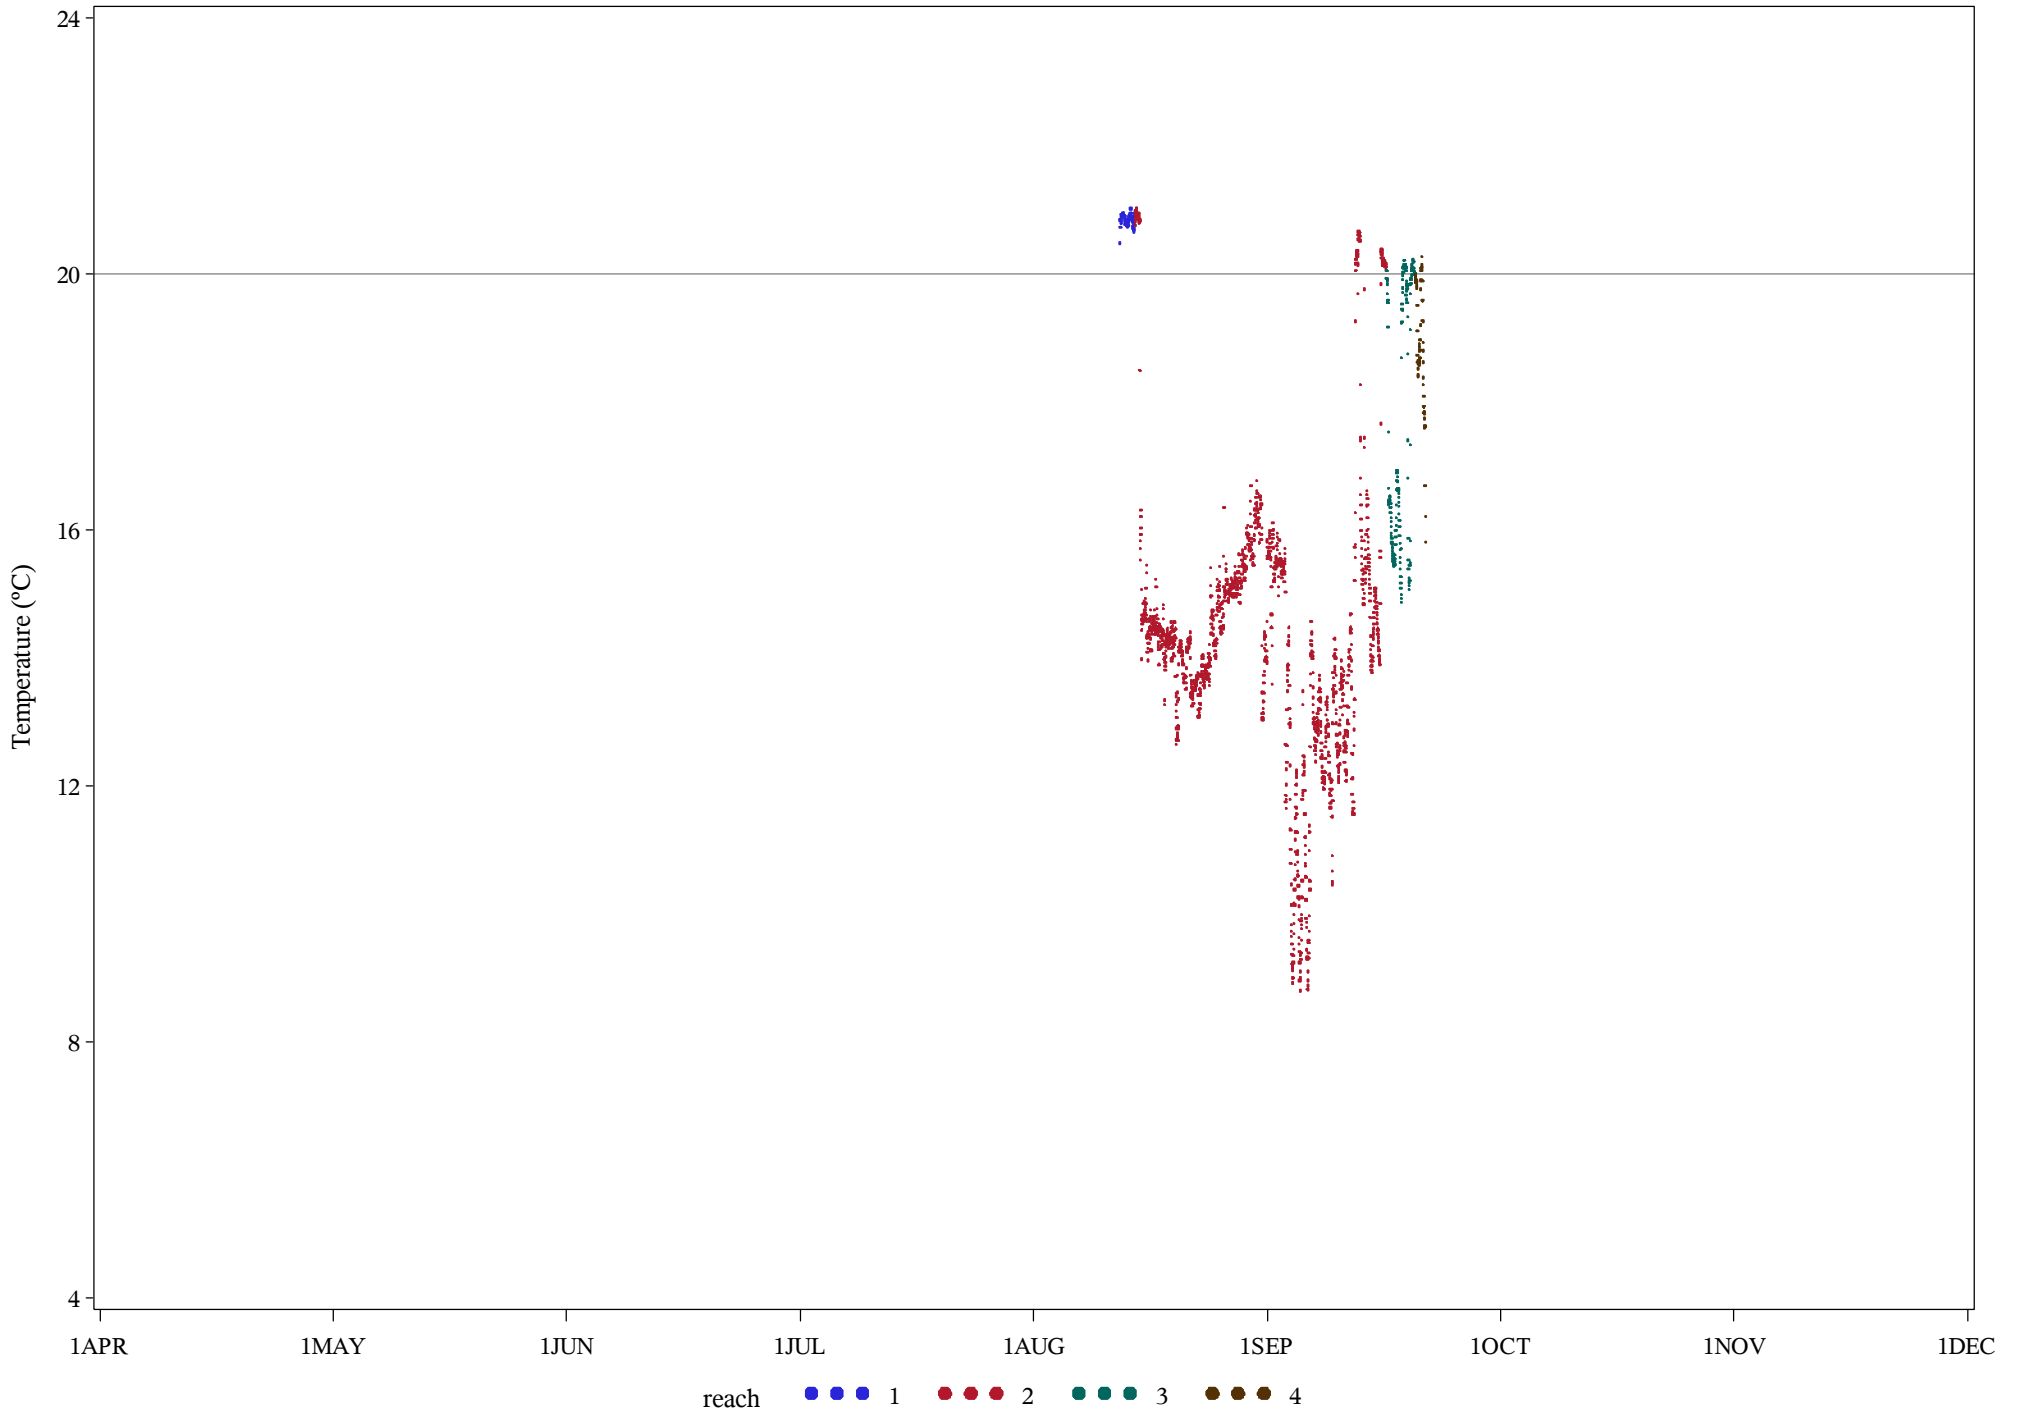

Steelhead  
4621A

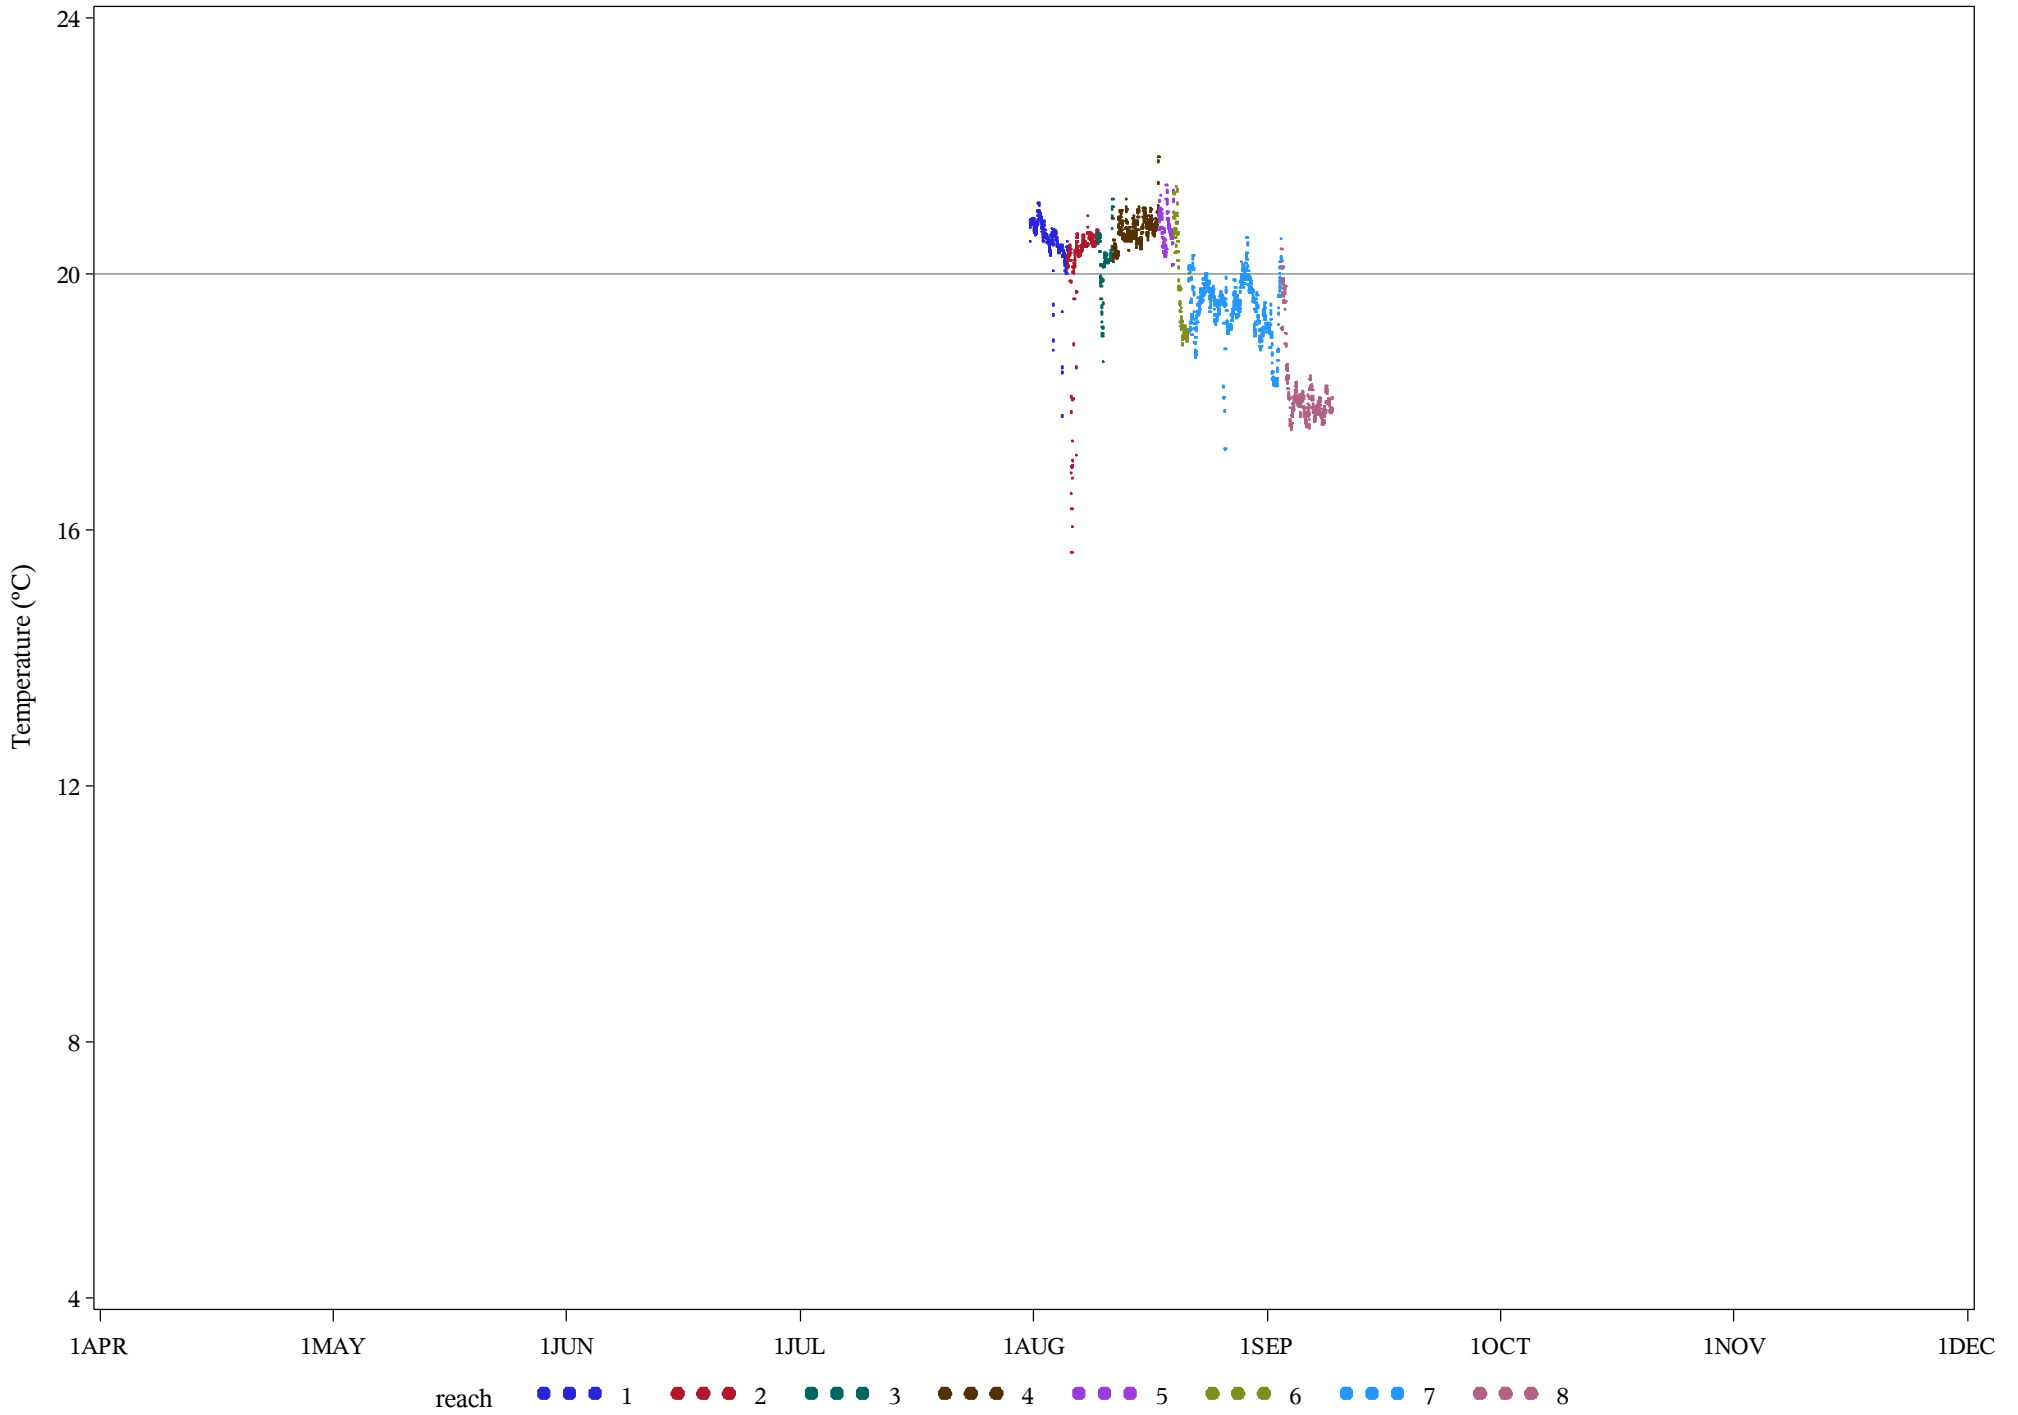

Steelhead  
4622A

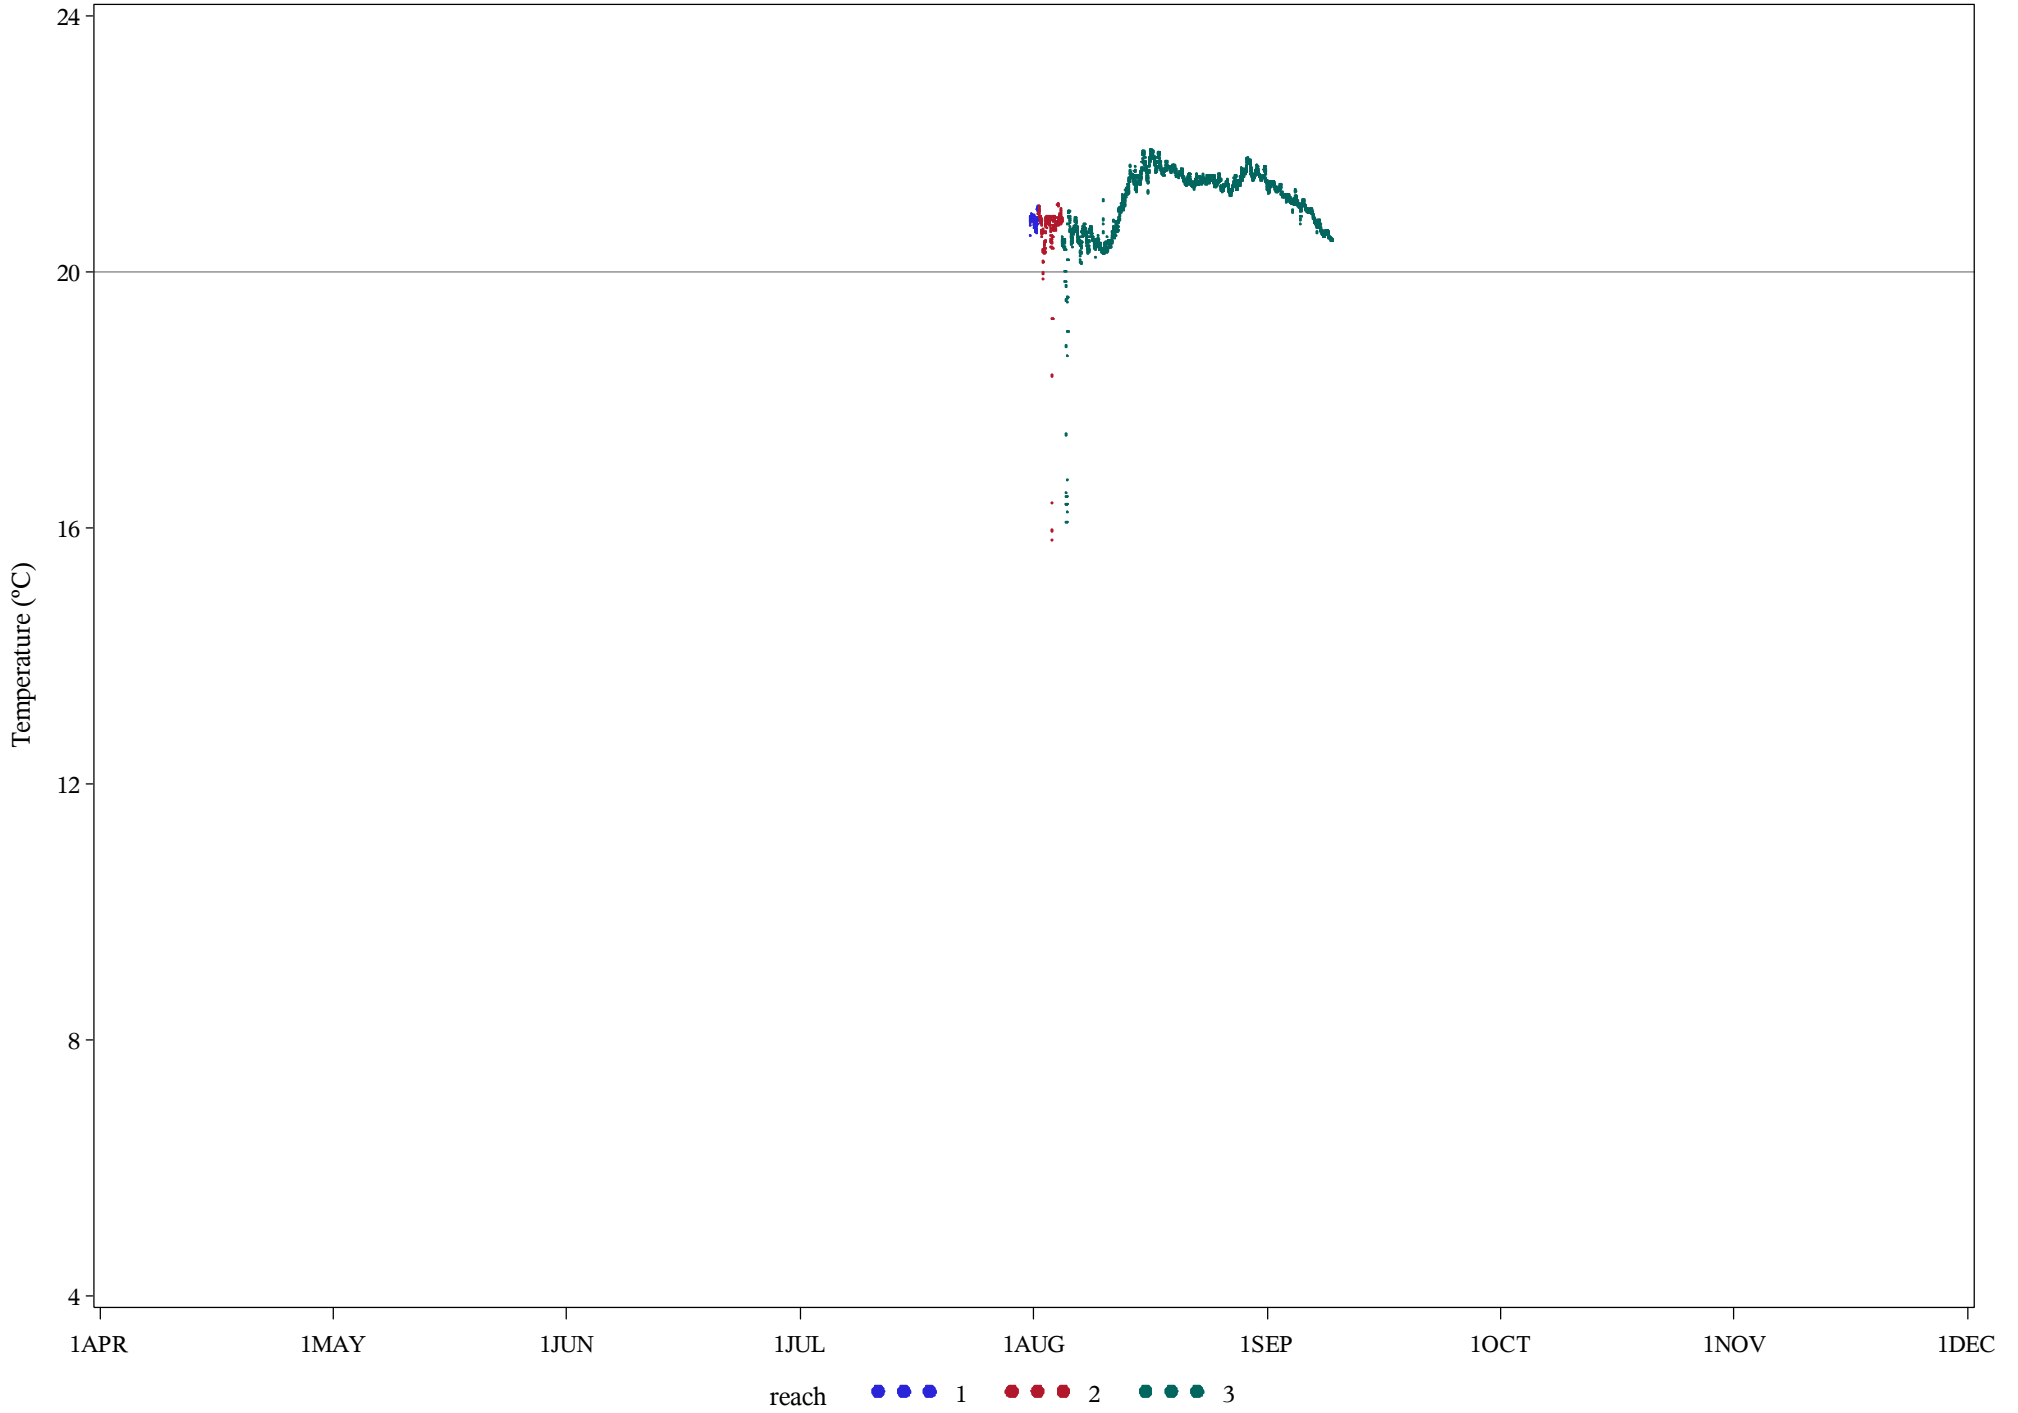

Steelhead  
4623A

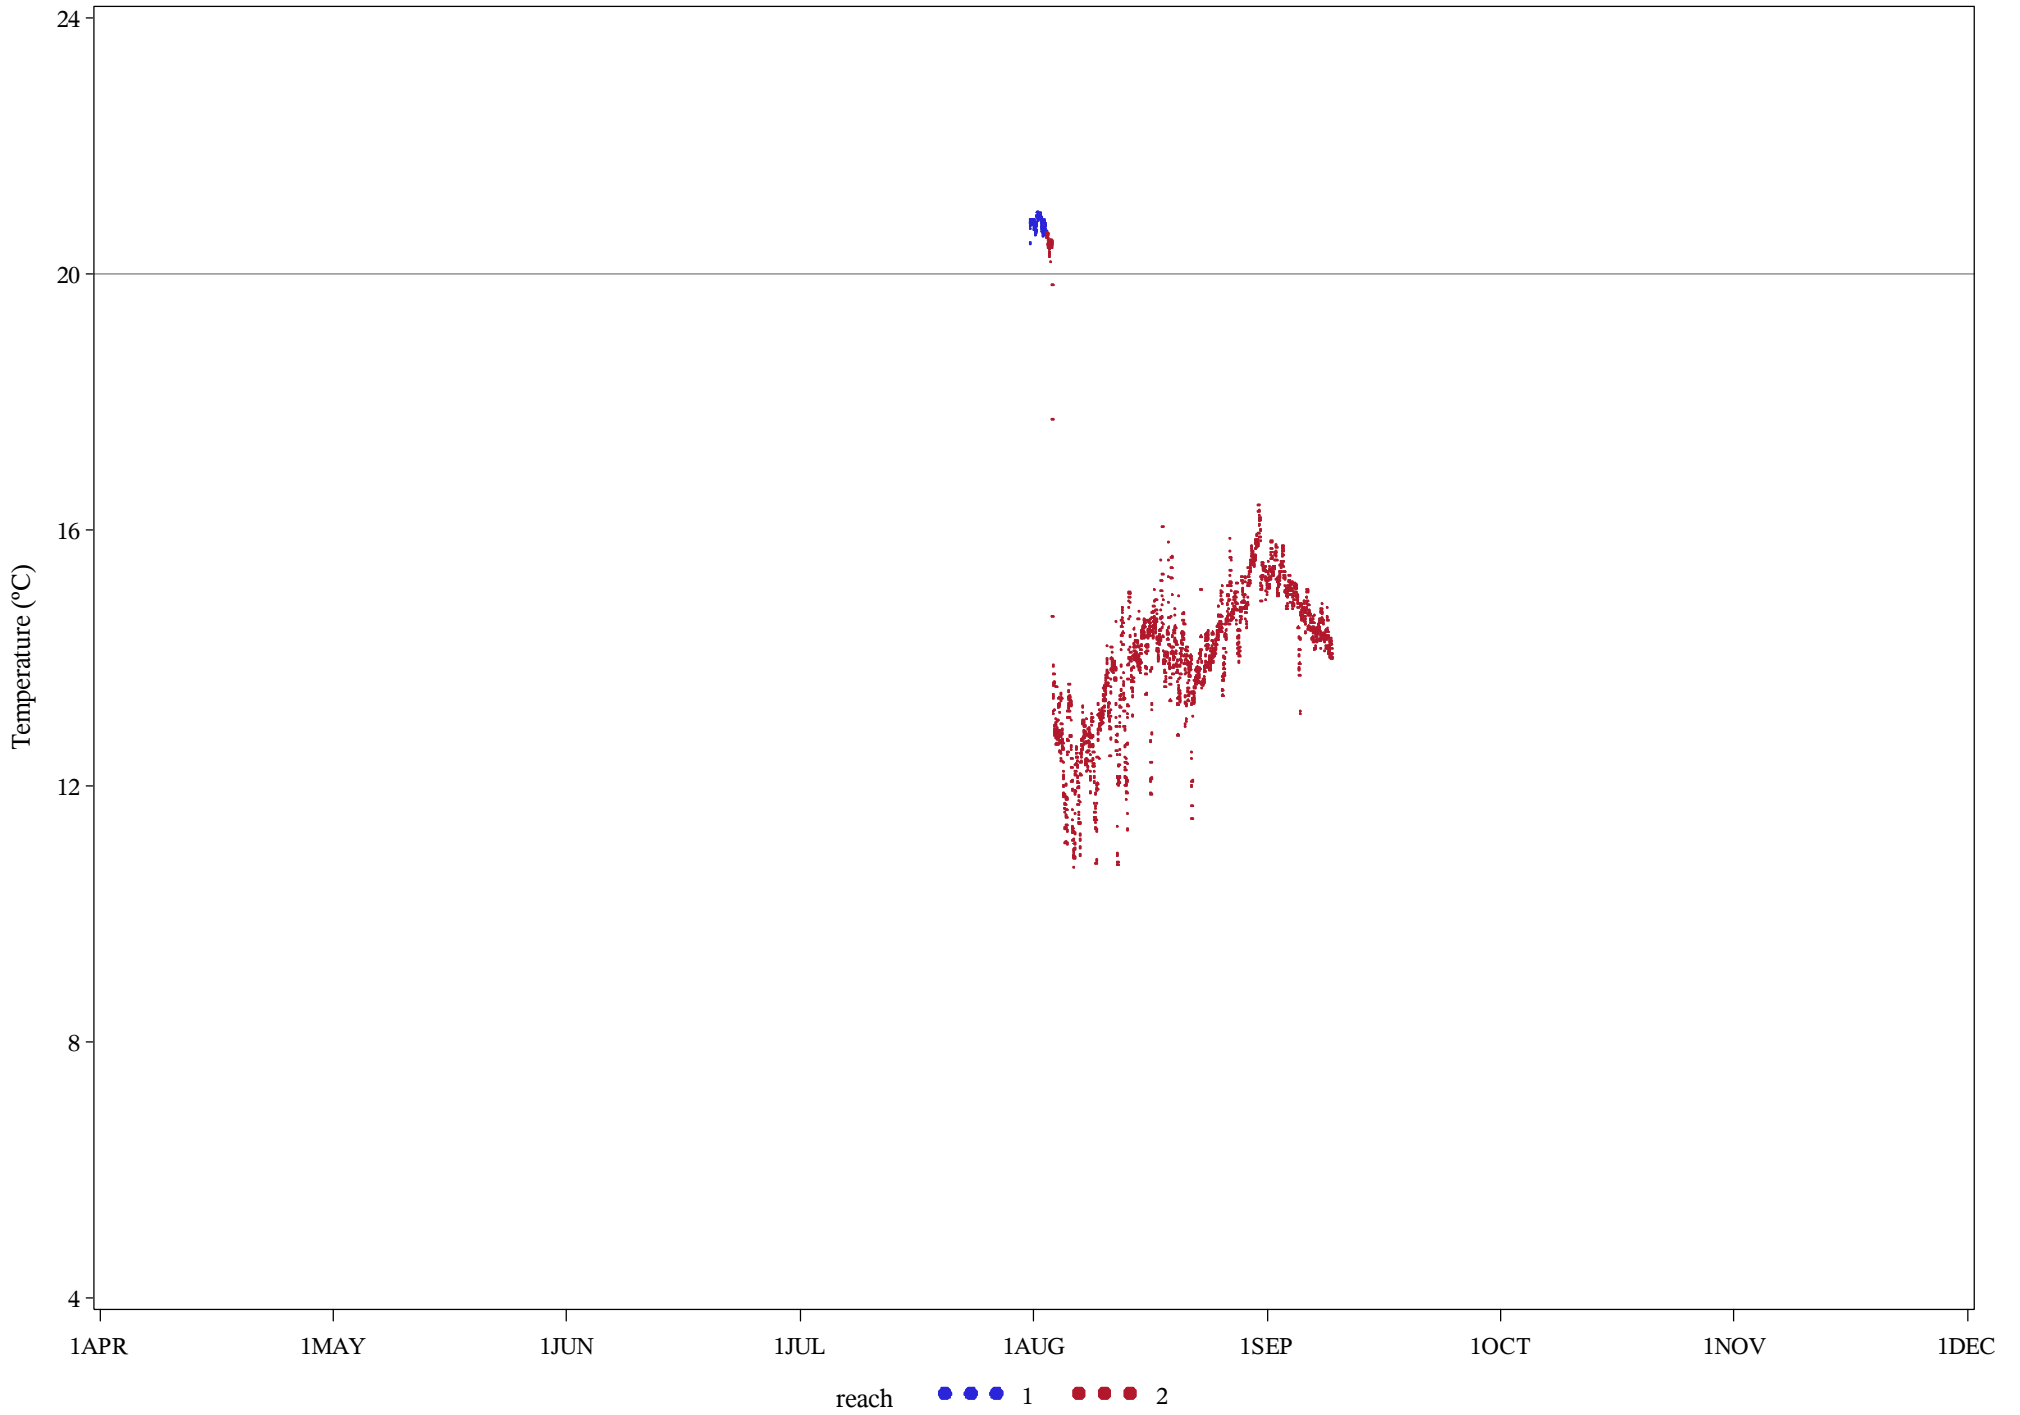

Steelhead  
4625A

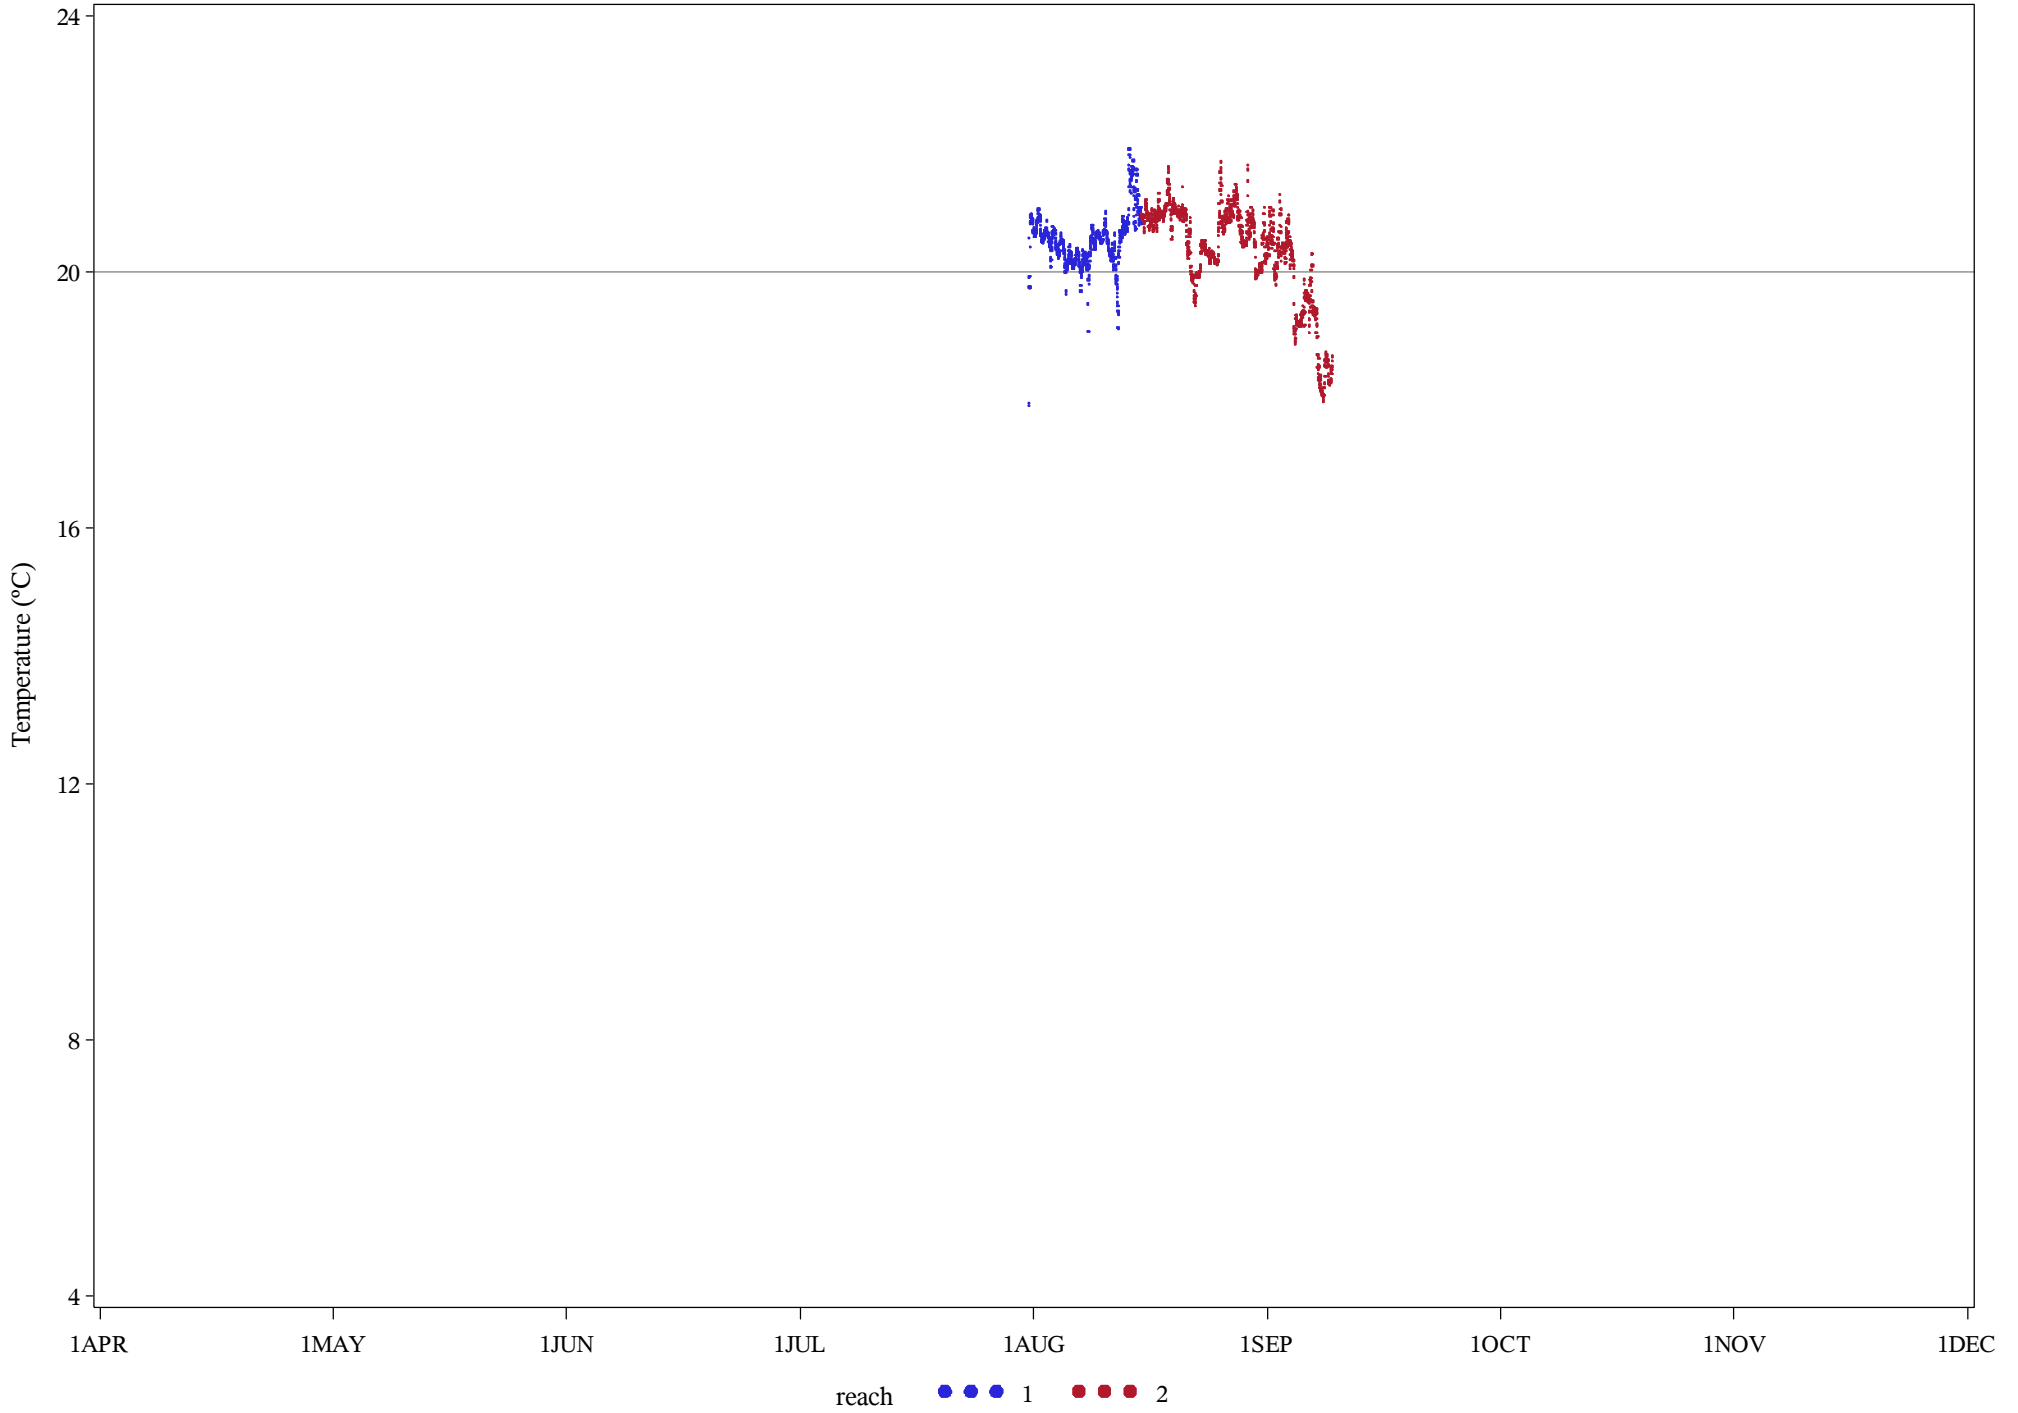

# Steelhead 4626A

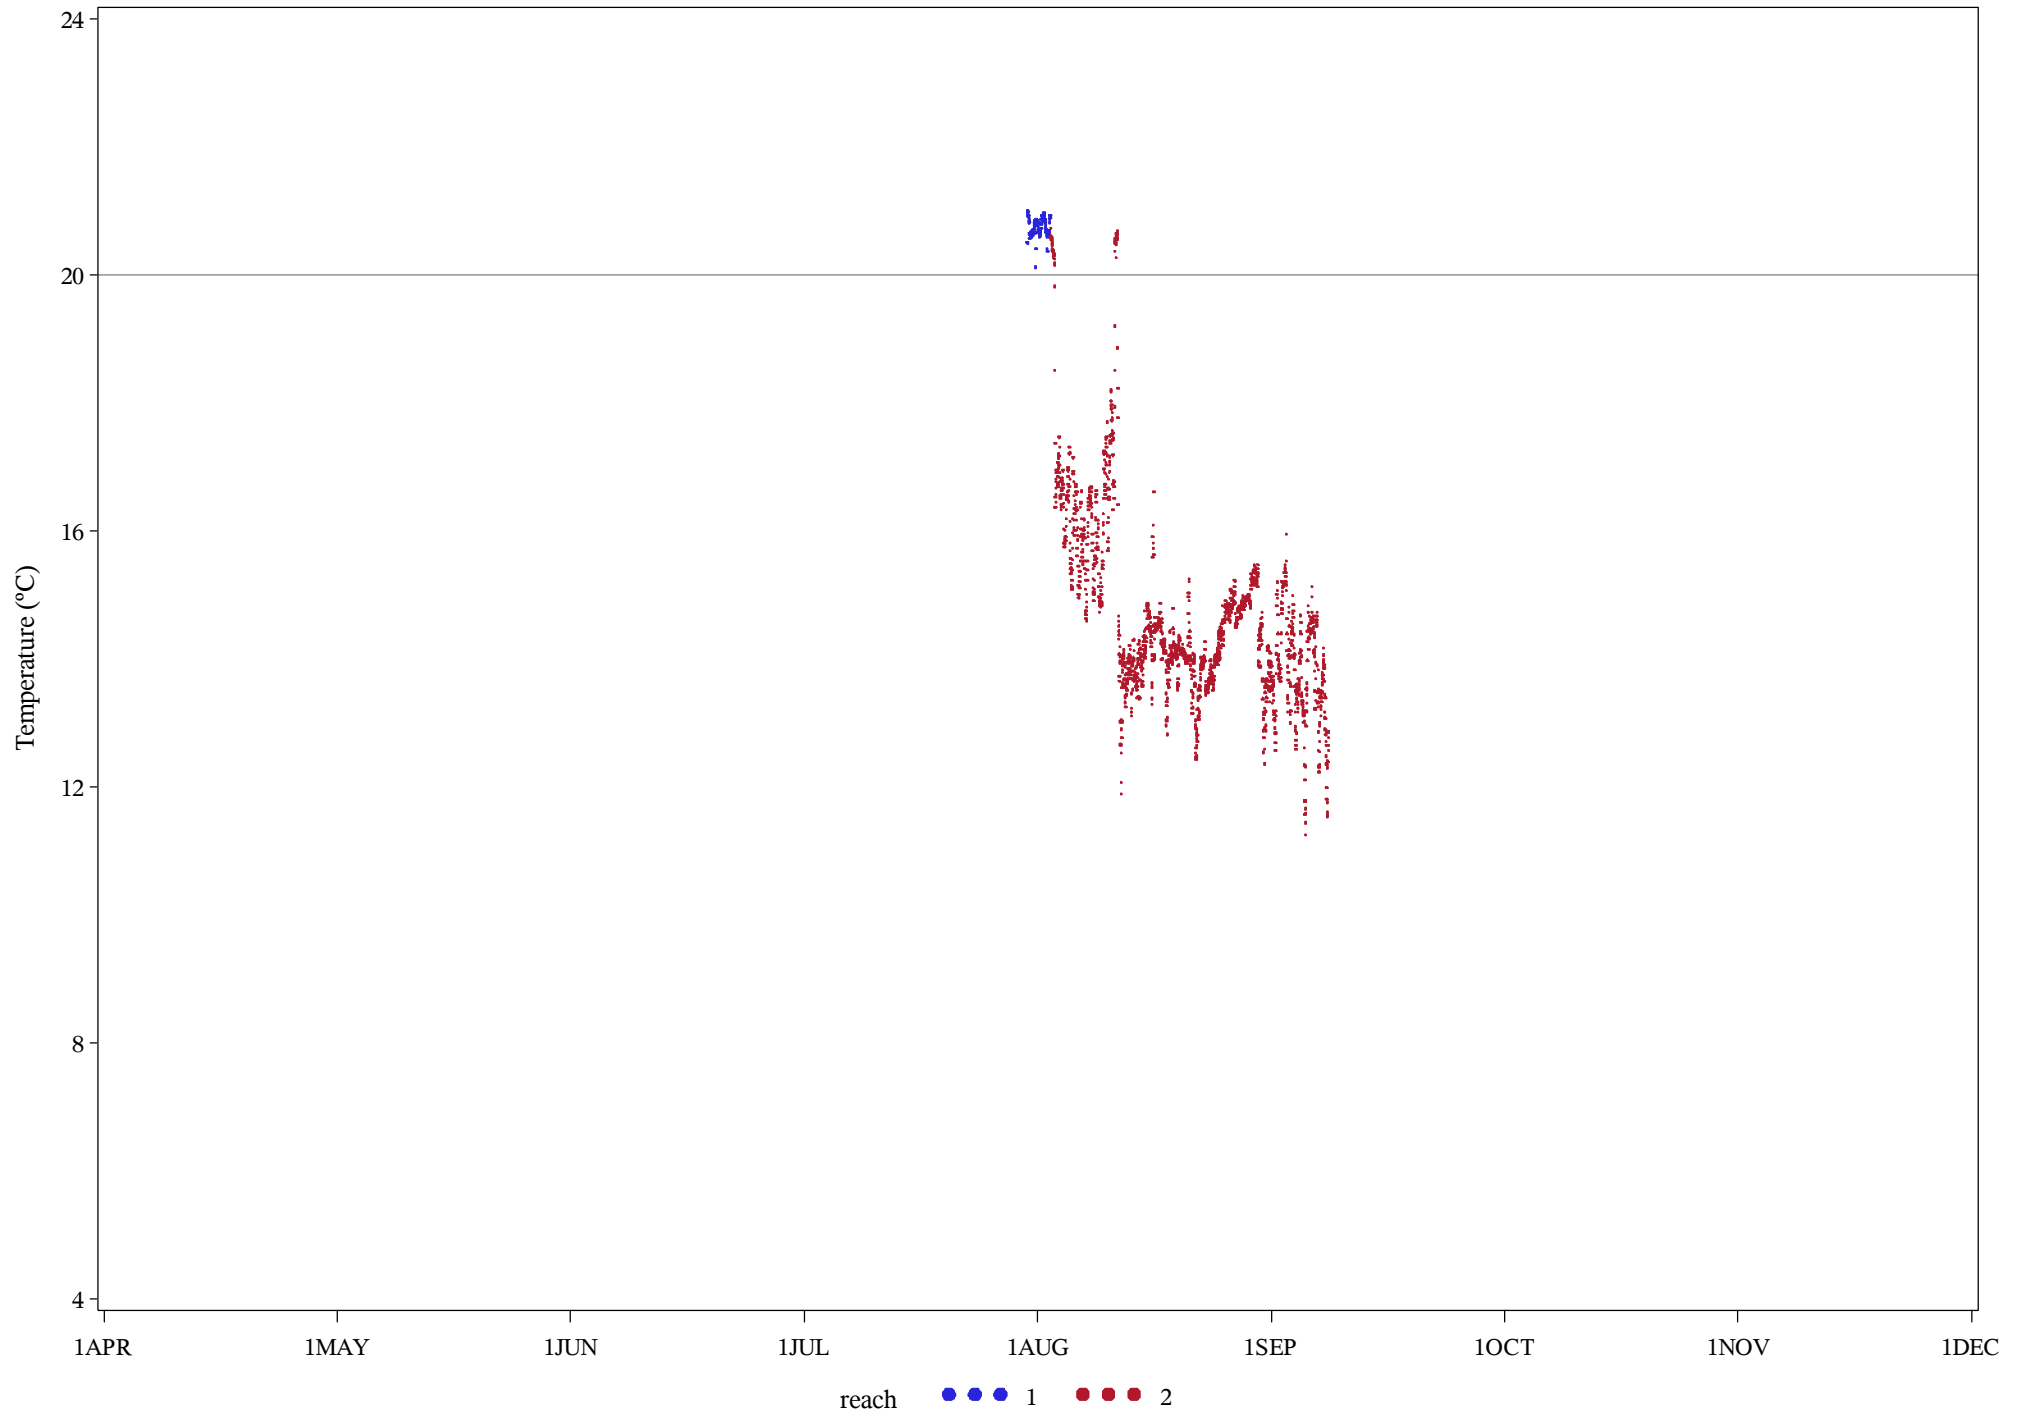

Steelhead  
4627A

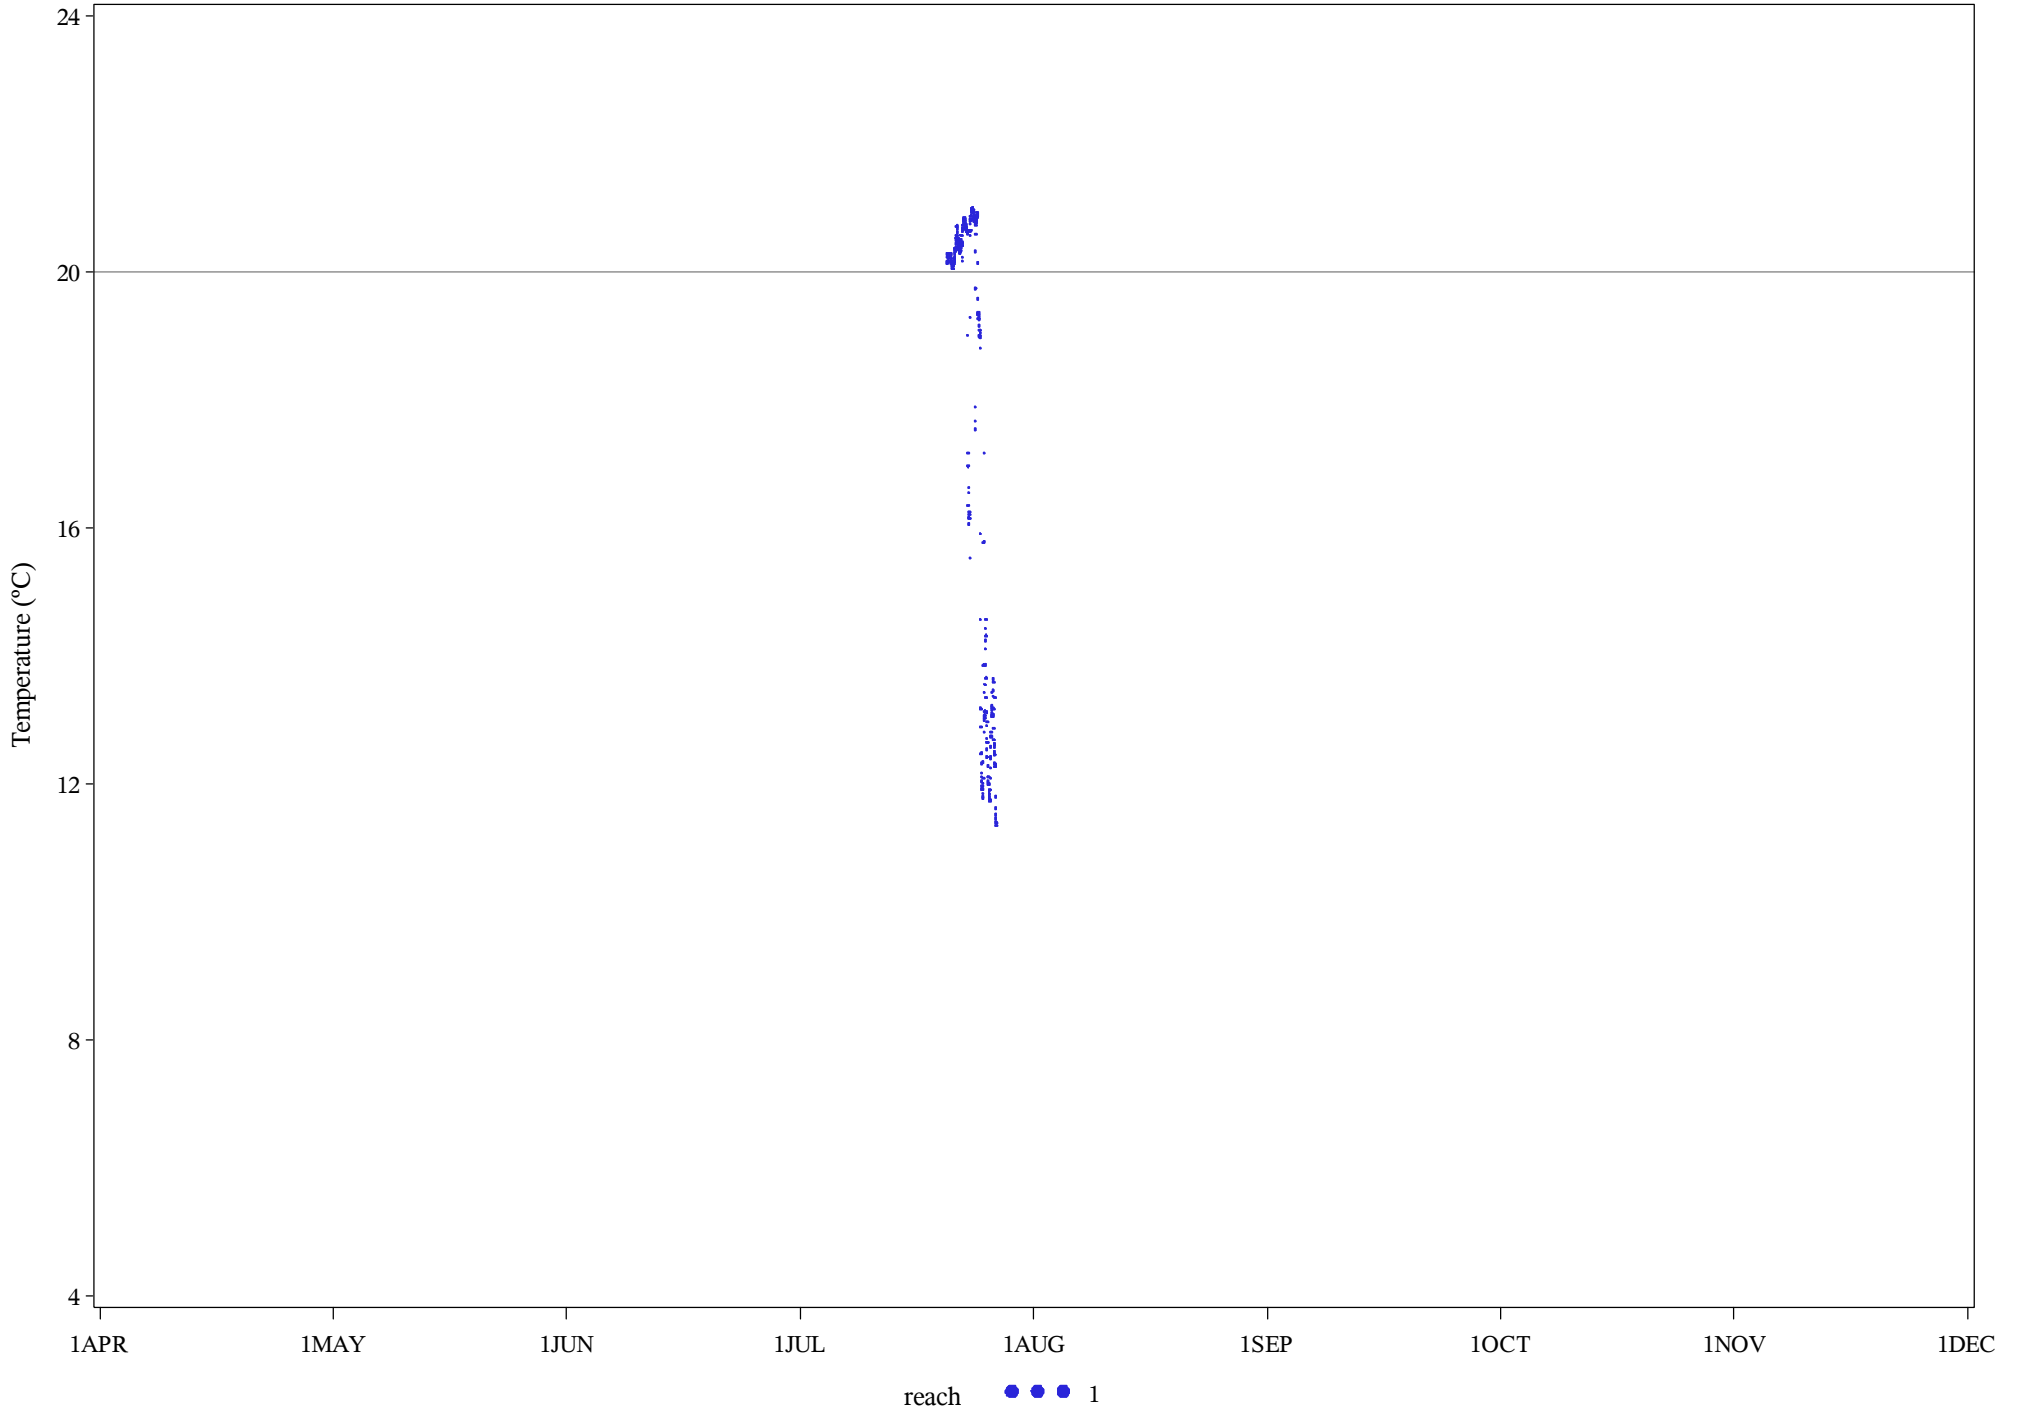



# Steelhead 4629A

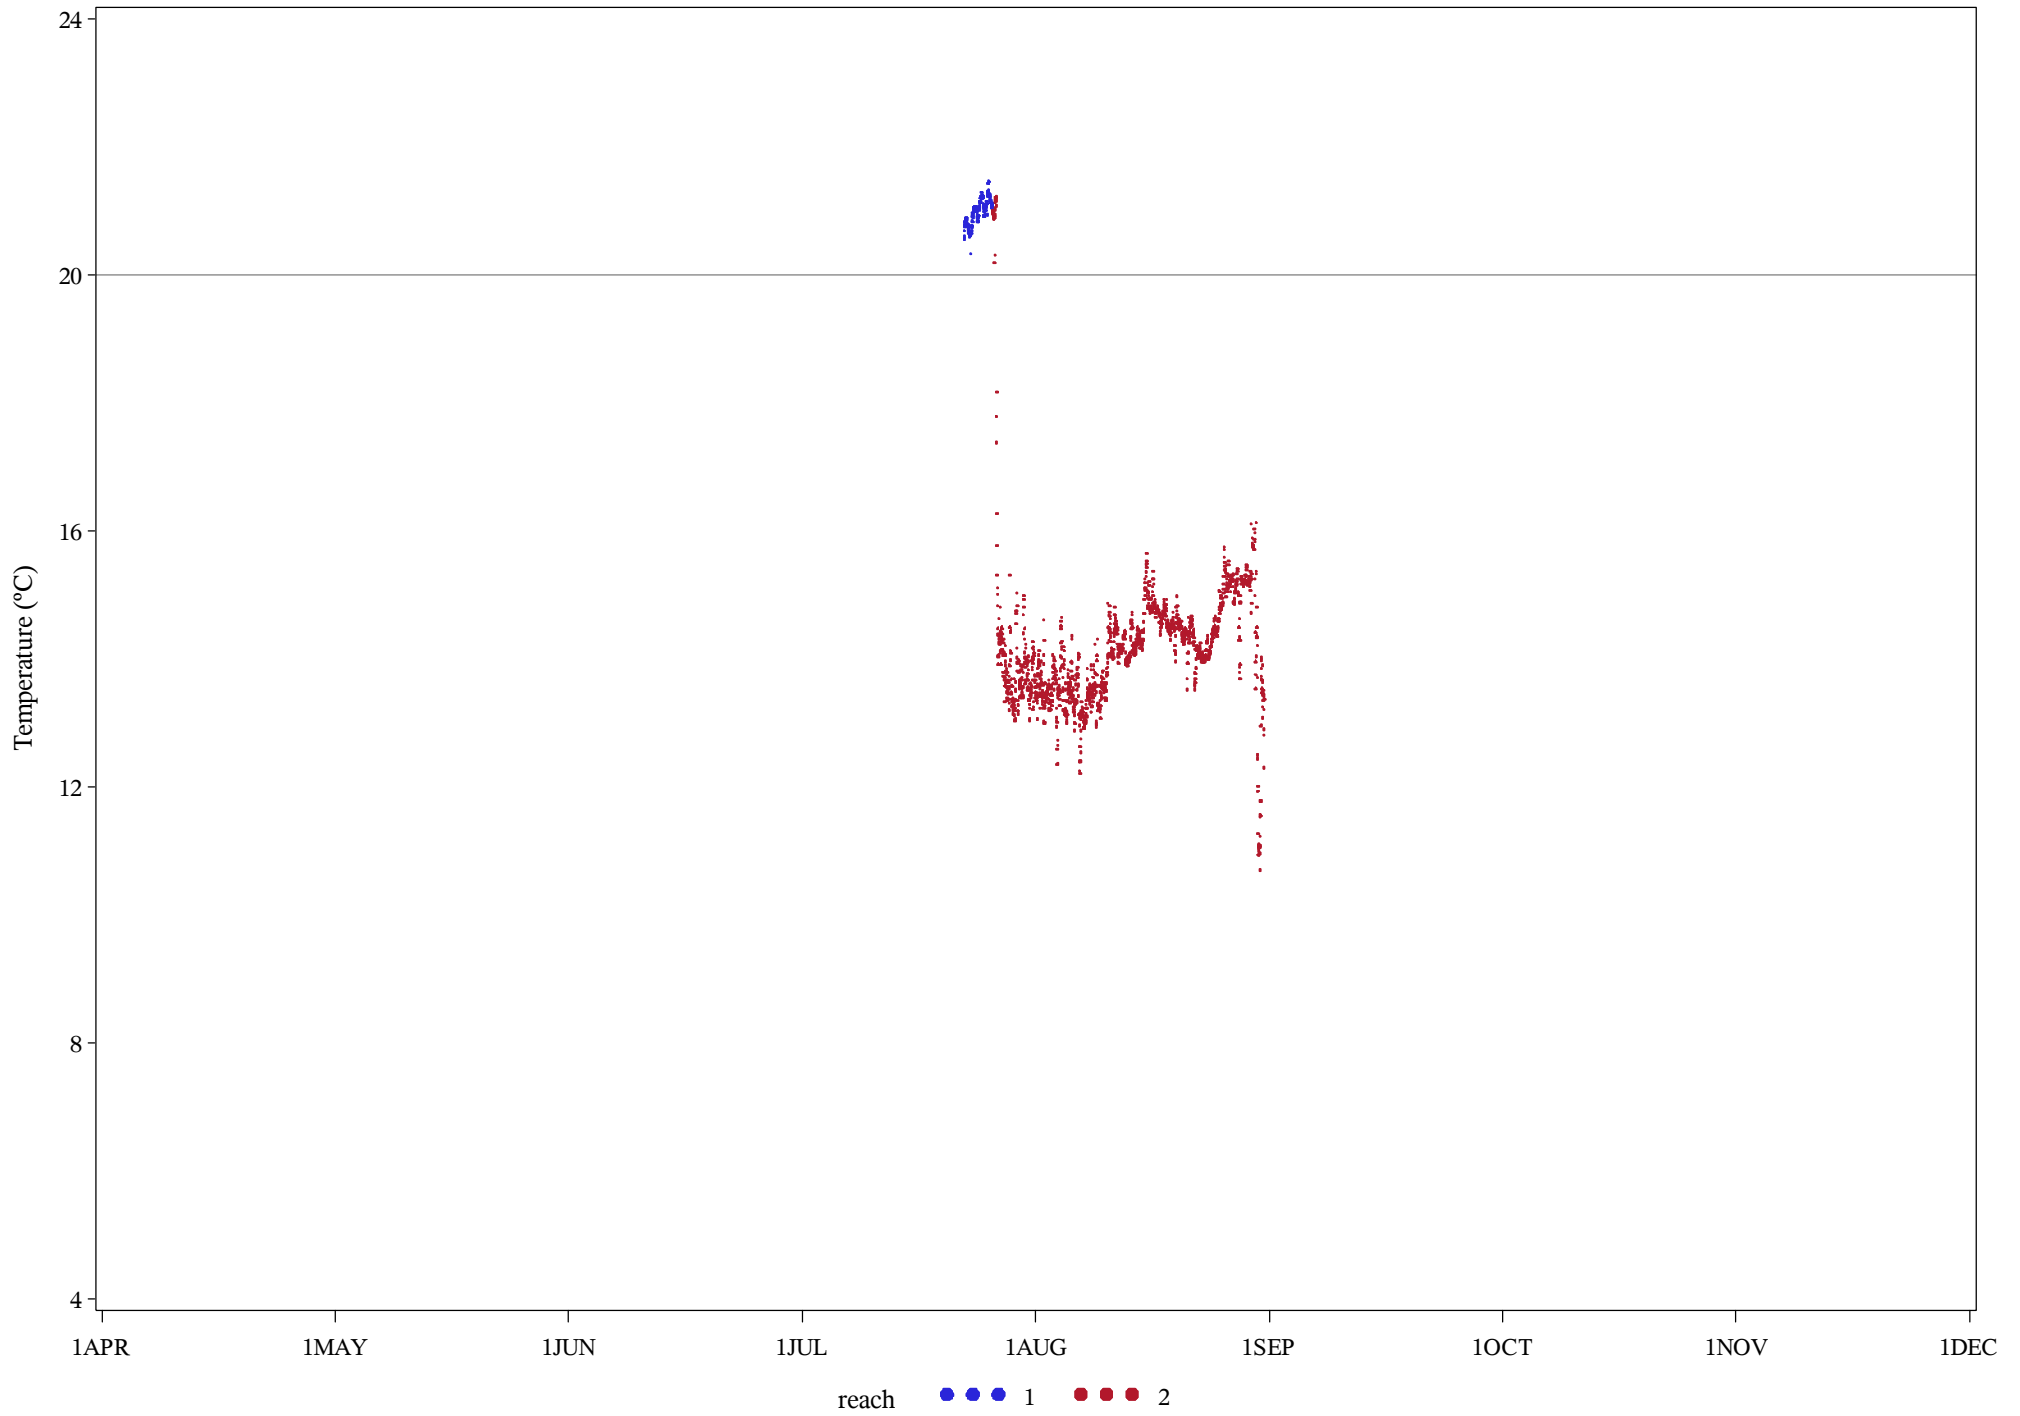

# Steelhead 4630A

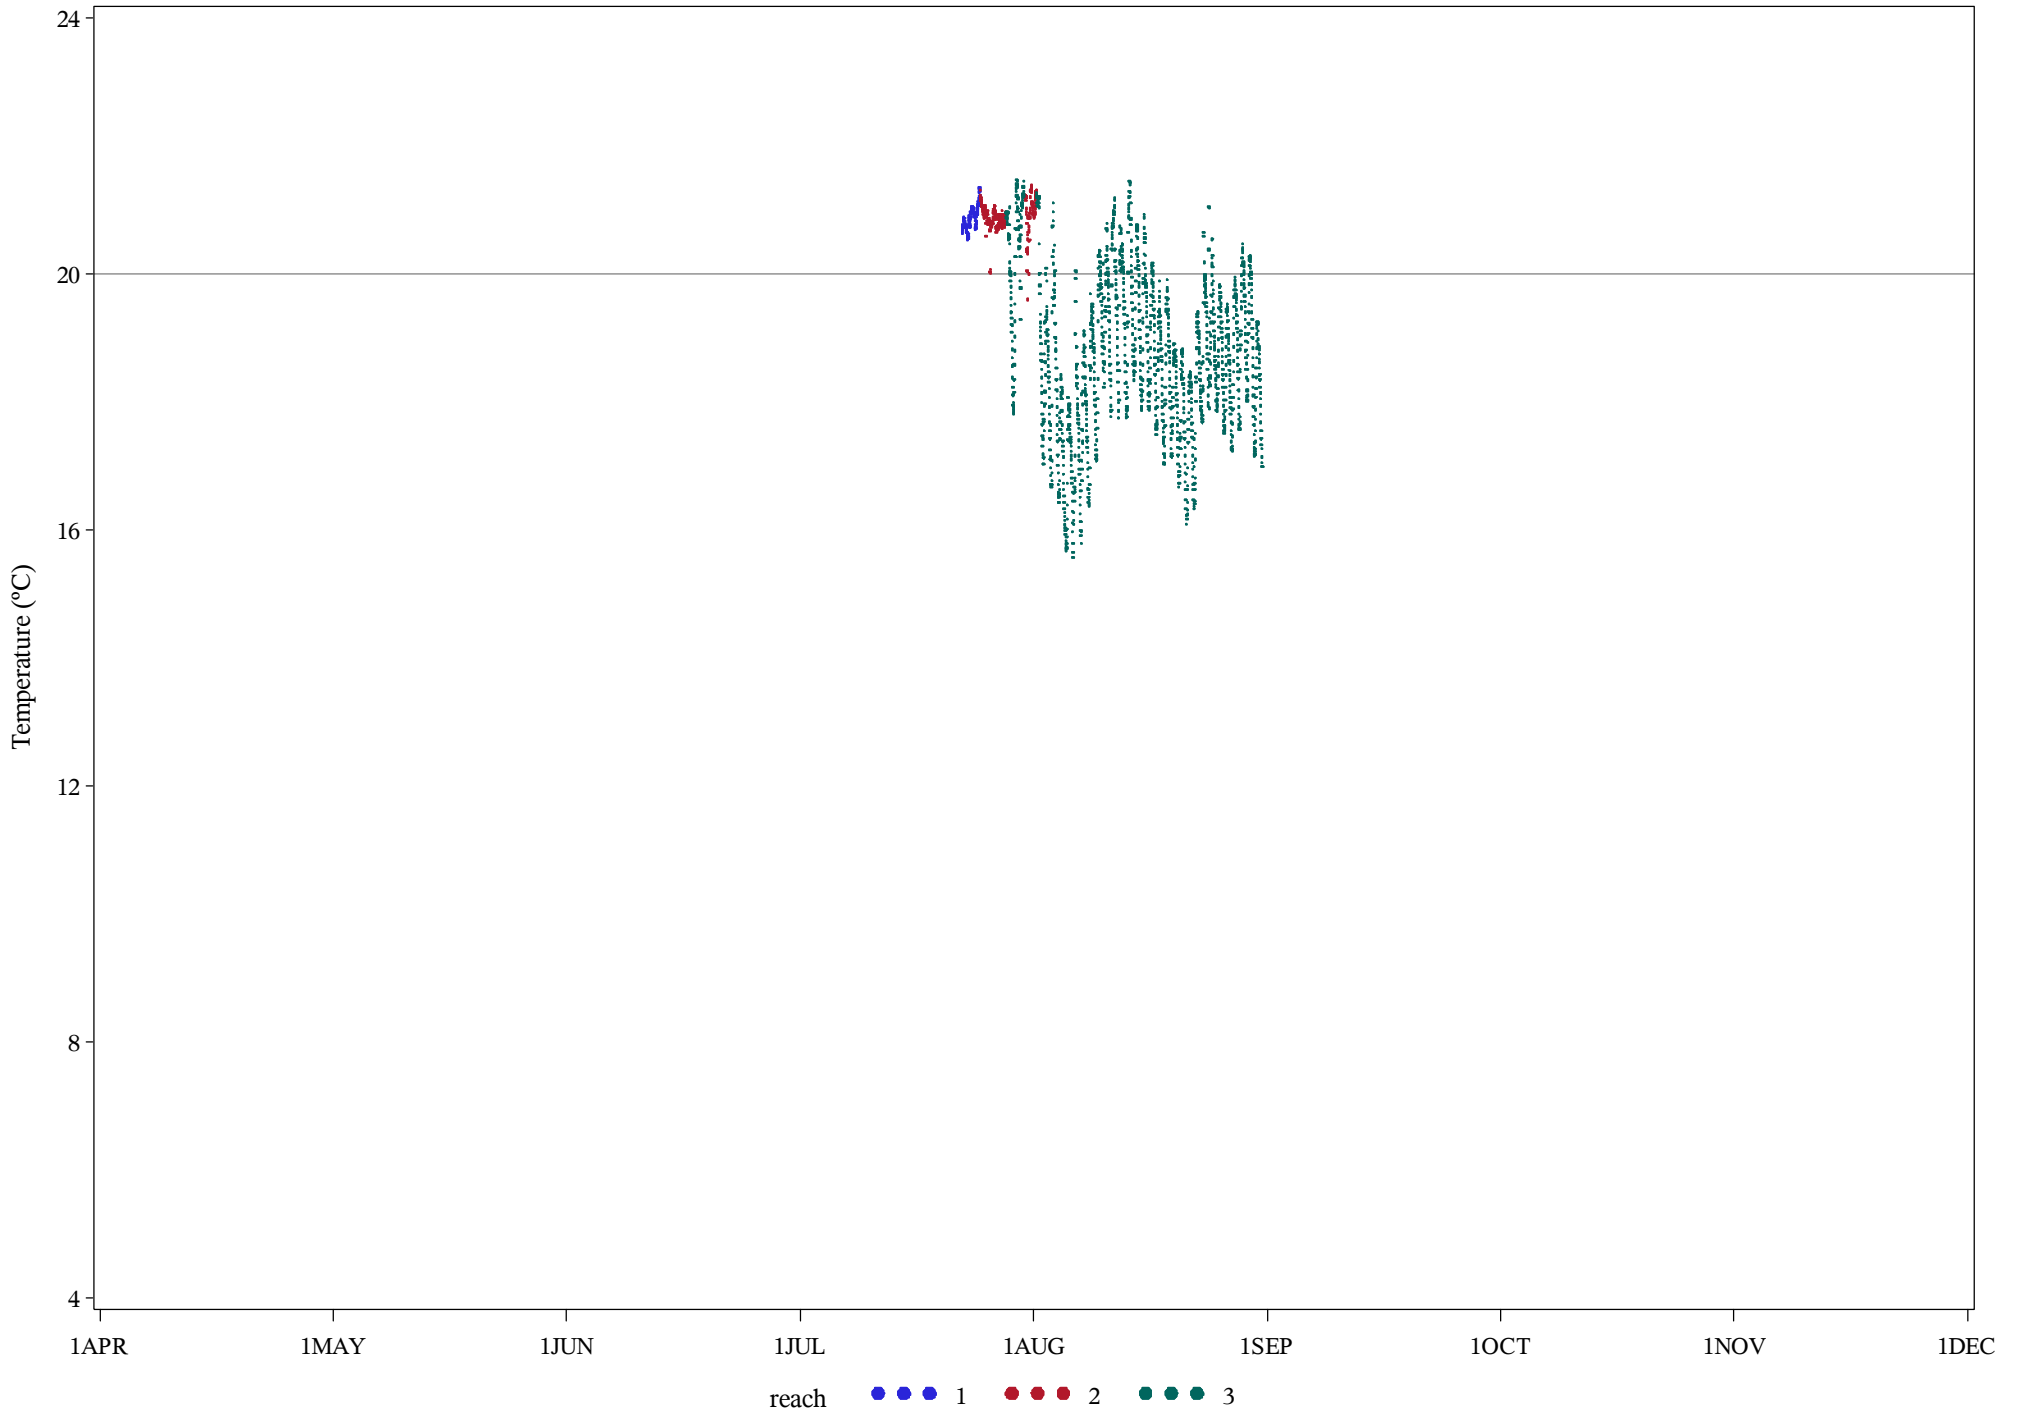

Steelhead  
4631A

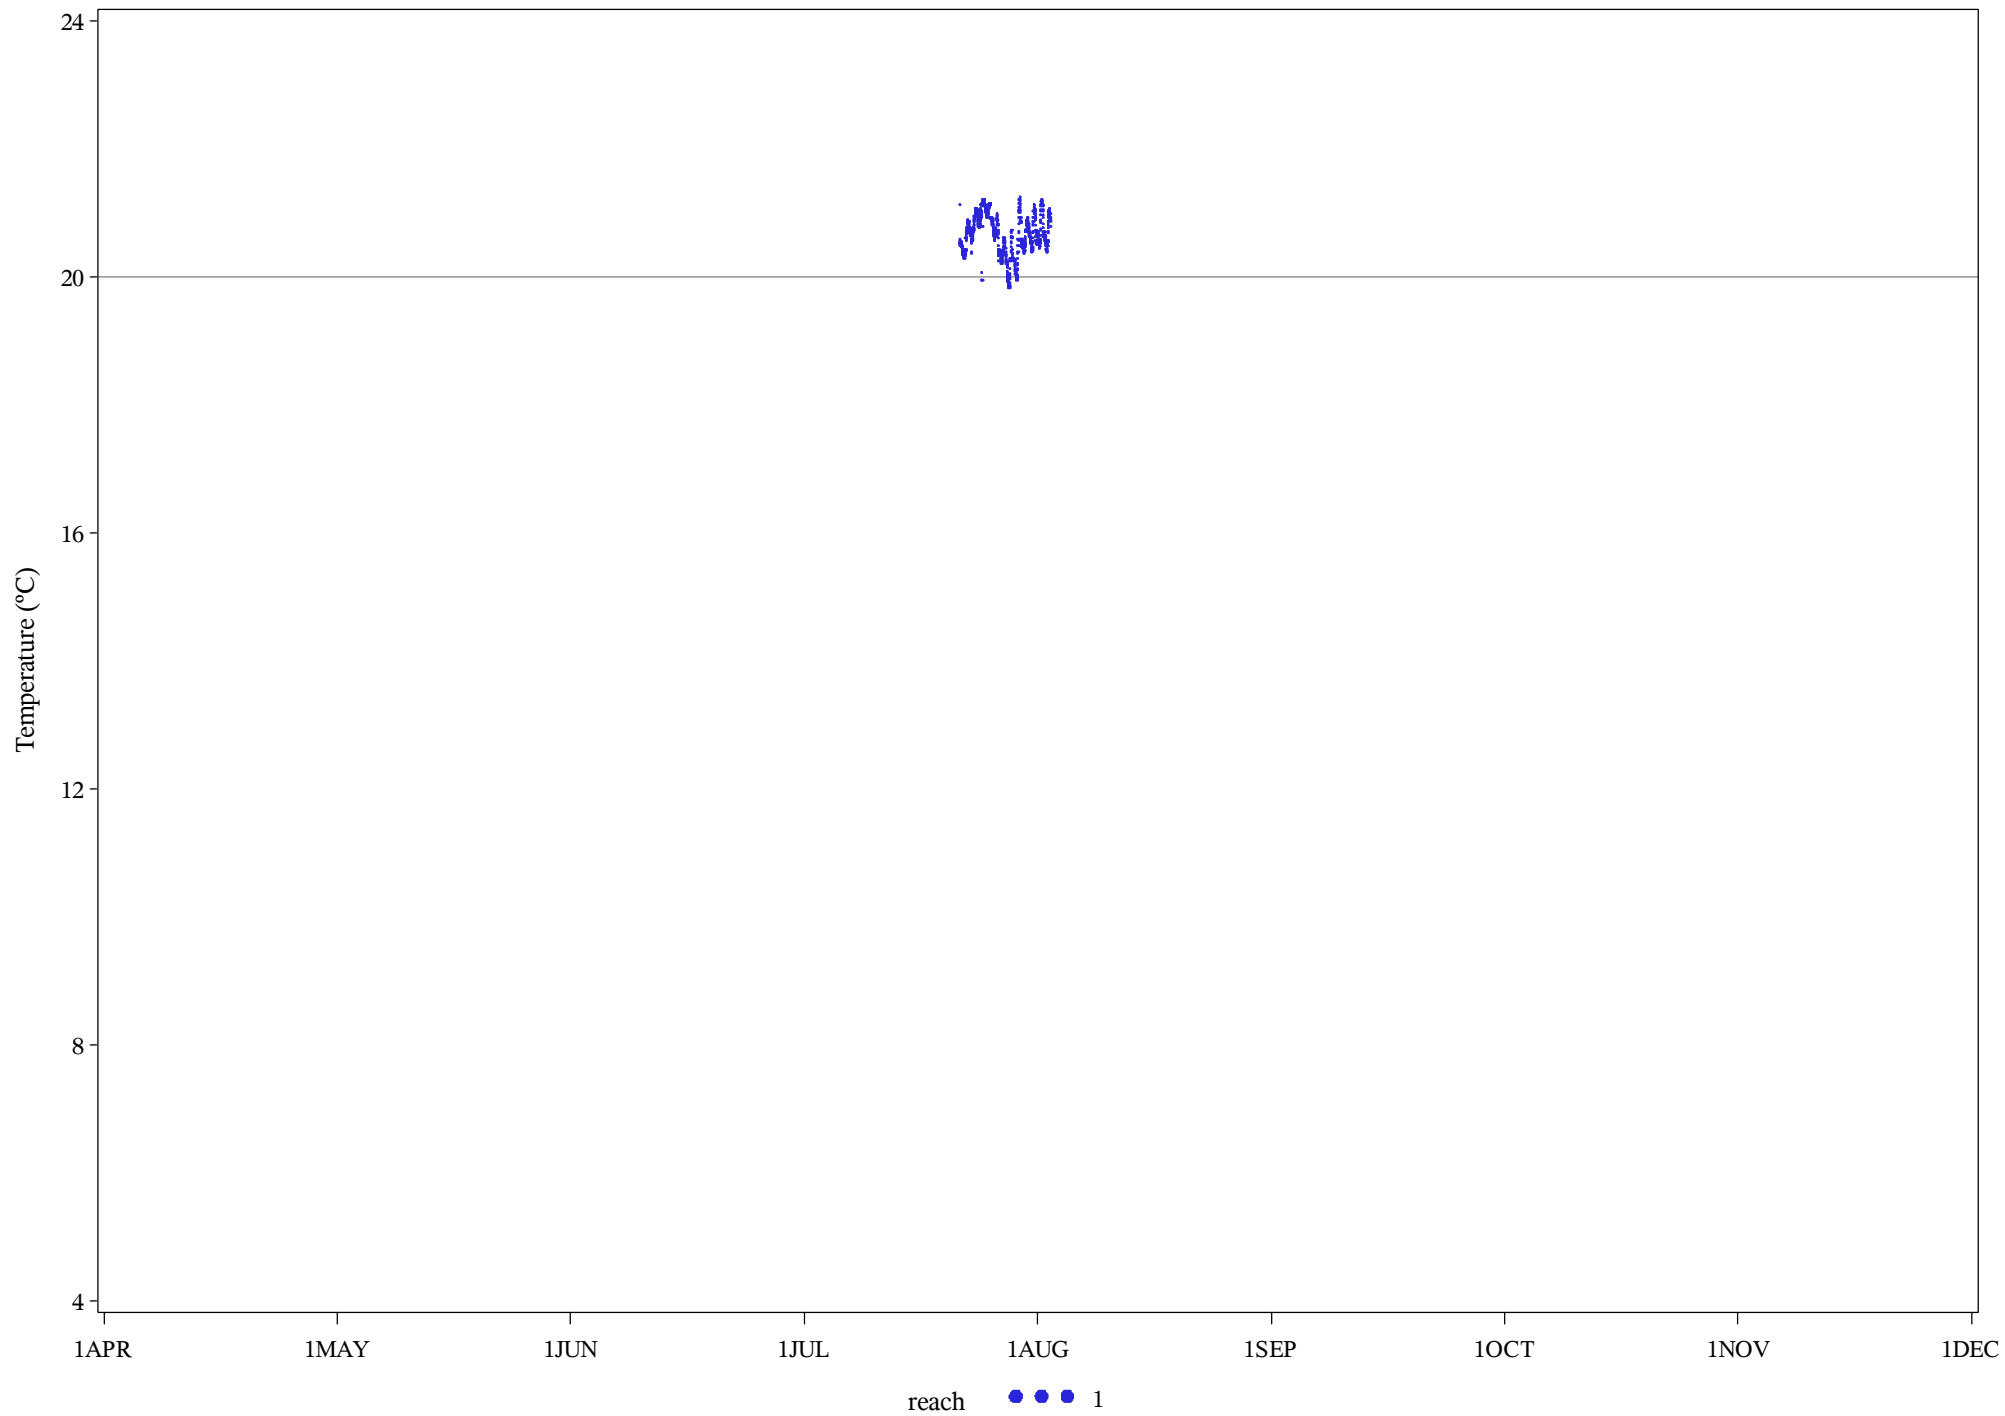

Steelhead  
4634A

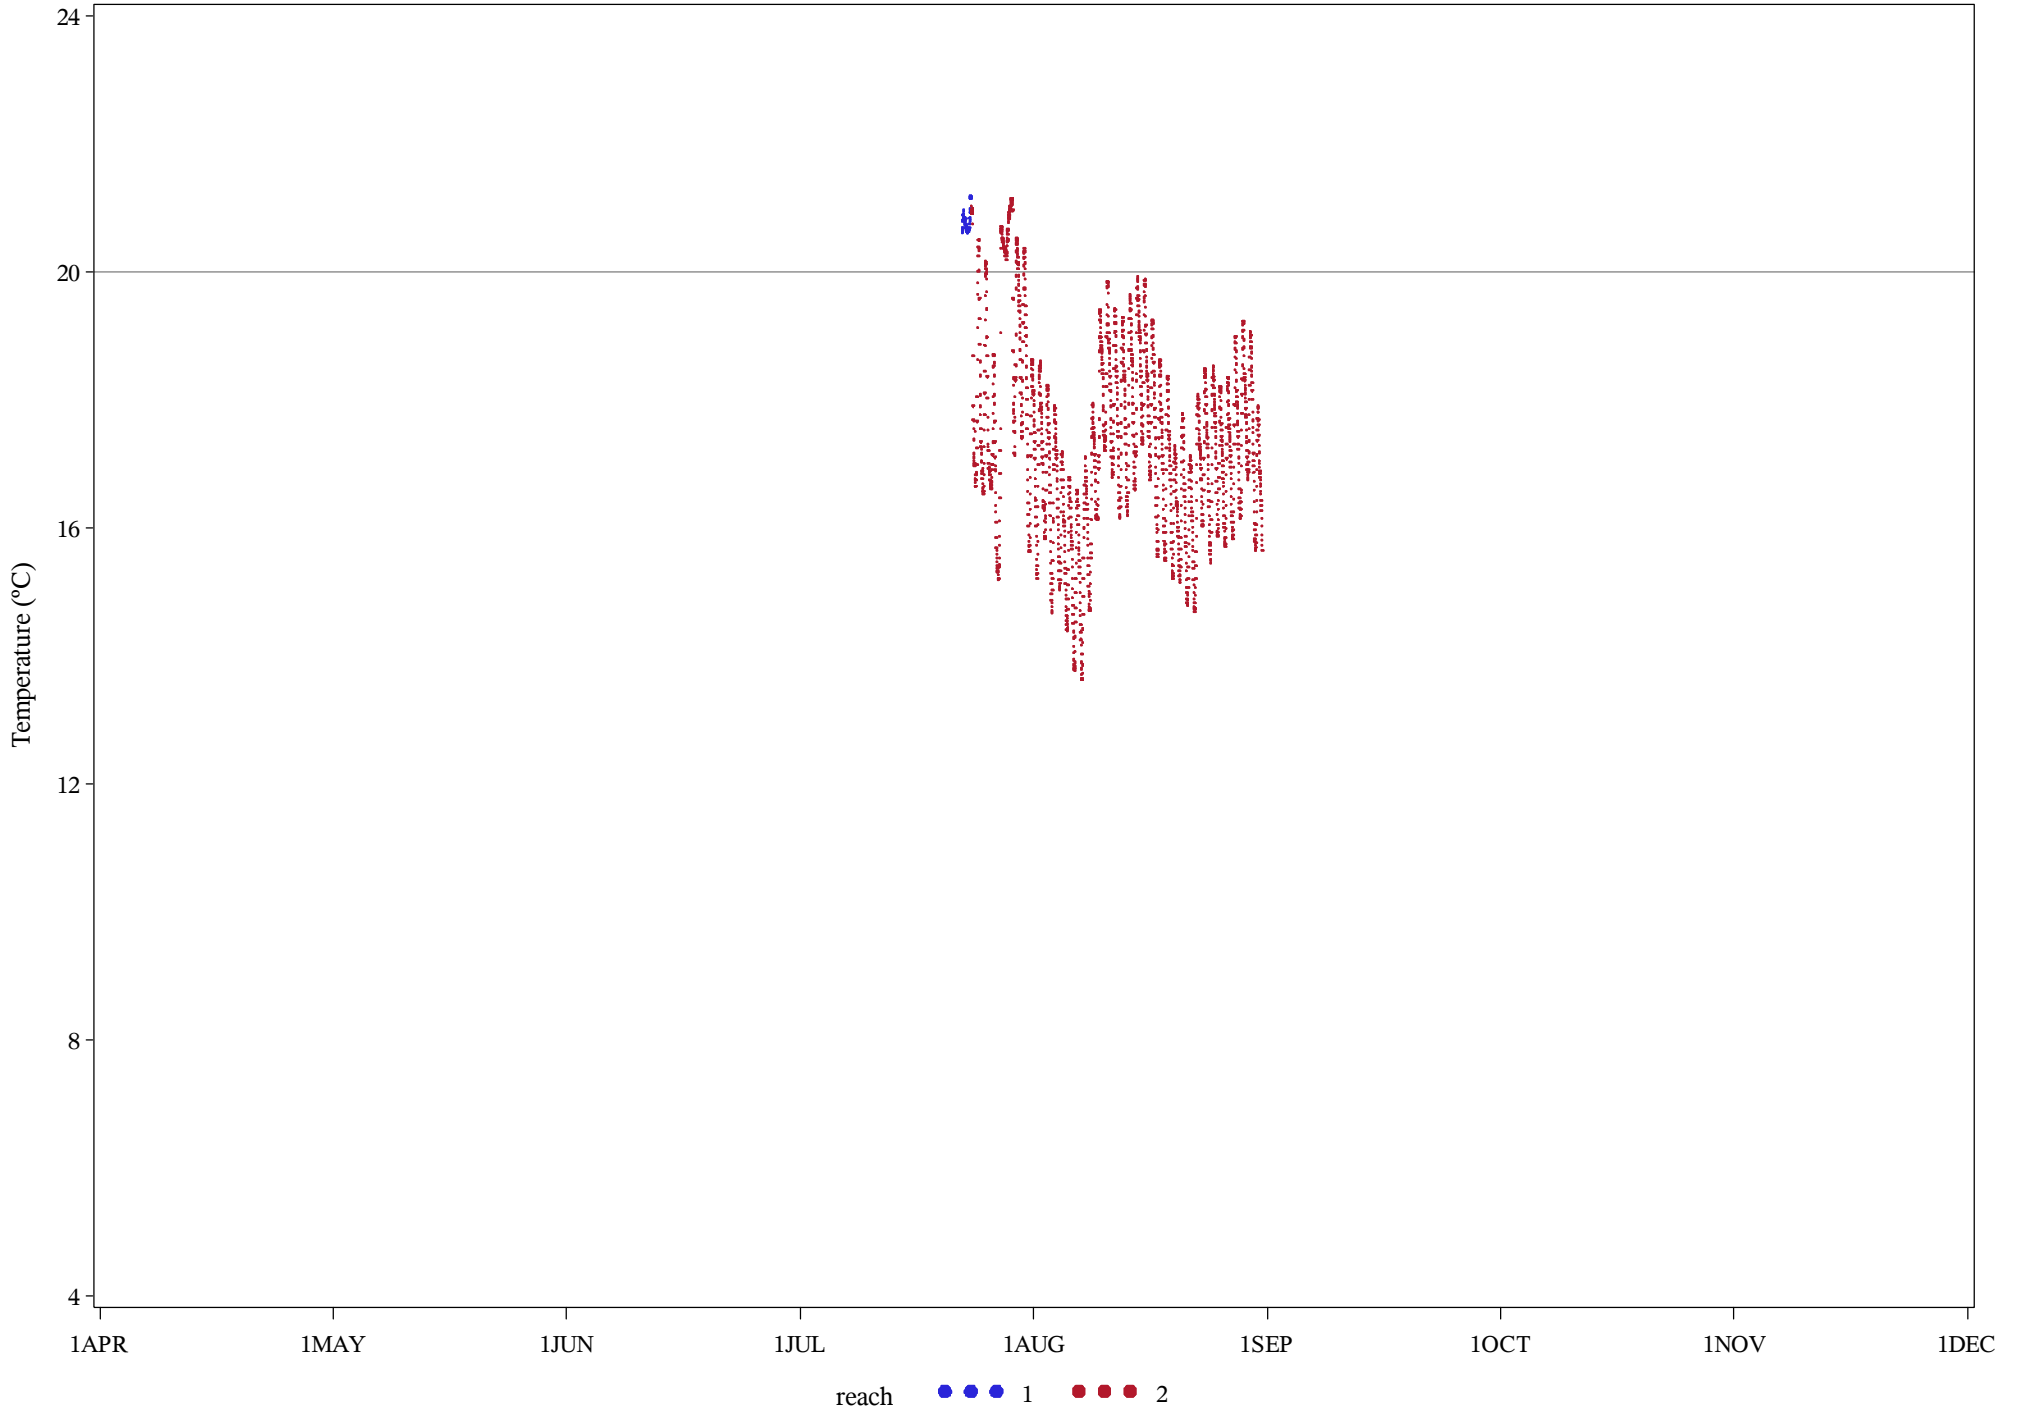

Steelhead  
4637A

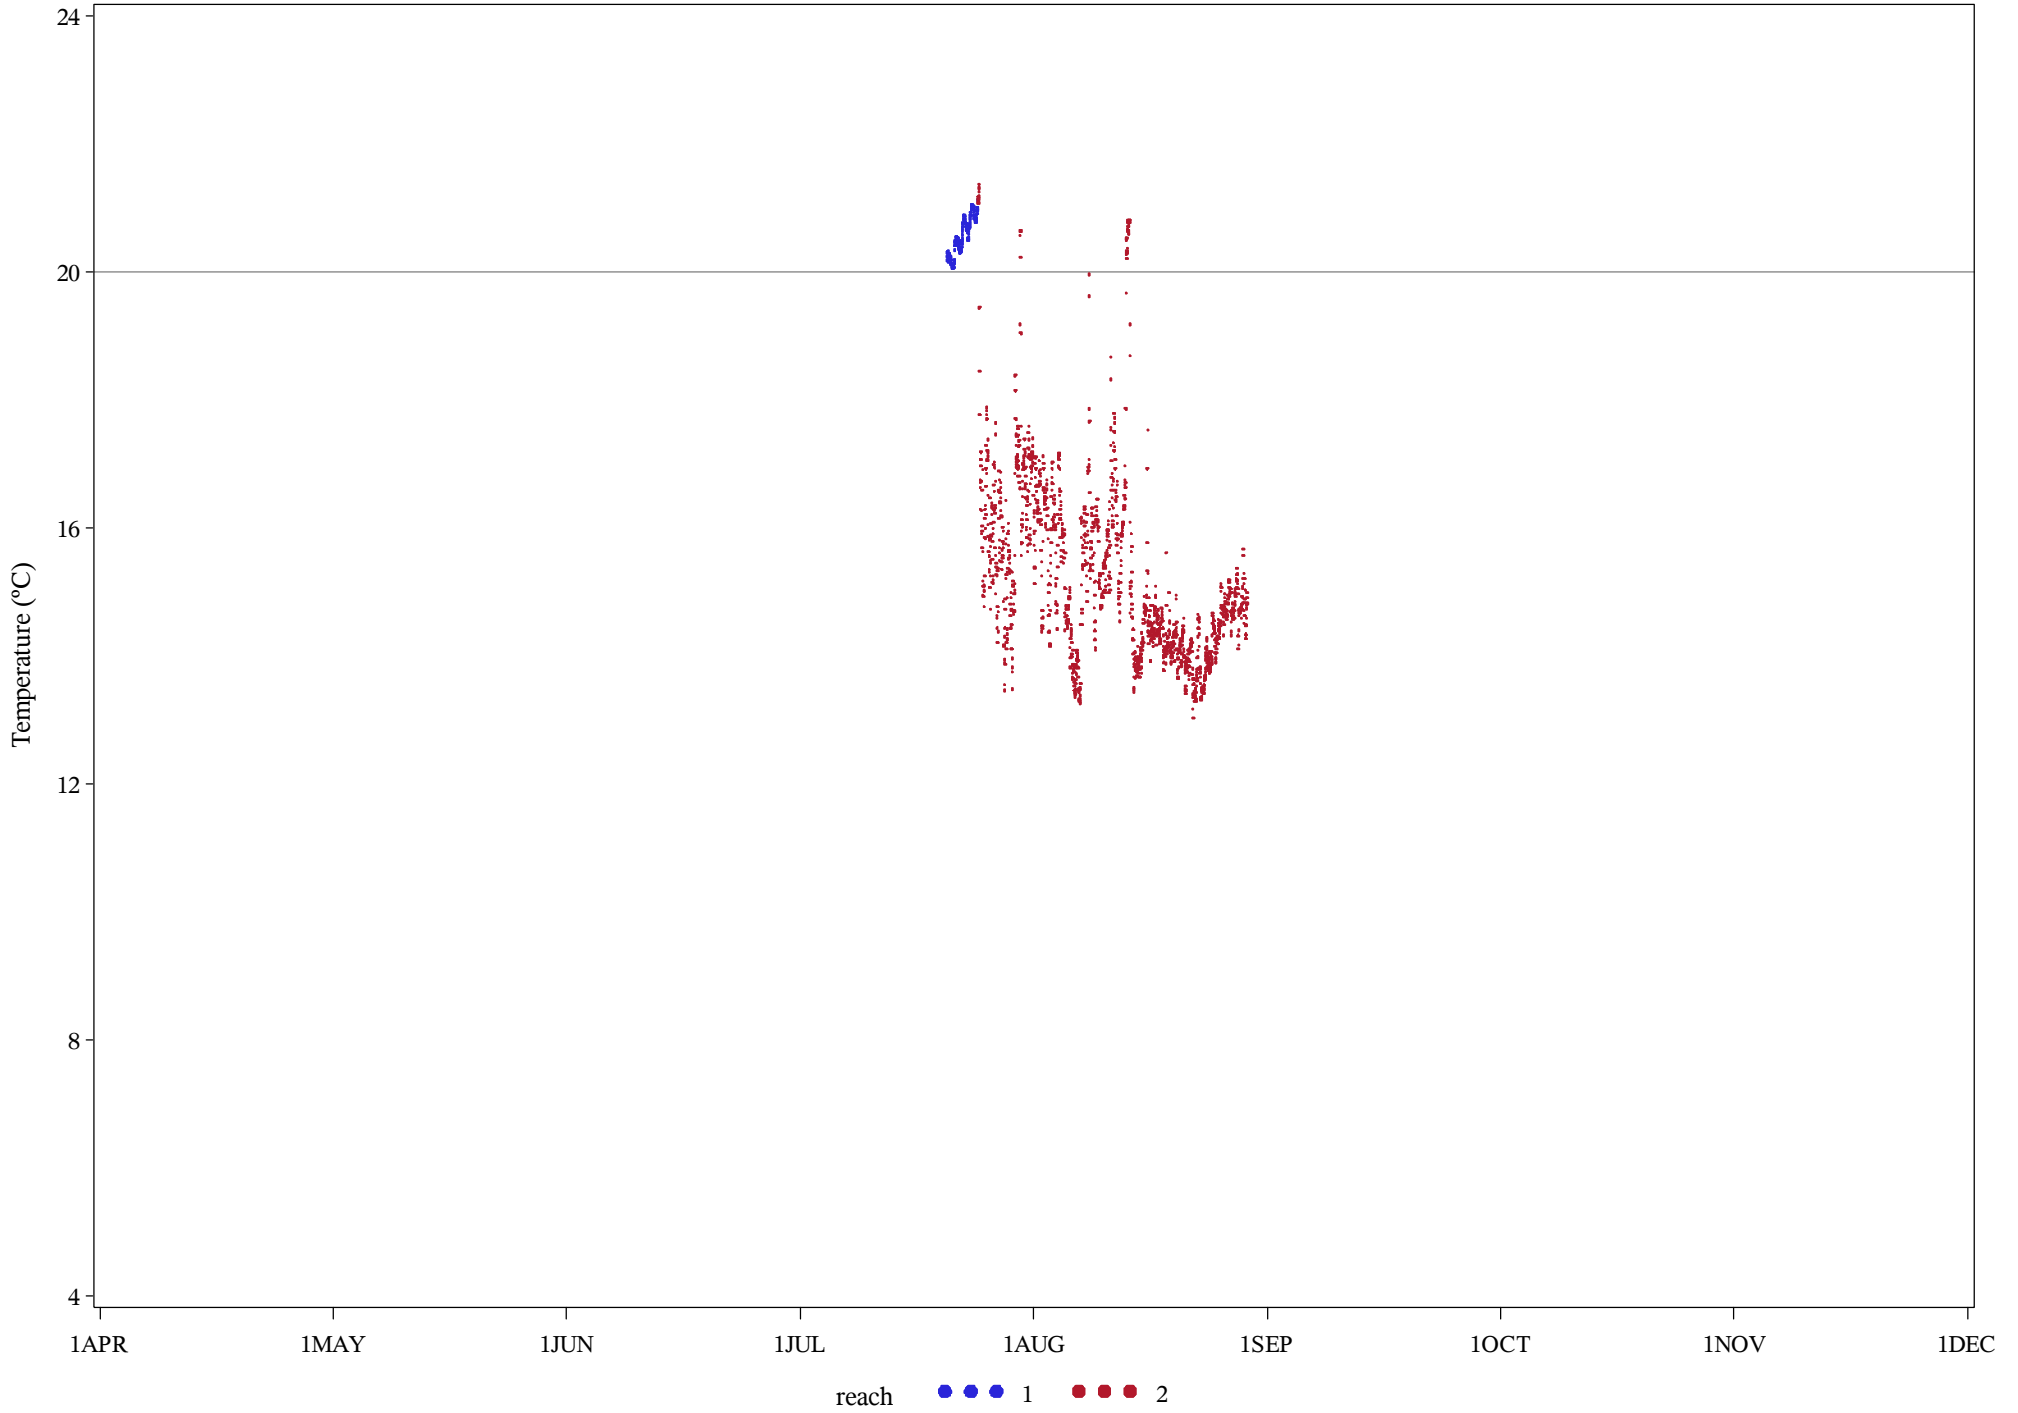

**Steelhead  
4638A**

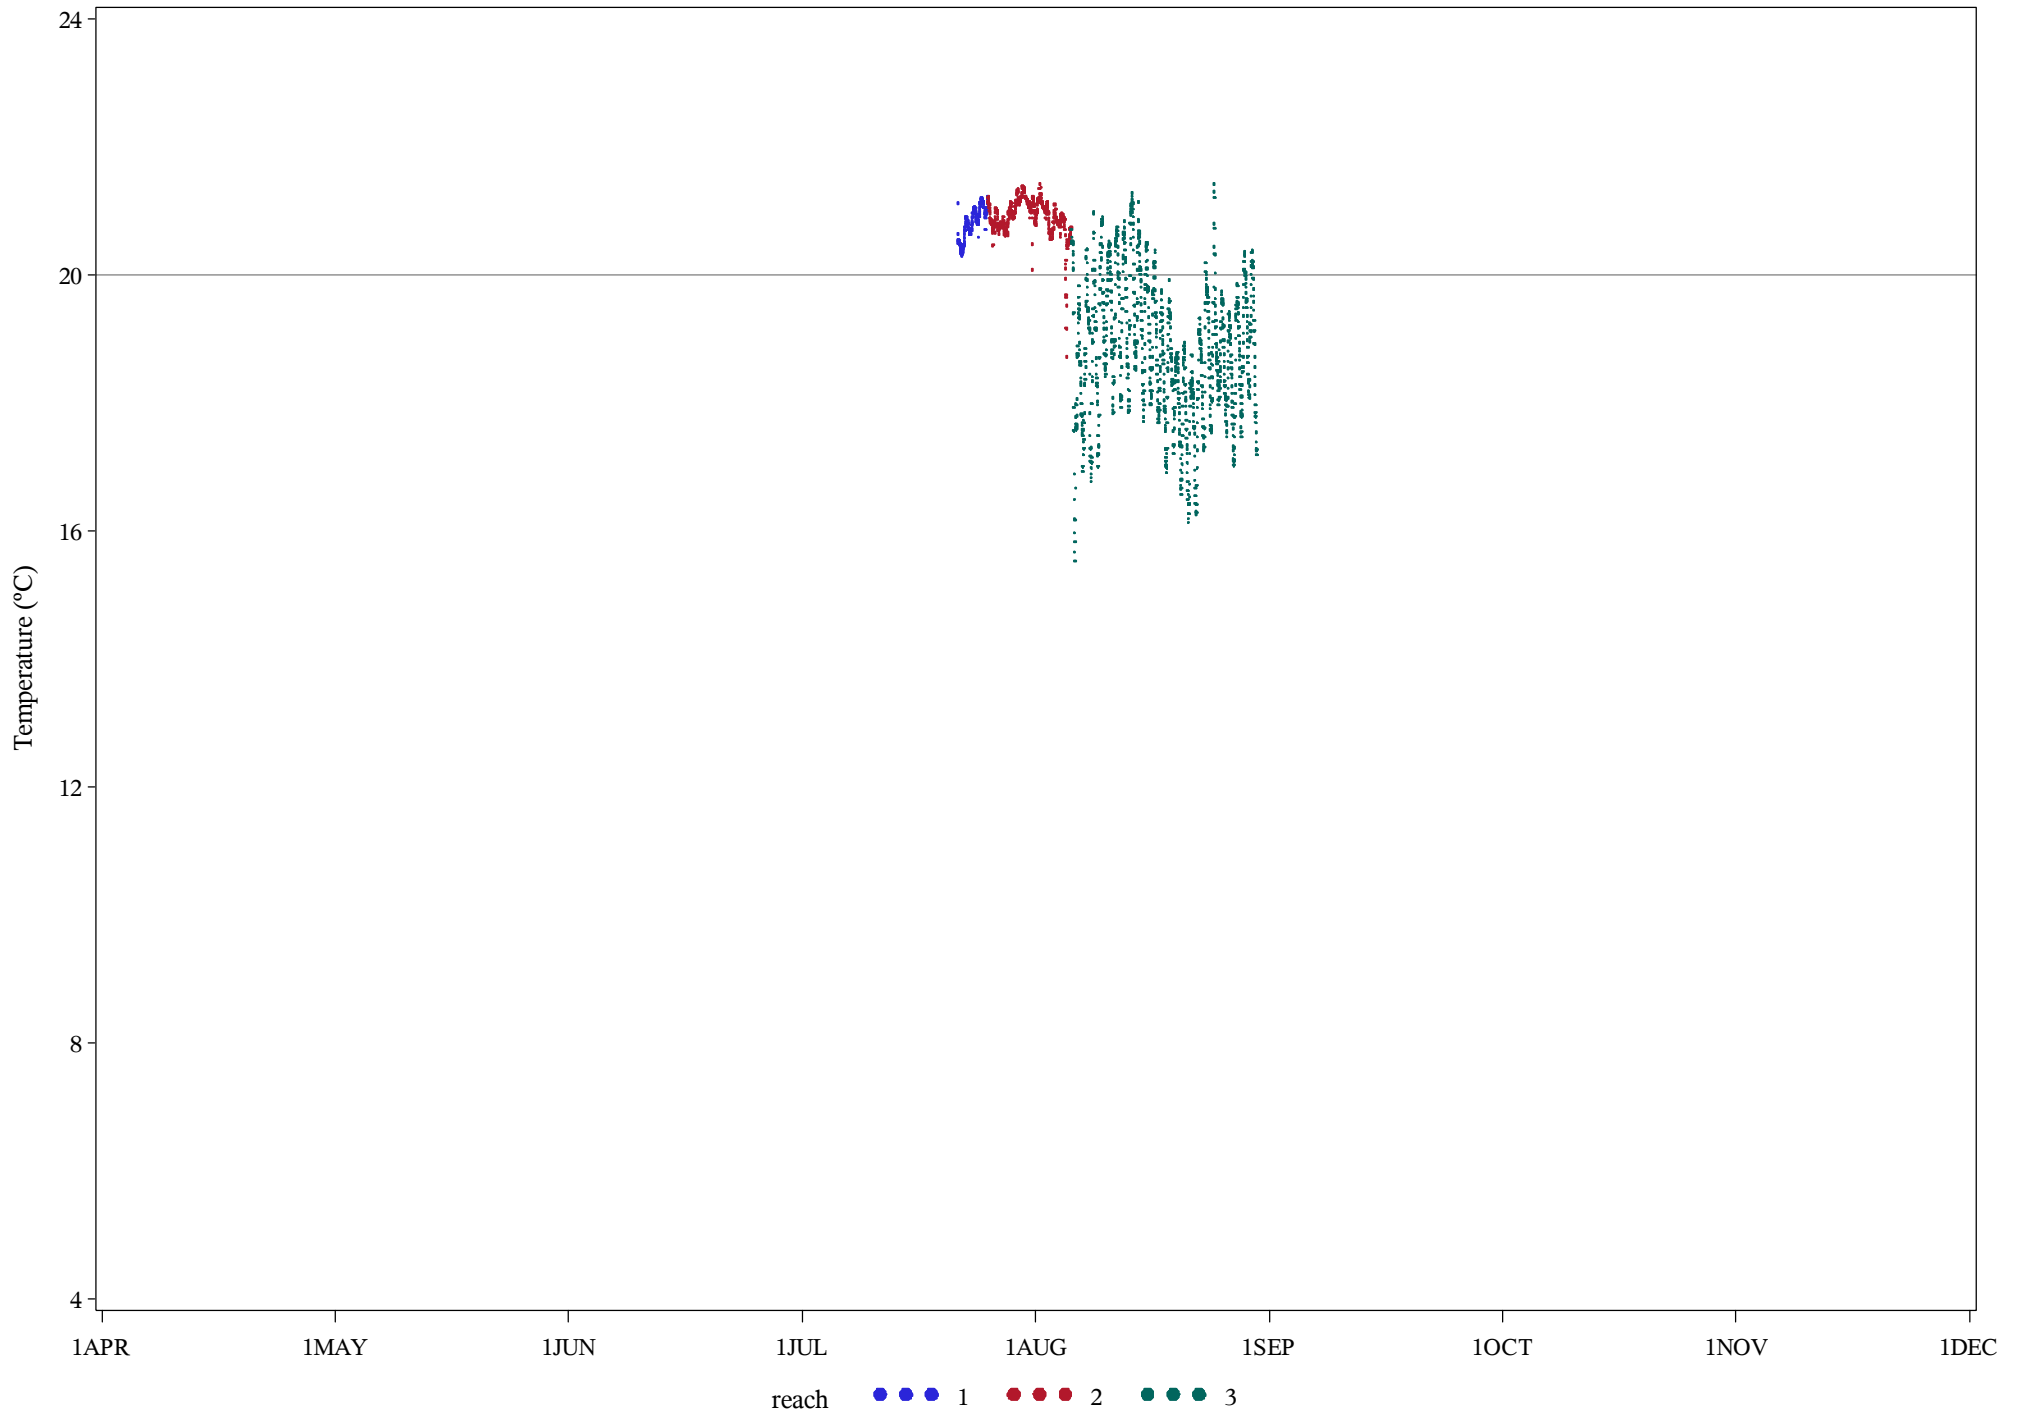

# Steelhead 4639A

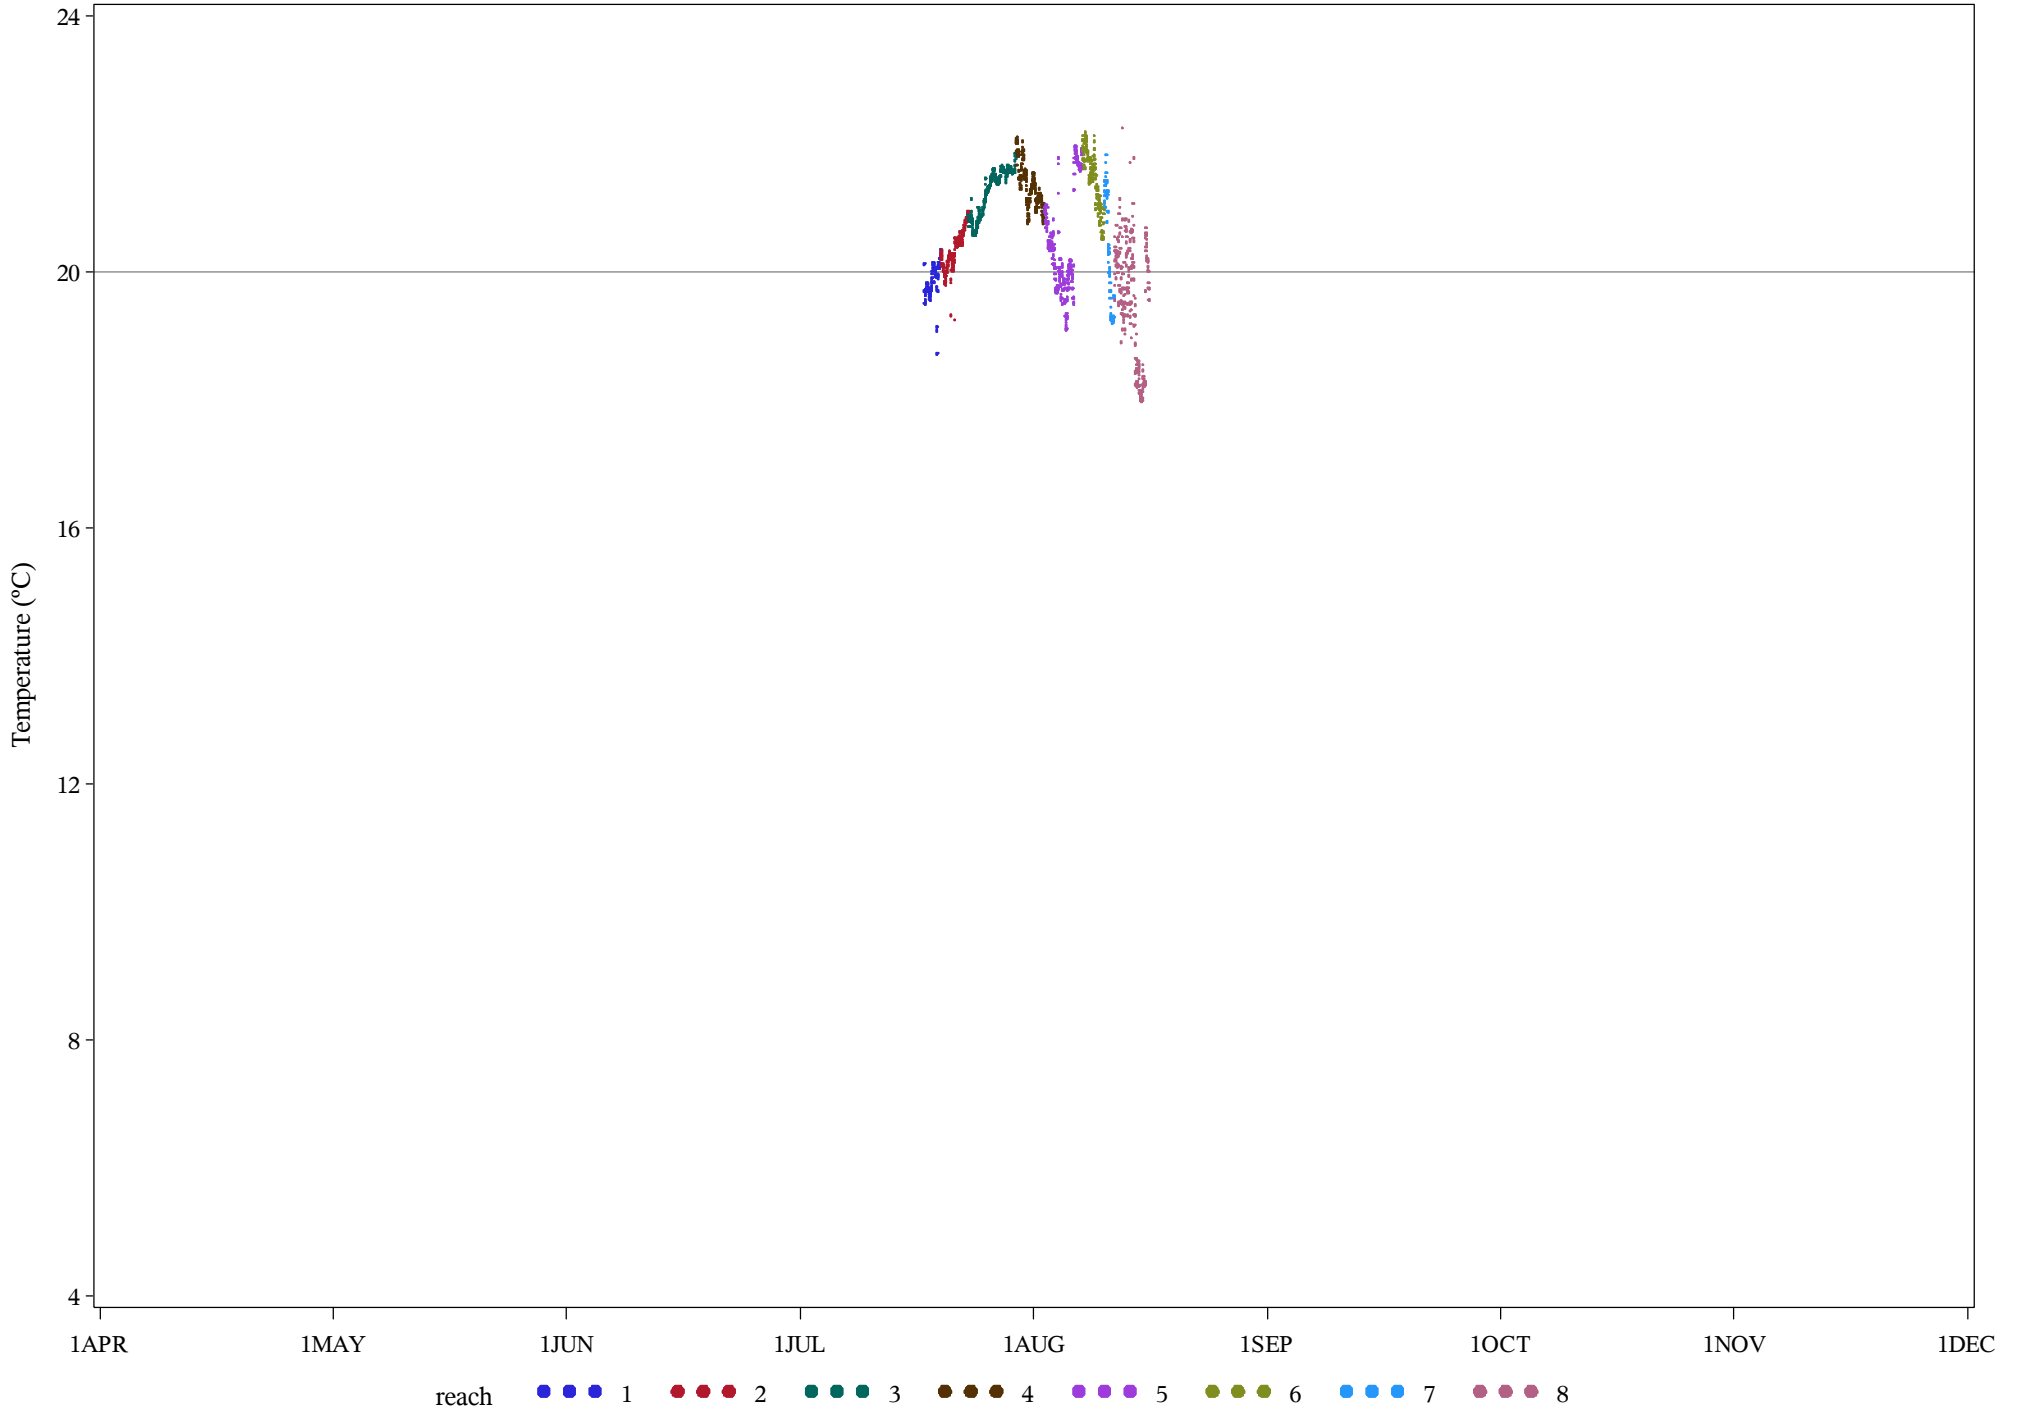

**Steelhead  
4639B**

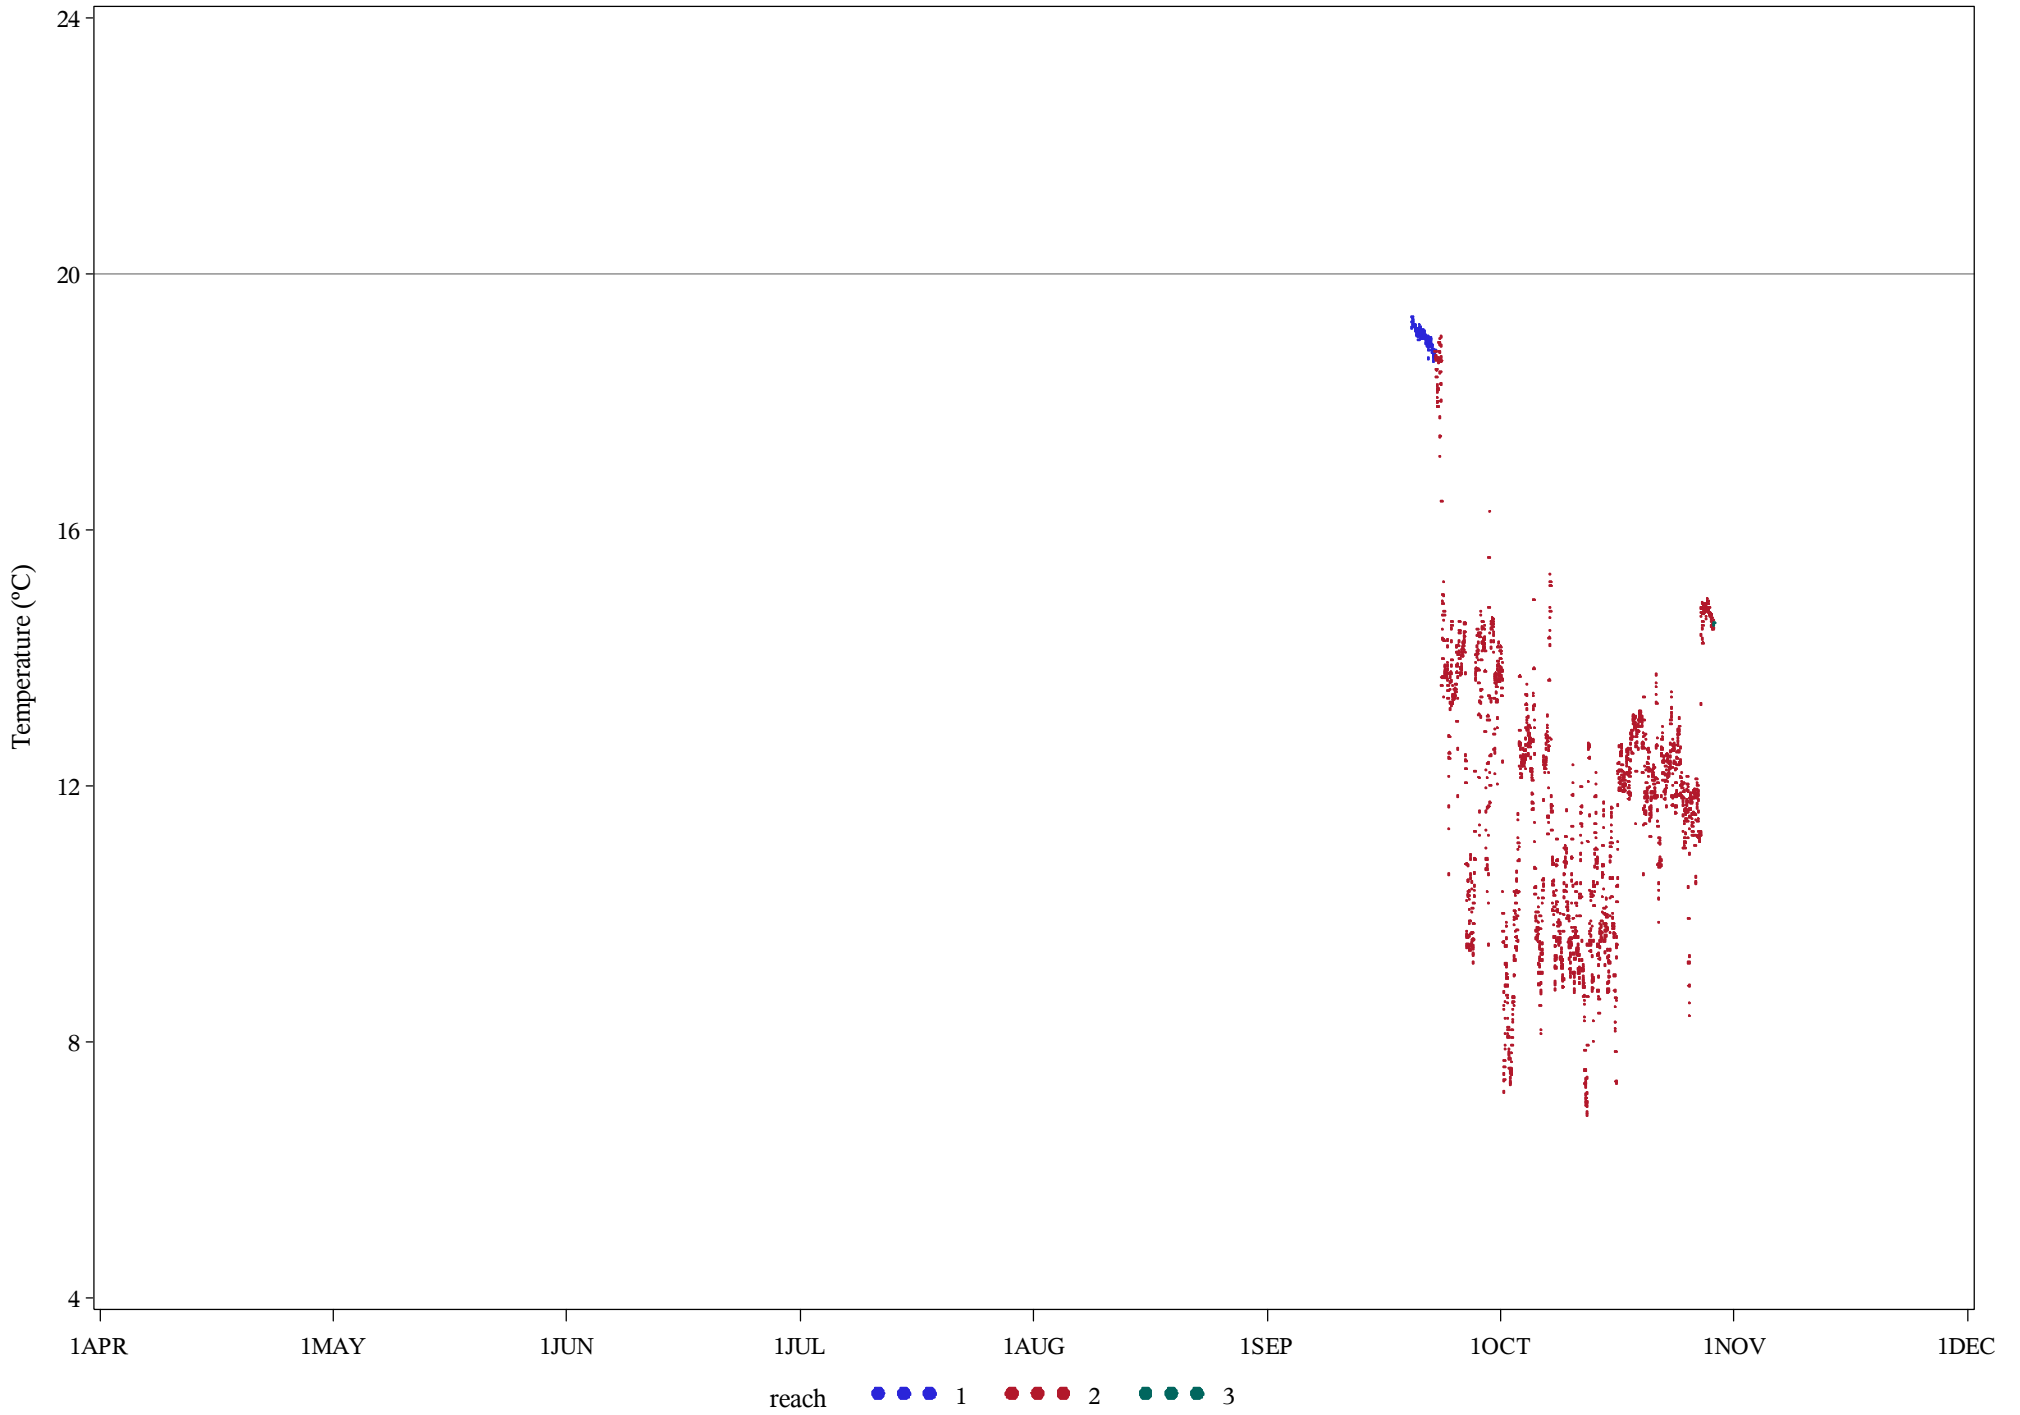



# Steelhead 4640A

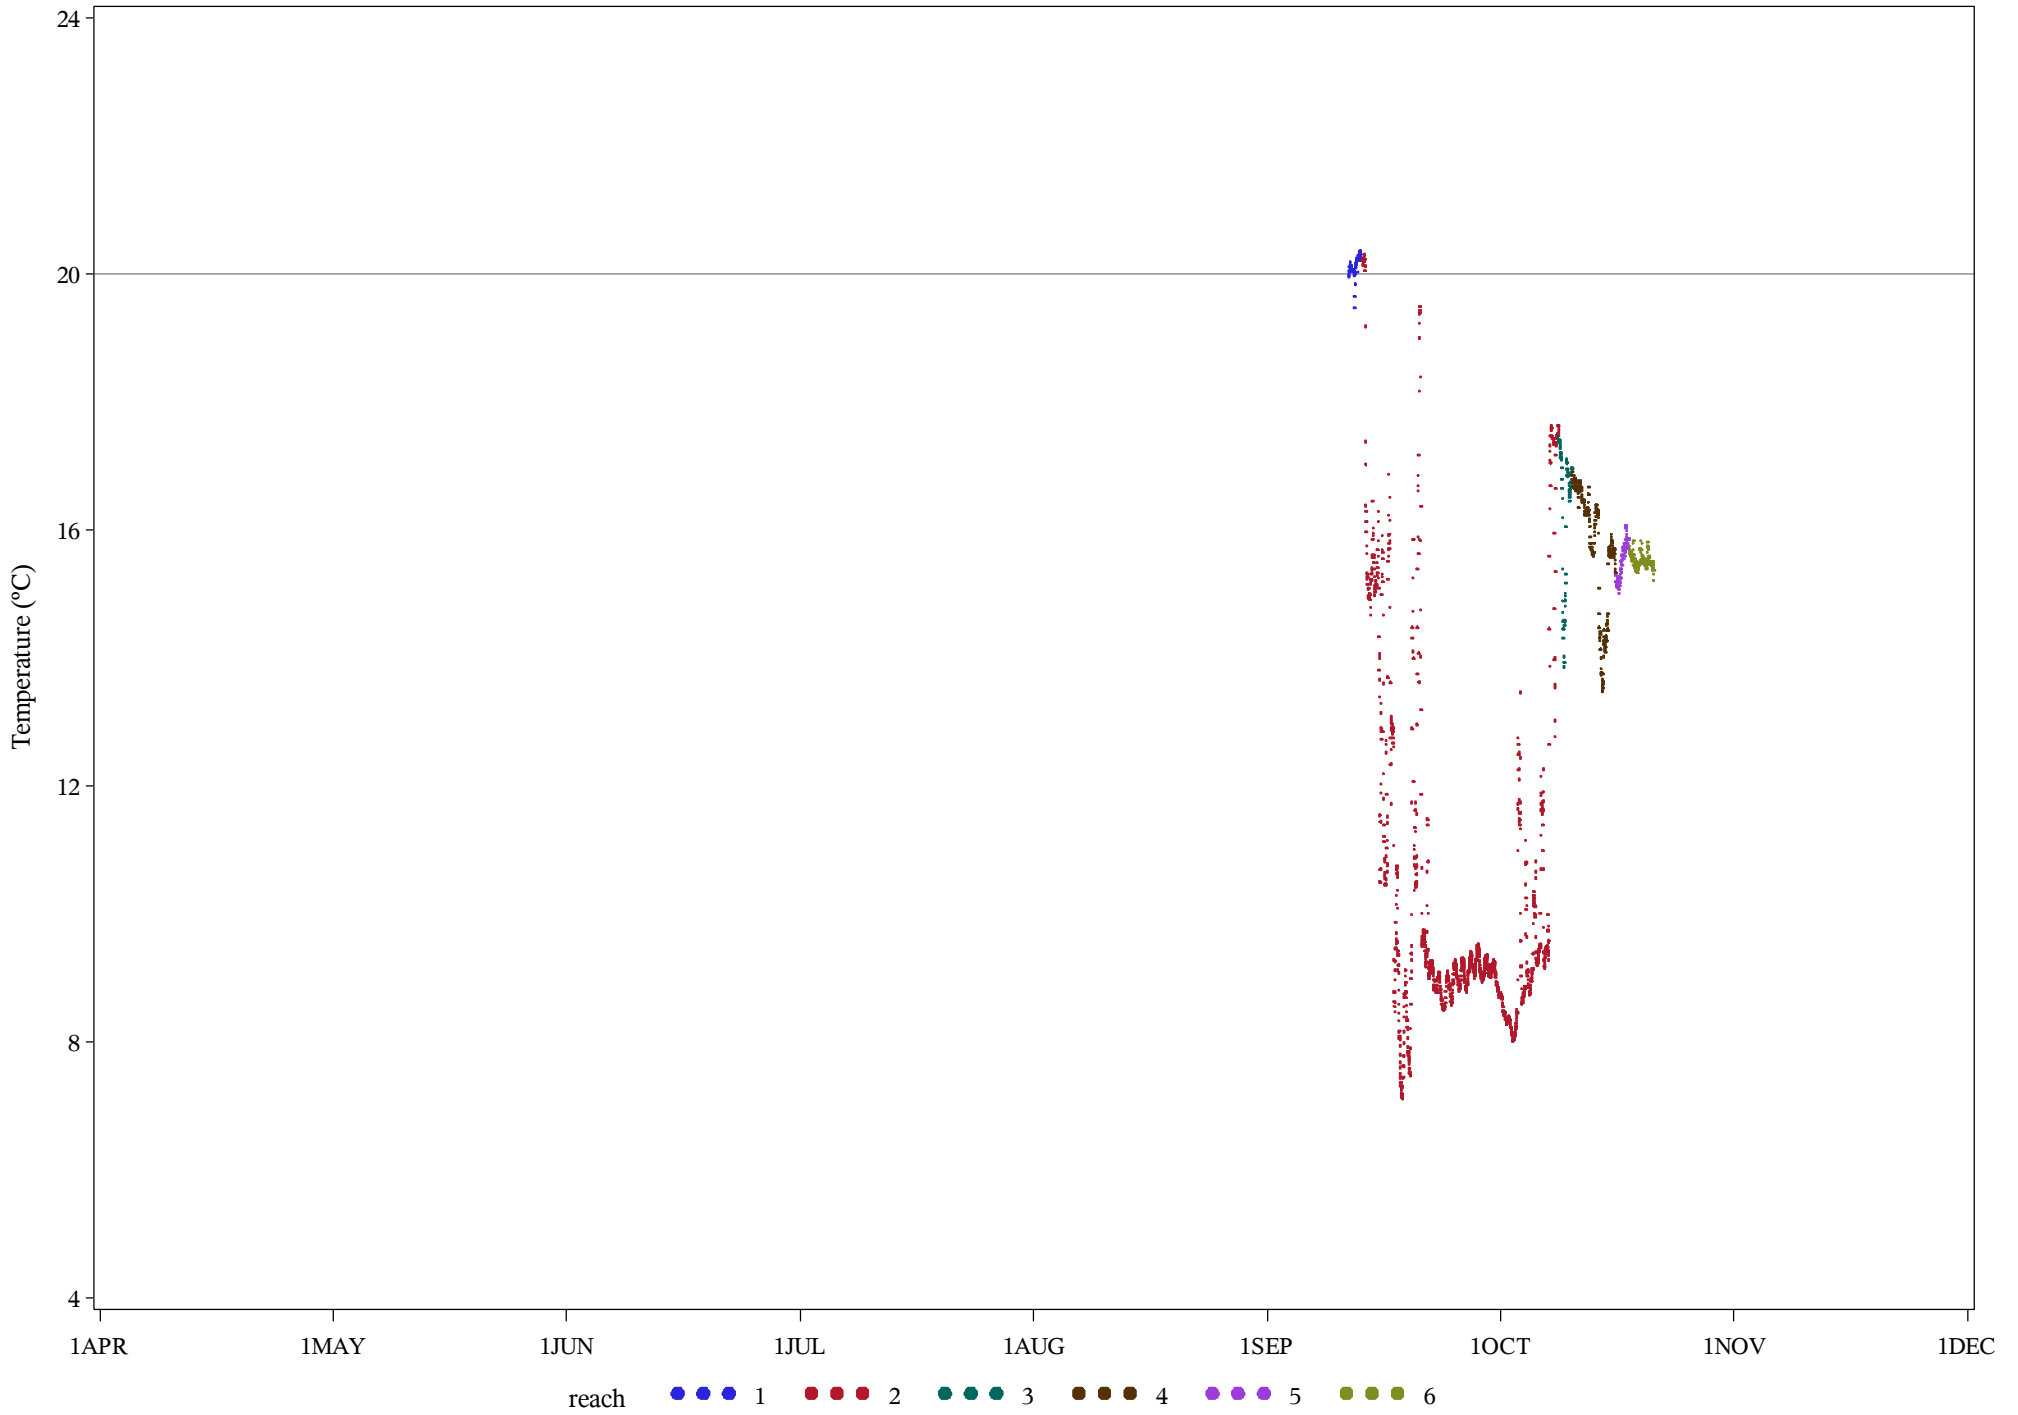



Steelhead  
4647A

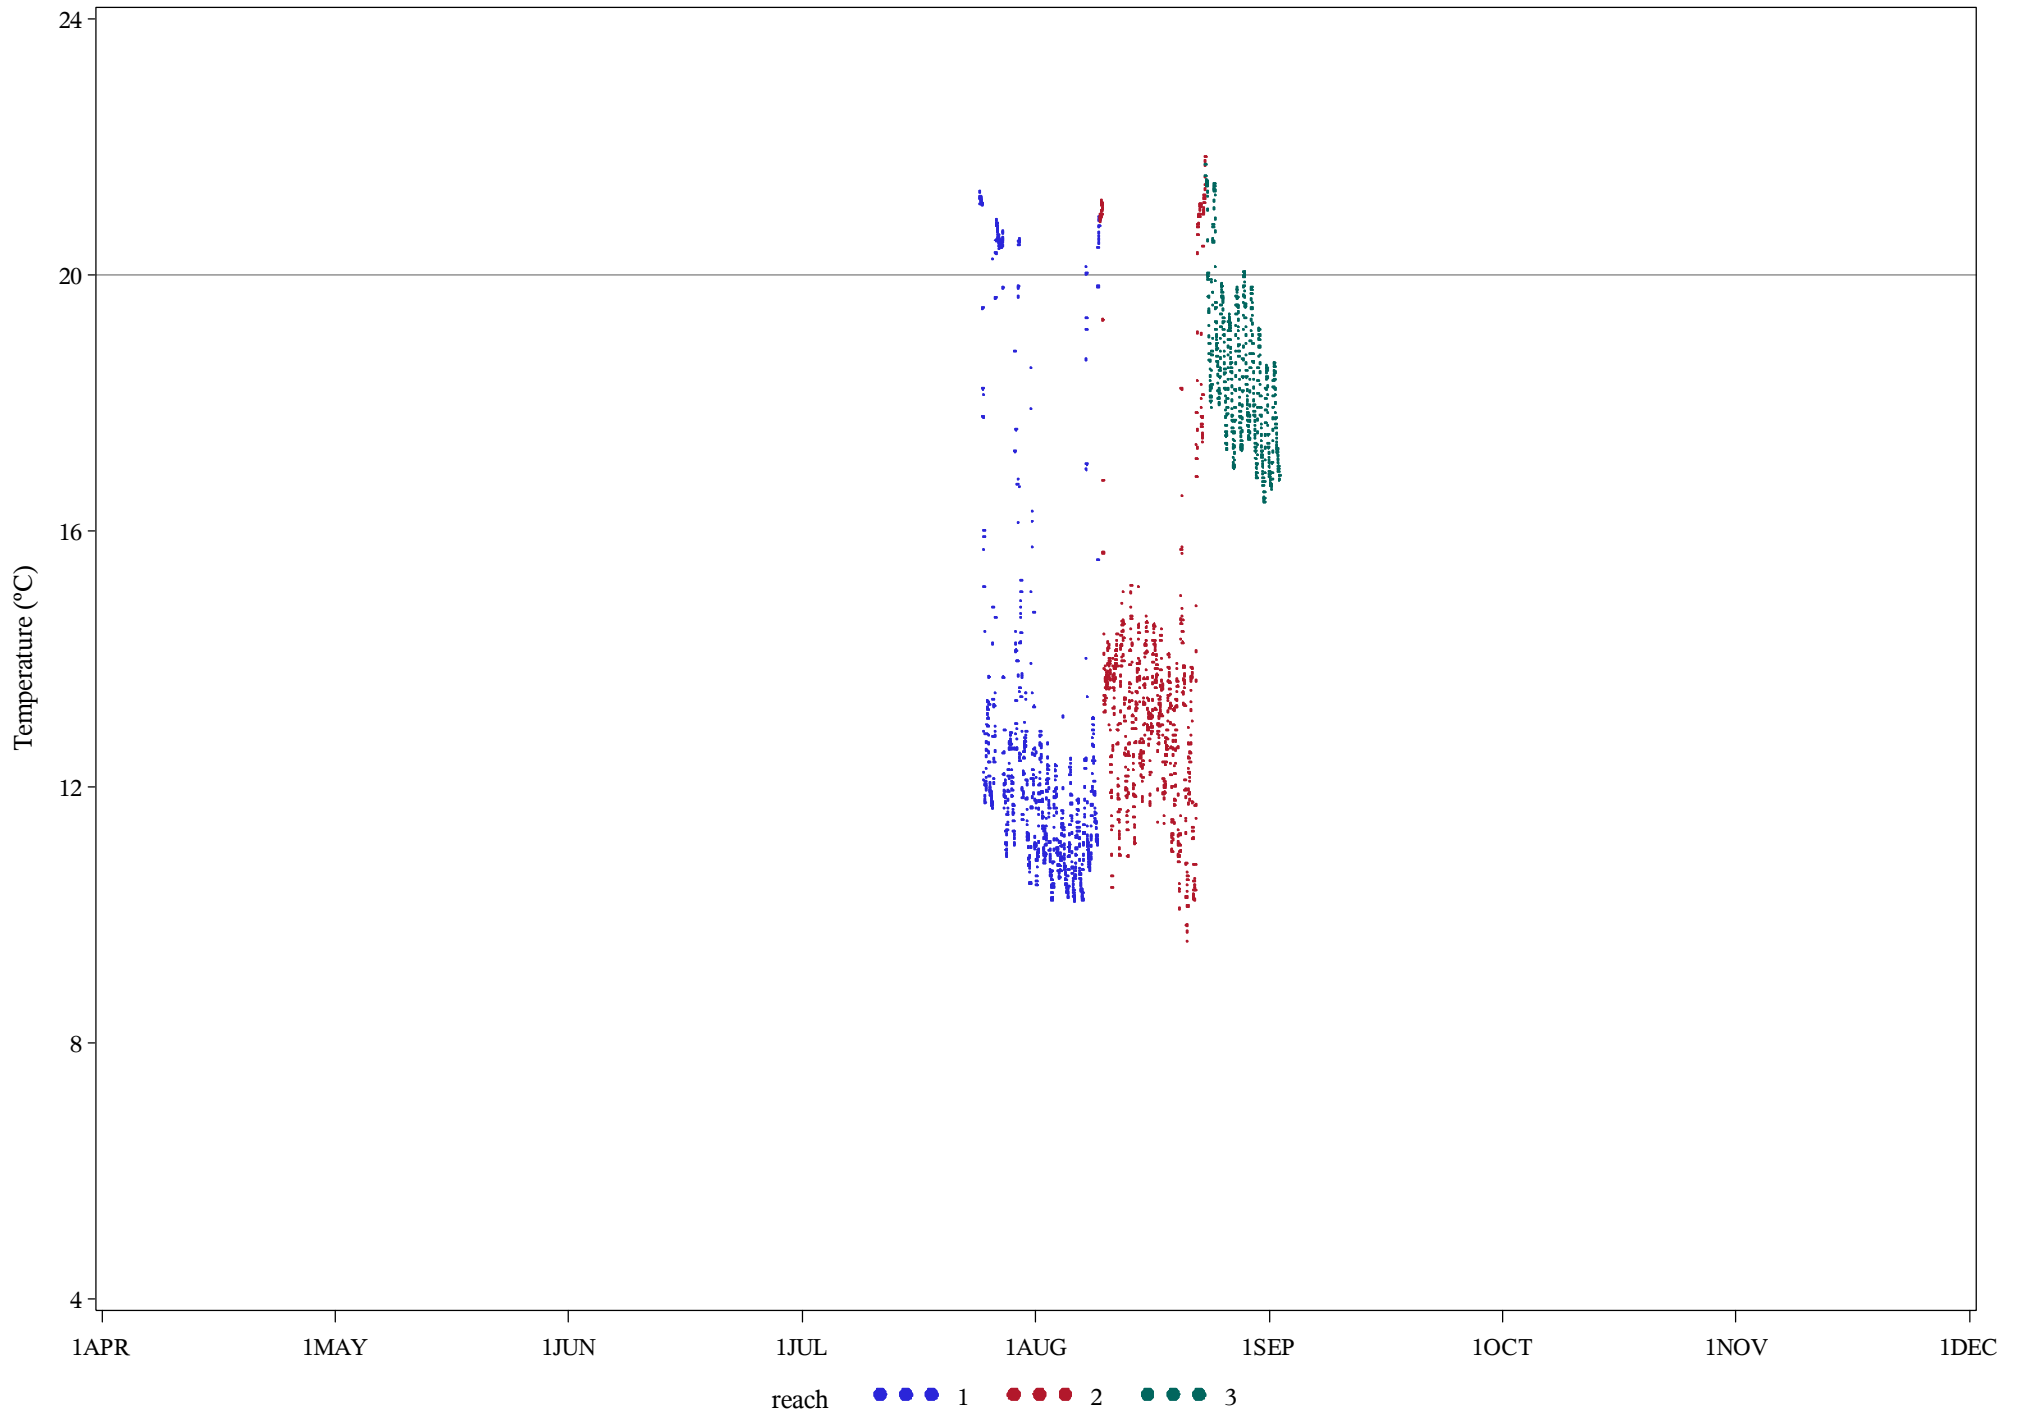

Steelhead  
4650A

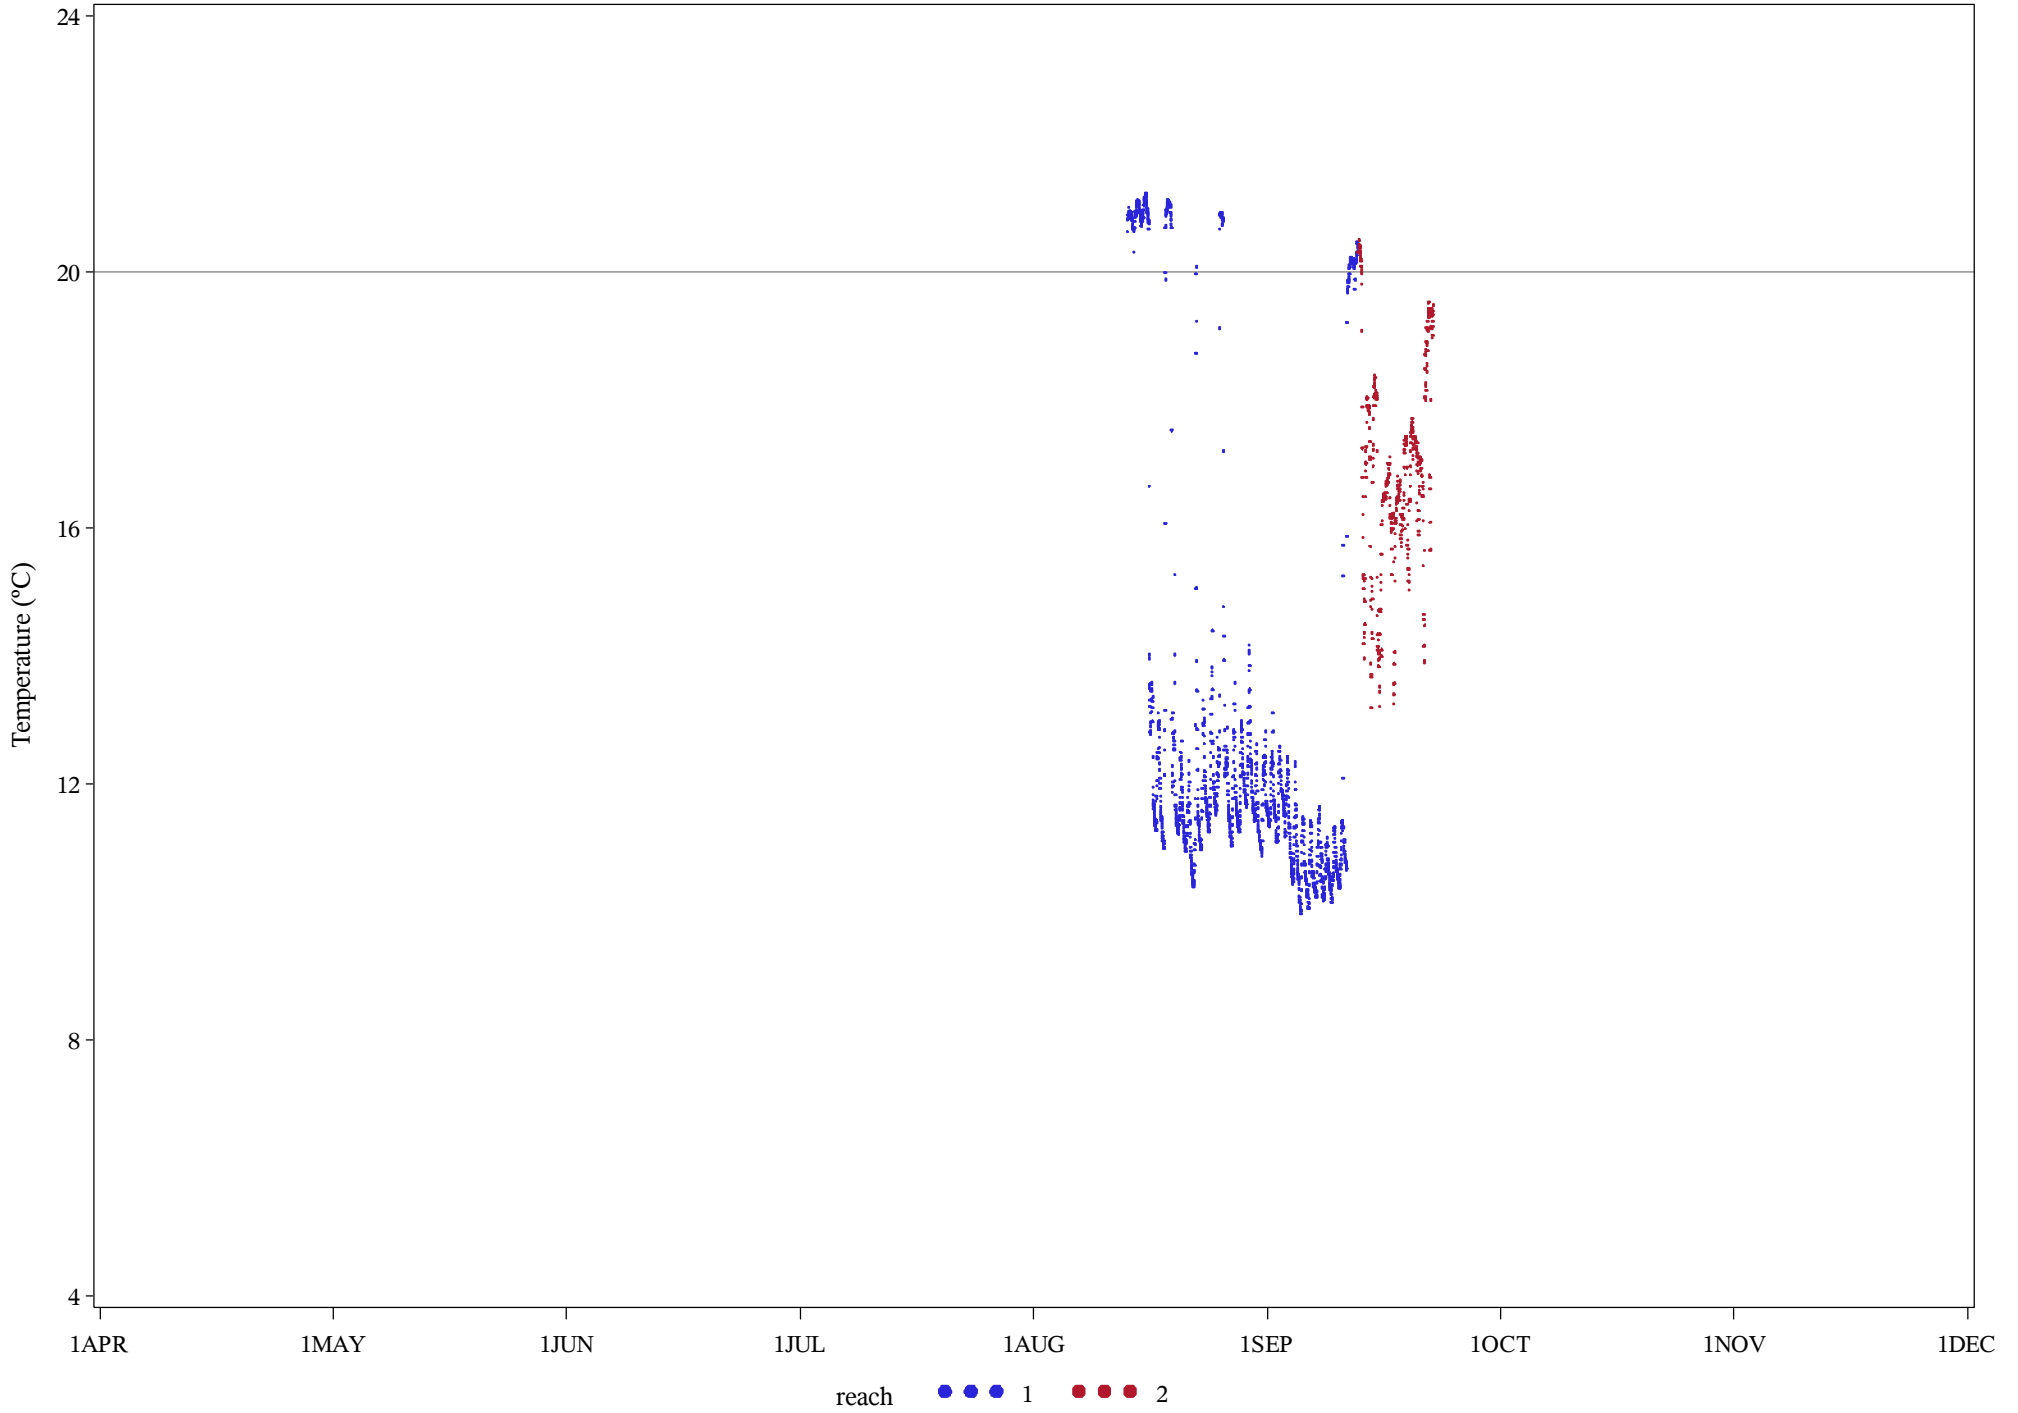

# Steelhead 4651A

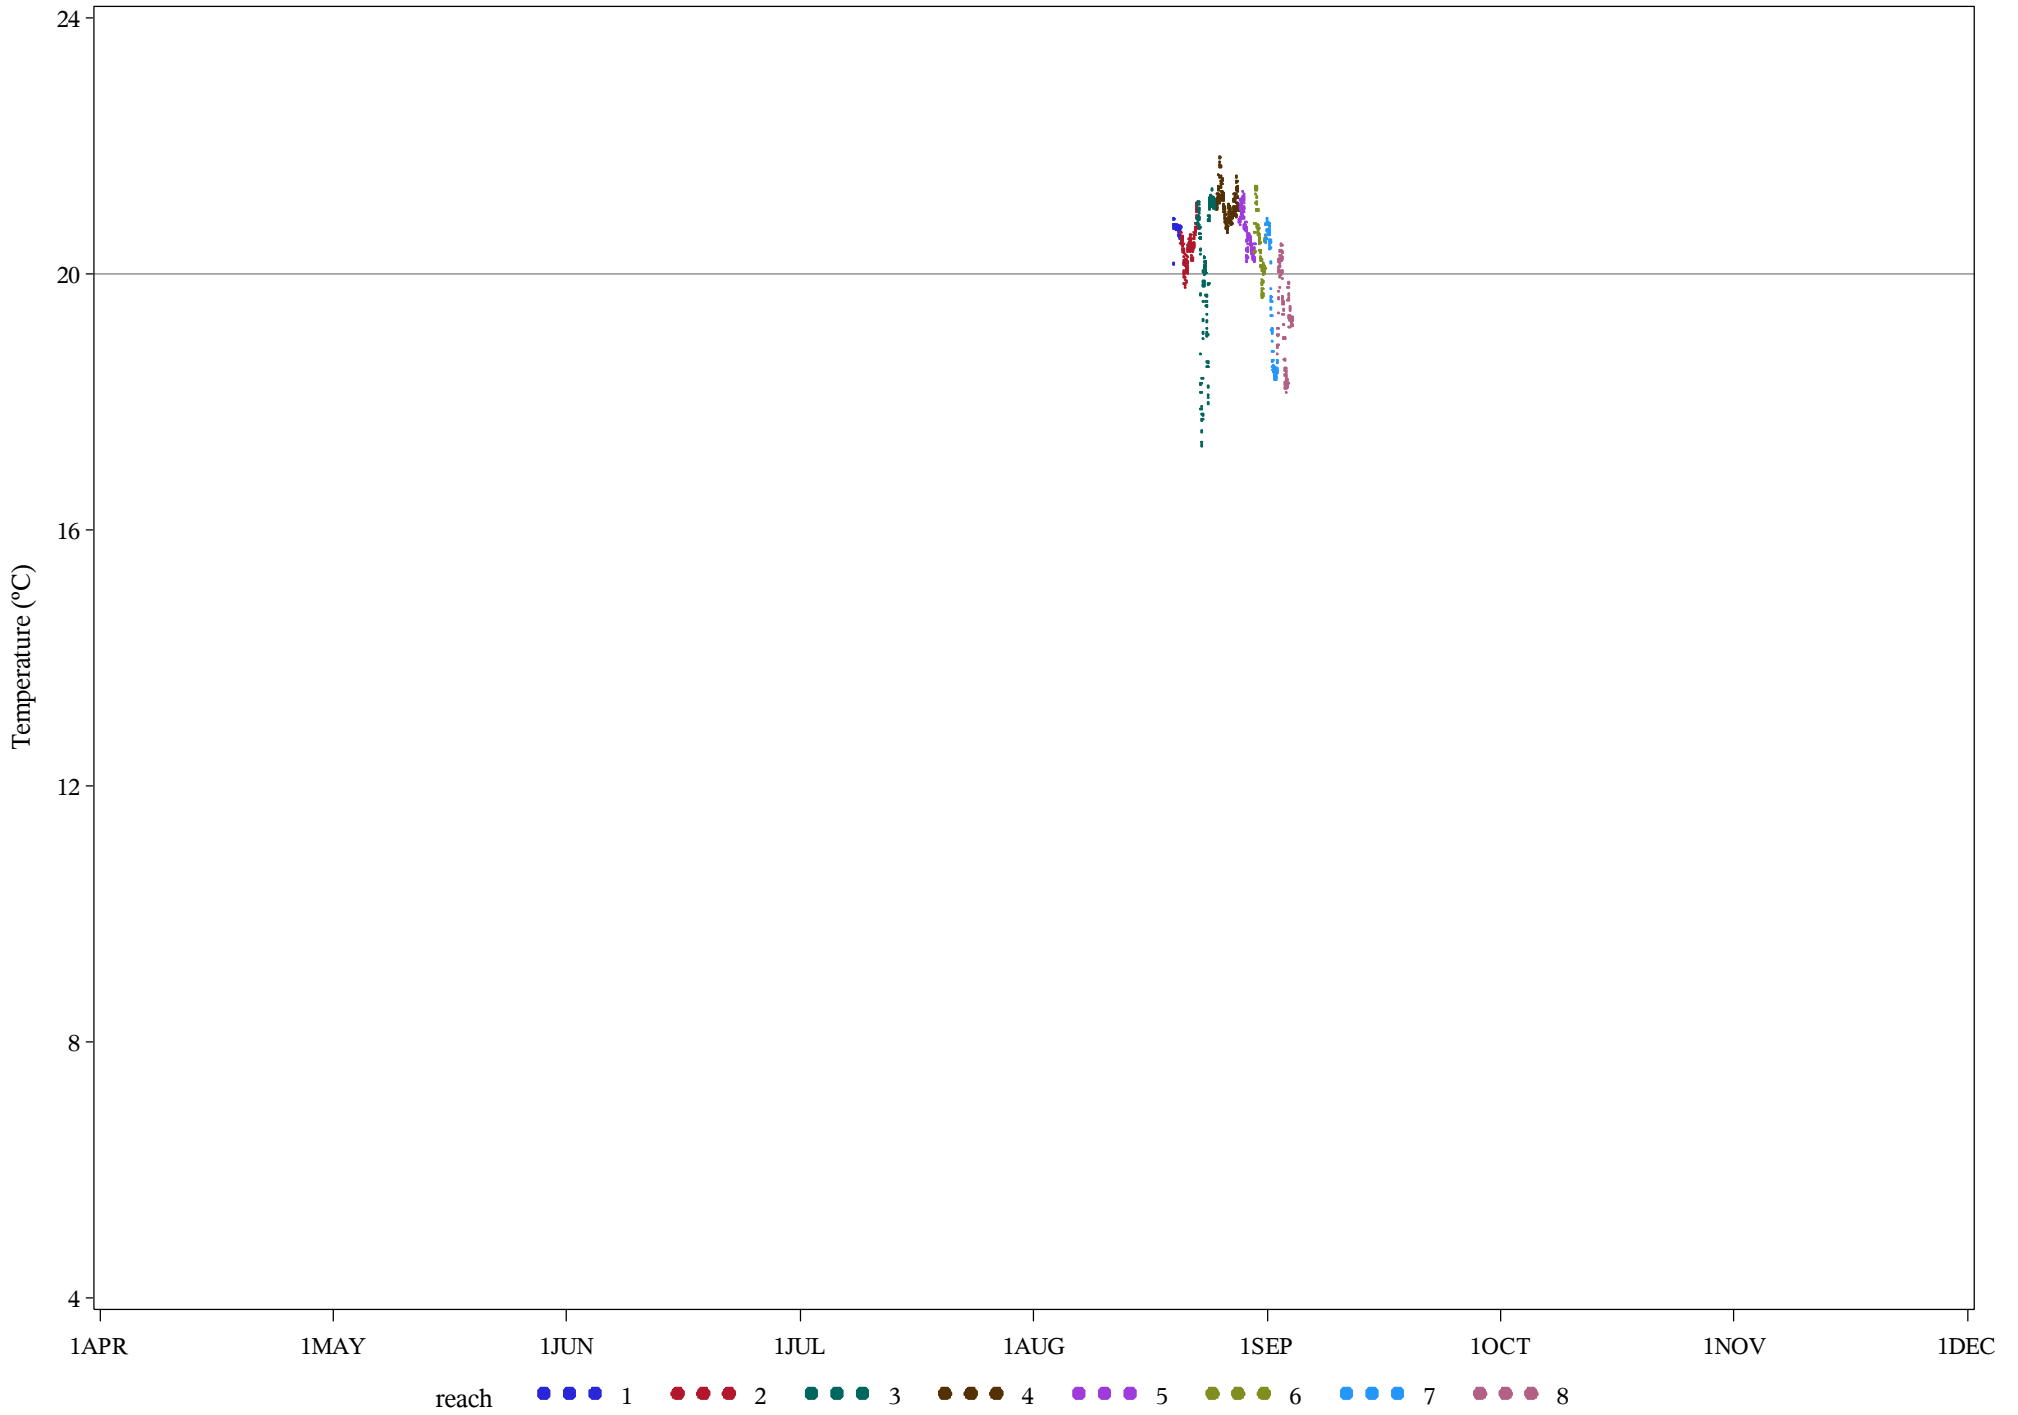

Steelhead  
4653A

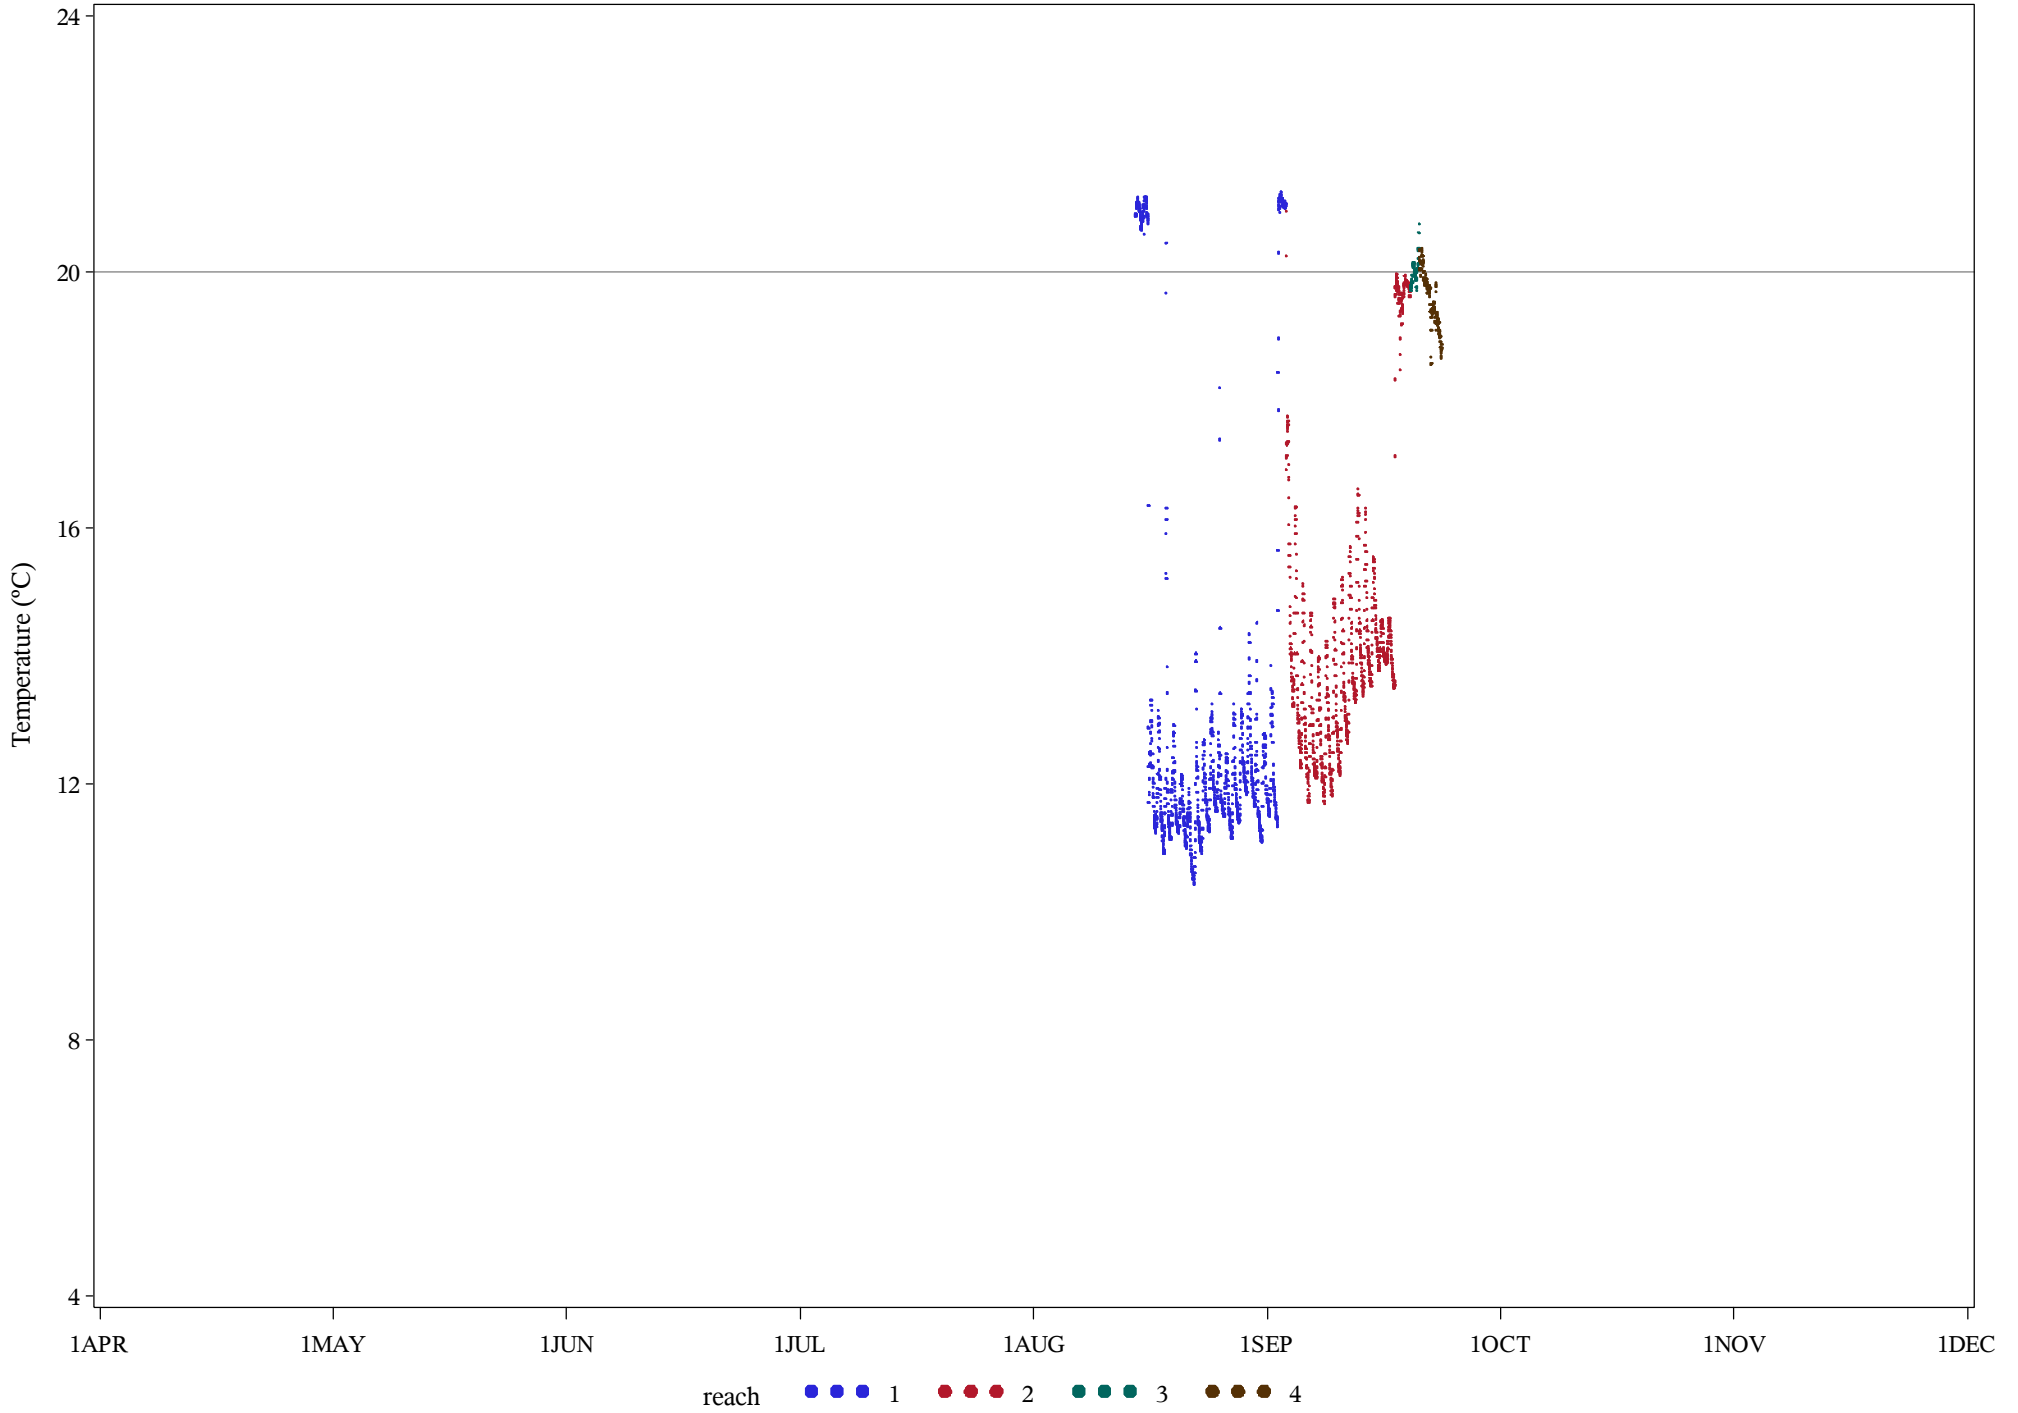



# Steelhead 4656A

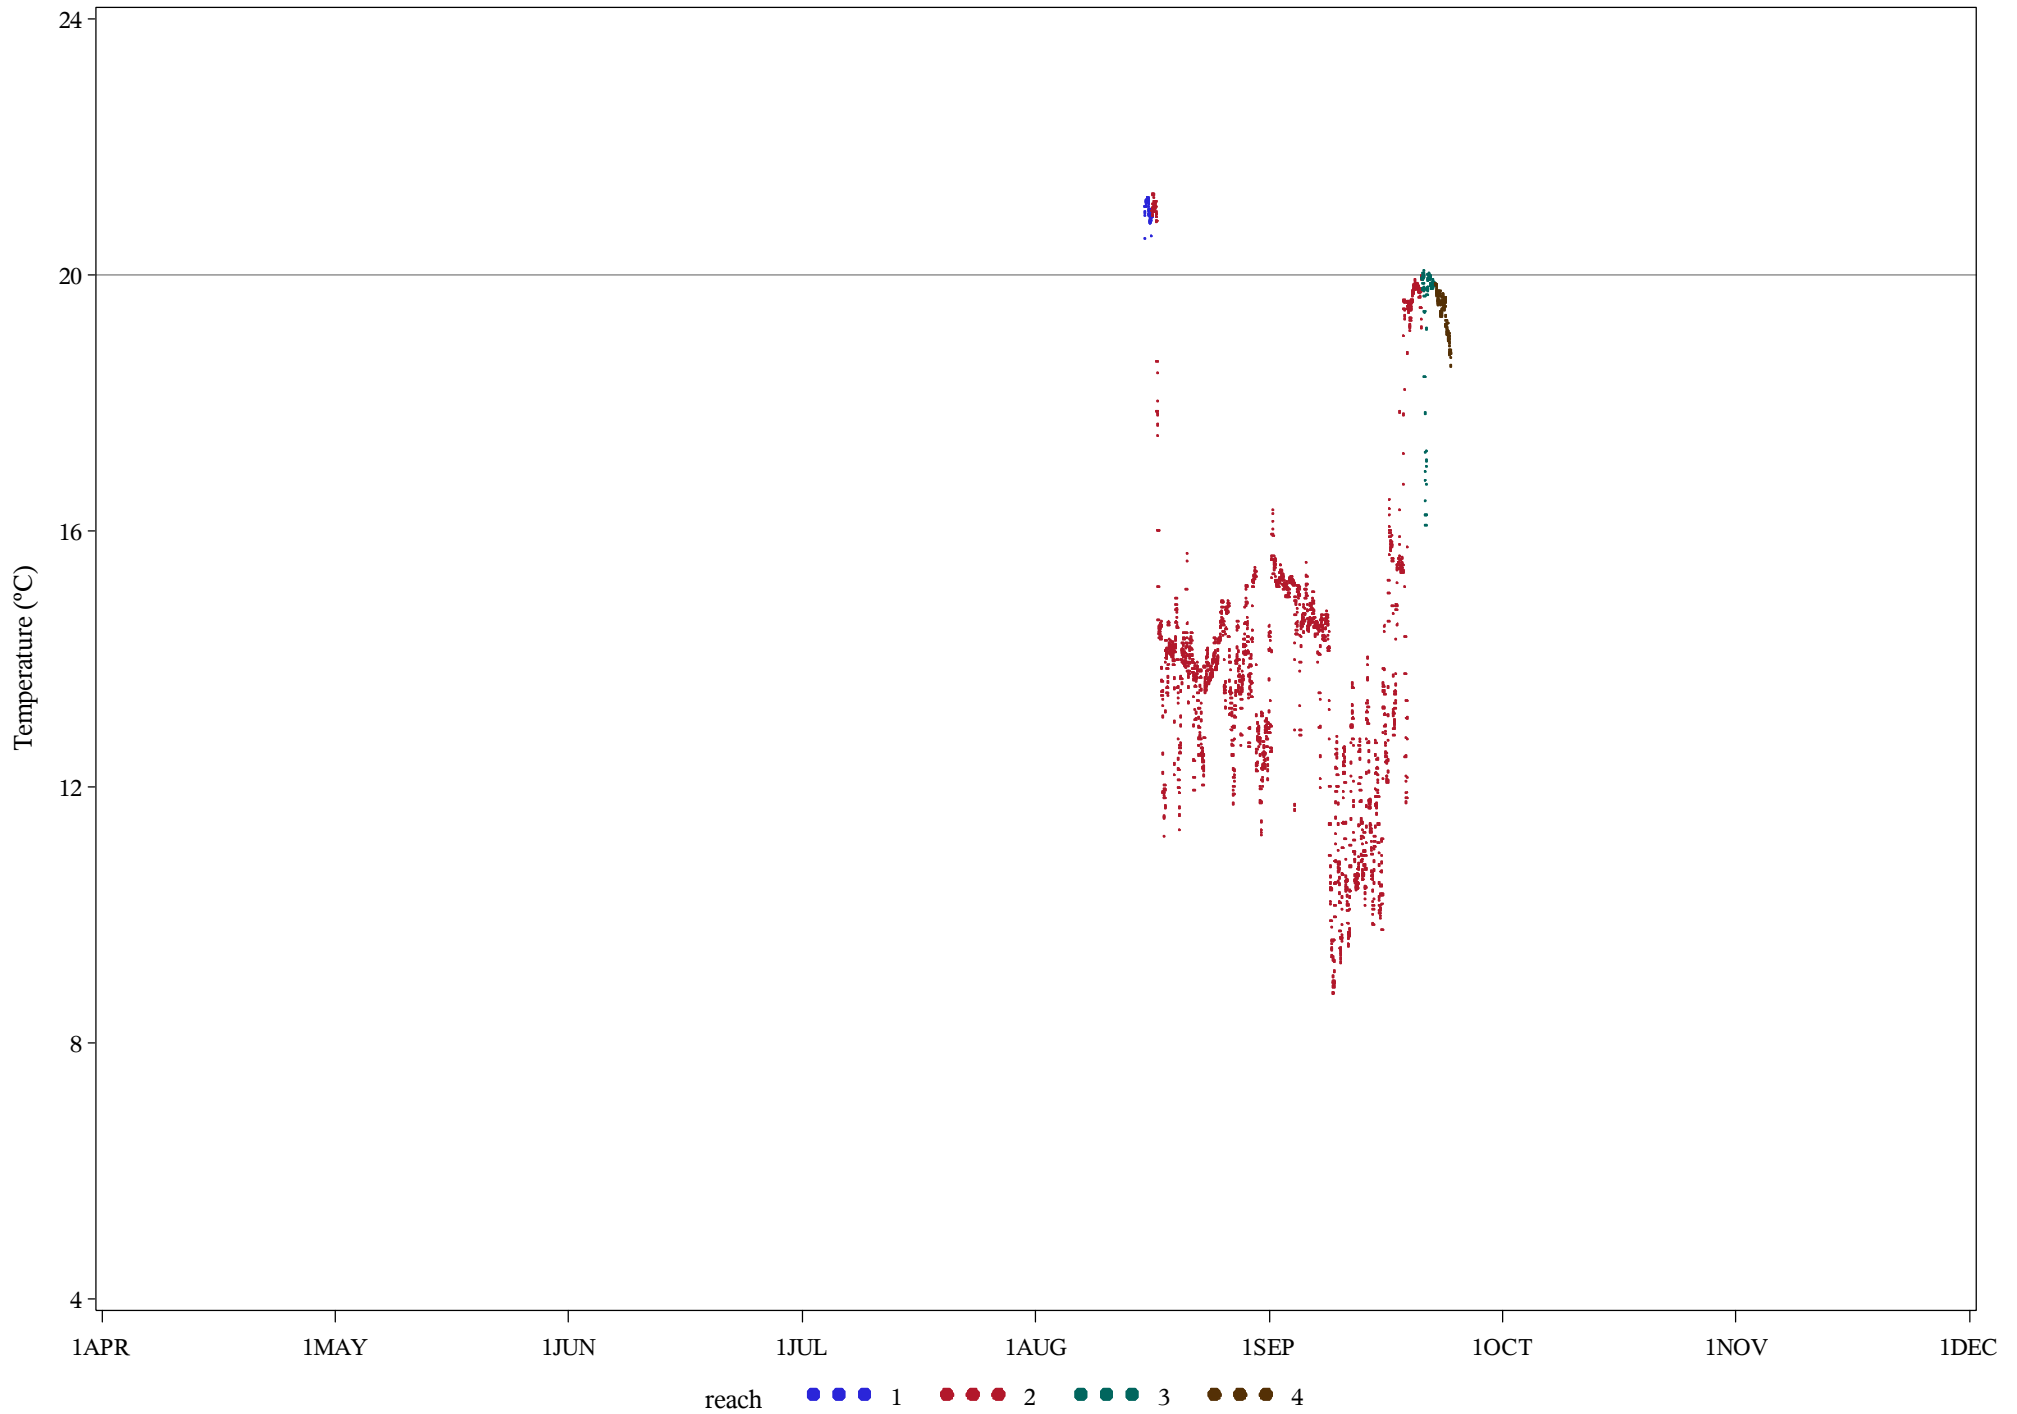



Steelhead  
4657A

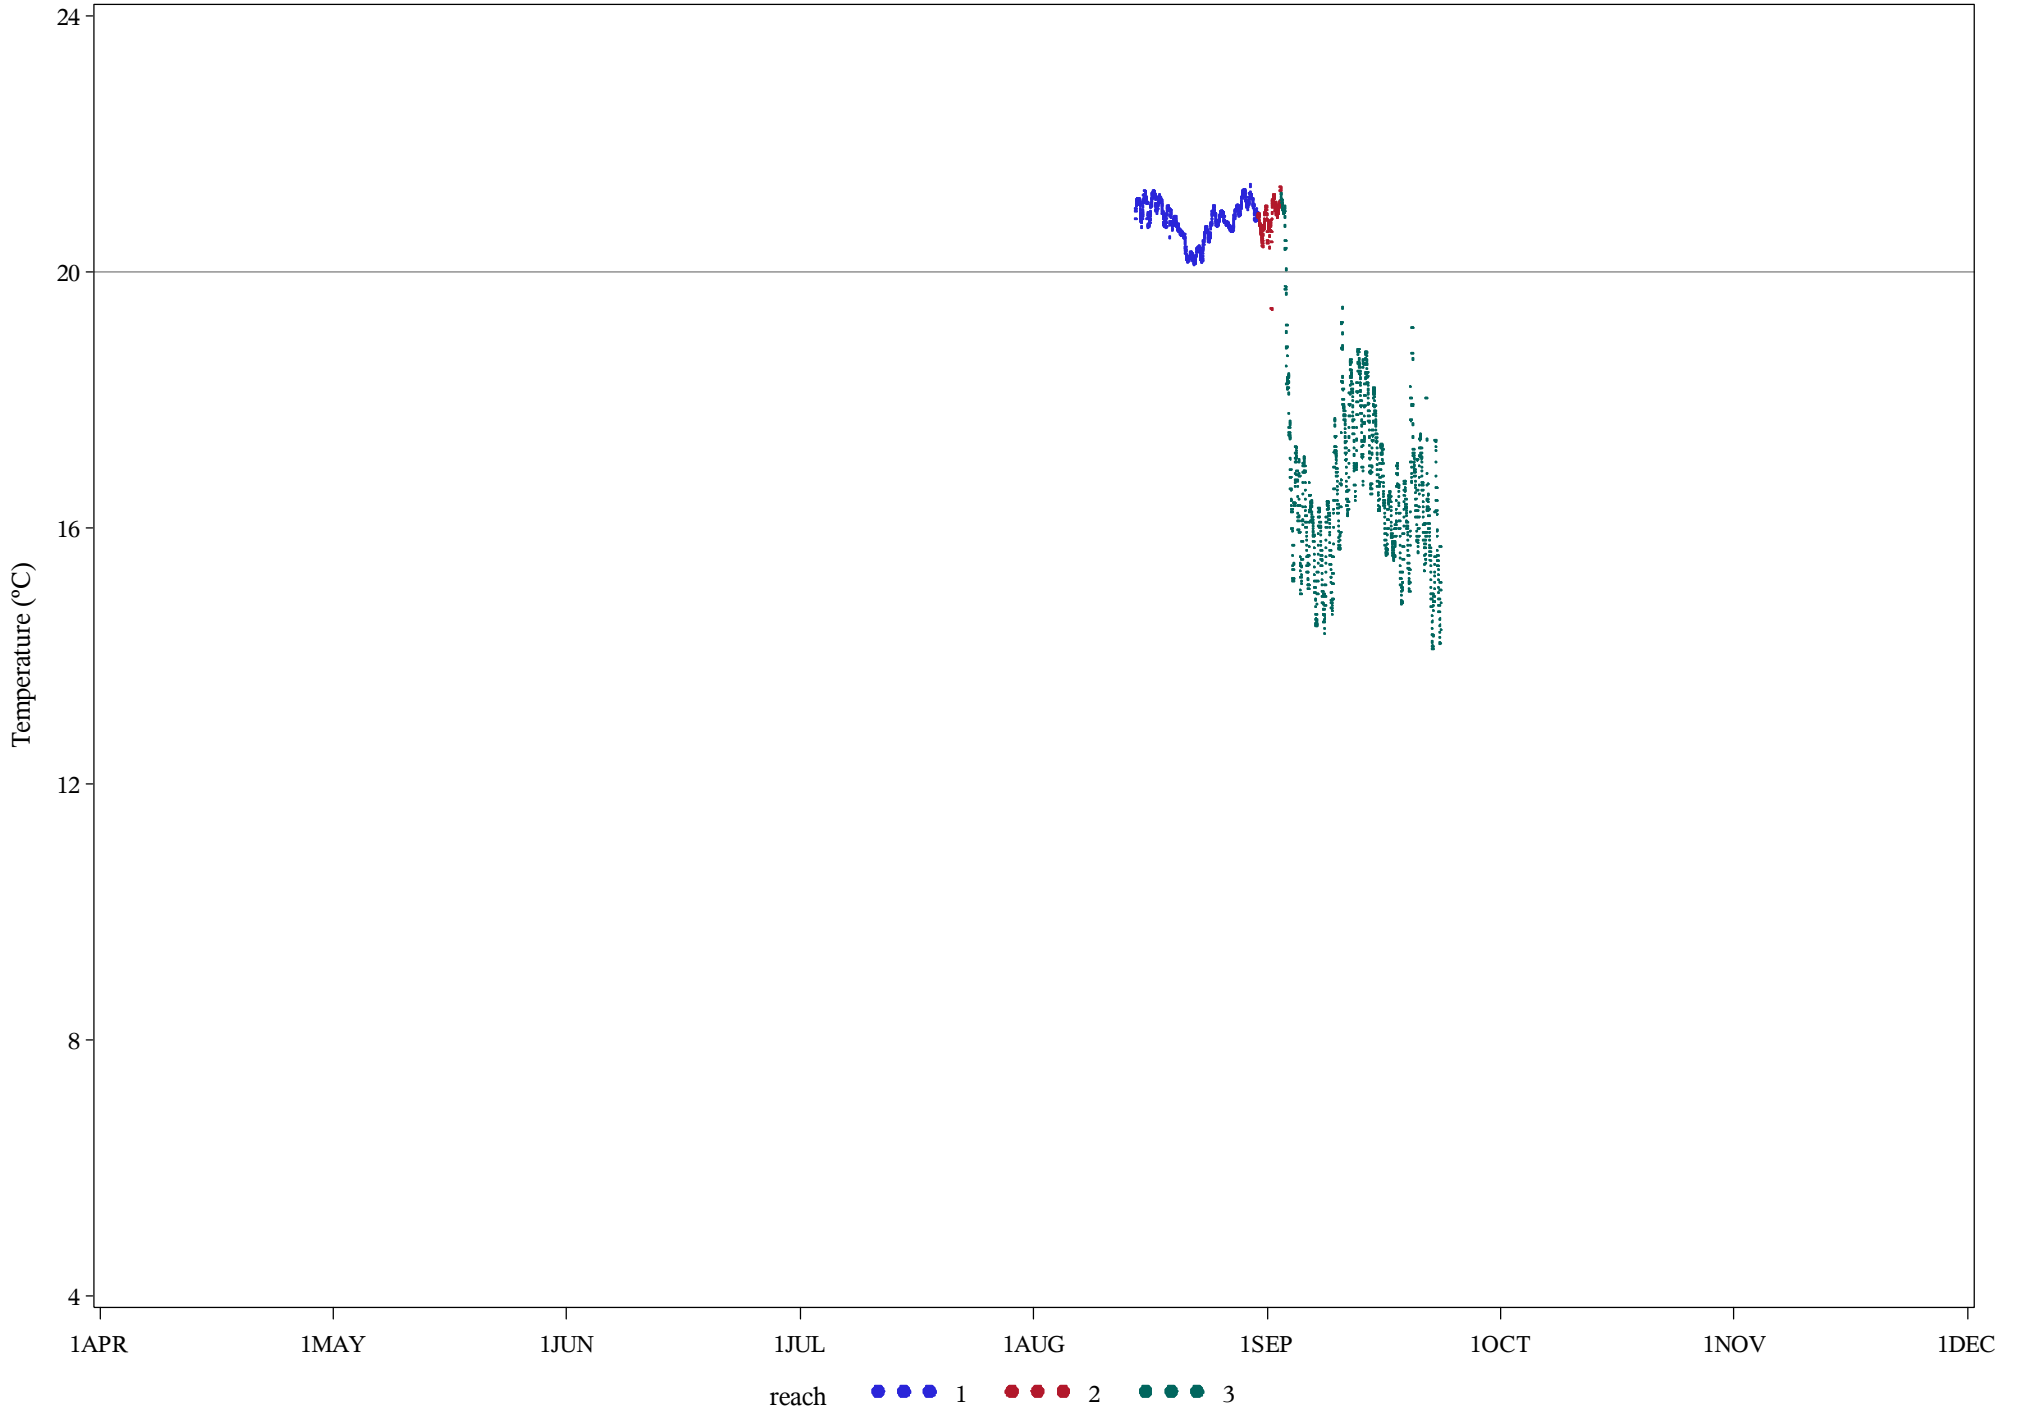

Steelhead  
4658A

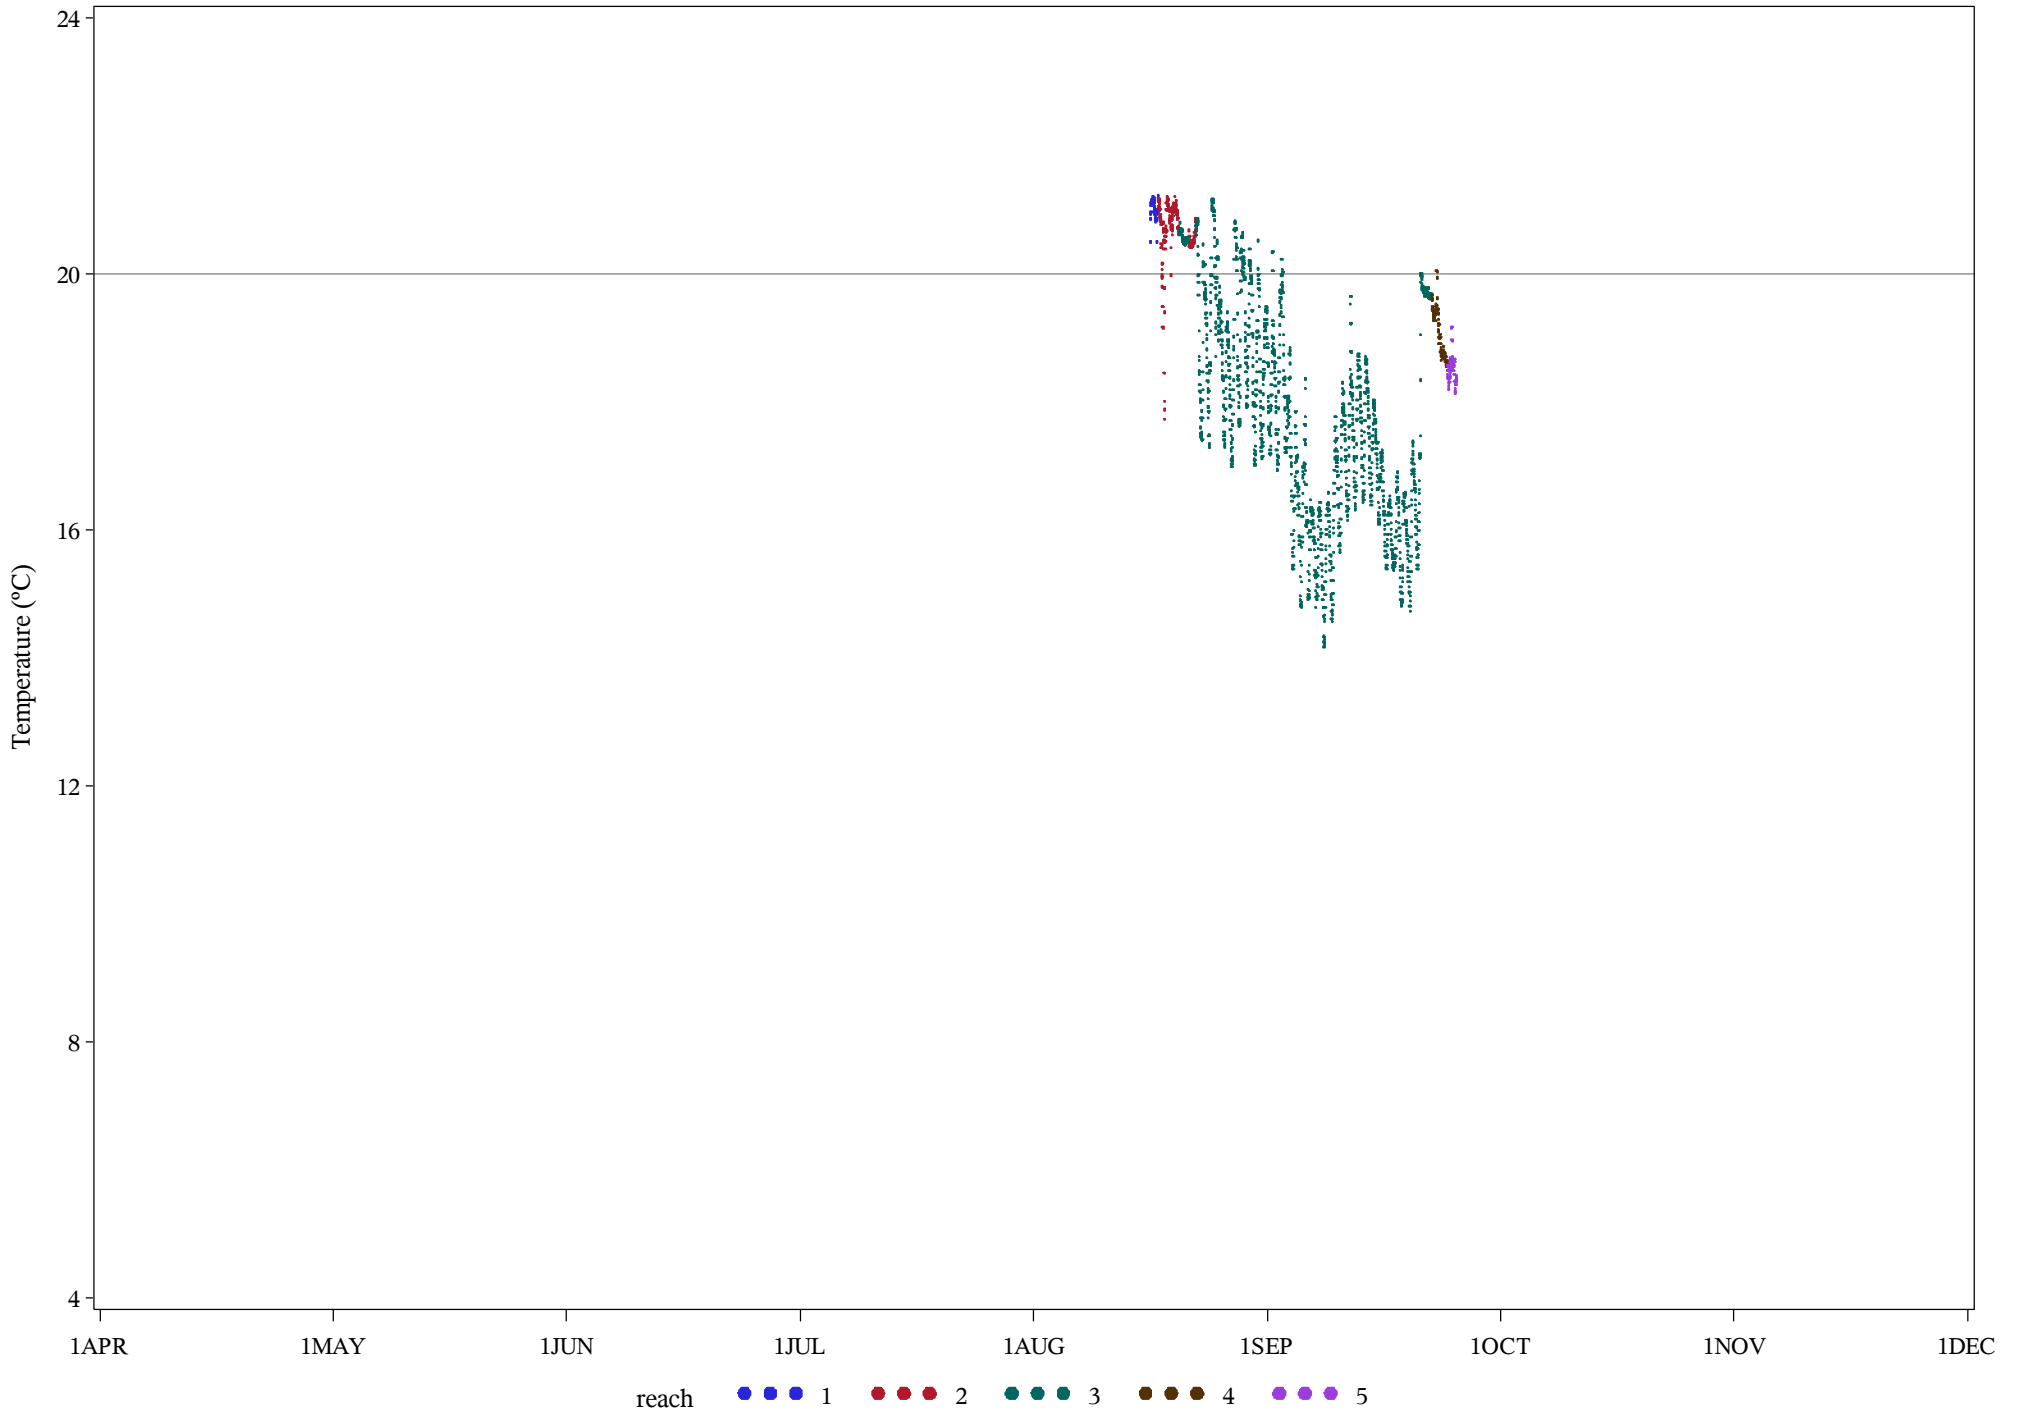

# Steelhead 4659A

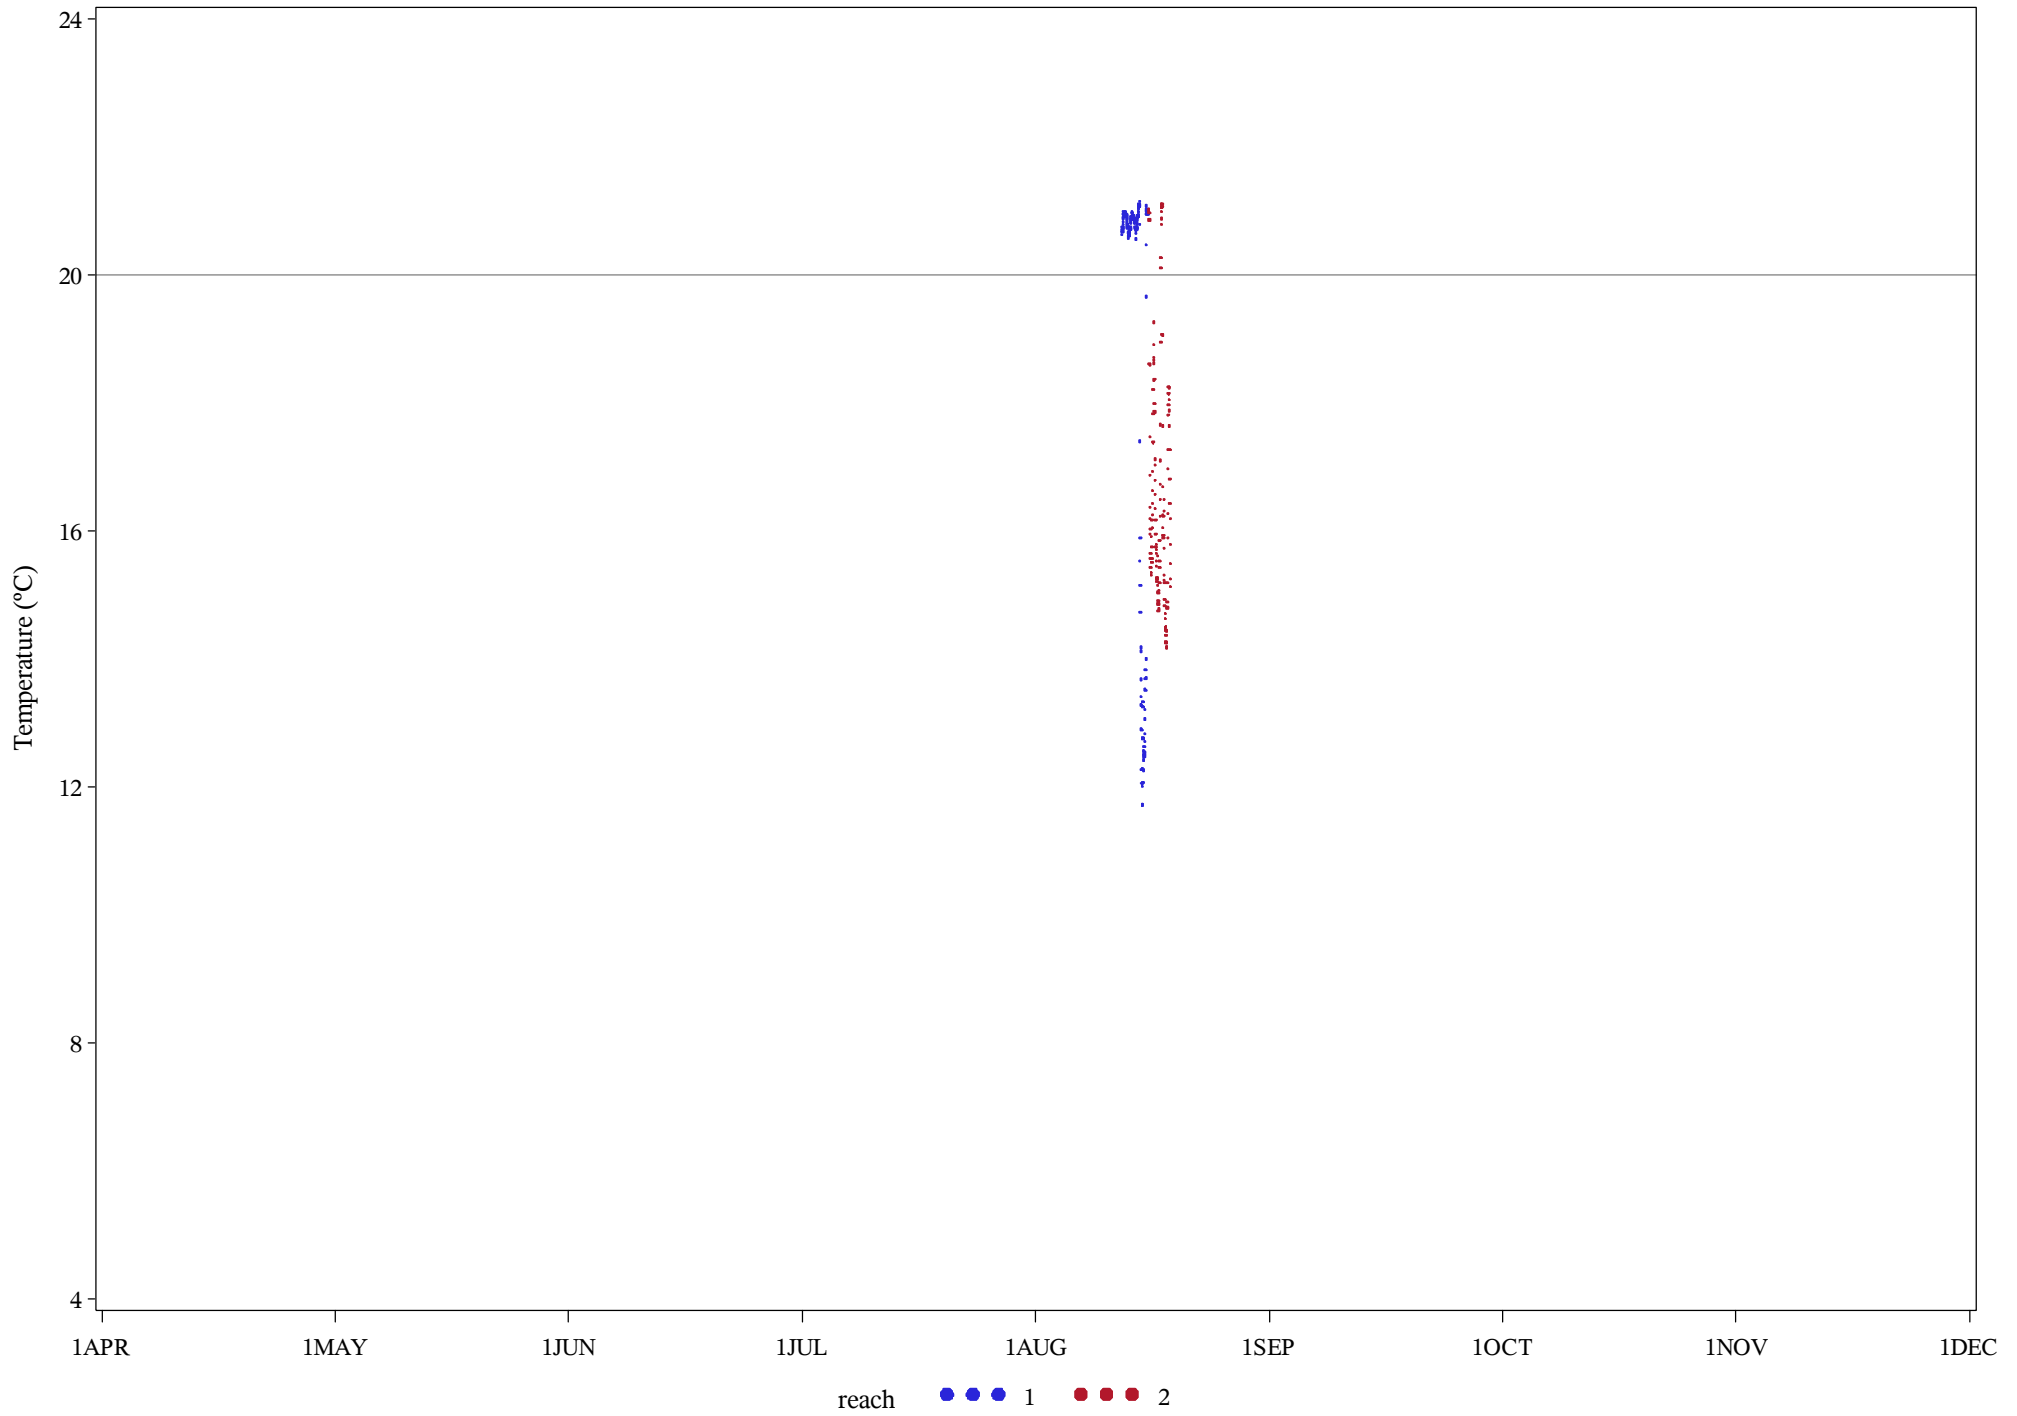

# Steelhead 4659B

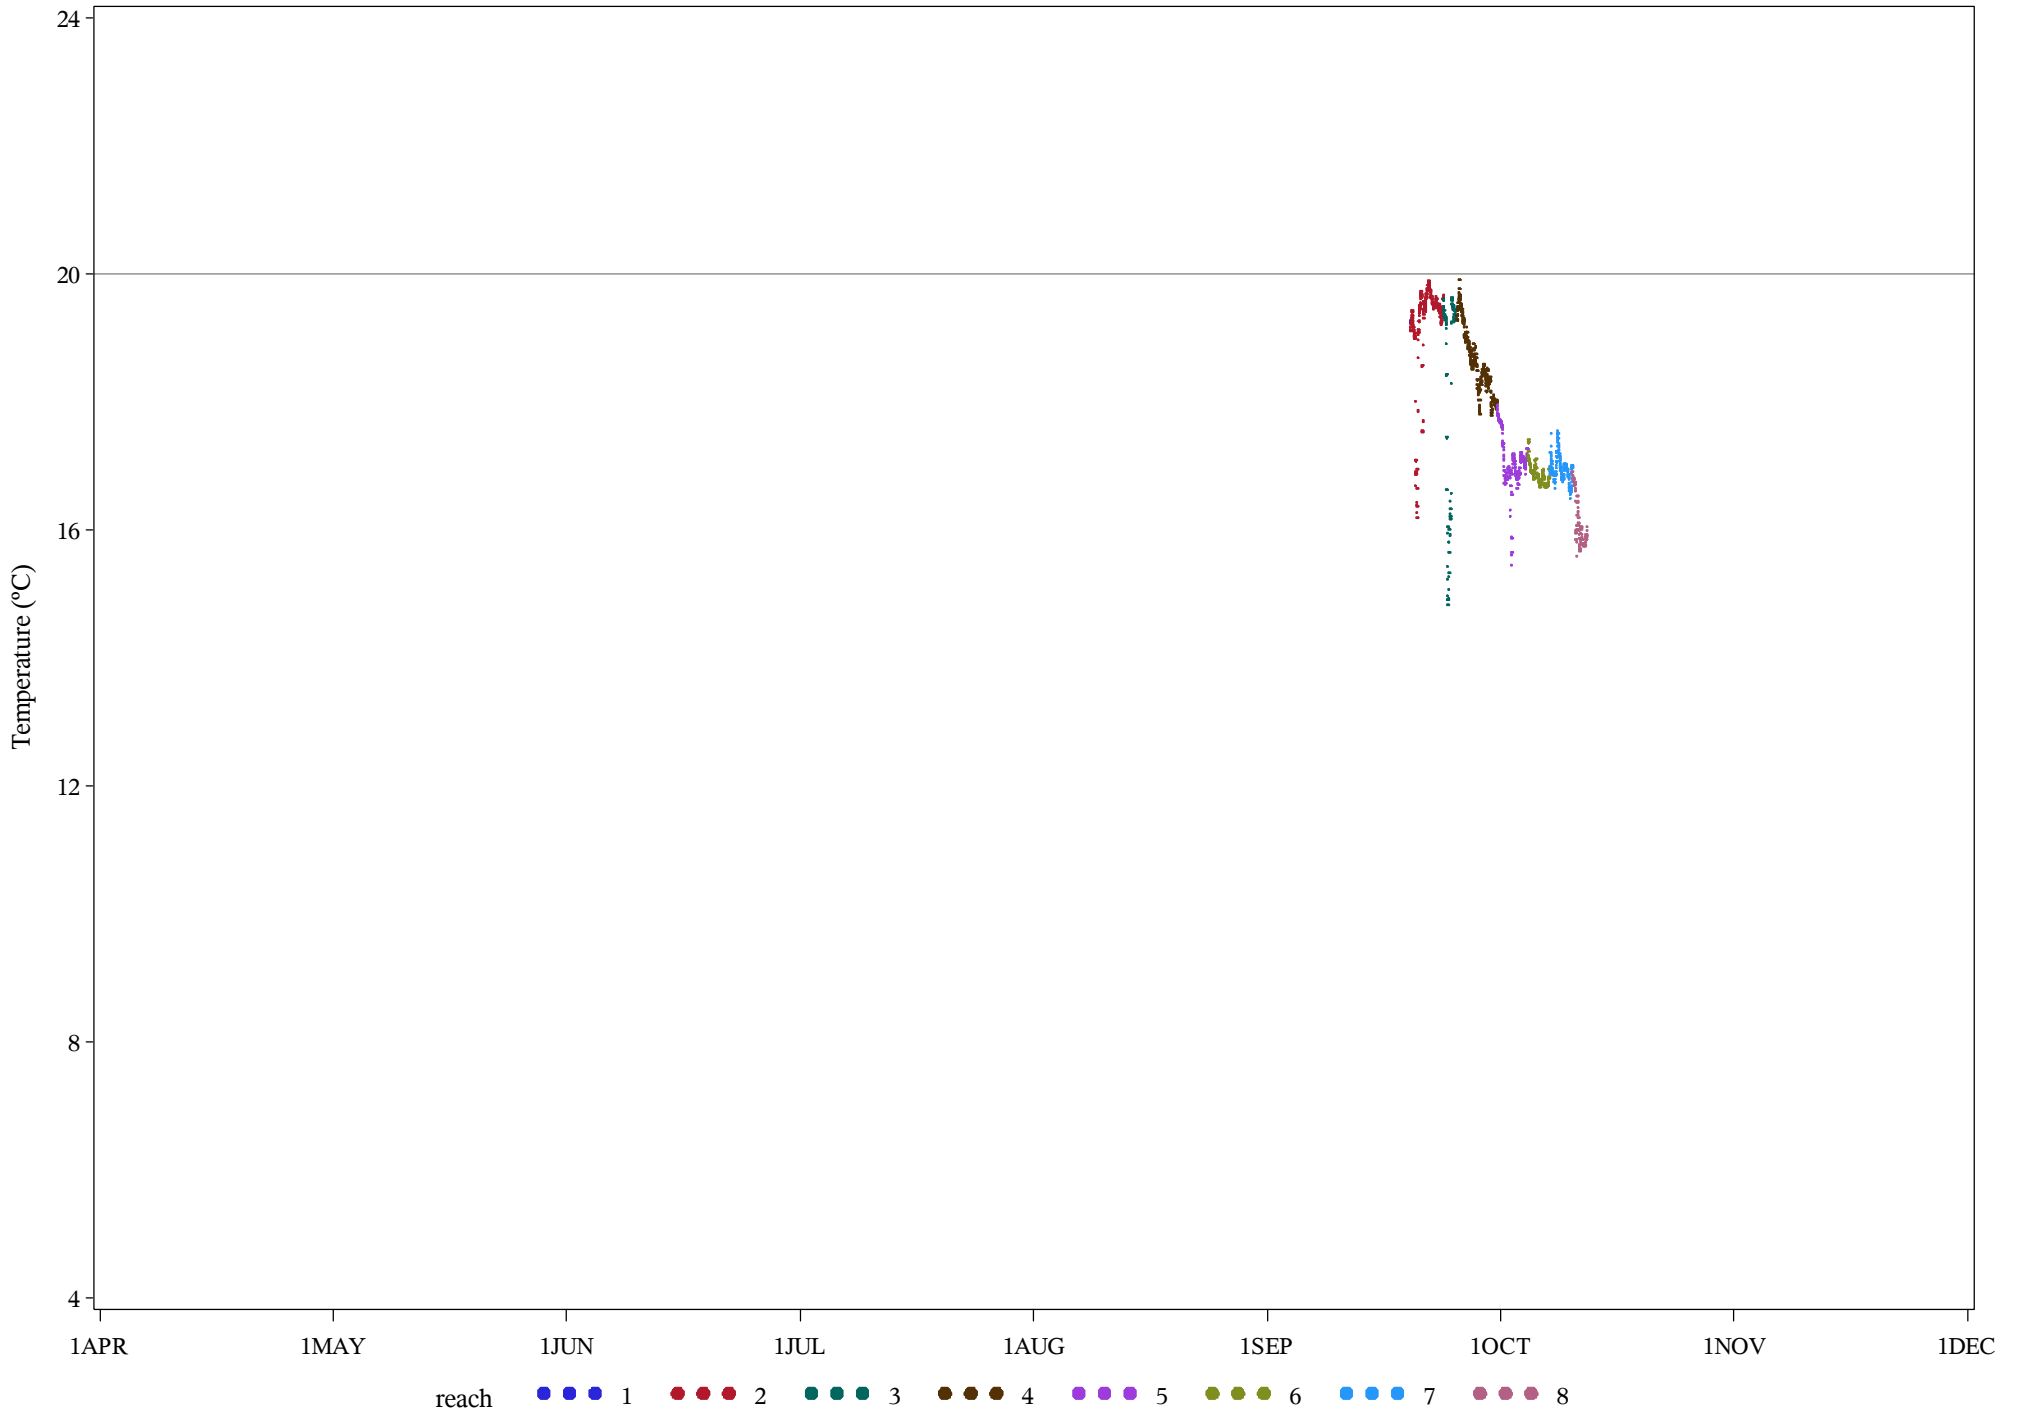

# Steelhead 4660A

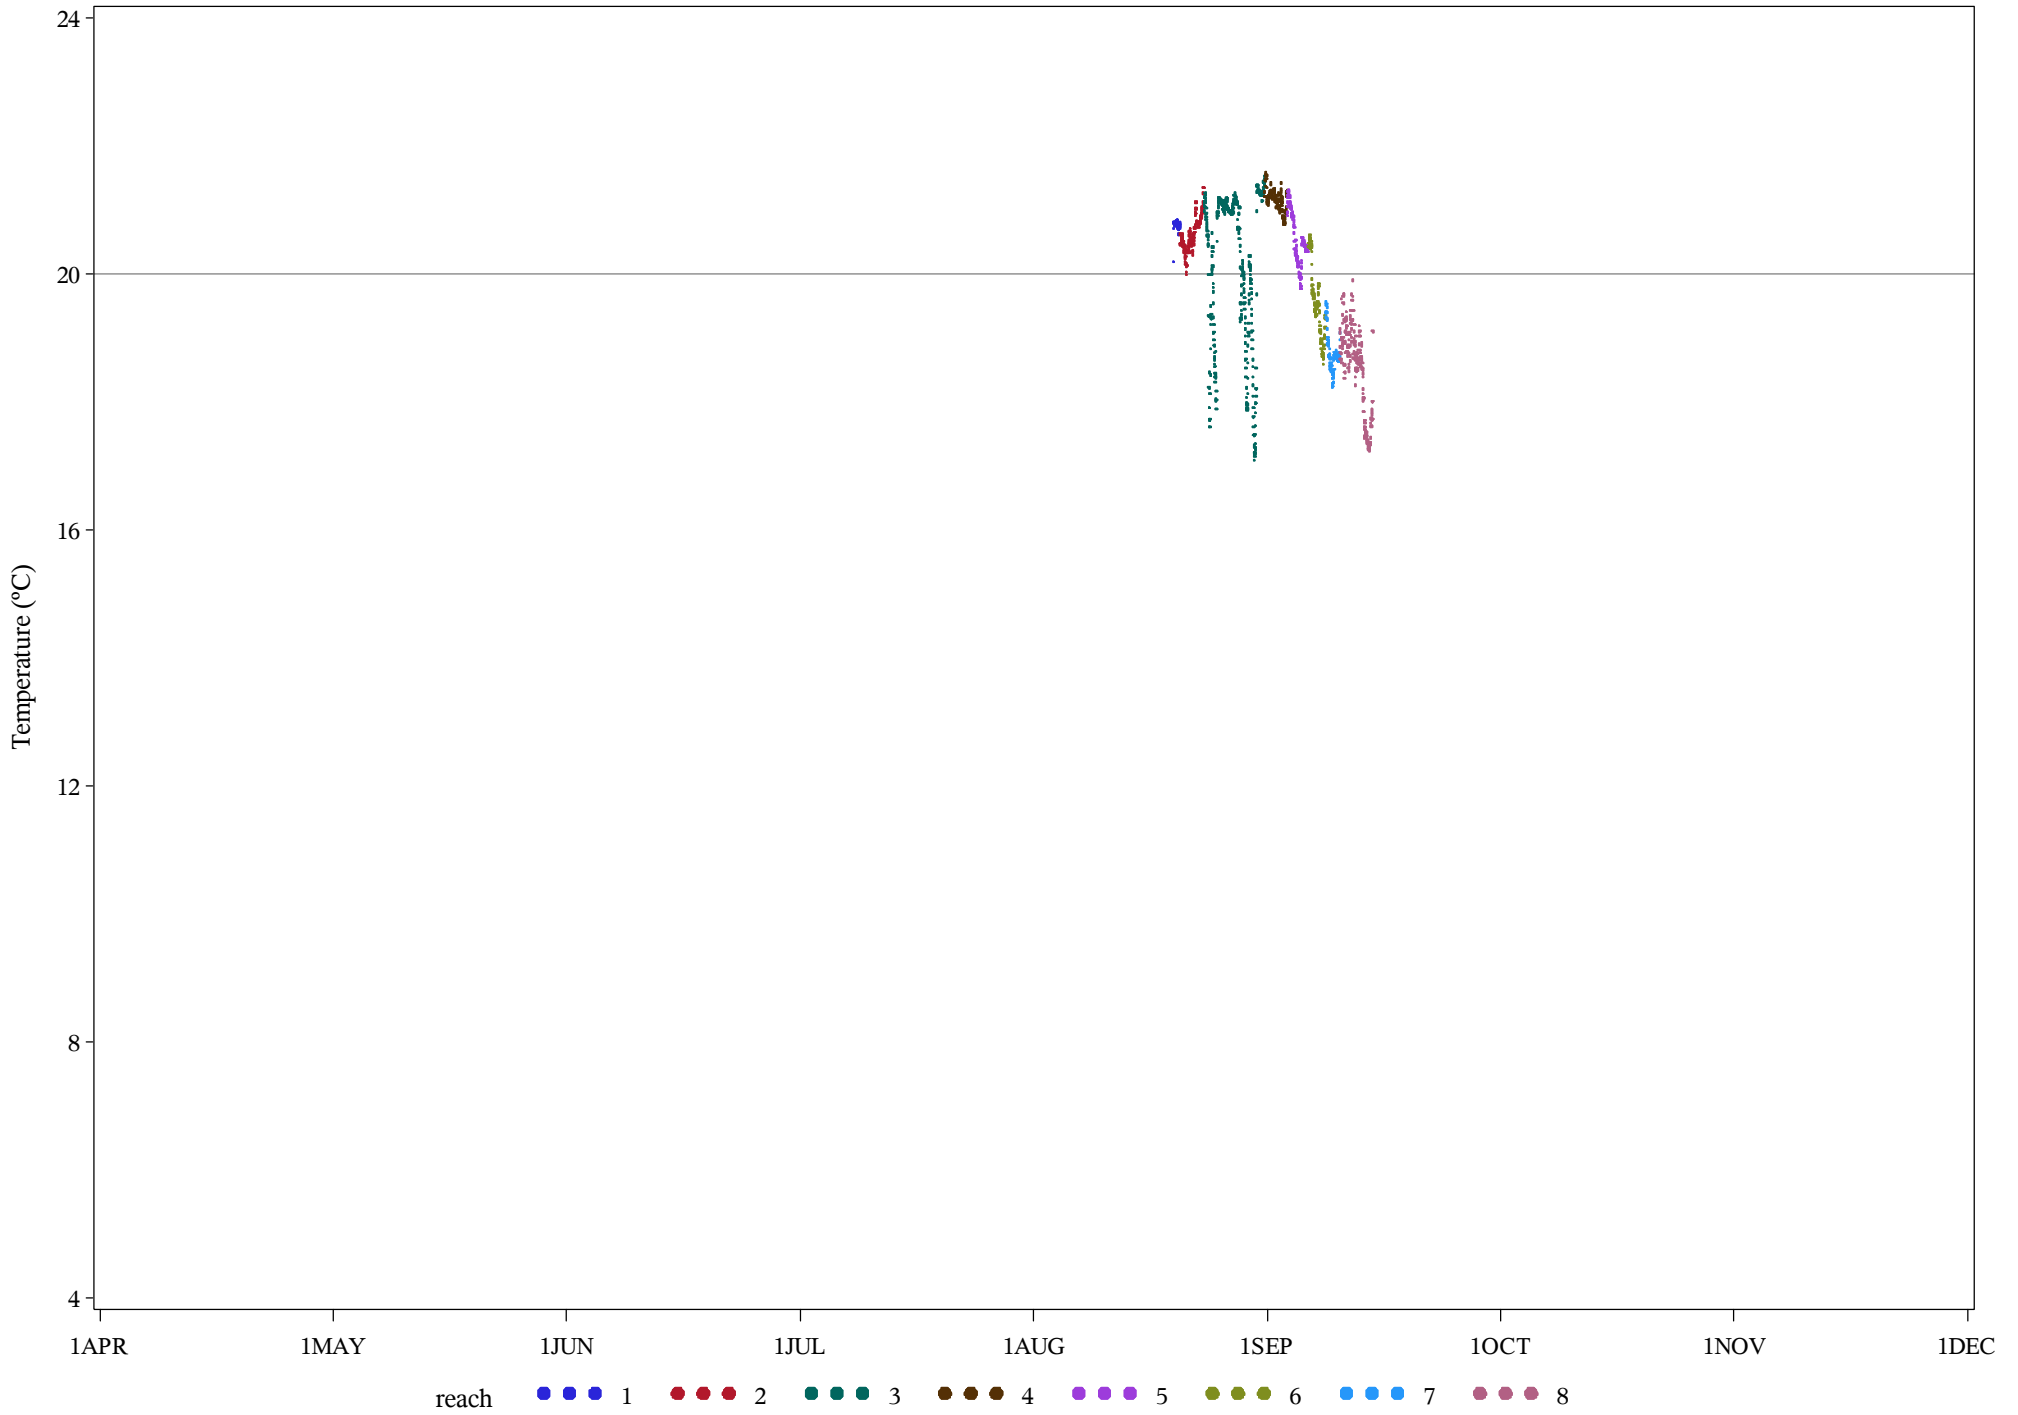

Steelhead  
4661A

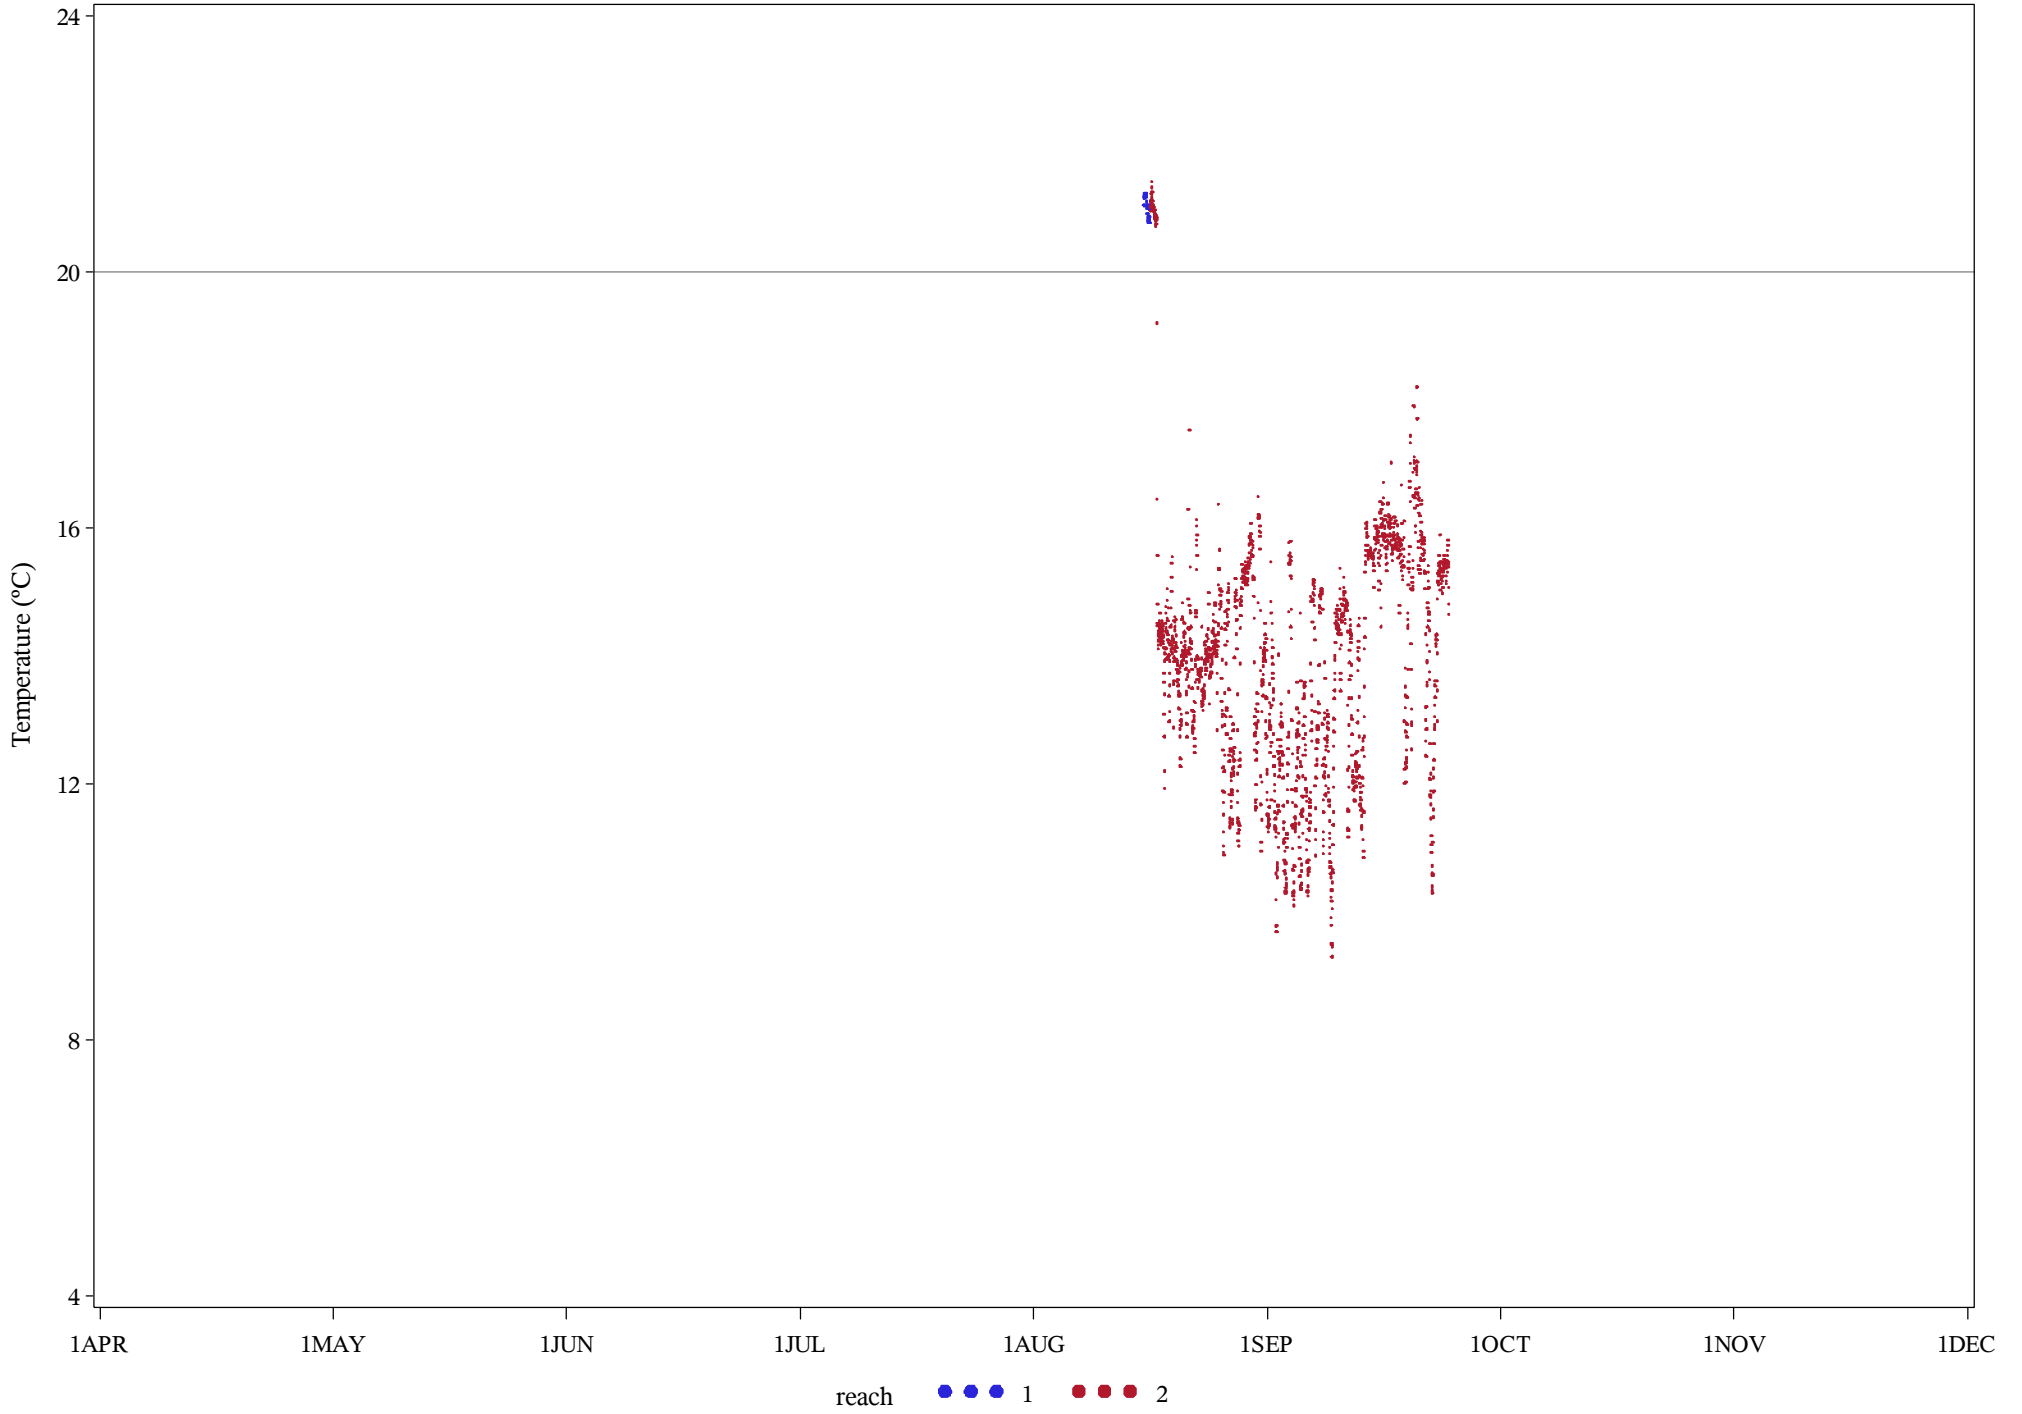

Steelhead  
4663A

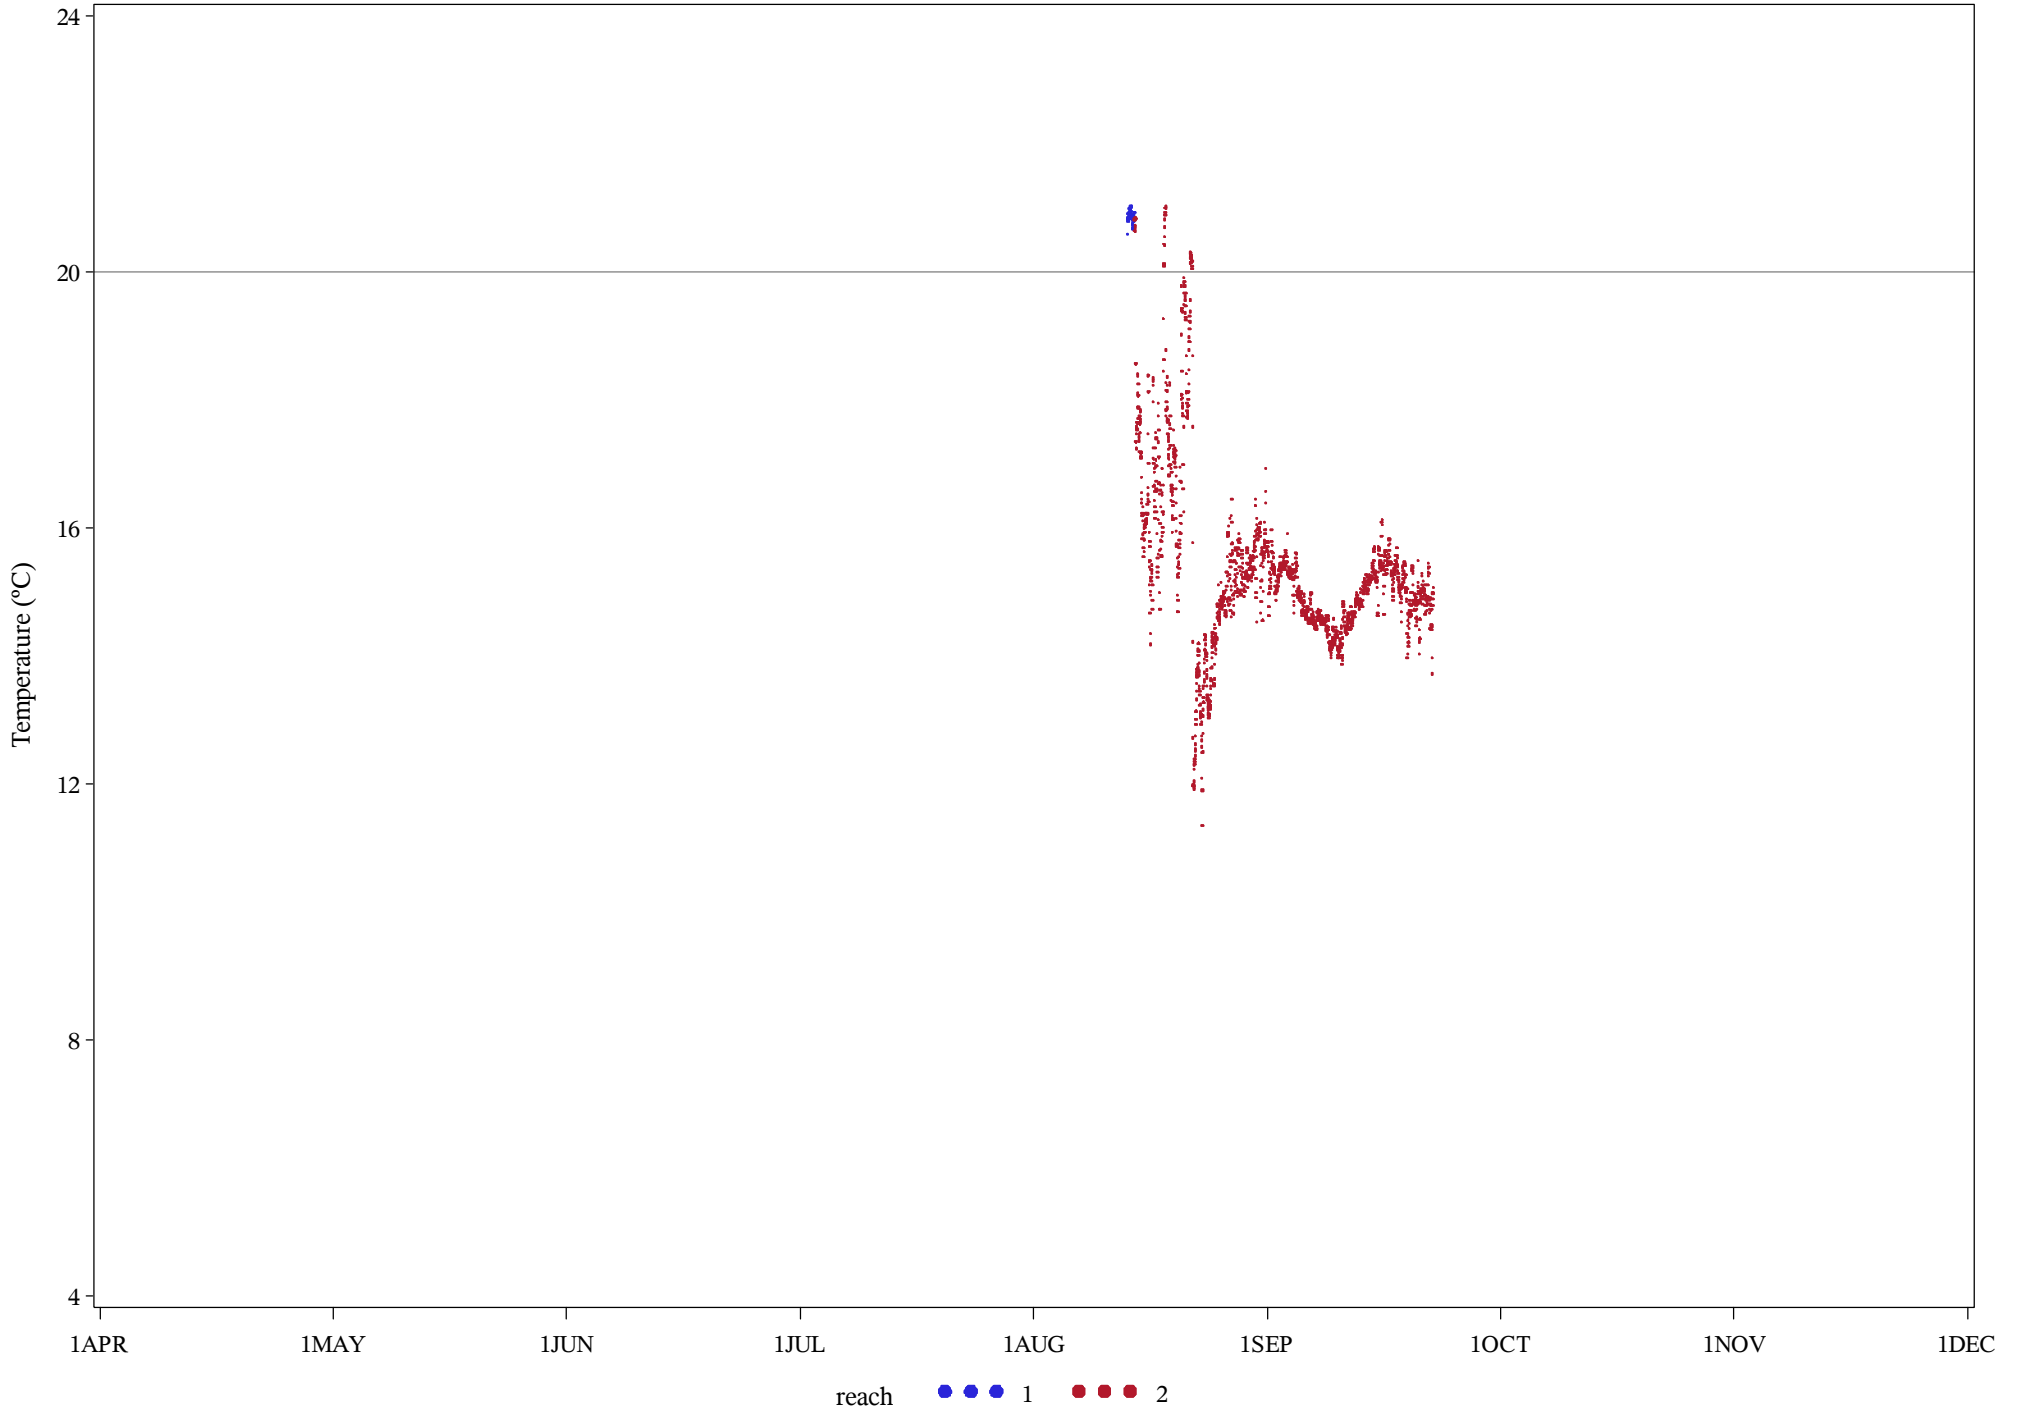

**Steelhead  
4664A**

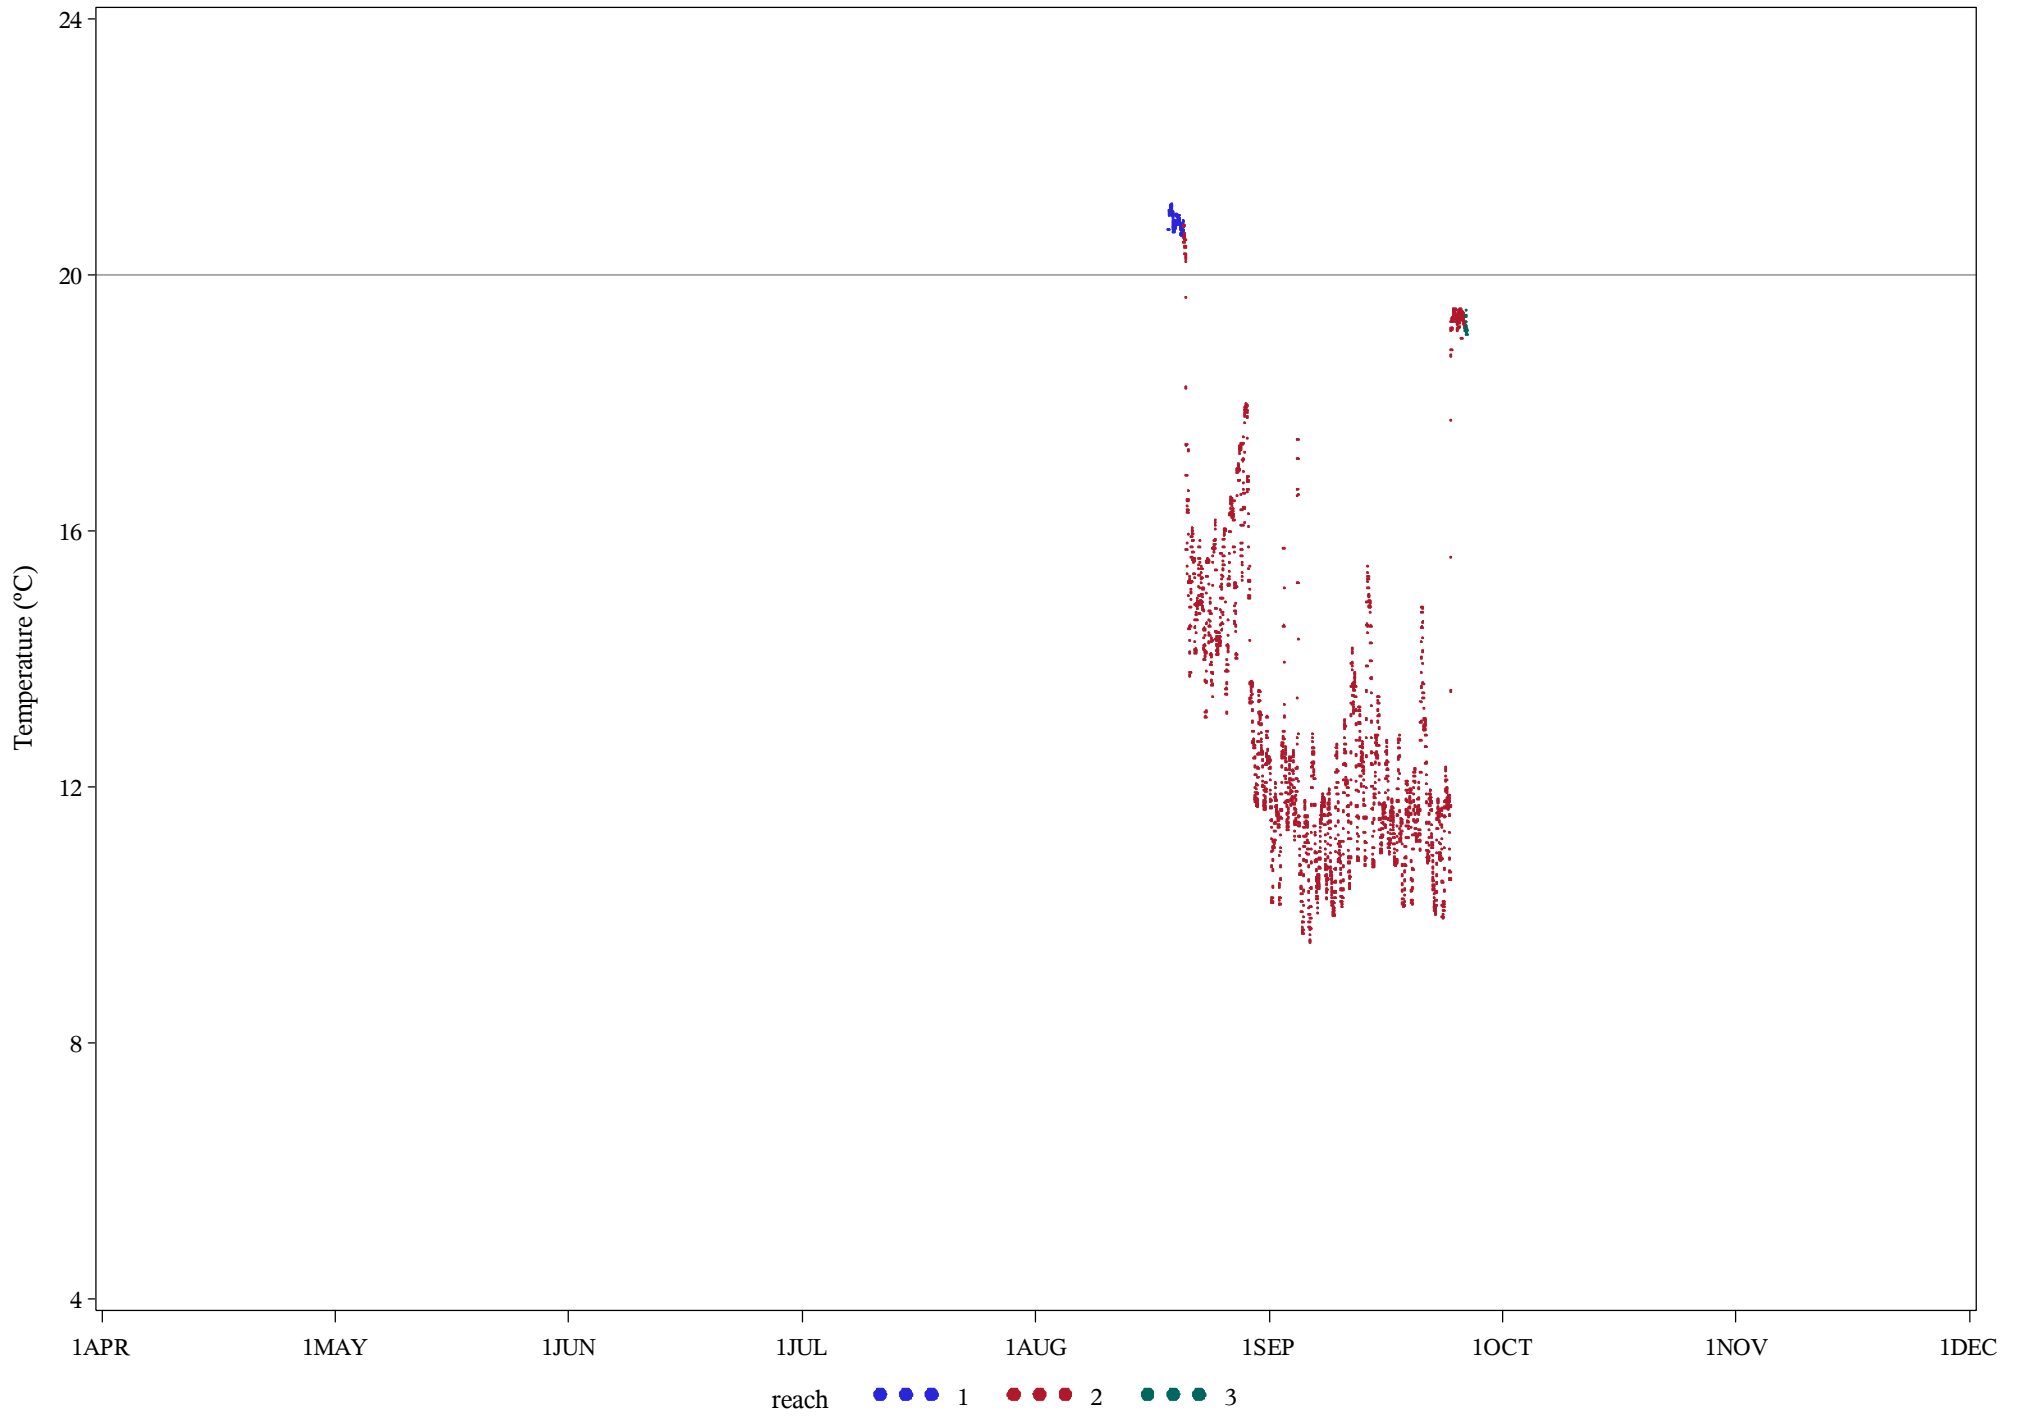





# Steelhead 4690A

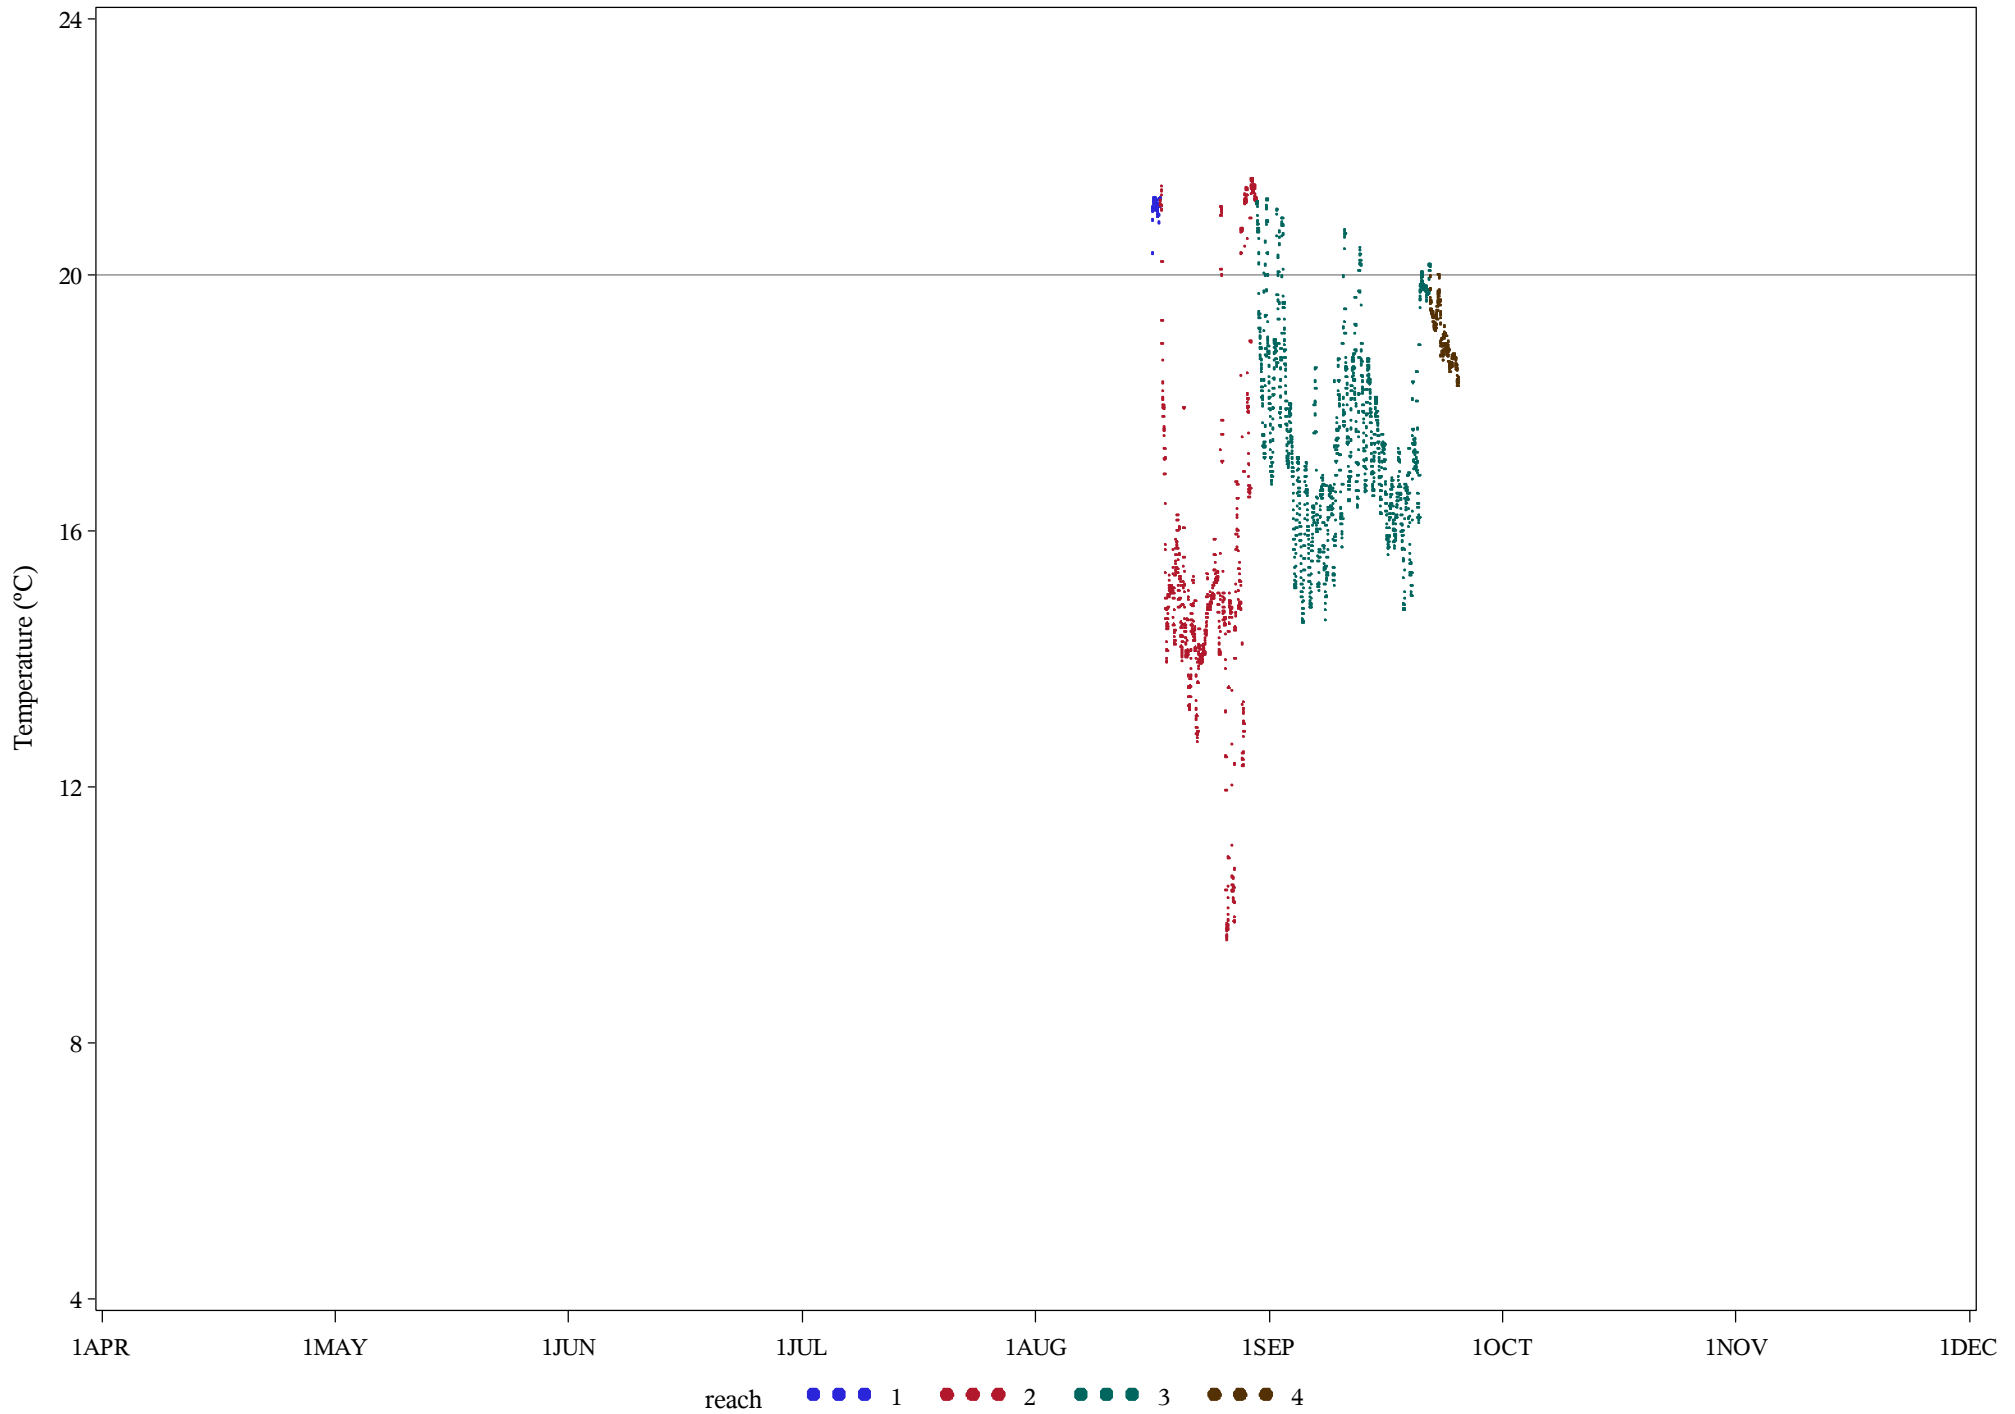

# Steelhead 4701A

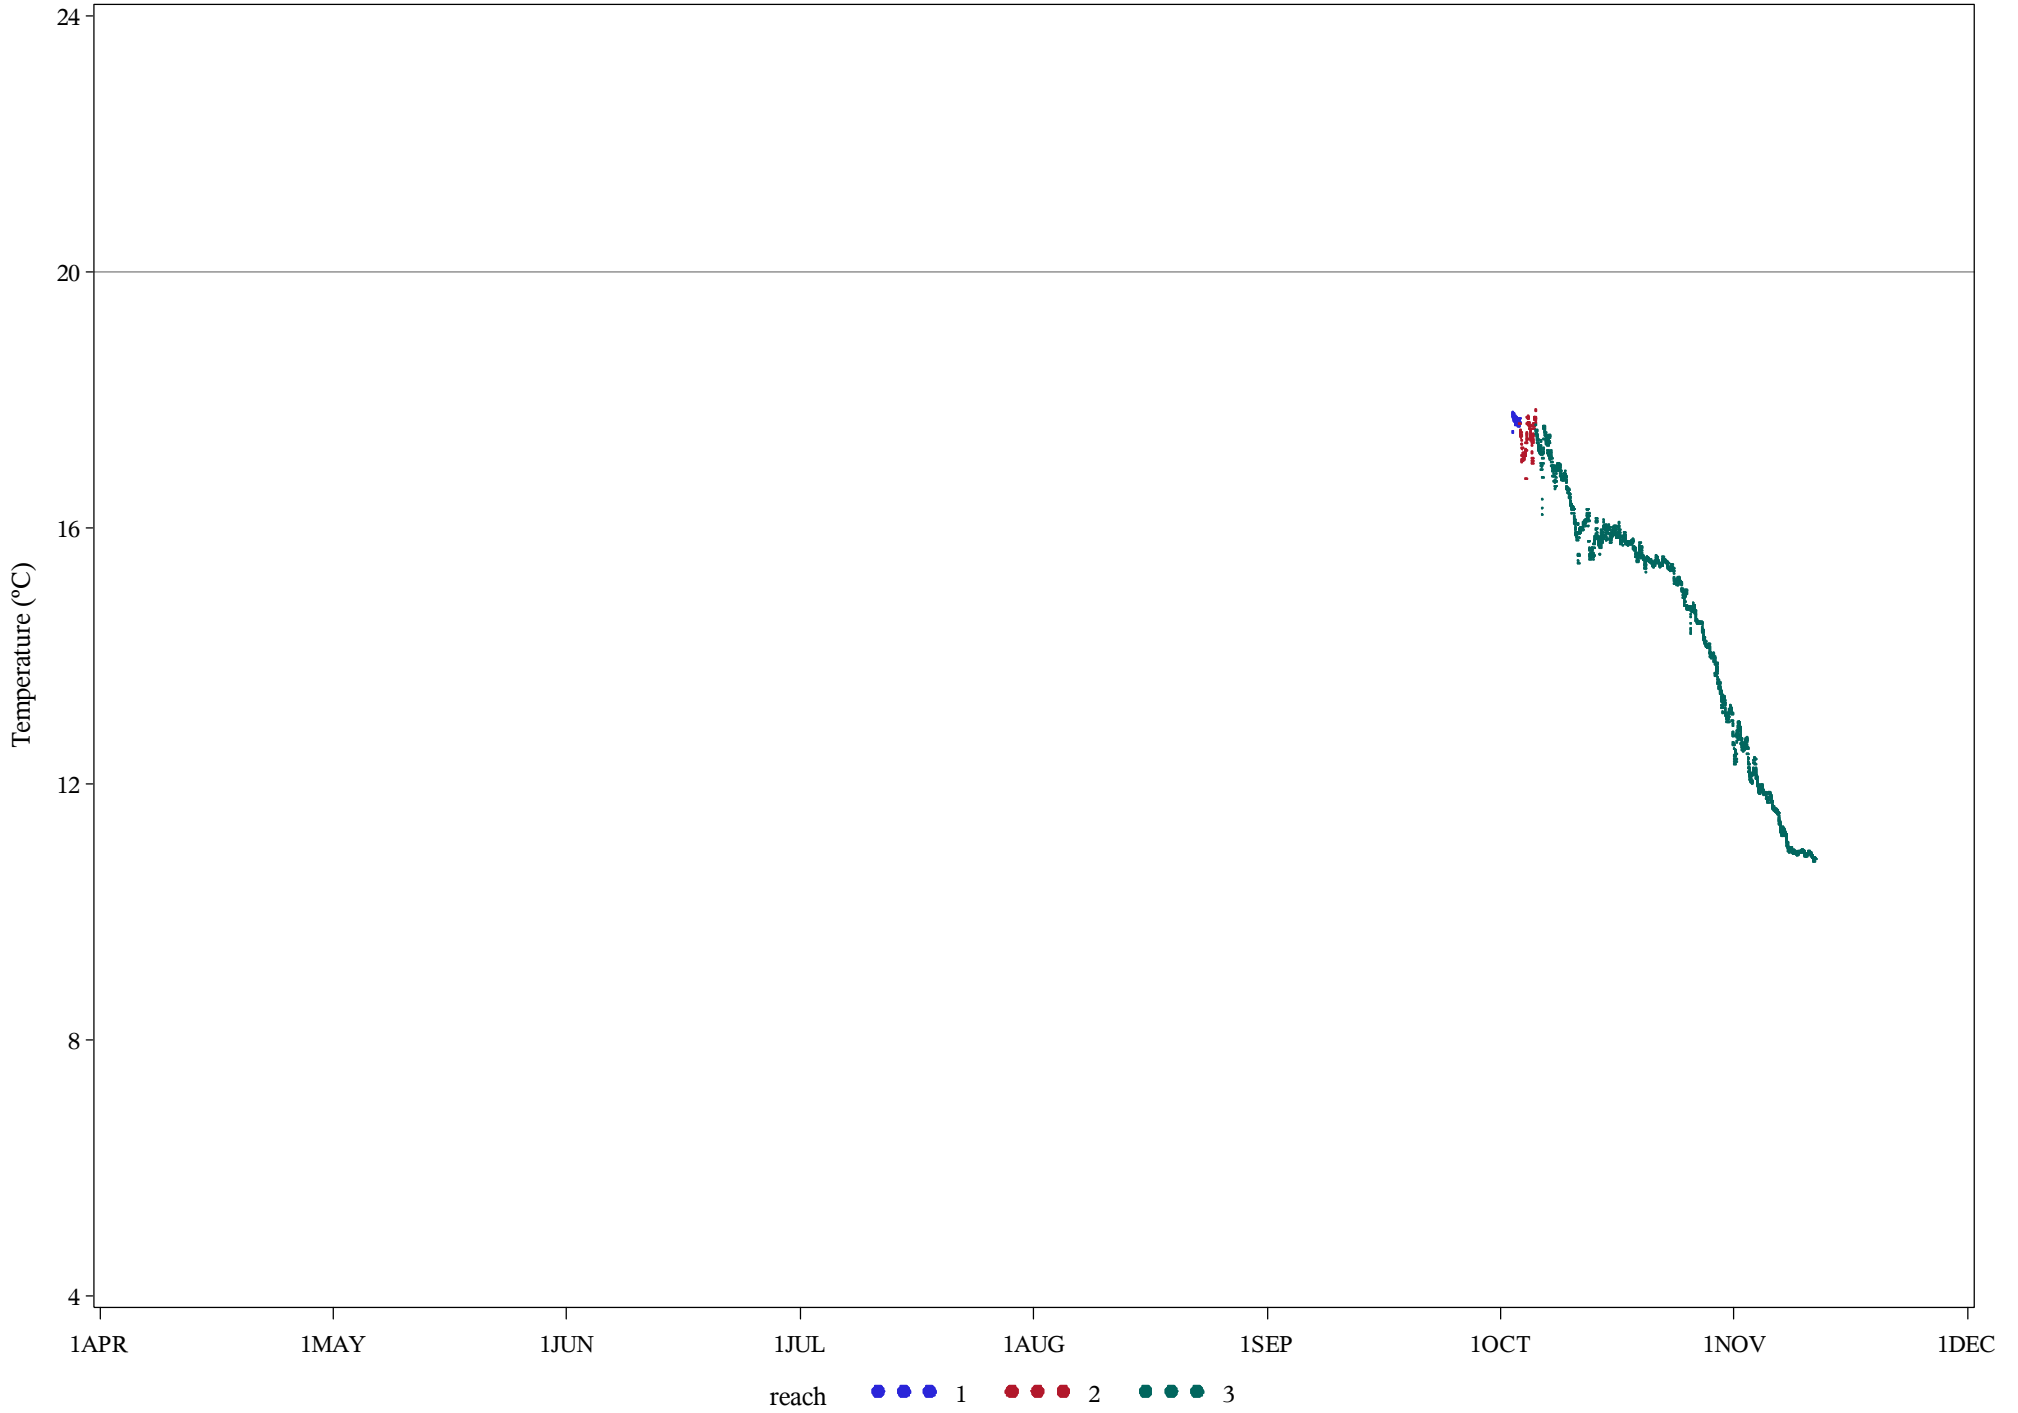

# Steelhead 4730B

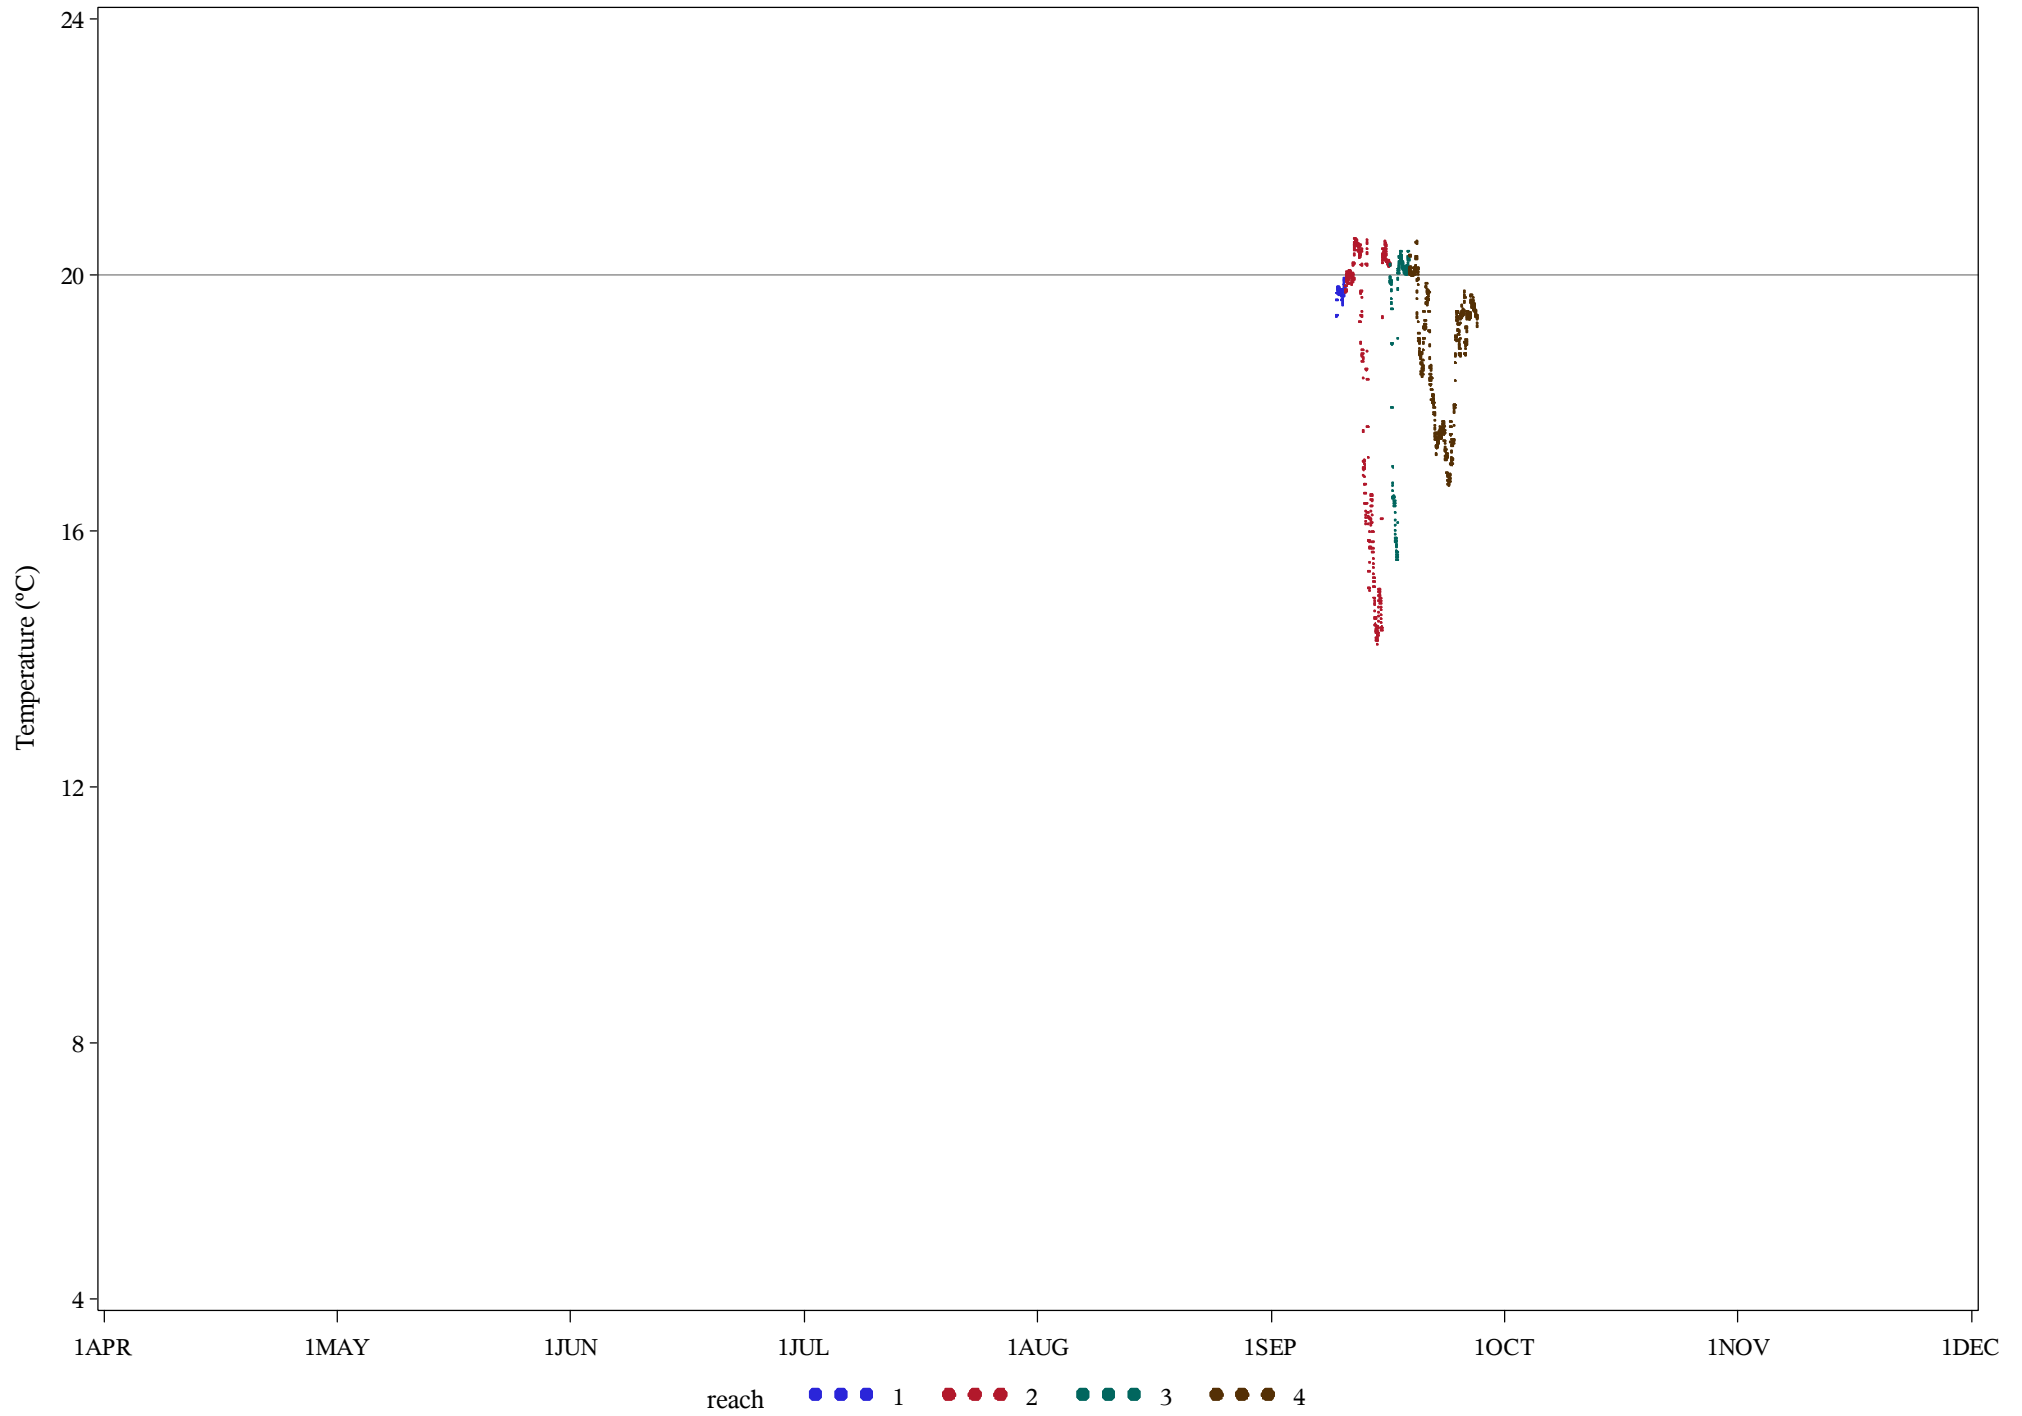

# Steelhead 4732B

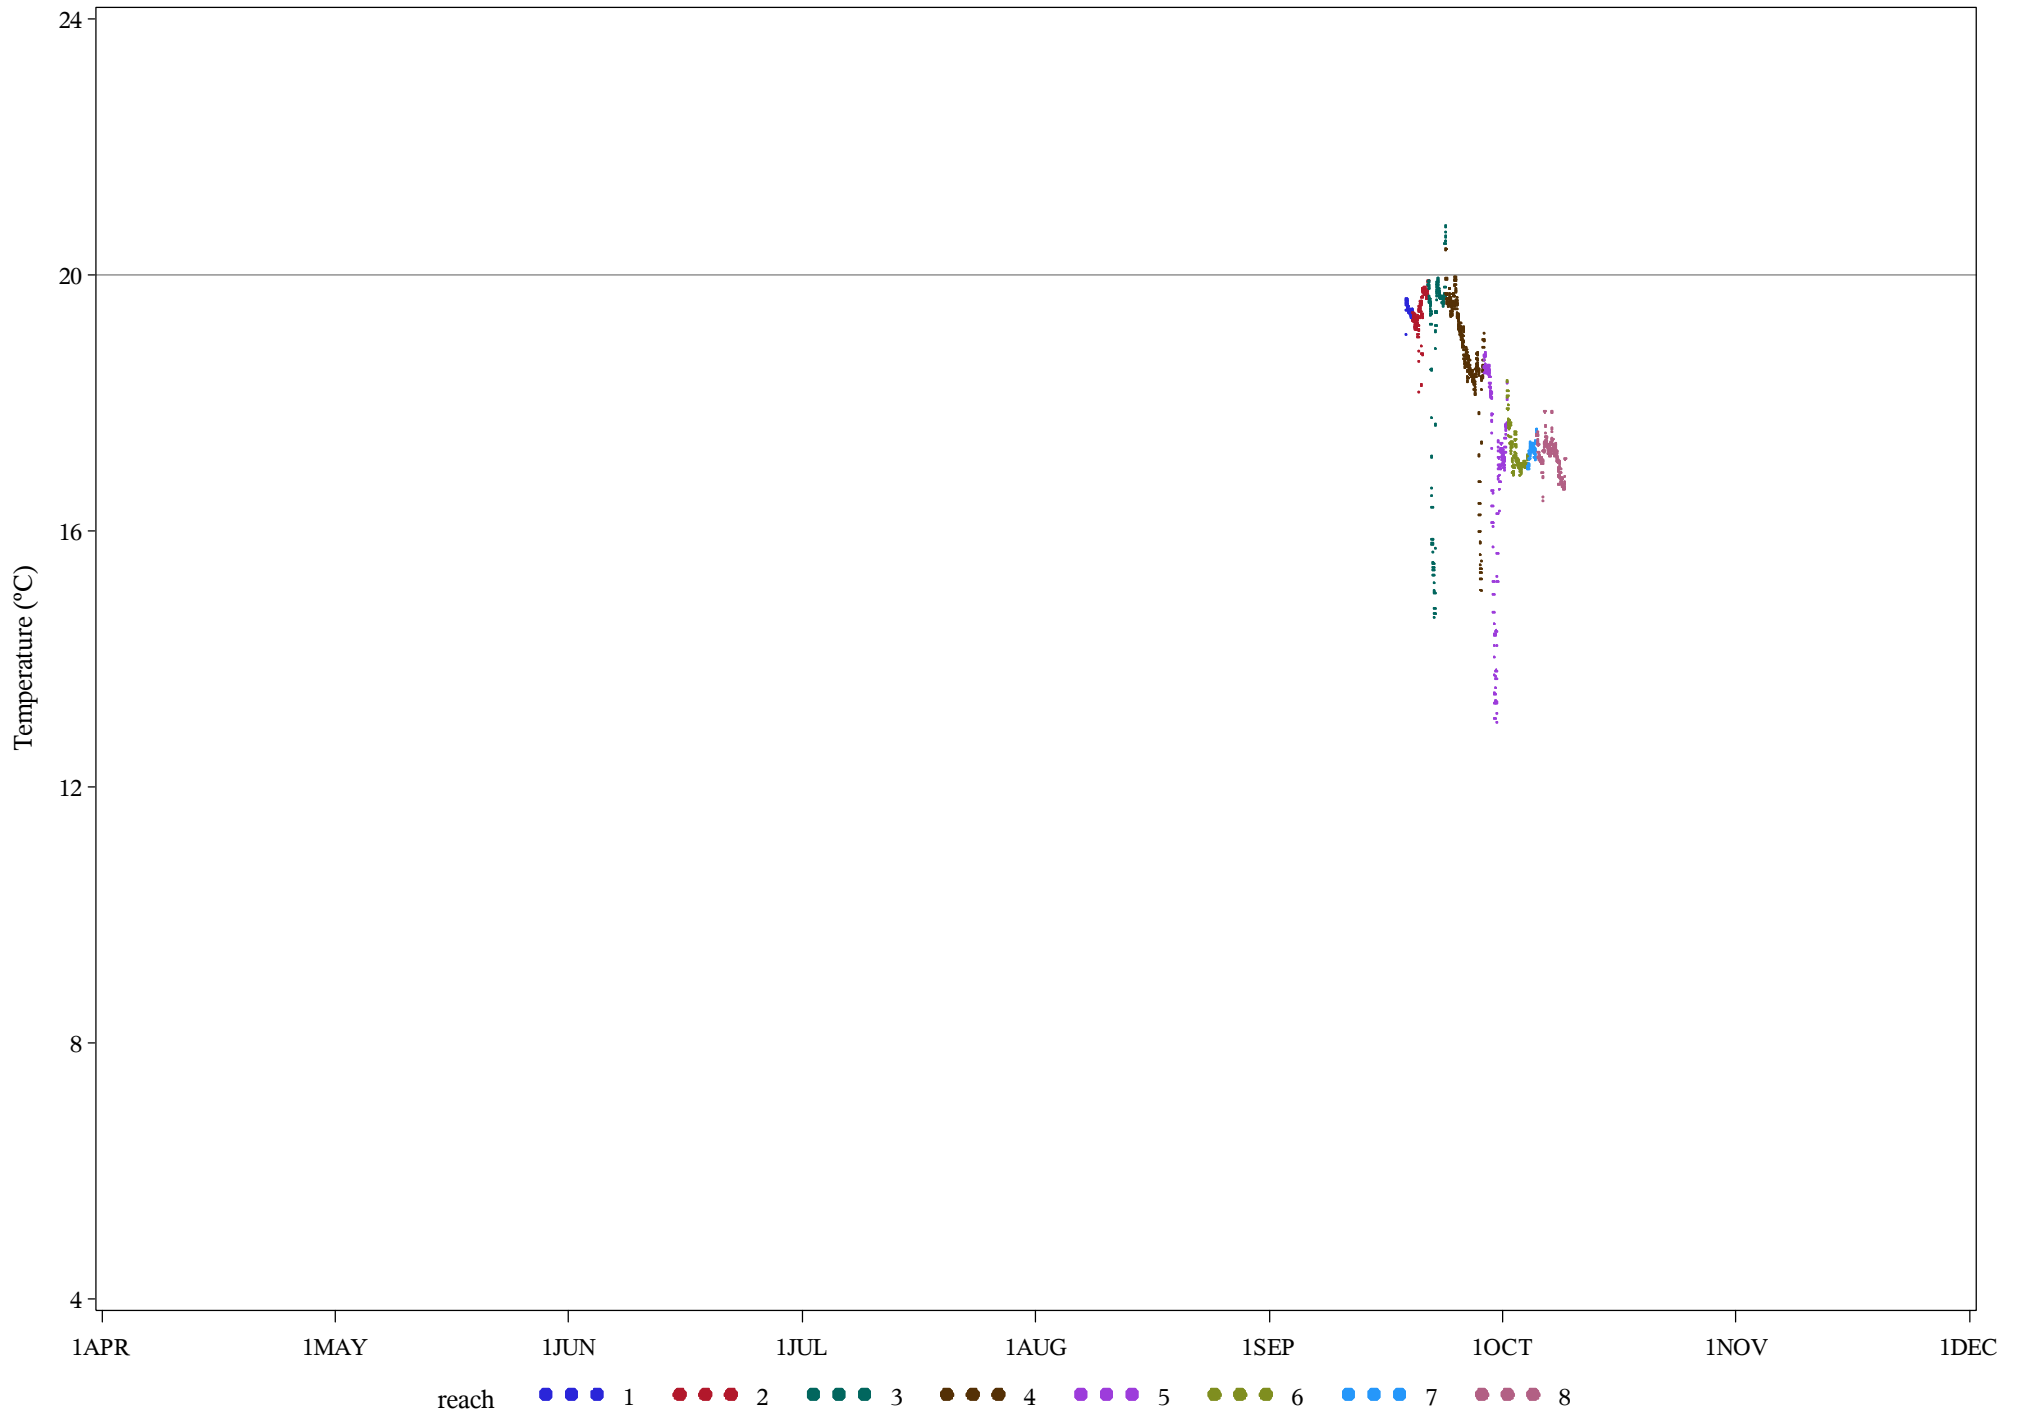

# Steelhead 4734B

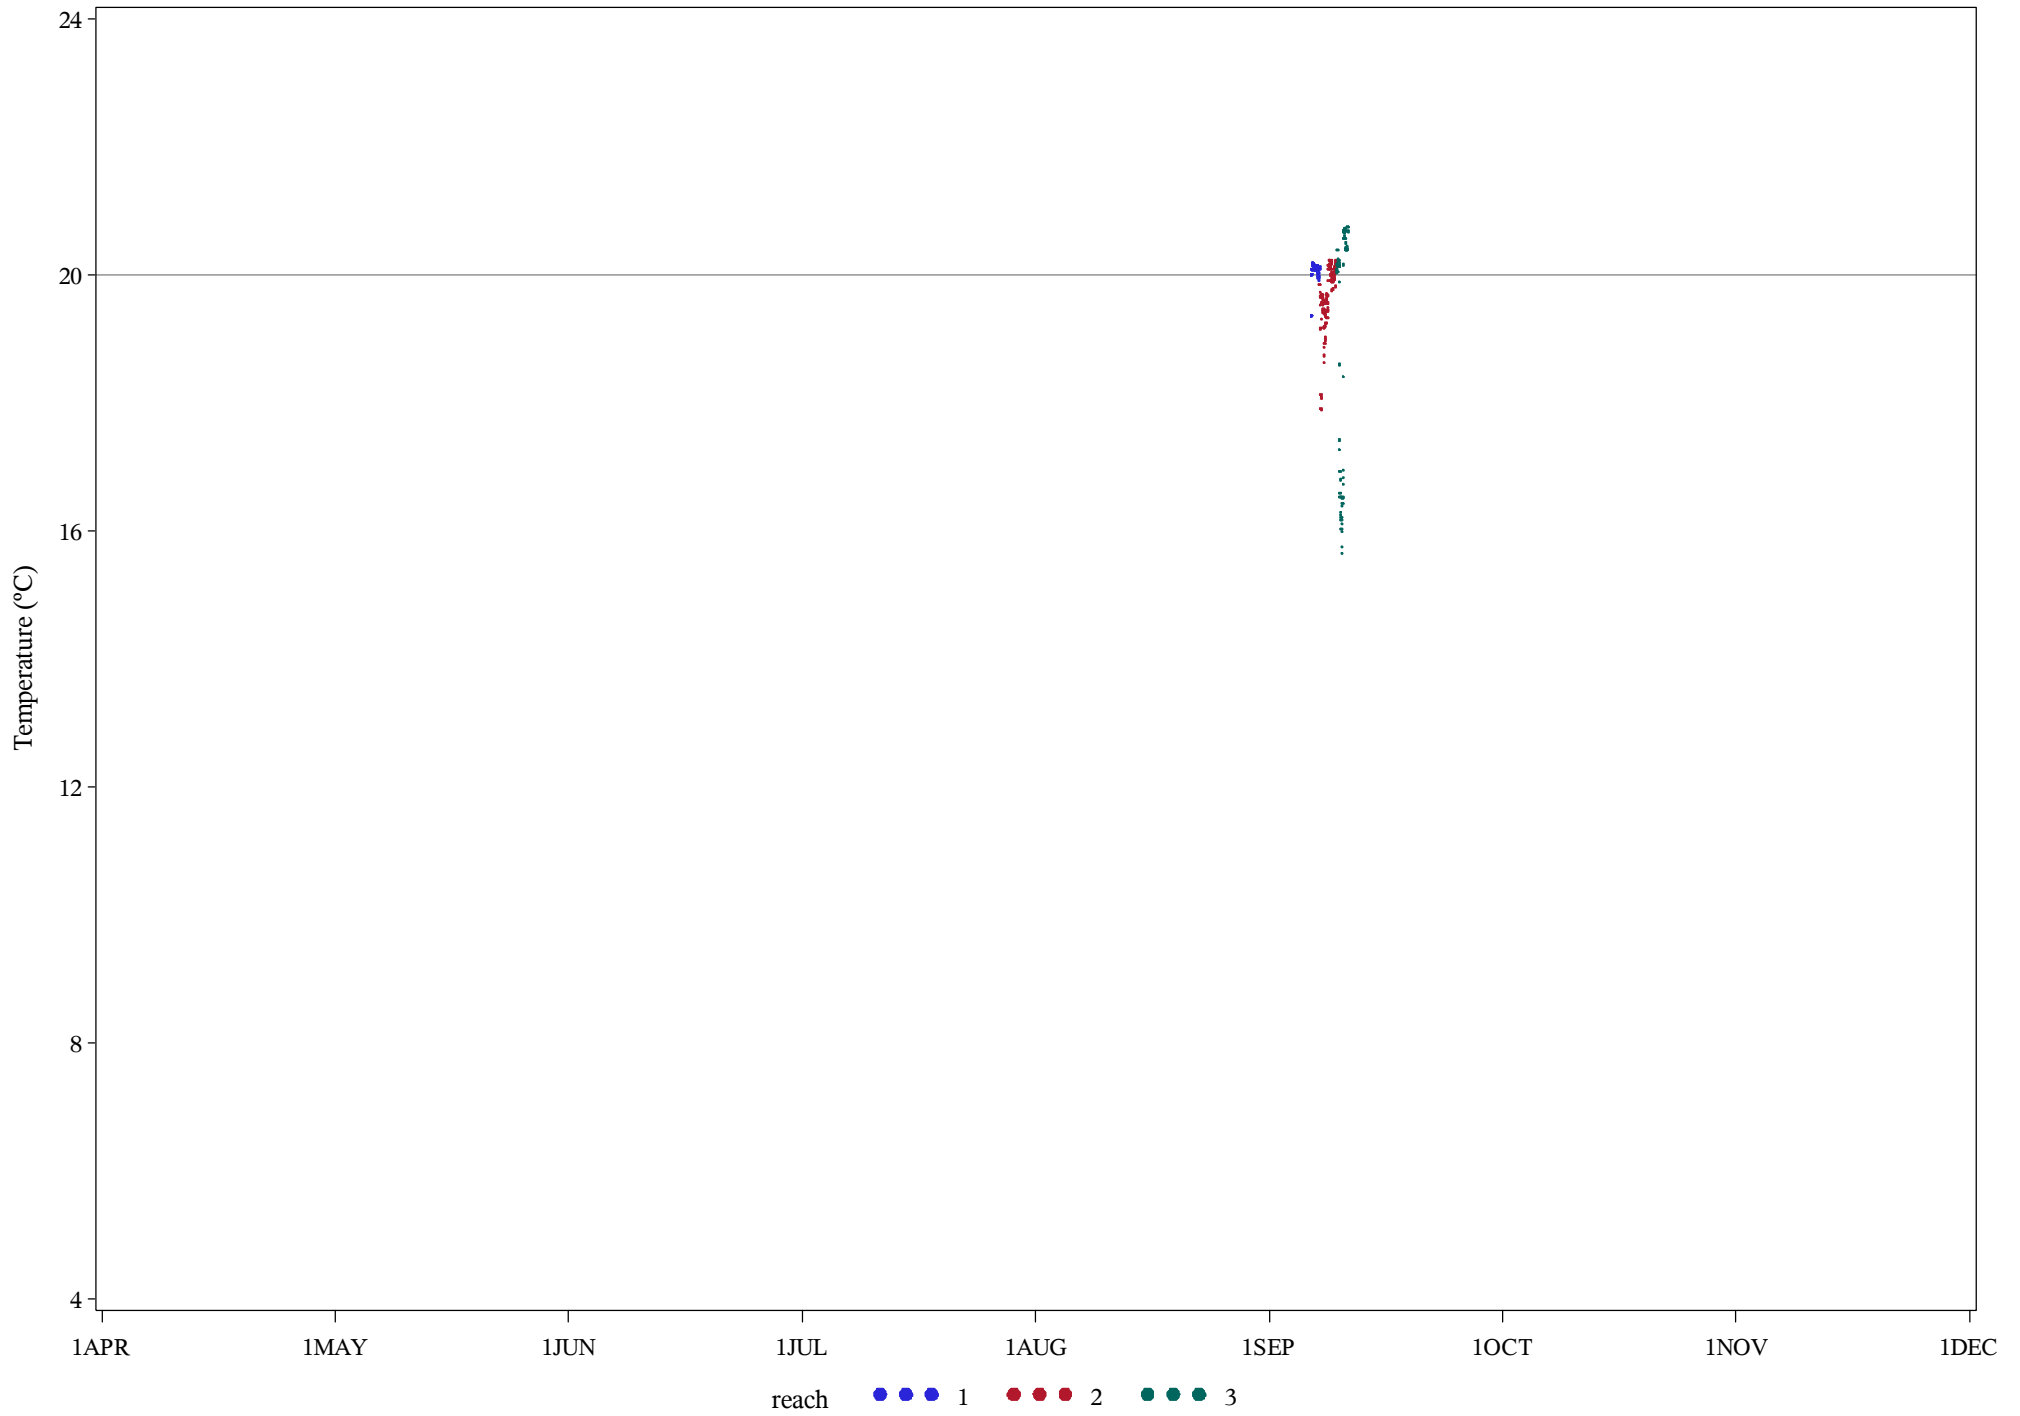

Steelhead  
4739A

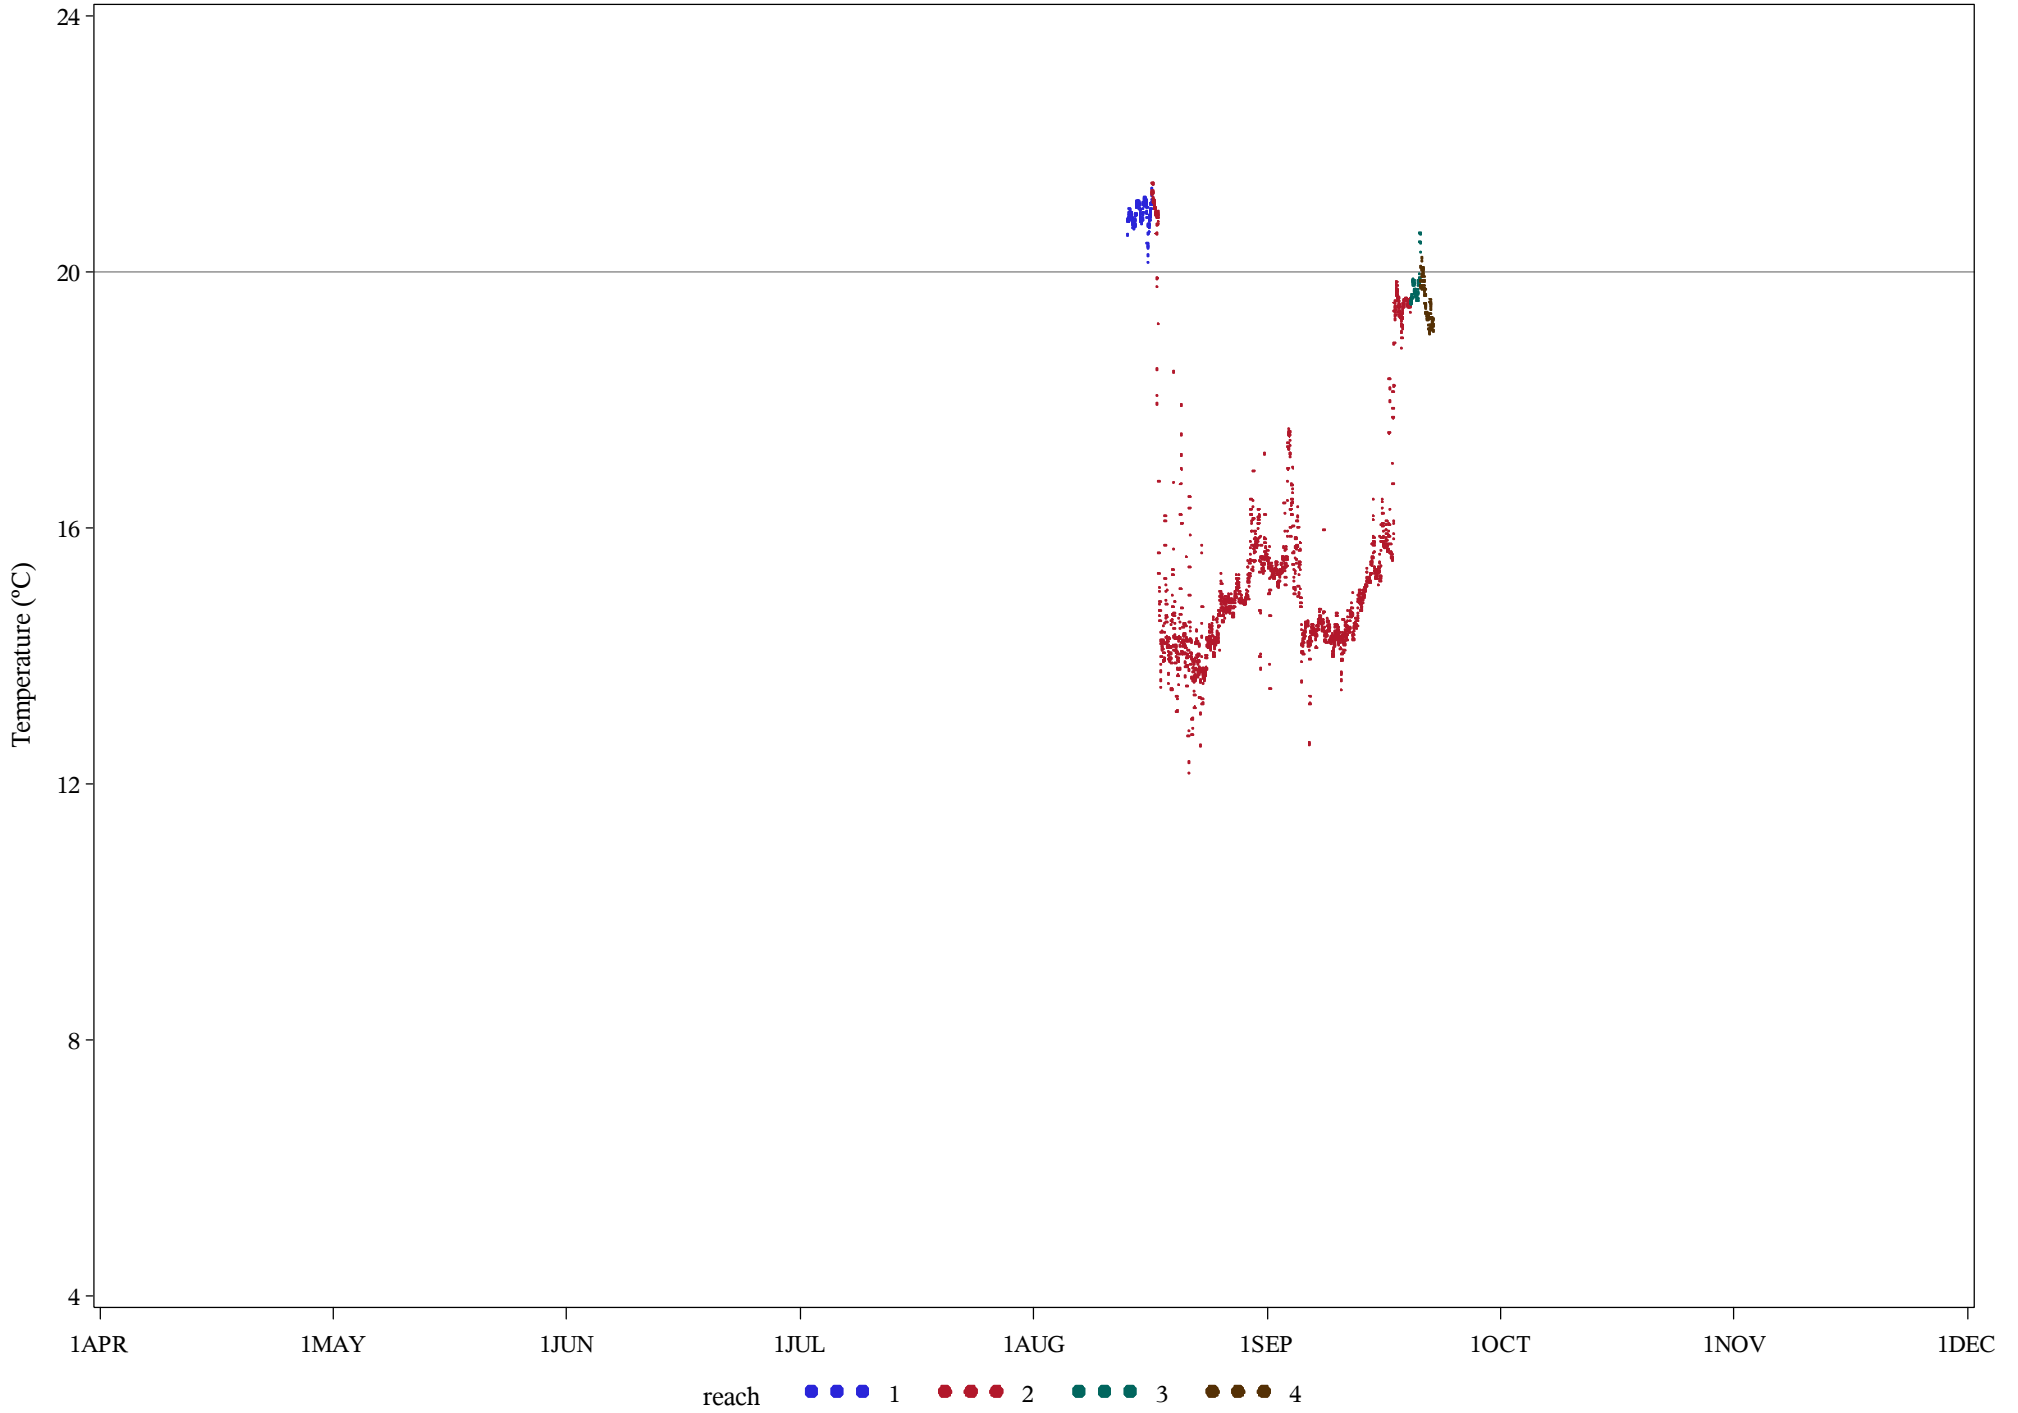

# Steelhead 4751B

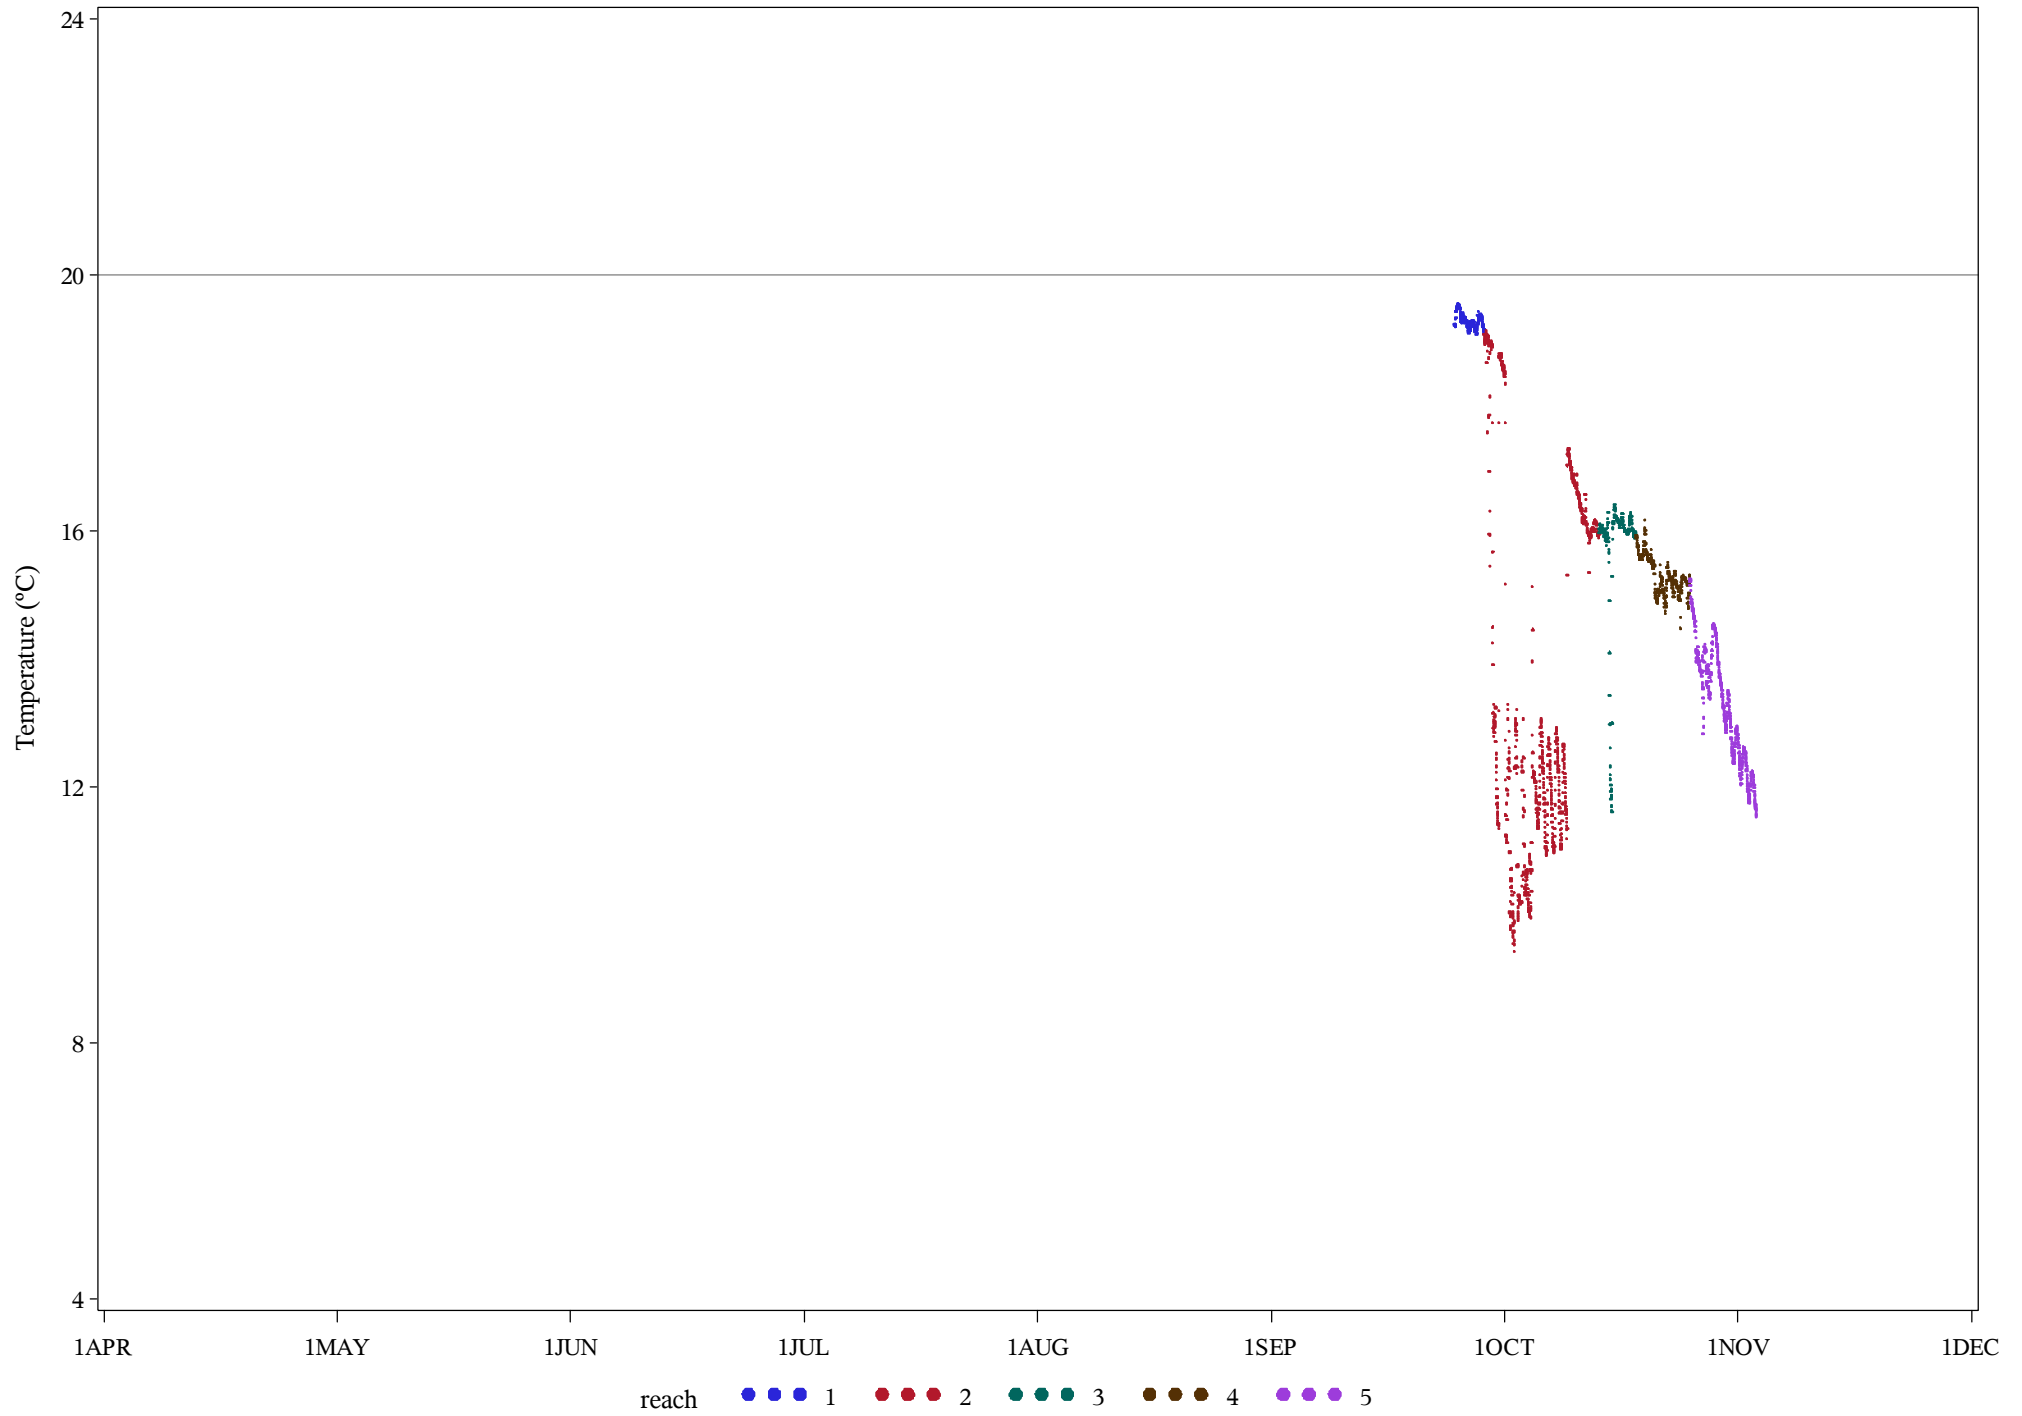



# Steelhead 4752B

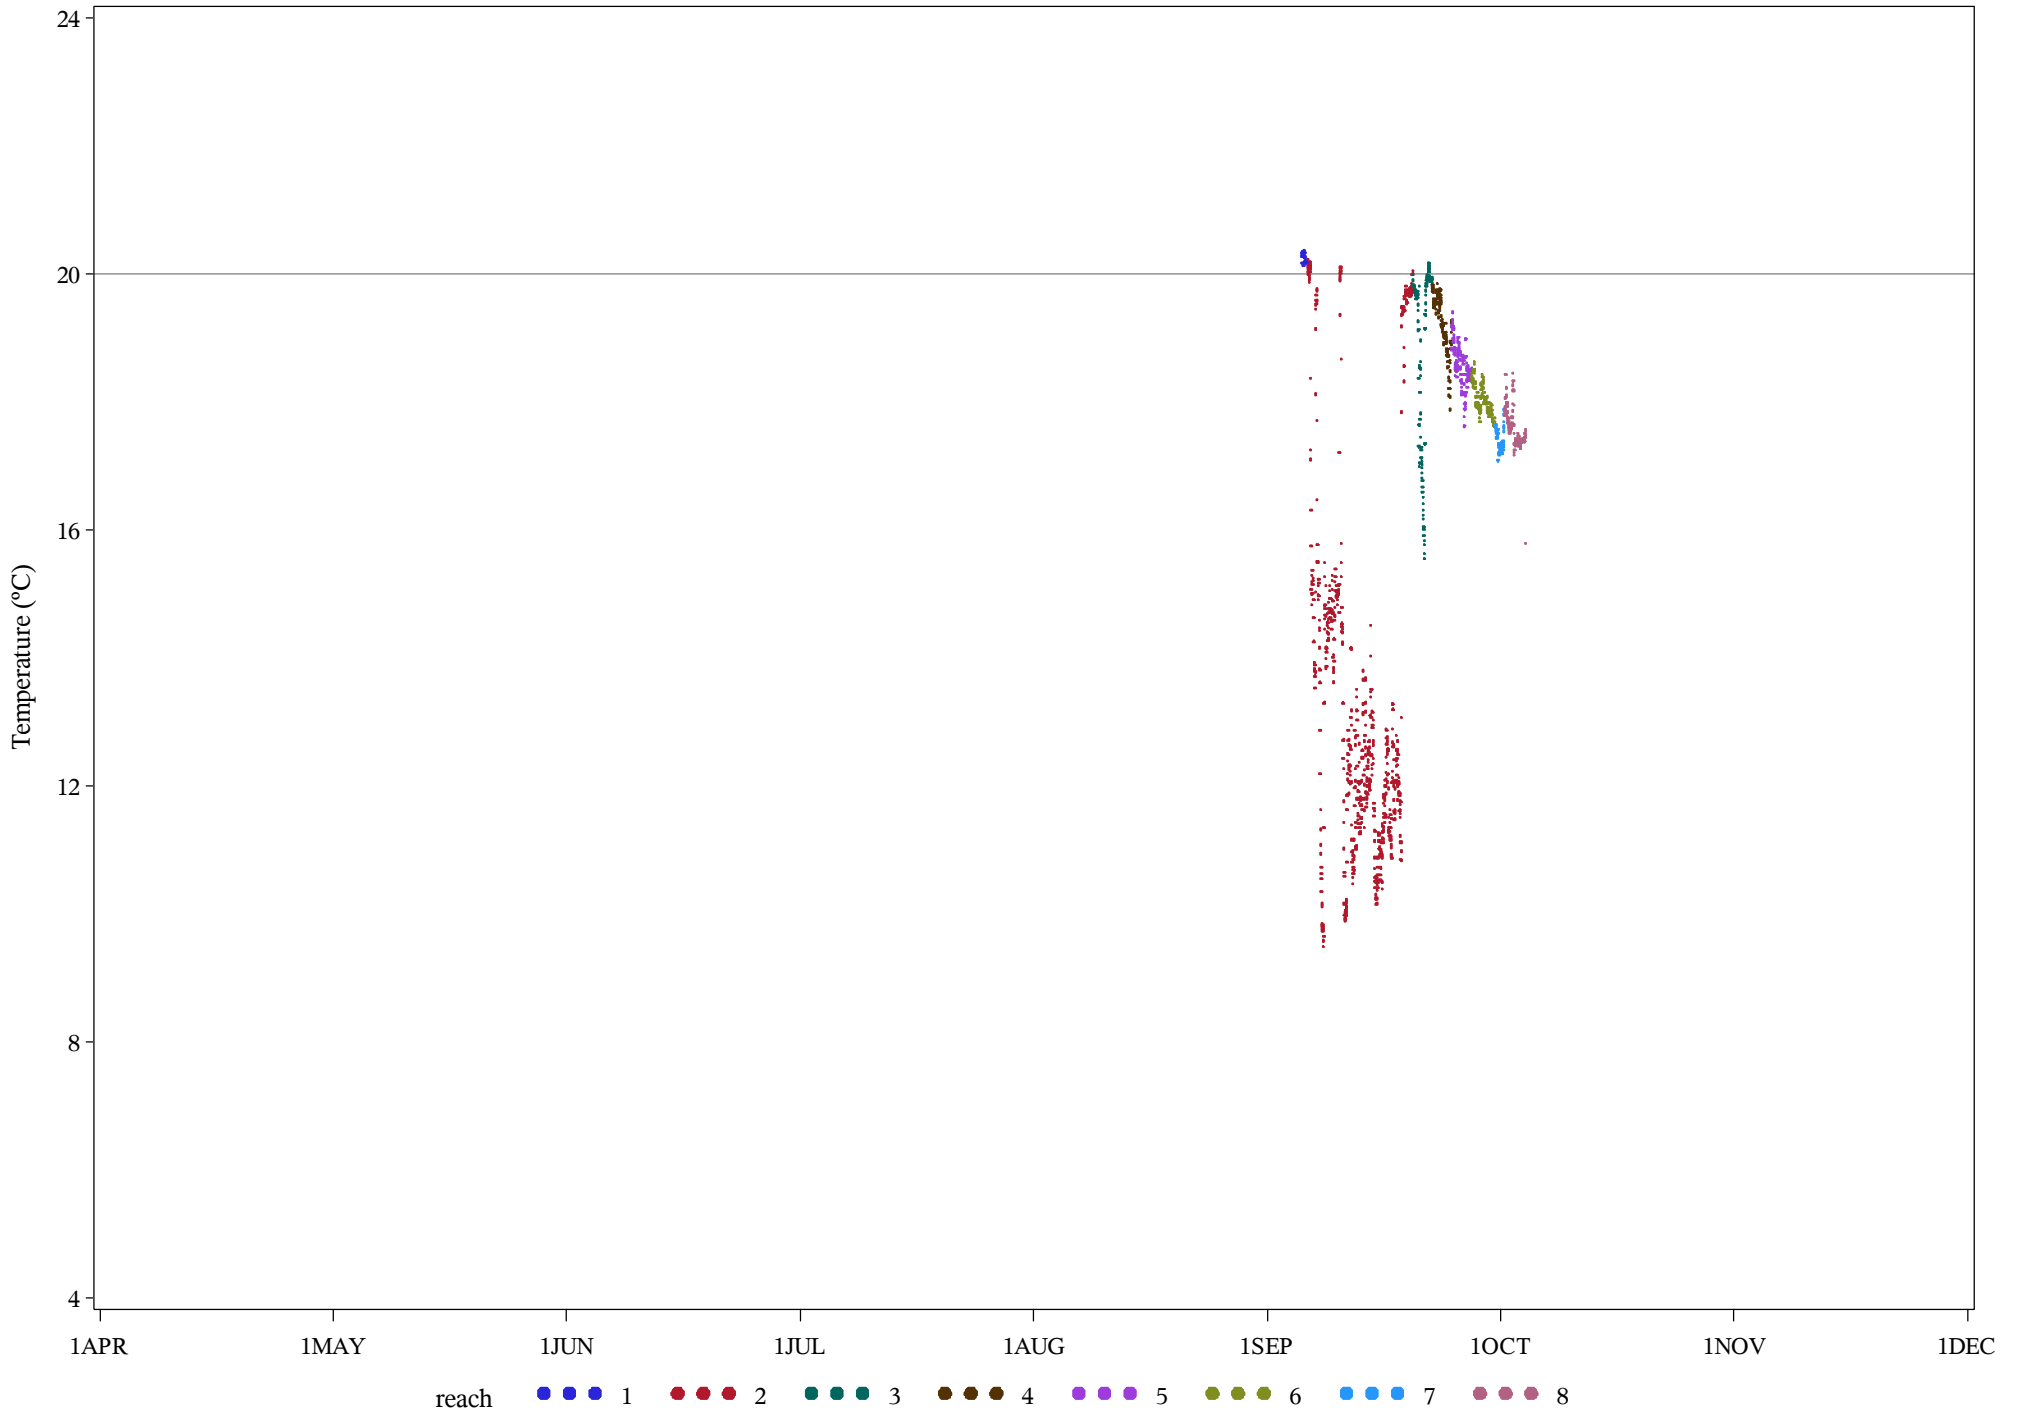



# Steelhead 4759B

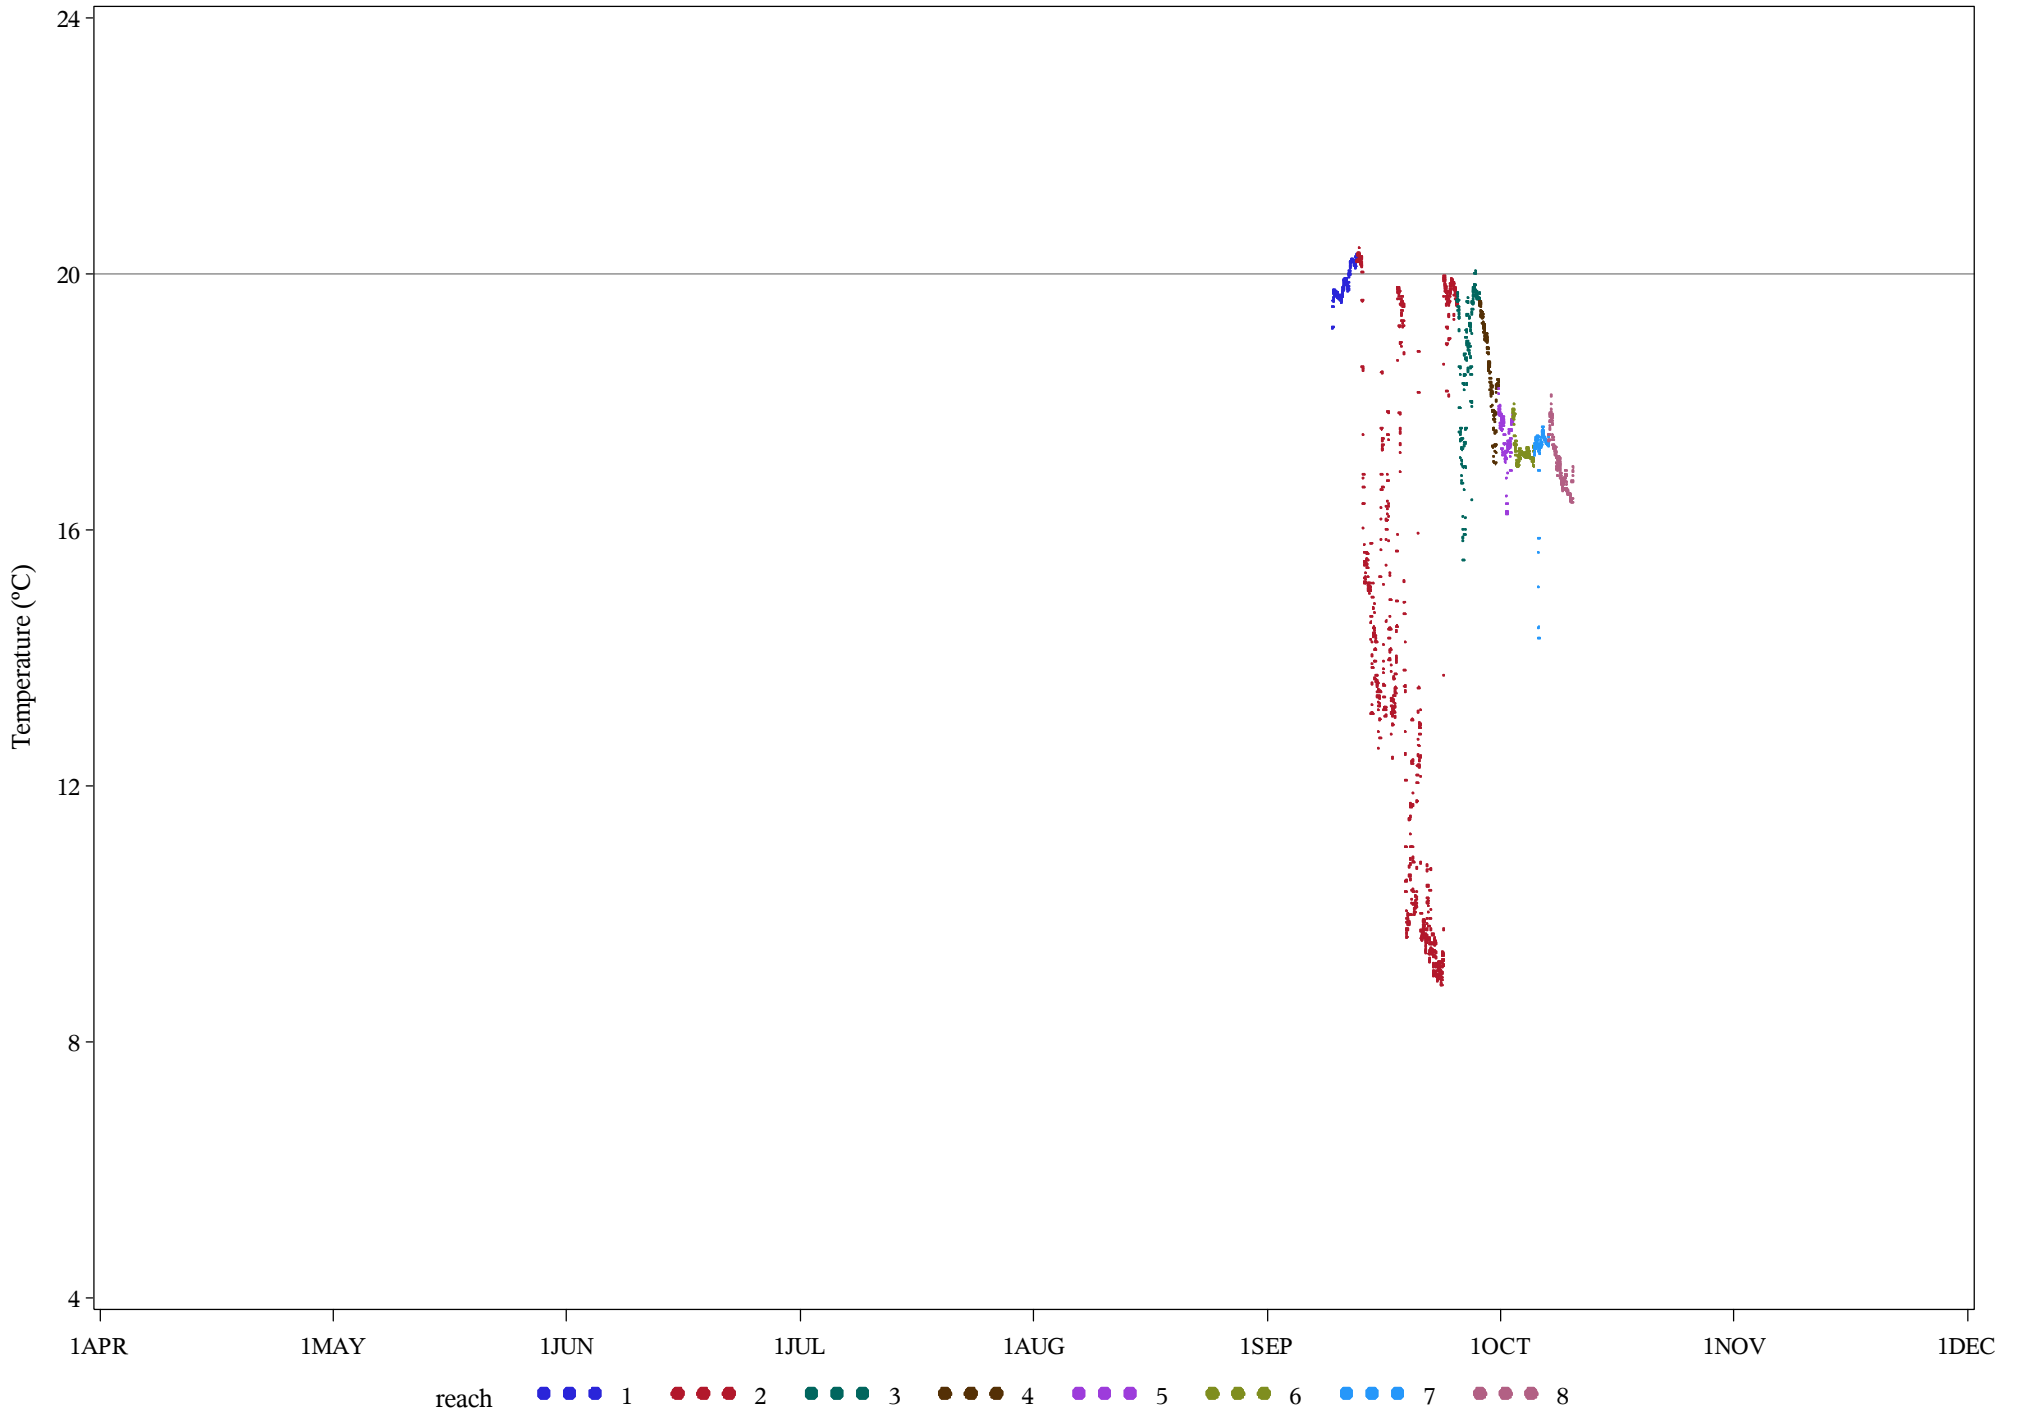

# Steelhead 4761B

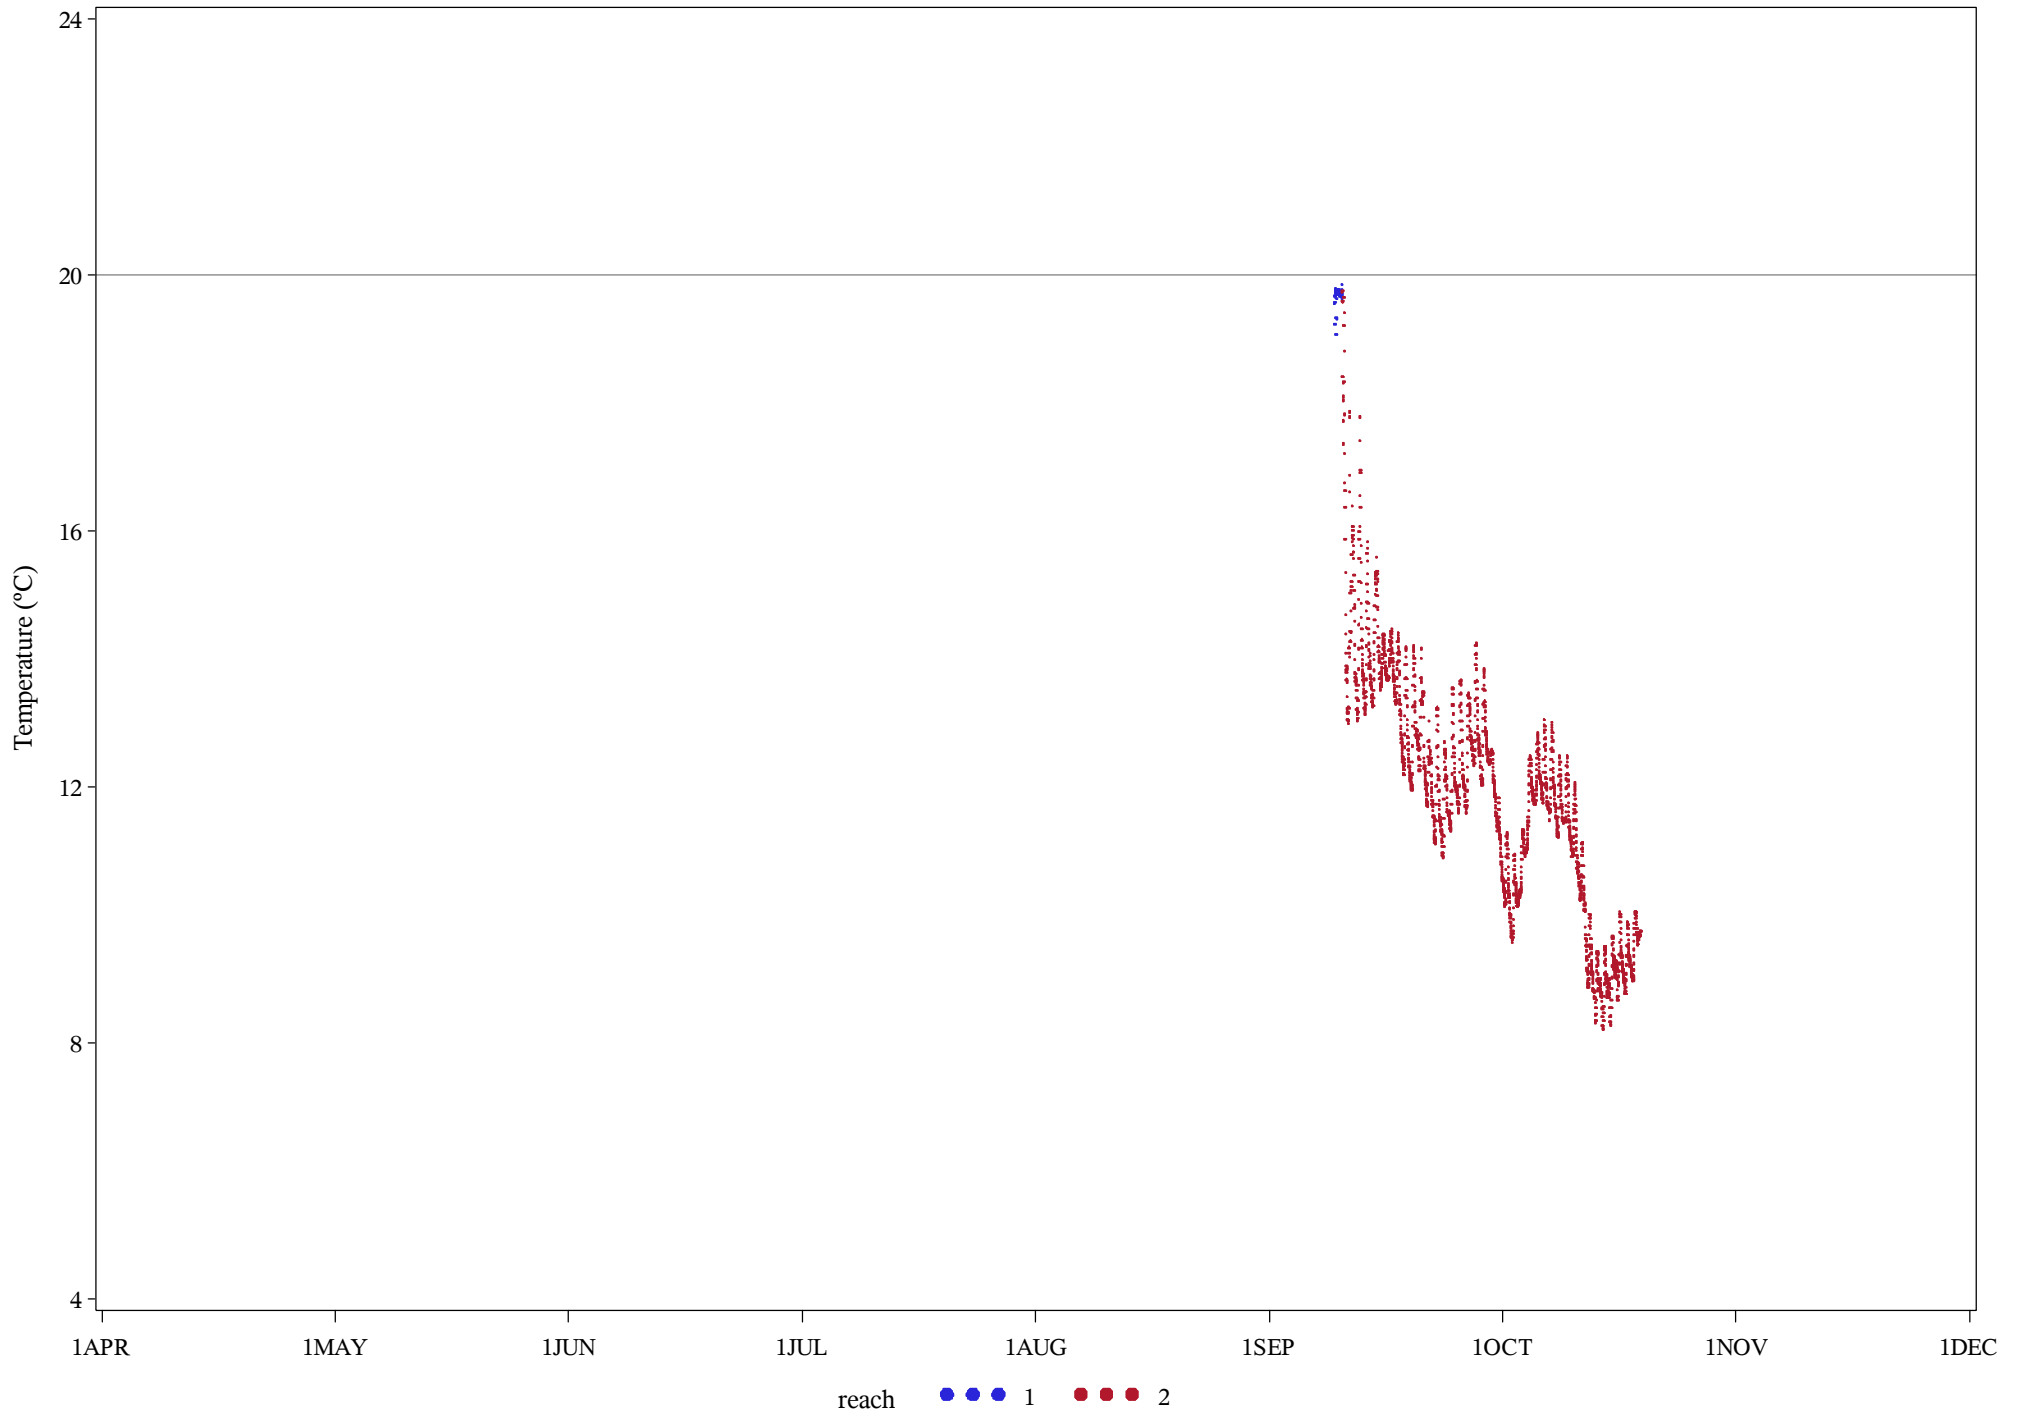

# Steelhead 4763B

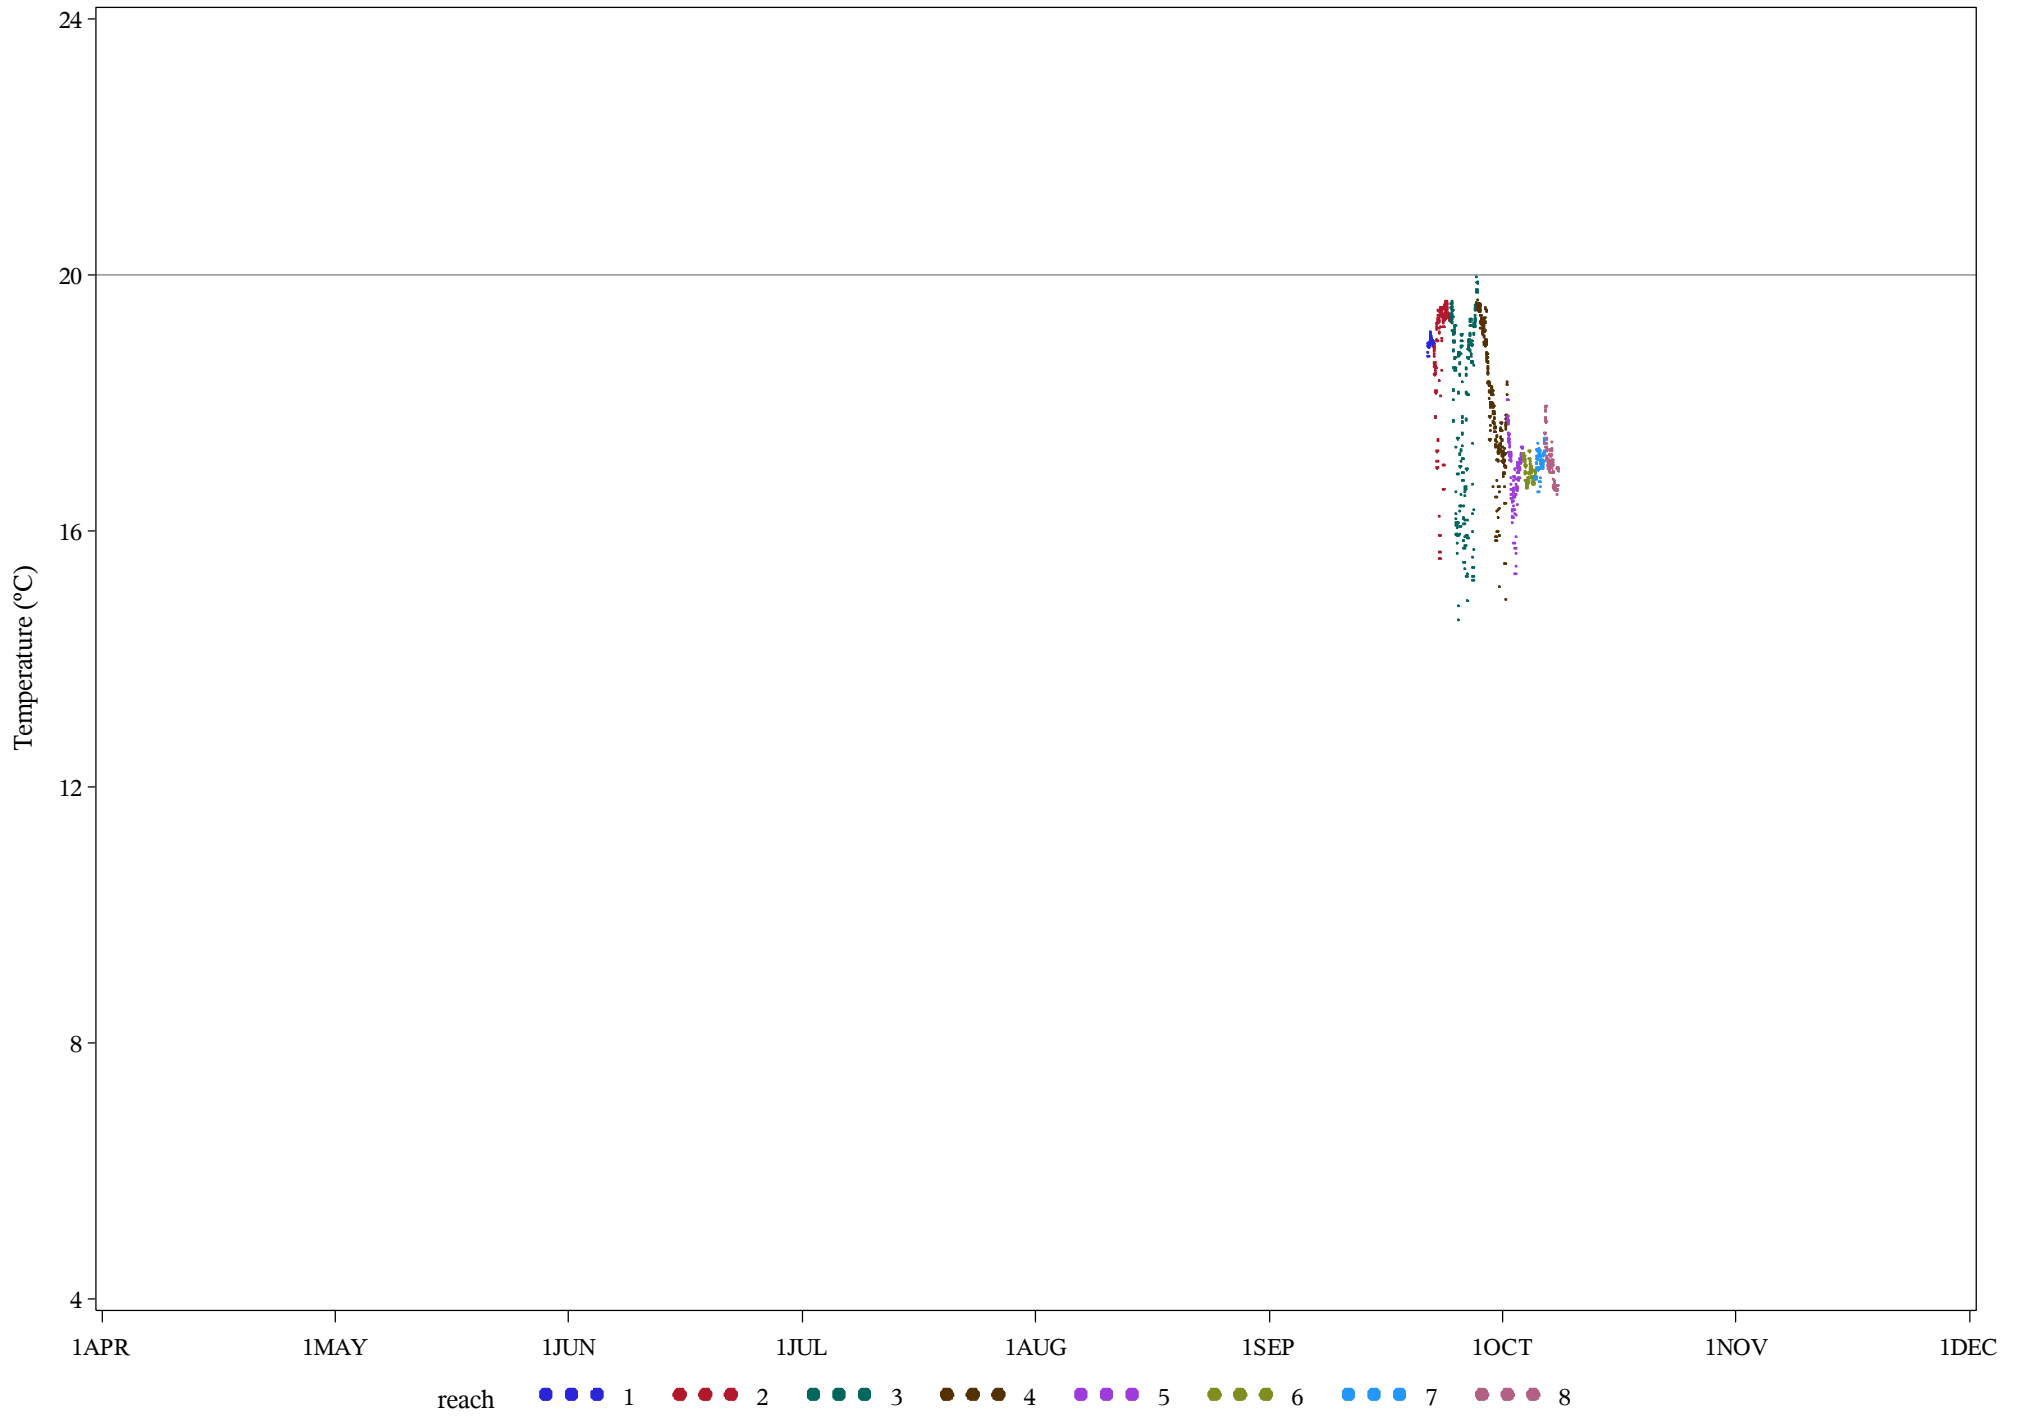

# Steelhead 4766B

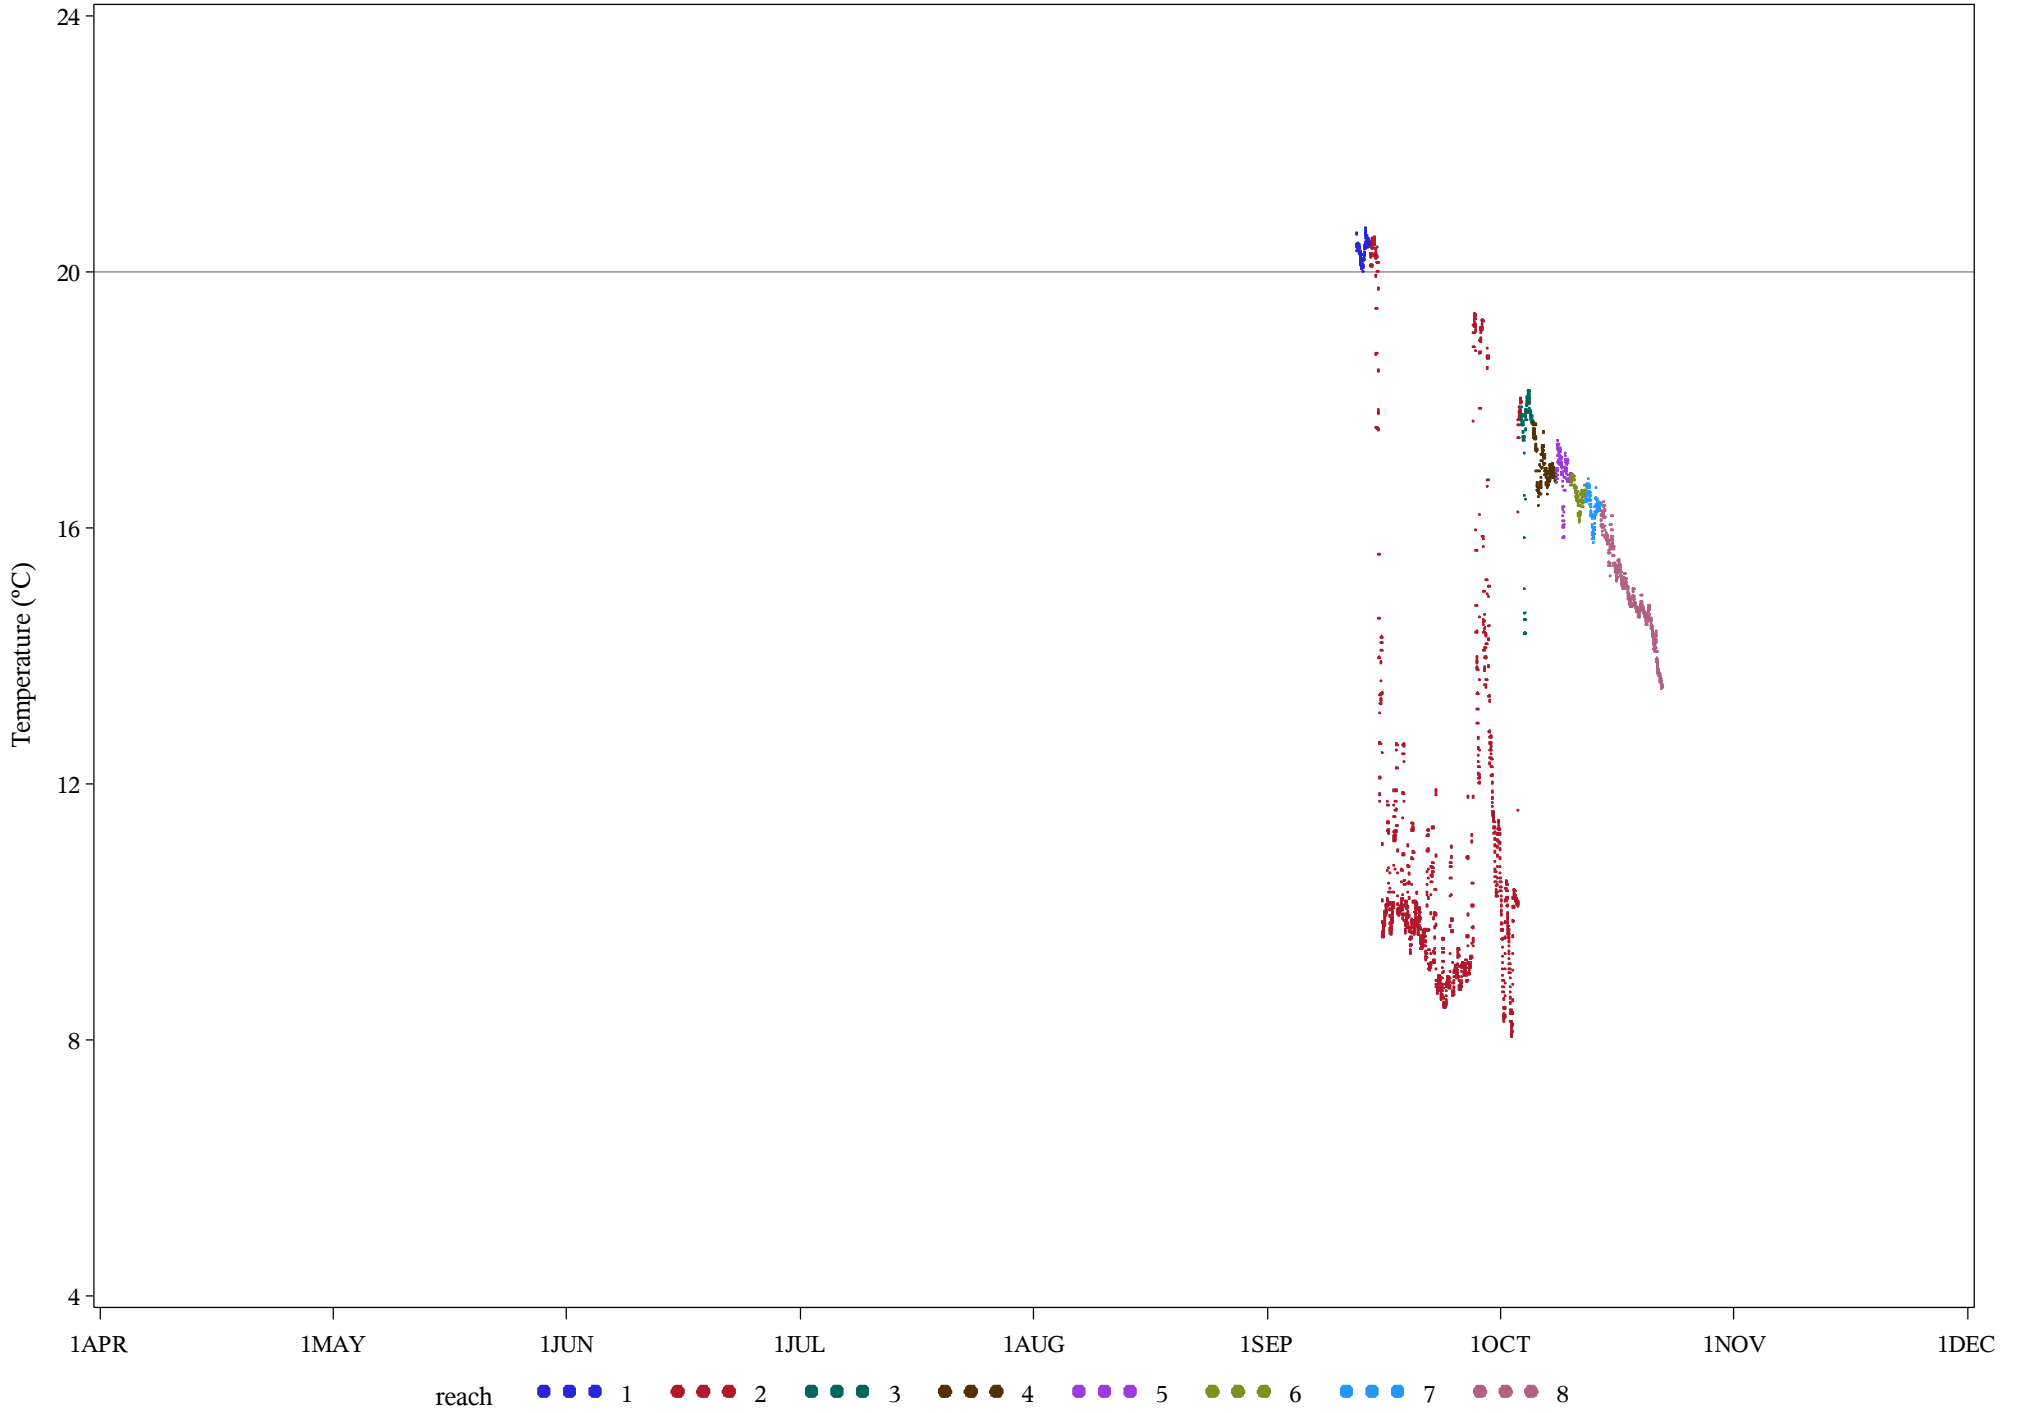

# Steelhead 4768A

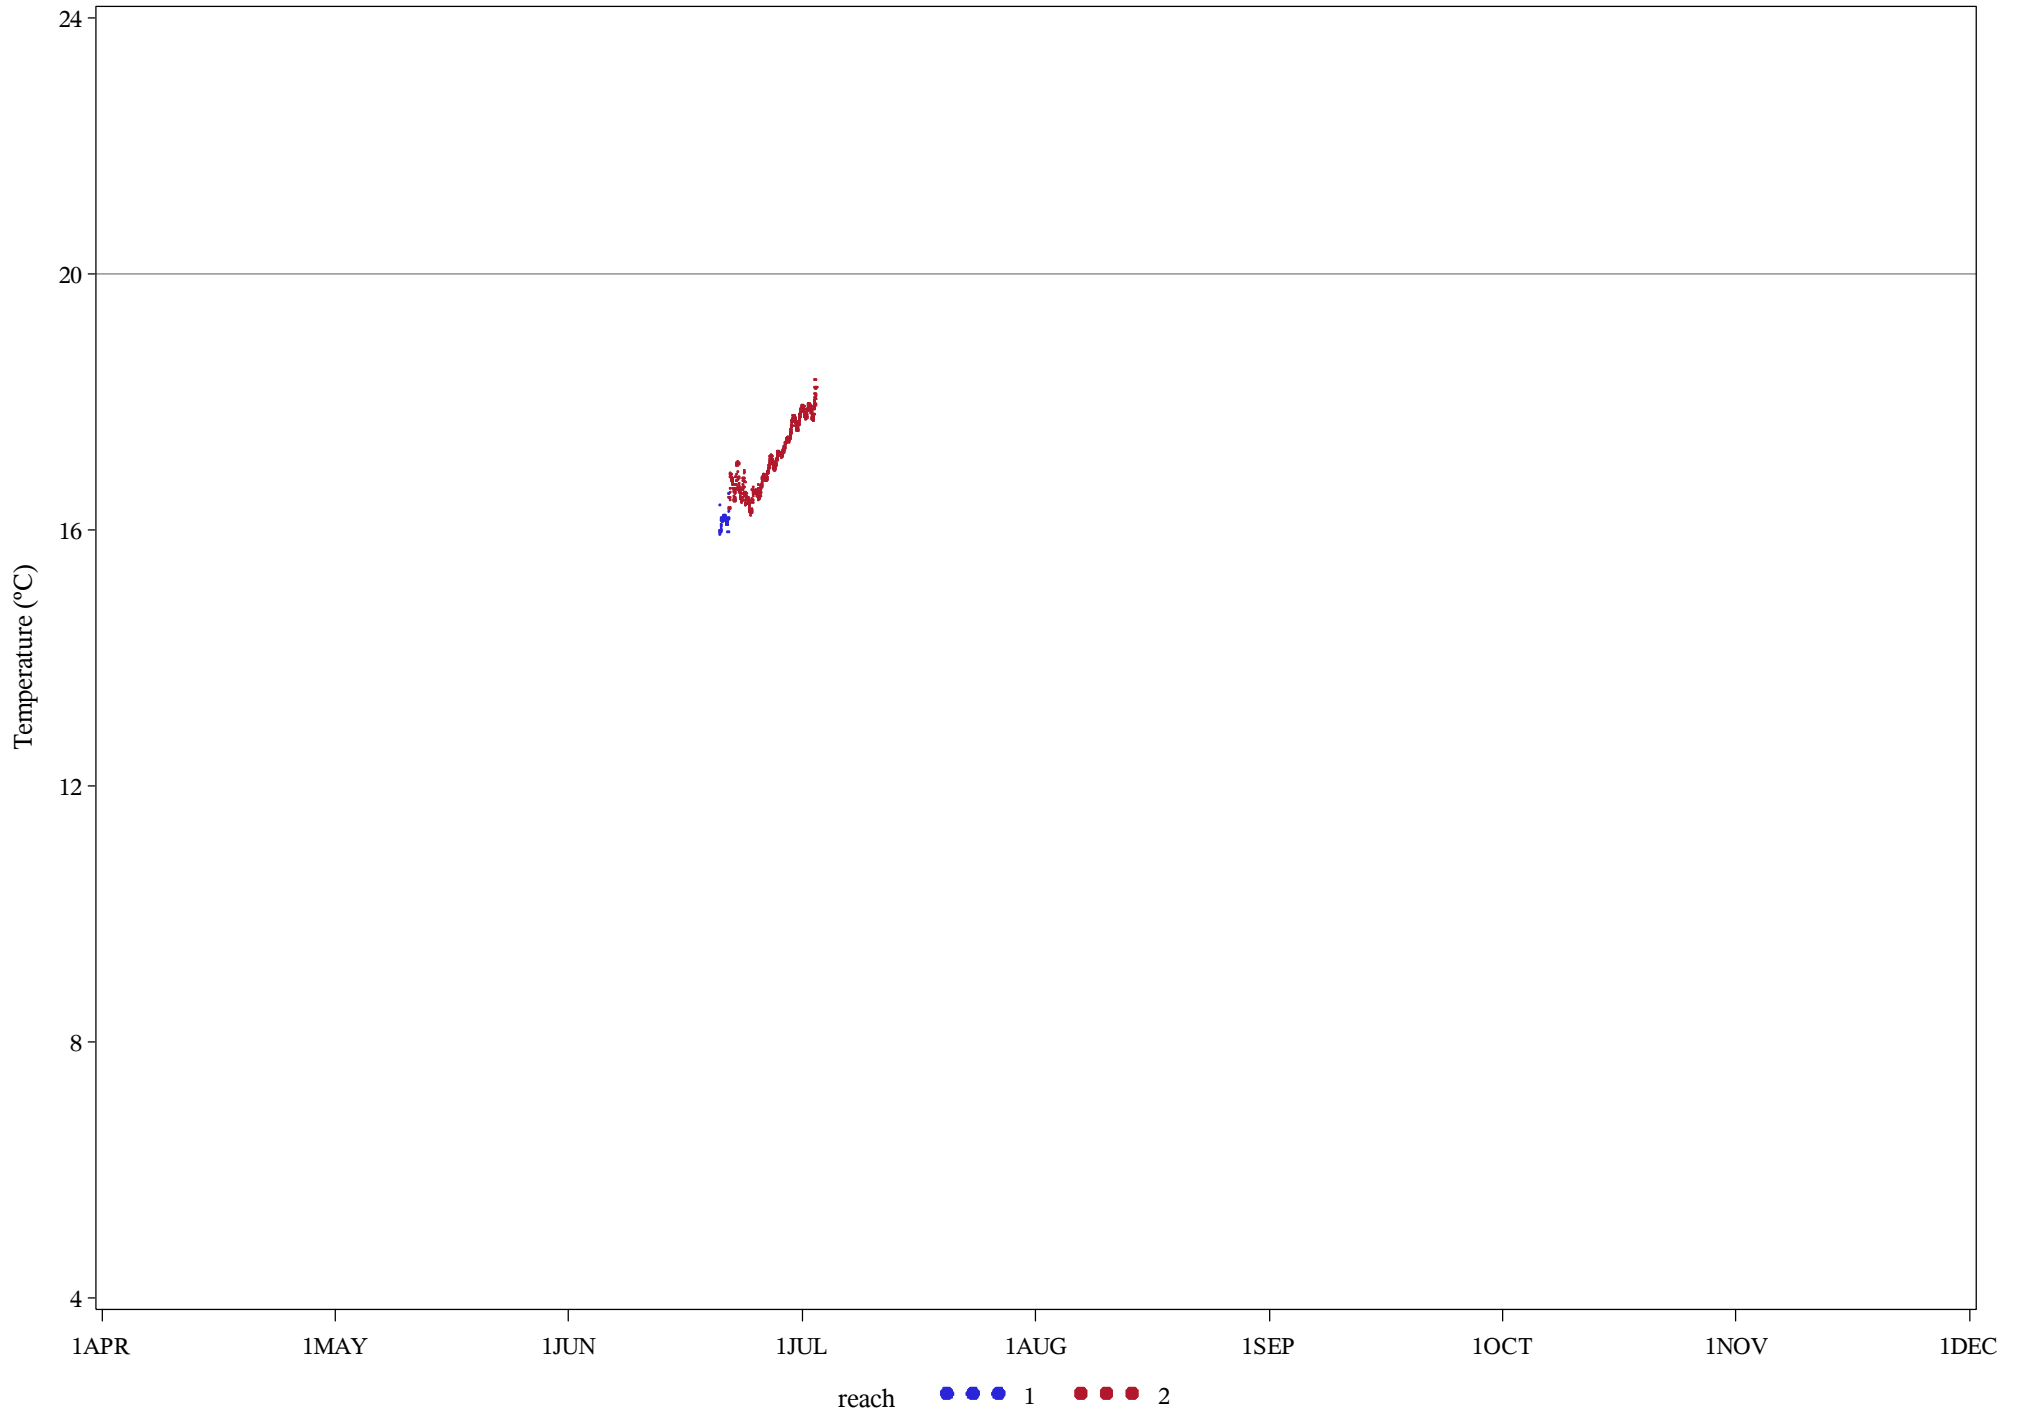

# Steelhead 4768B

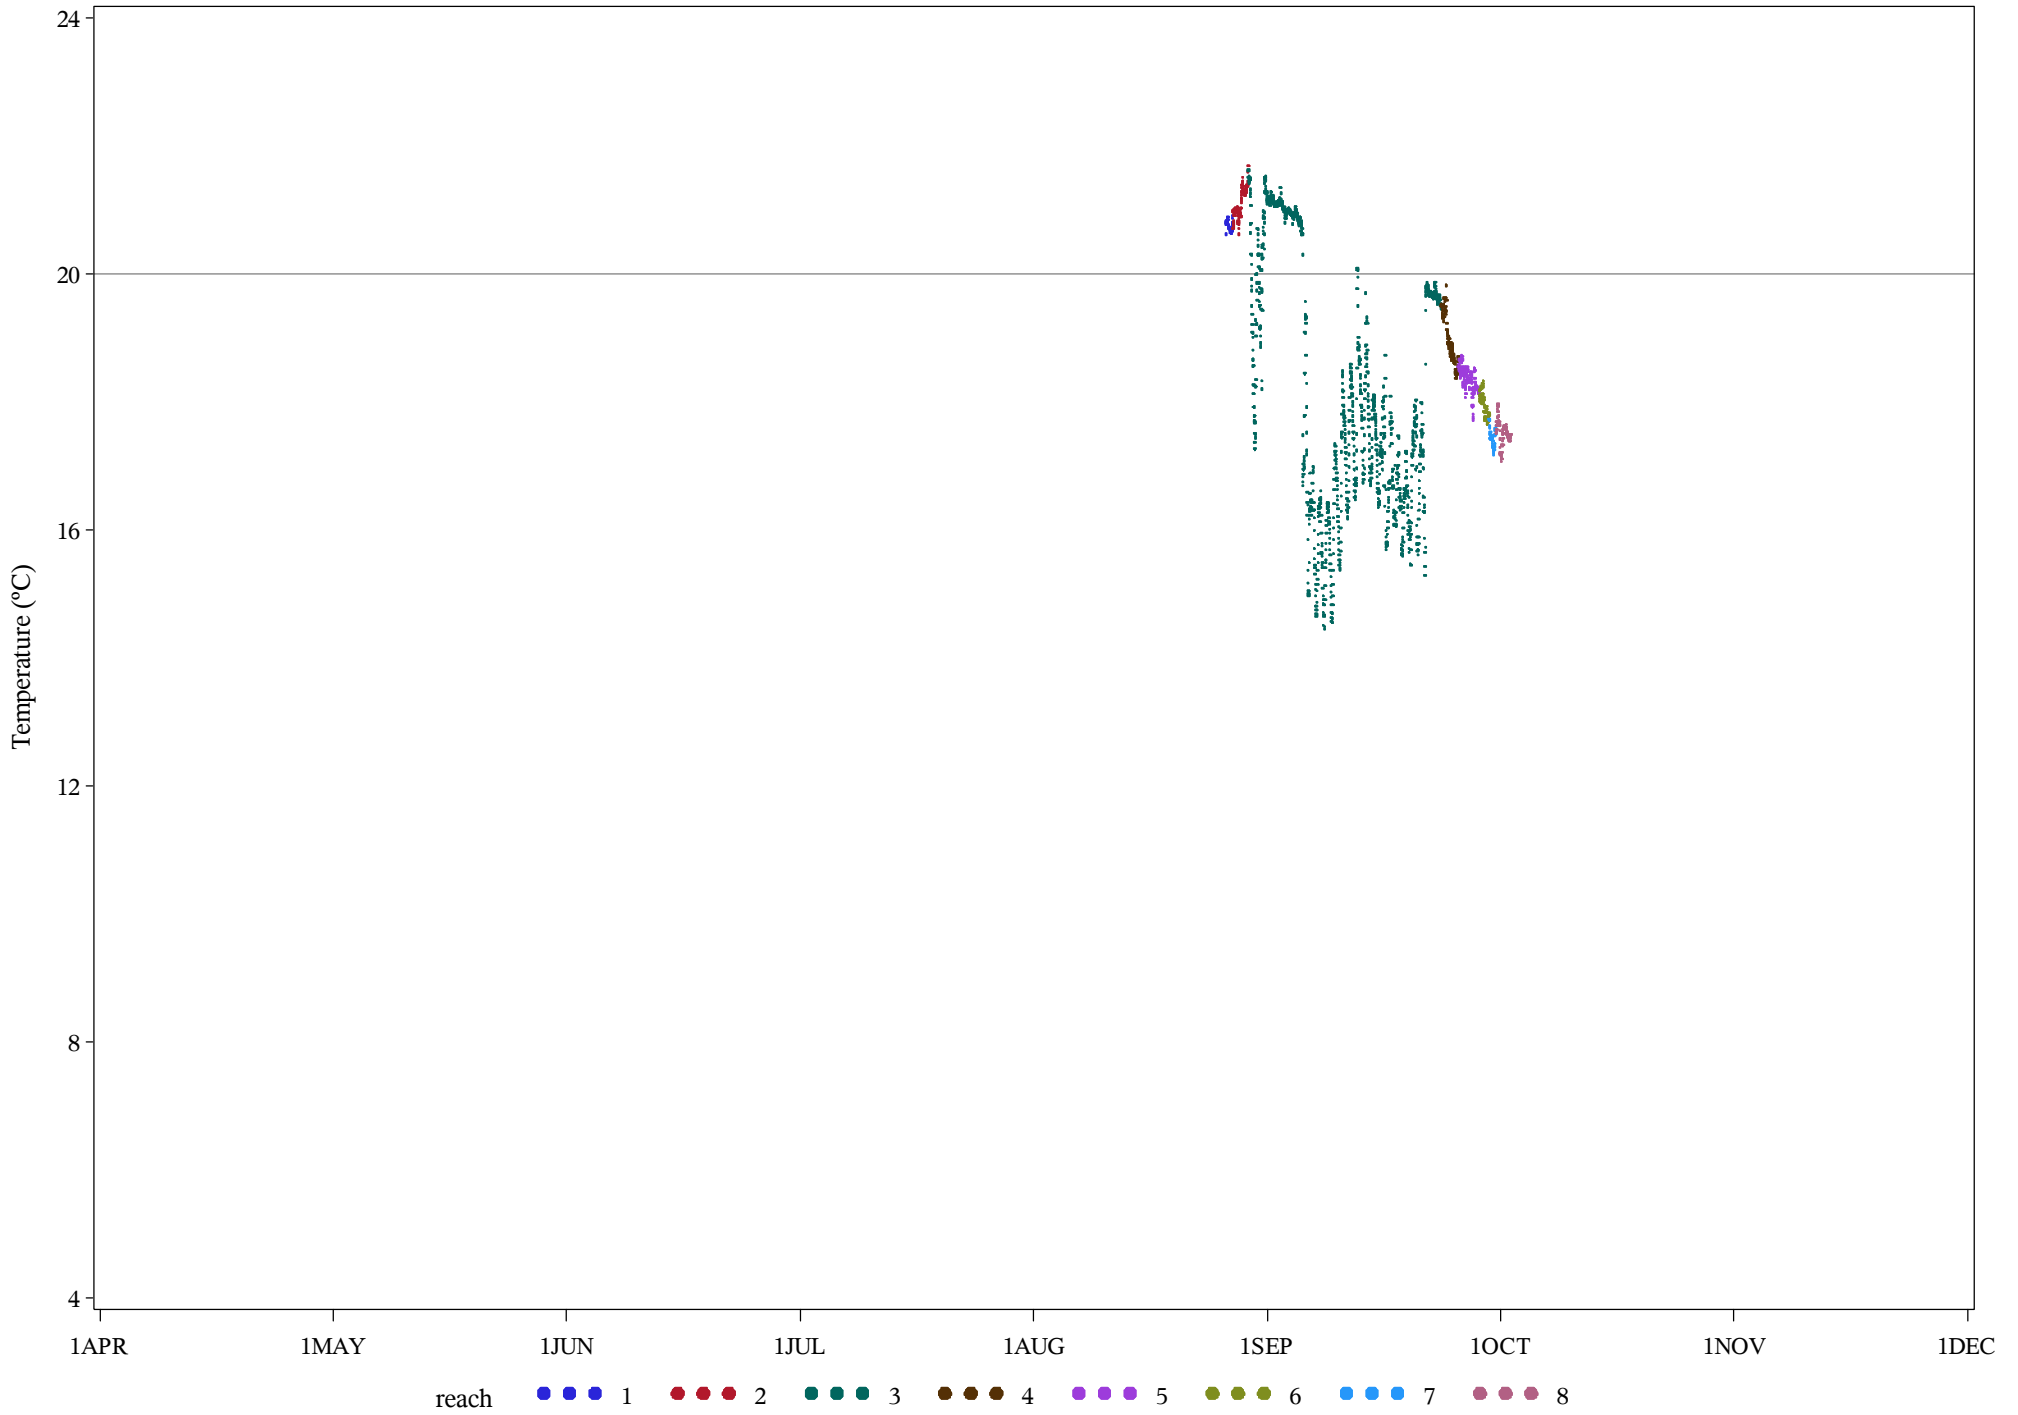



# Steelhead 4771A

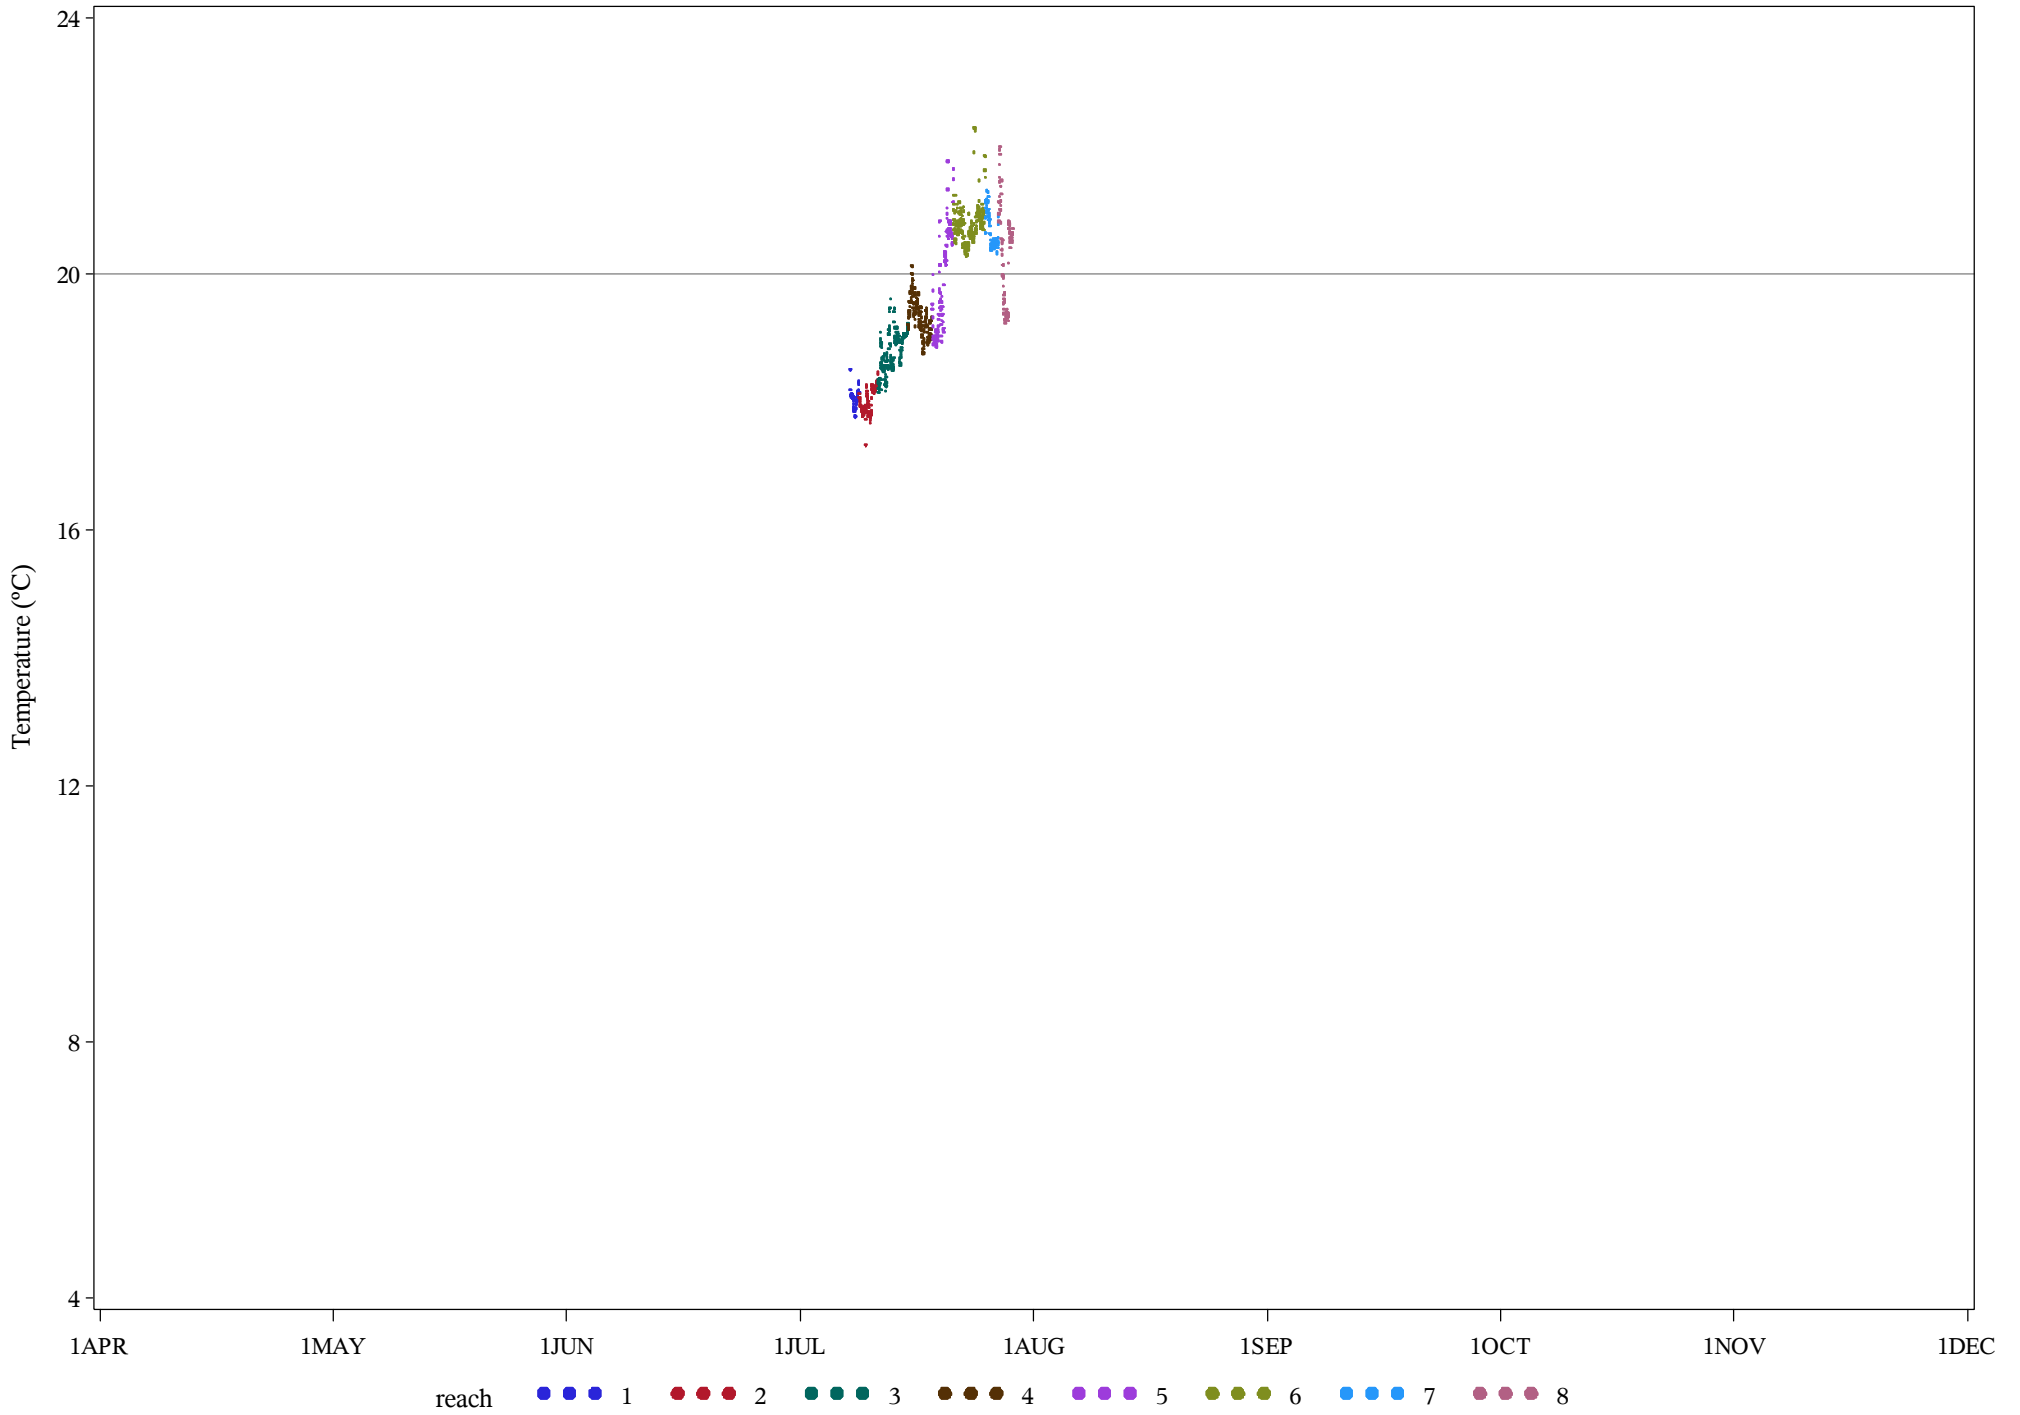

Steelhead  
4777A

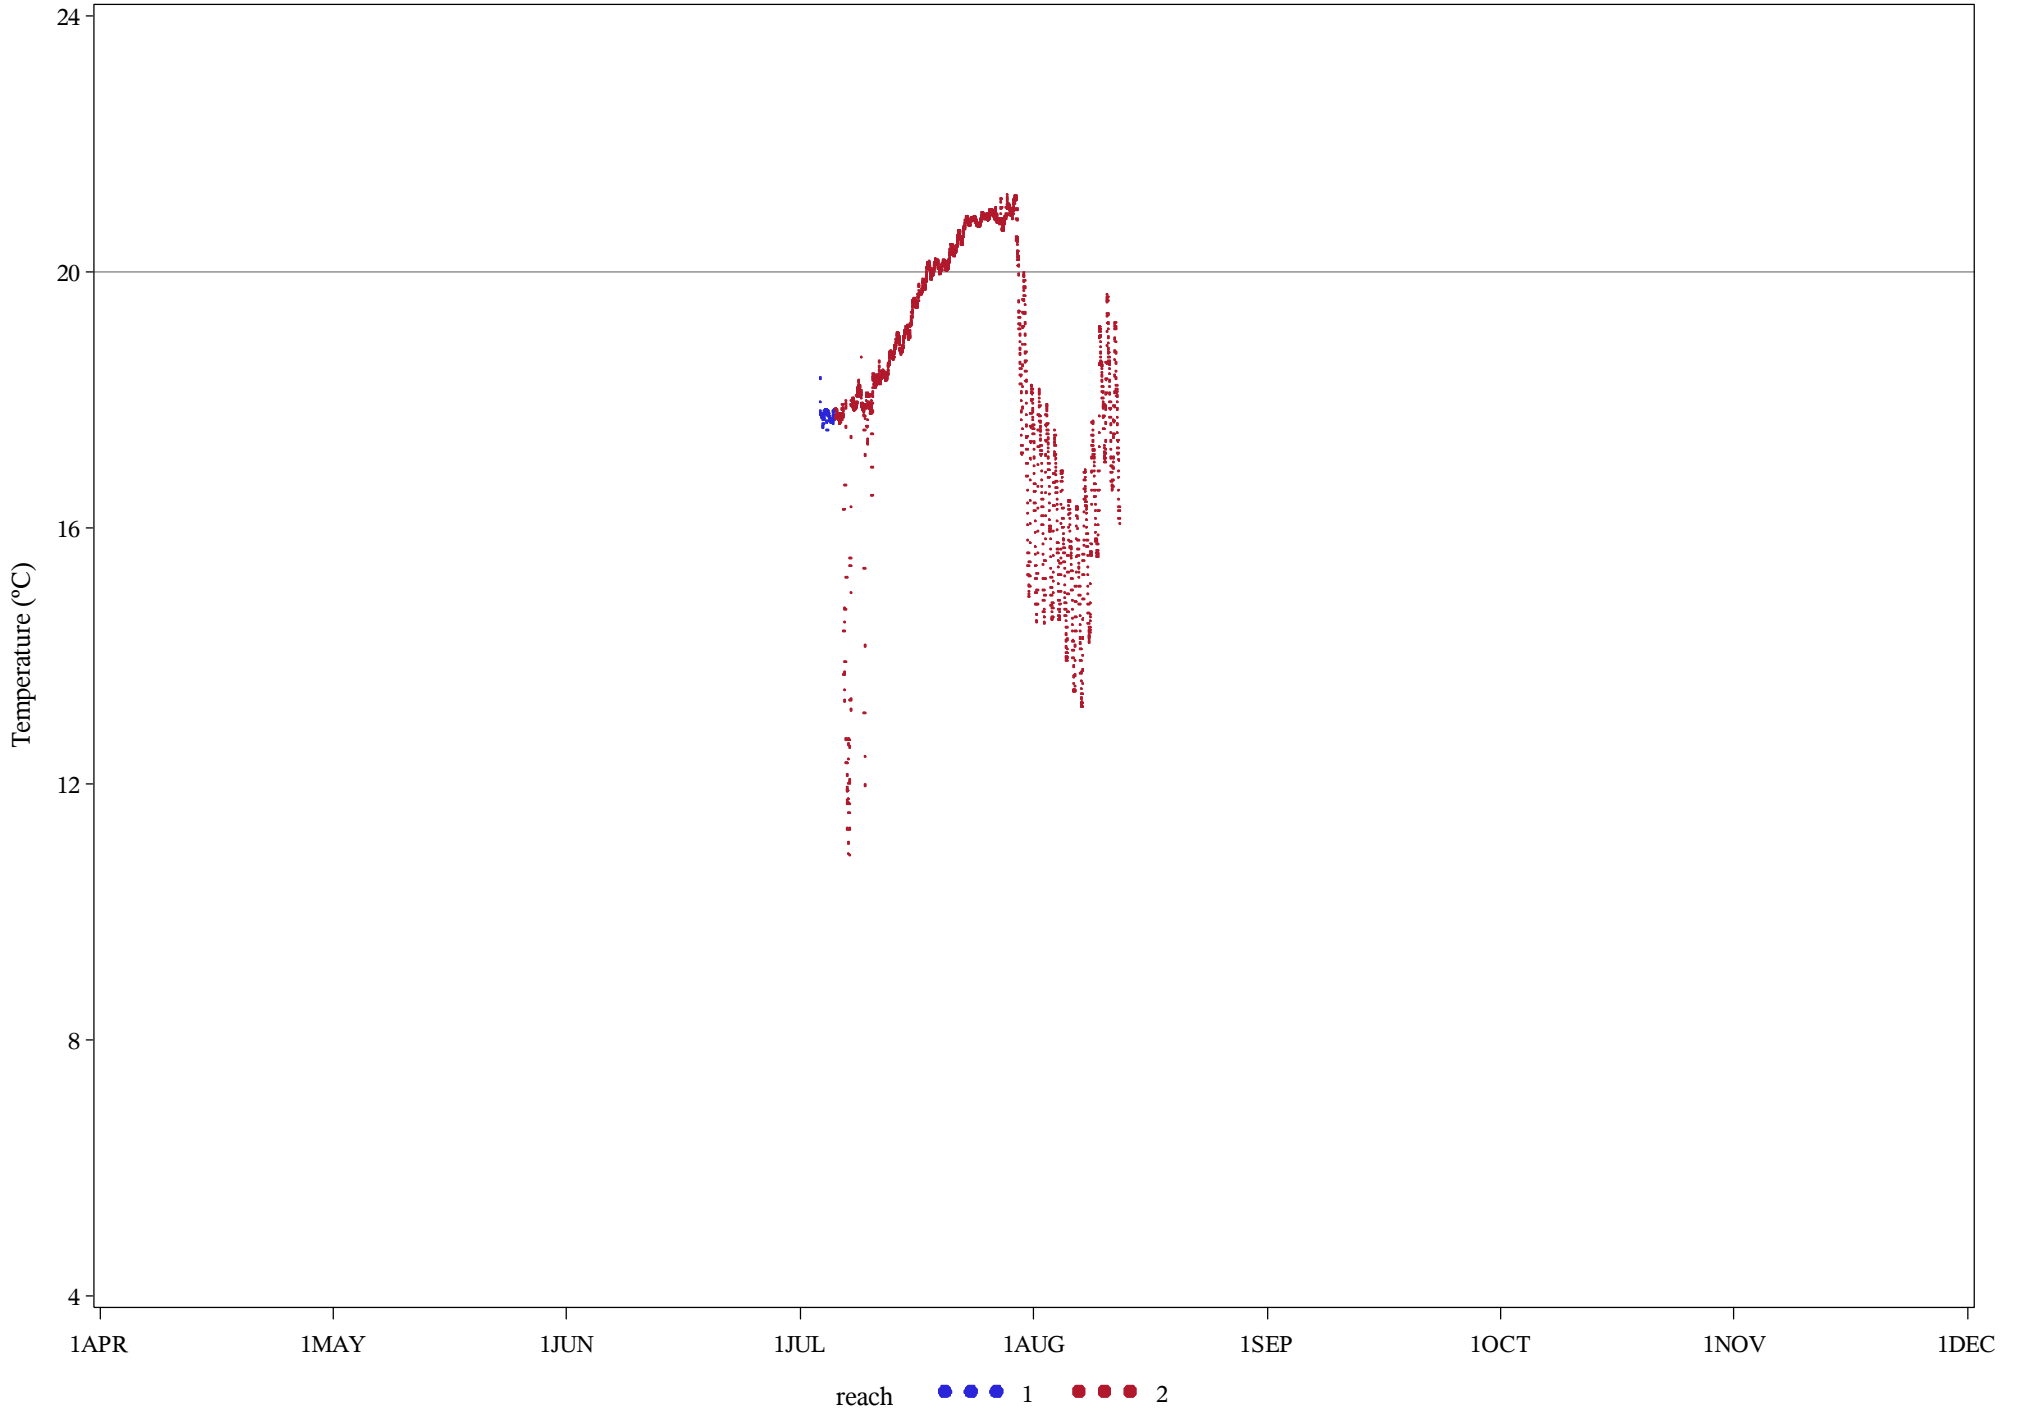

# Steelhead 4777B

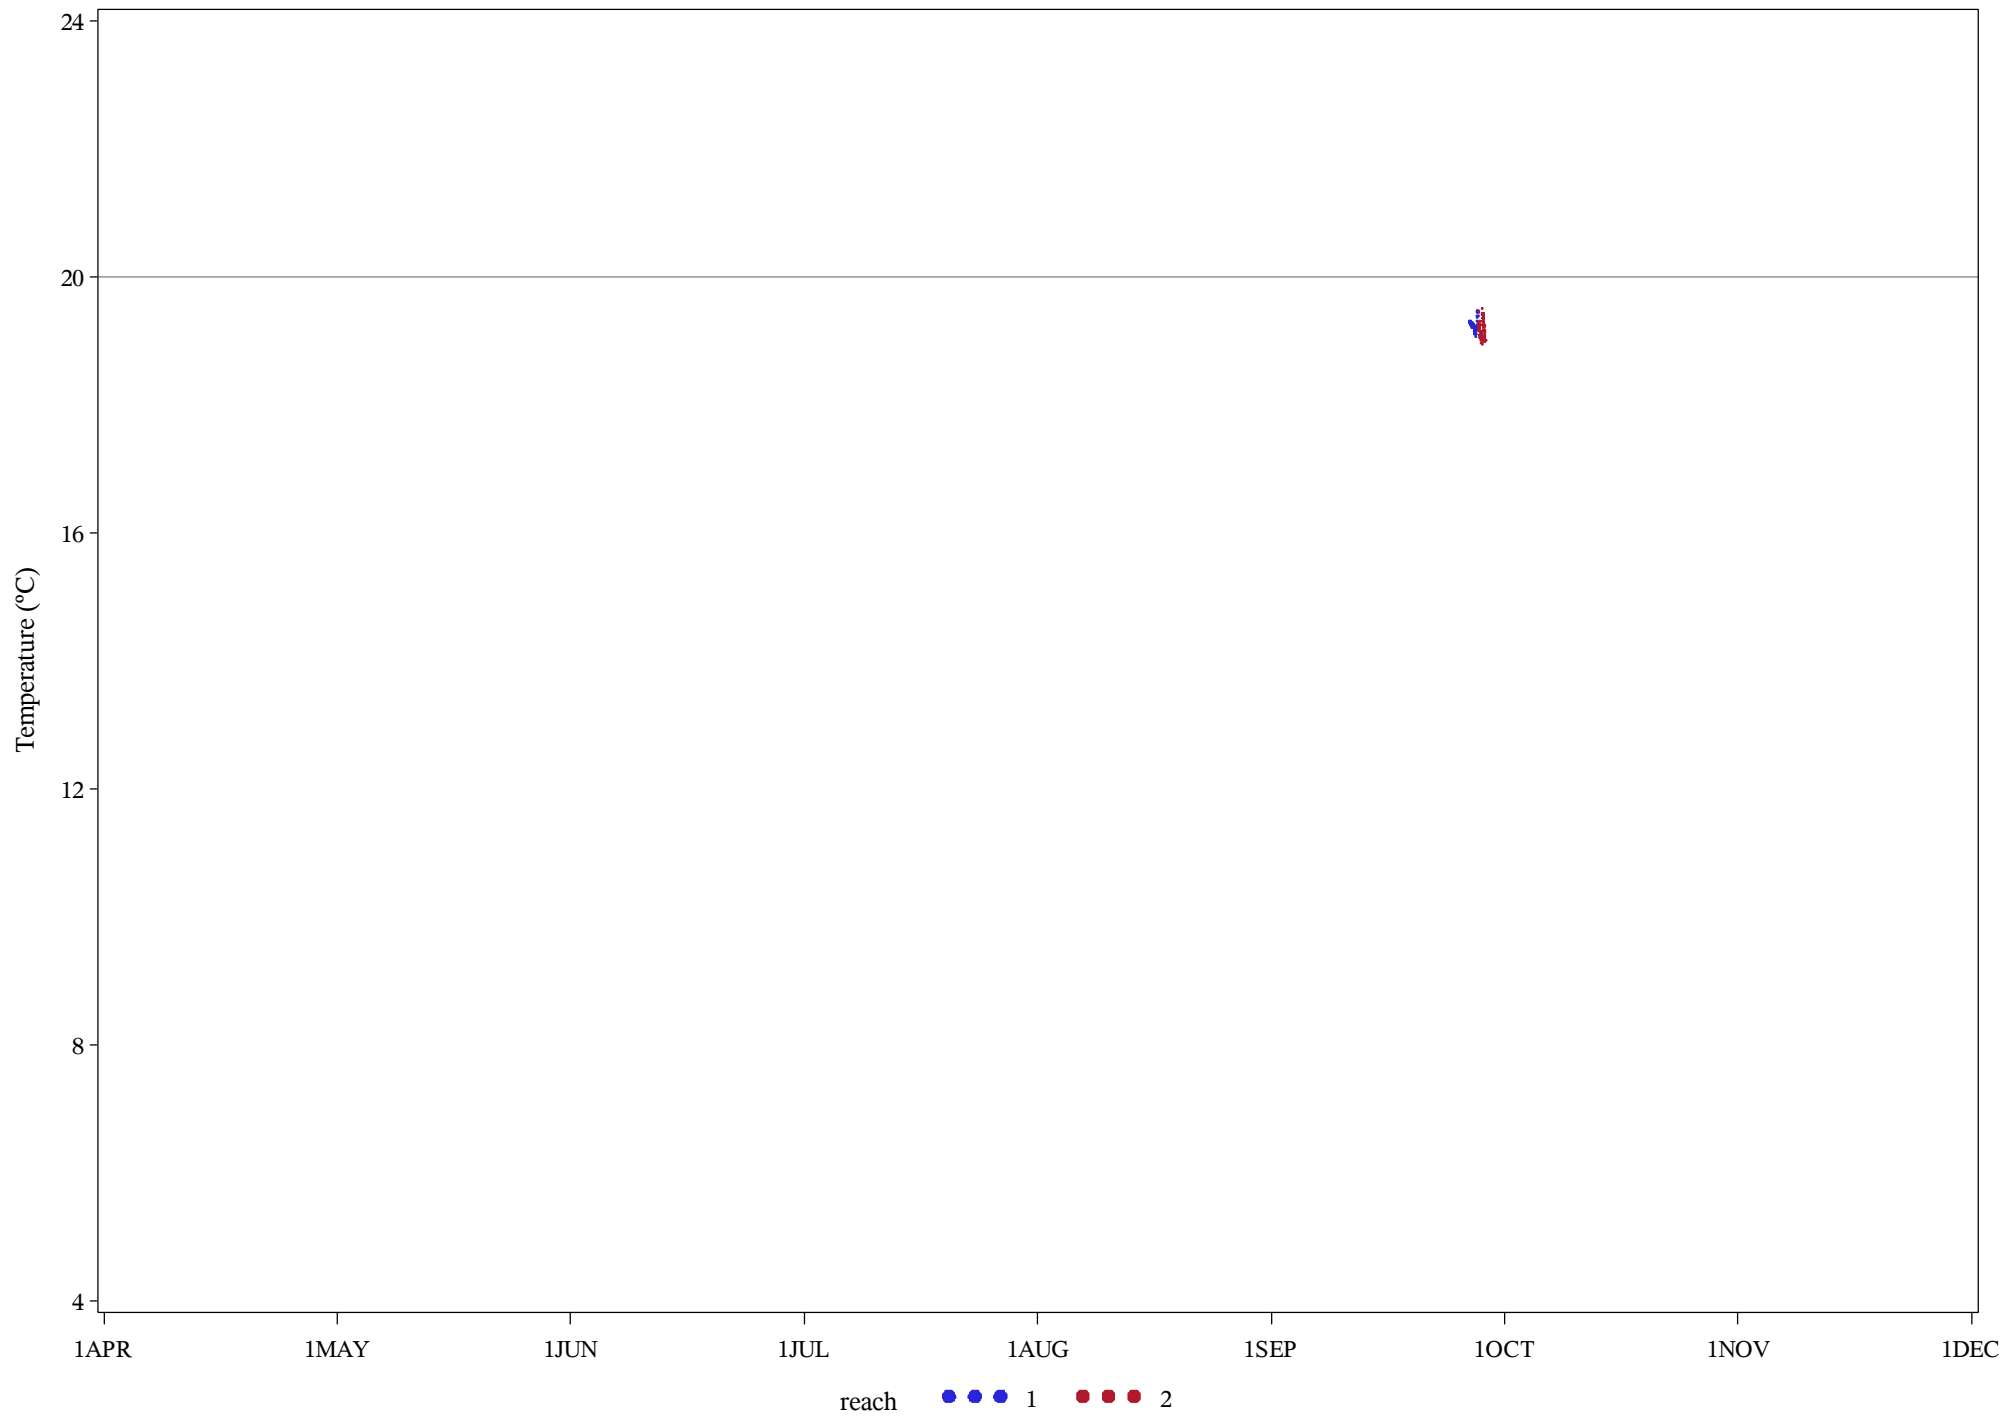

Steelhead  
4778A

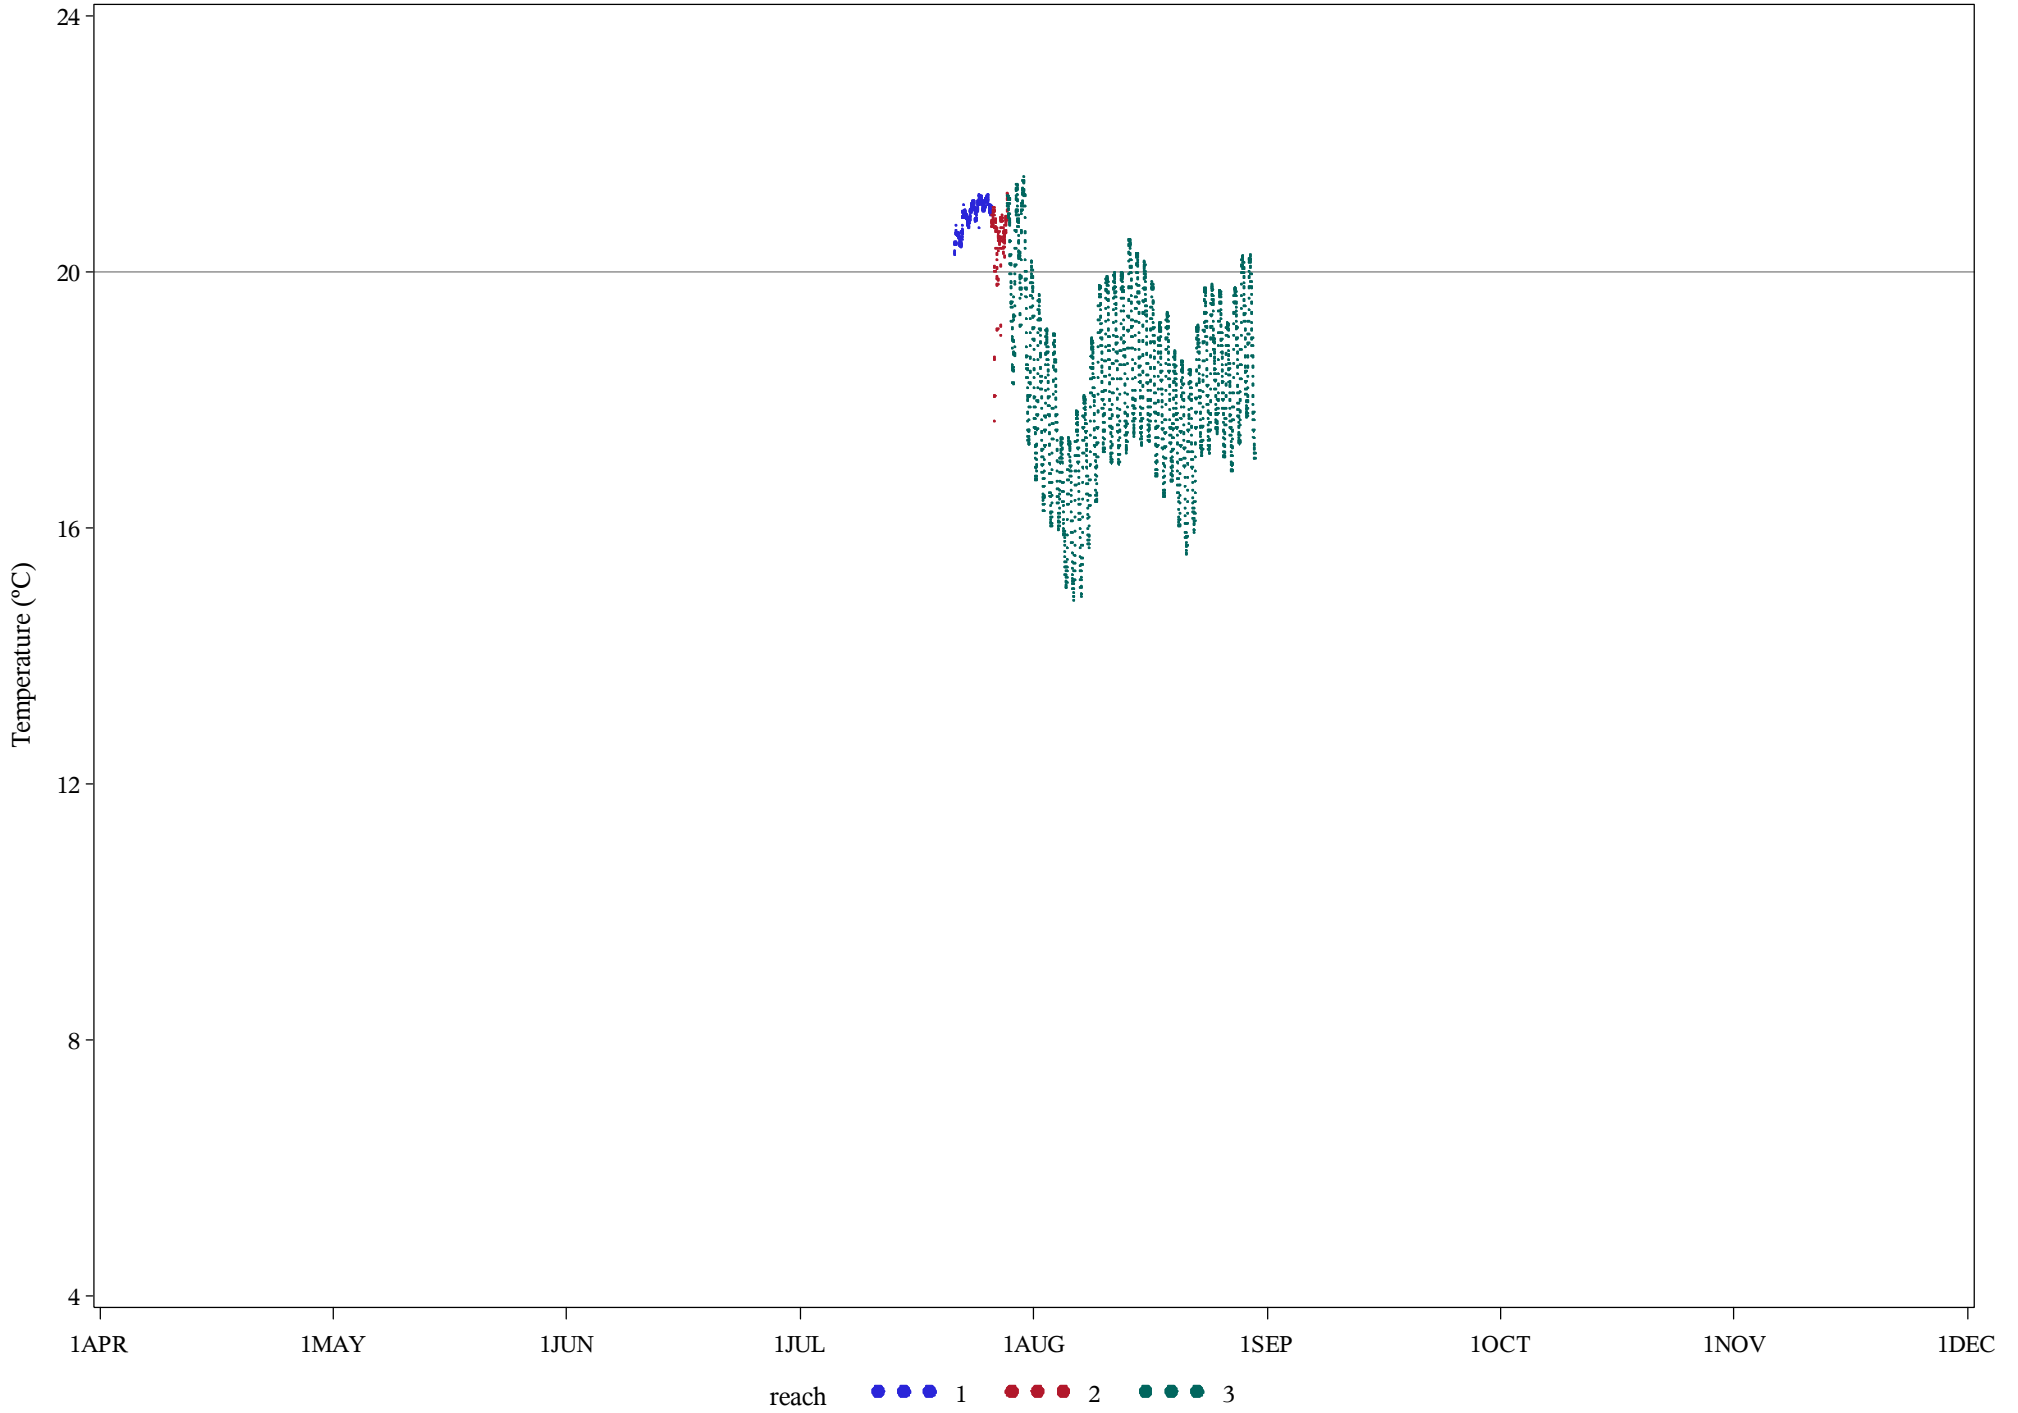

# Steelhead 4783A

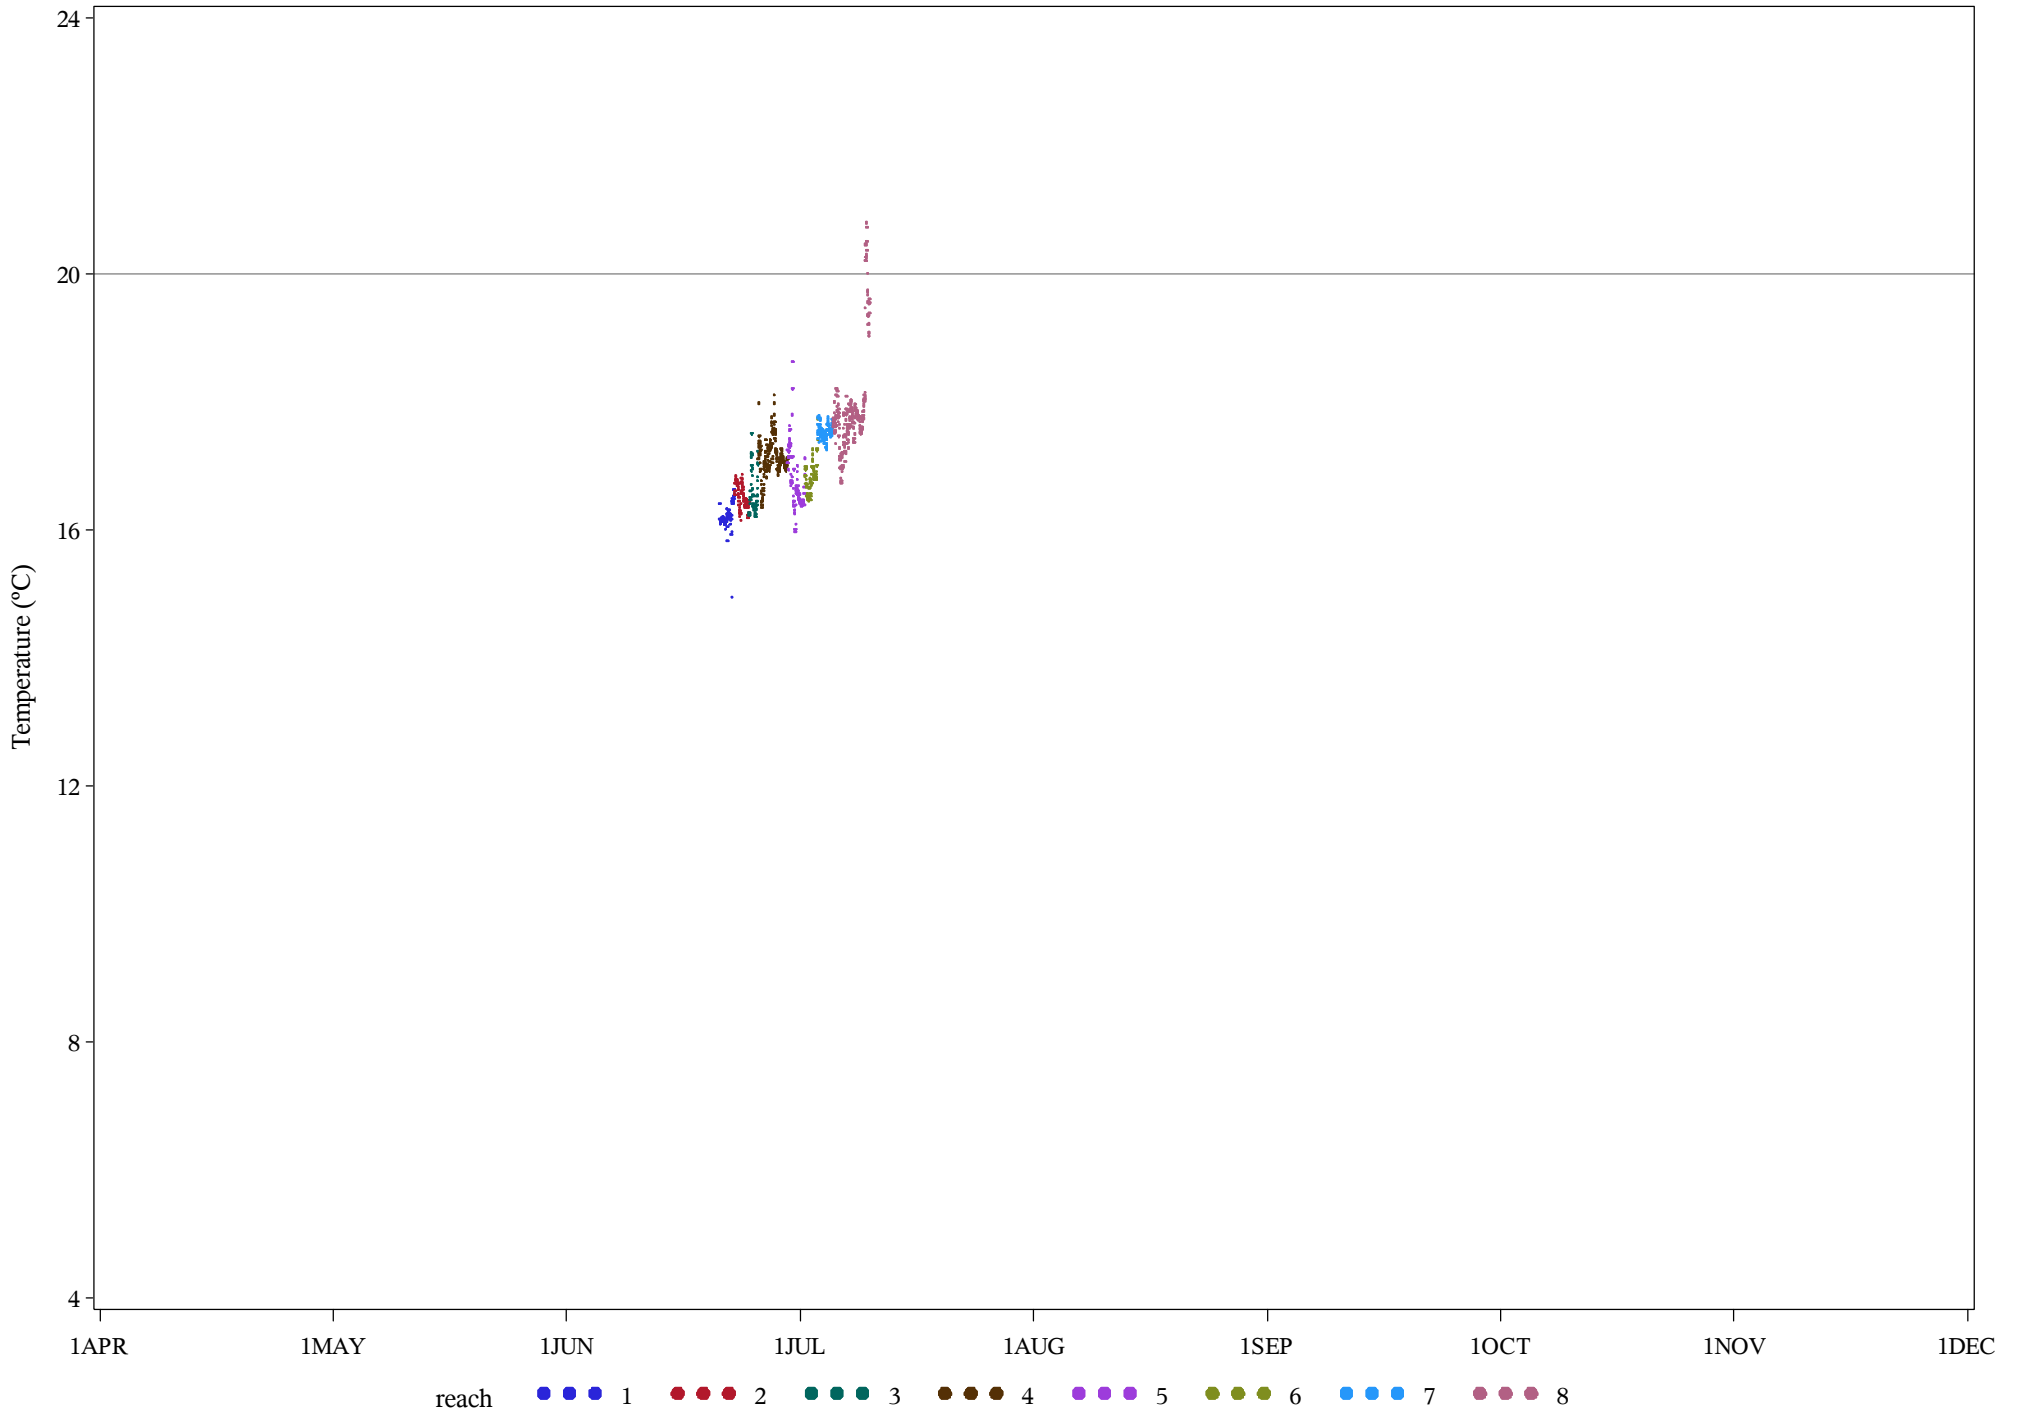

# Steelhead 4783B

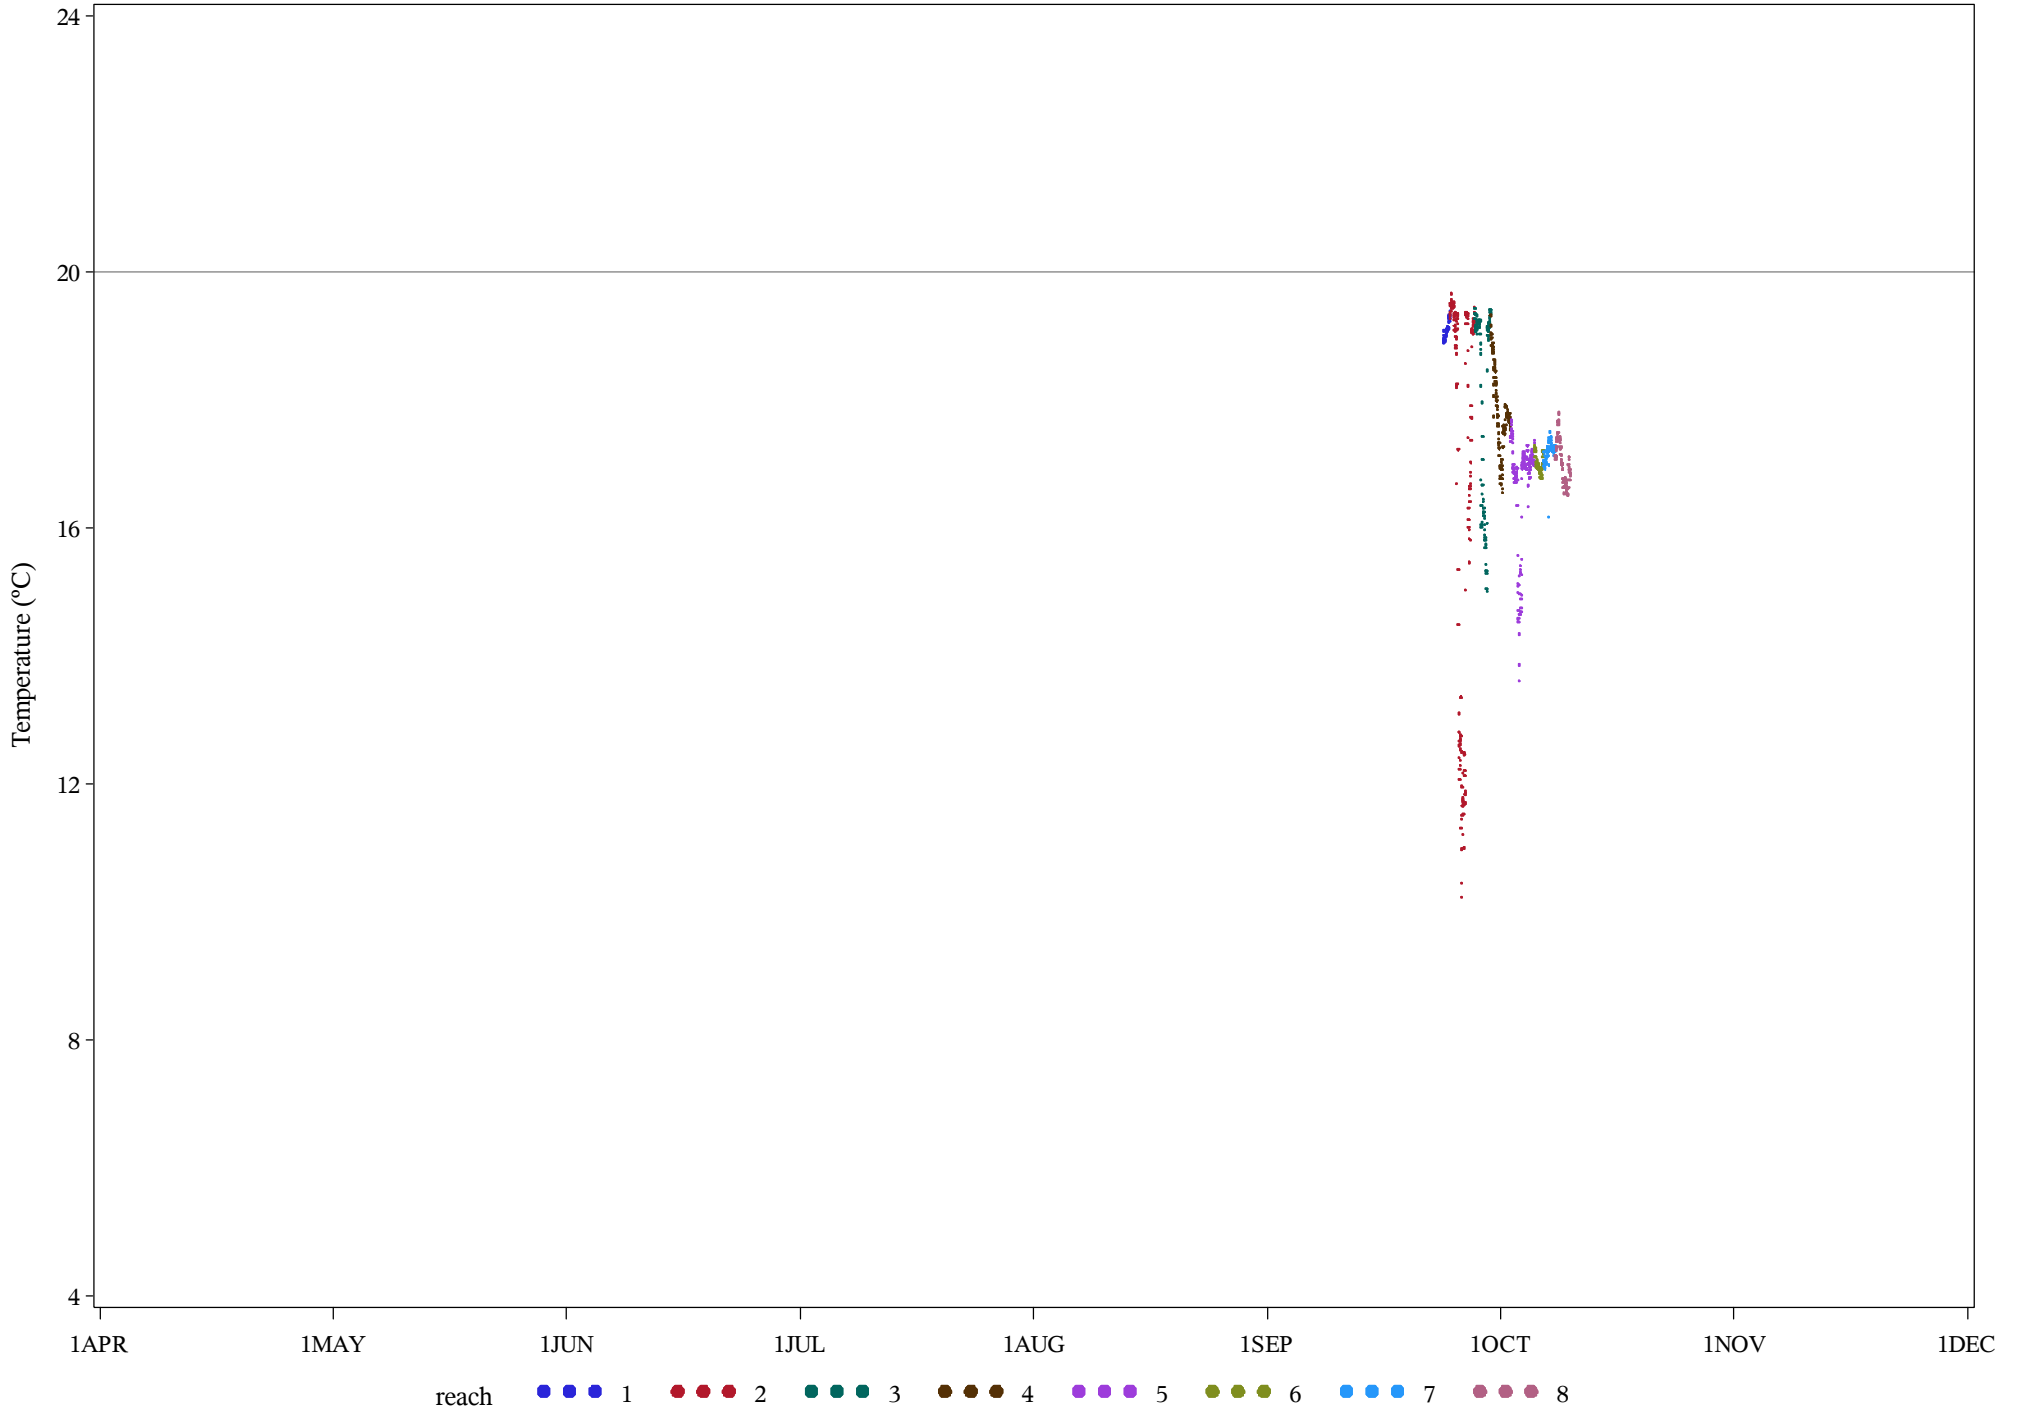

Steelhead  
4786B

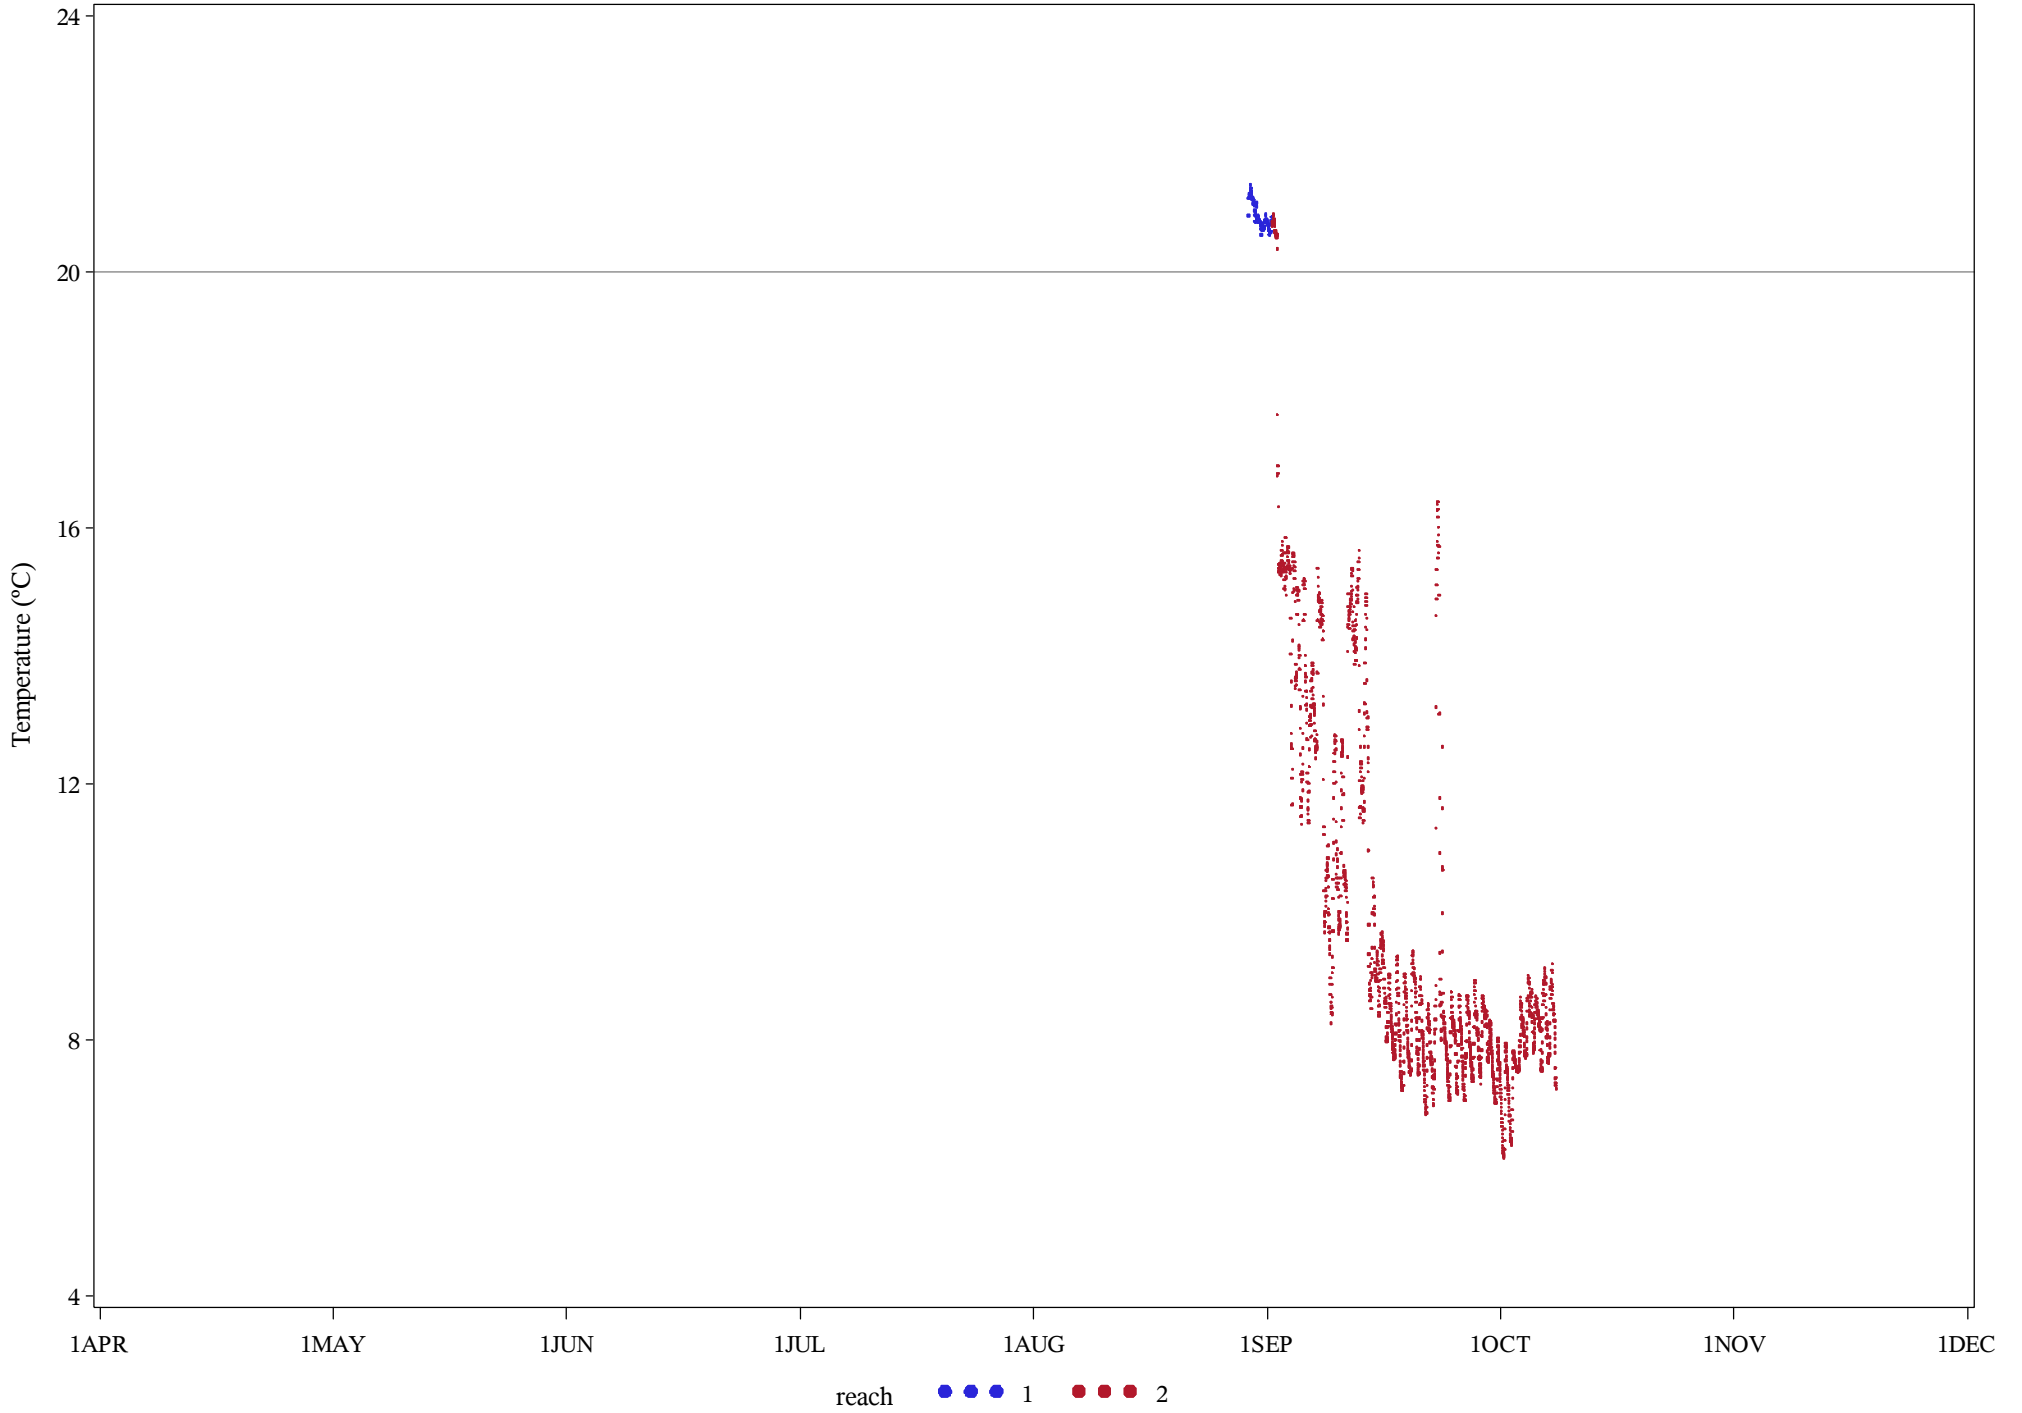

# Steelhead 4787A

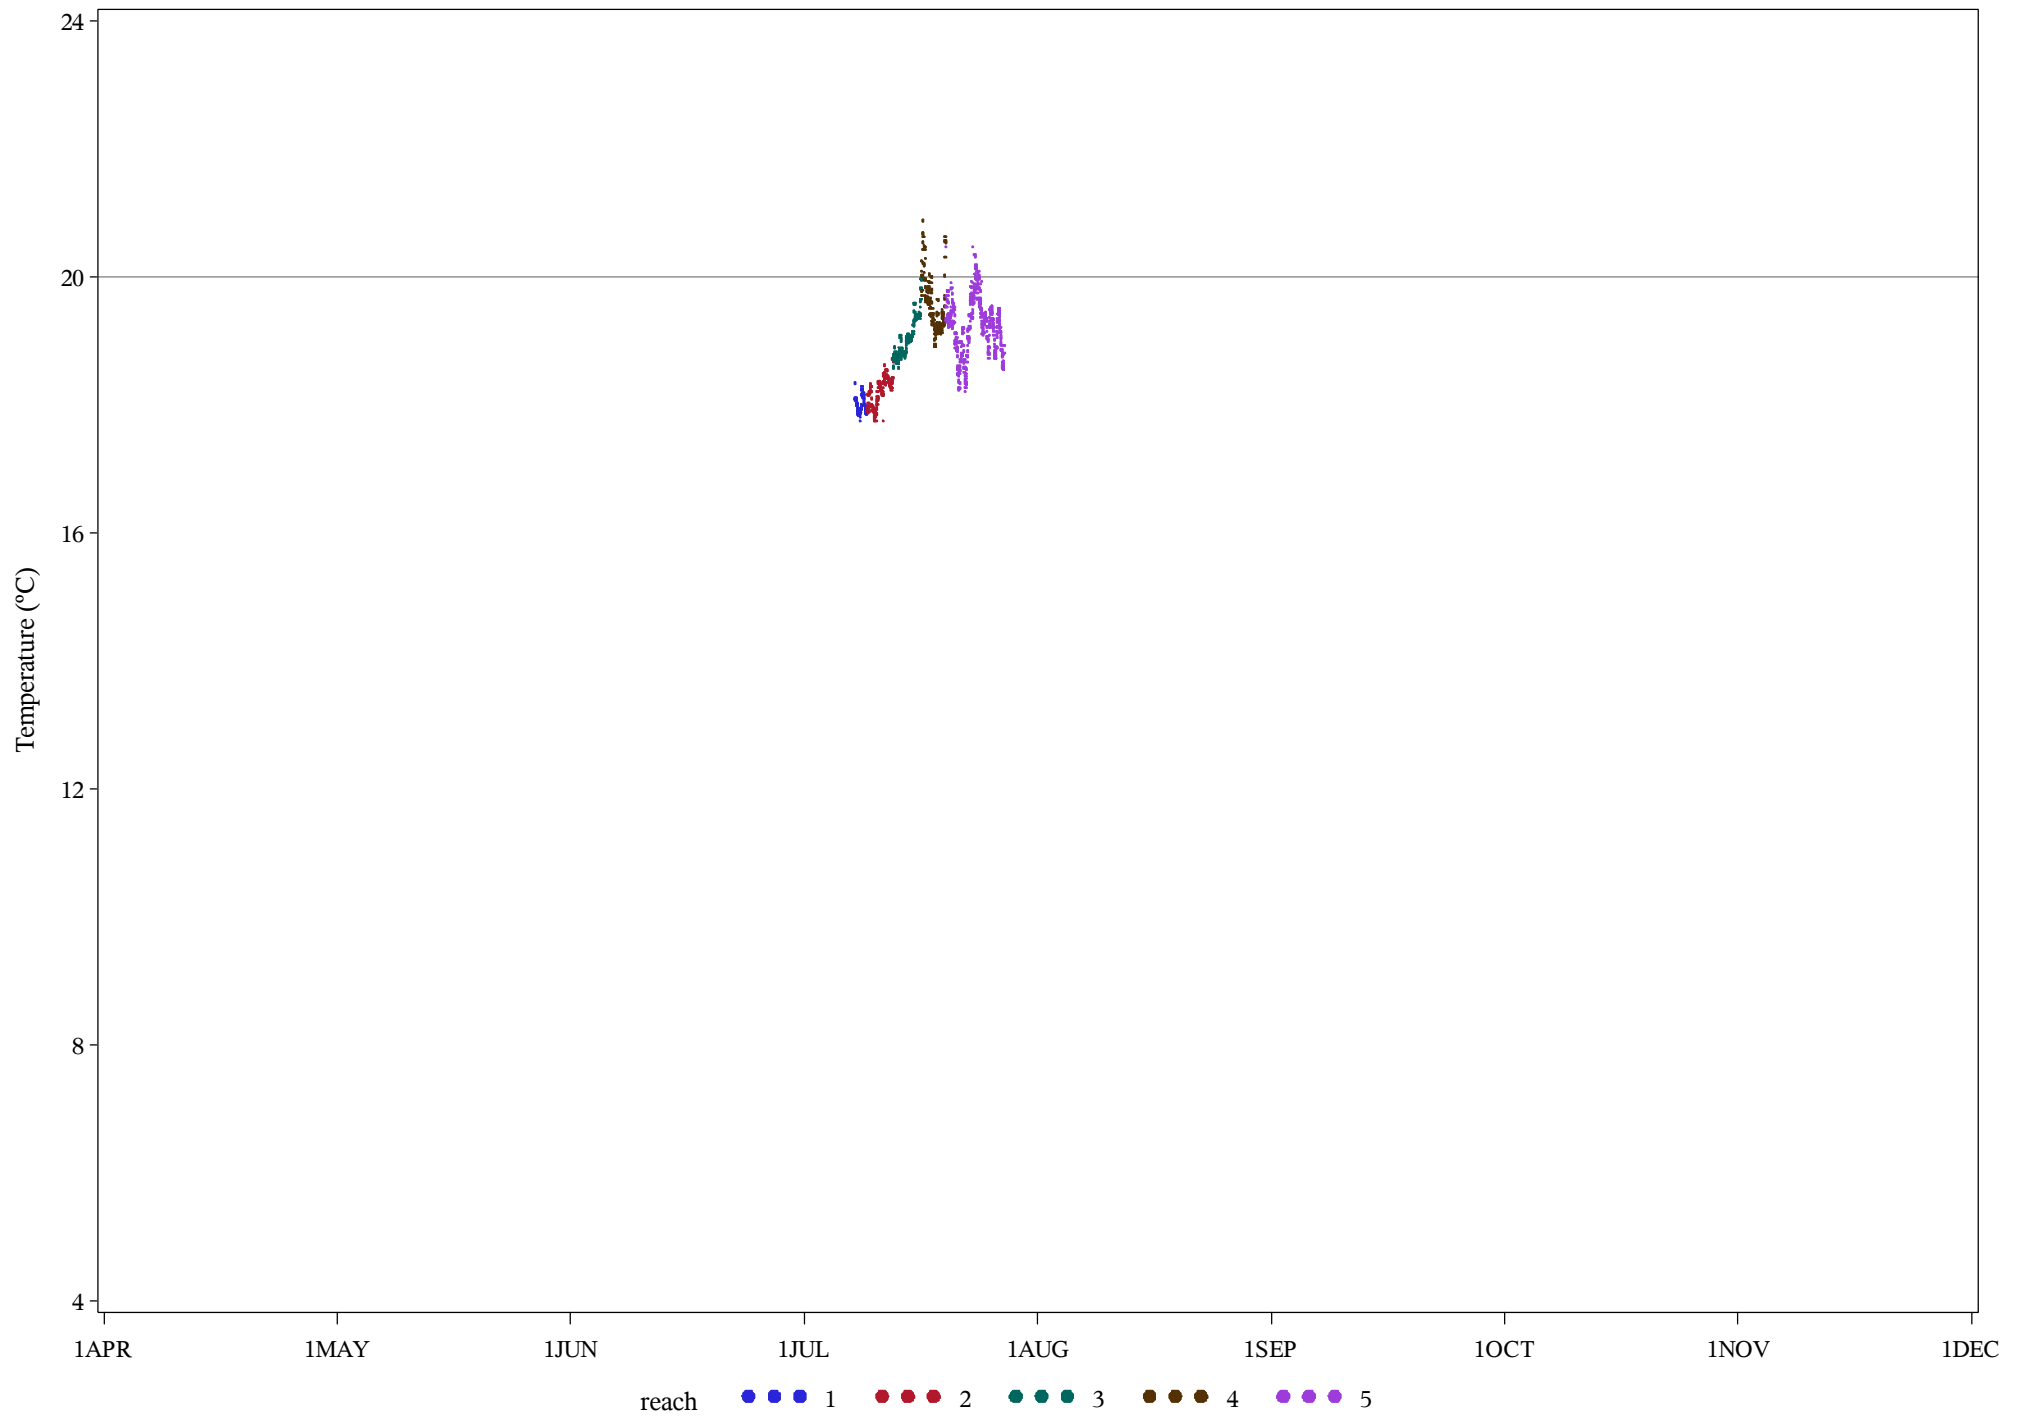



# Steelhead 4787B

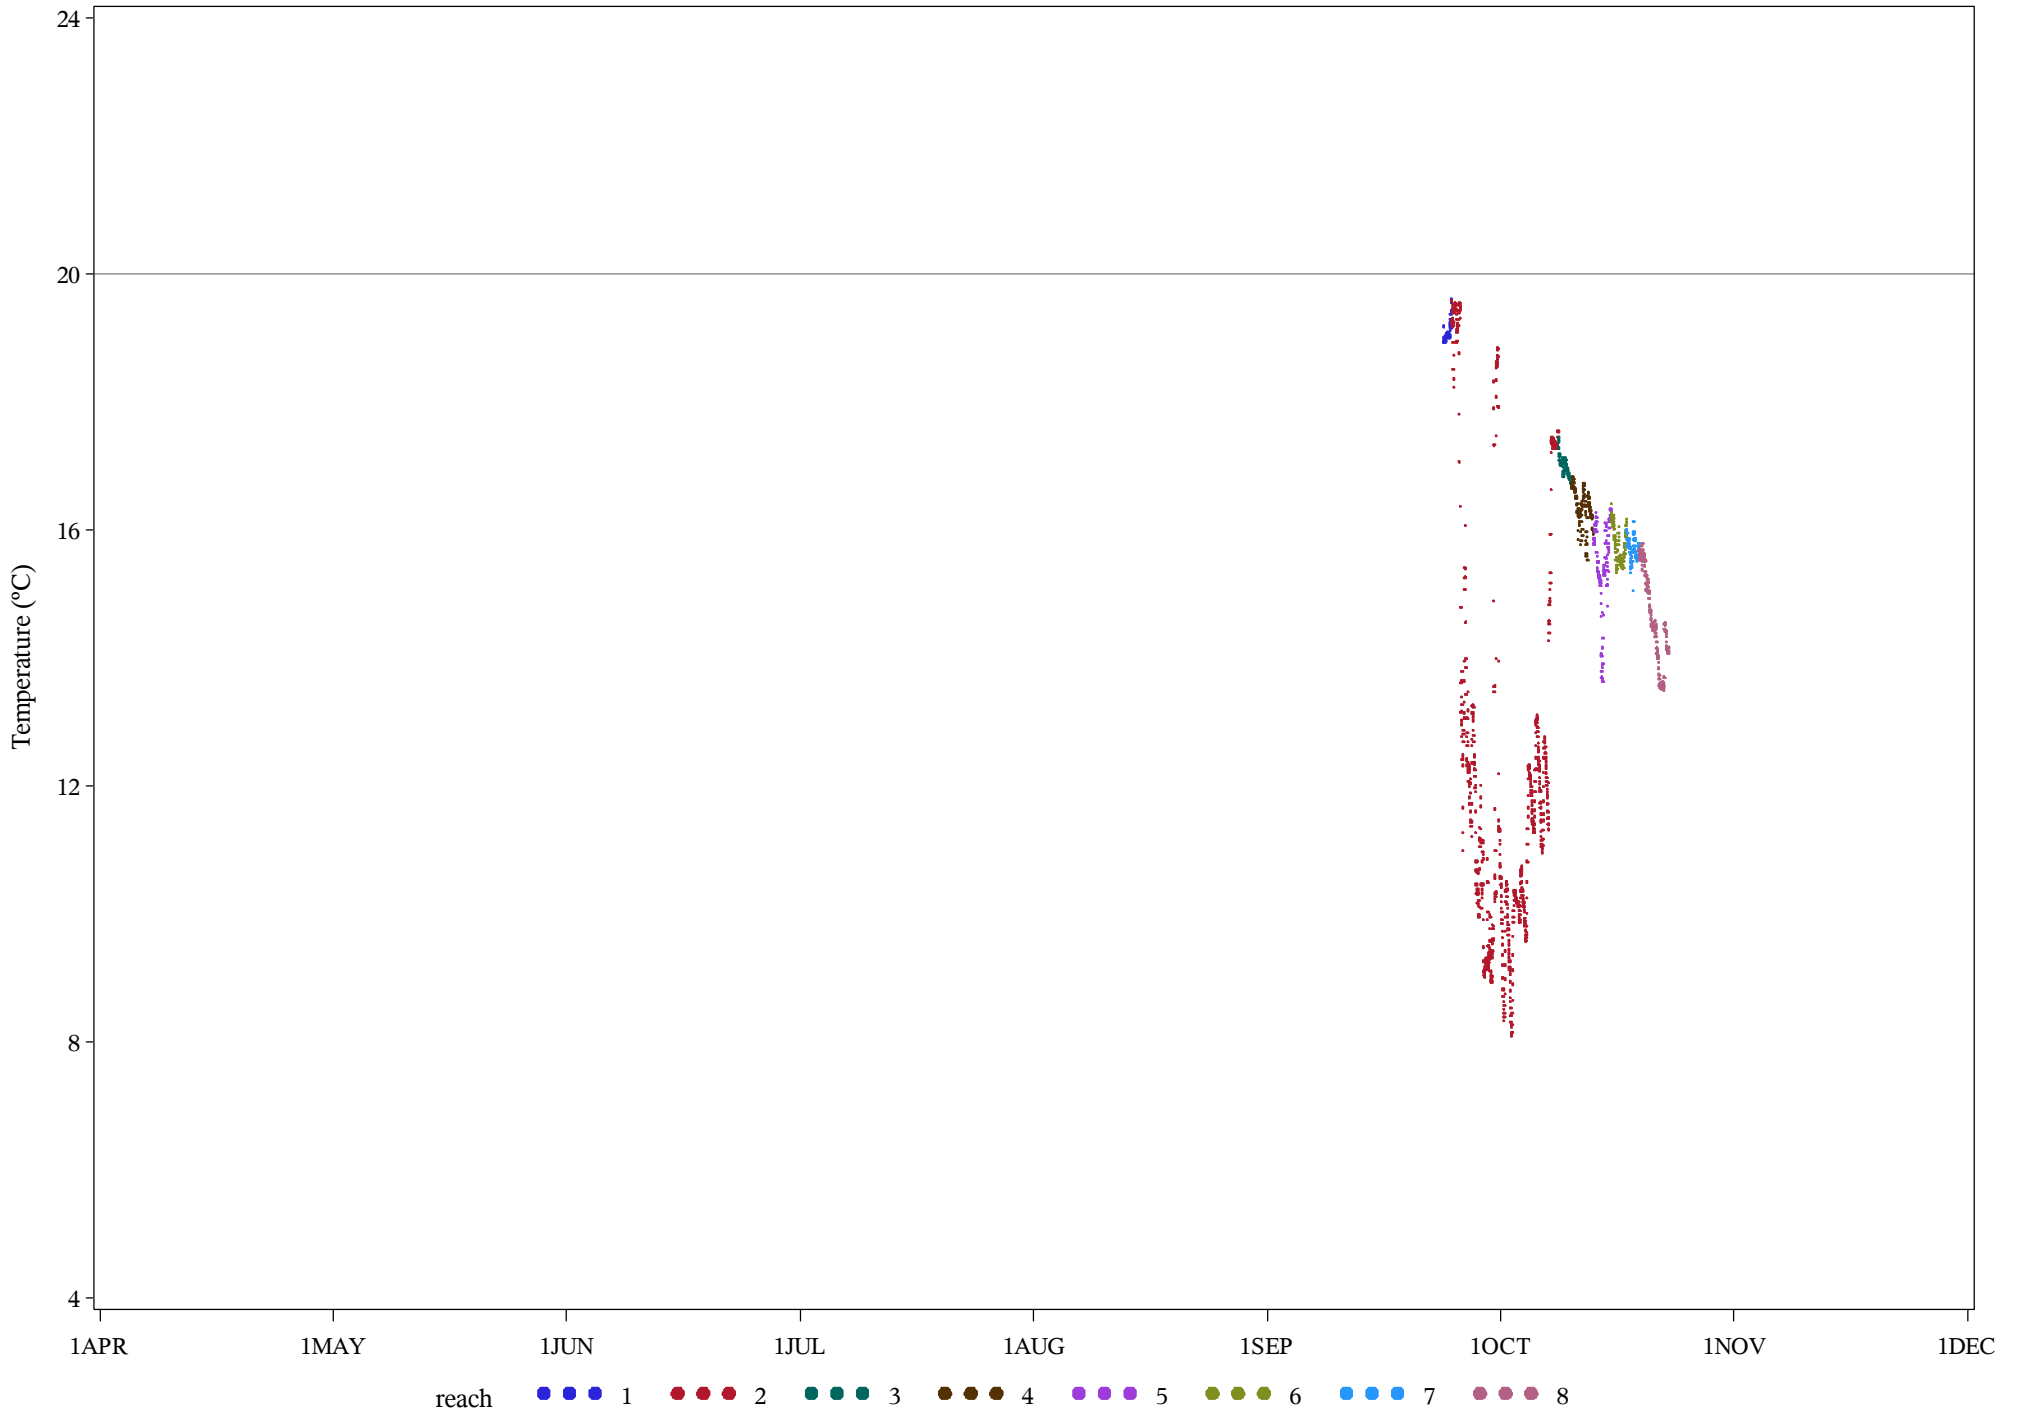

# Steelhead 4791A

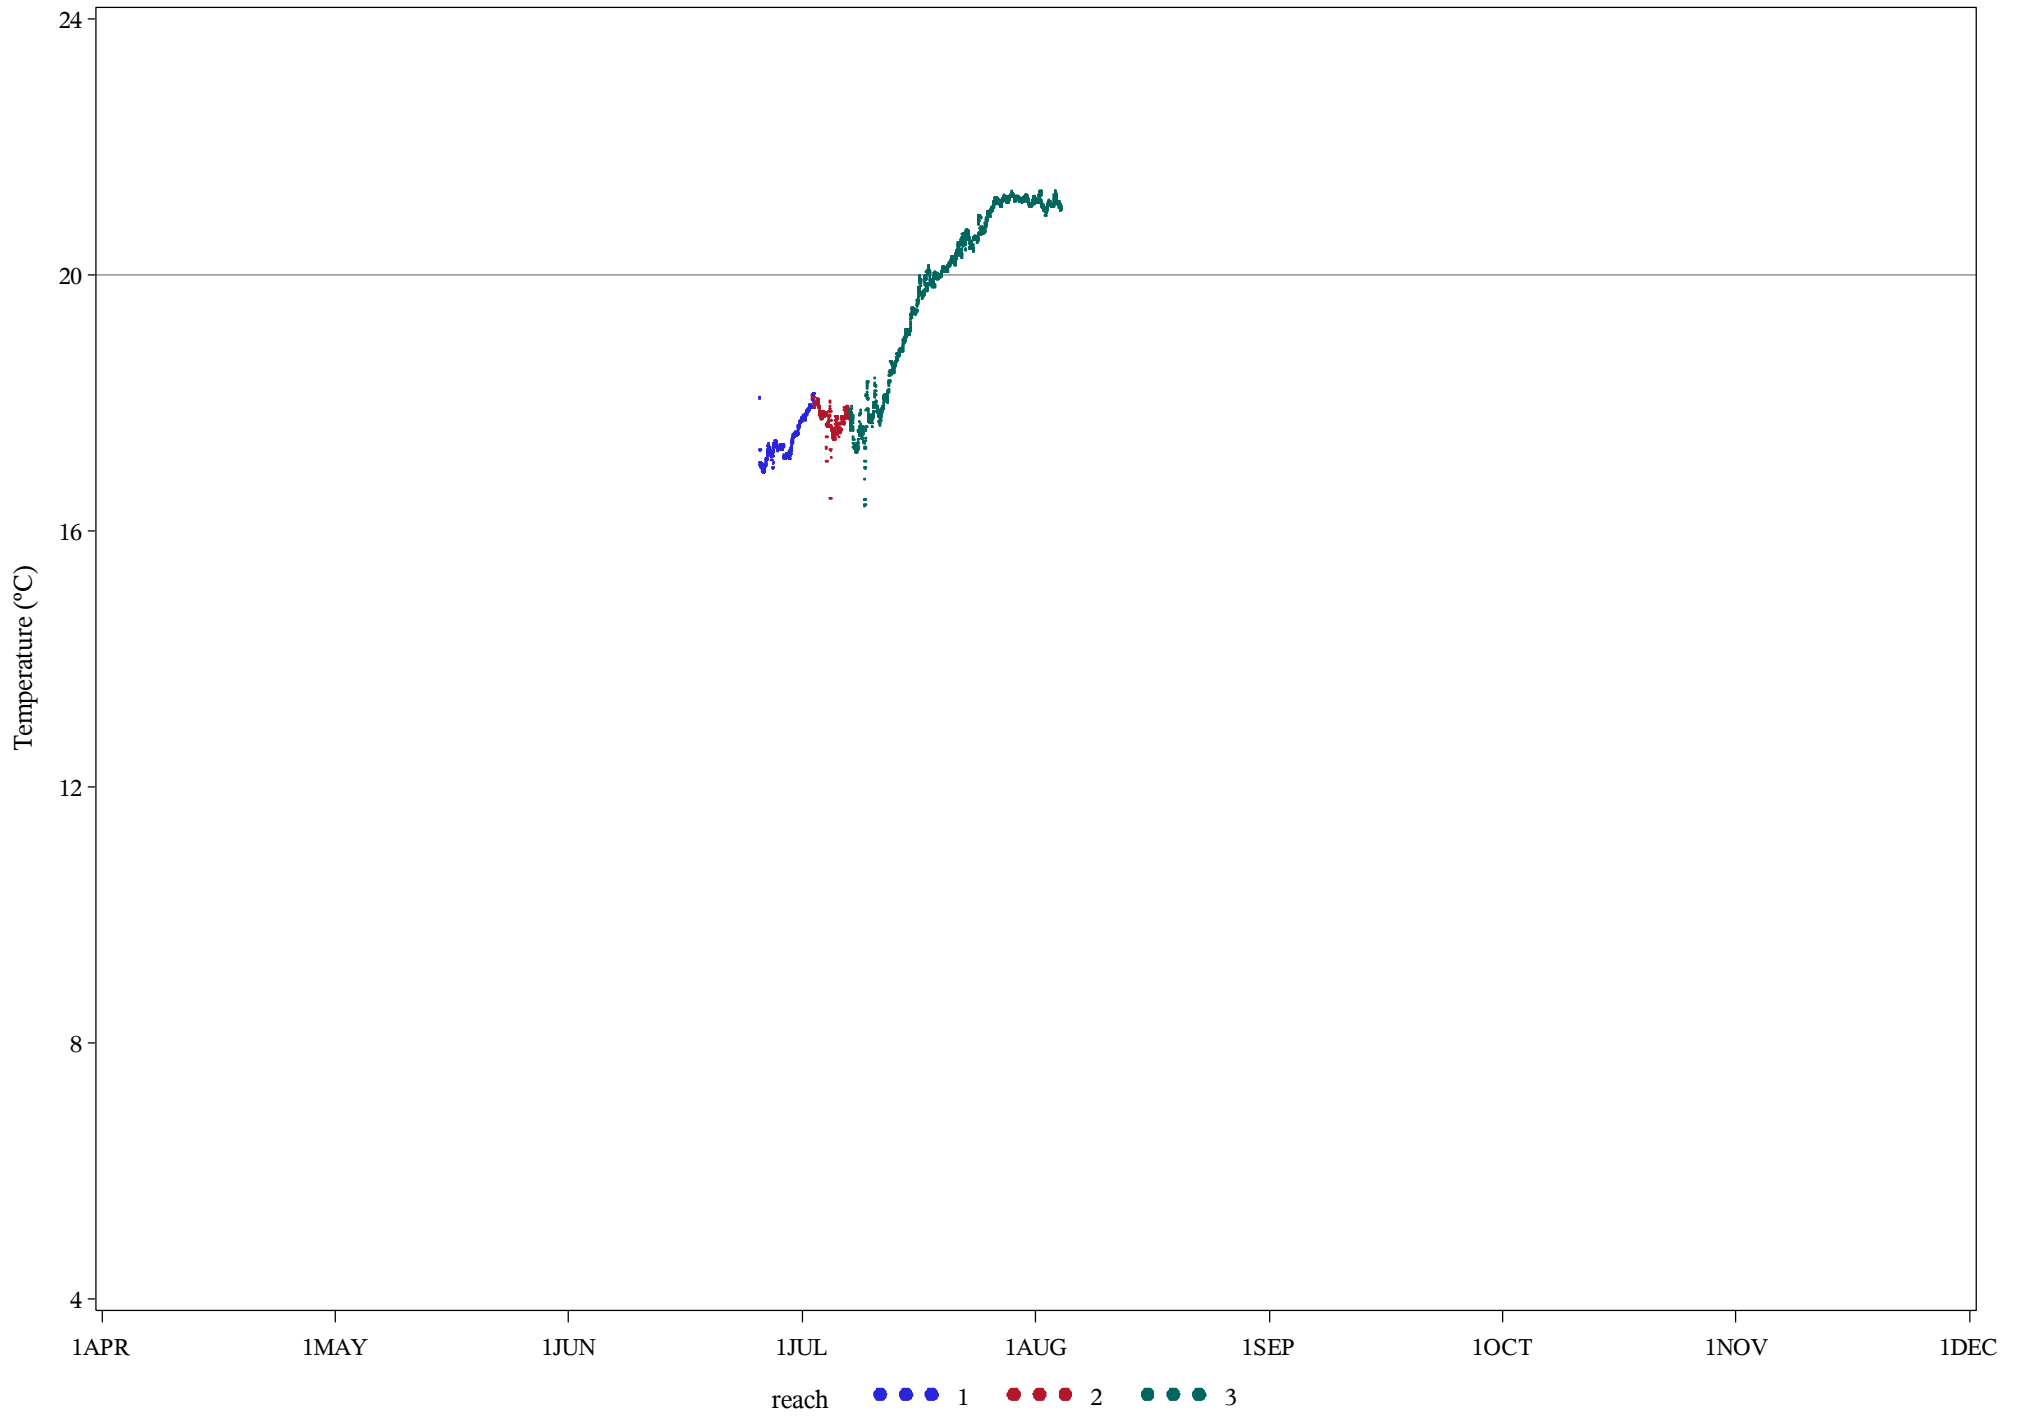



# Steelhead 4809B

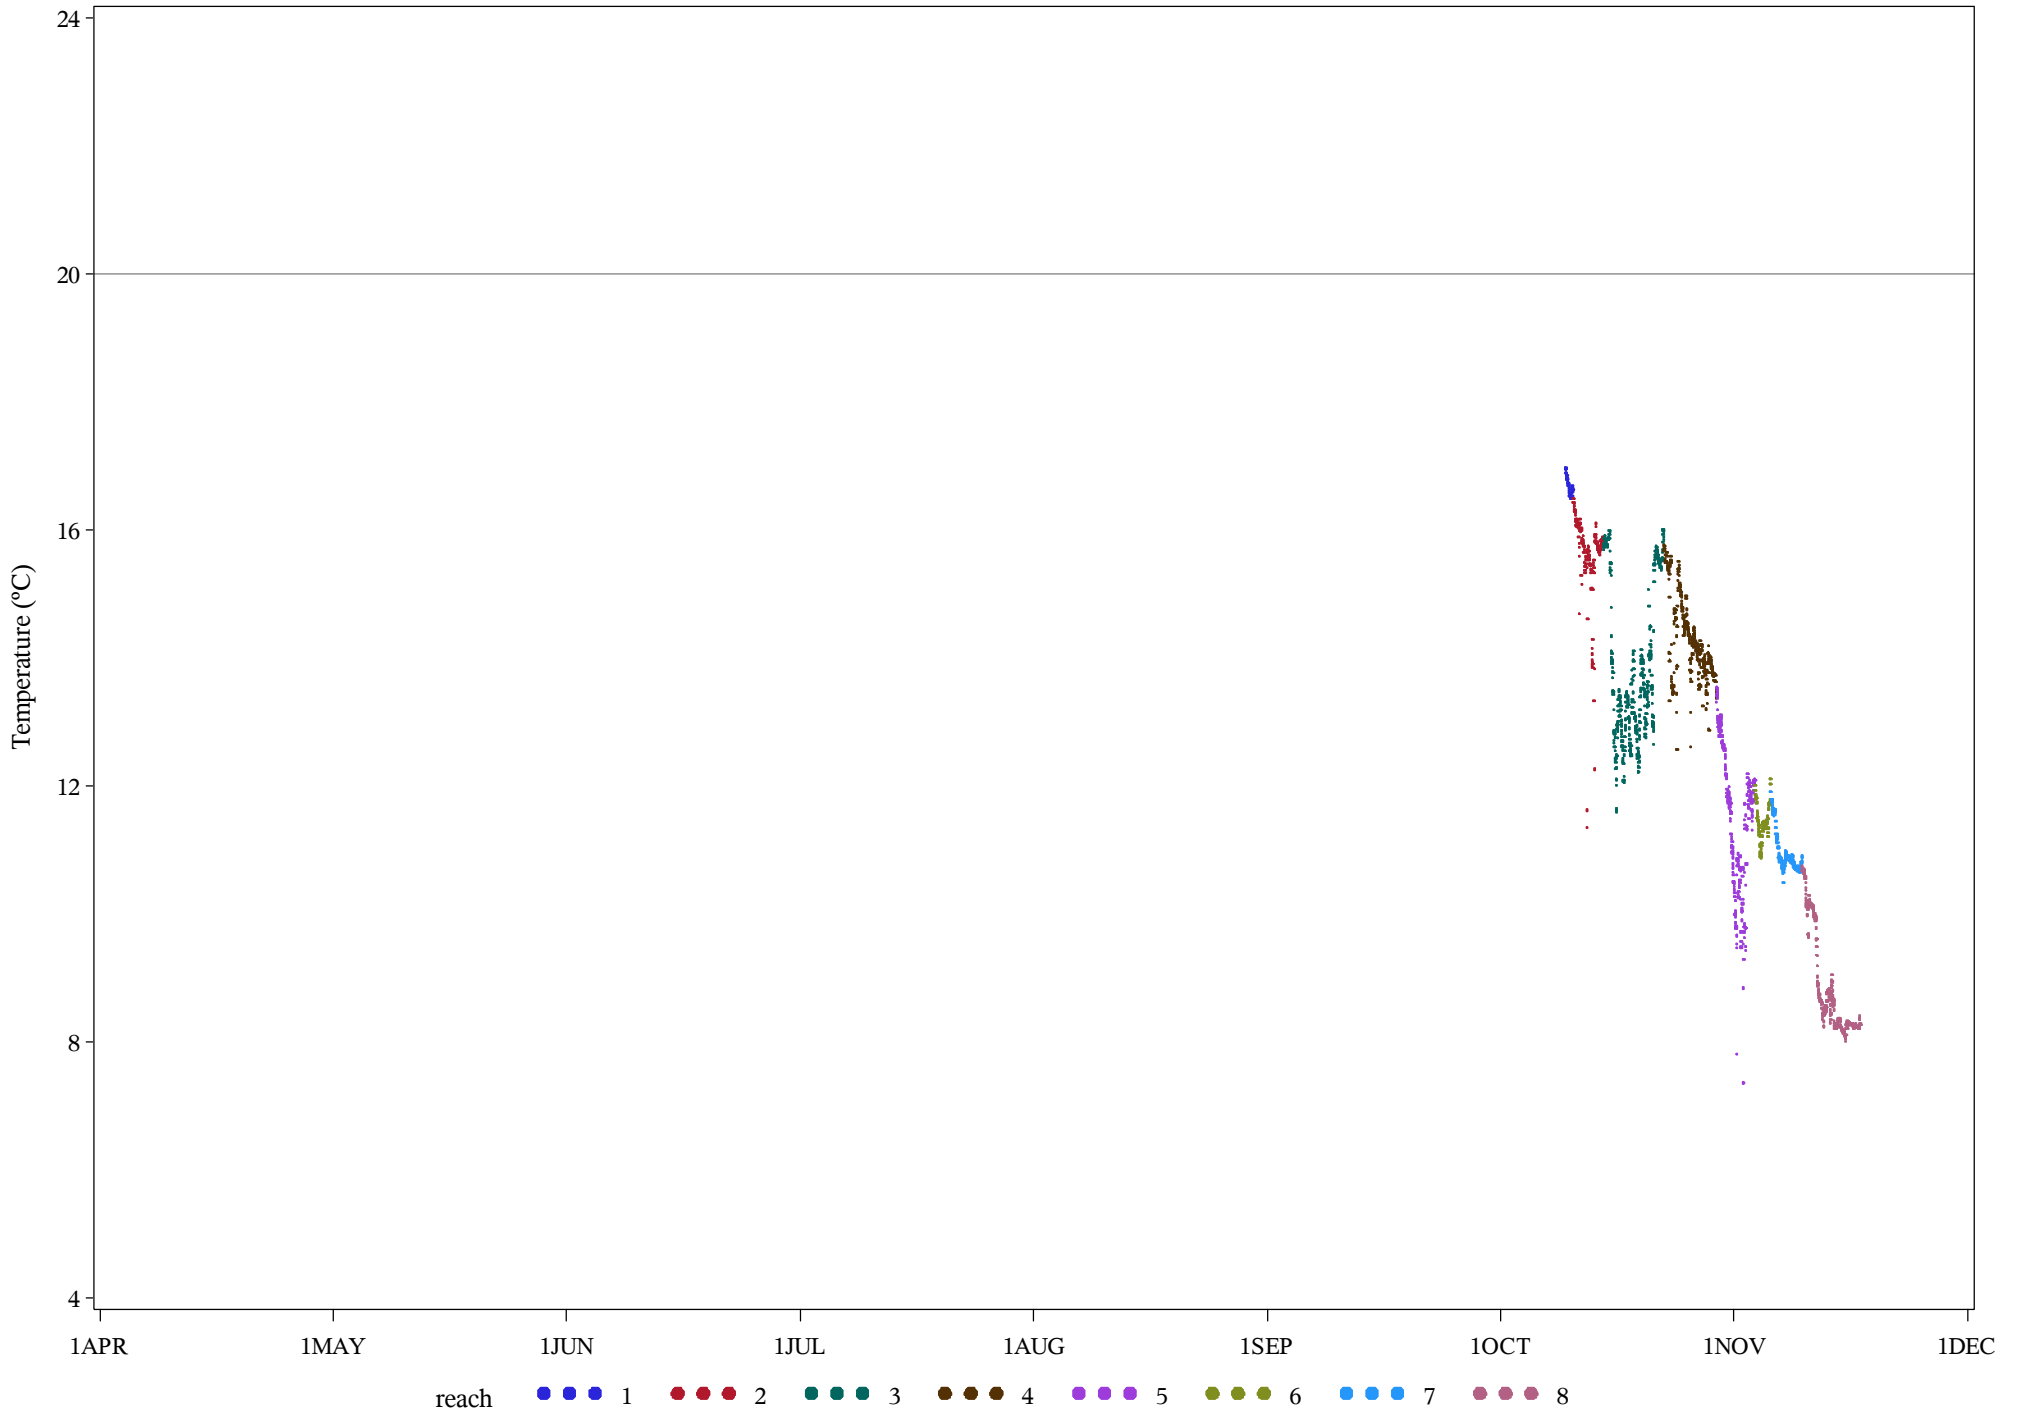

# Steelhead 4813B

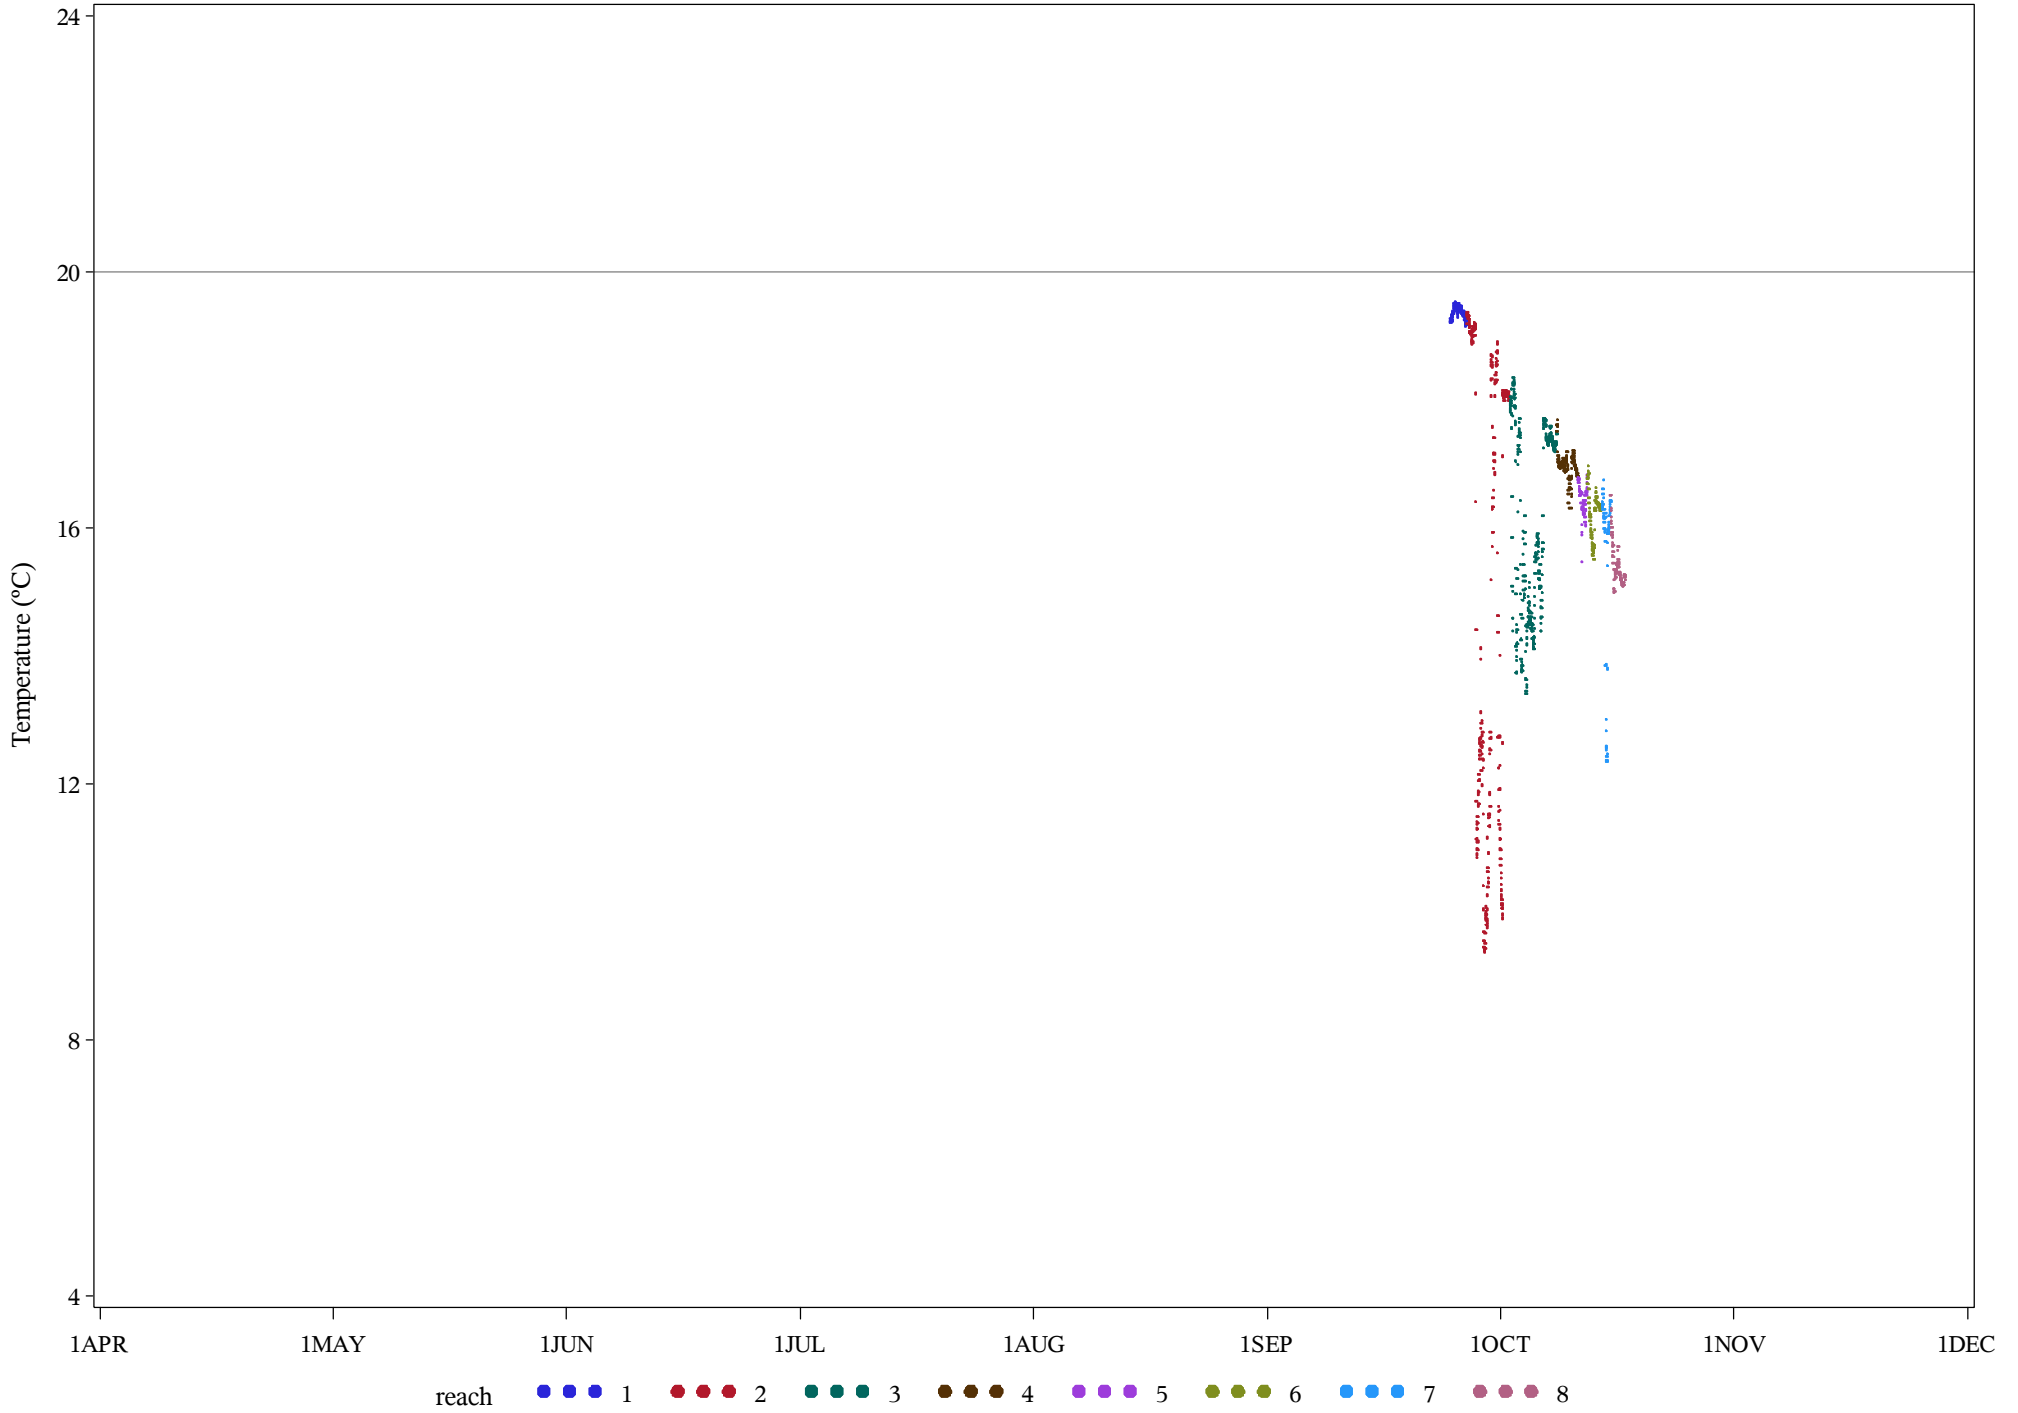





# Steelhead 4830A

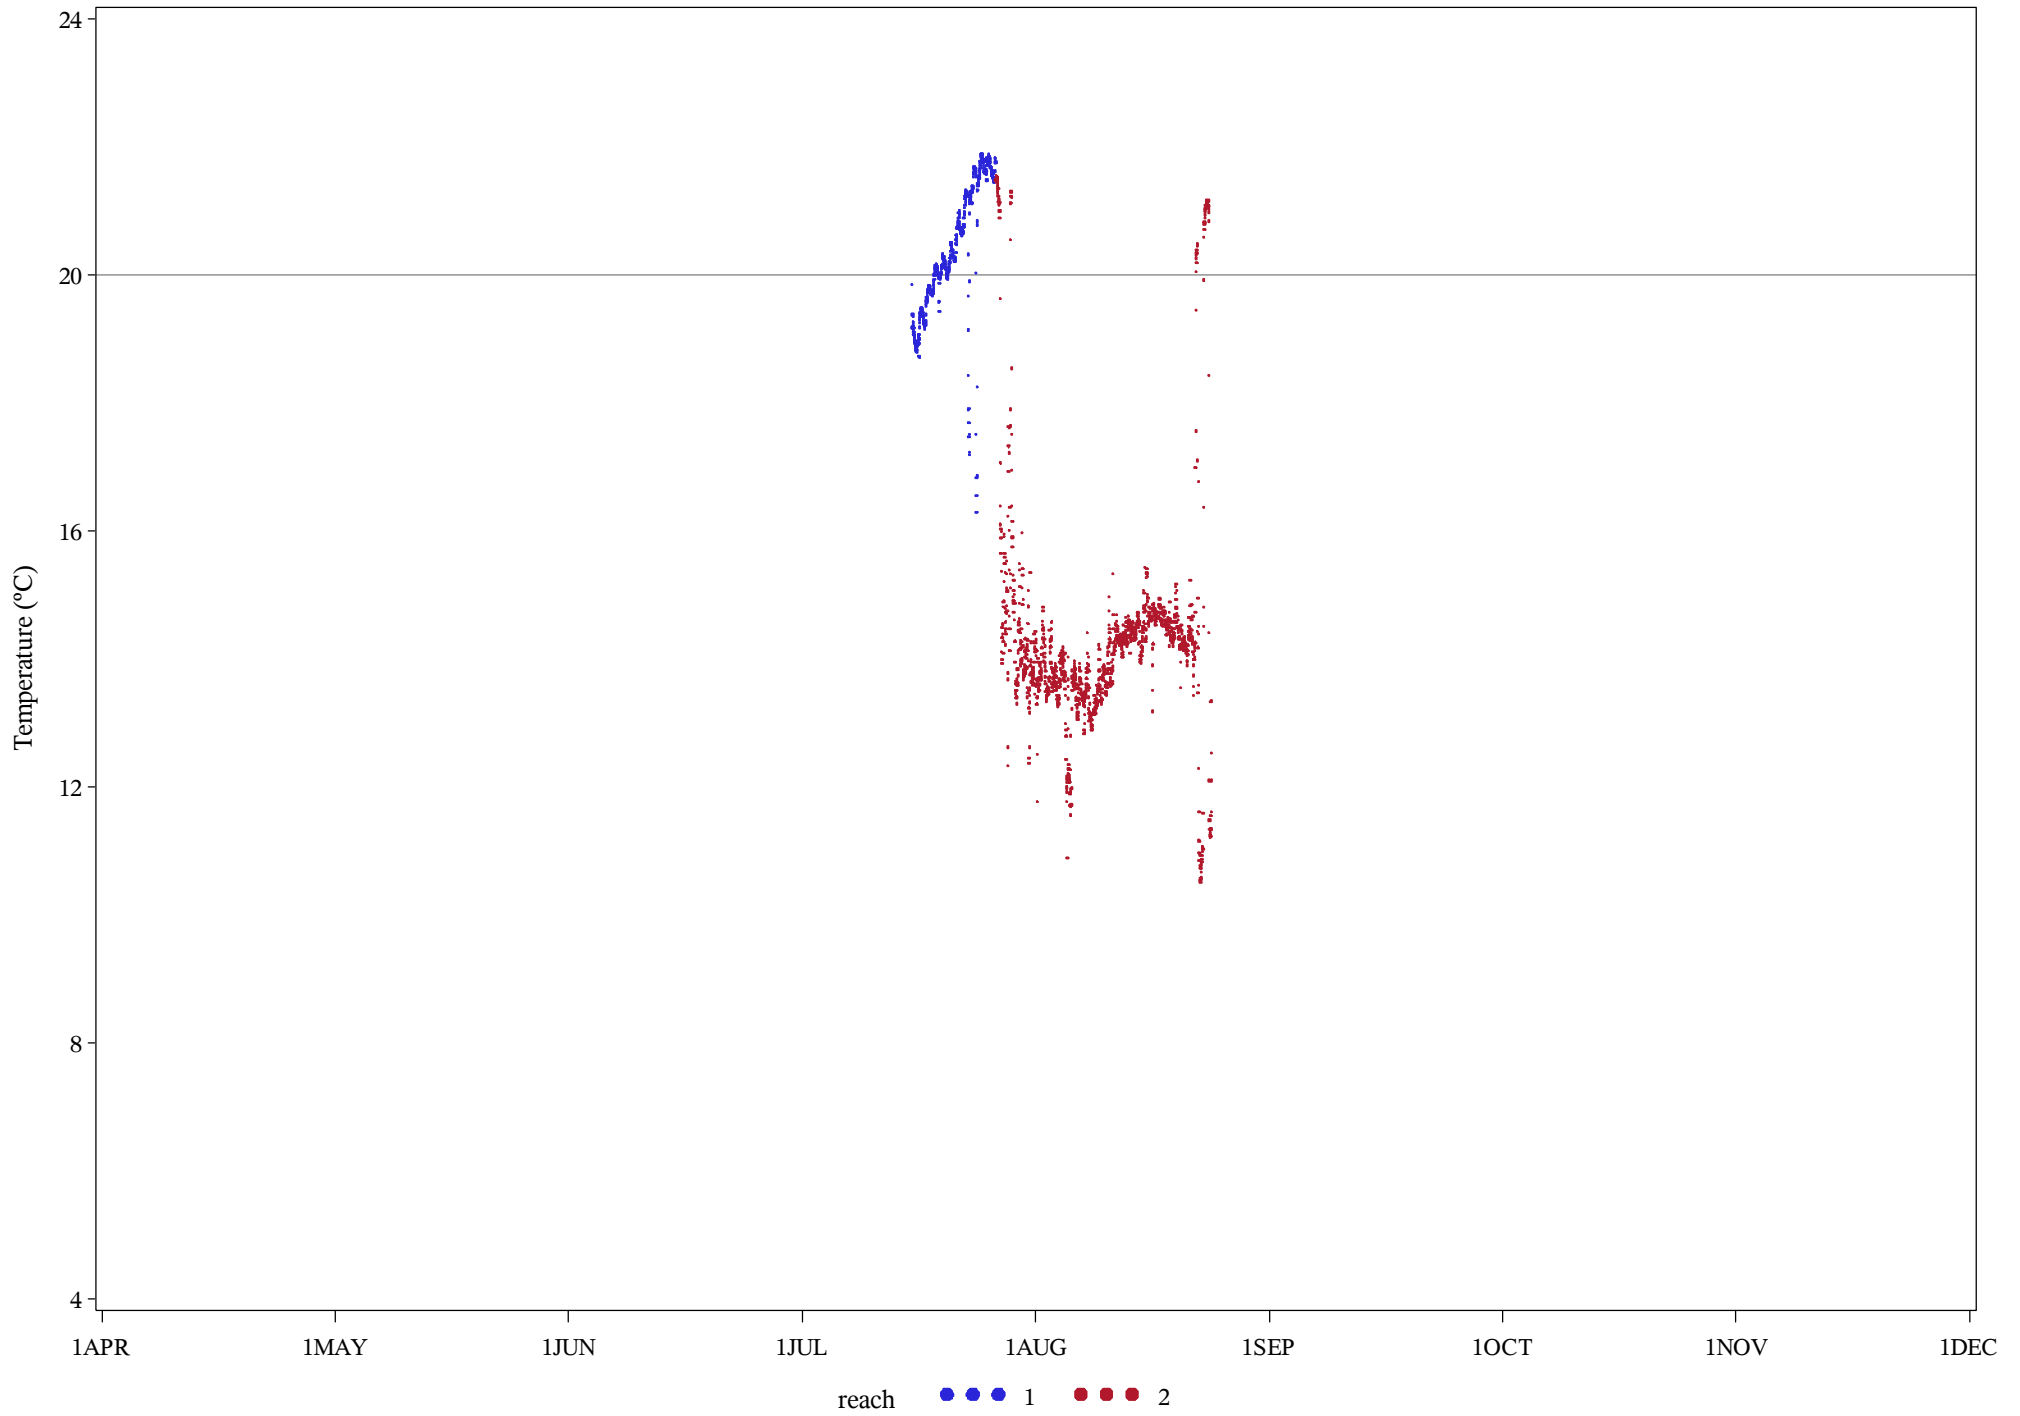



# Steelhead 4833A

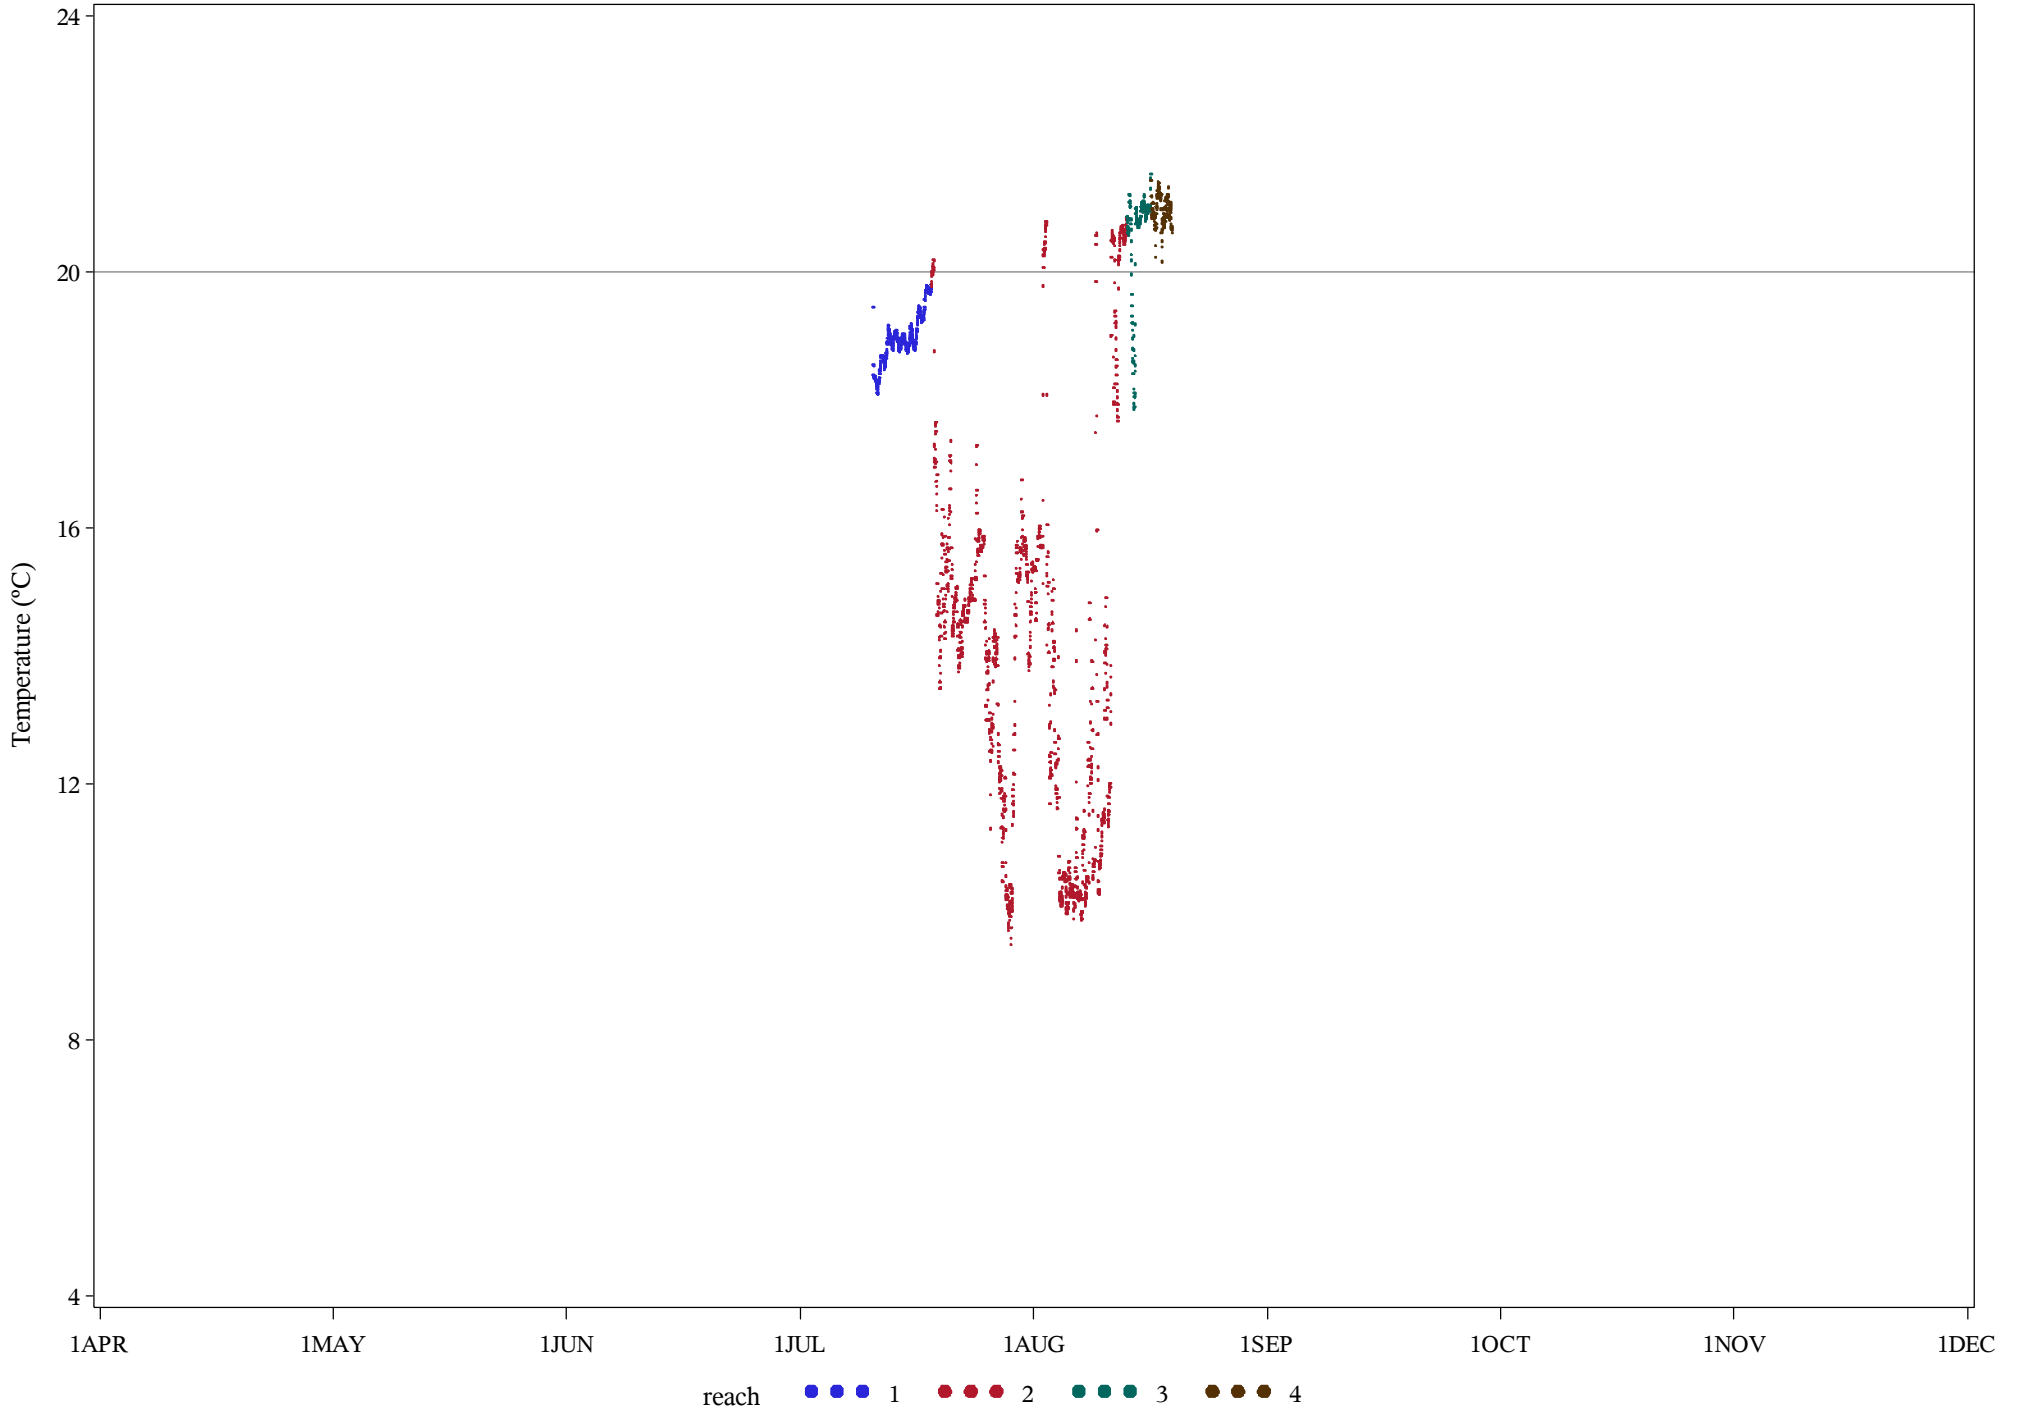

# Steelhead 4834A

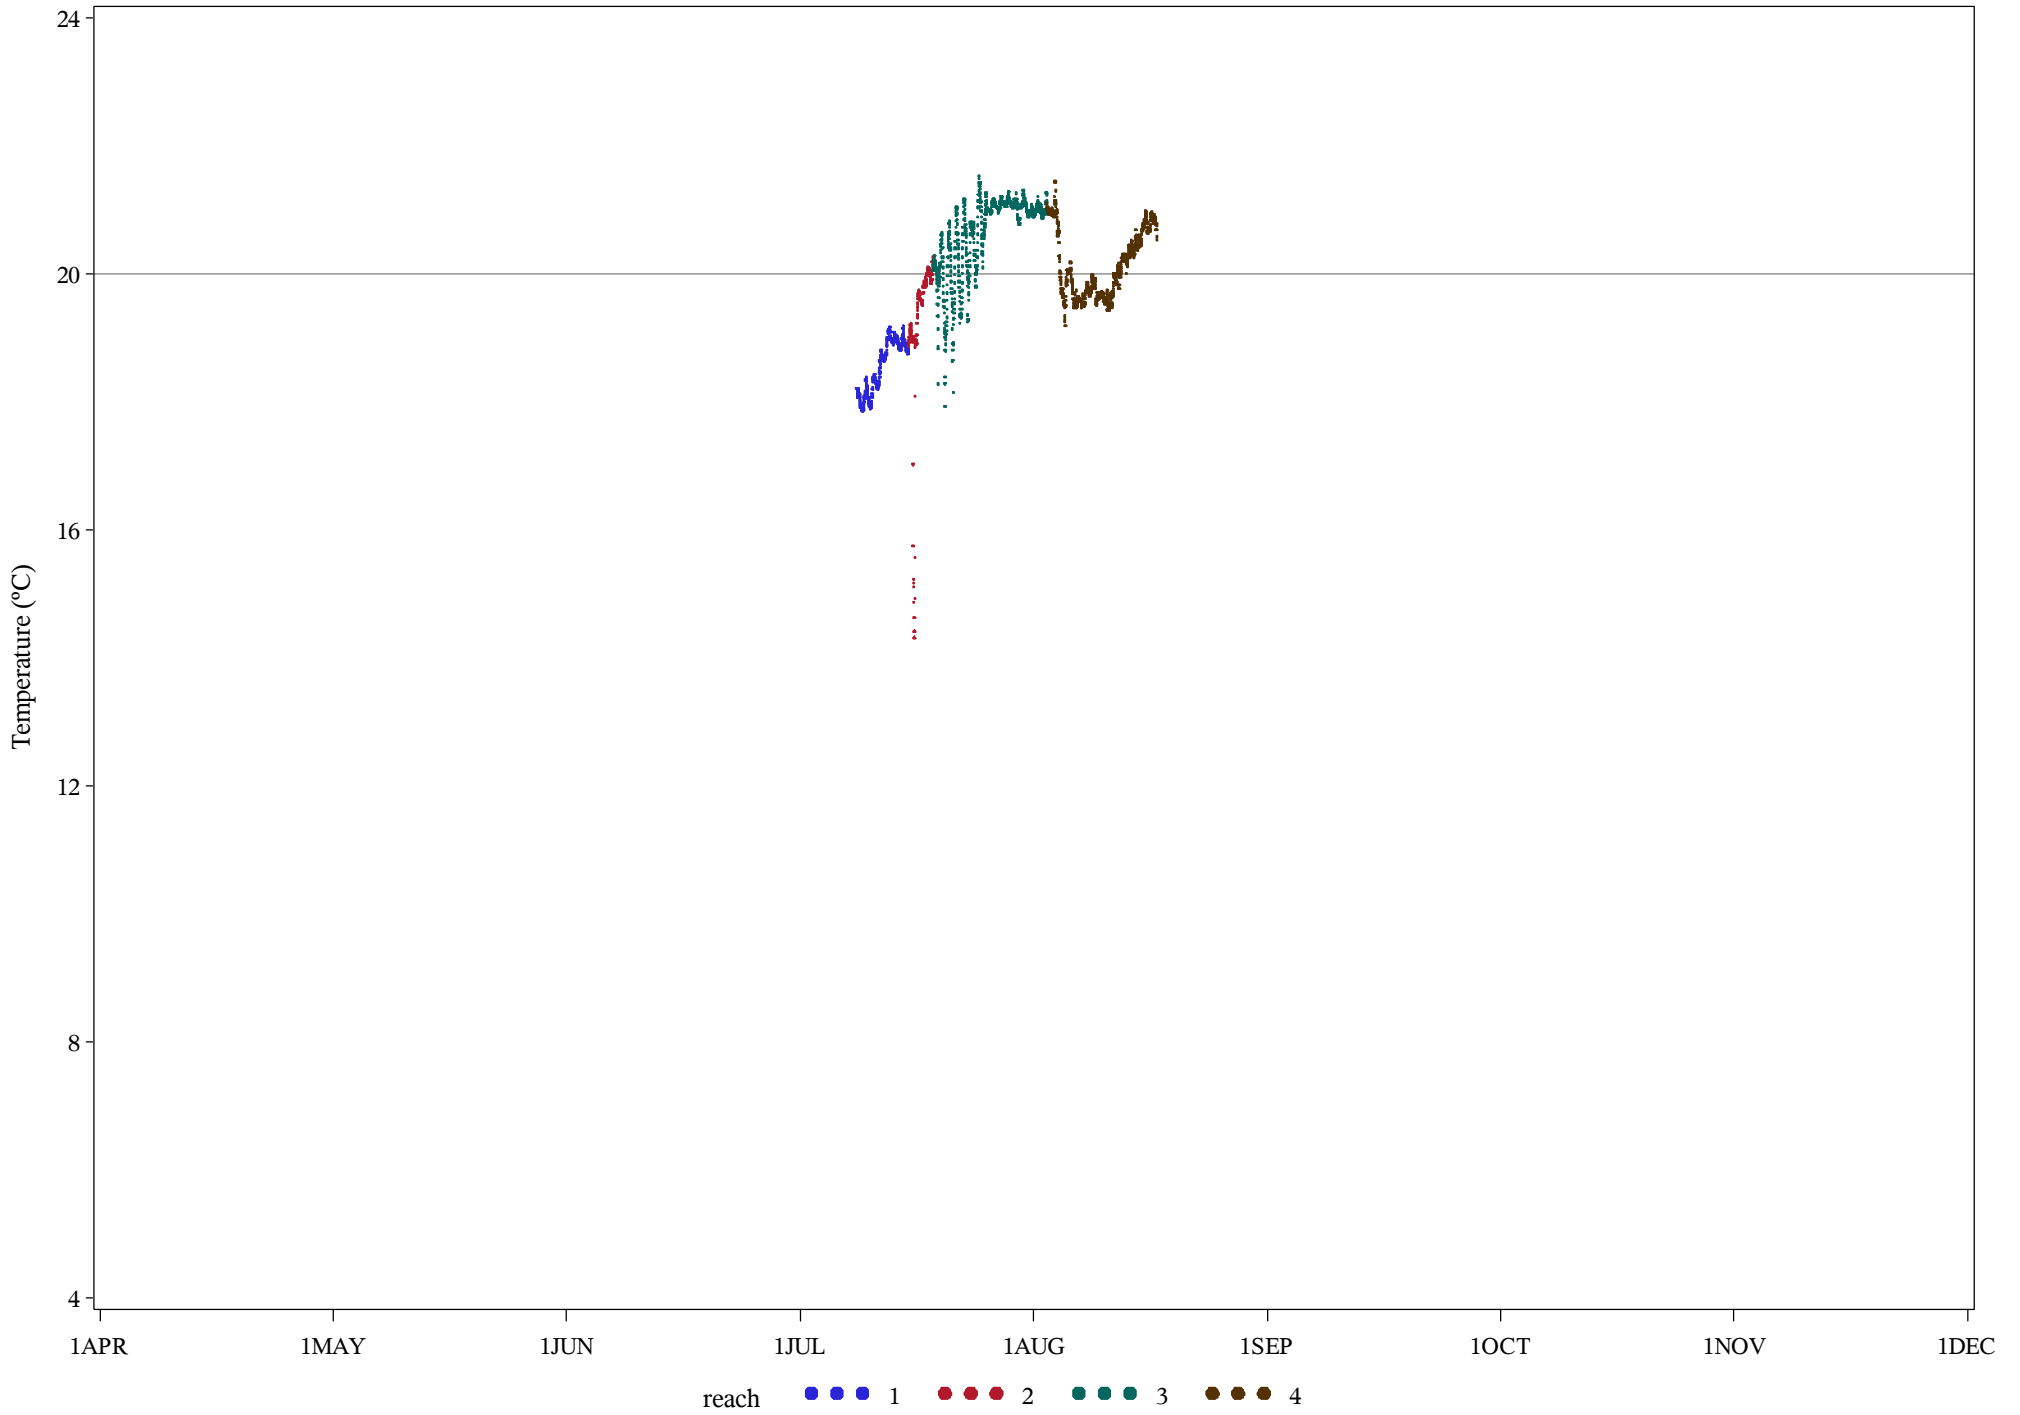

# Steelhead 4837B

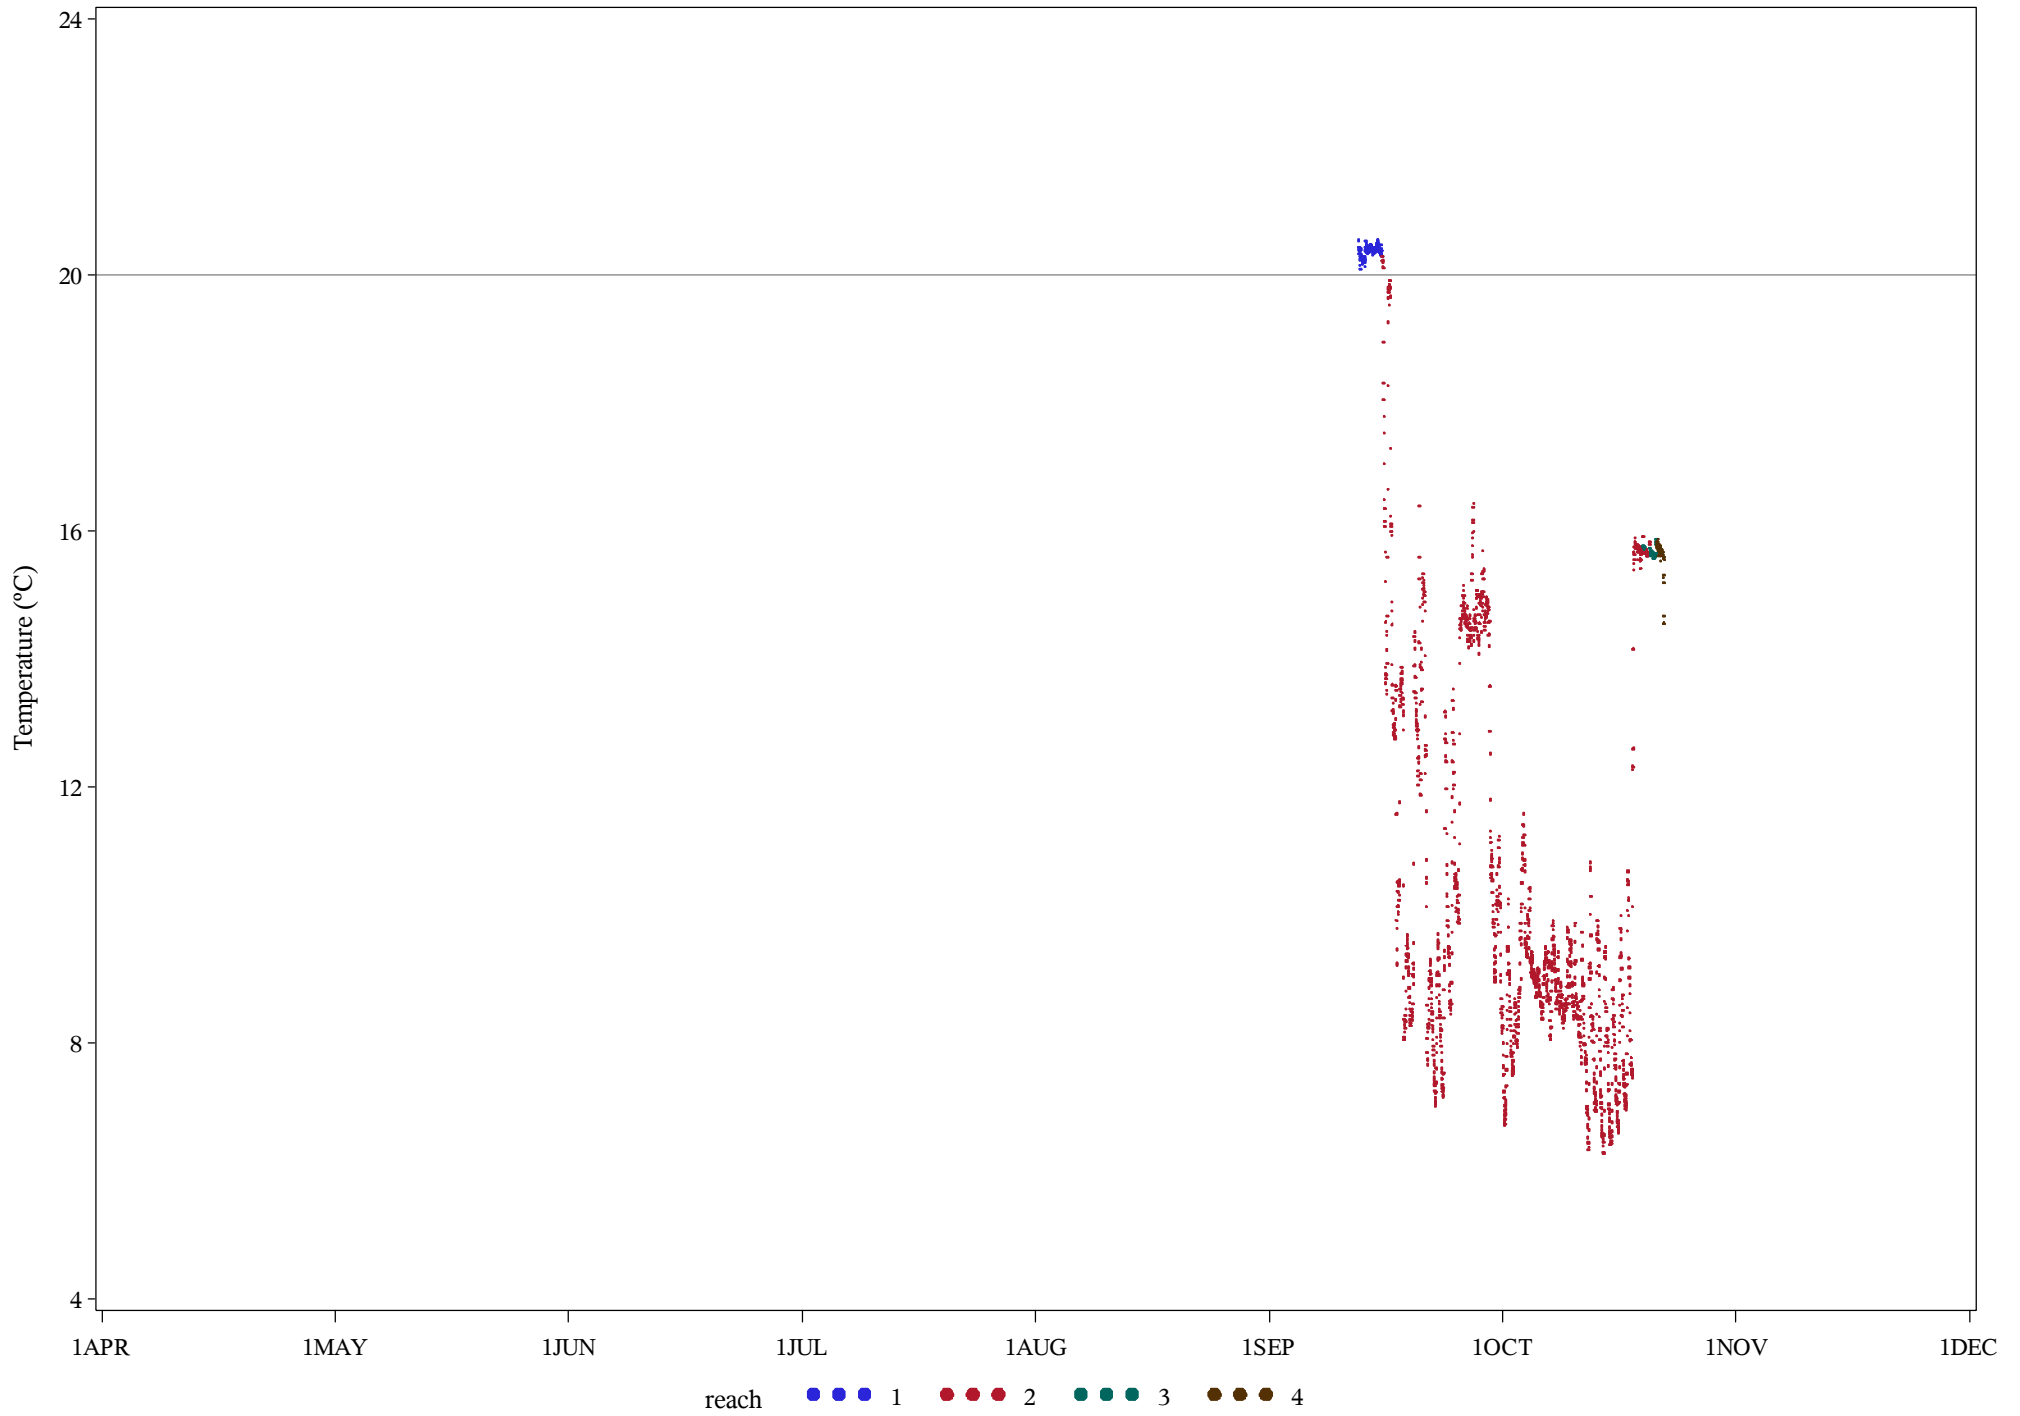

# Steelhead 4838A

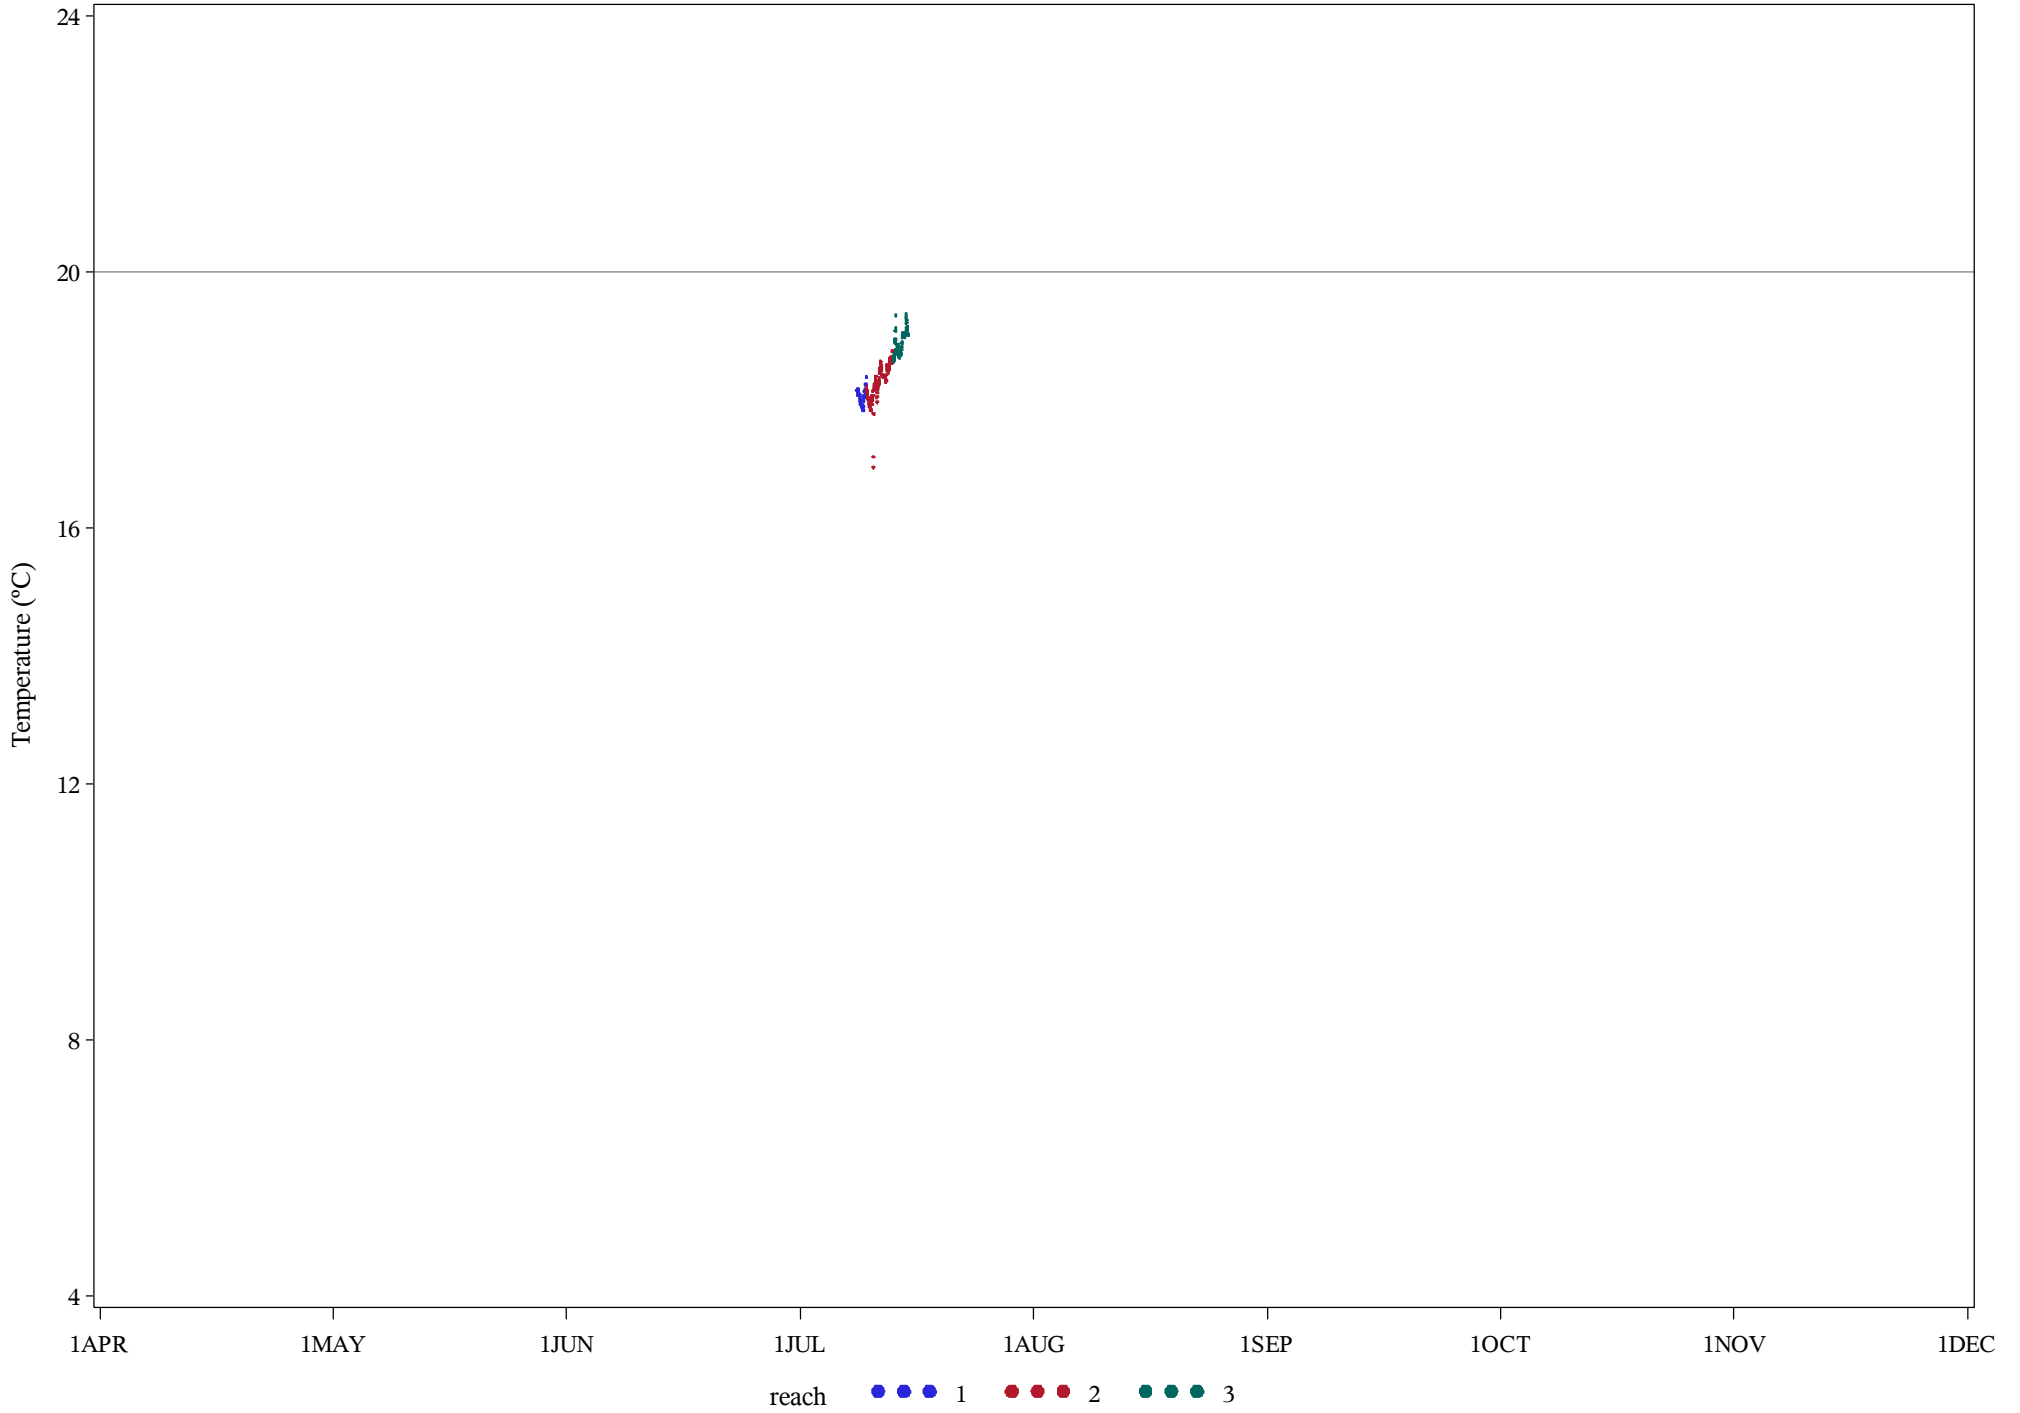

# Steelhead 4838B

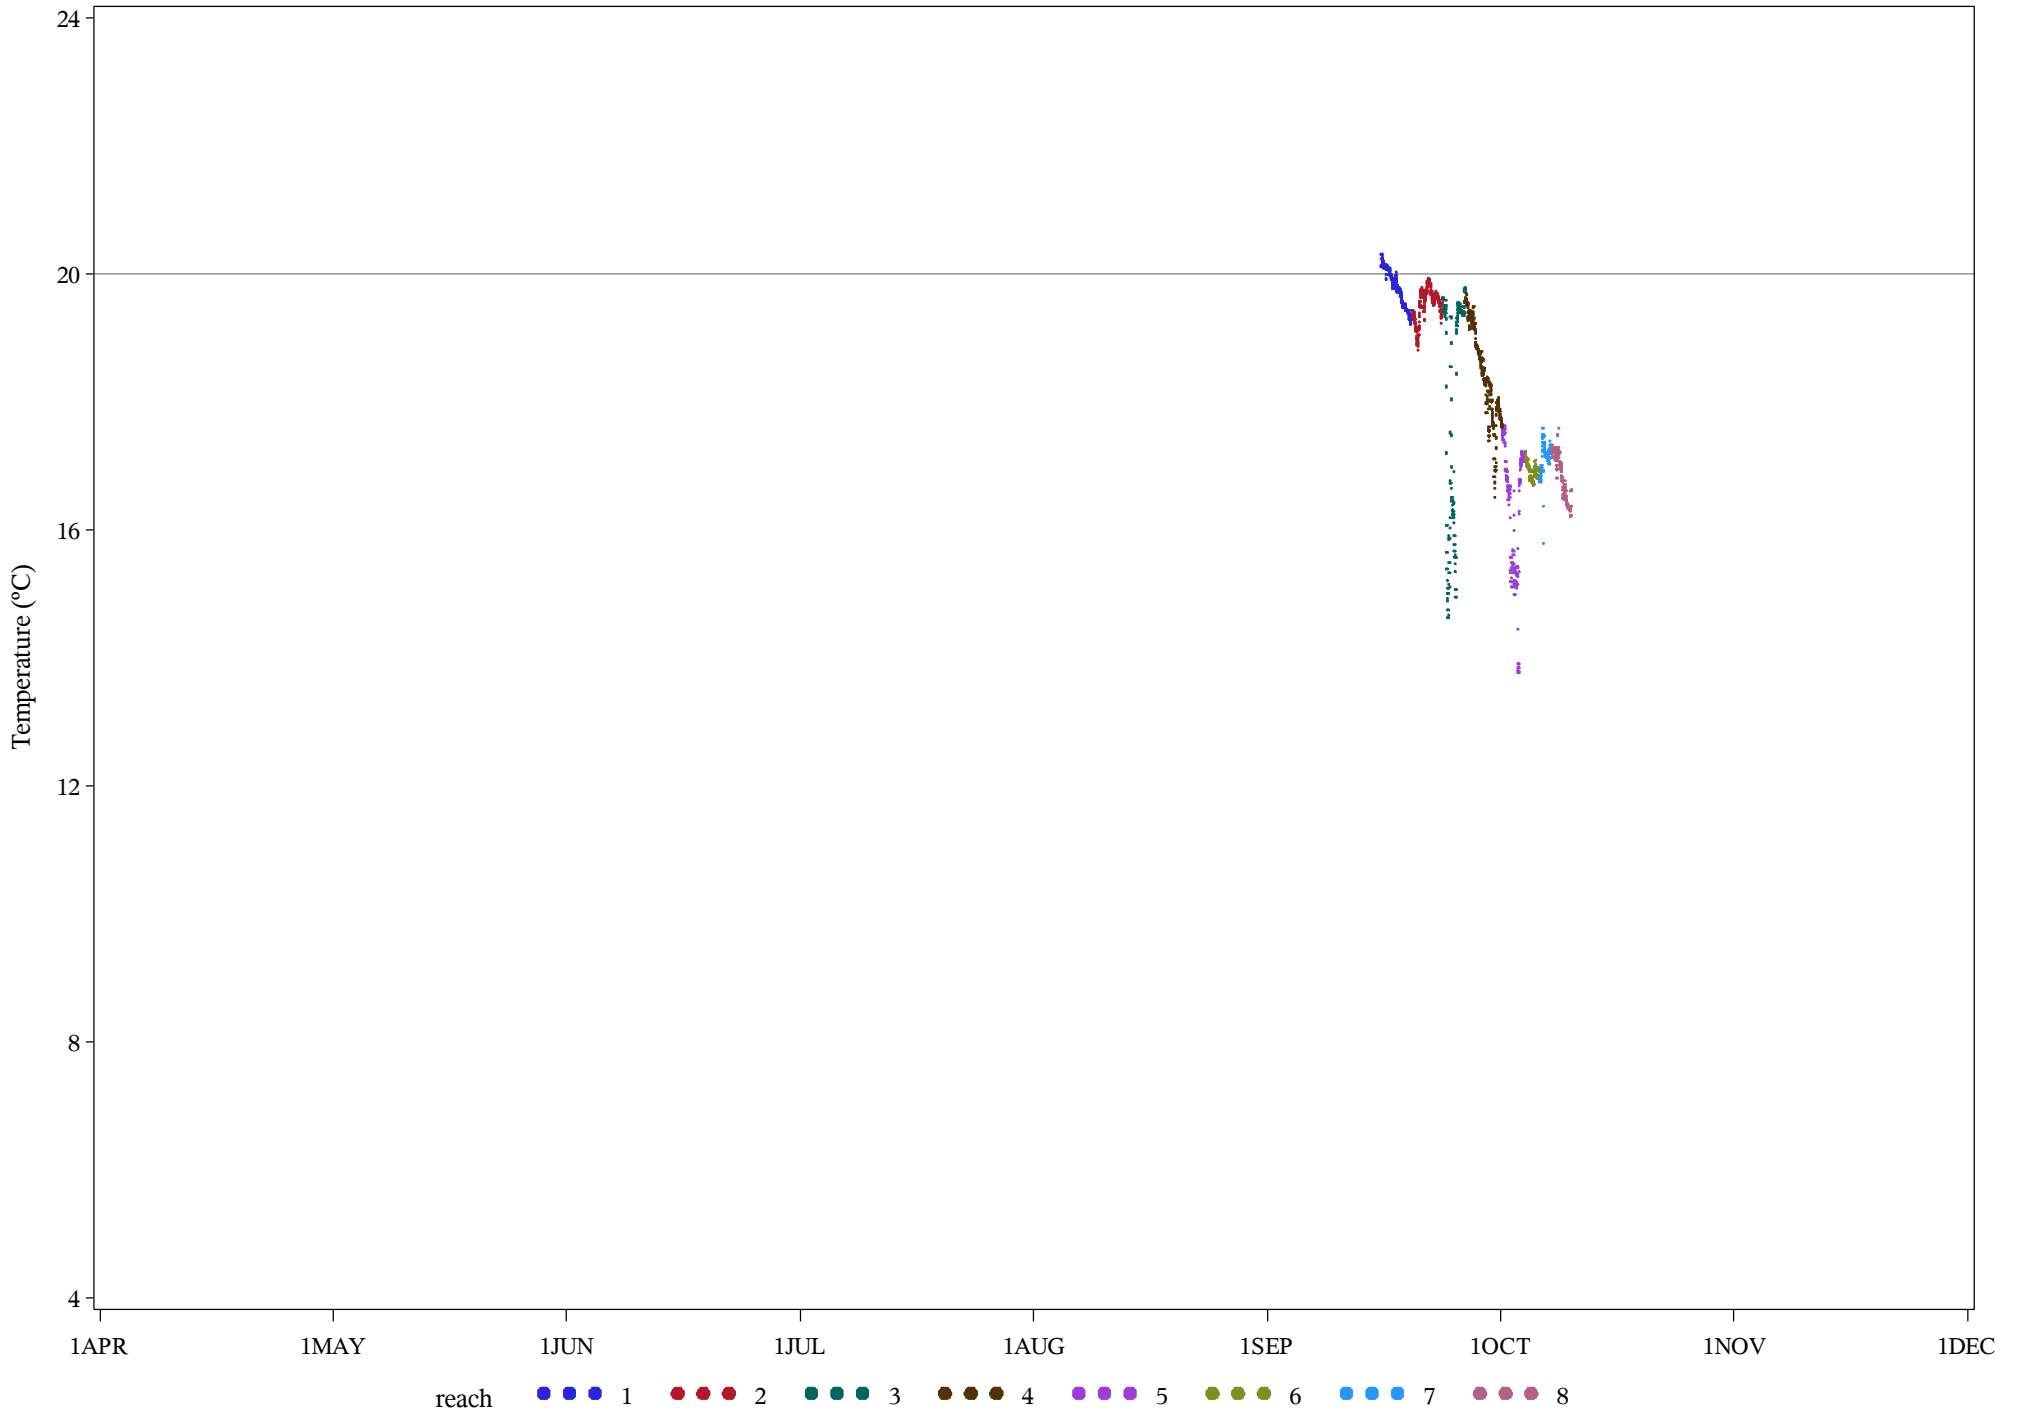

# Steelhead 4841B

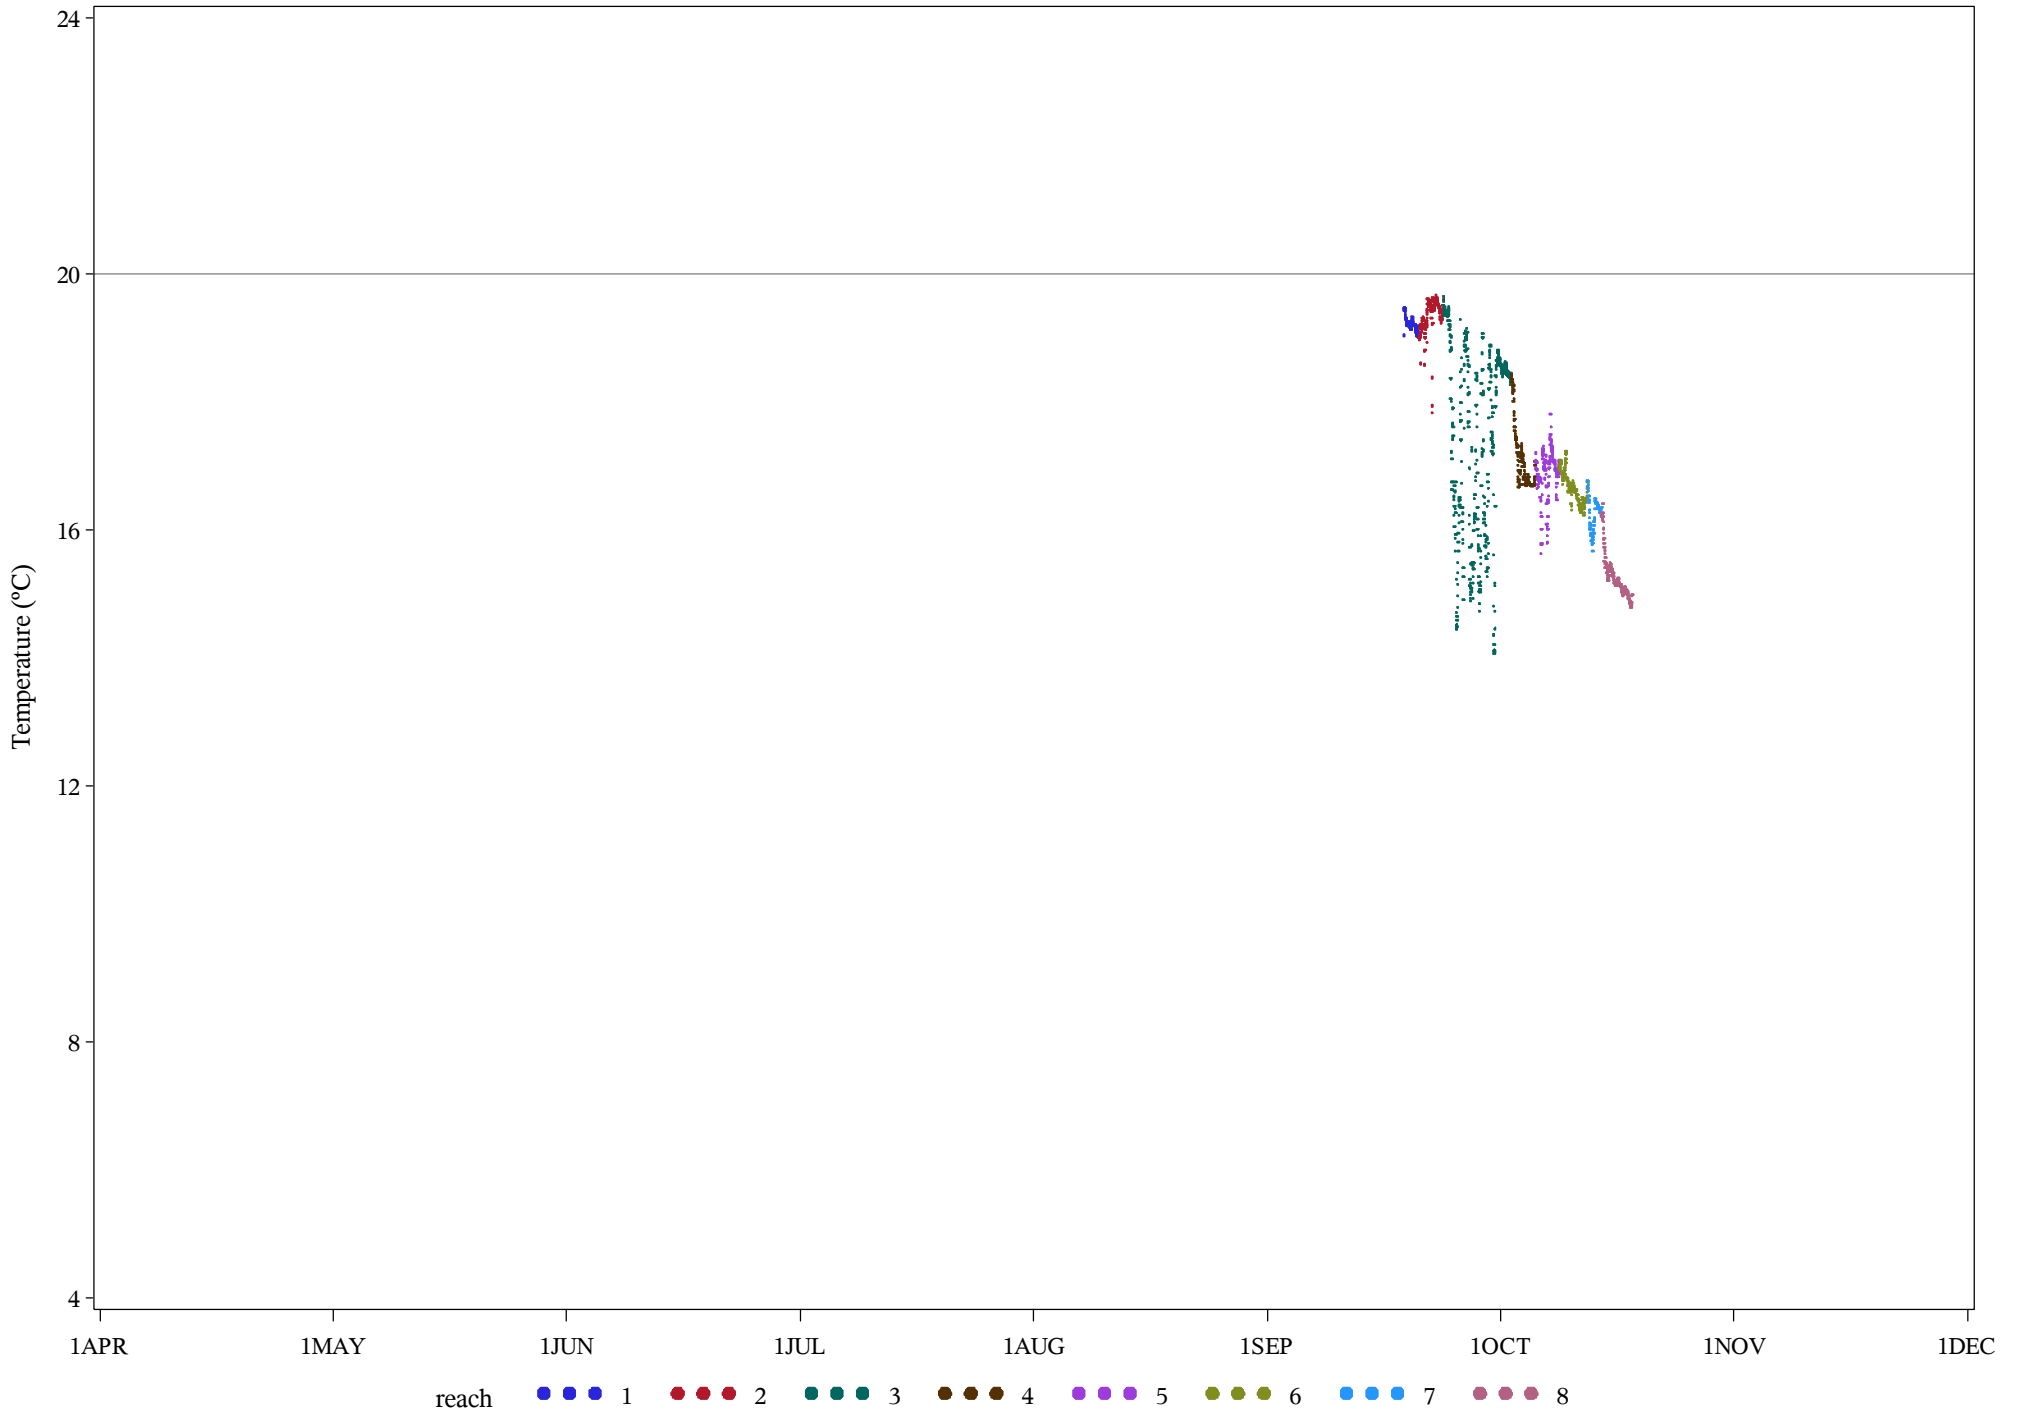

# Steelhead 4844B

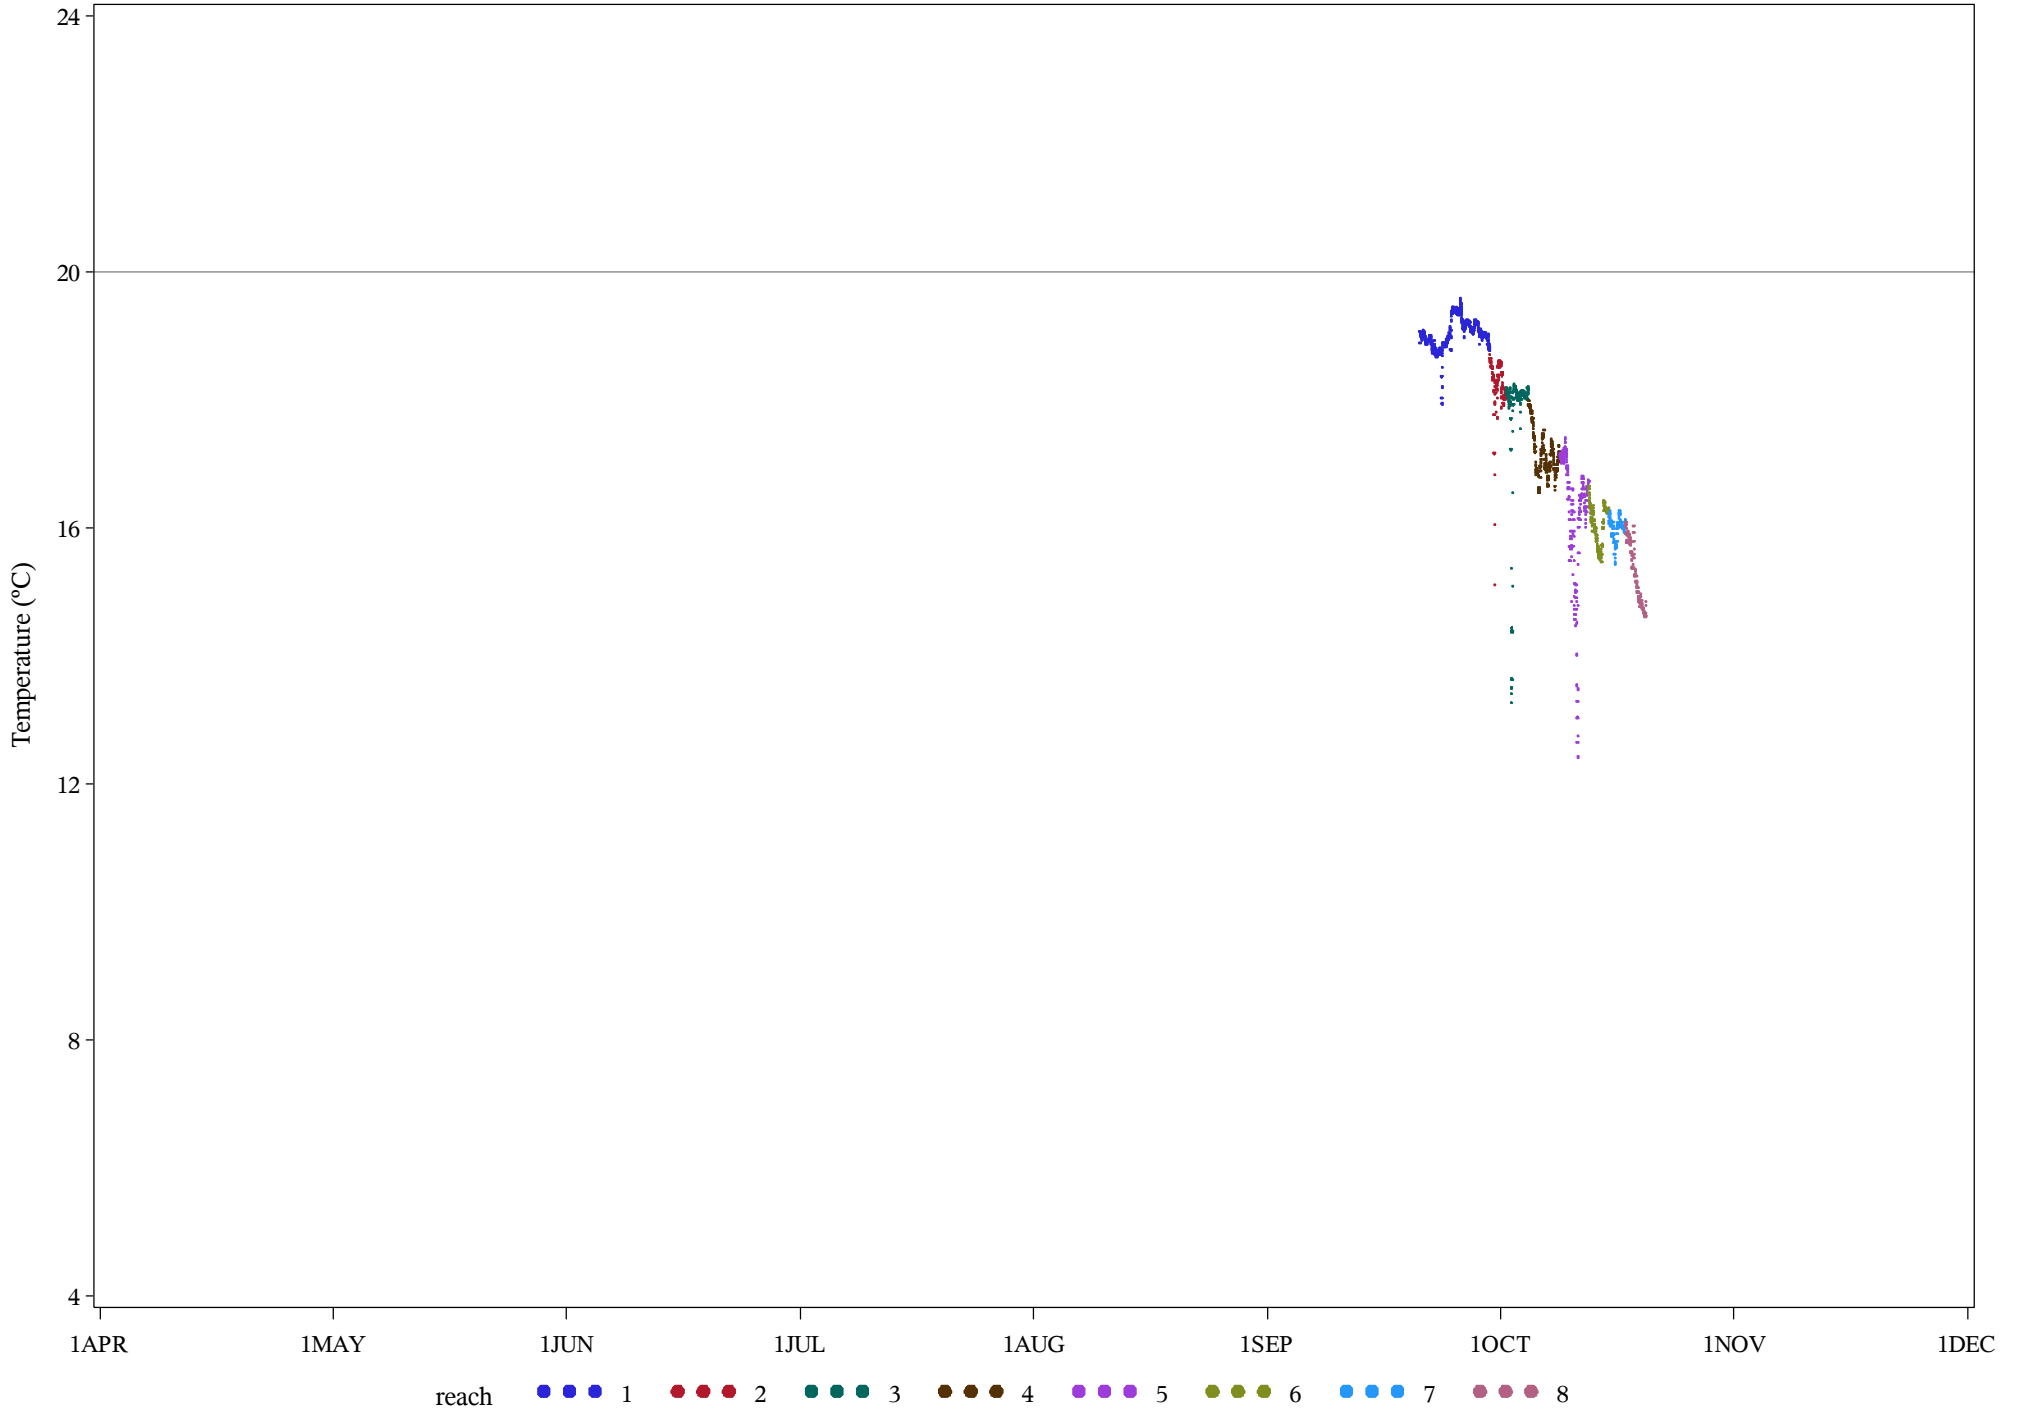

# Steelhead 4869C

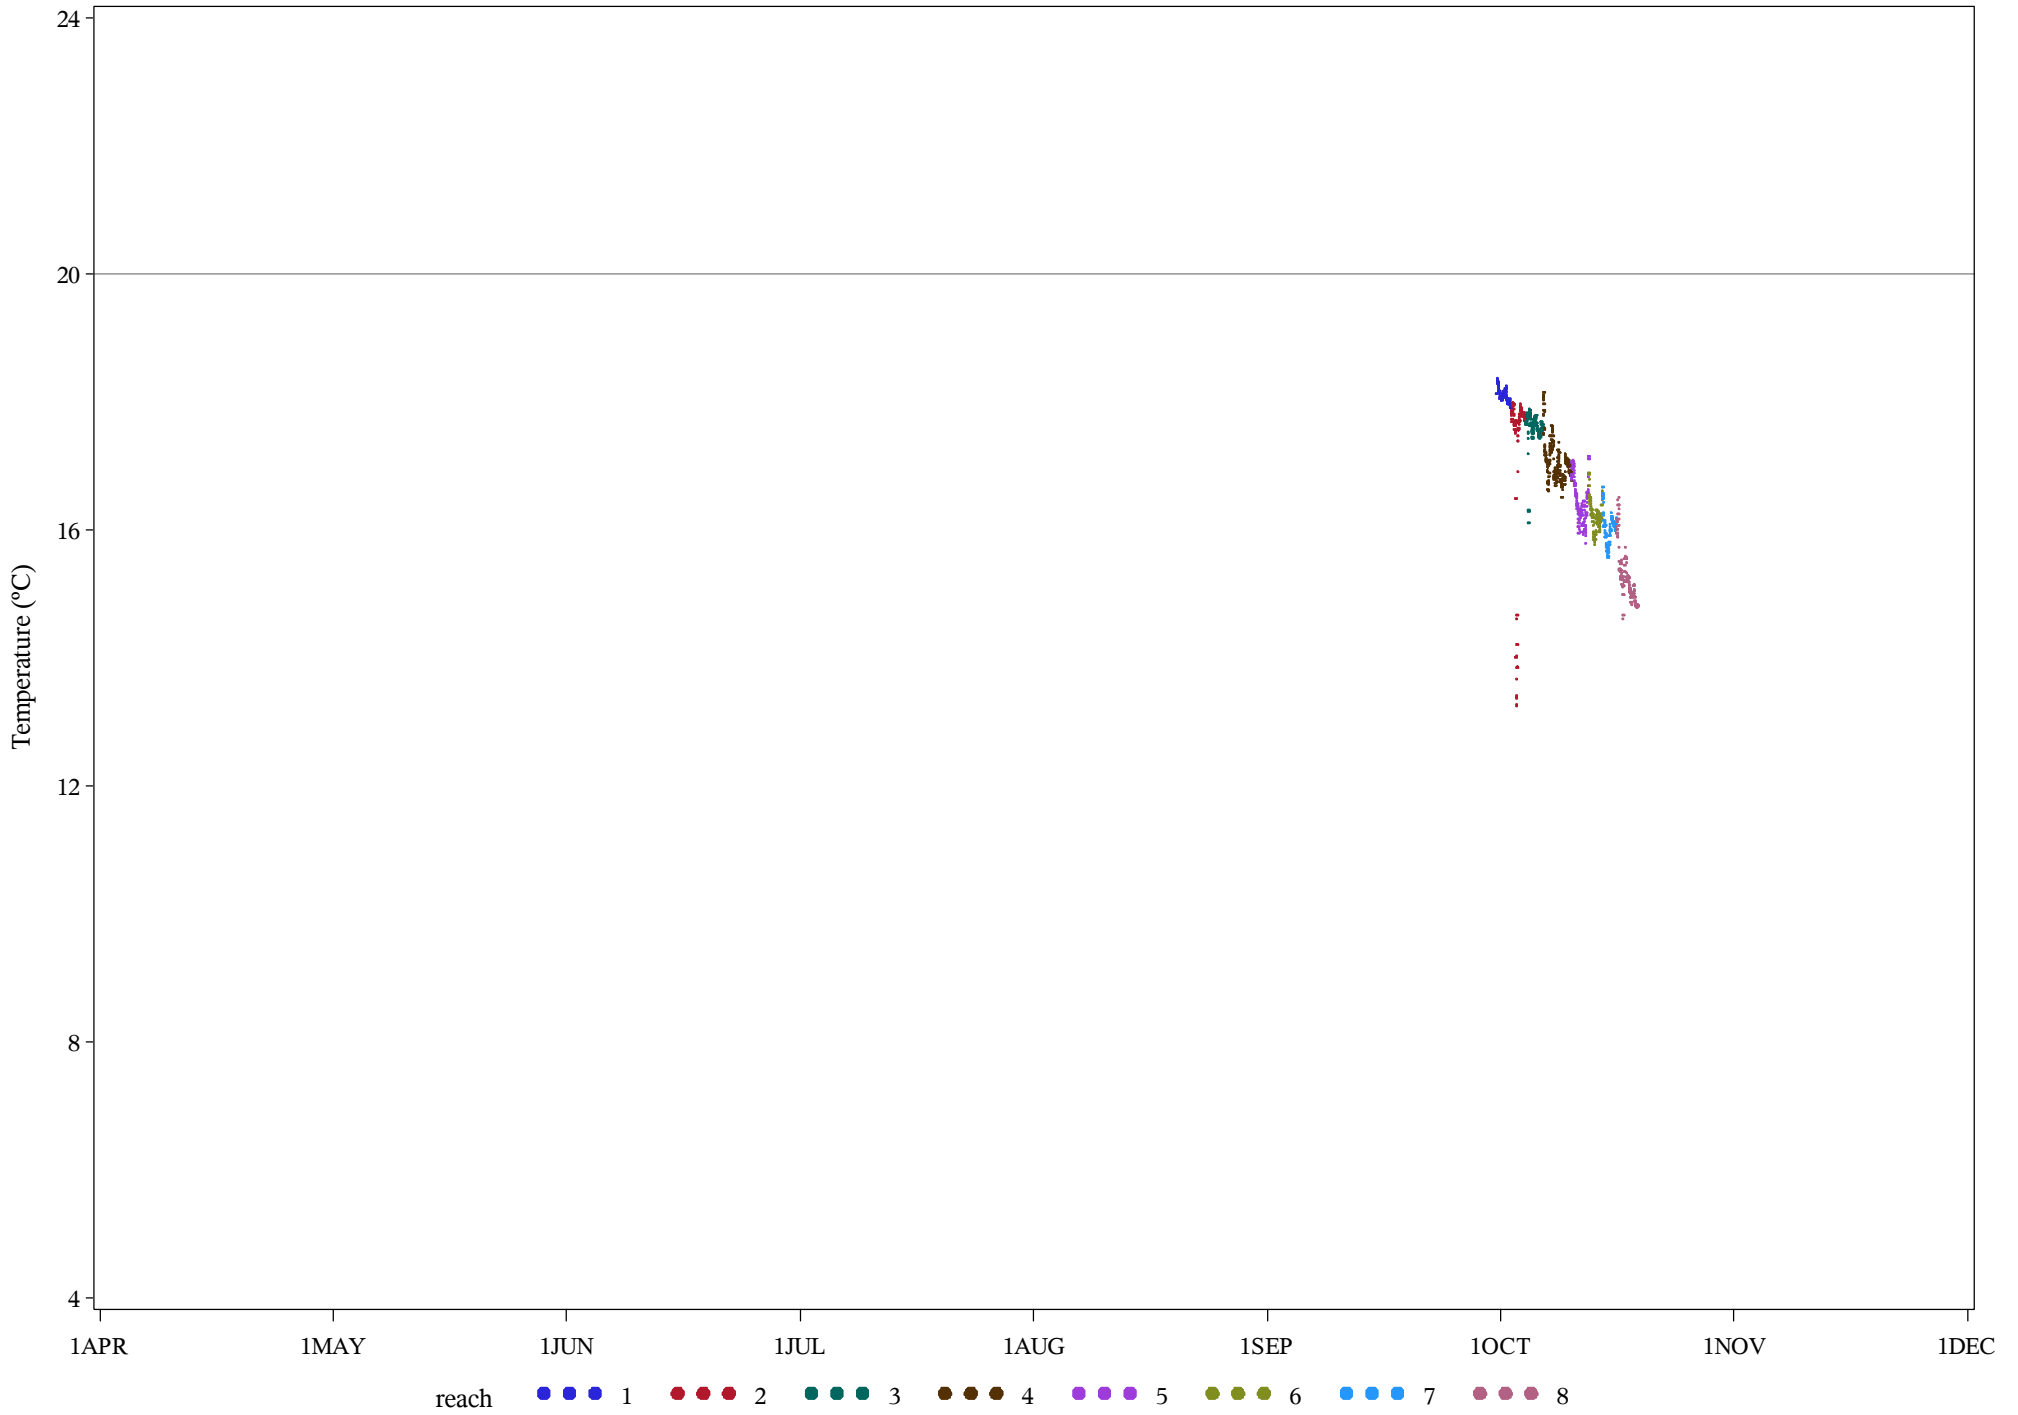



# Steelhead 4870B

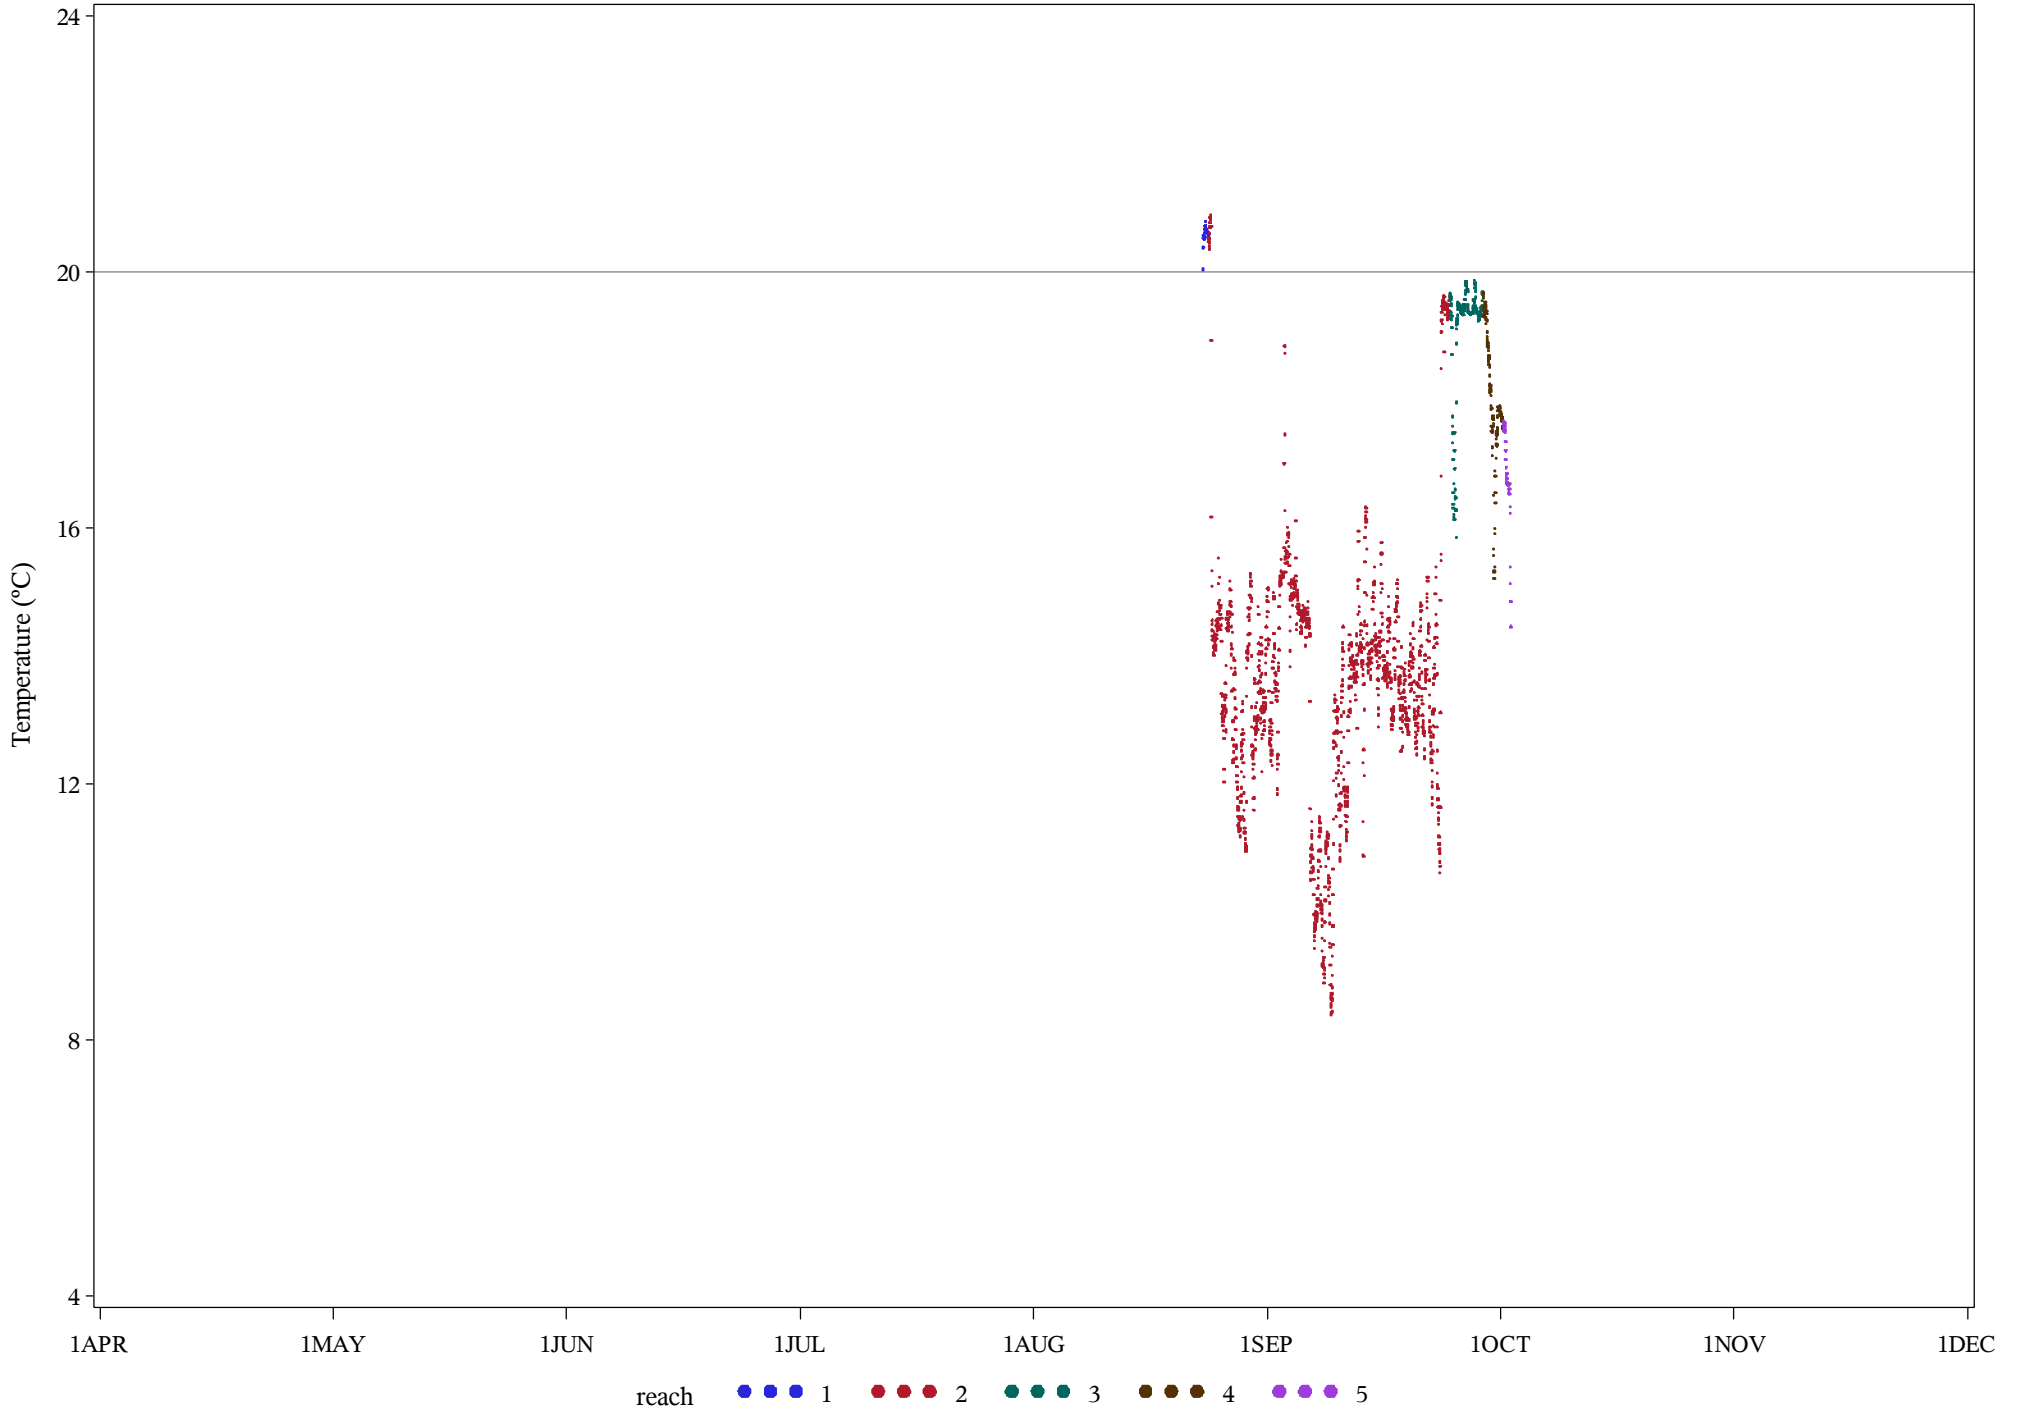

# Steelhead 4879C

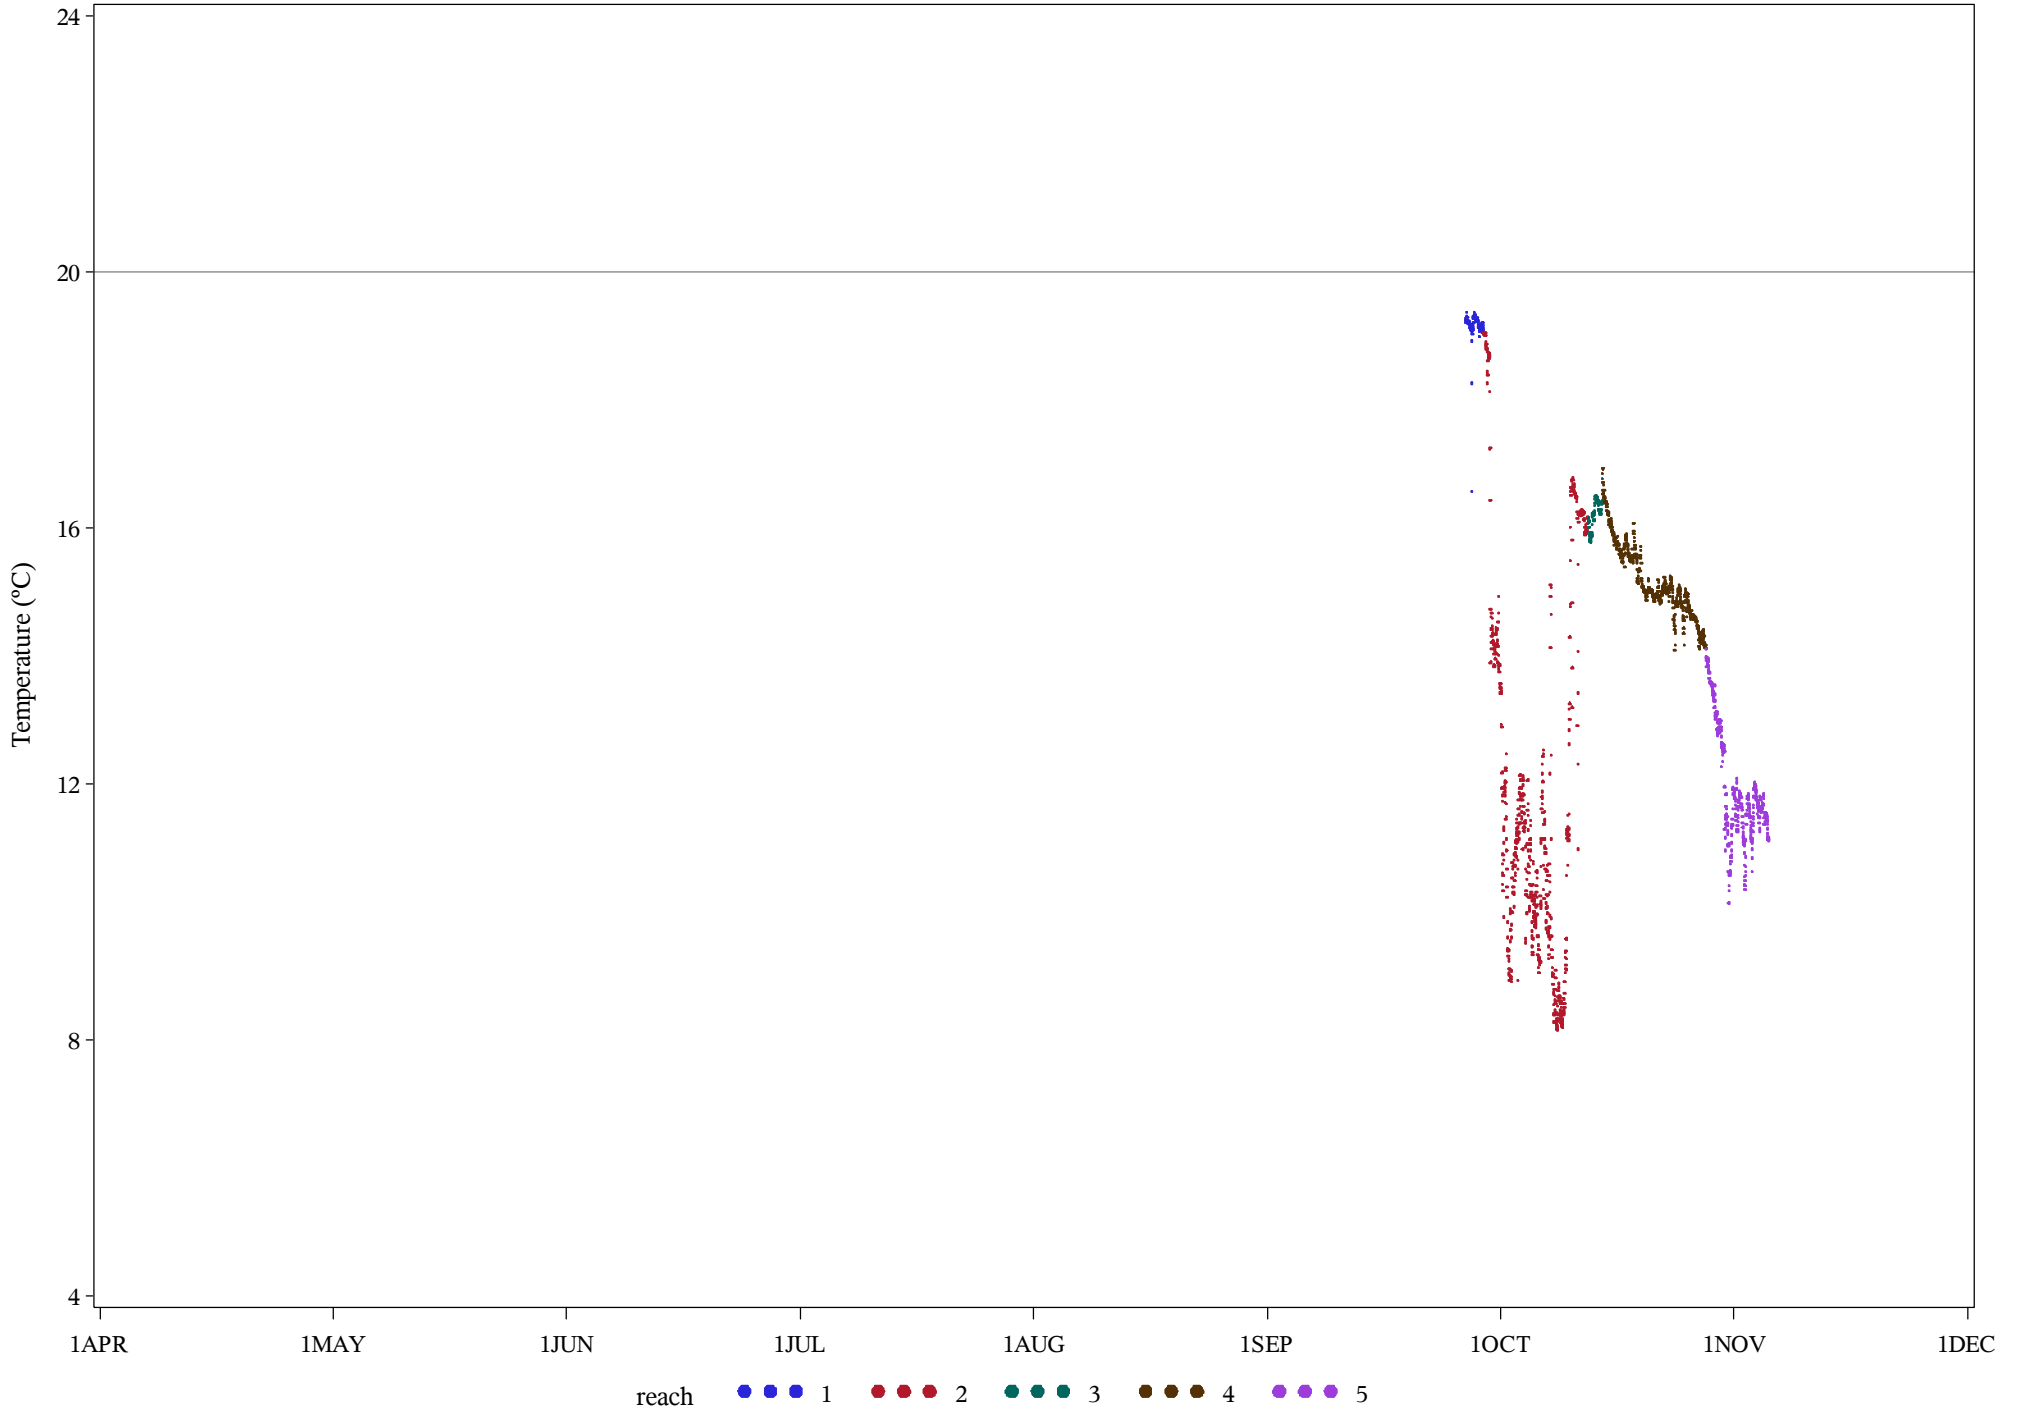

# Steelhead 4880B

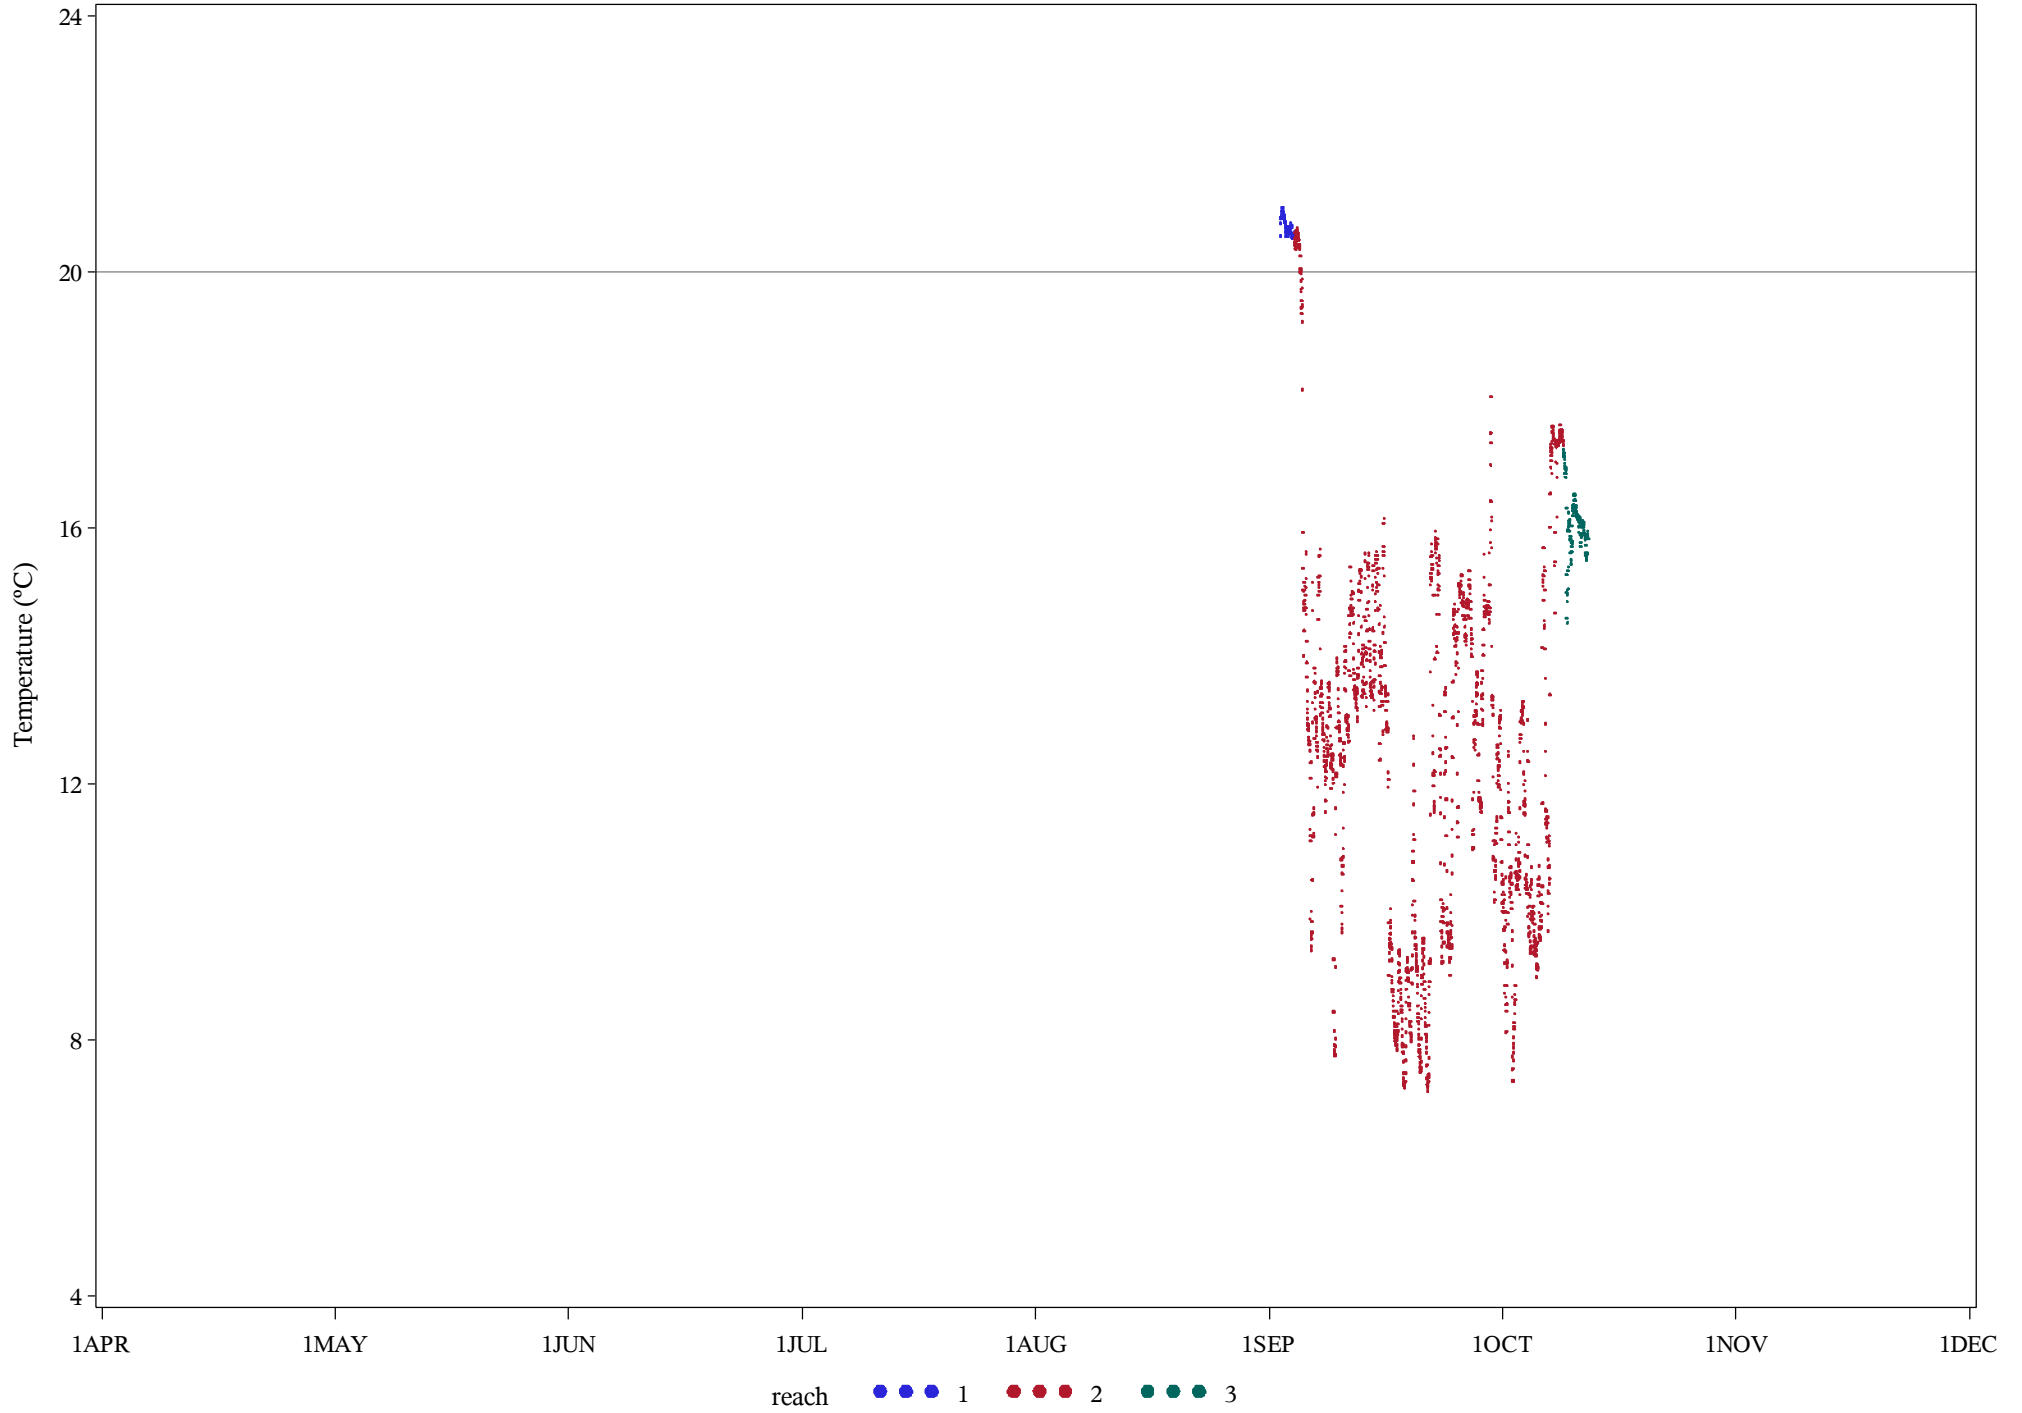

Steelhead  
4882B

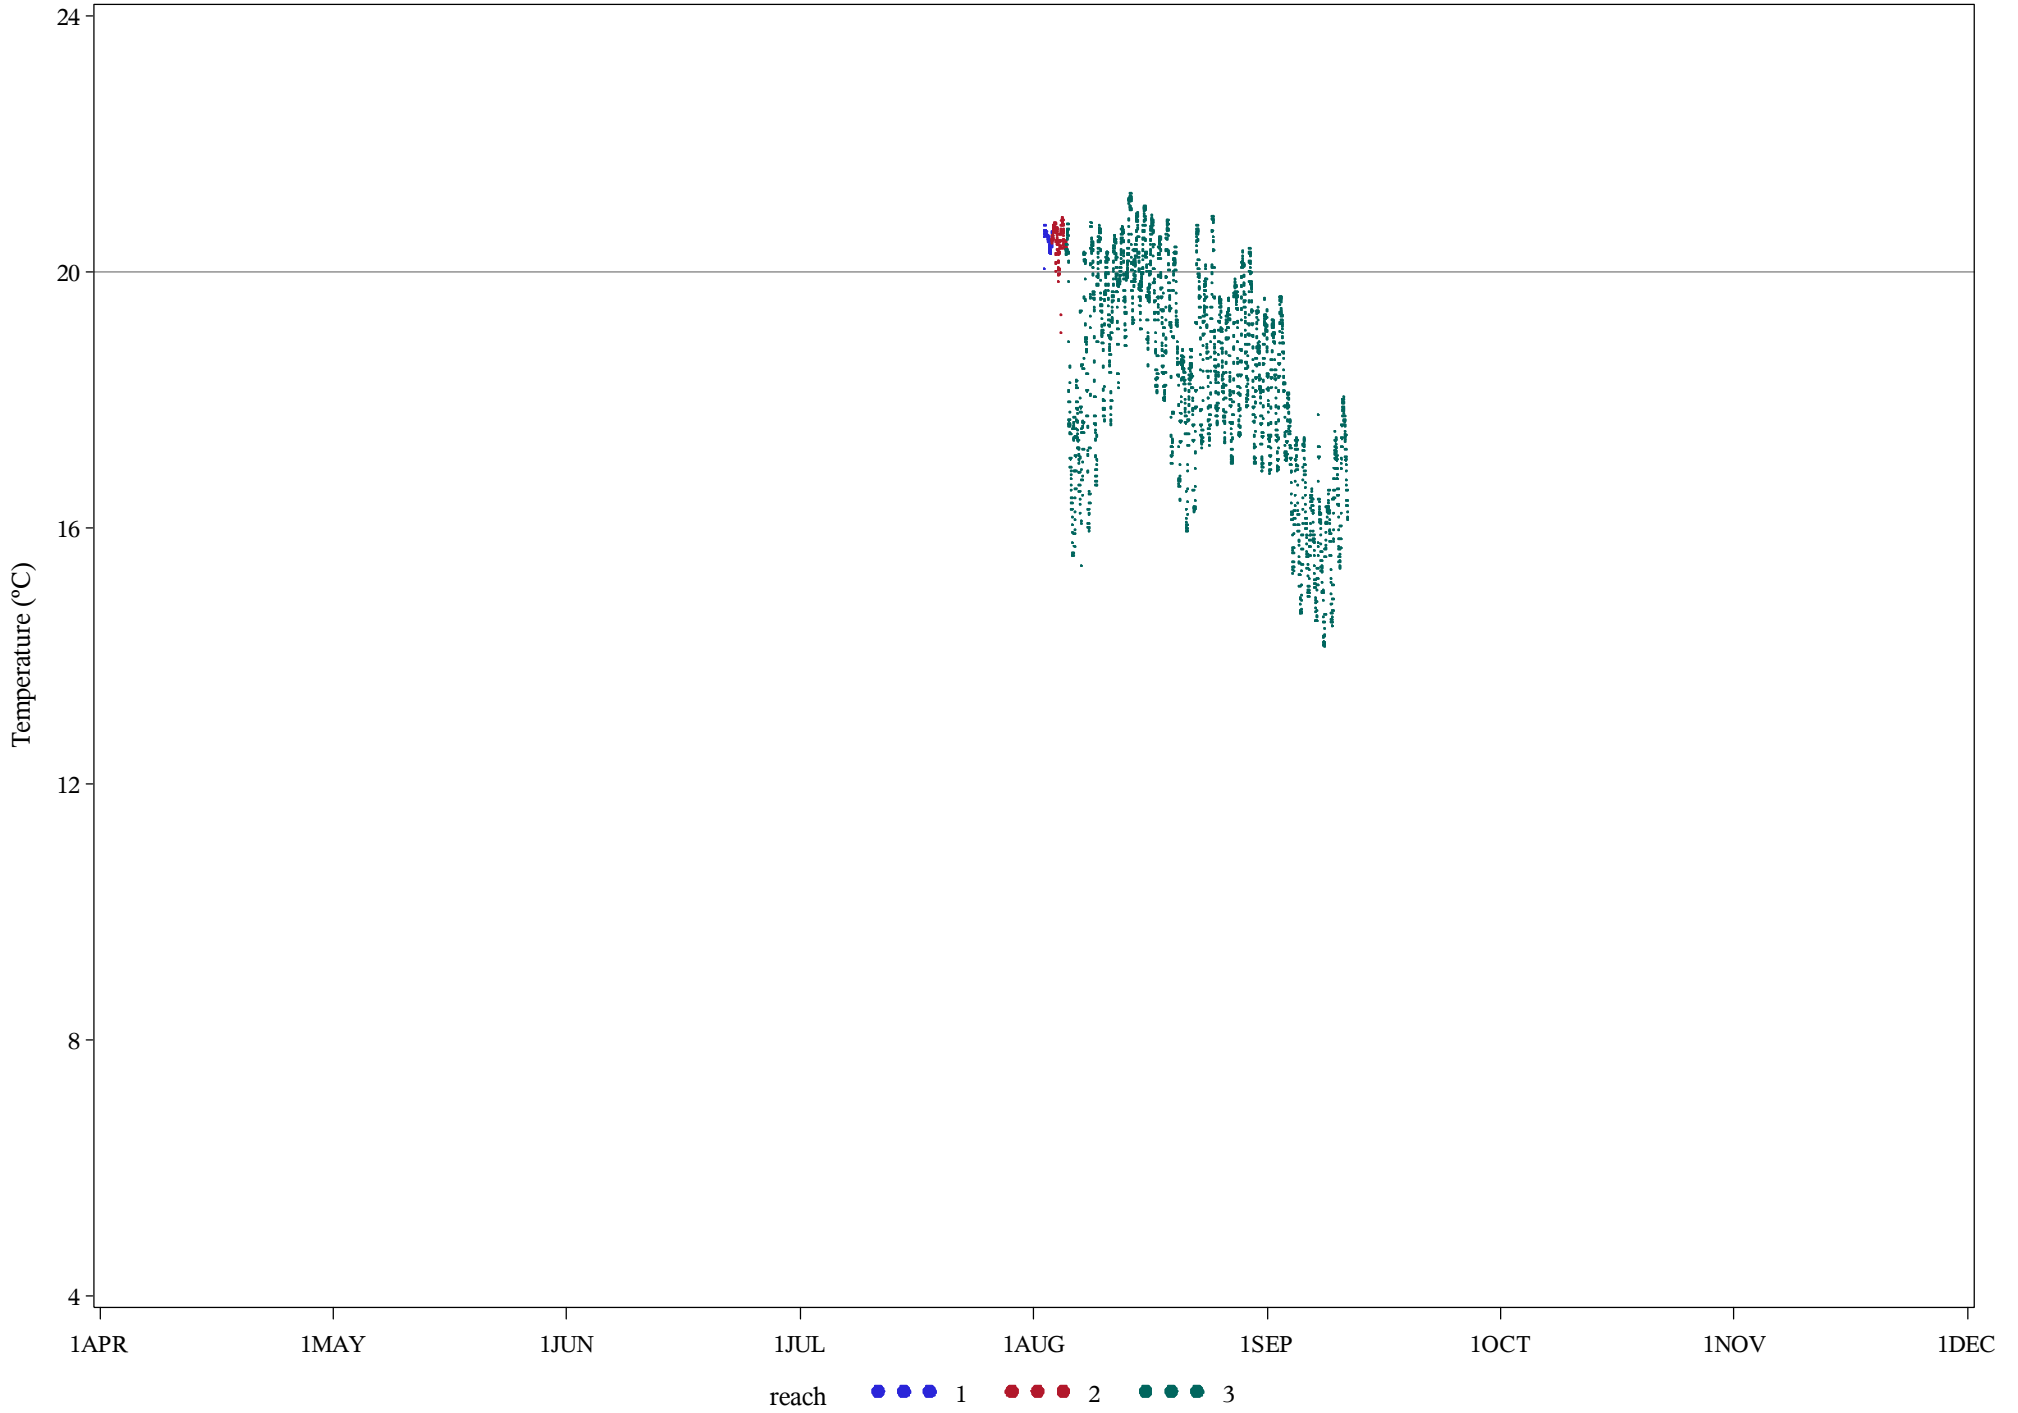

Steelhead  
4885B

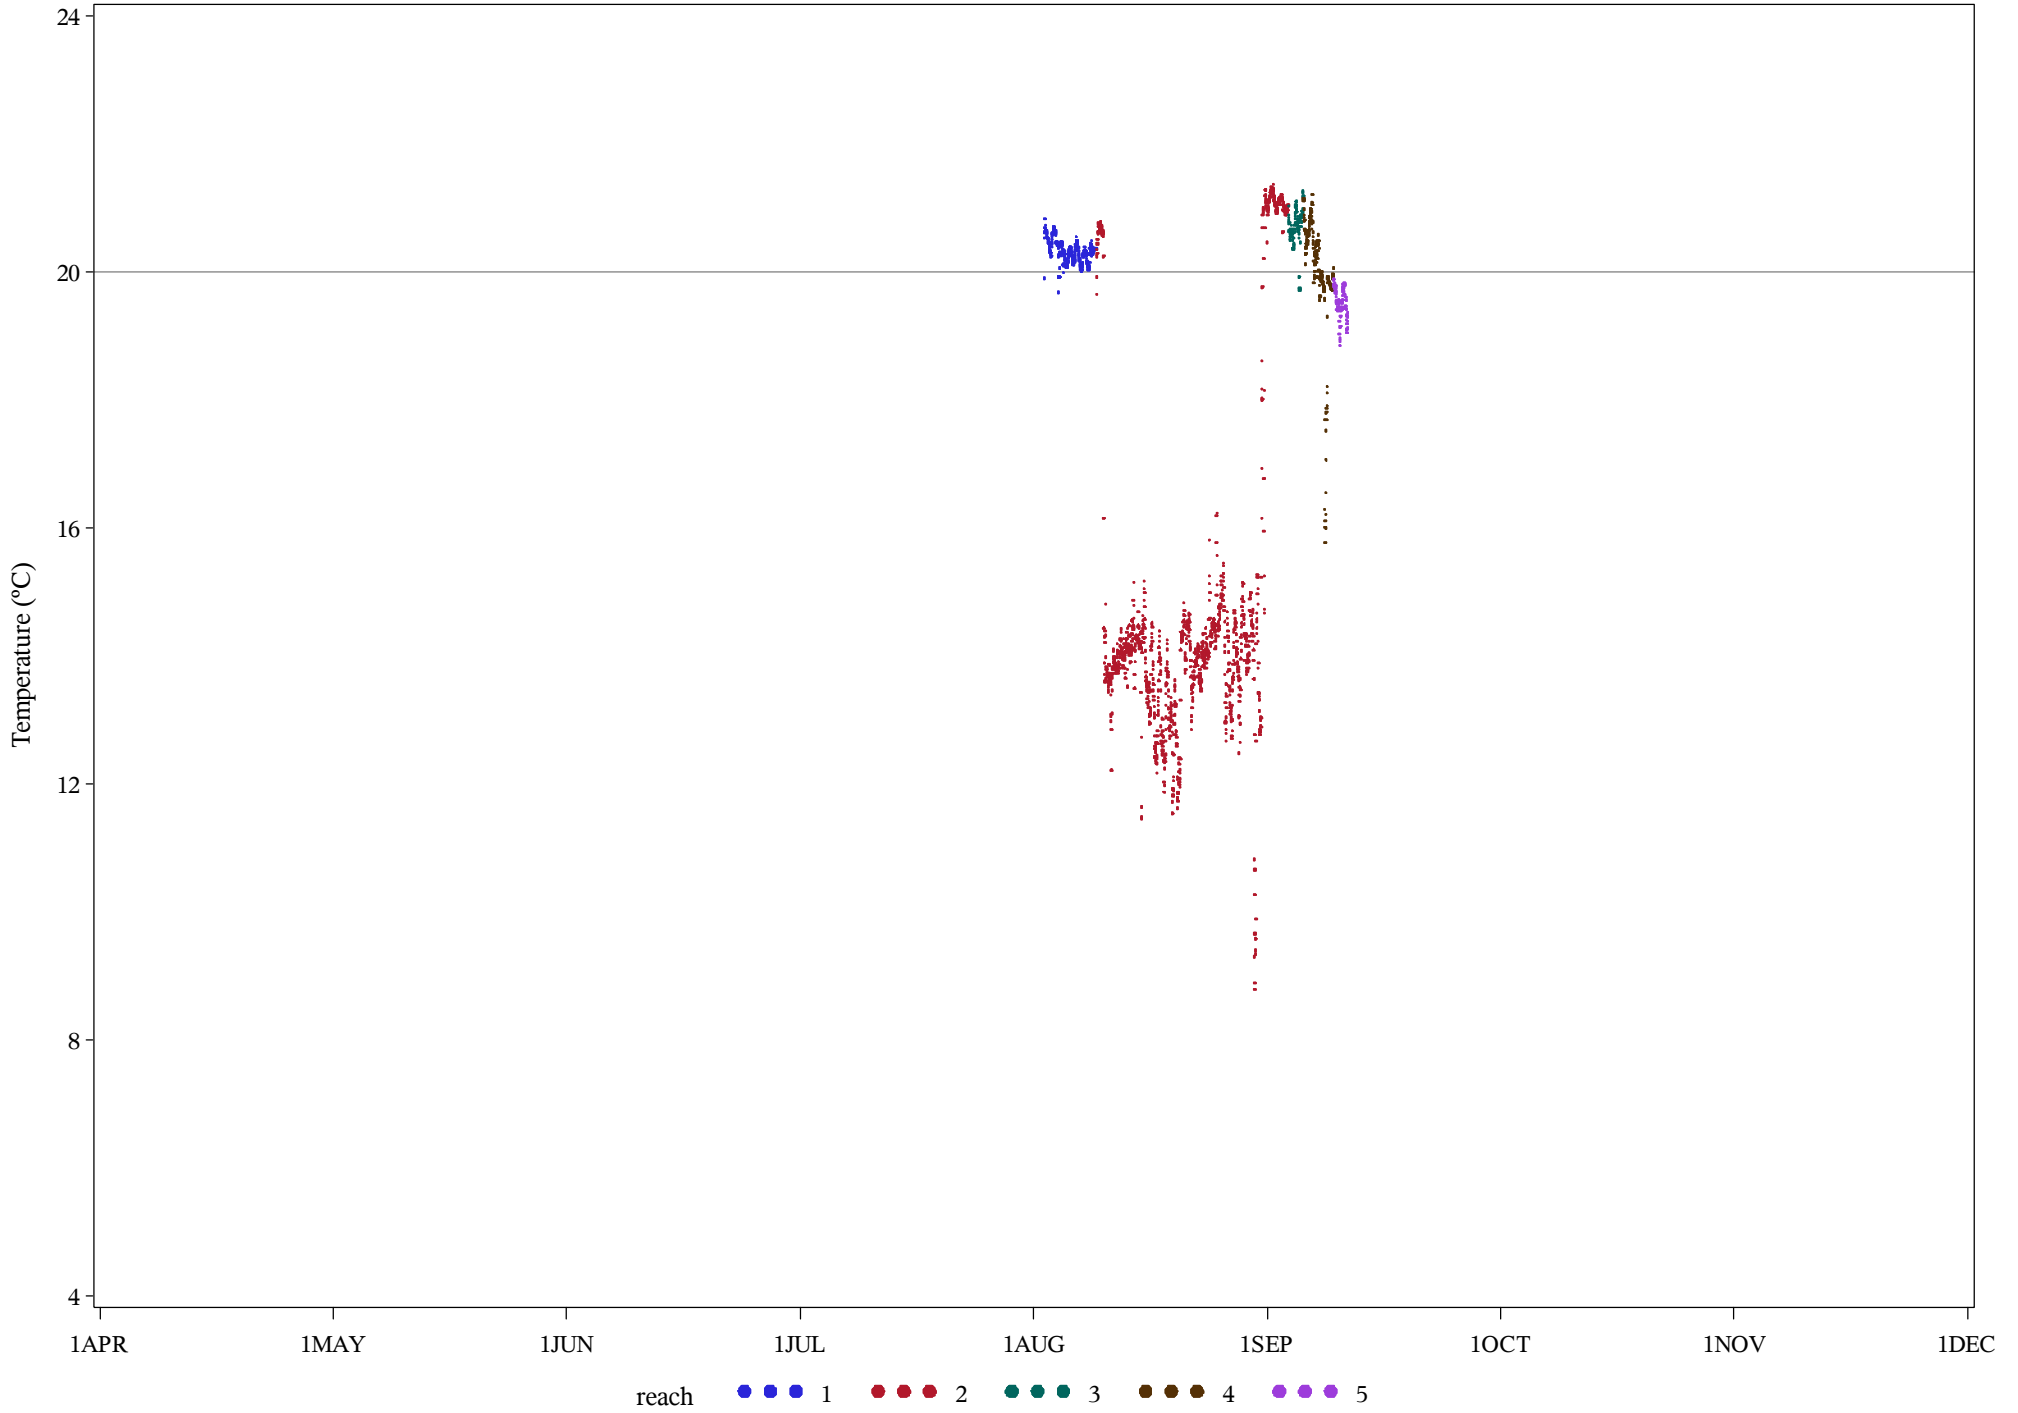

# Steelhead 4886B

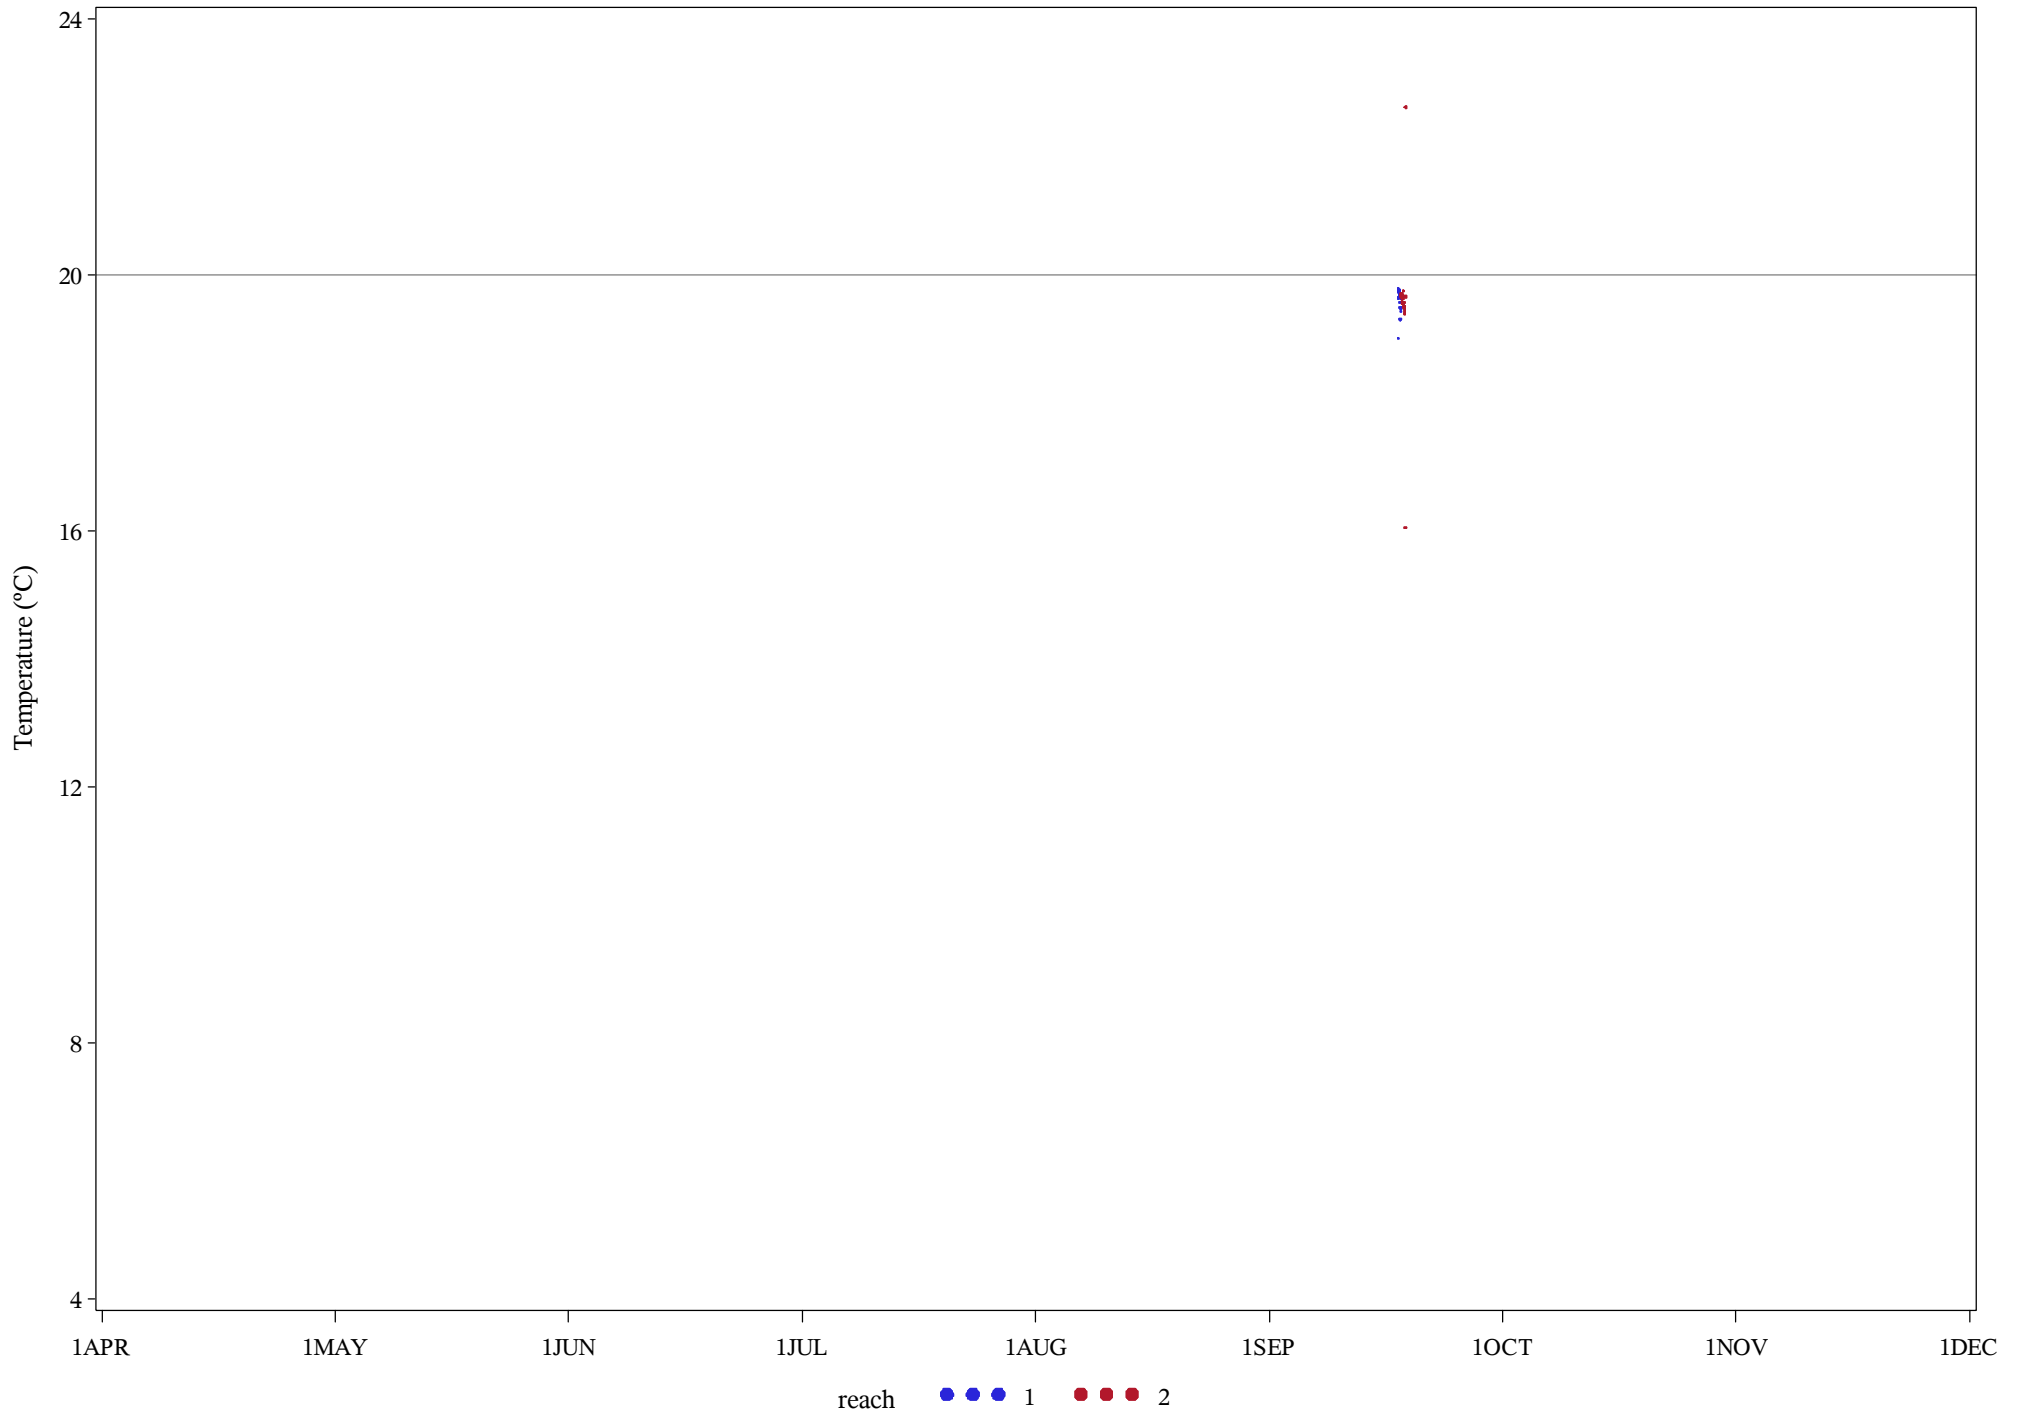

# Steelhead 4886C

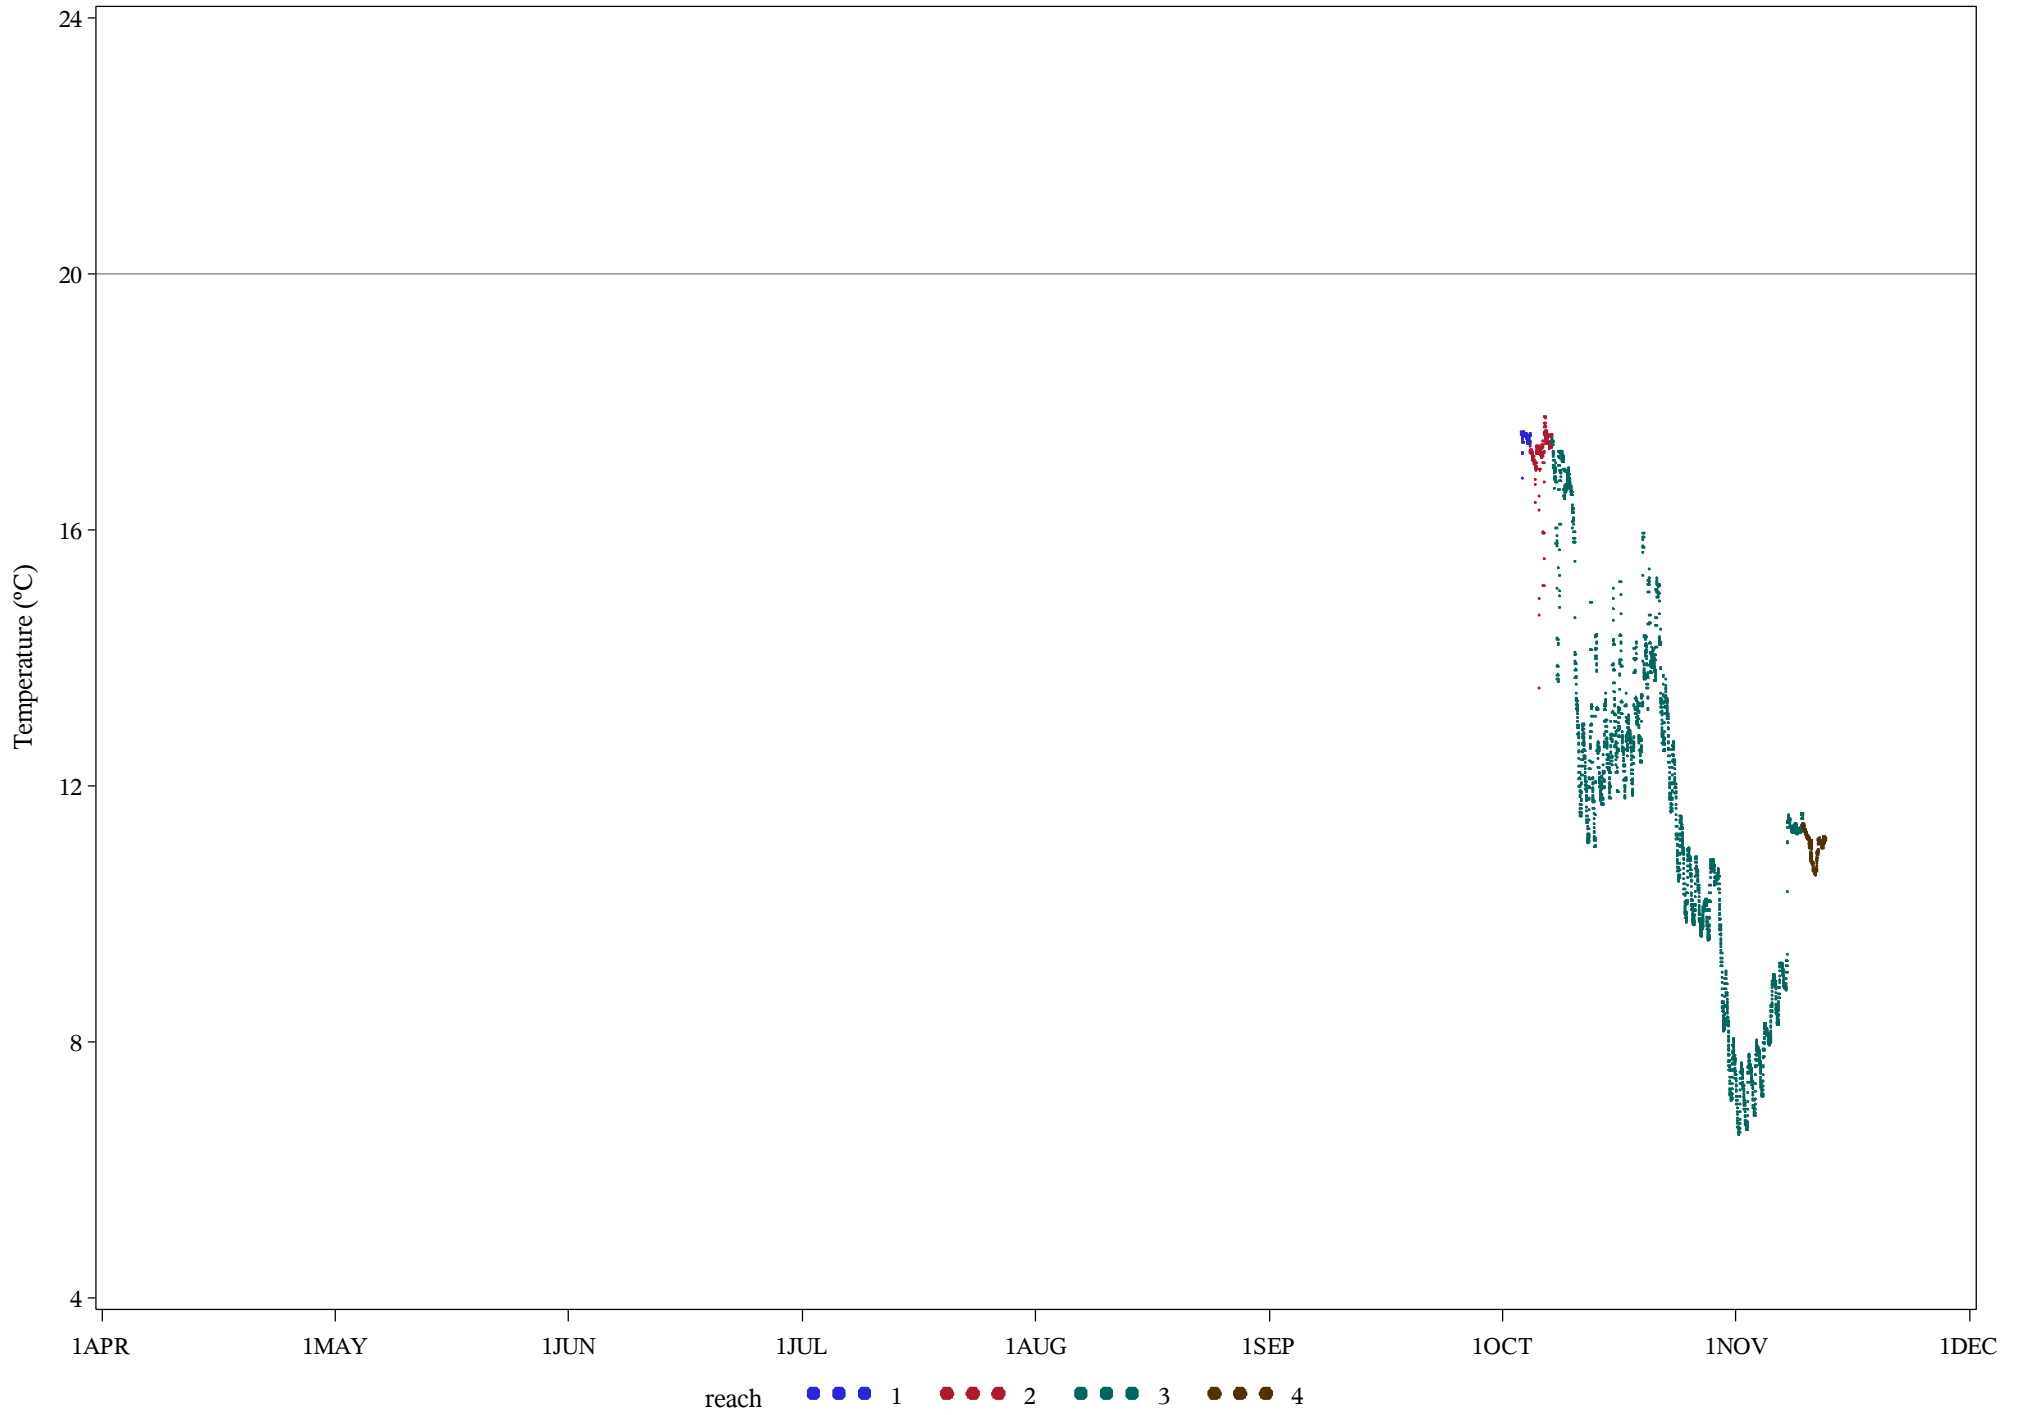

**Steelhead  
4887B**

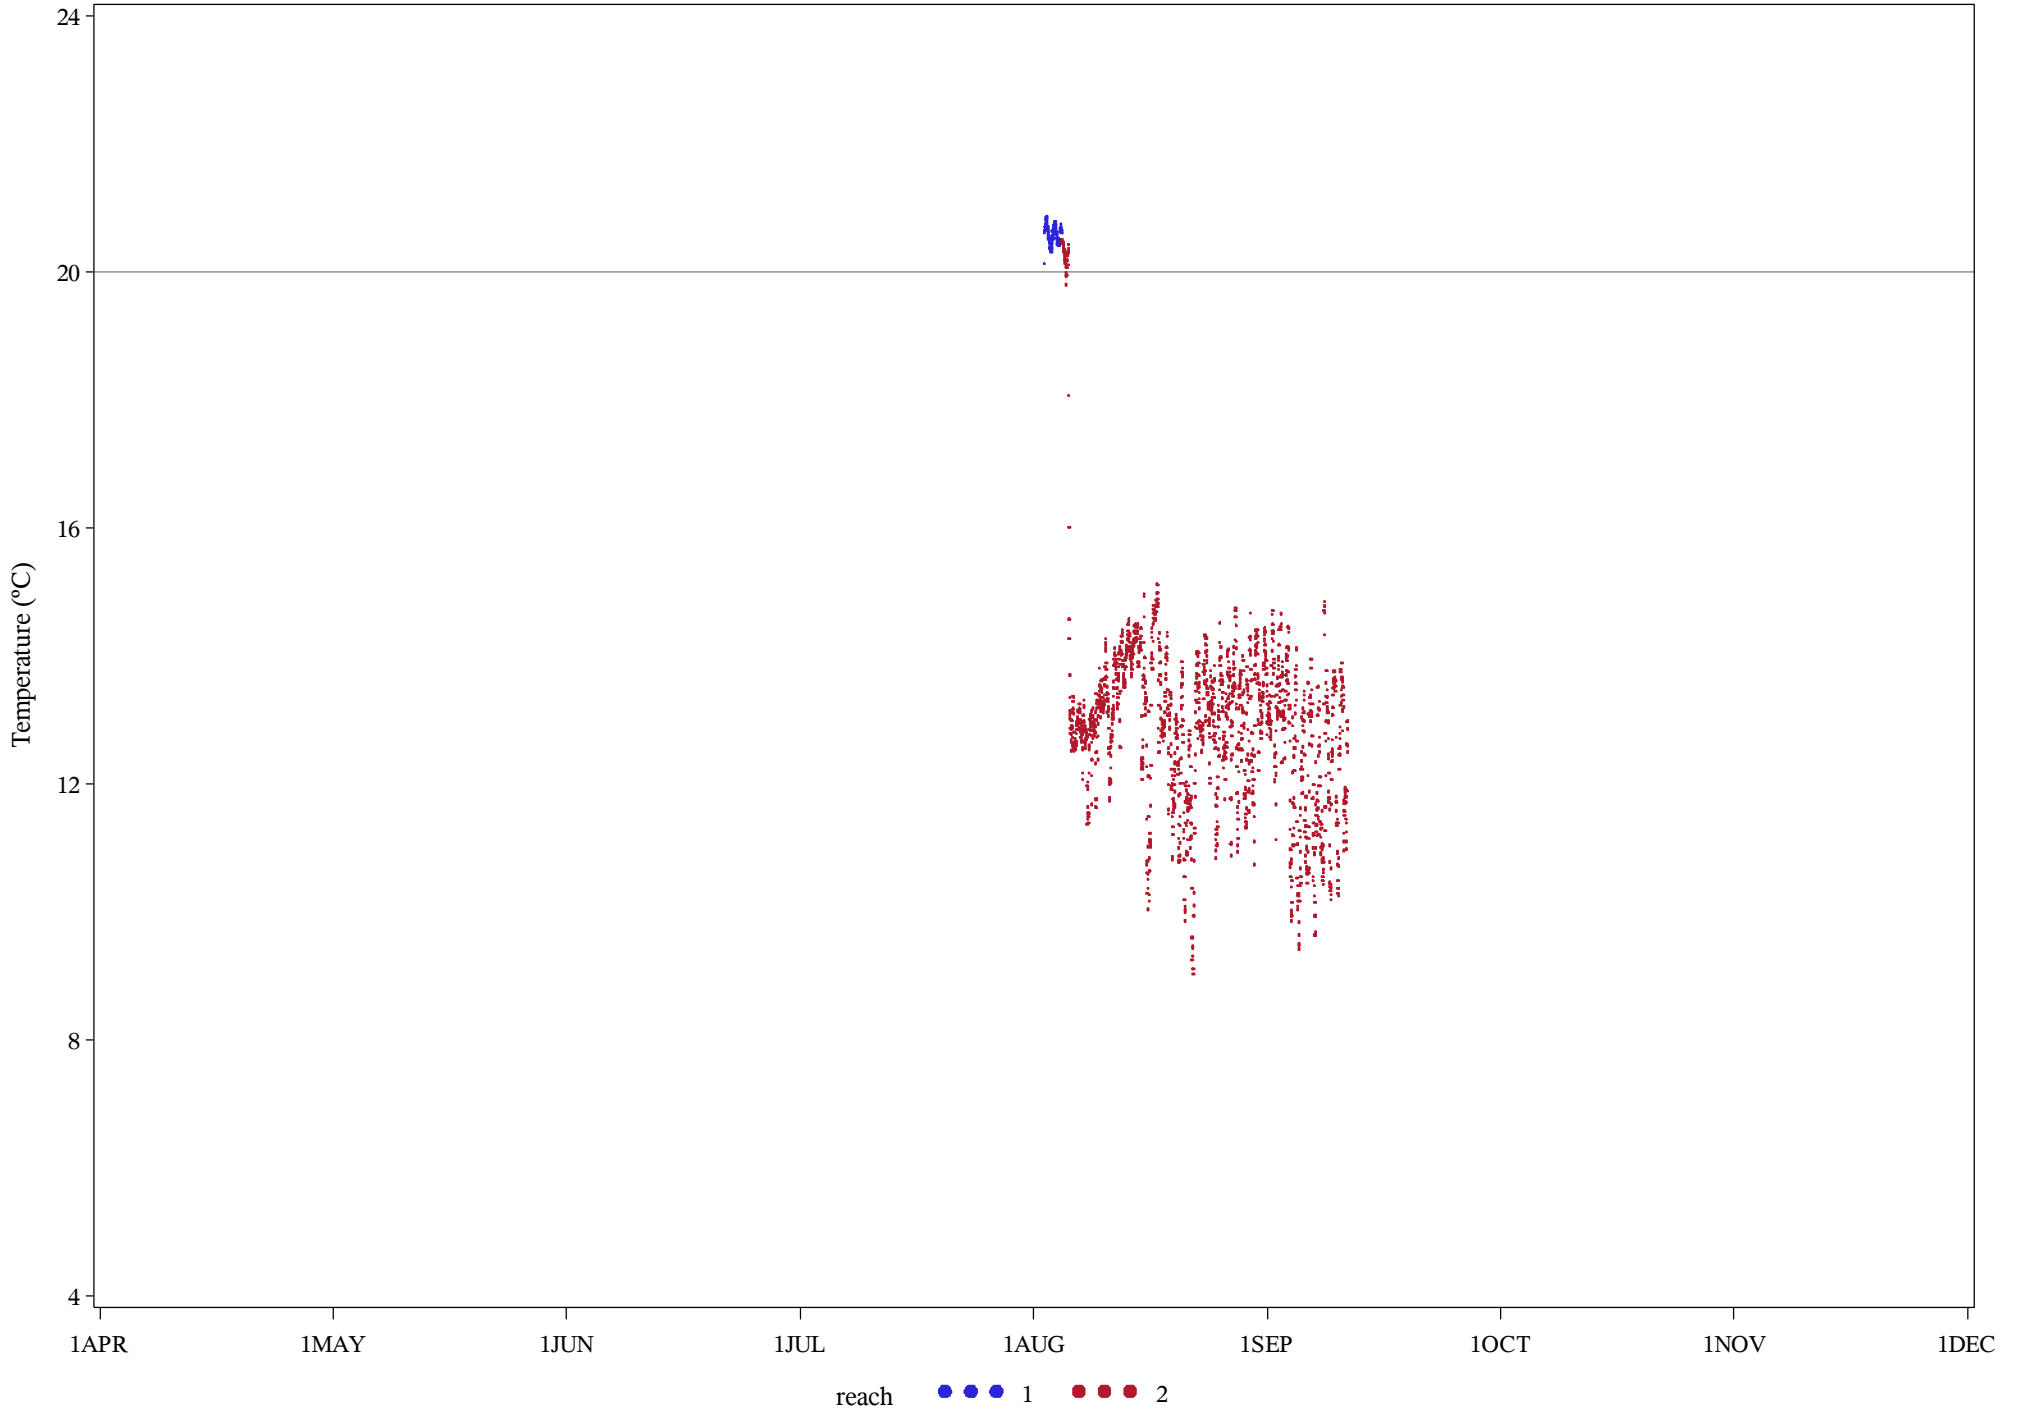



# Steelhead 4891B

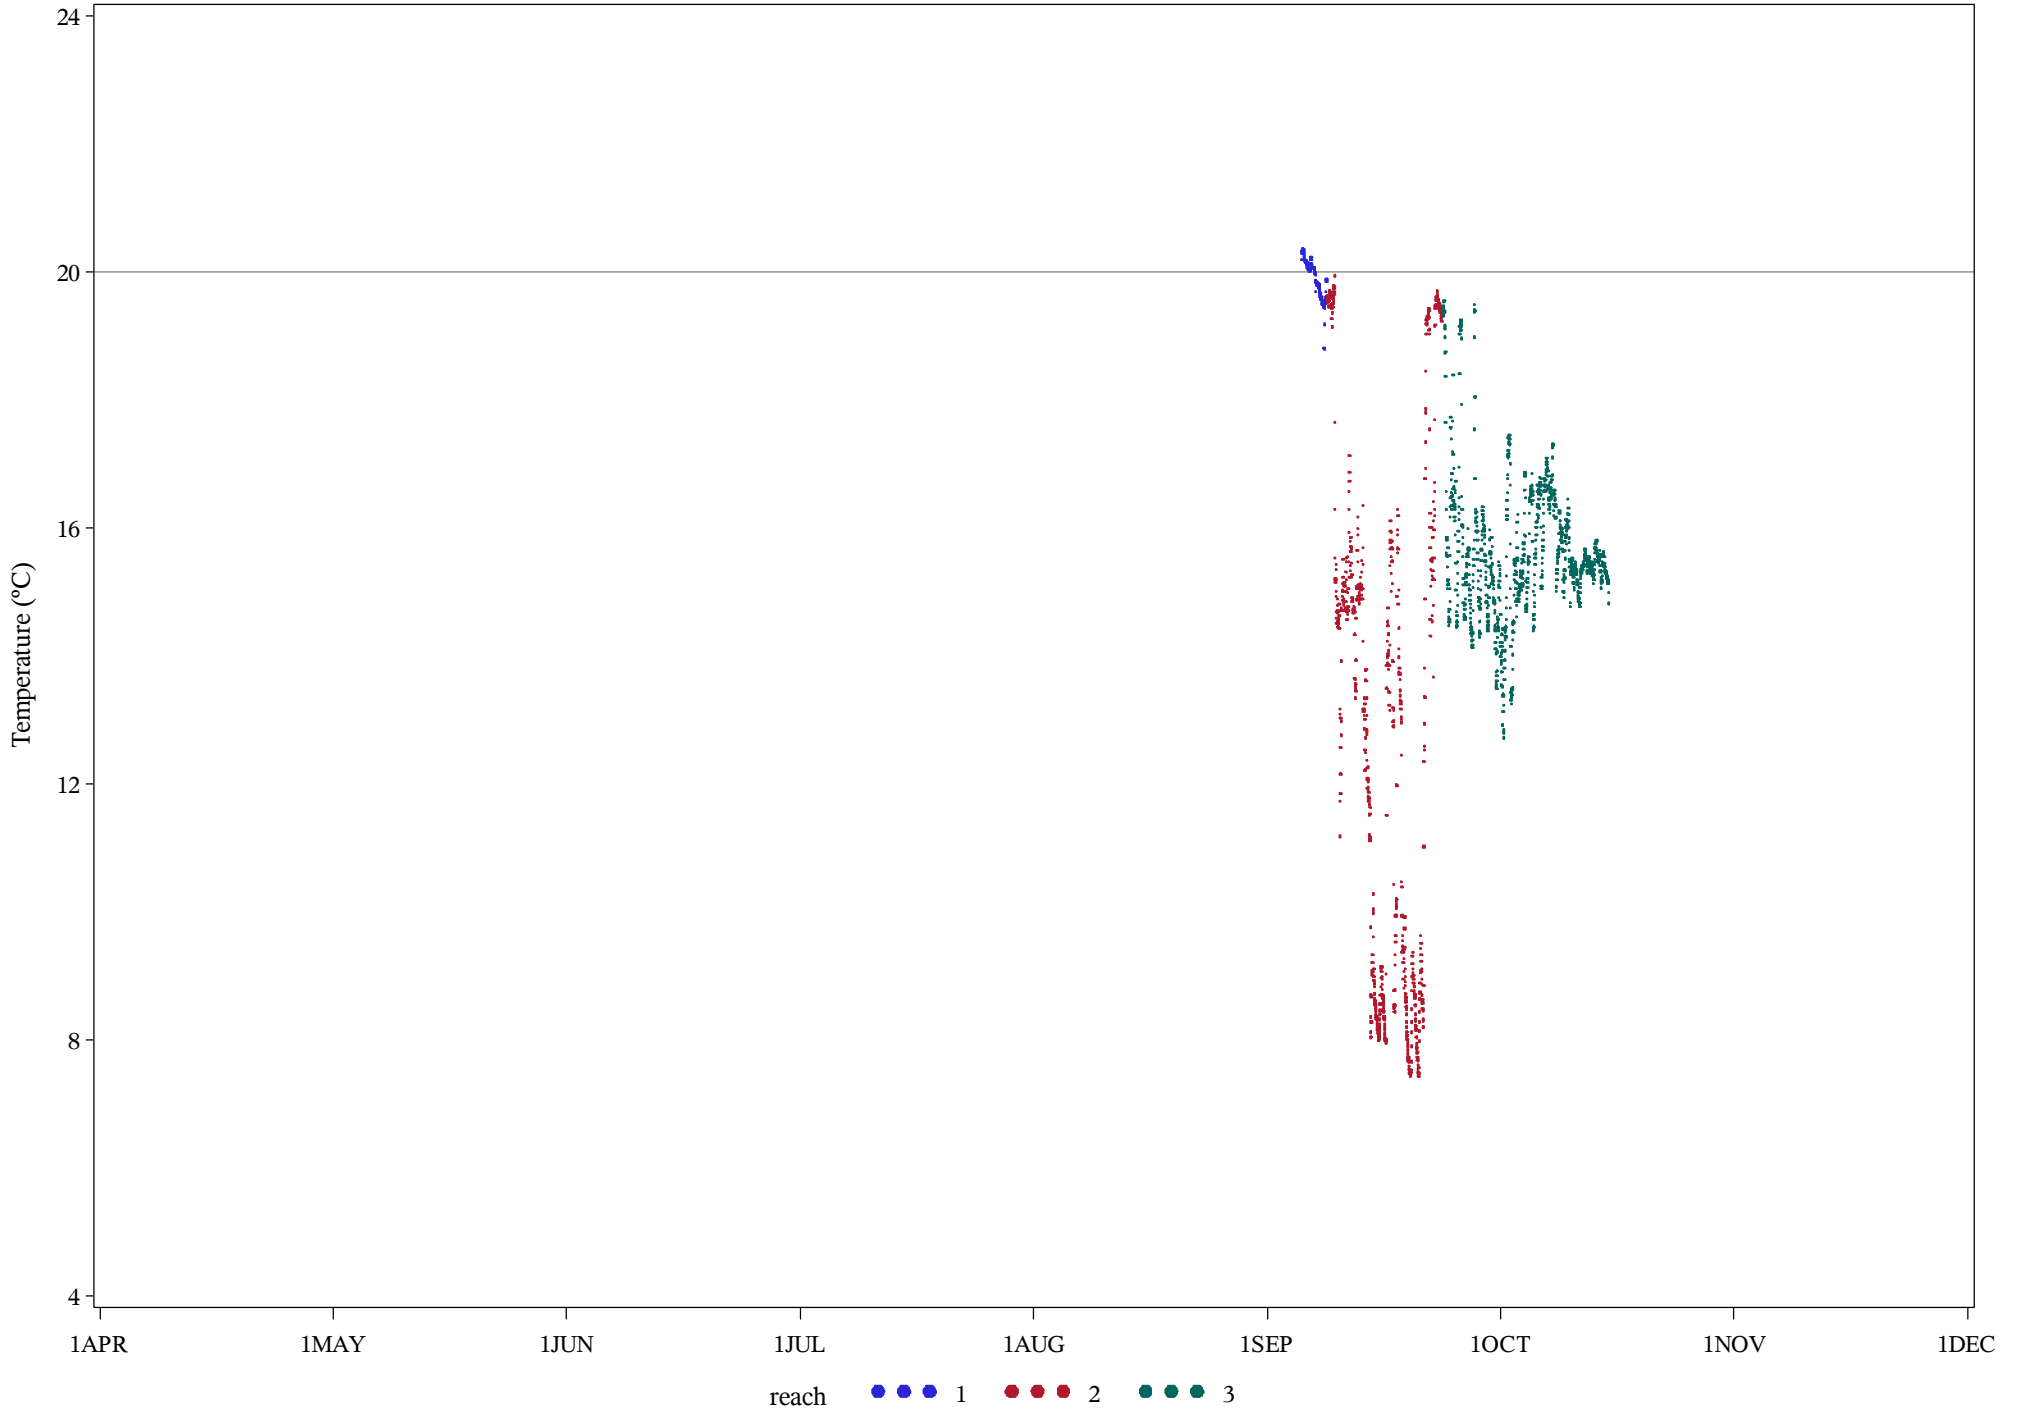

# Steelhead 4893B

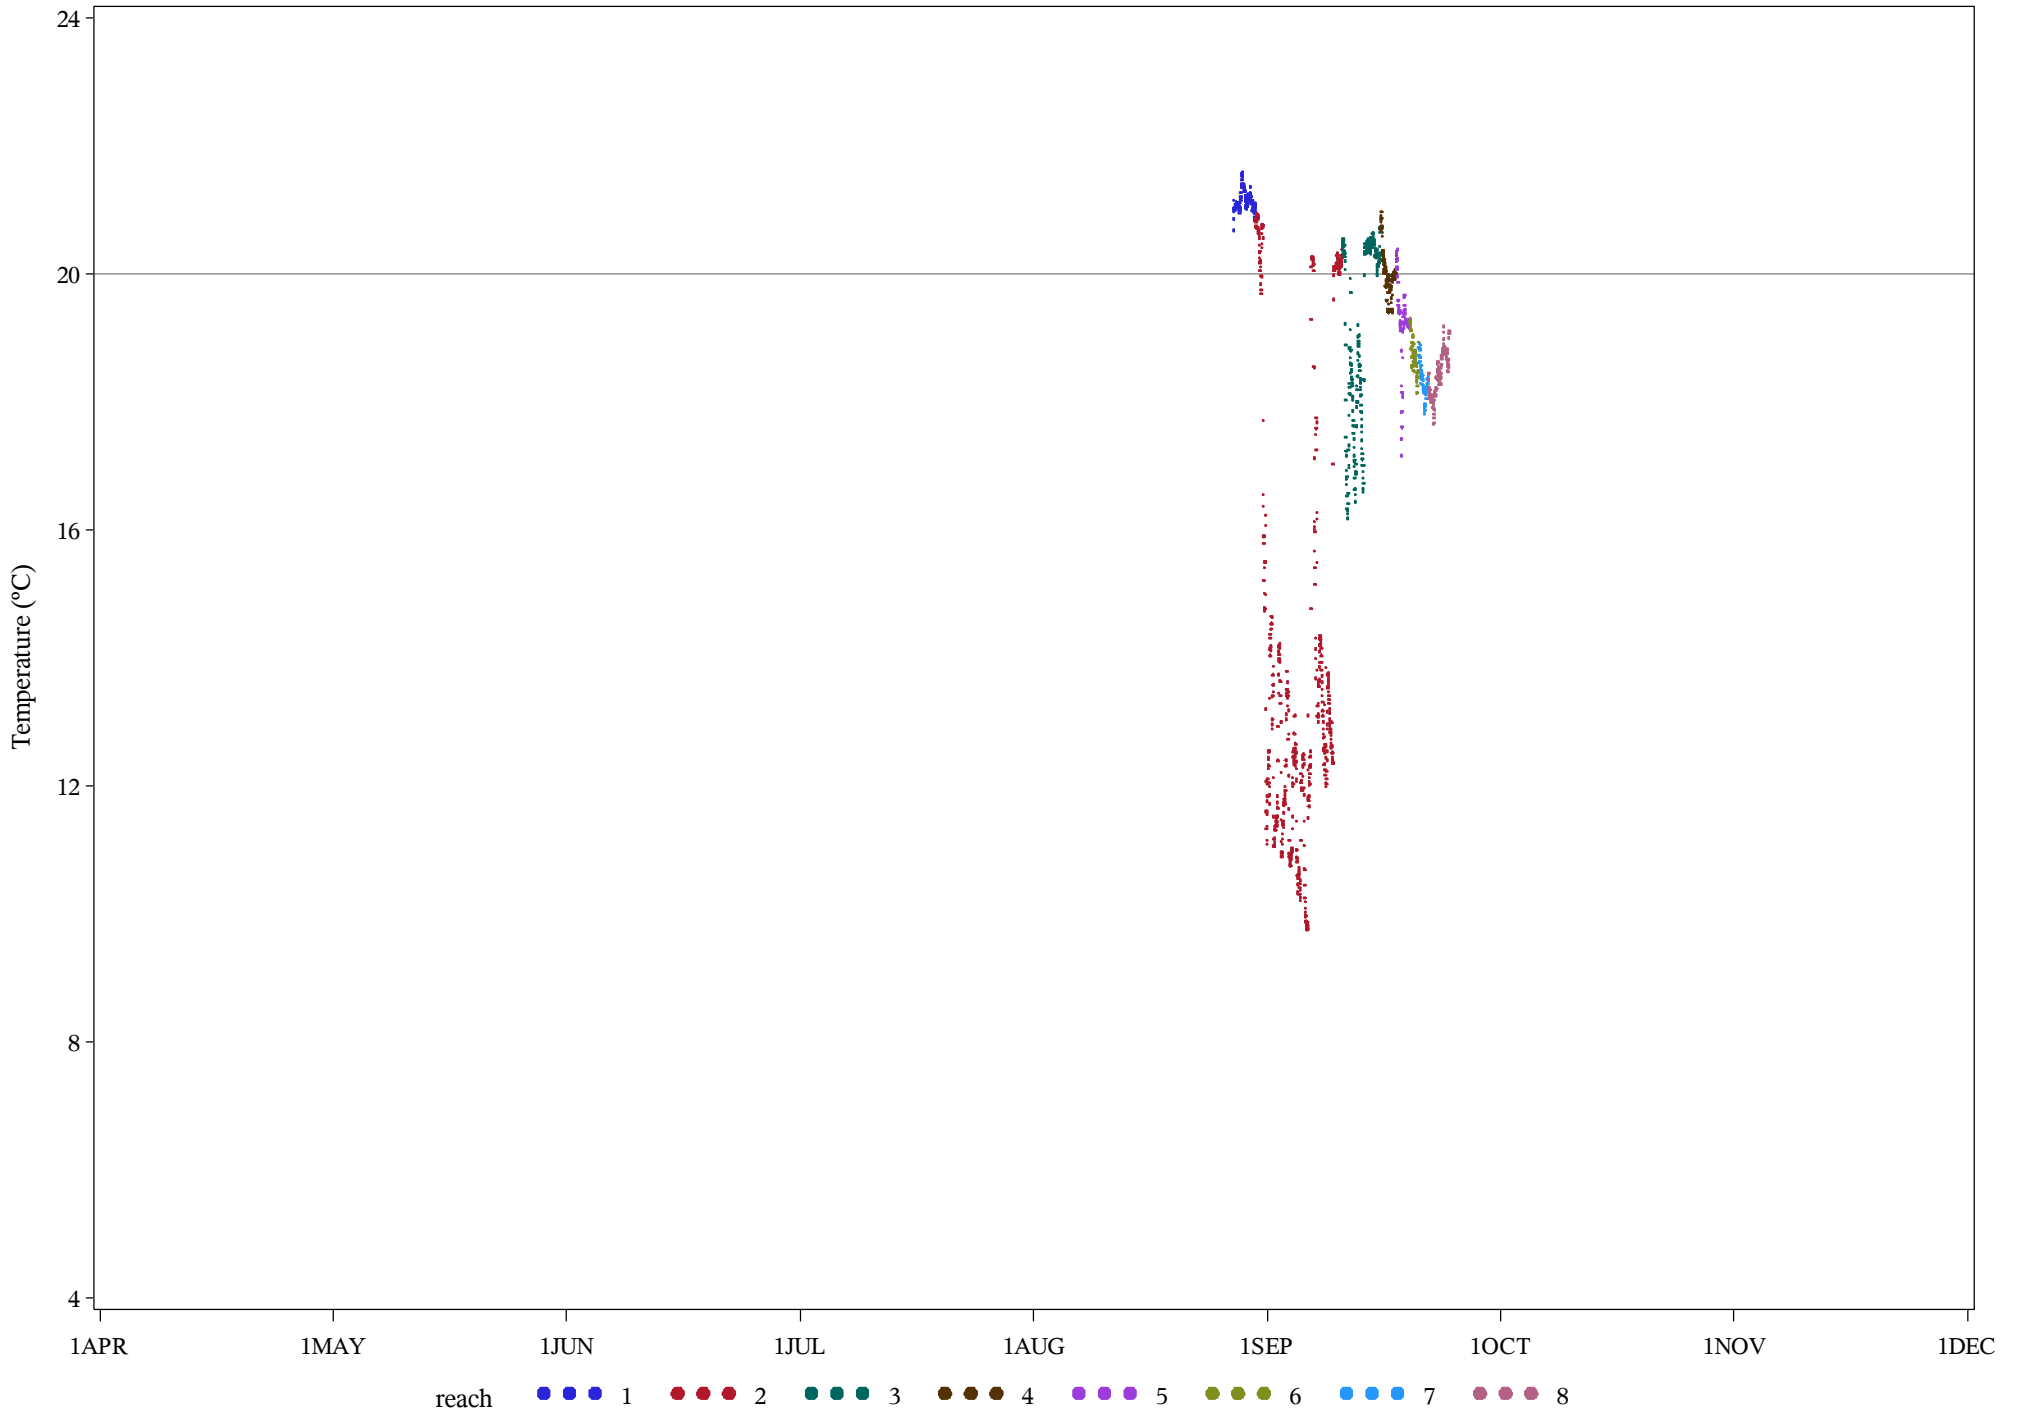



# Steelhead 4897B

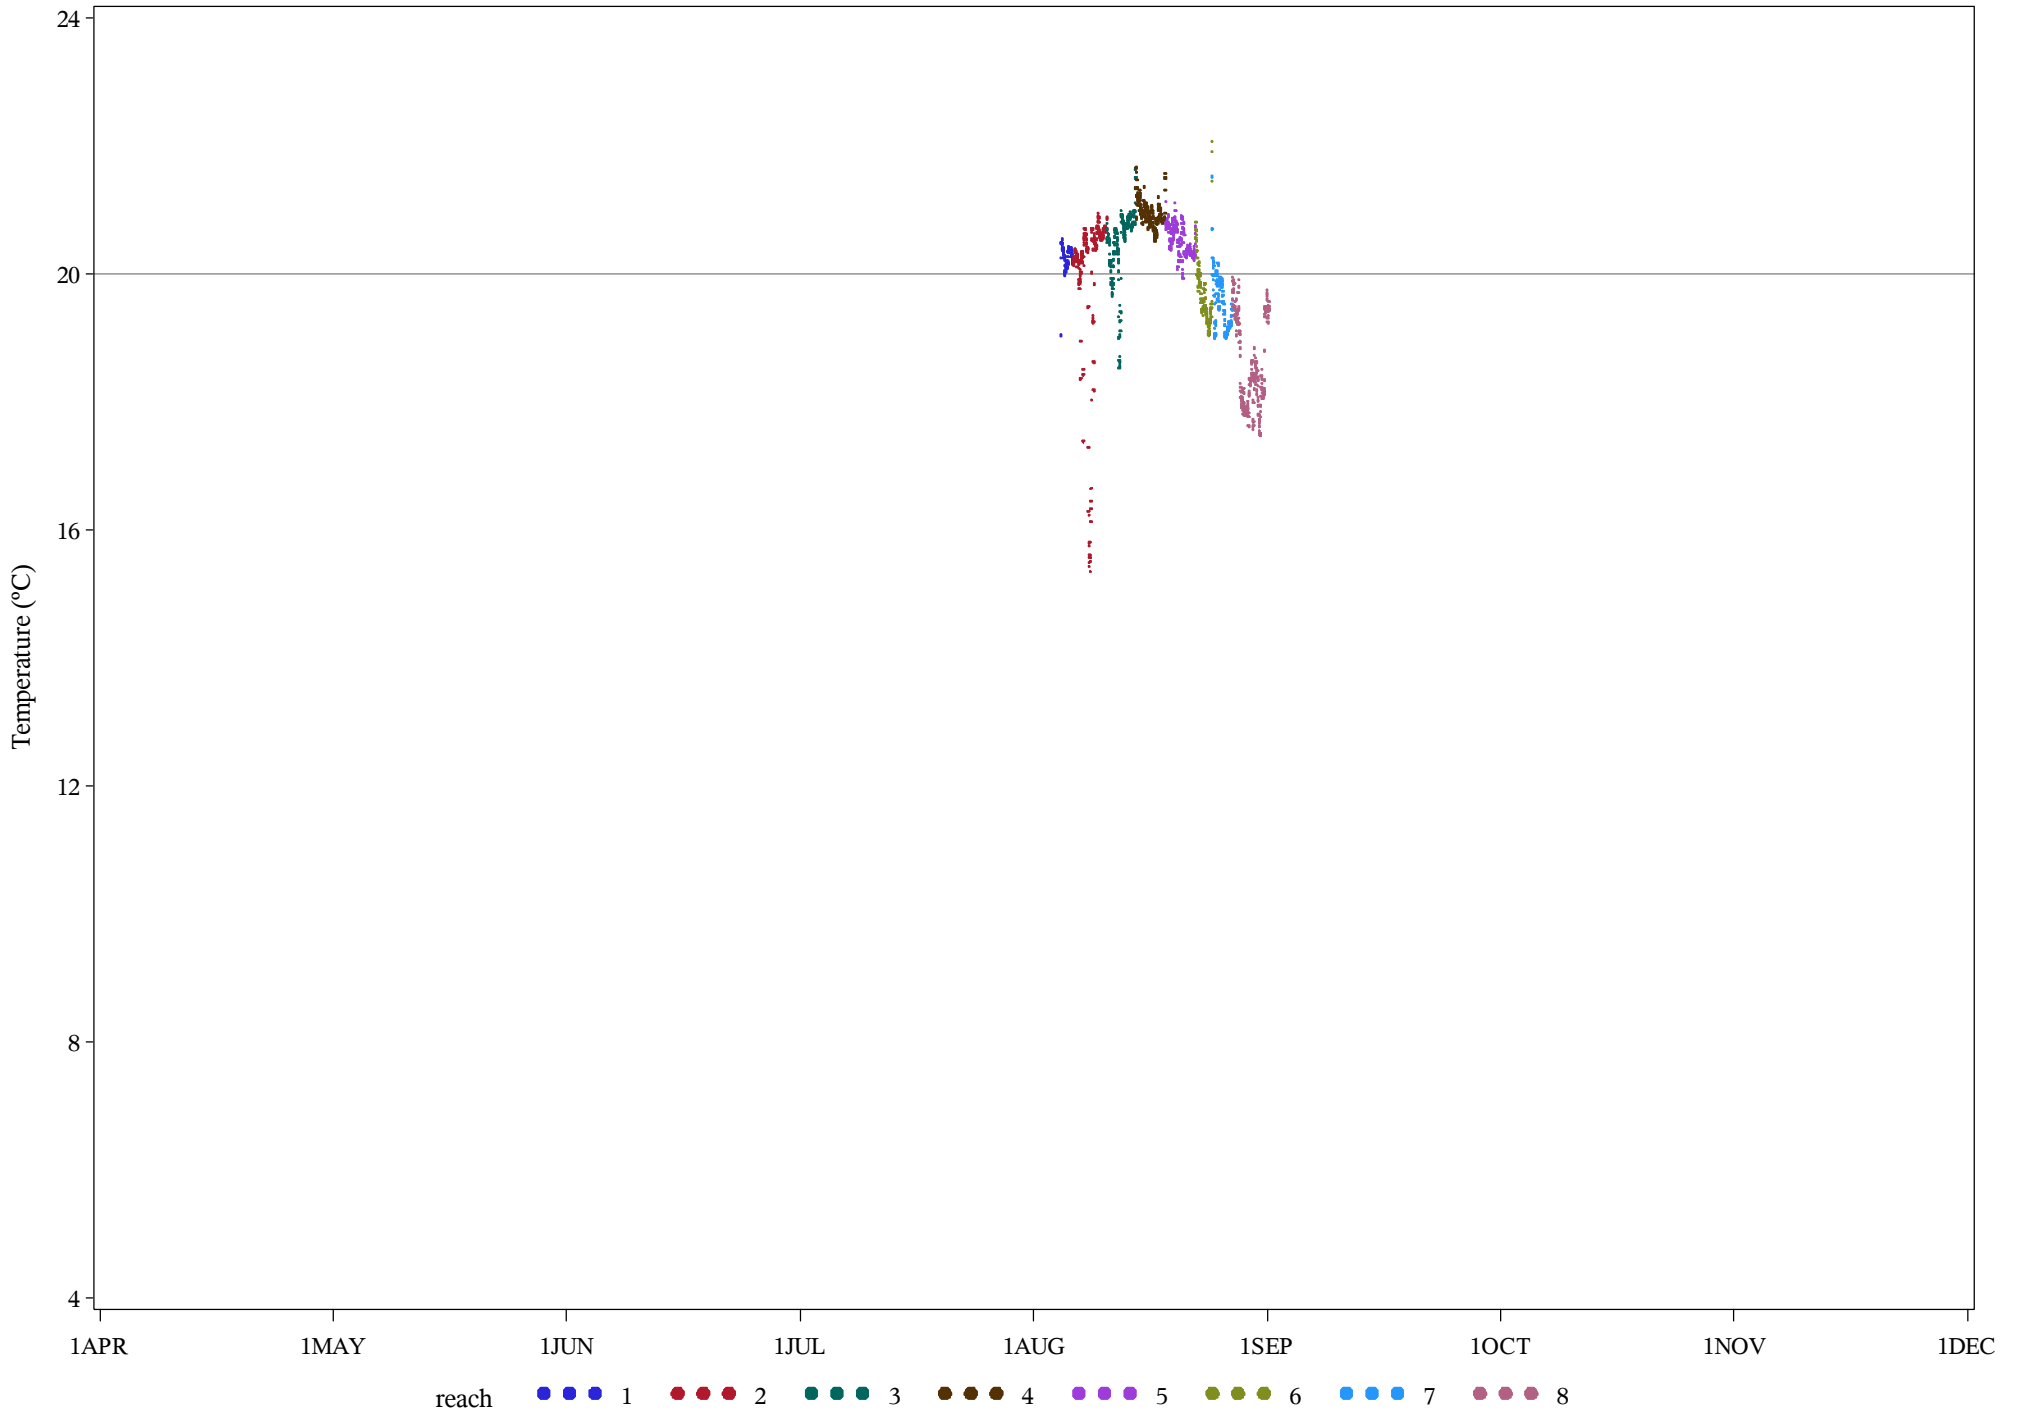

# Steelhead 4897C

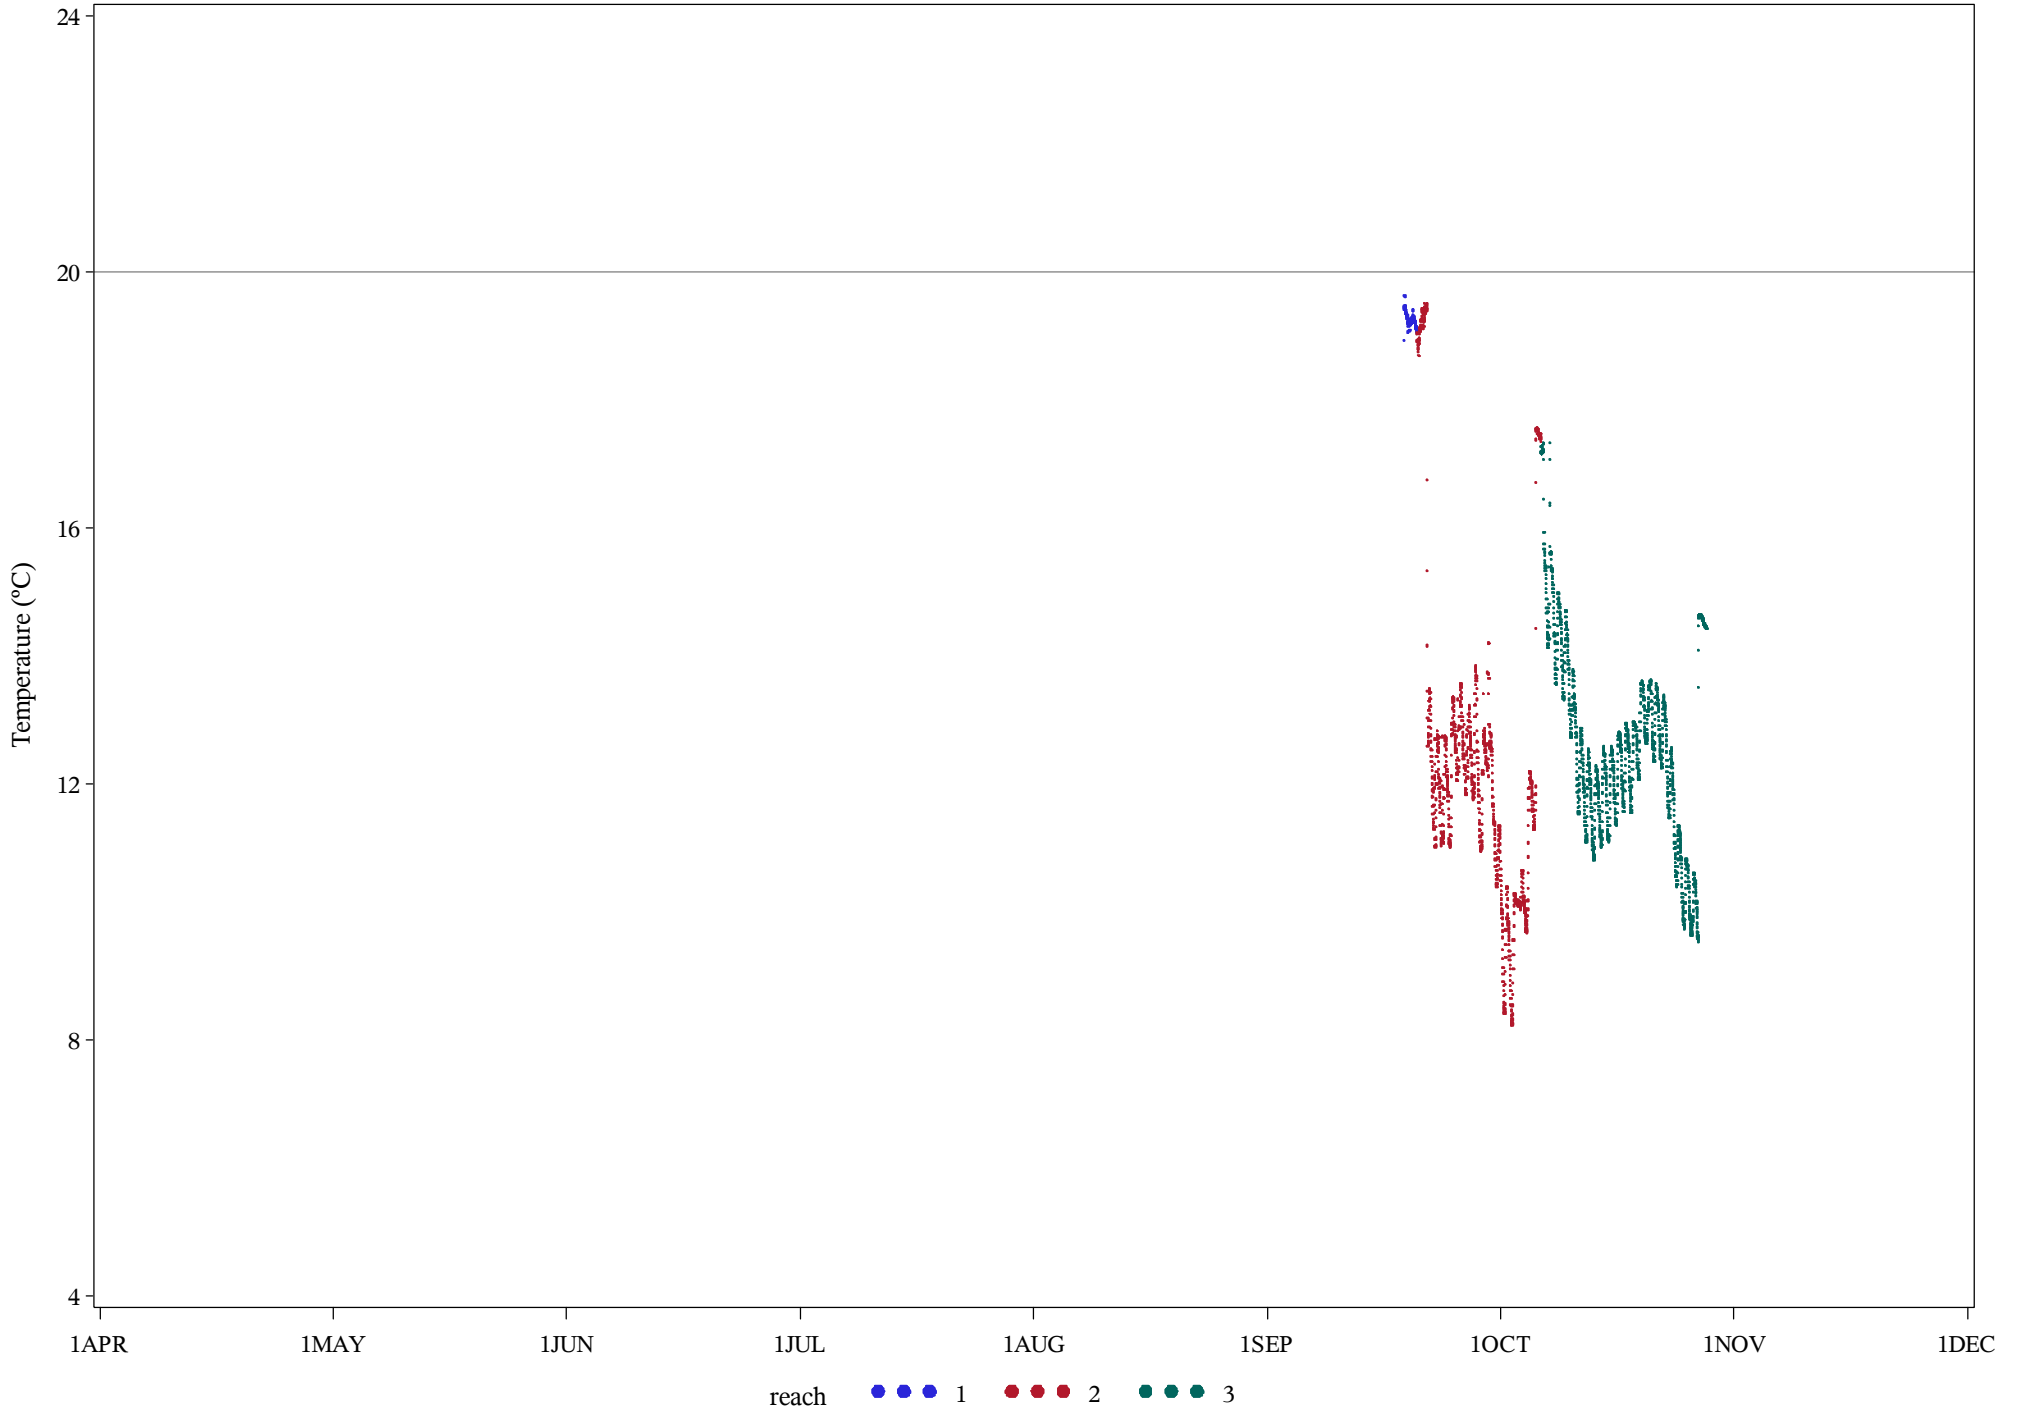

# Steelhead 4906B

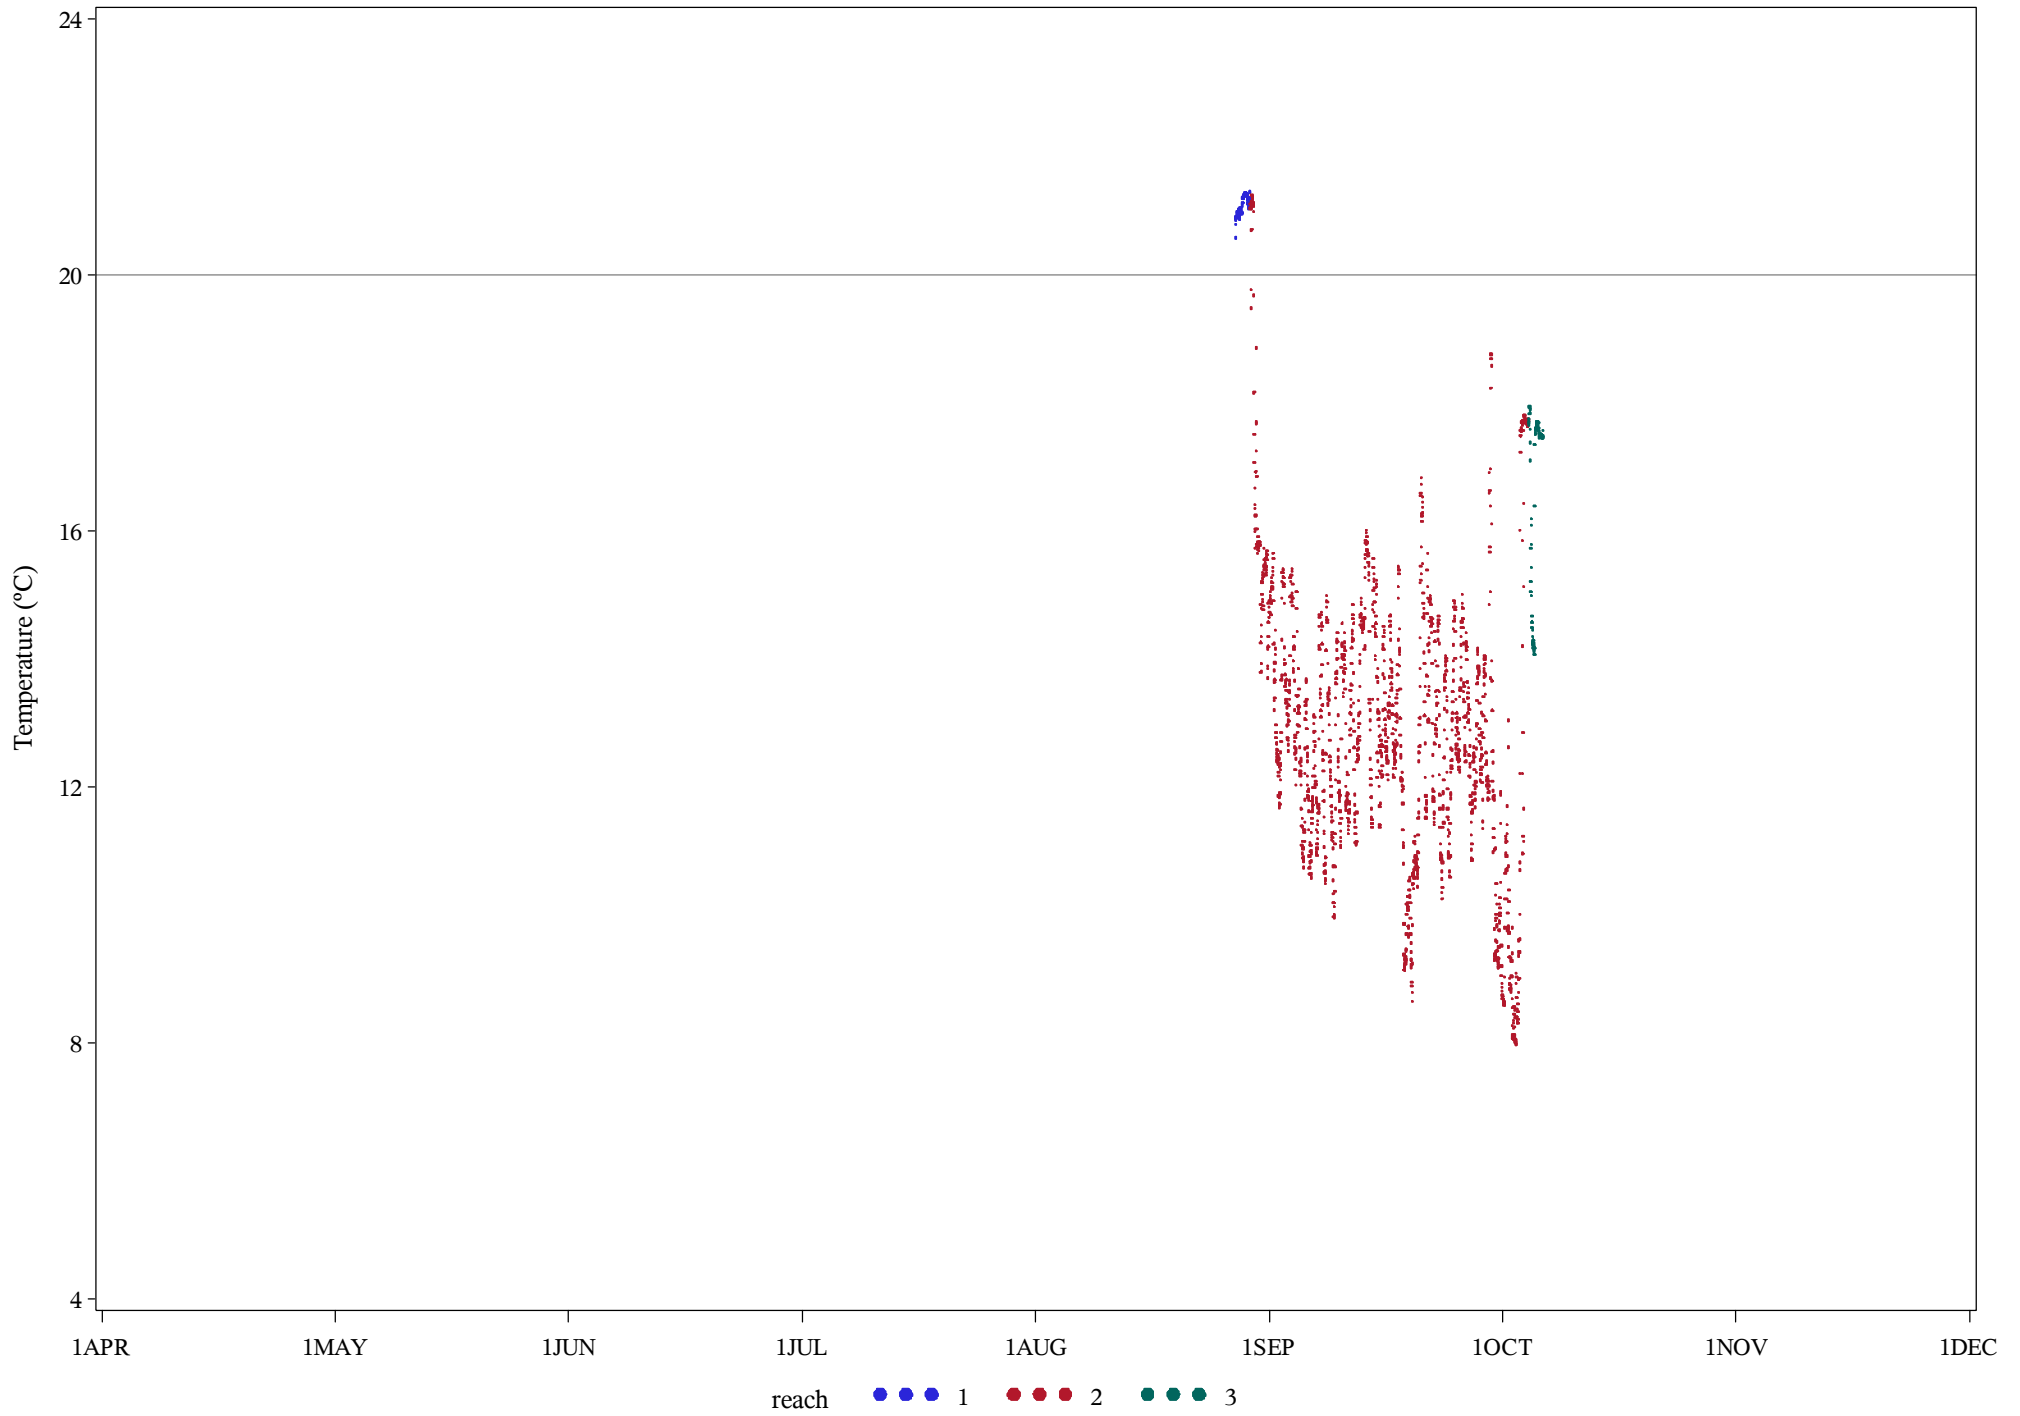

# Steelhead 4909B

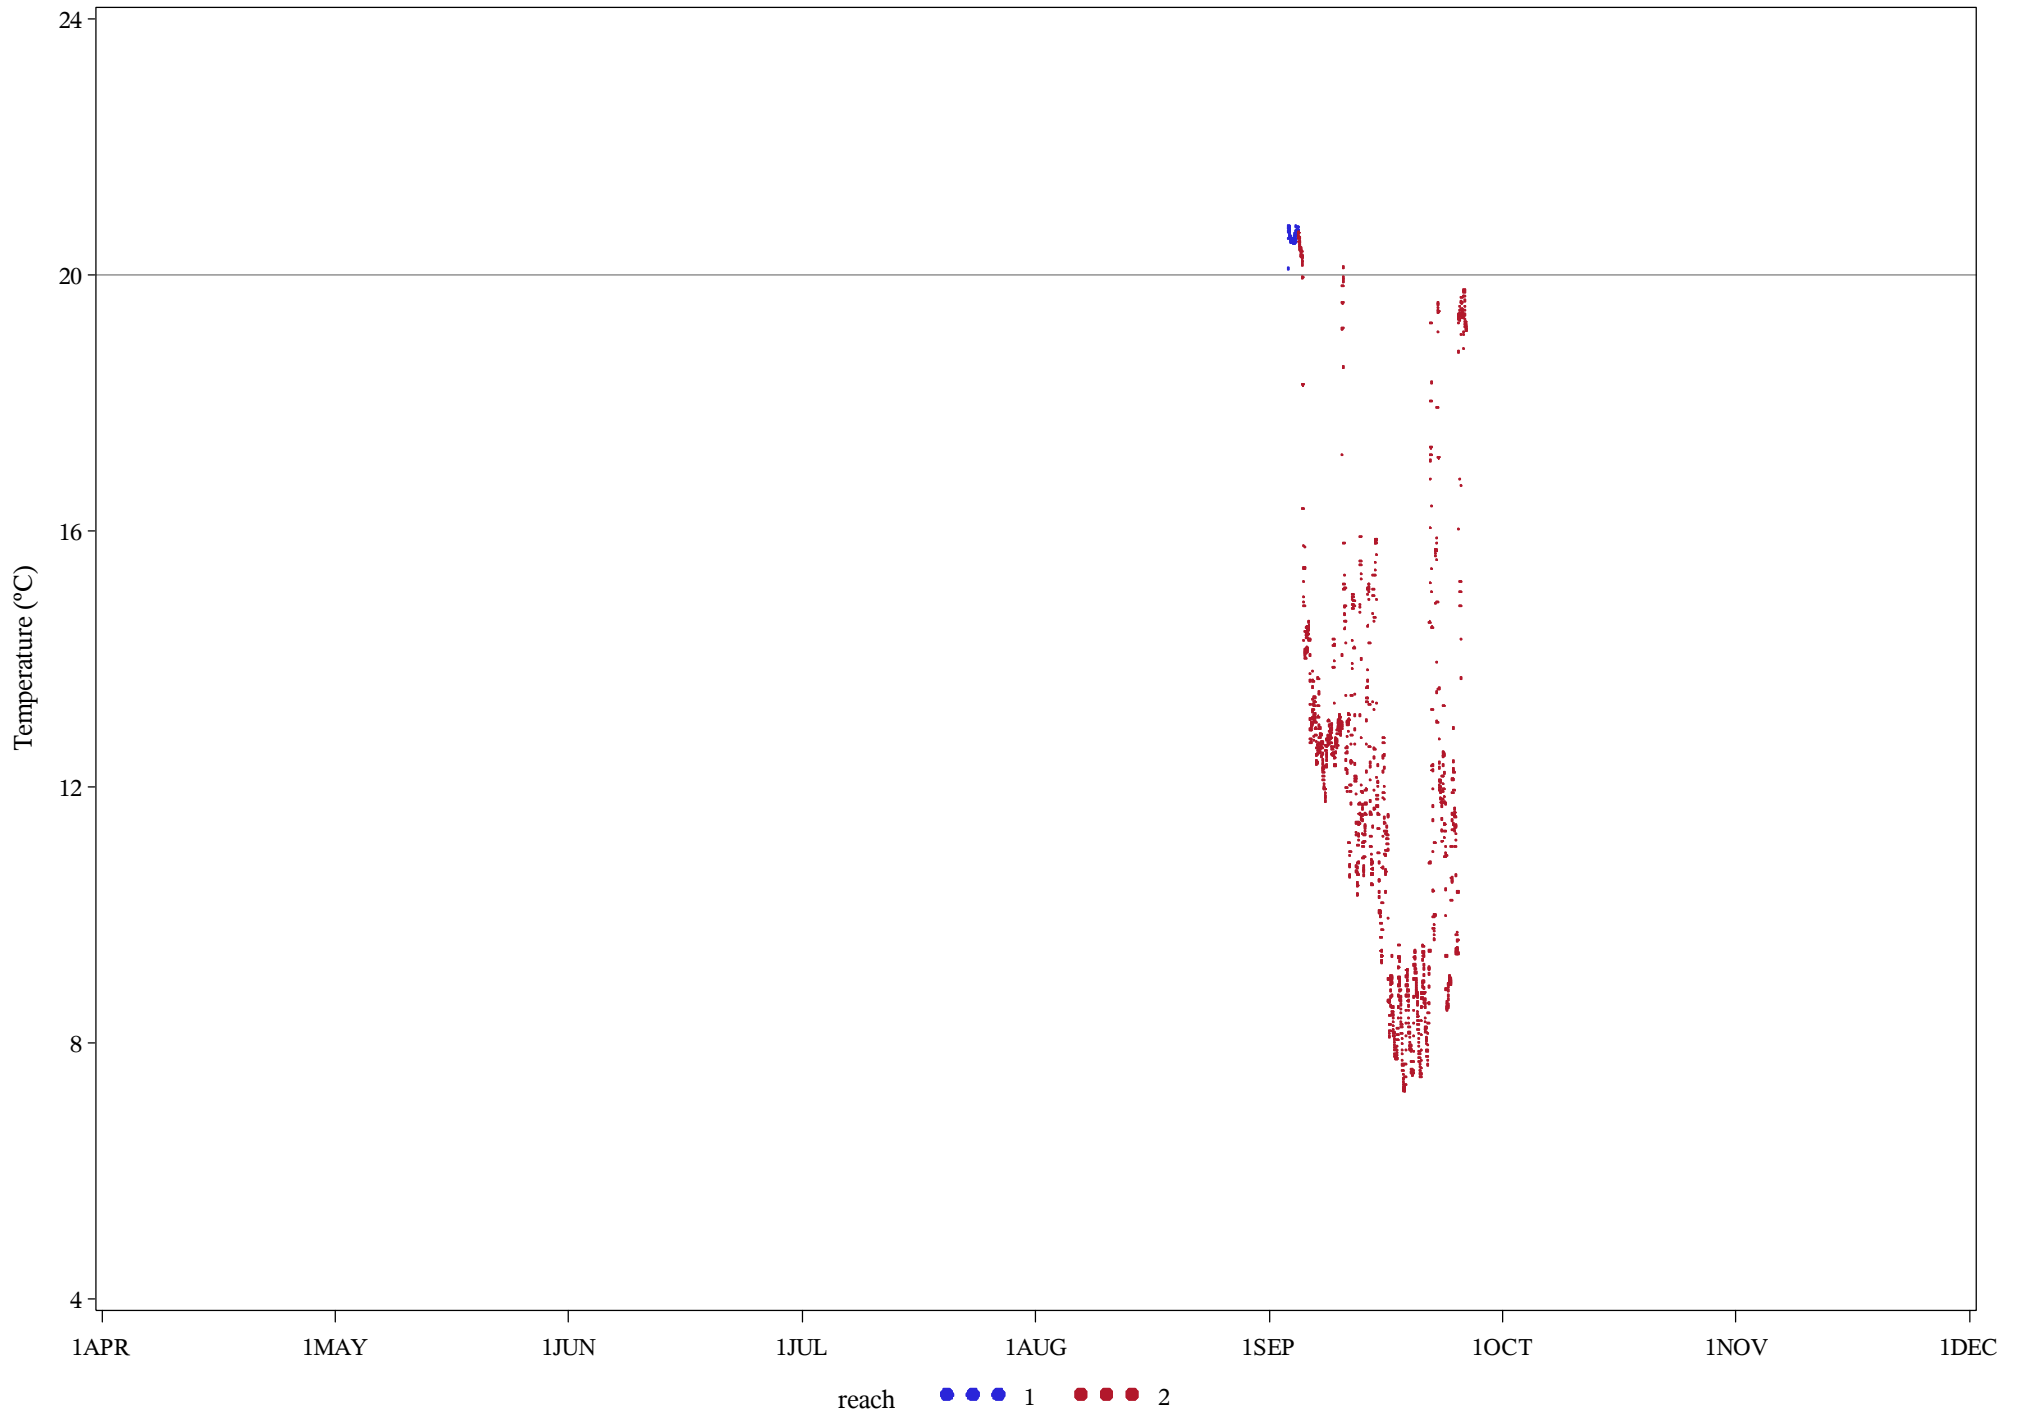

# Steelhead 4914A

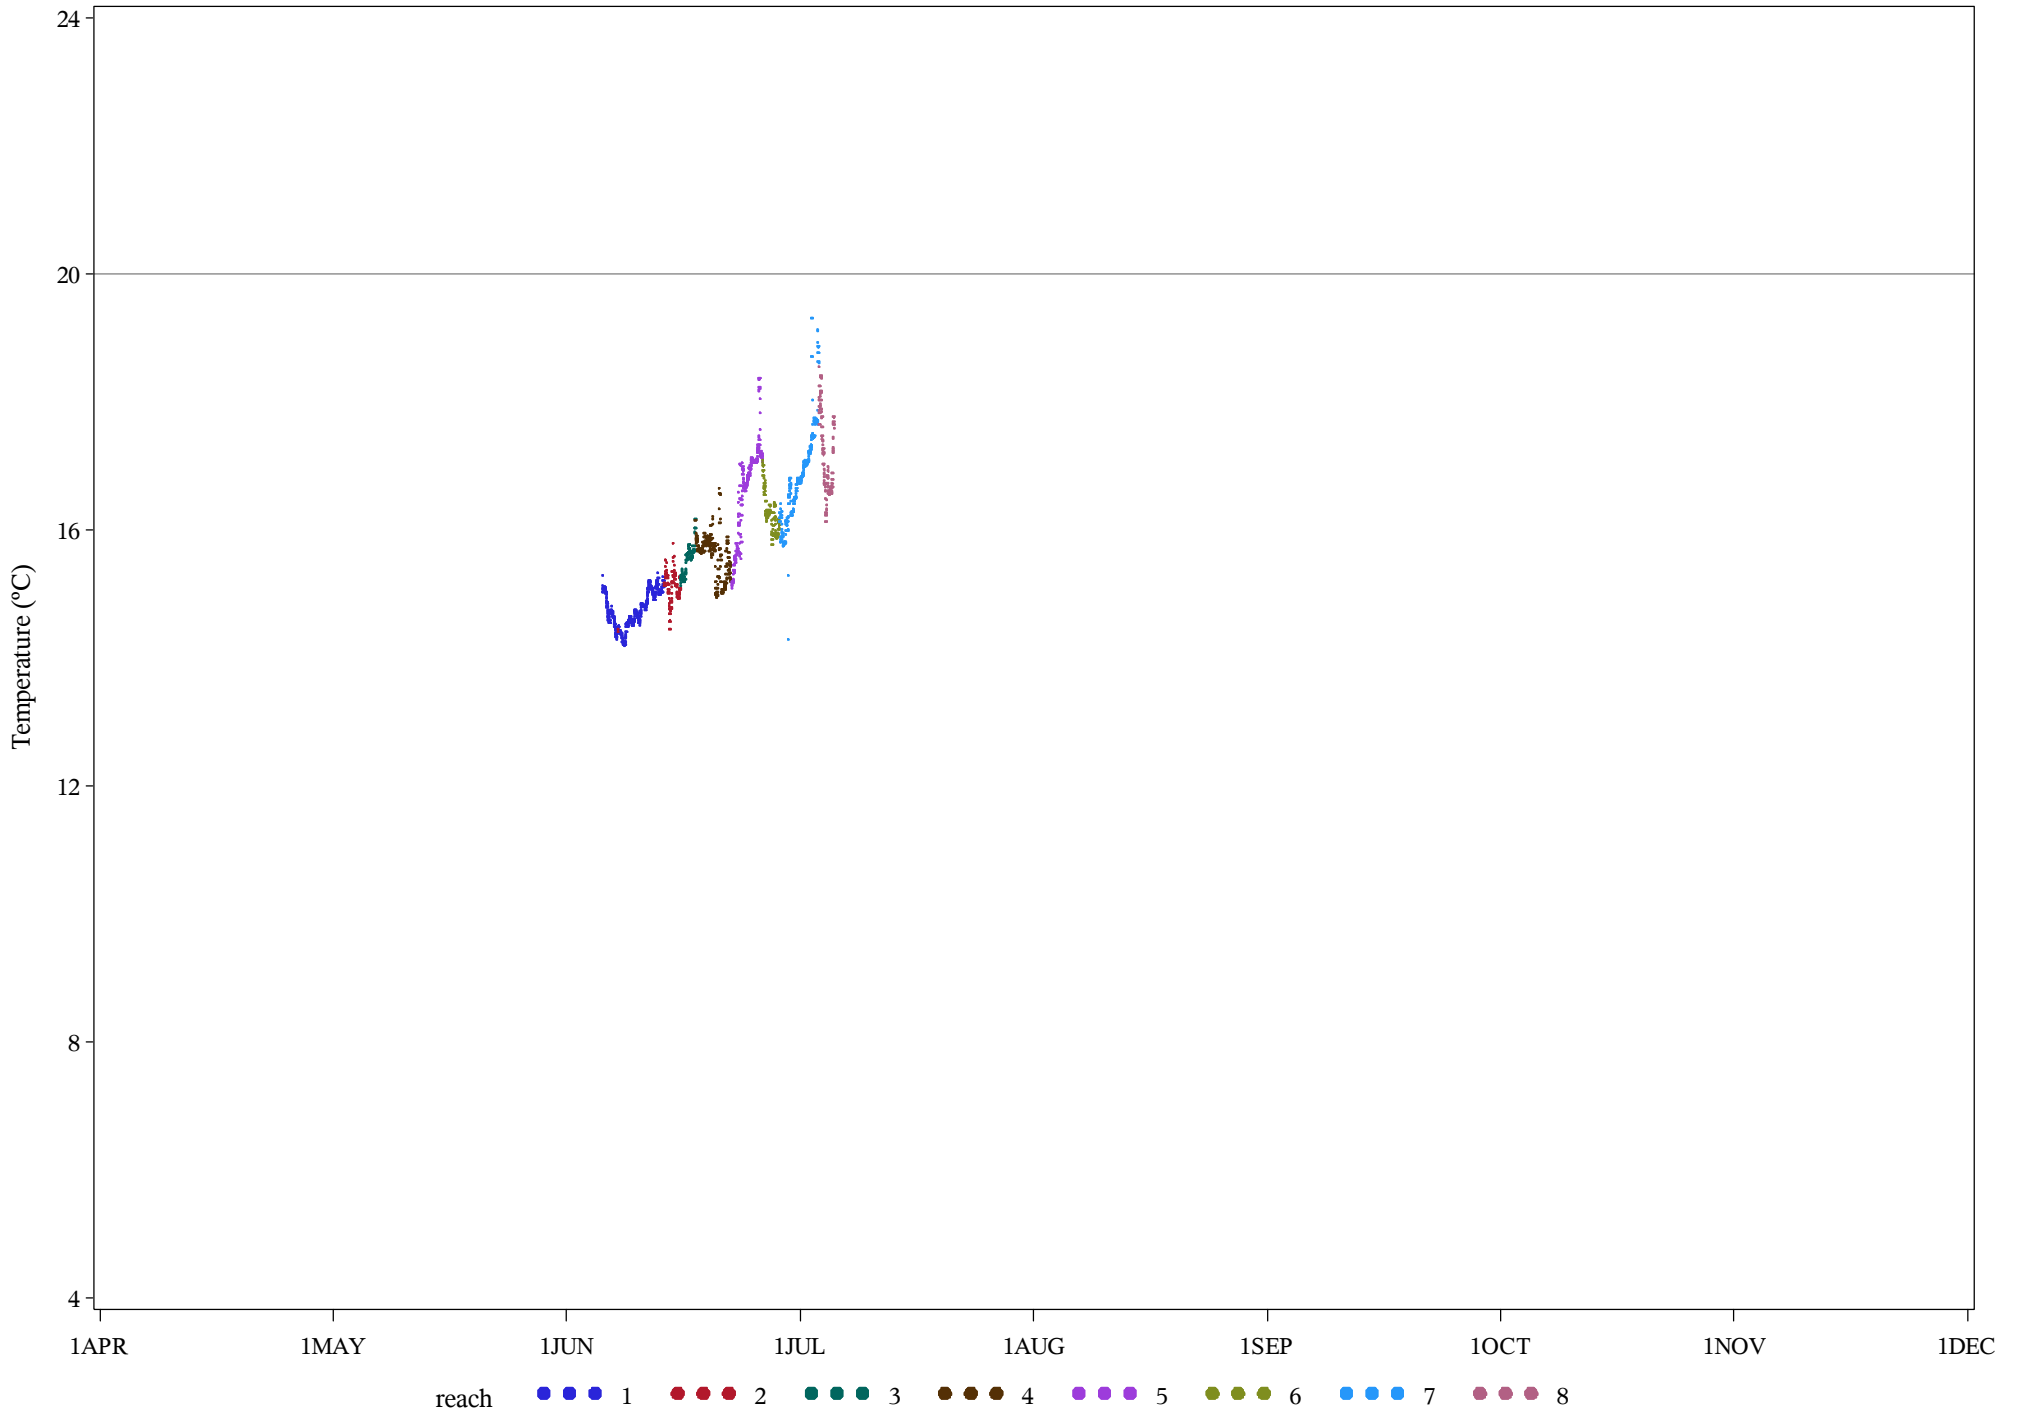



**Steelhead  
4915B**

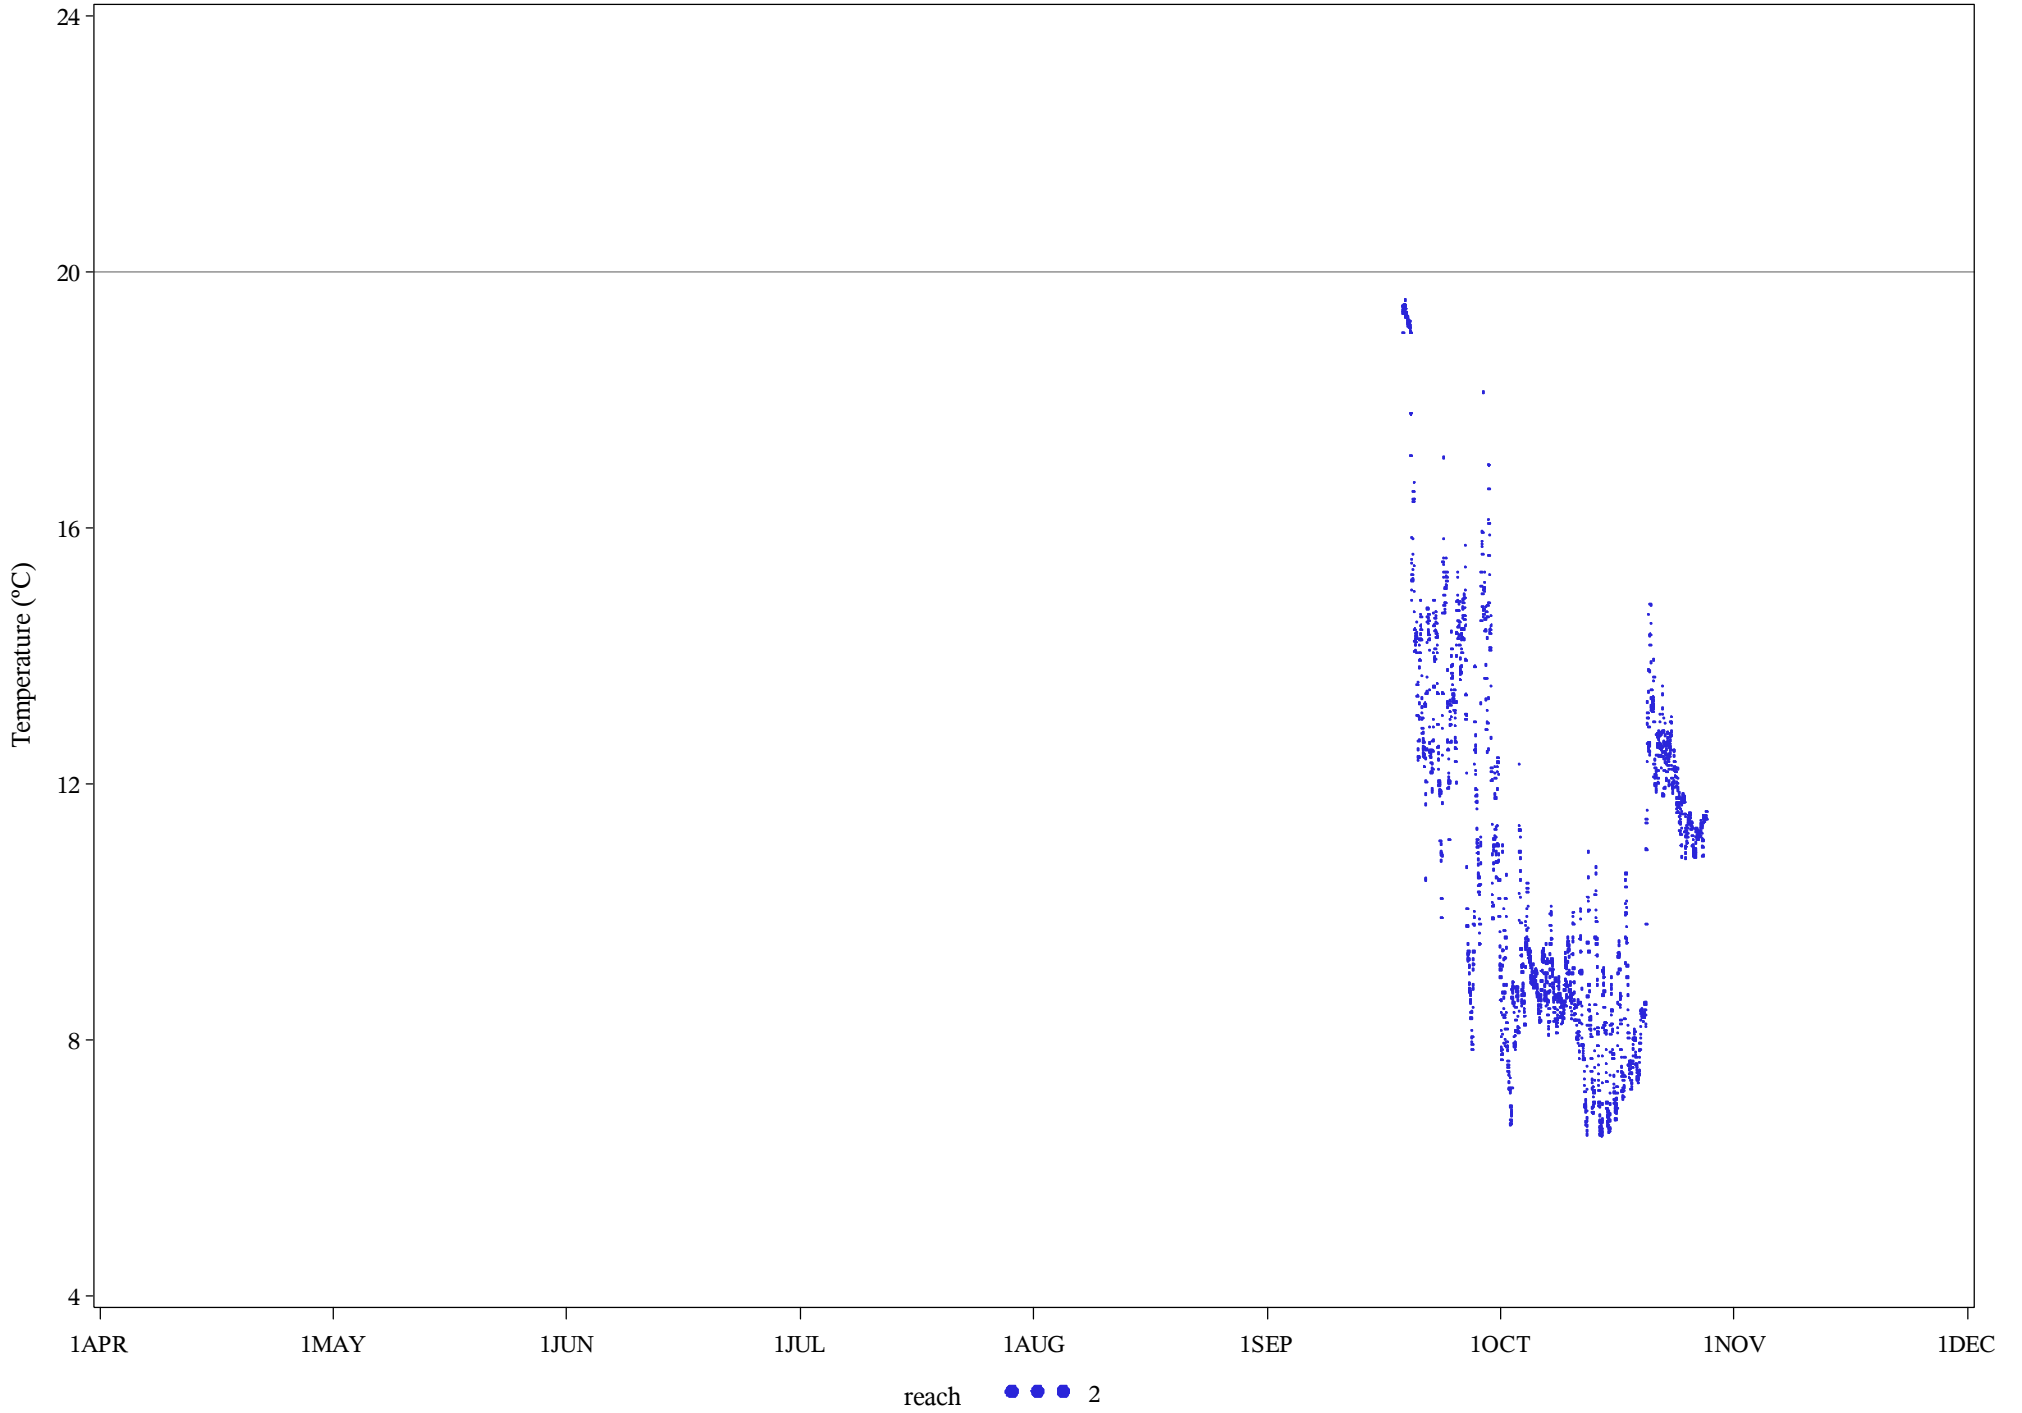

# Steelhead 4916B

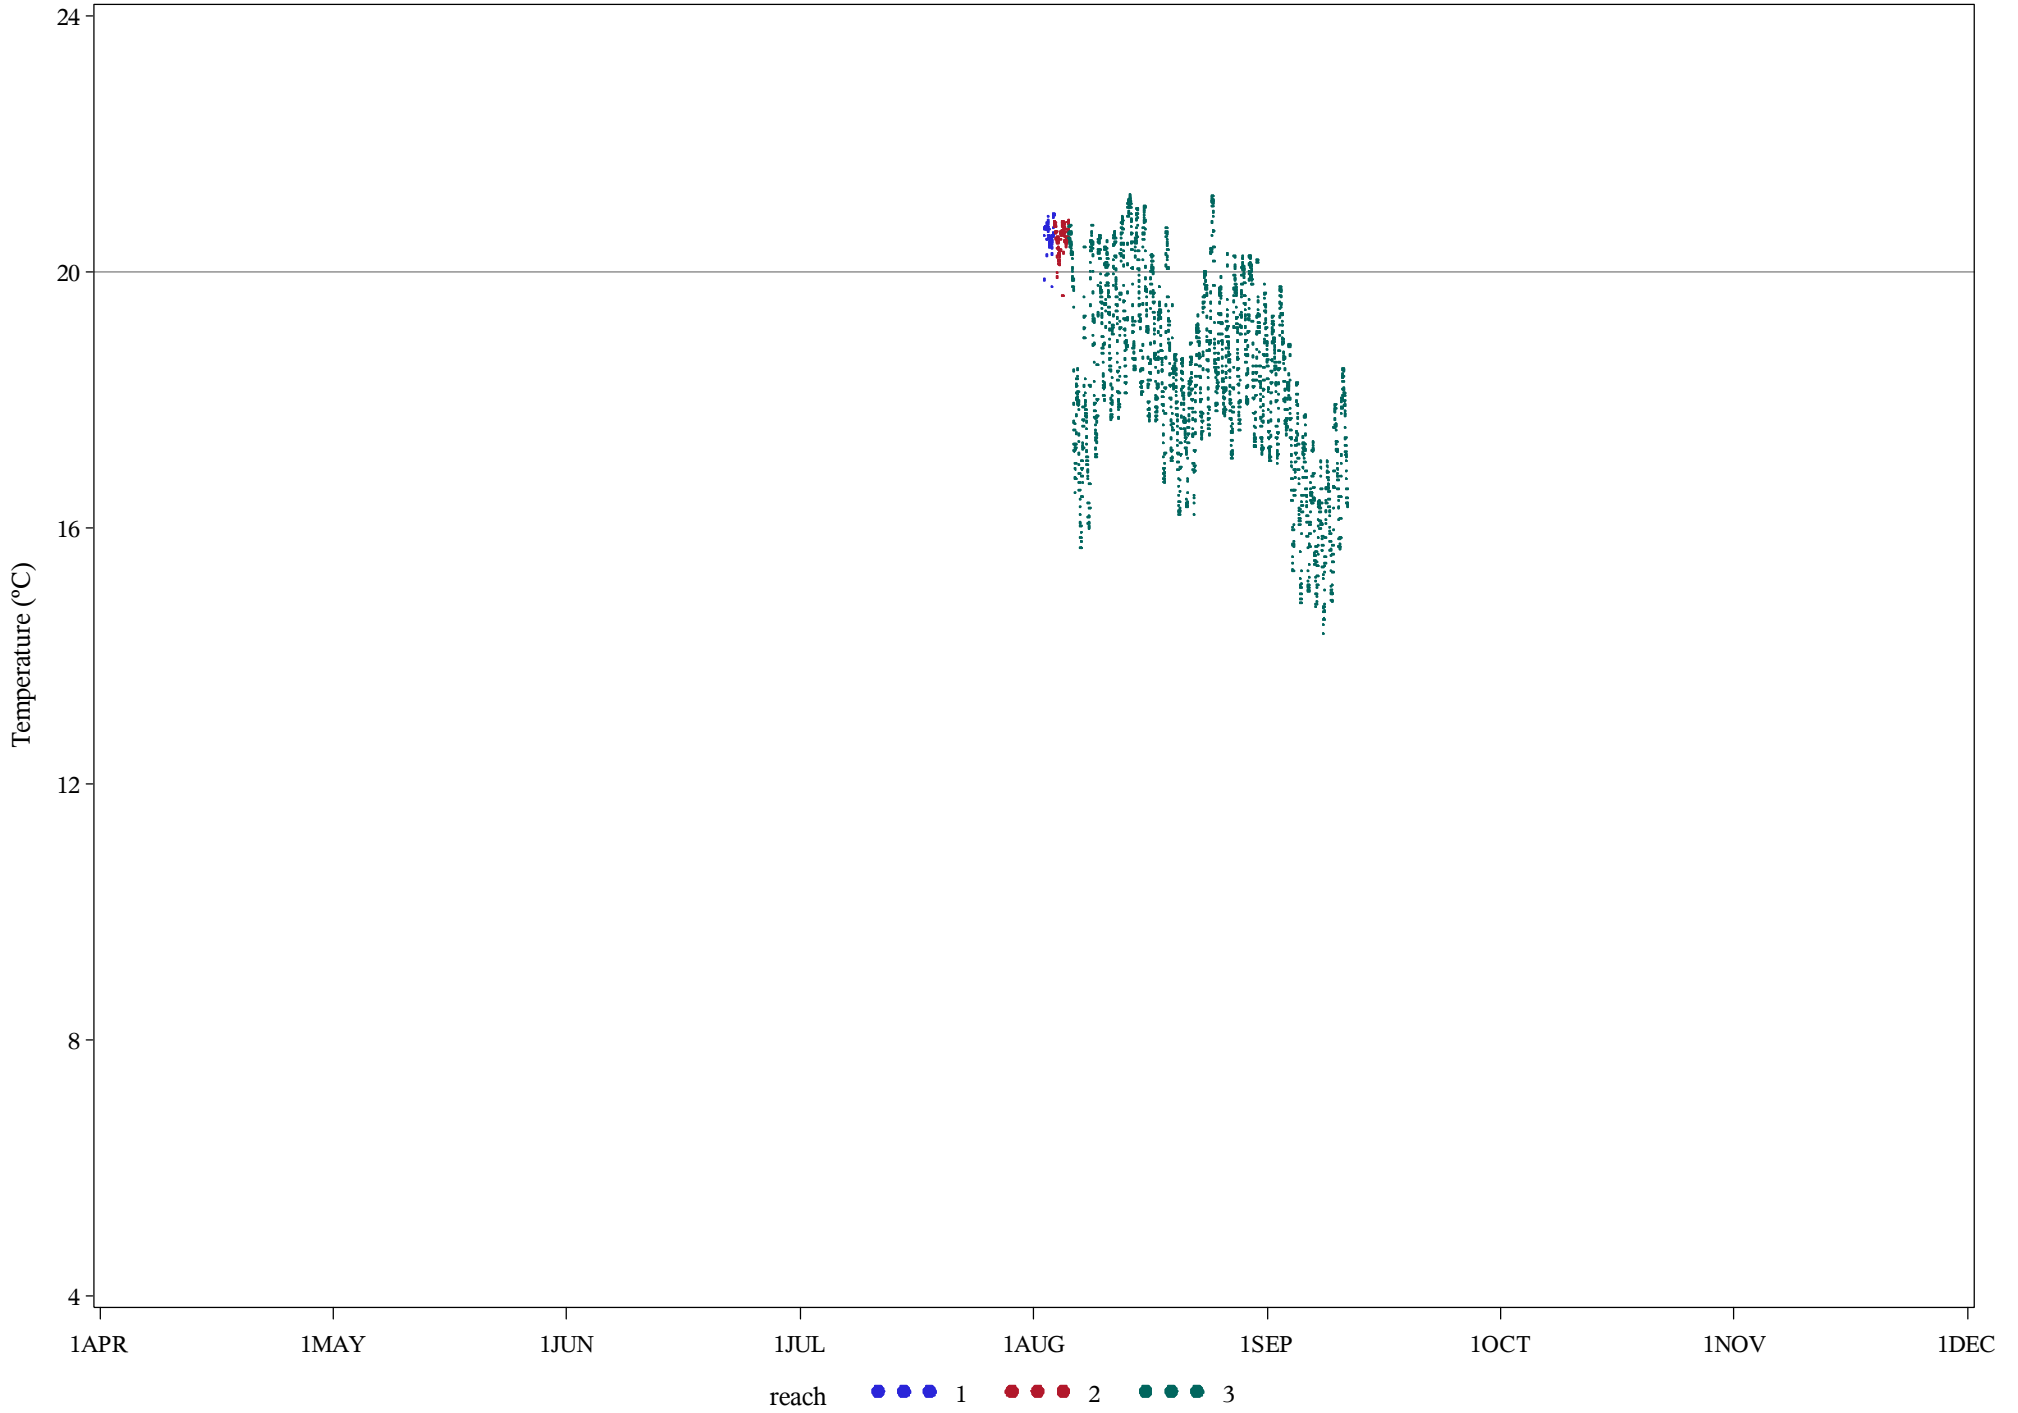

# Steelhead 4918B

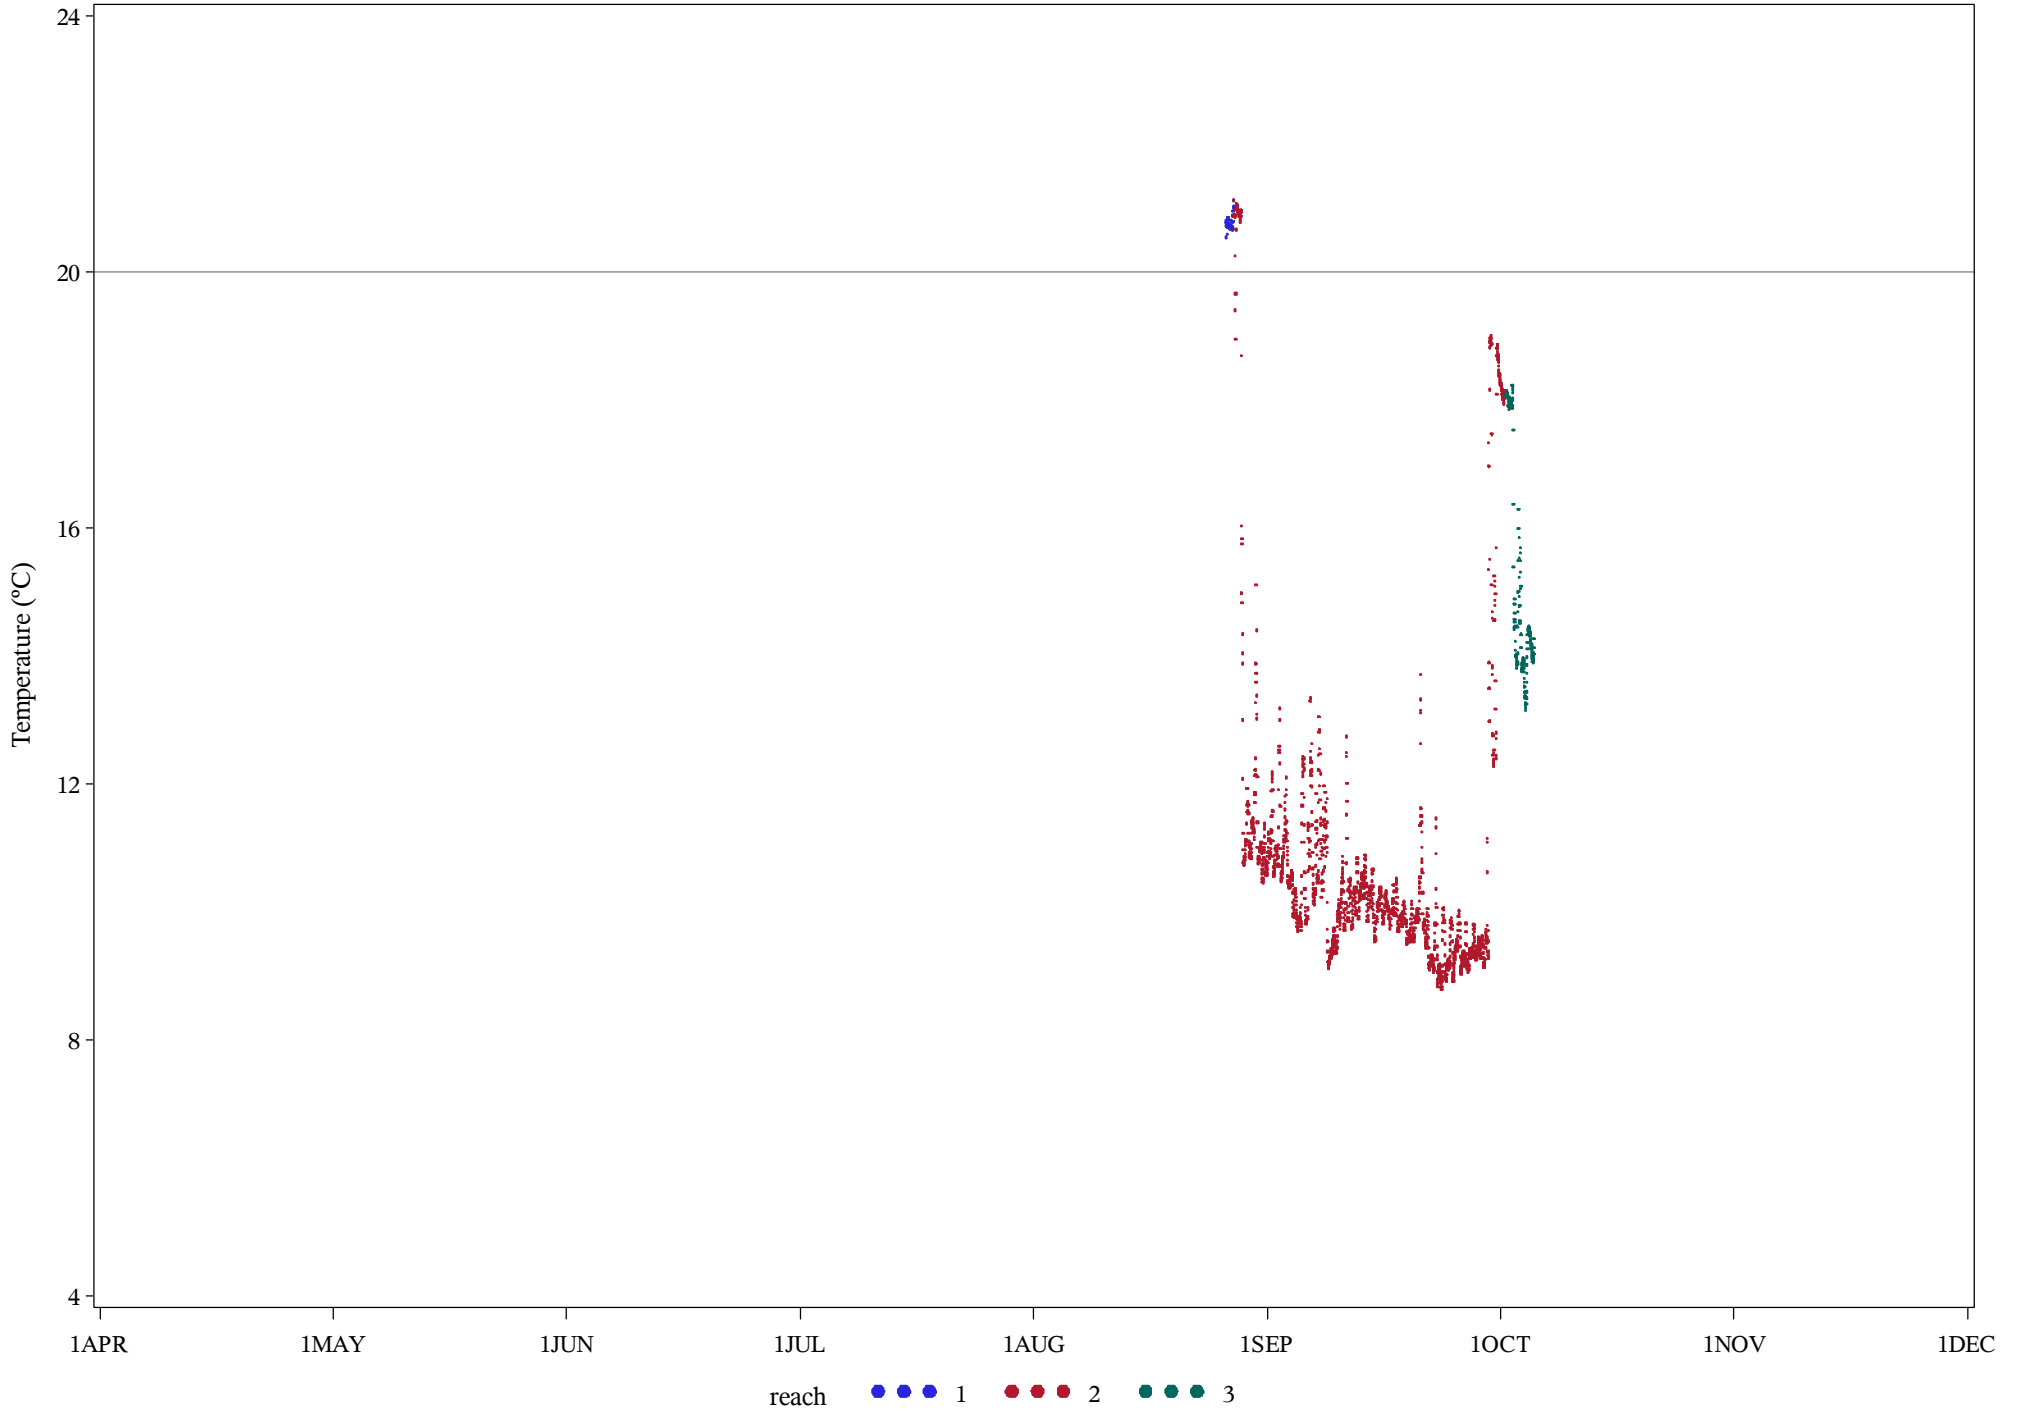

# Steelhead 4922B

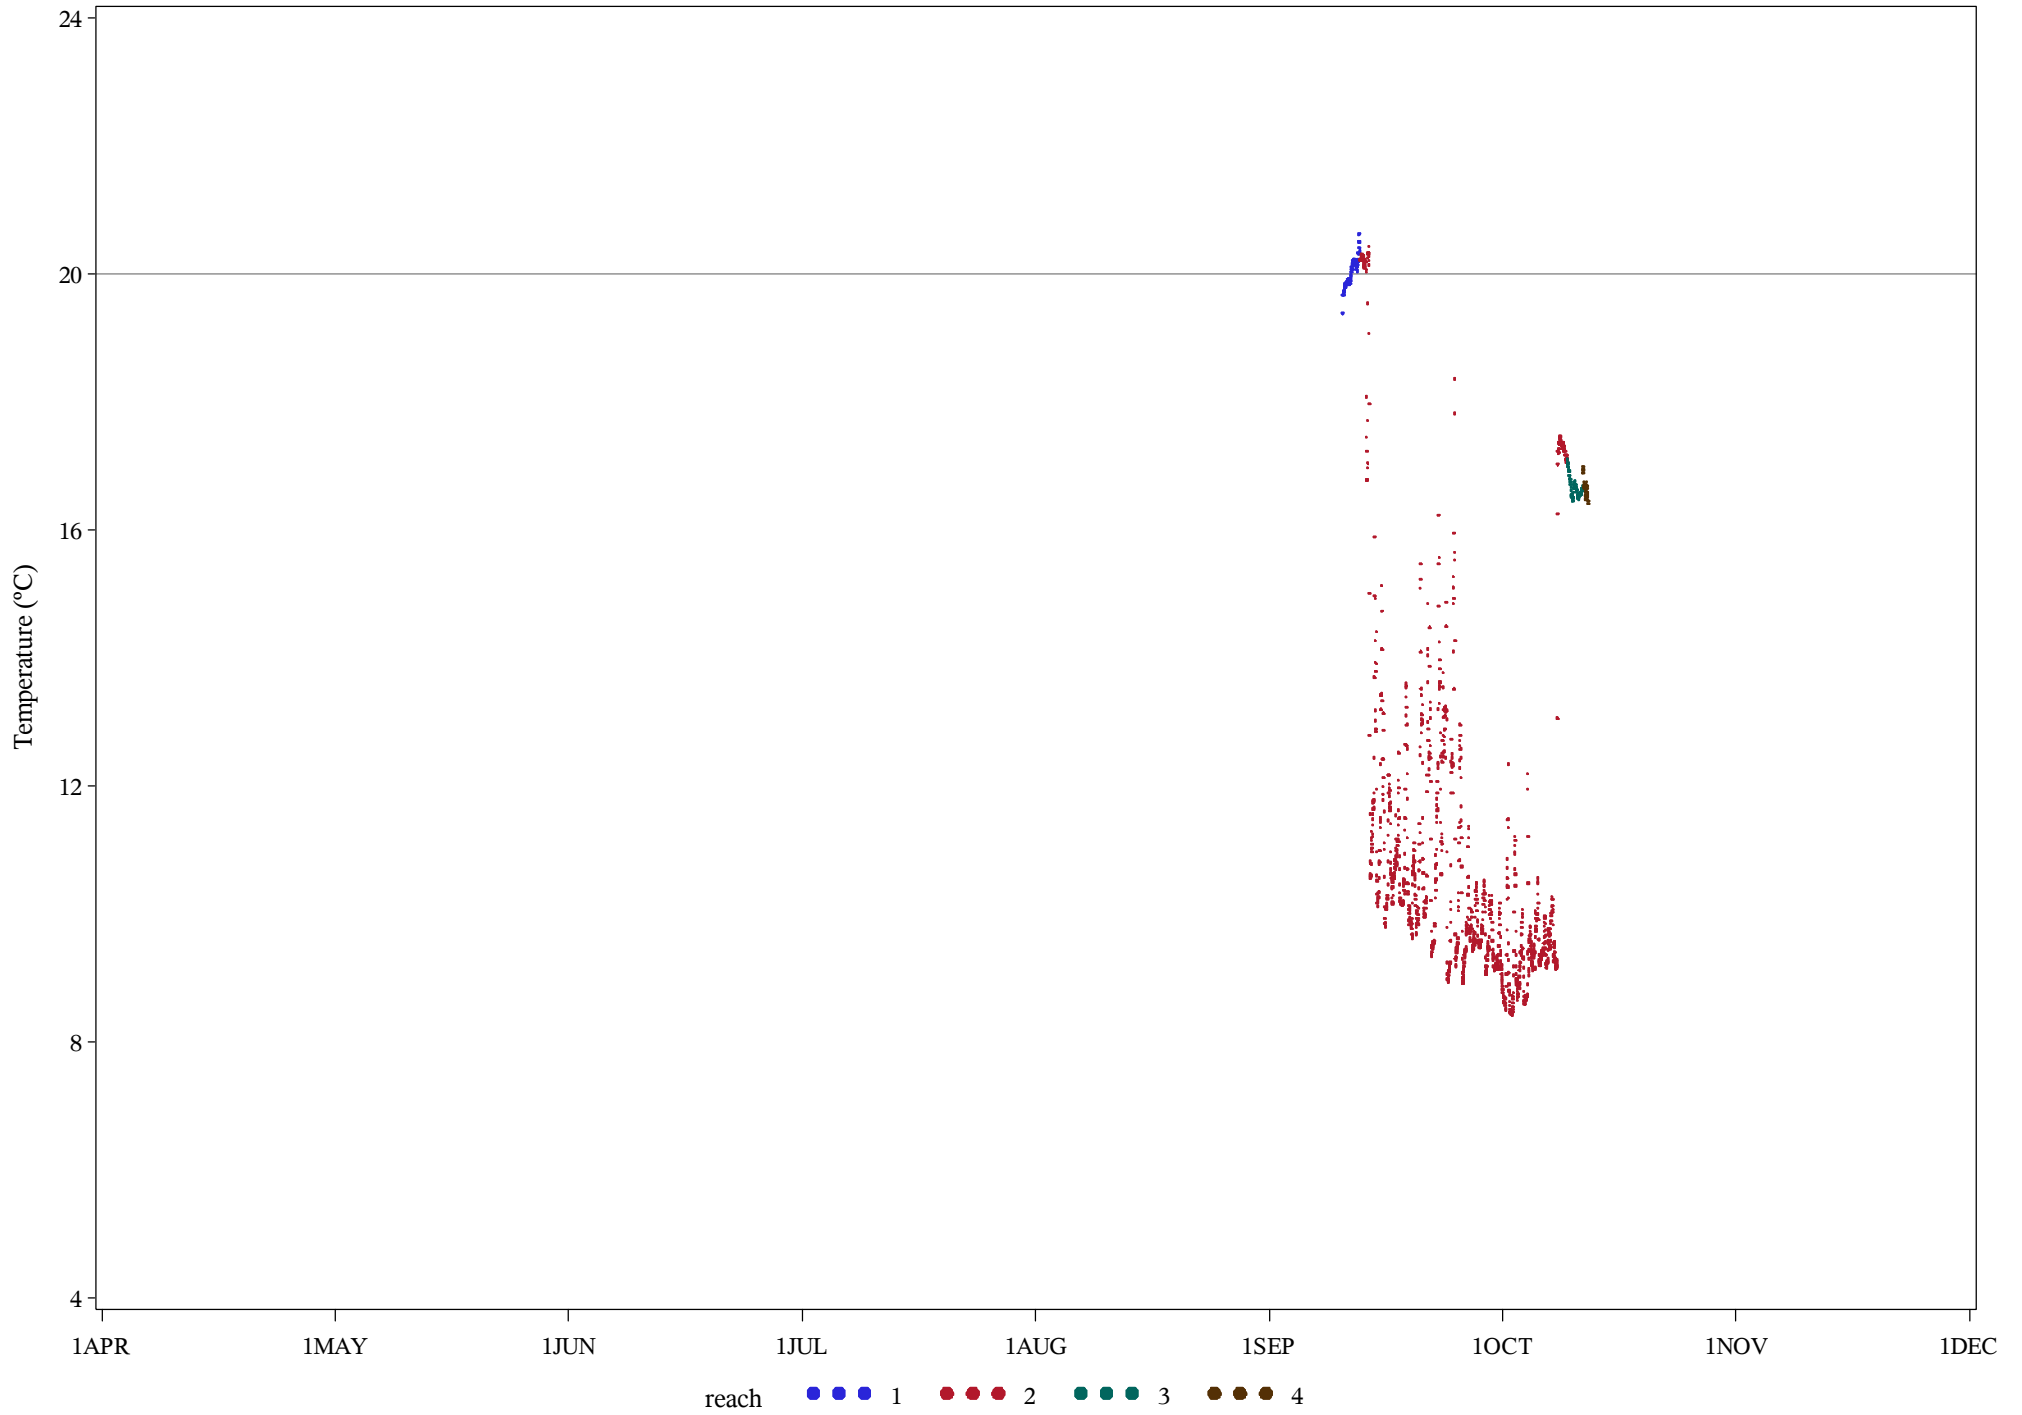

# Steelhead 4924B

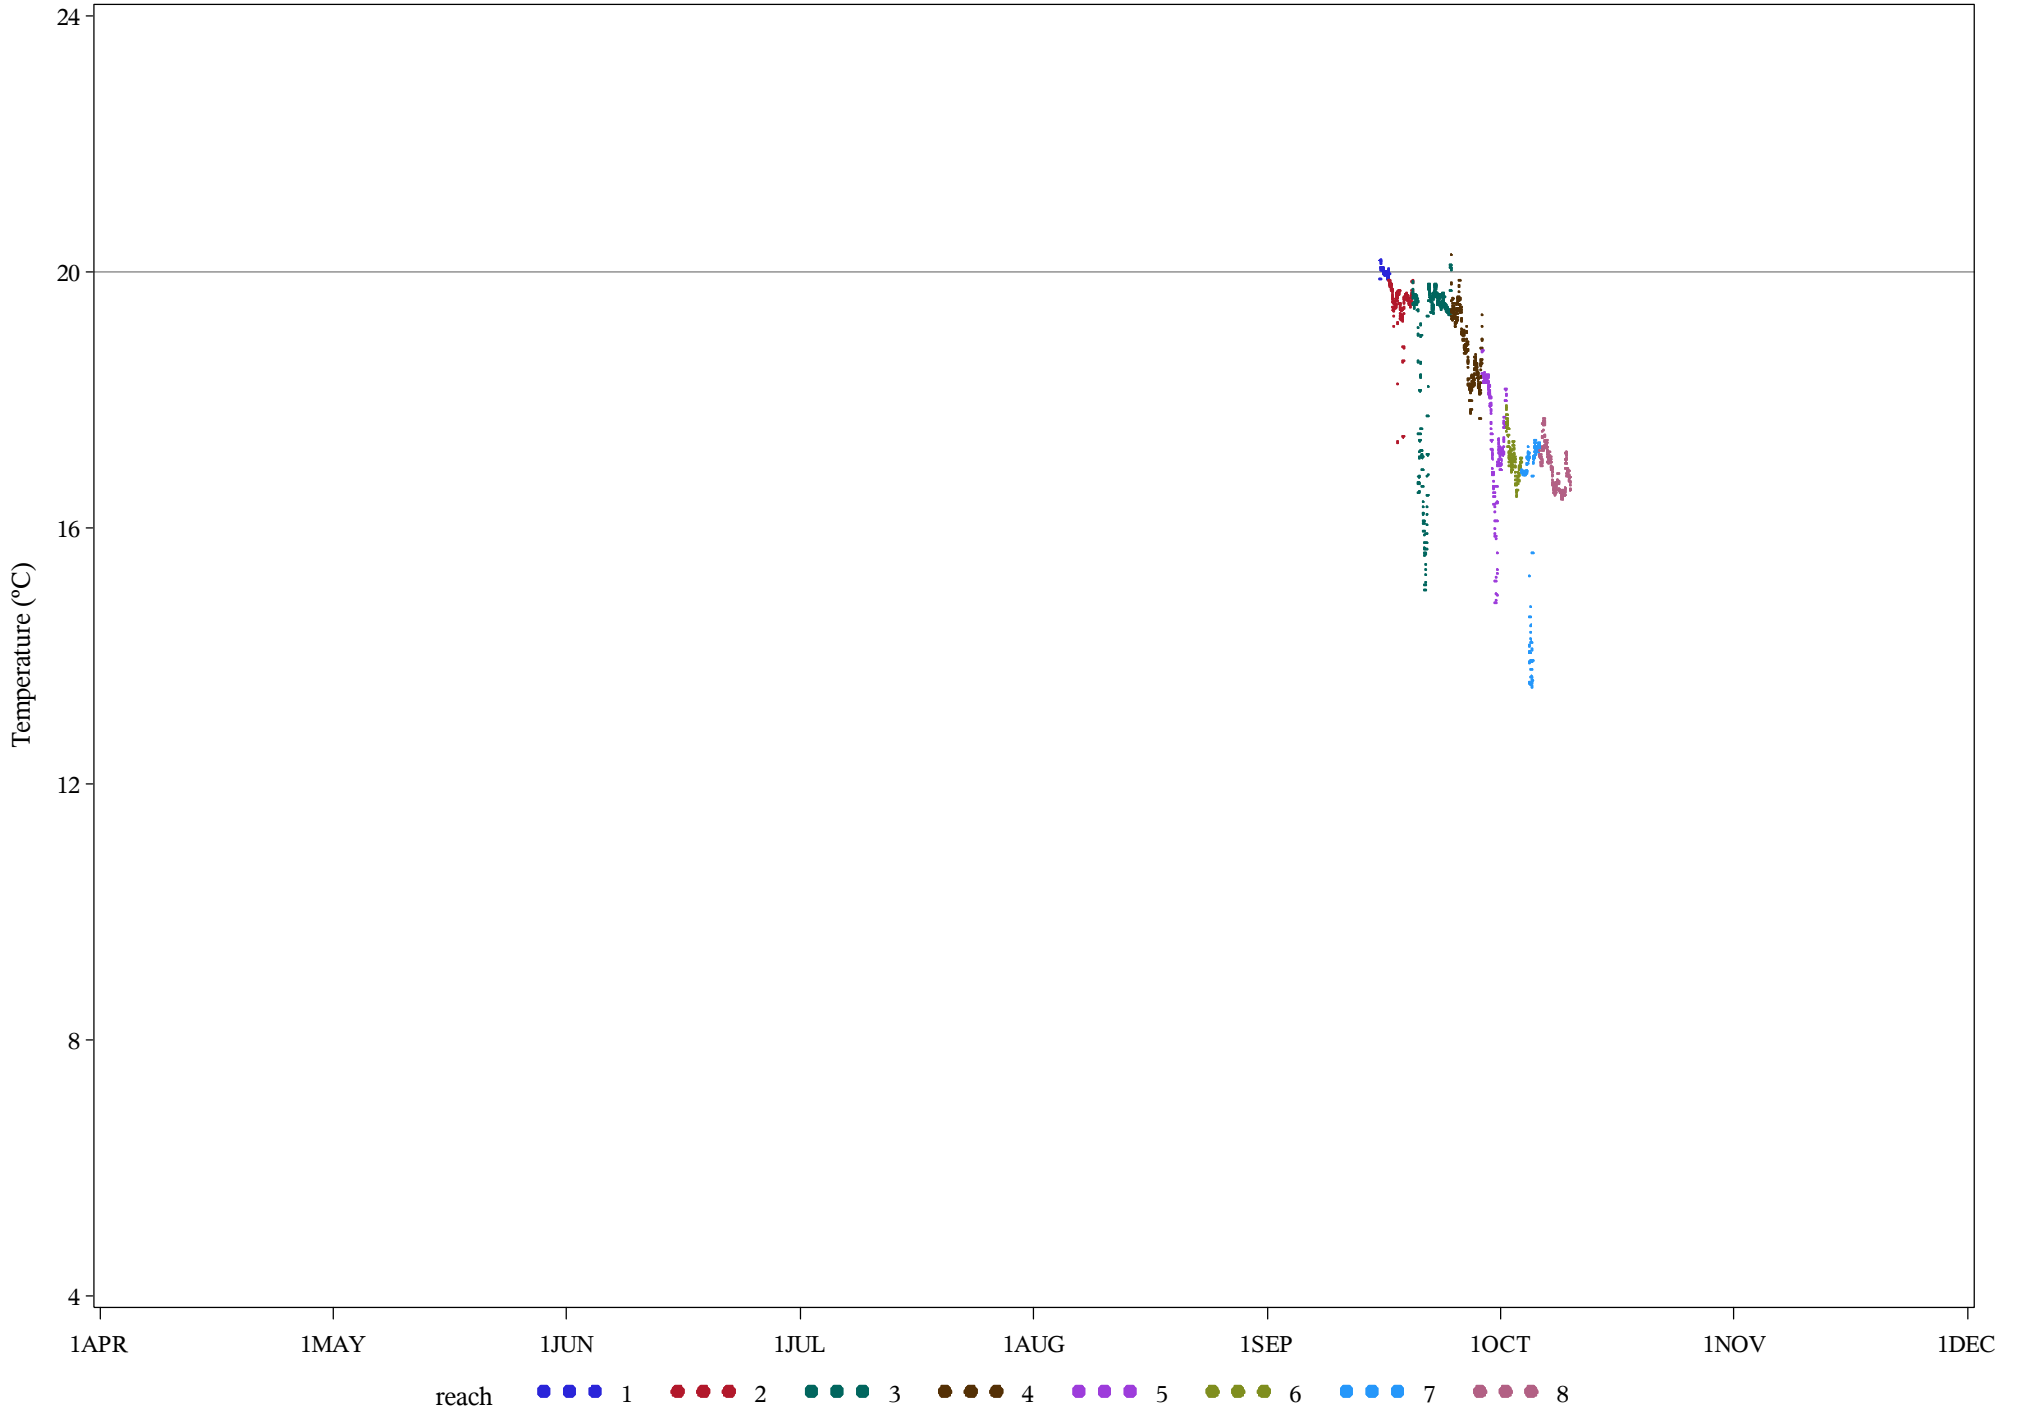

Steelhead  
4927A

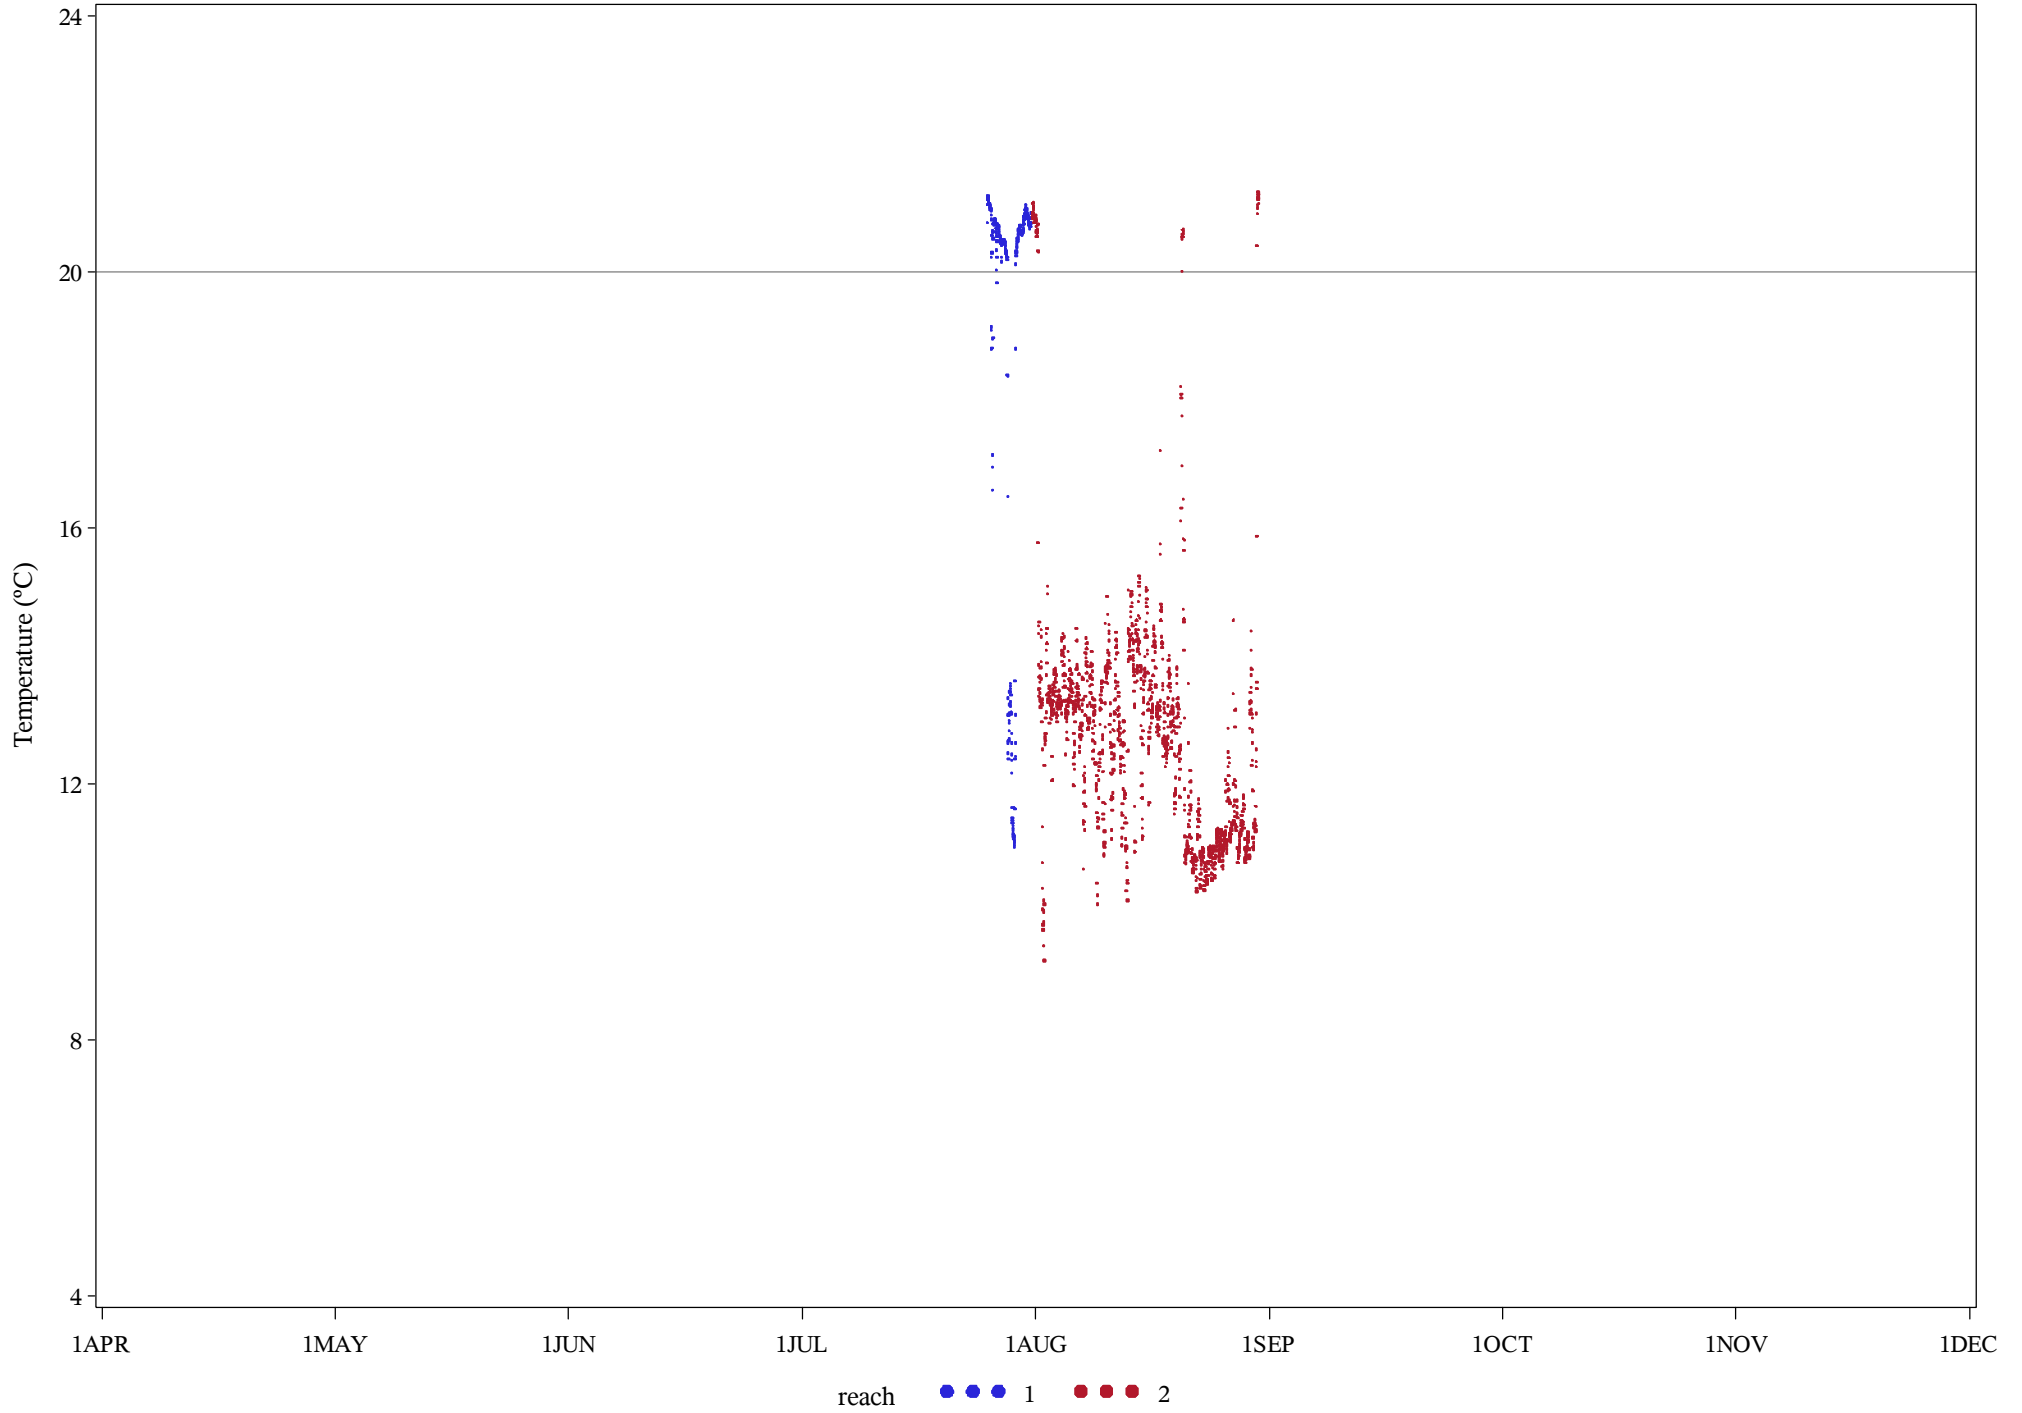

# Steelhead 4928A

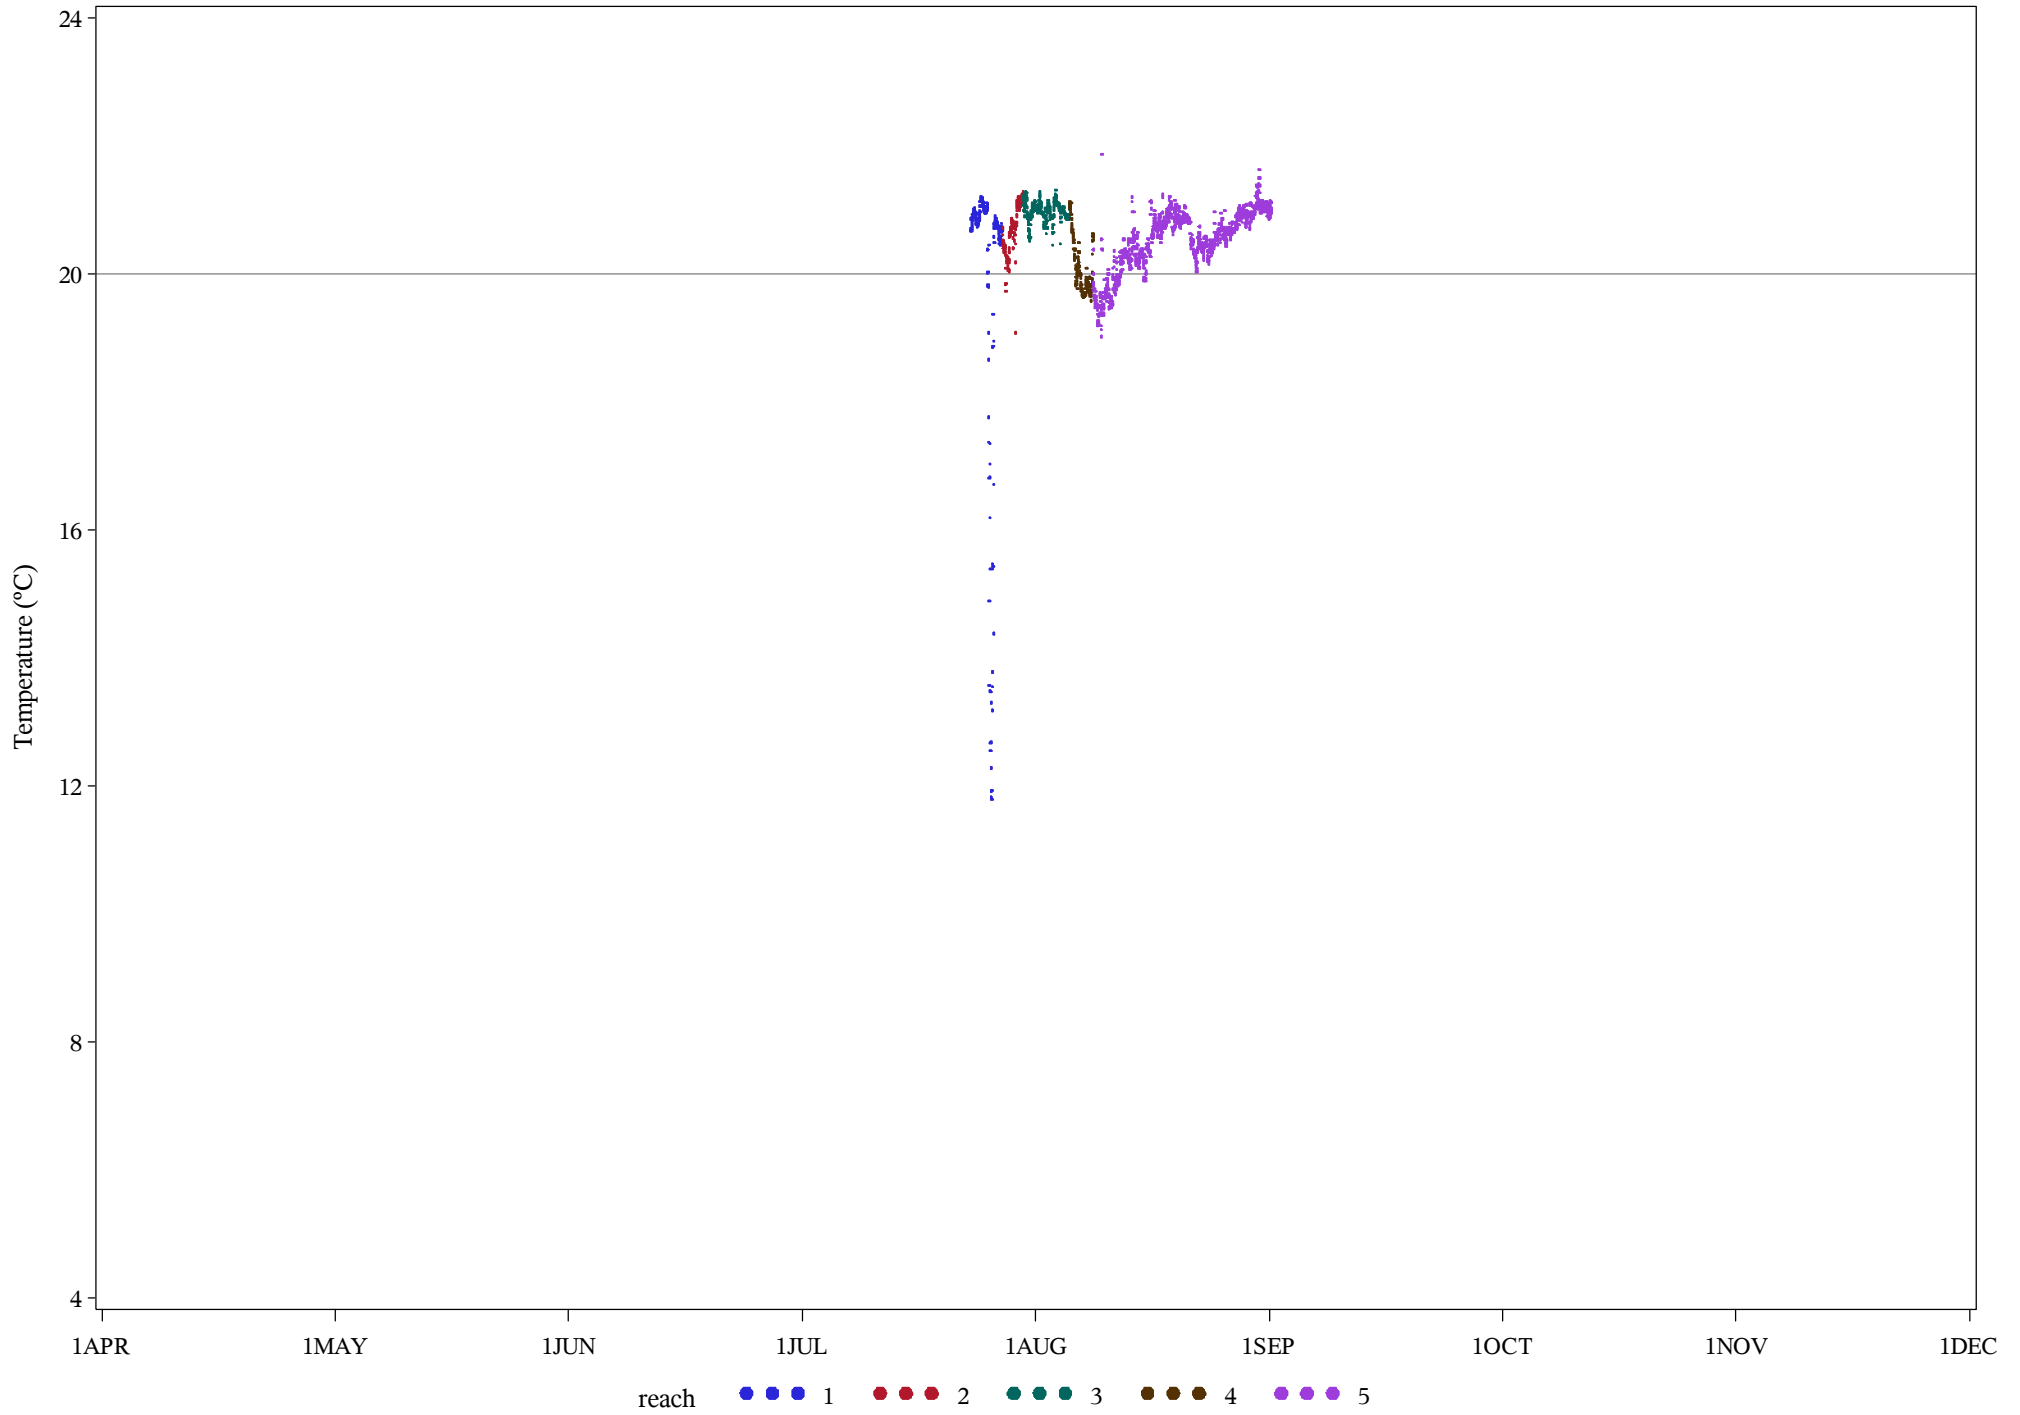

# Steelhead 4931A

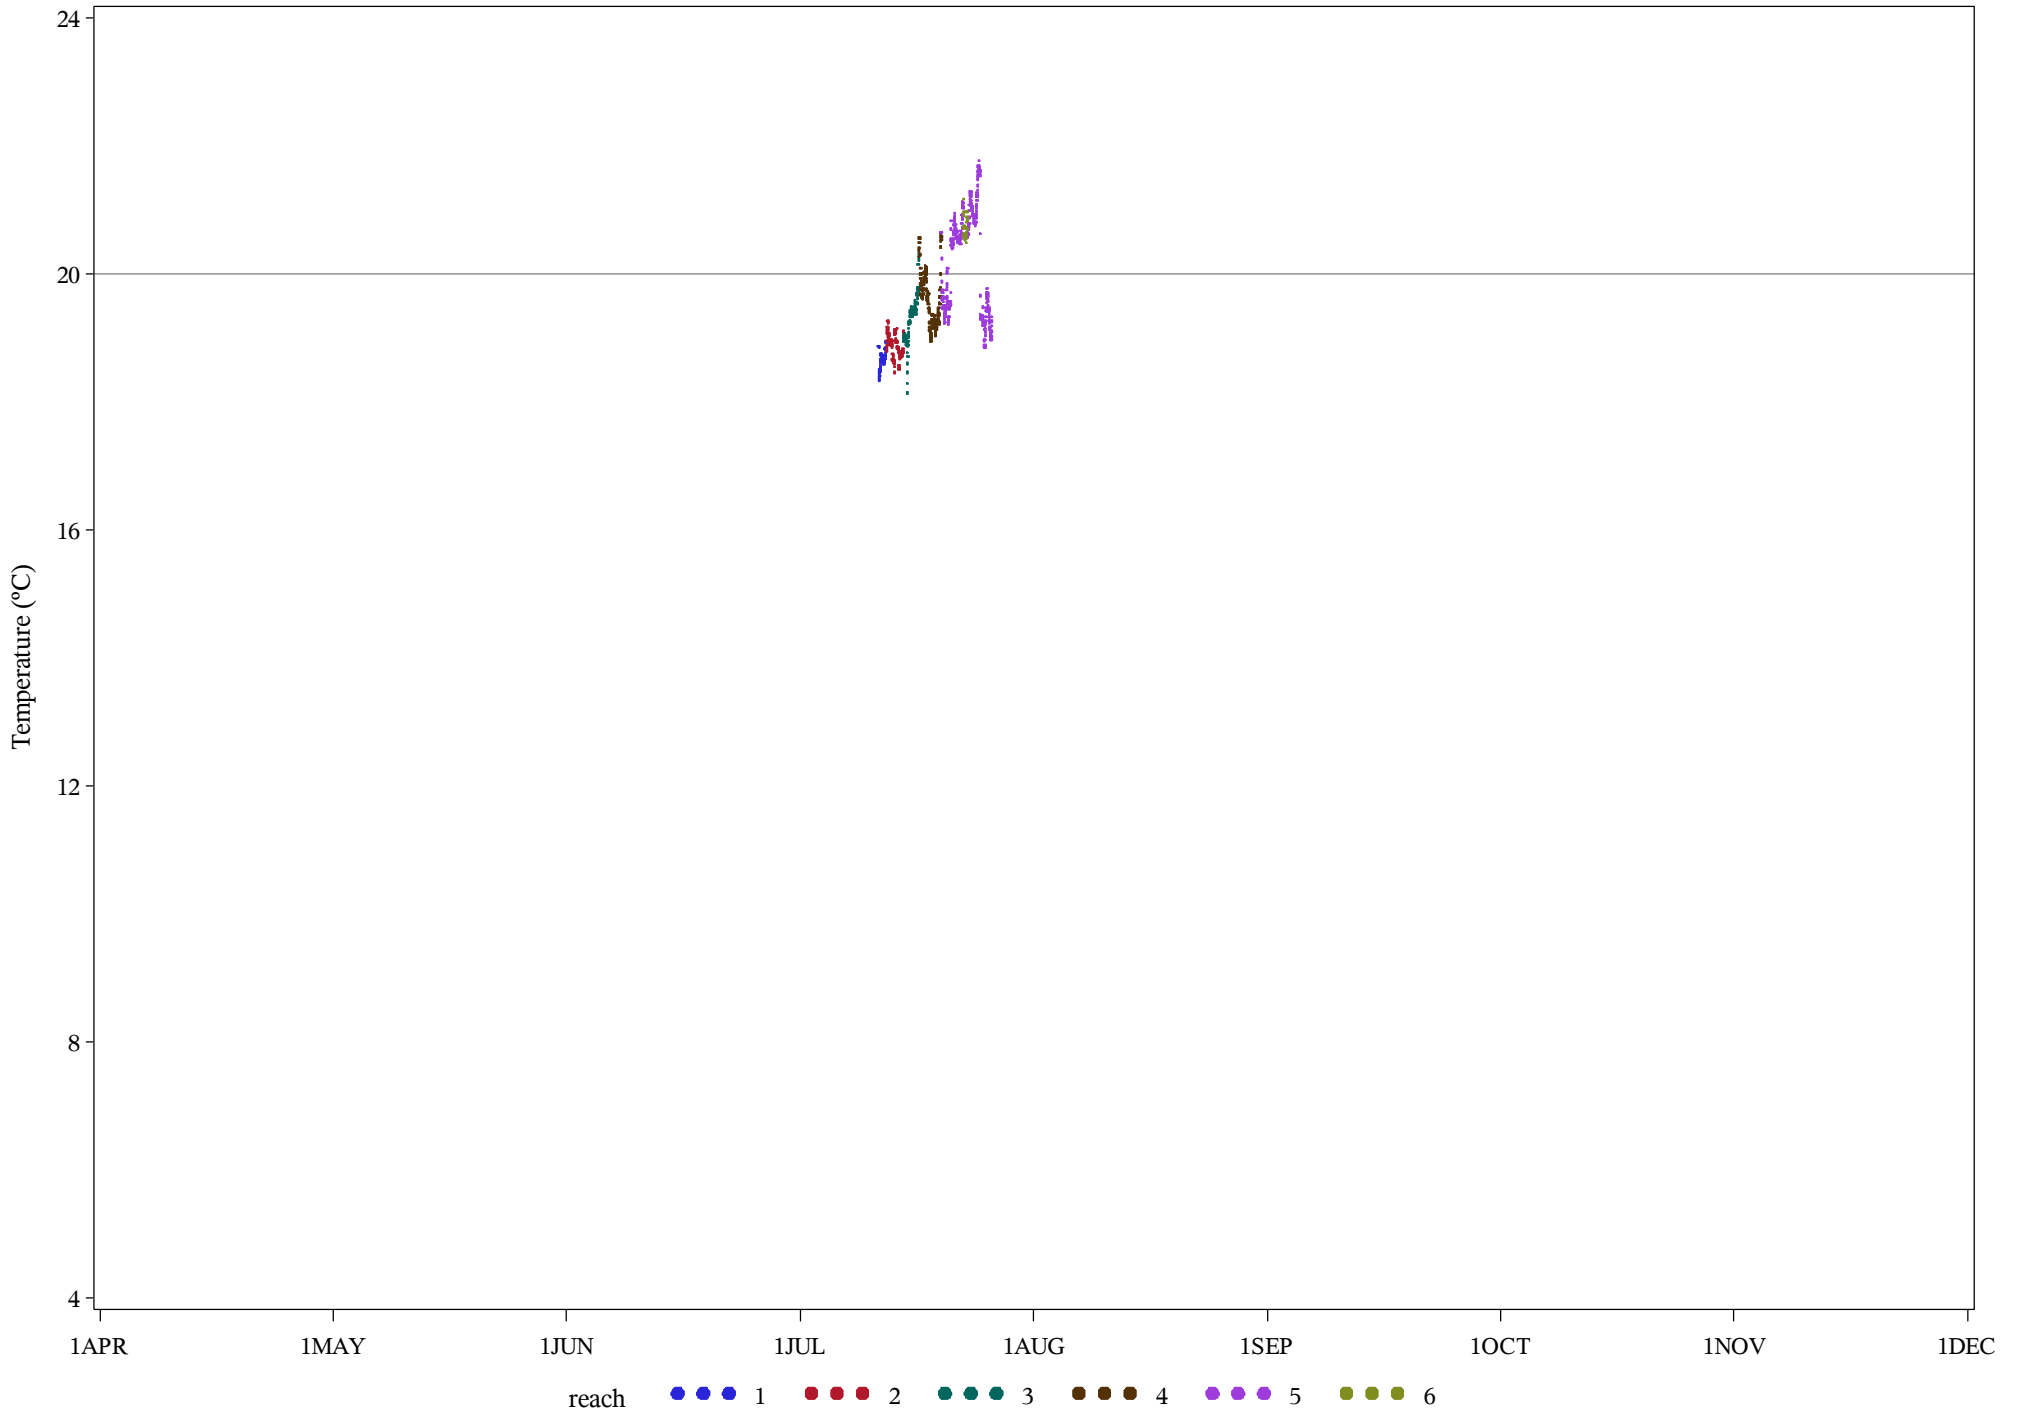



# Steelhead 4931B

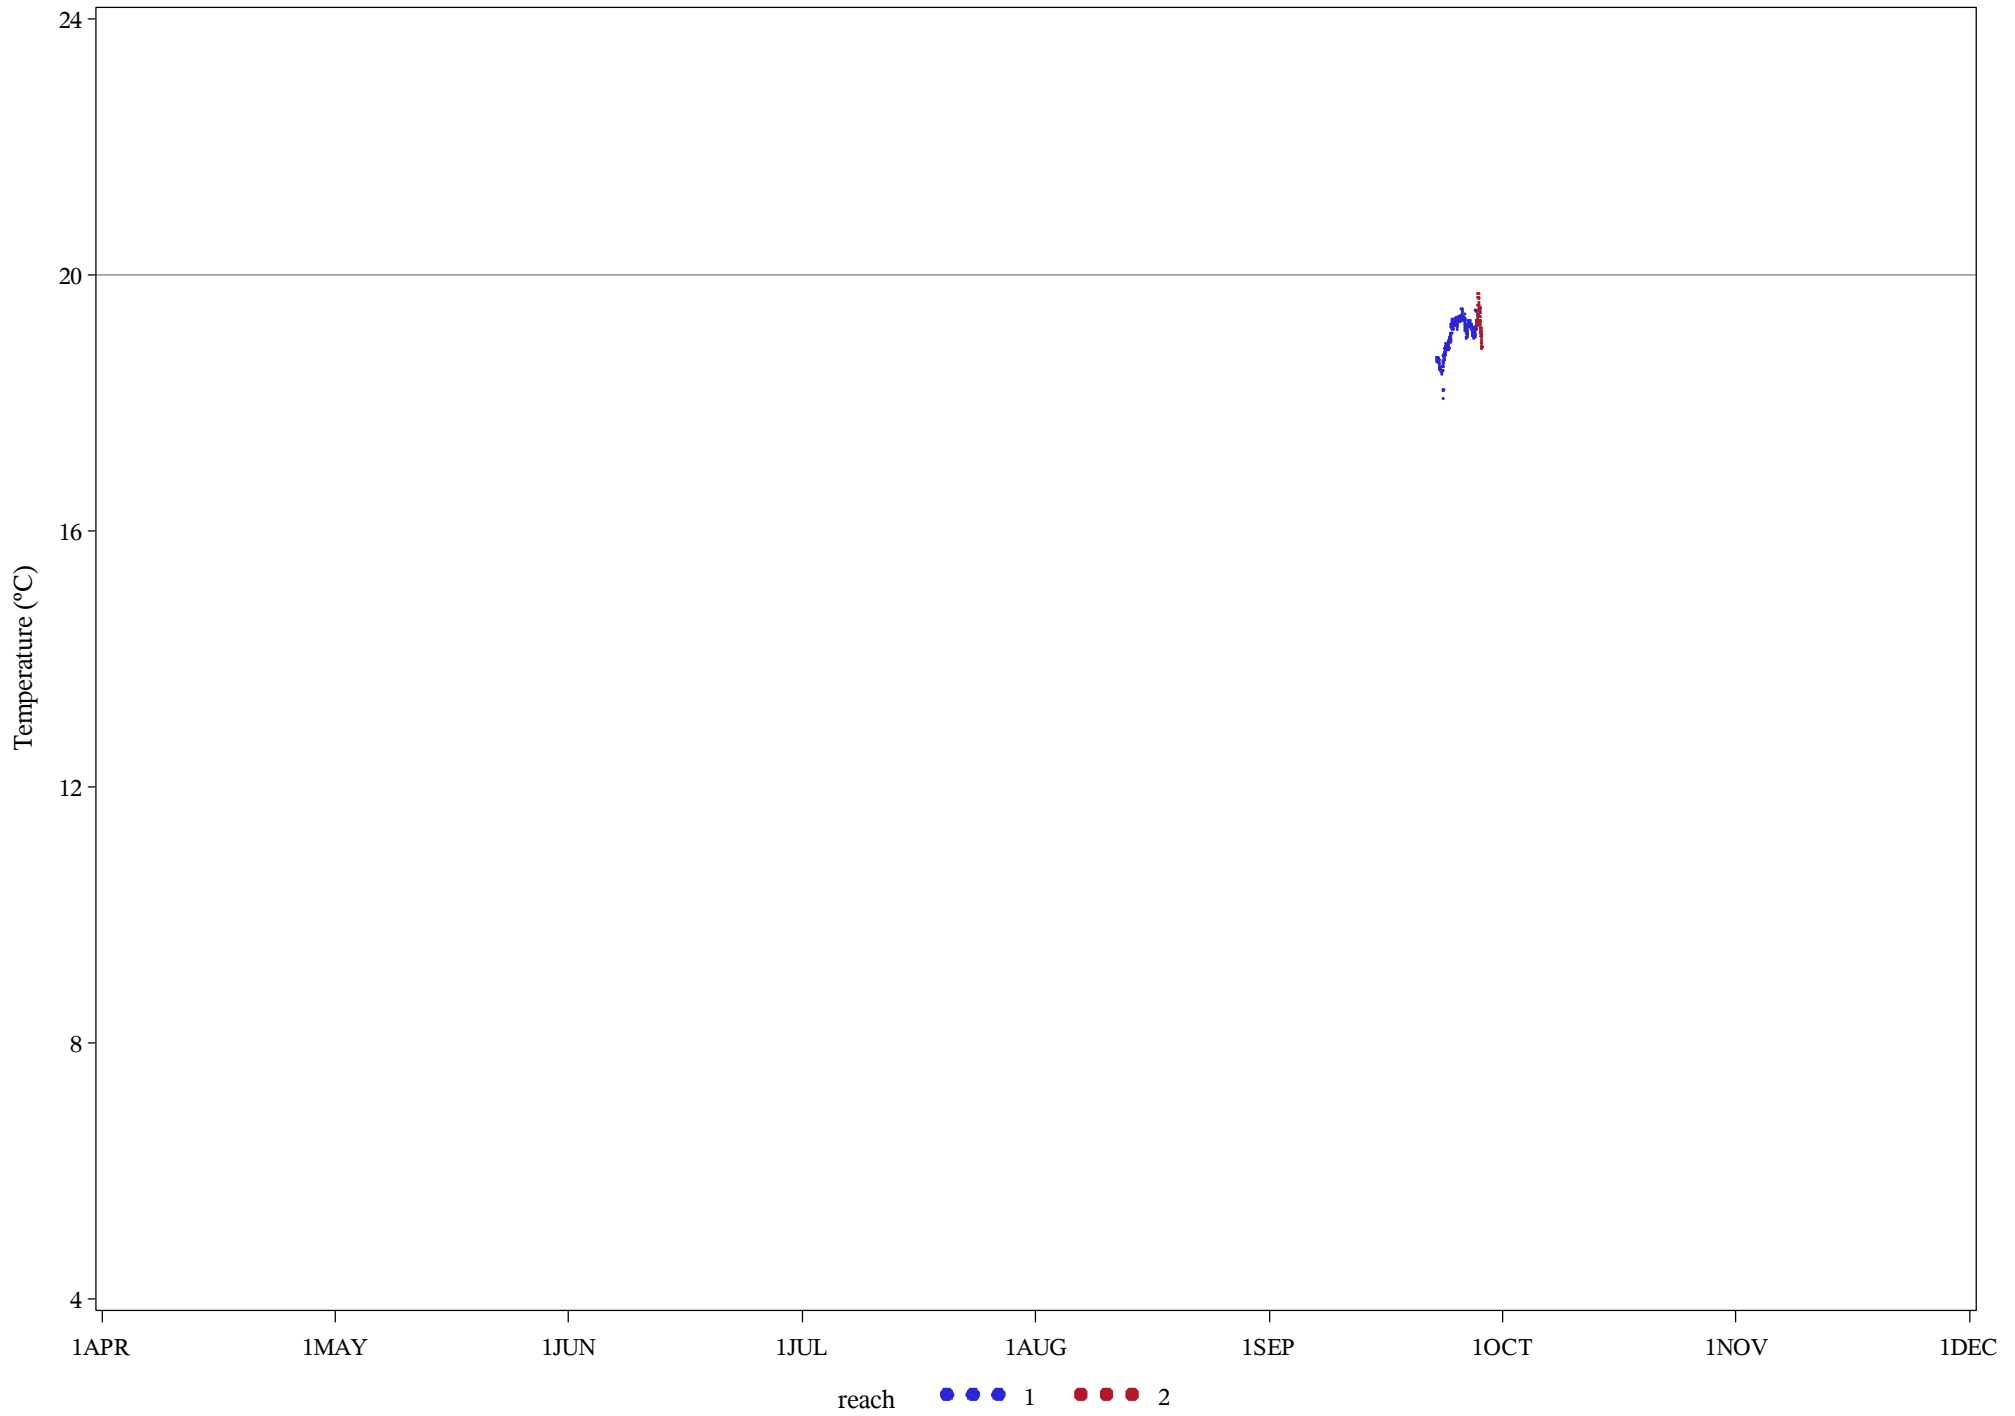

Steelhead  
4940A

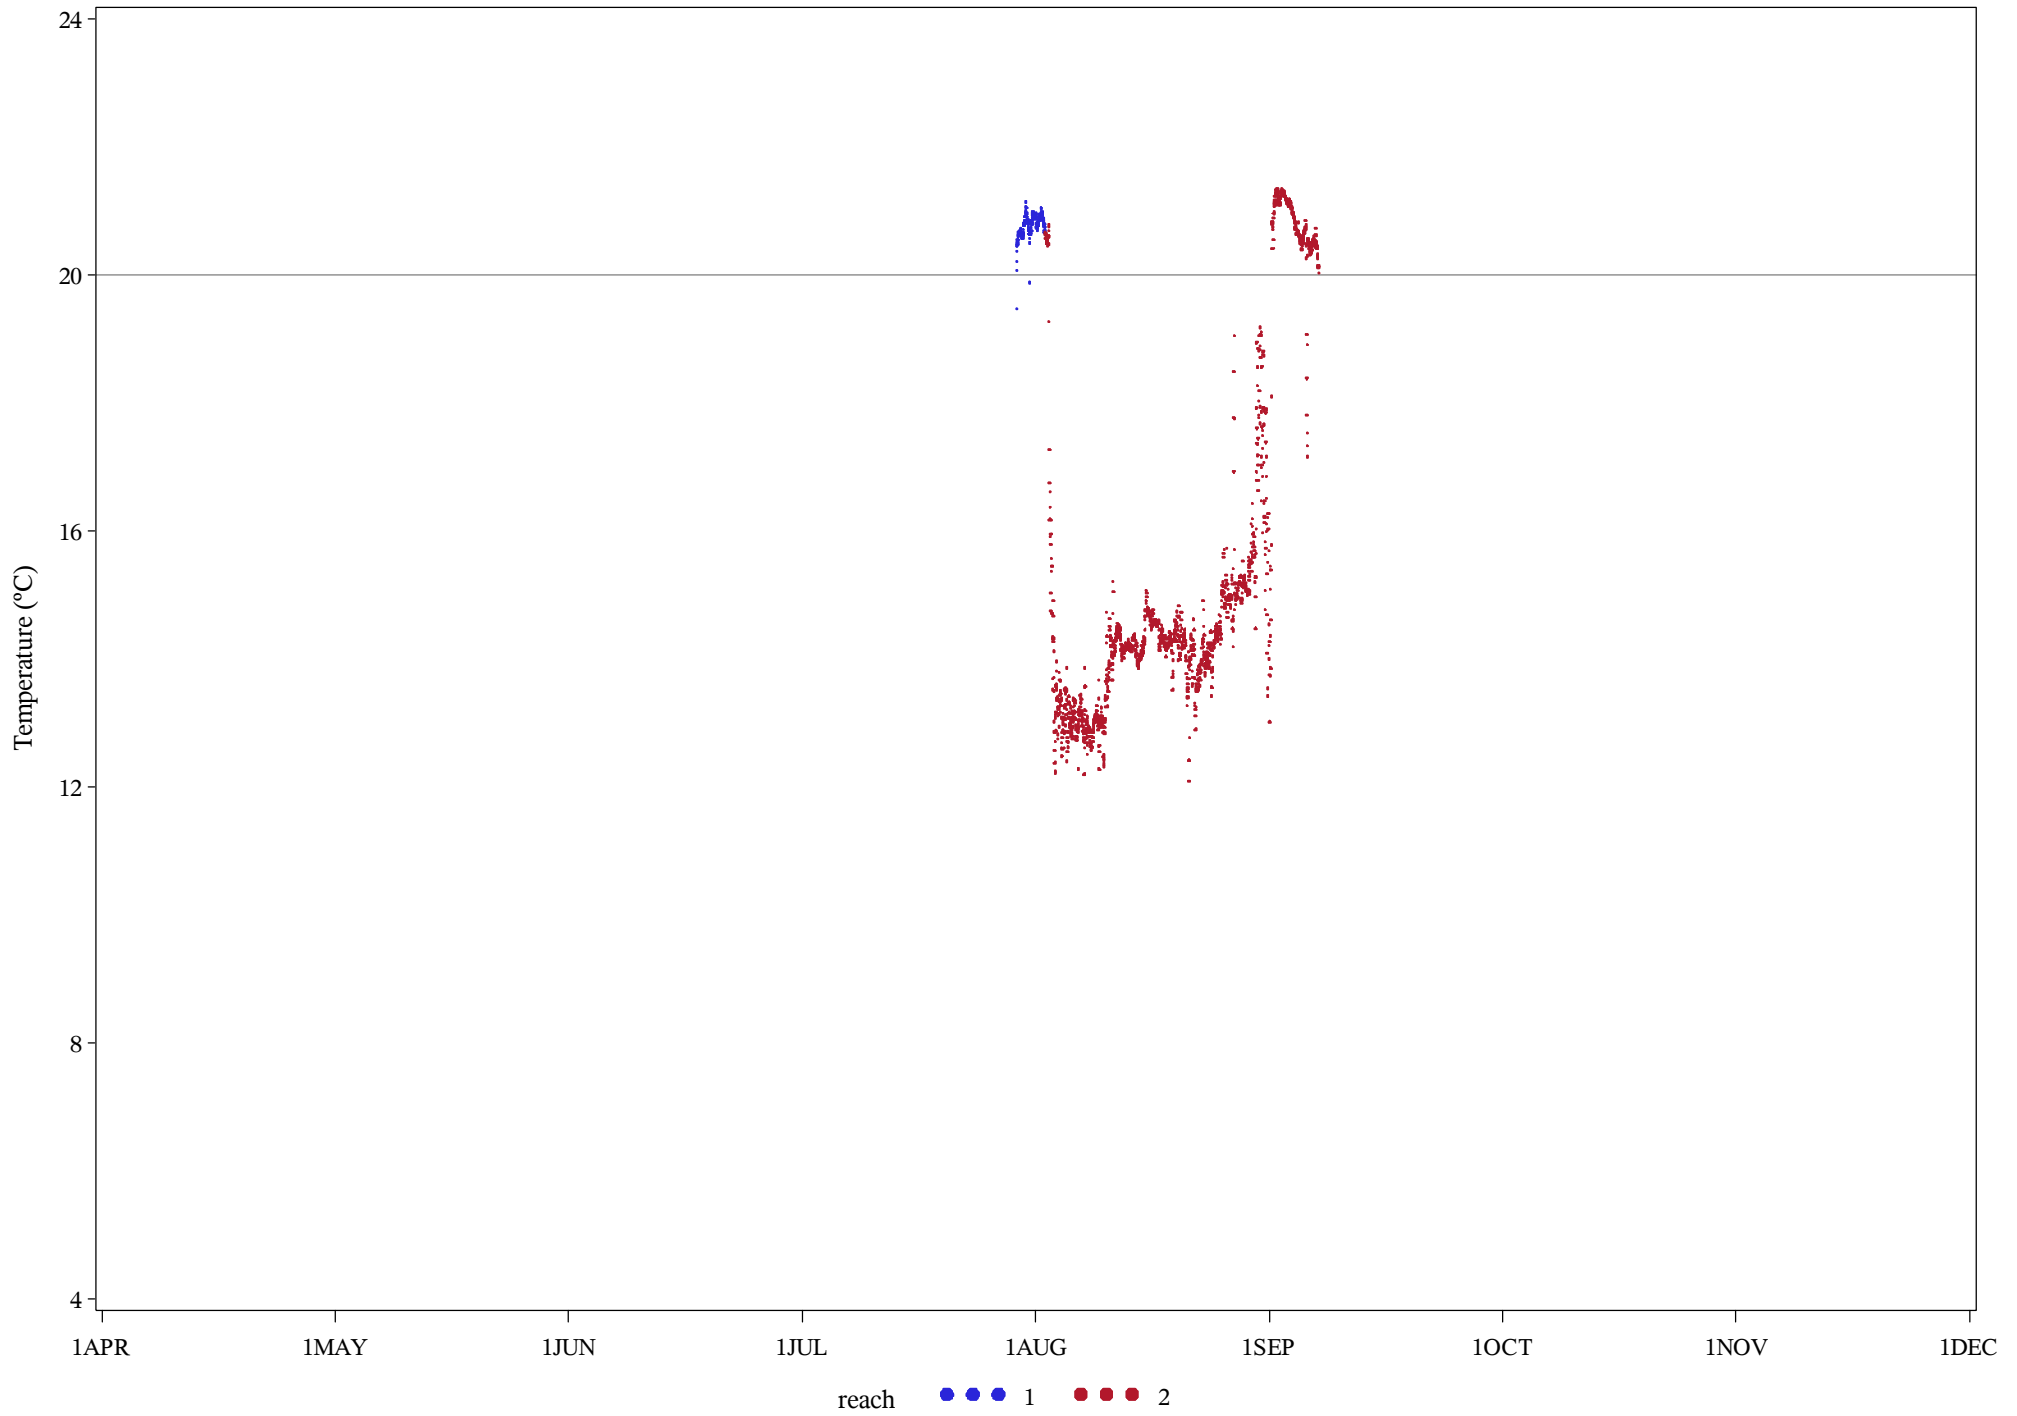

# Steelhead 4942A

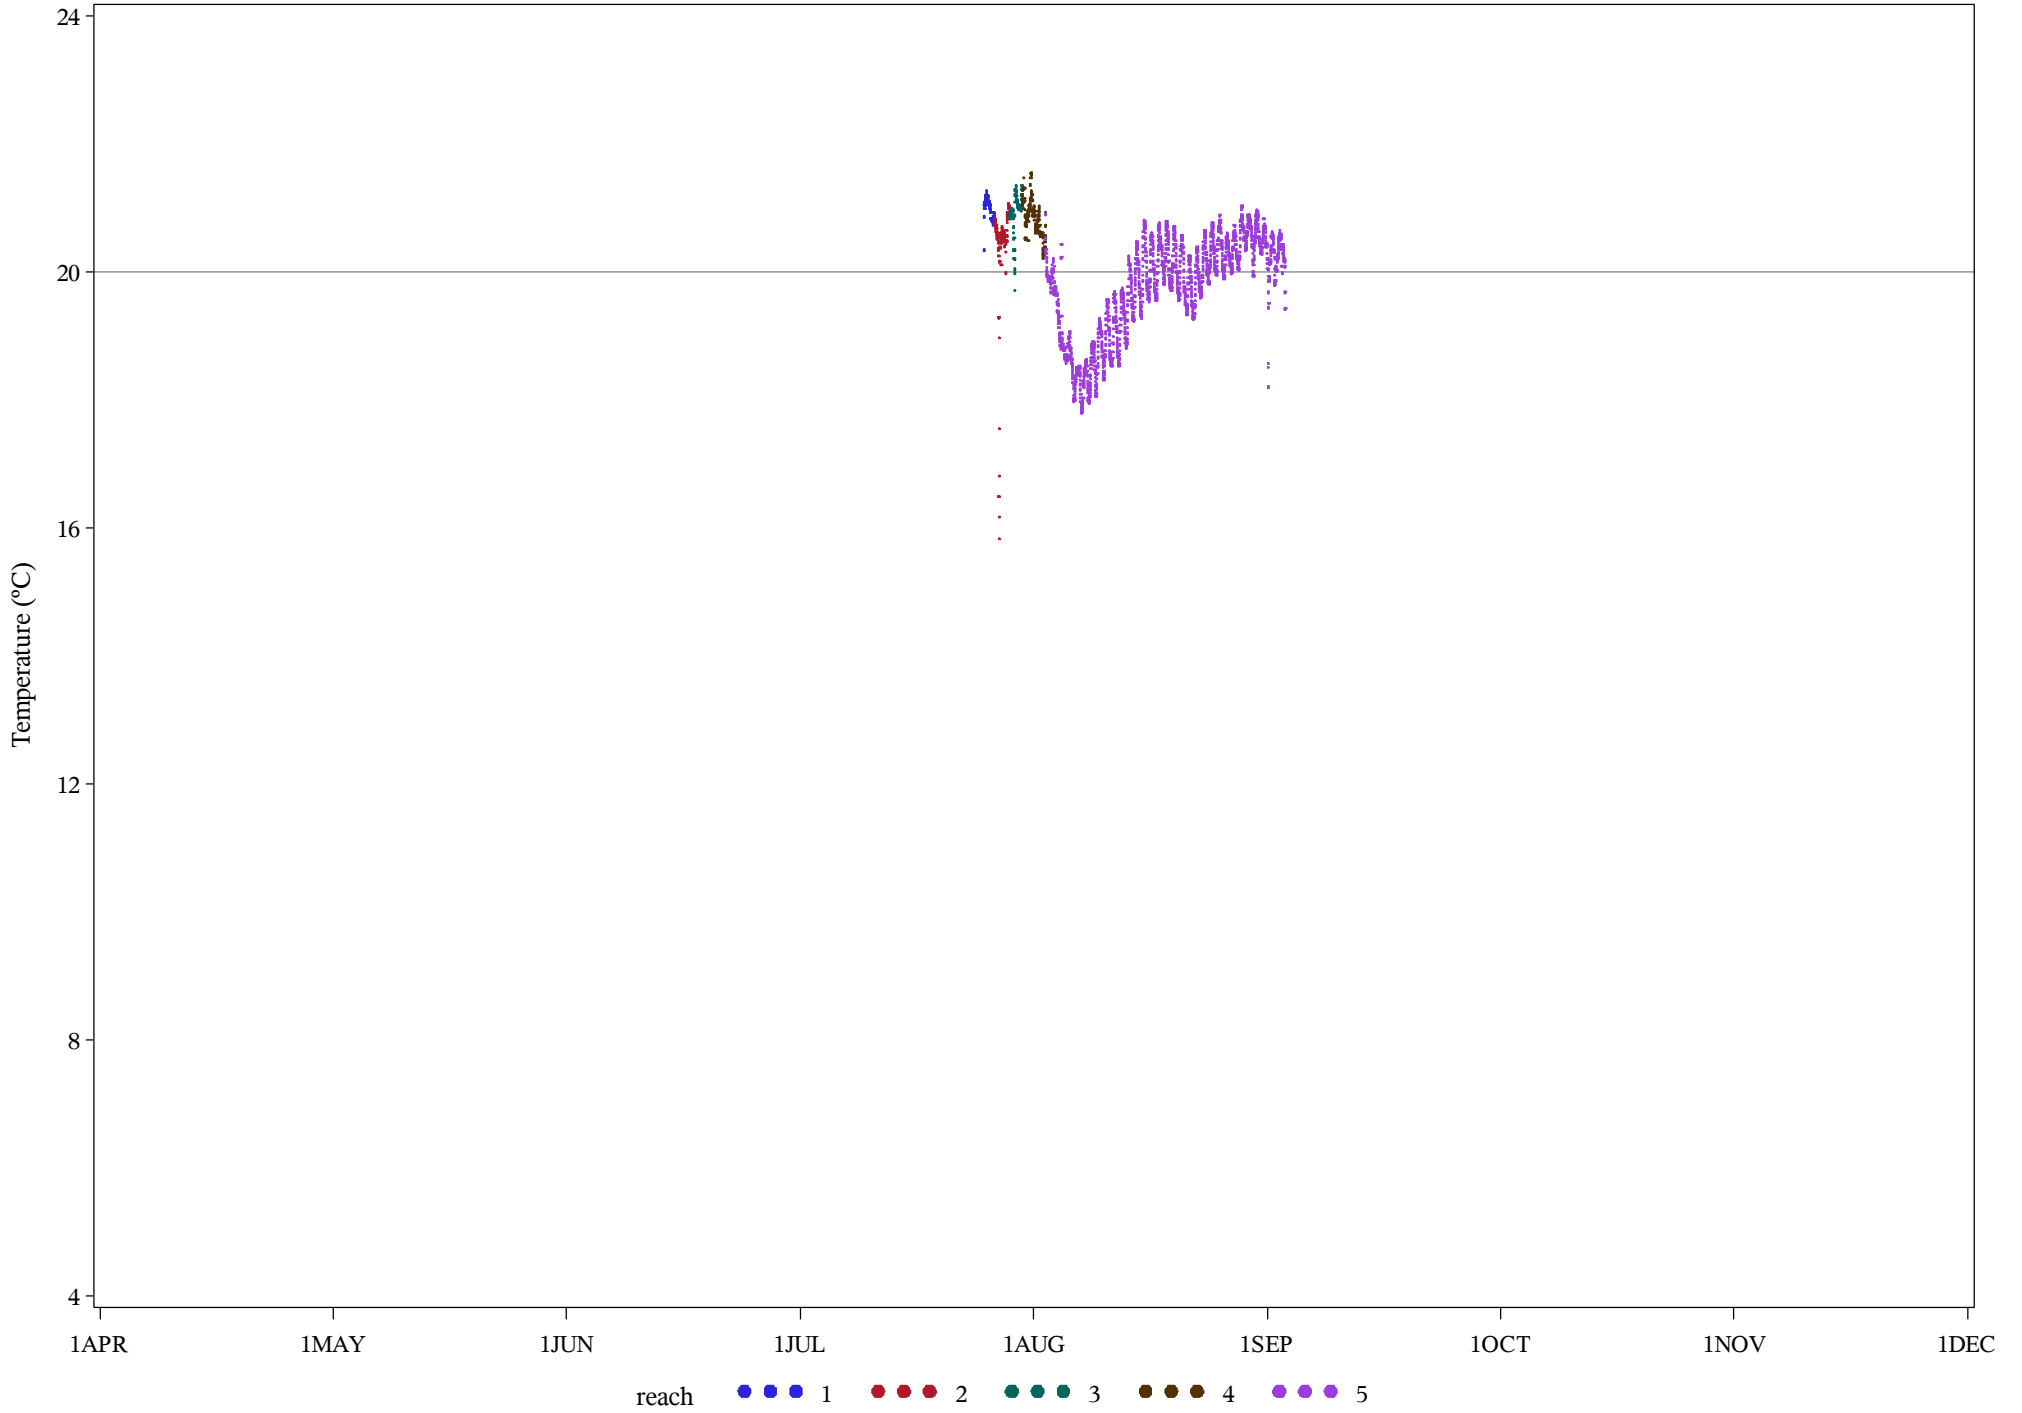

# Steelhead 4943A

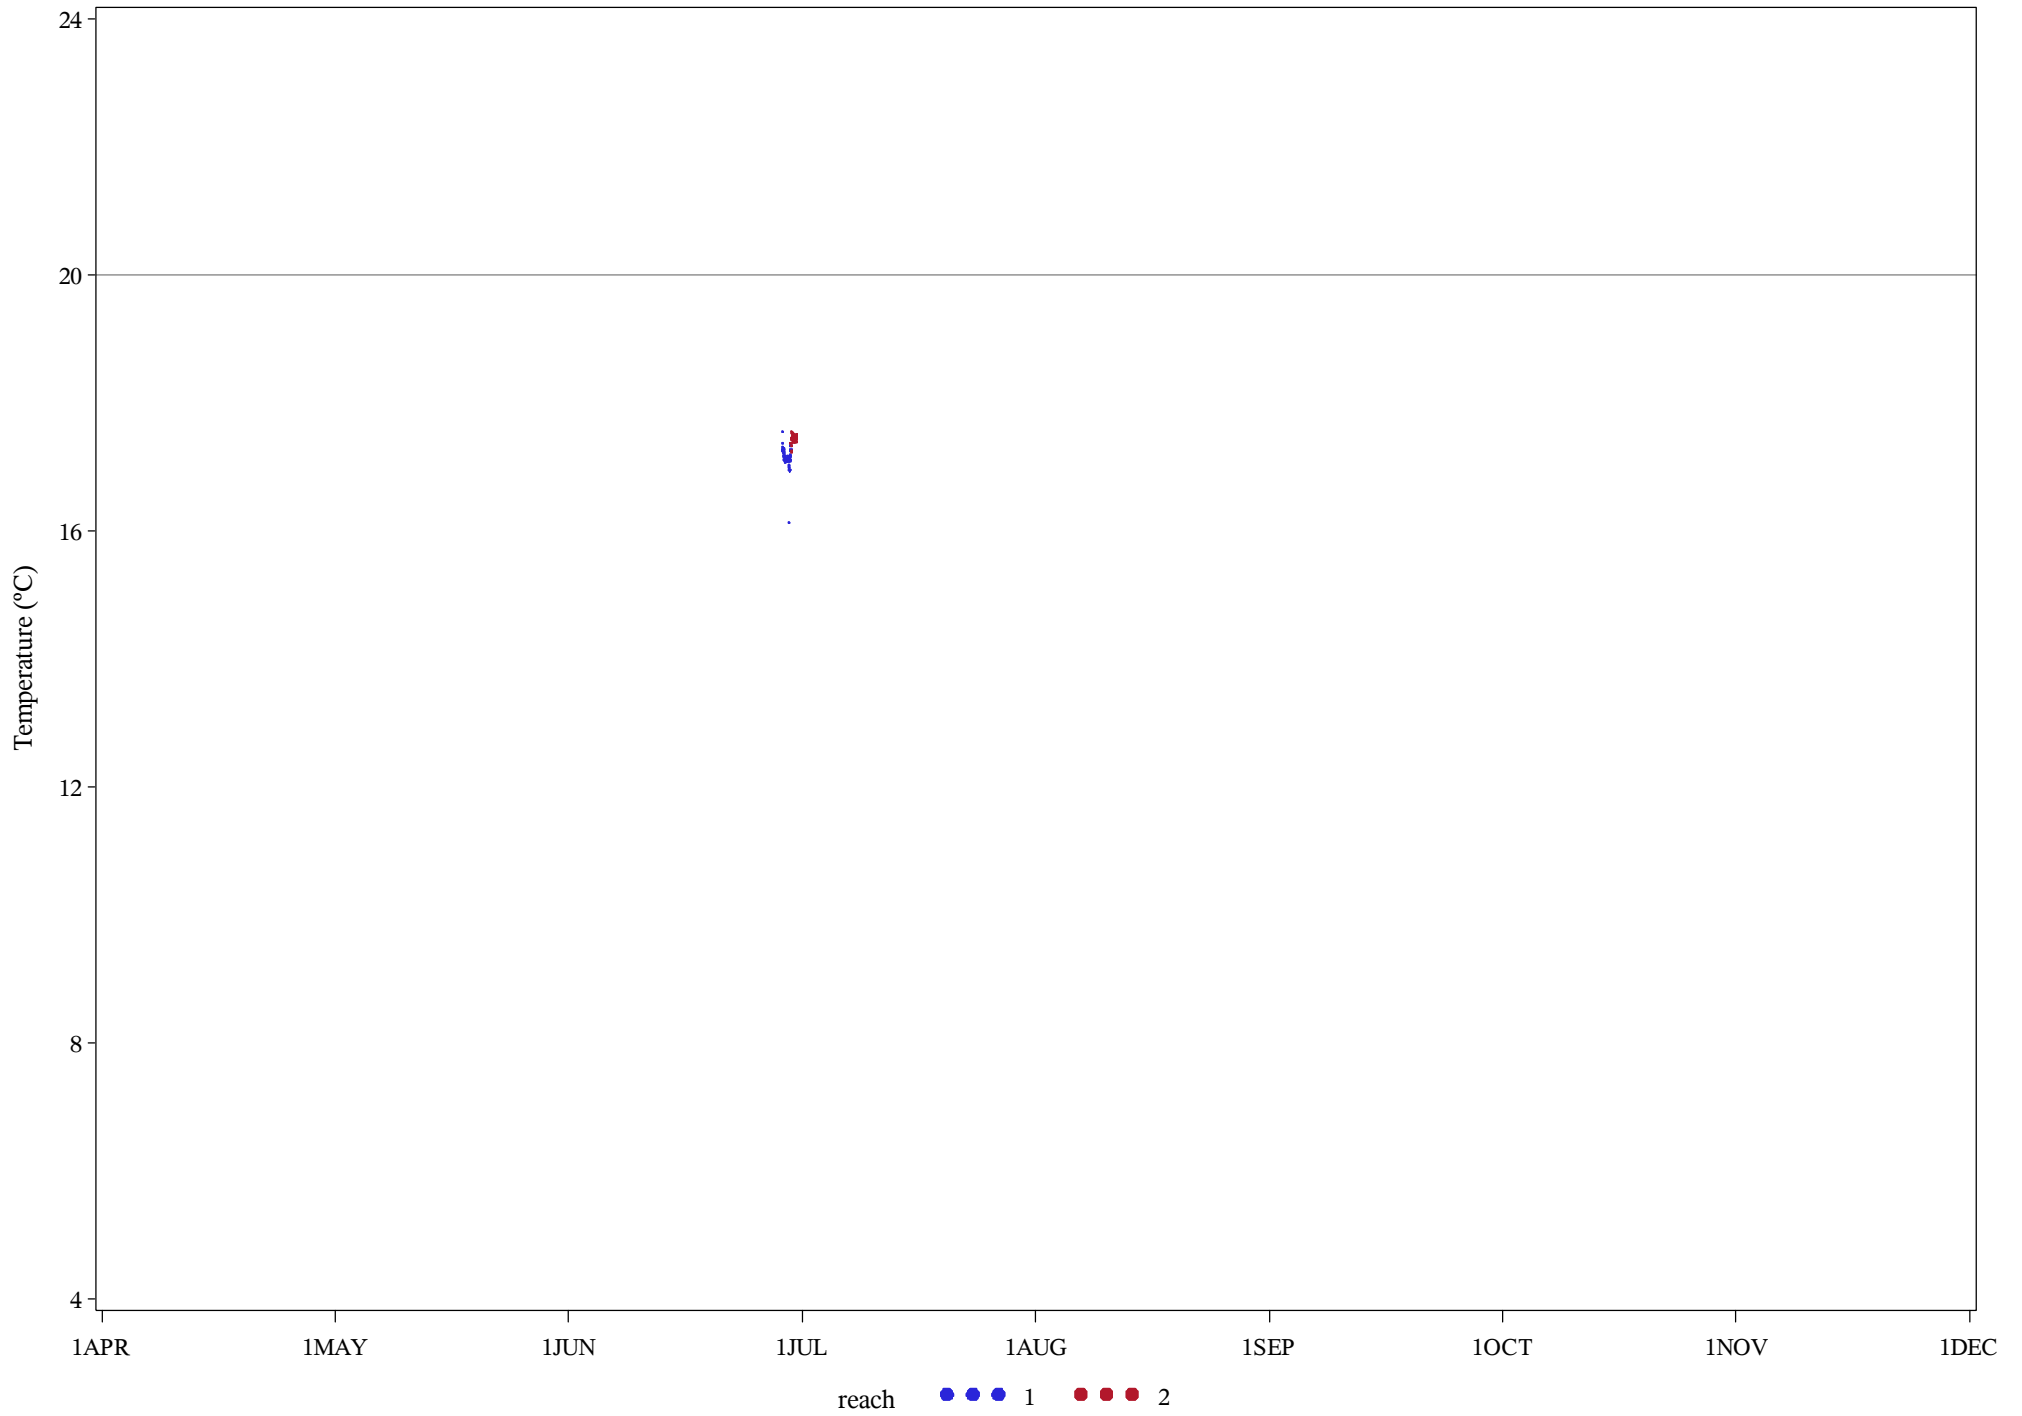

# Steelhead 4944A

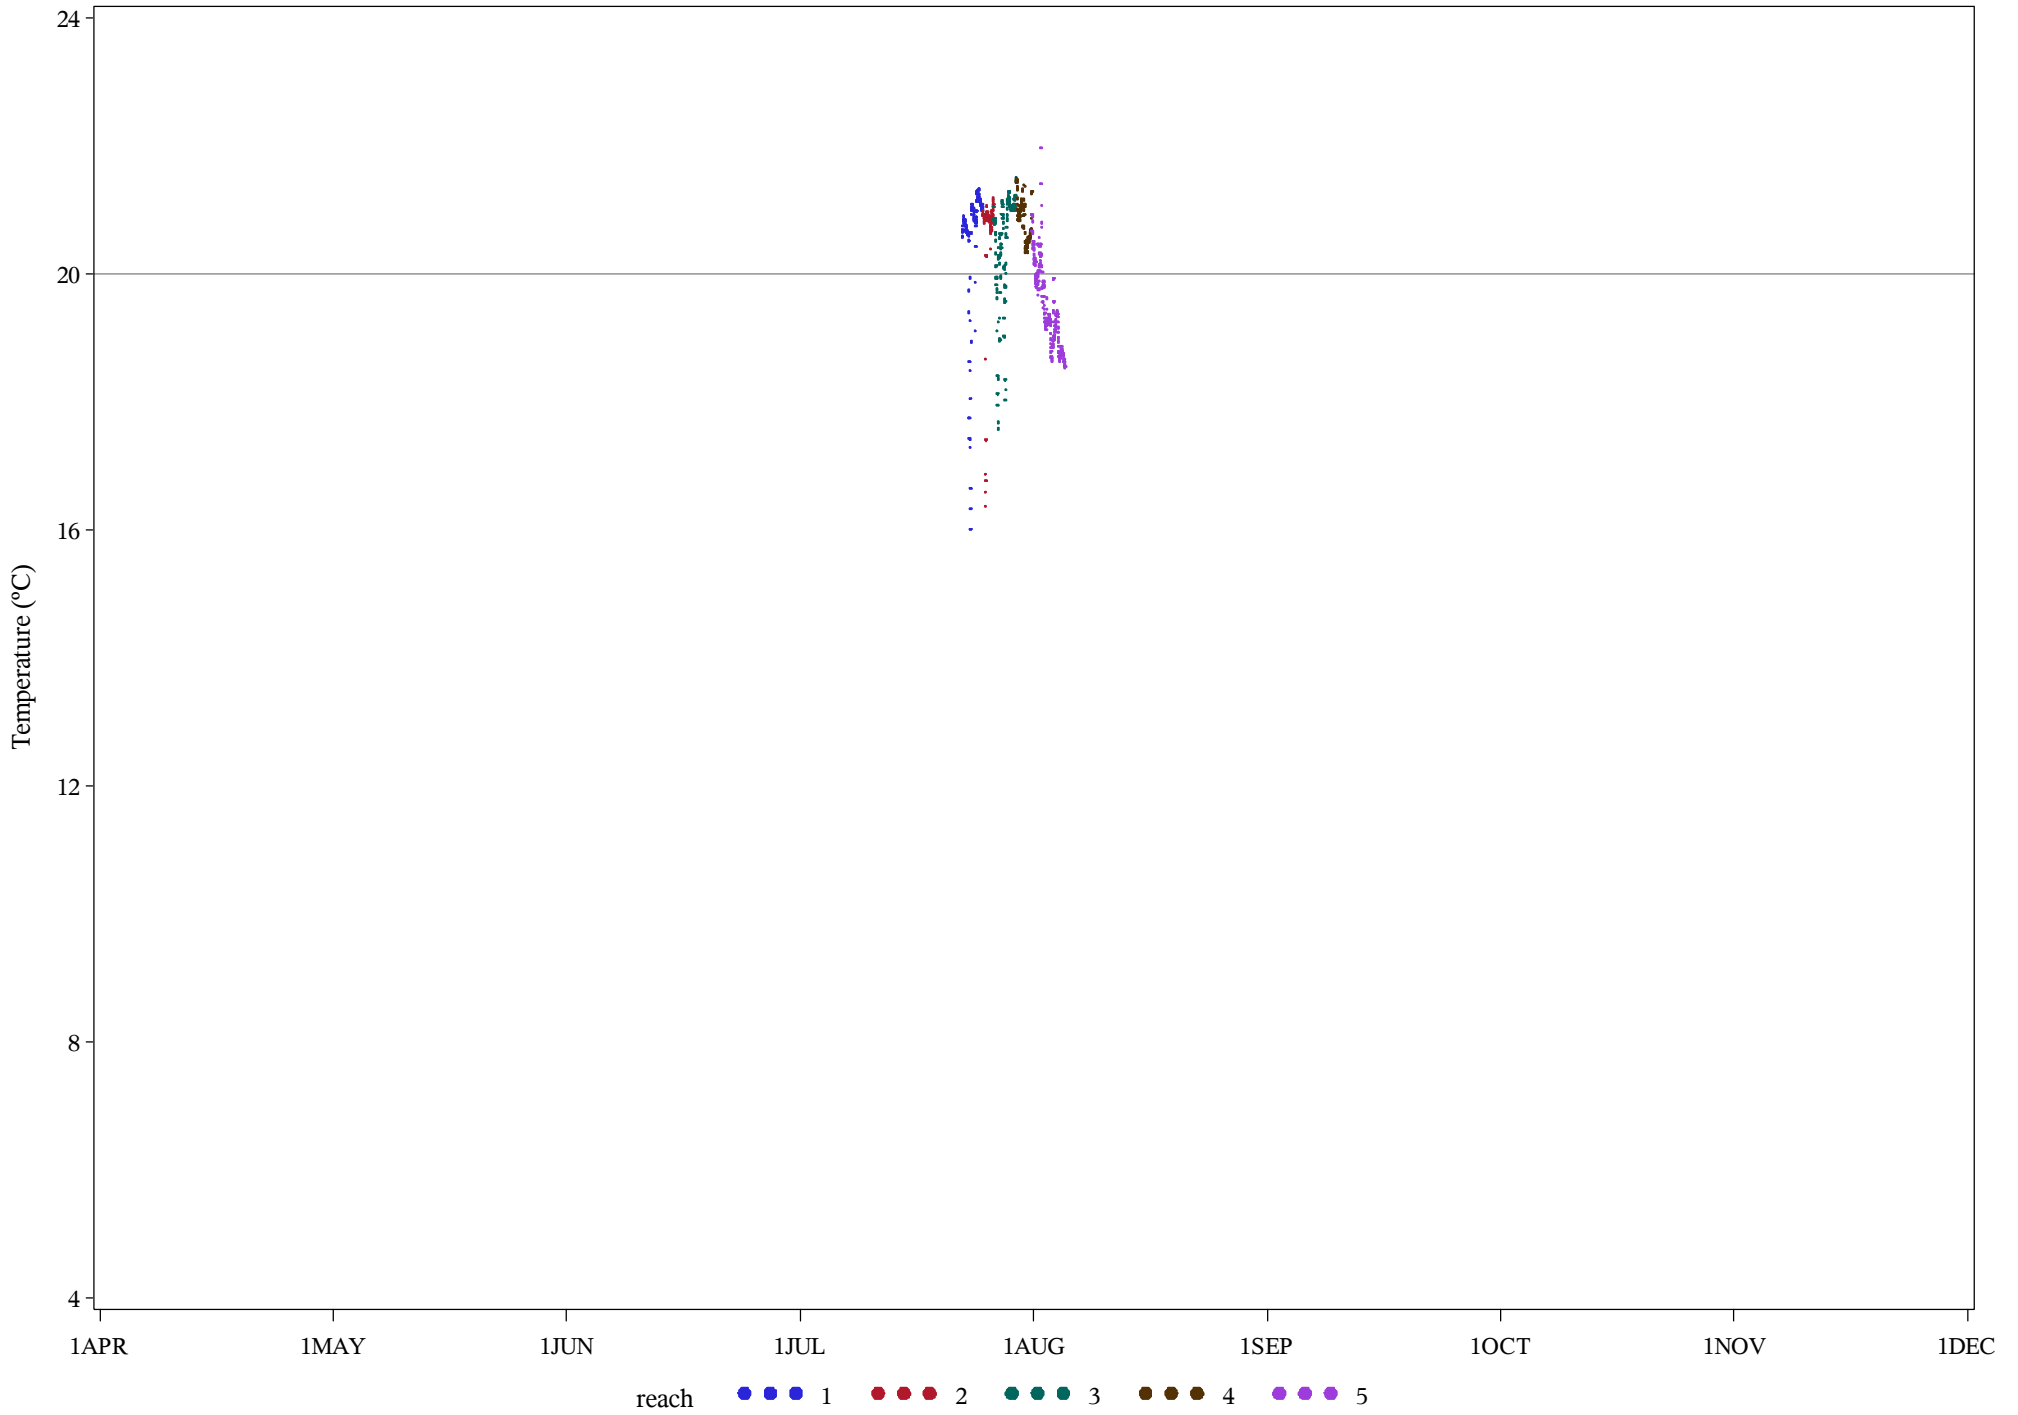

# Steelhead 4947A

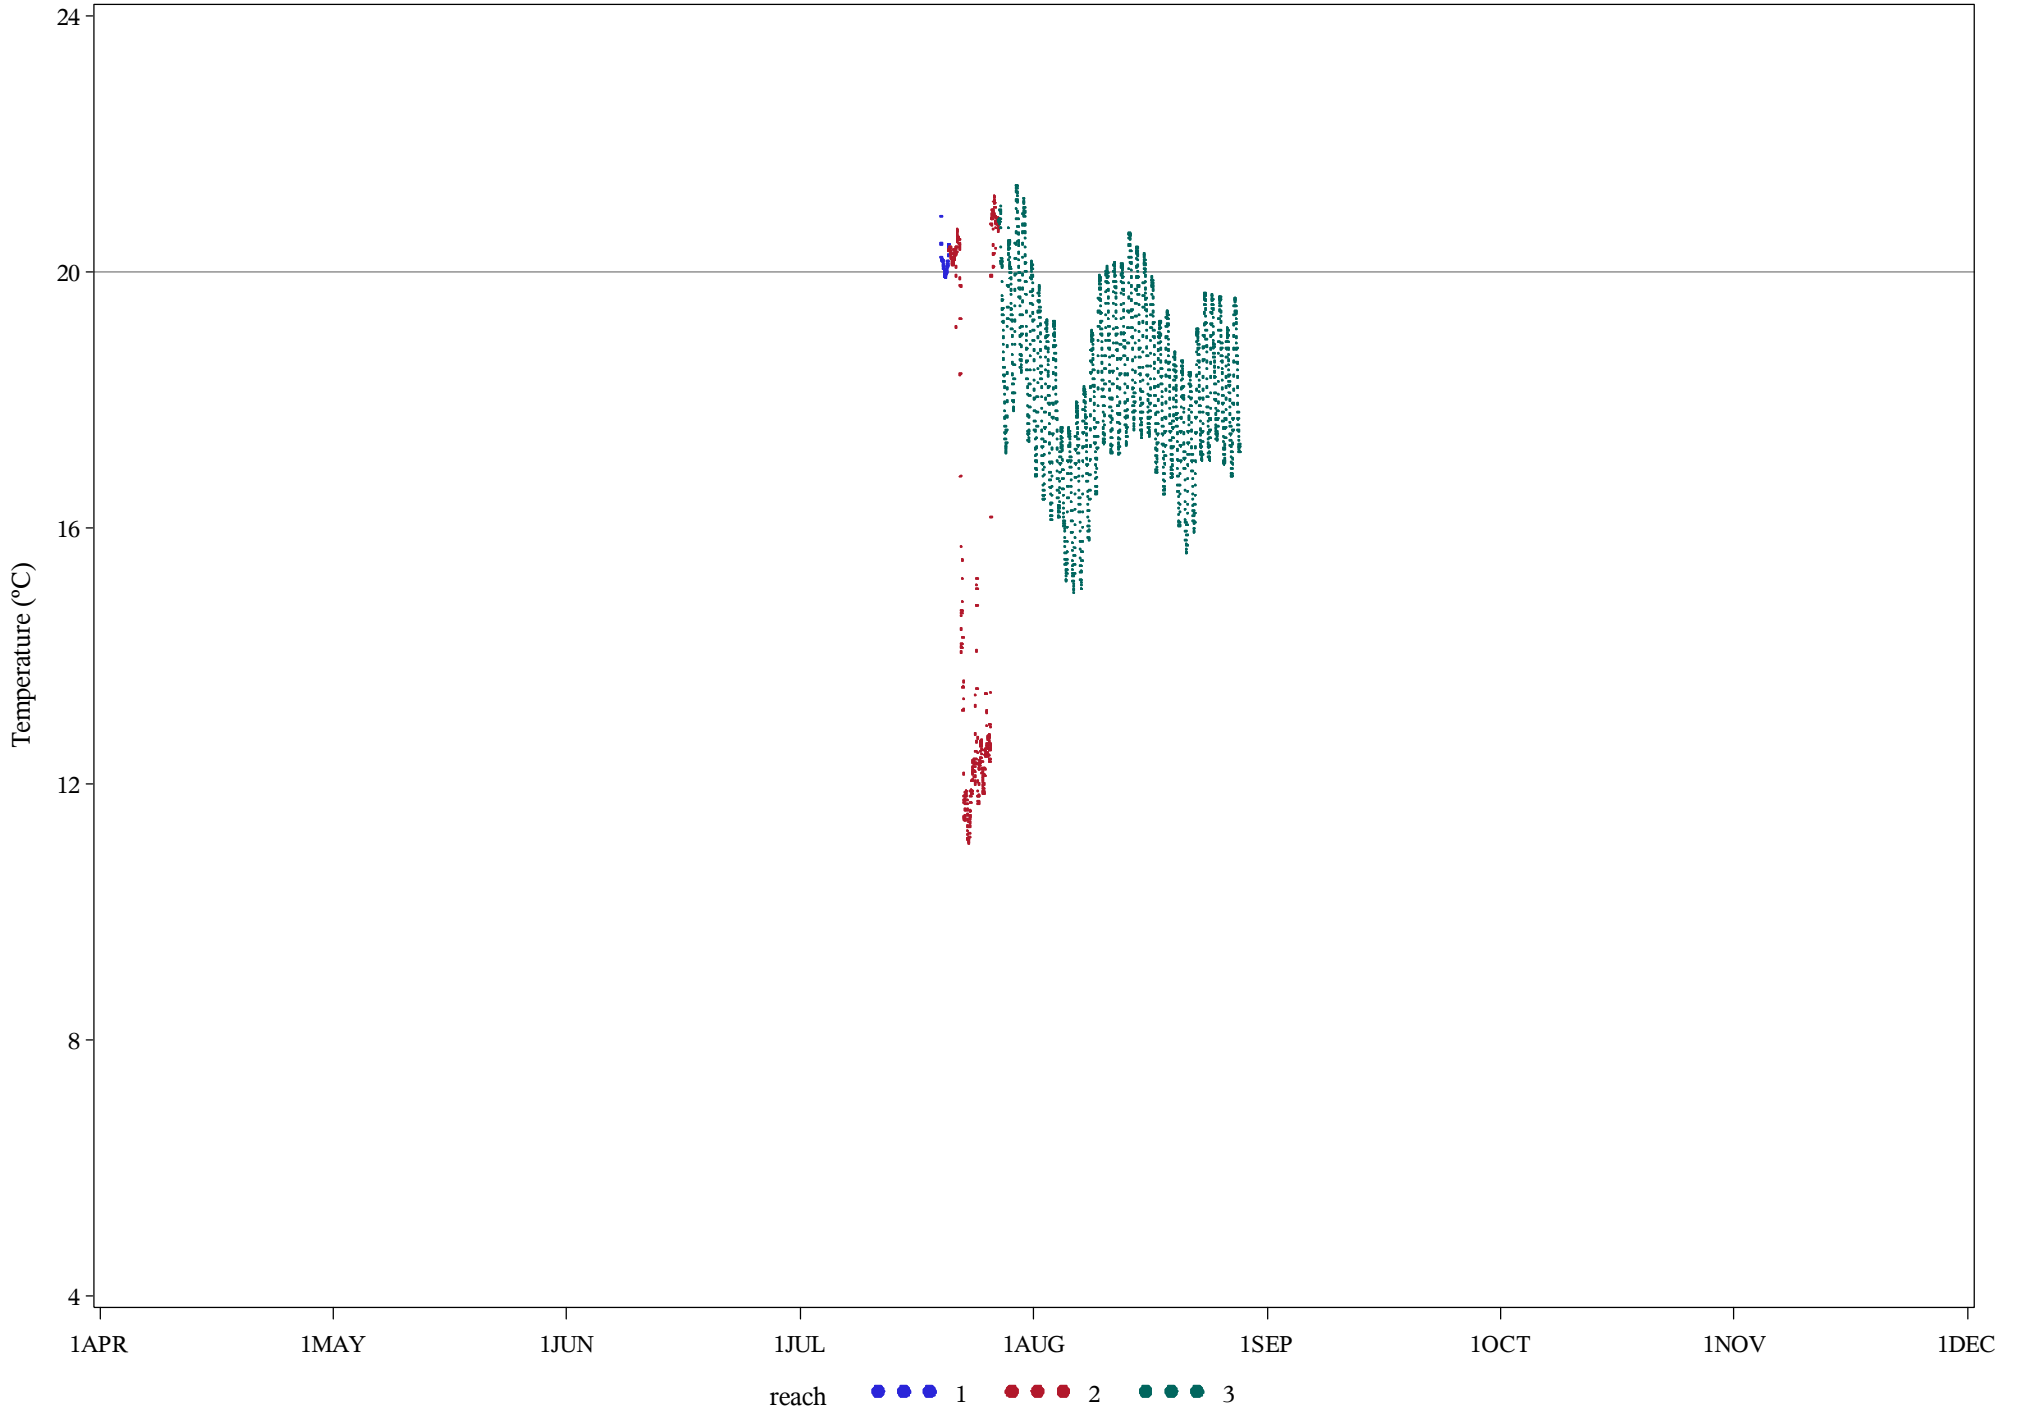



# Steelhead 4949B

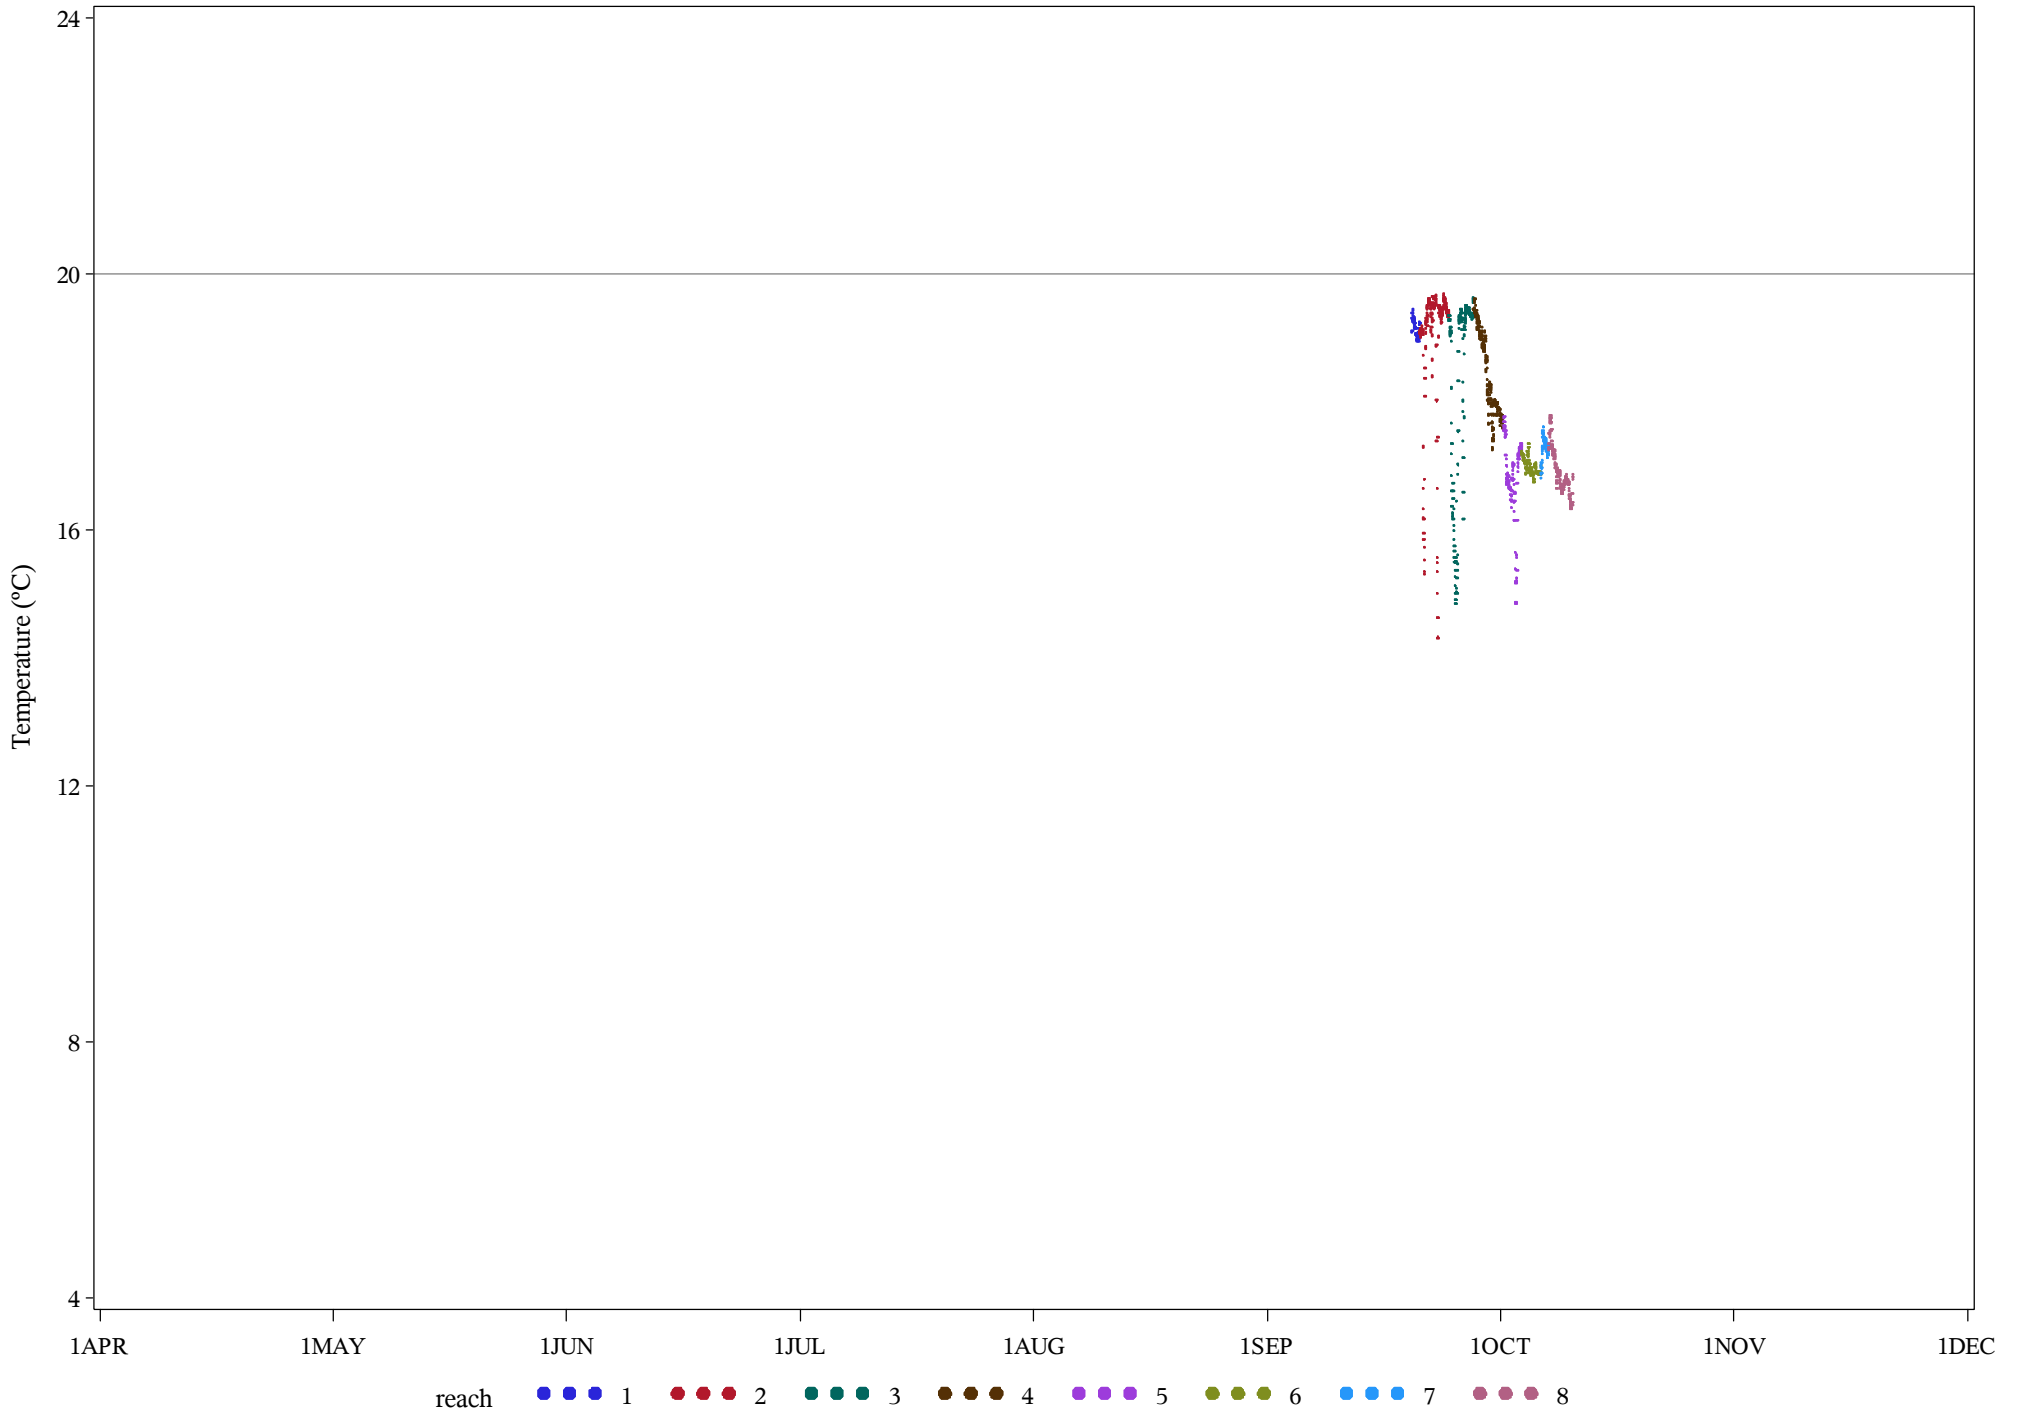



# Steelhead 4958B

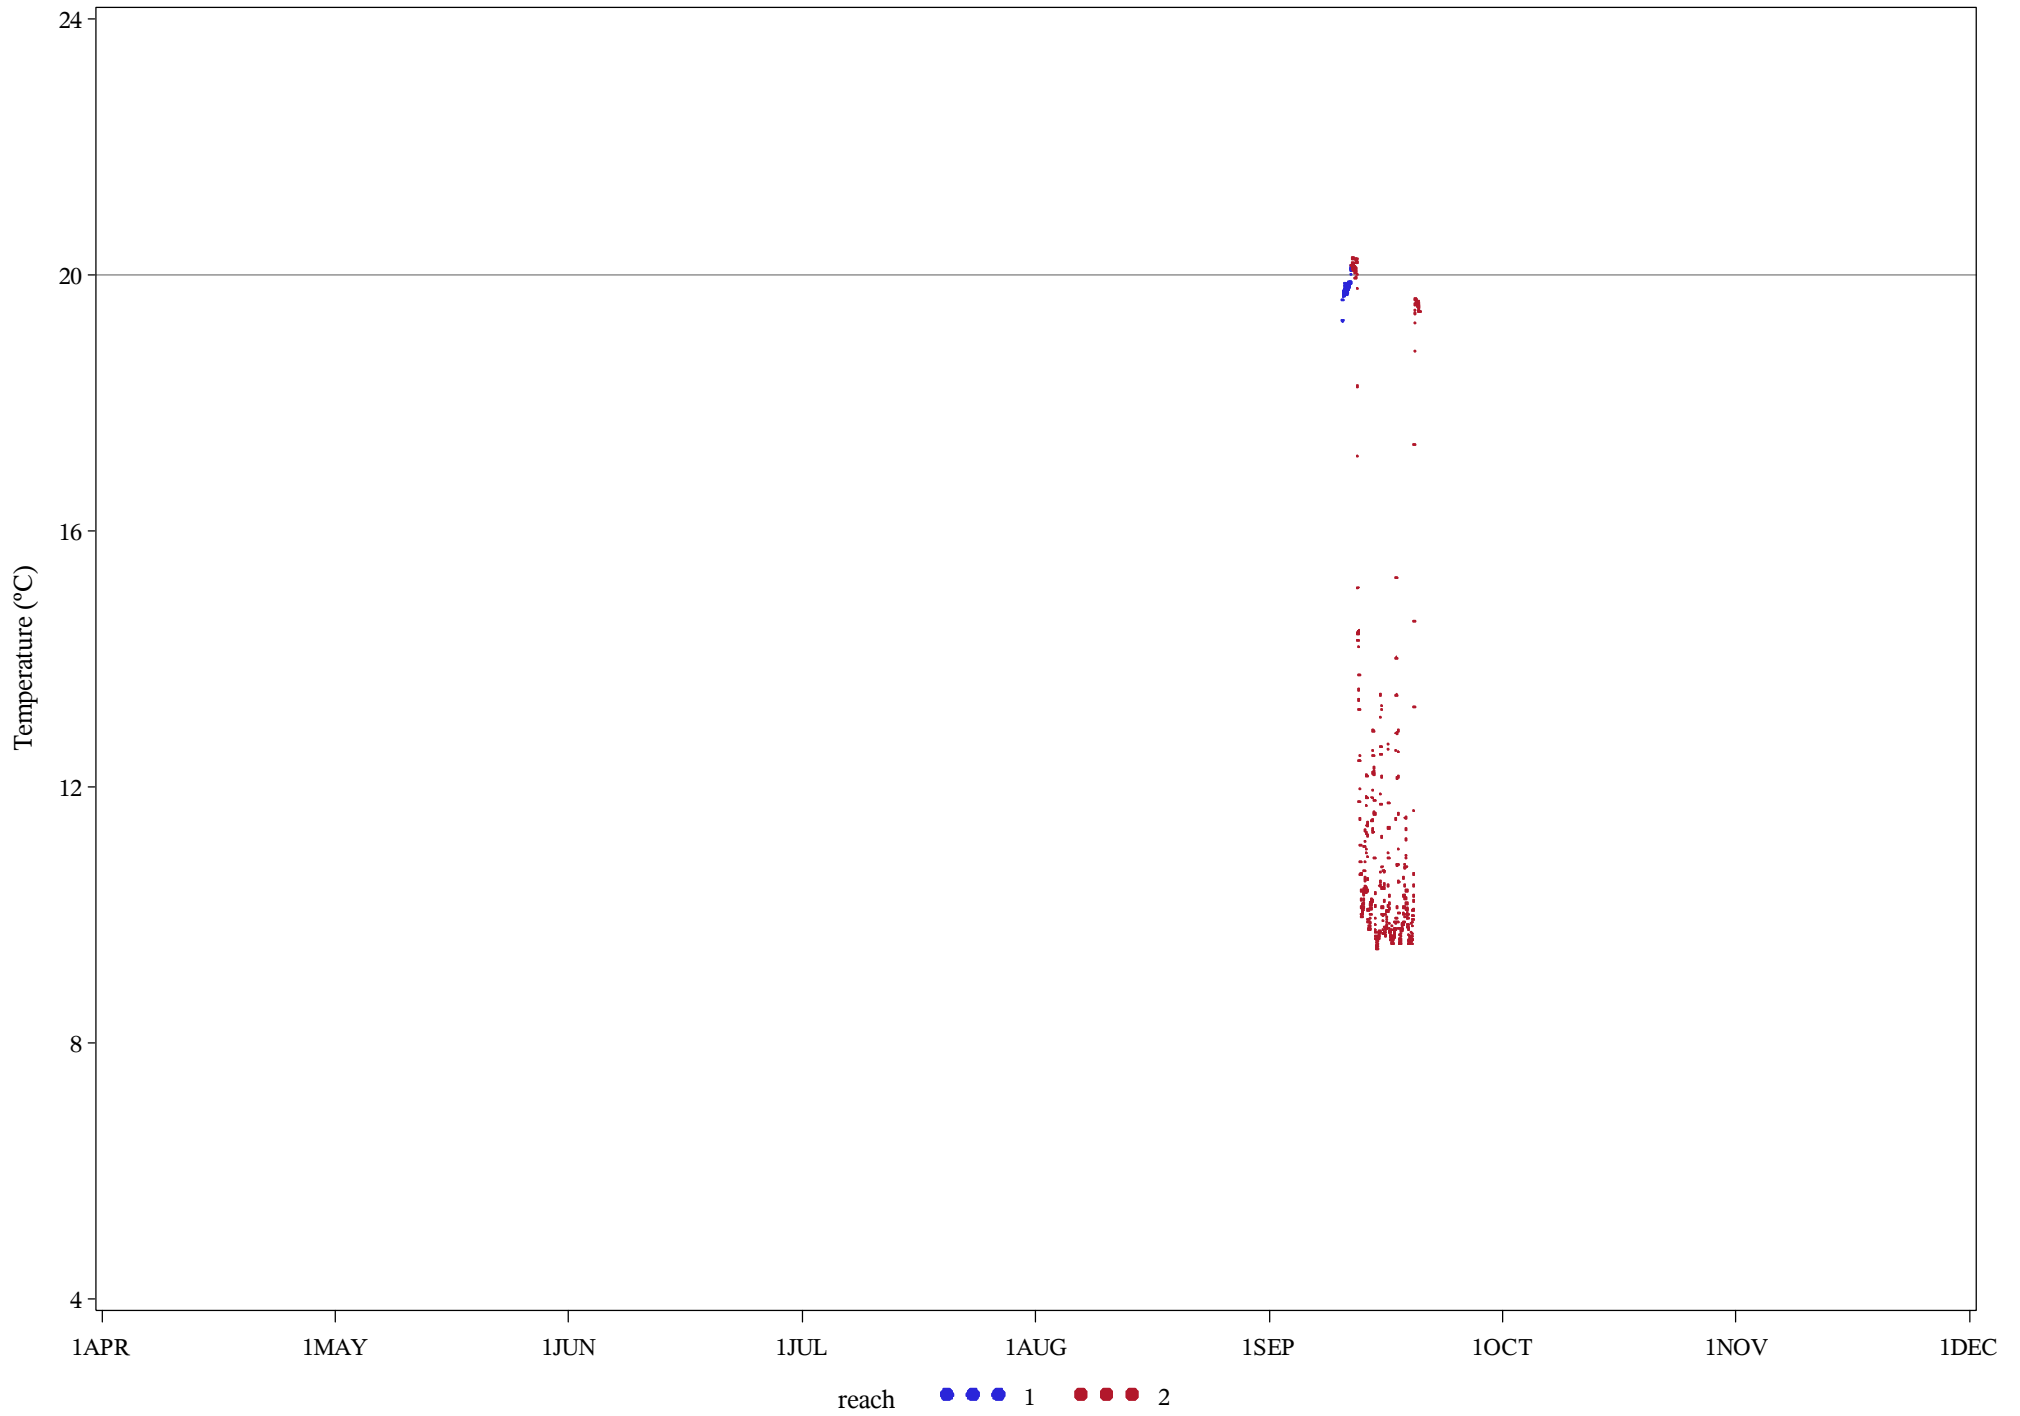

# Steelhead 4960A

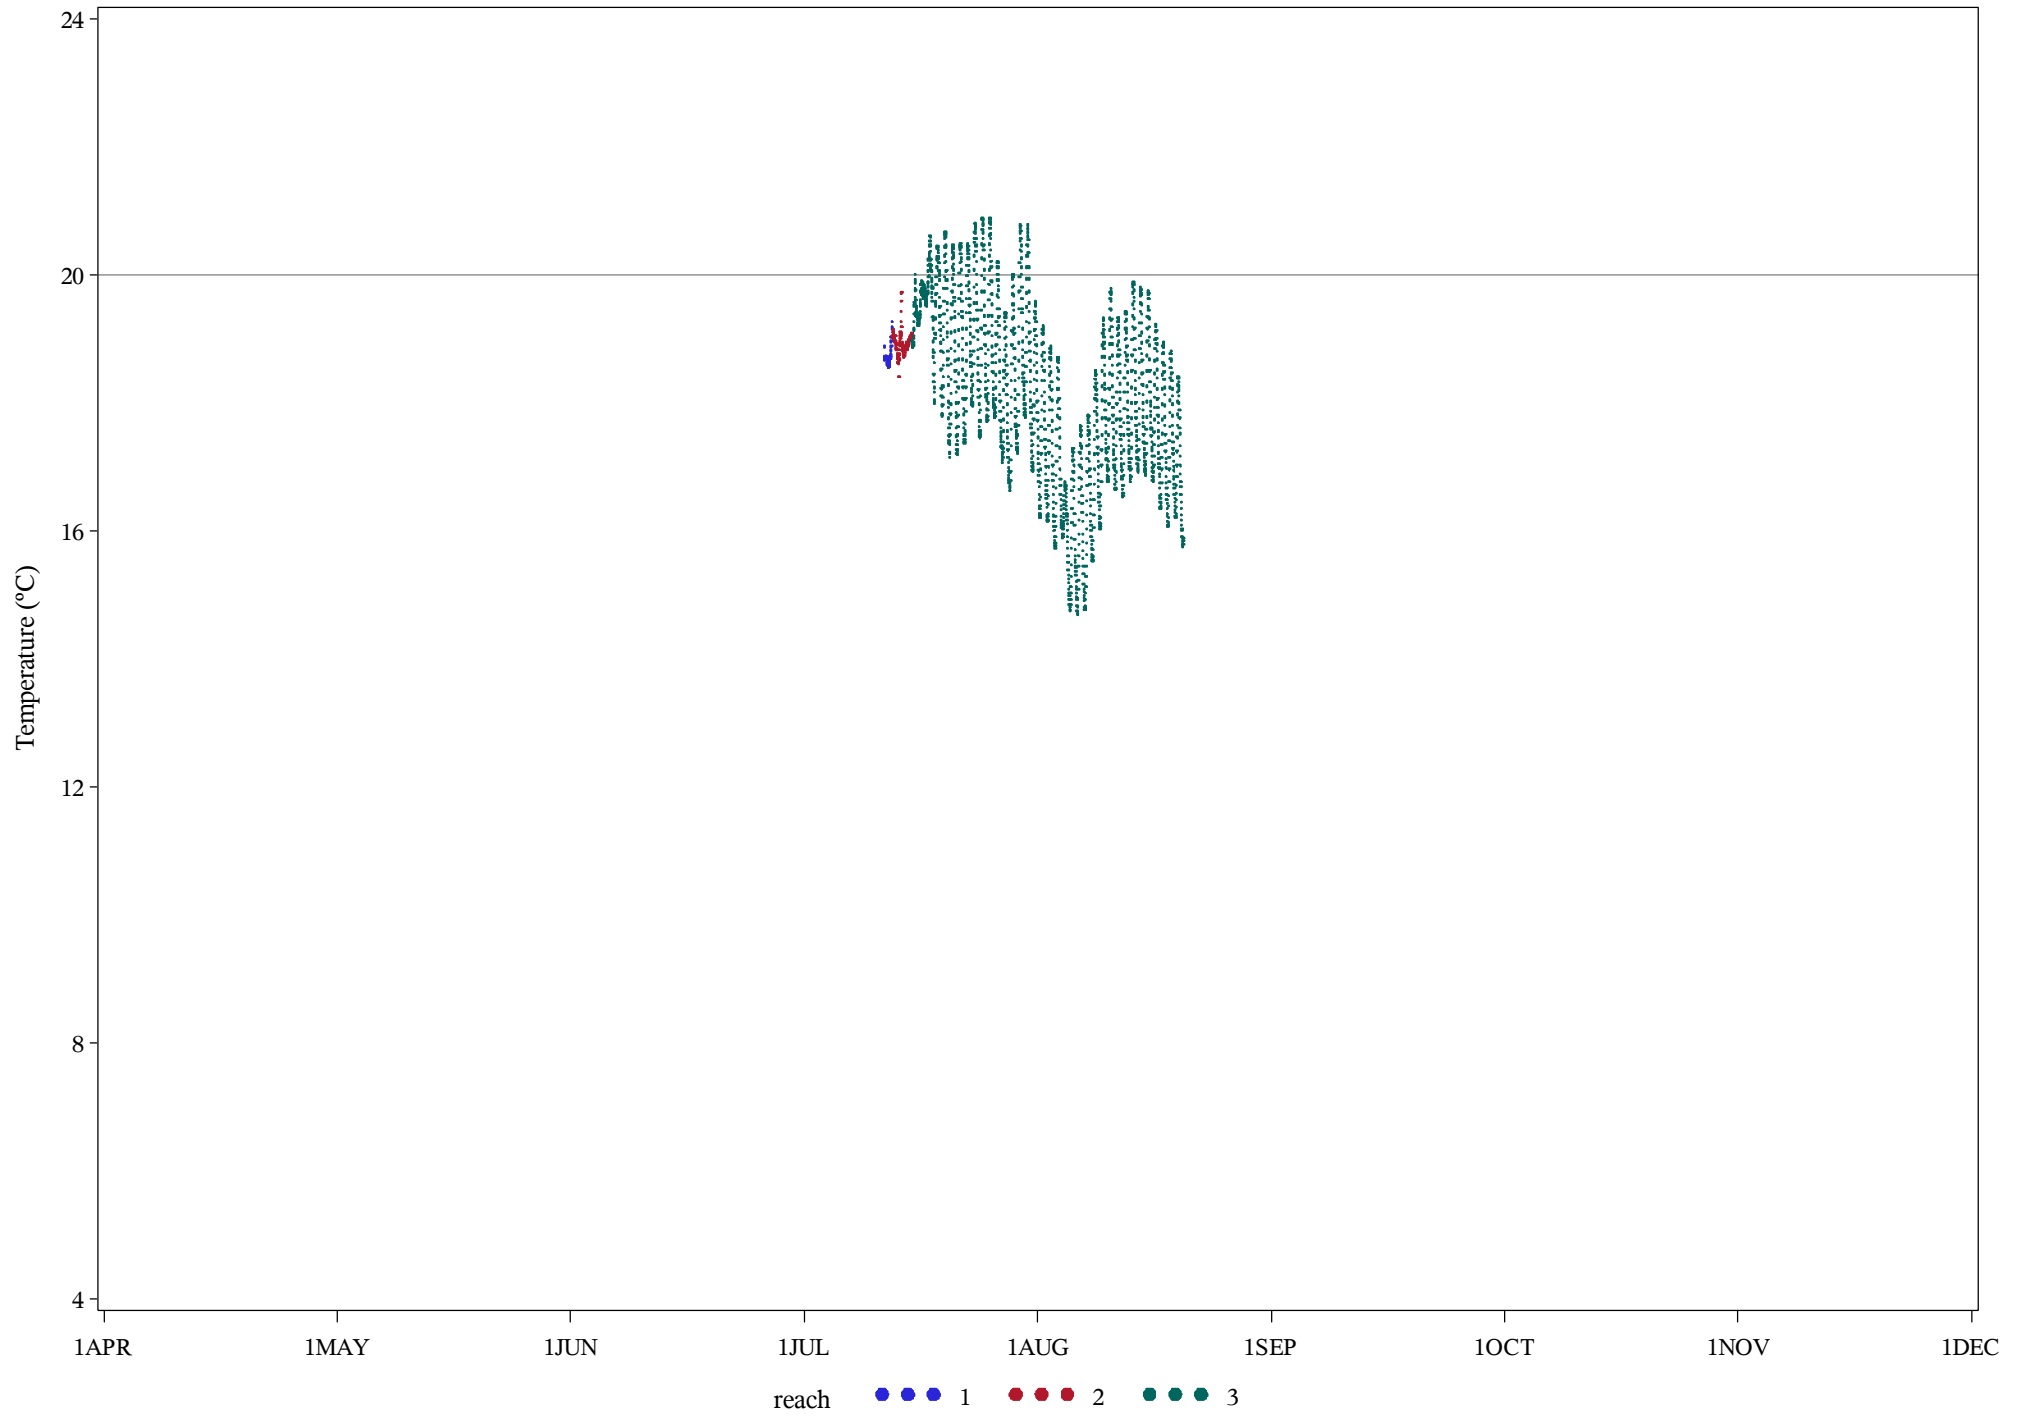

# Steelhead 4962A

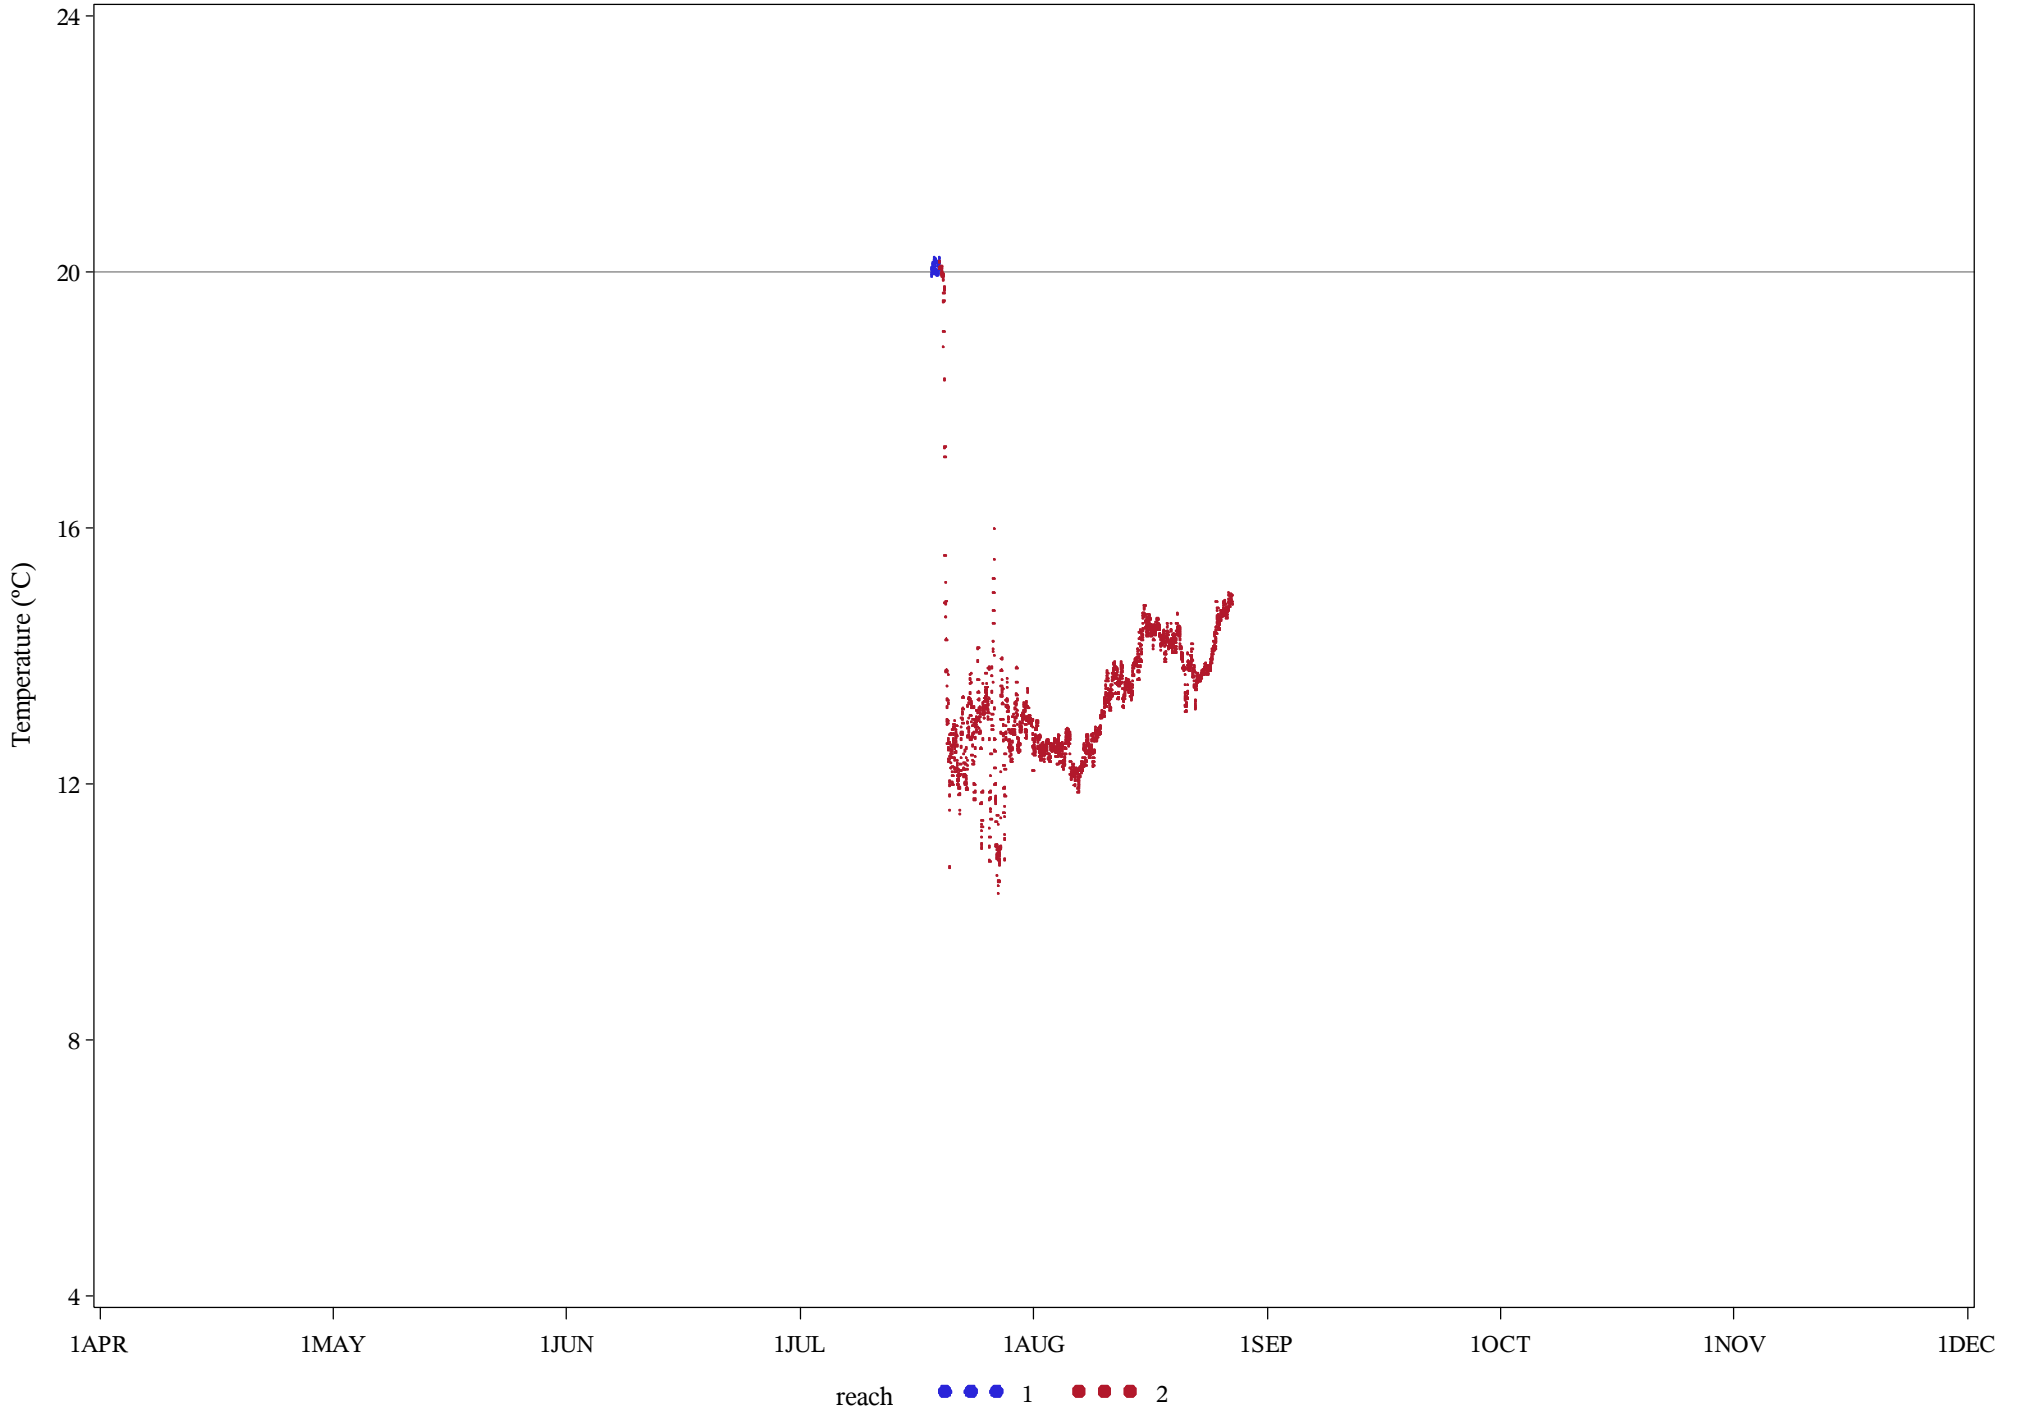

# Steelhead 4966A

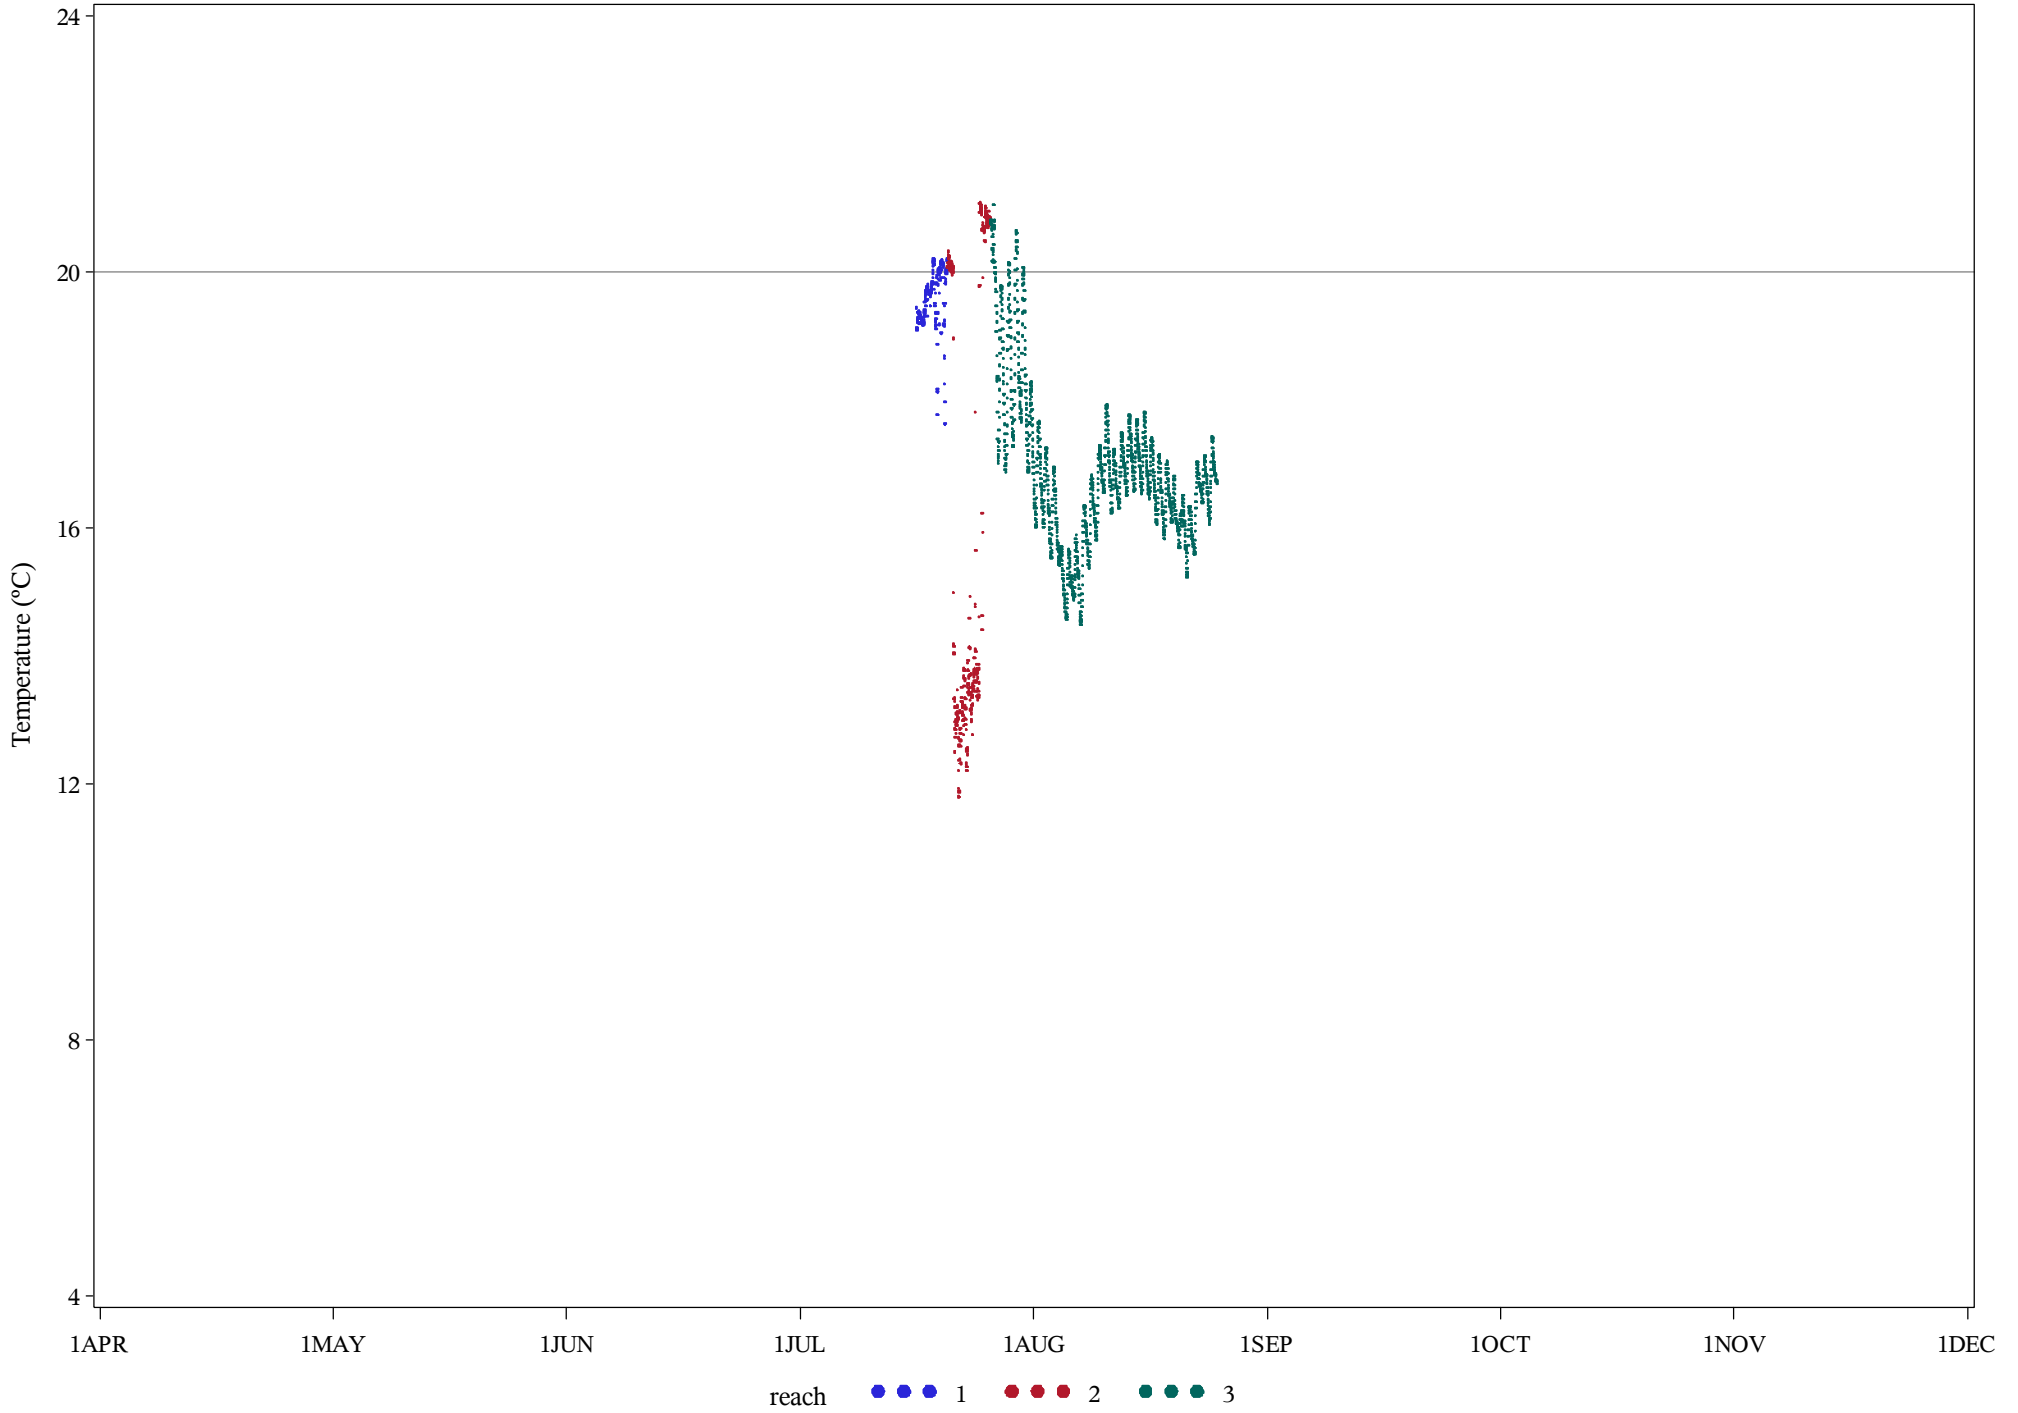

# Steelhead 4968A

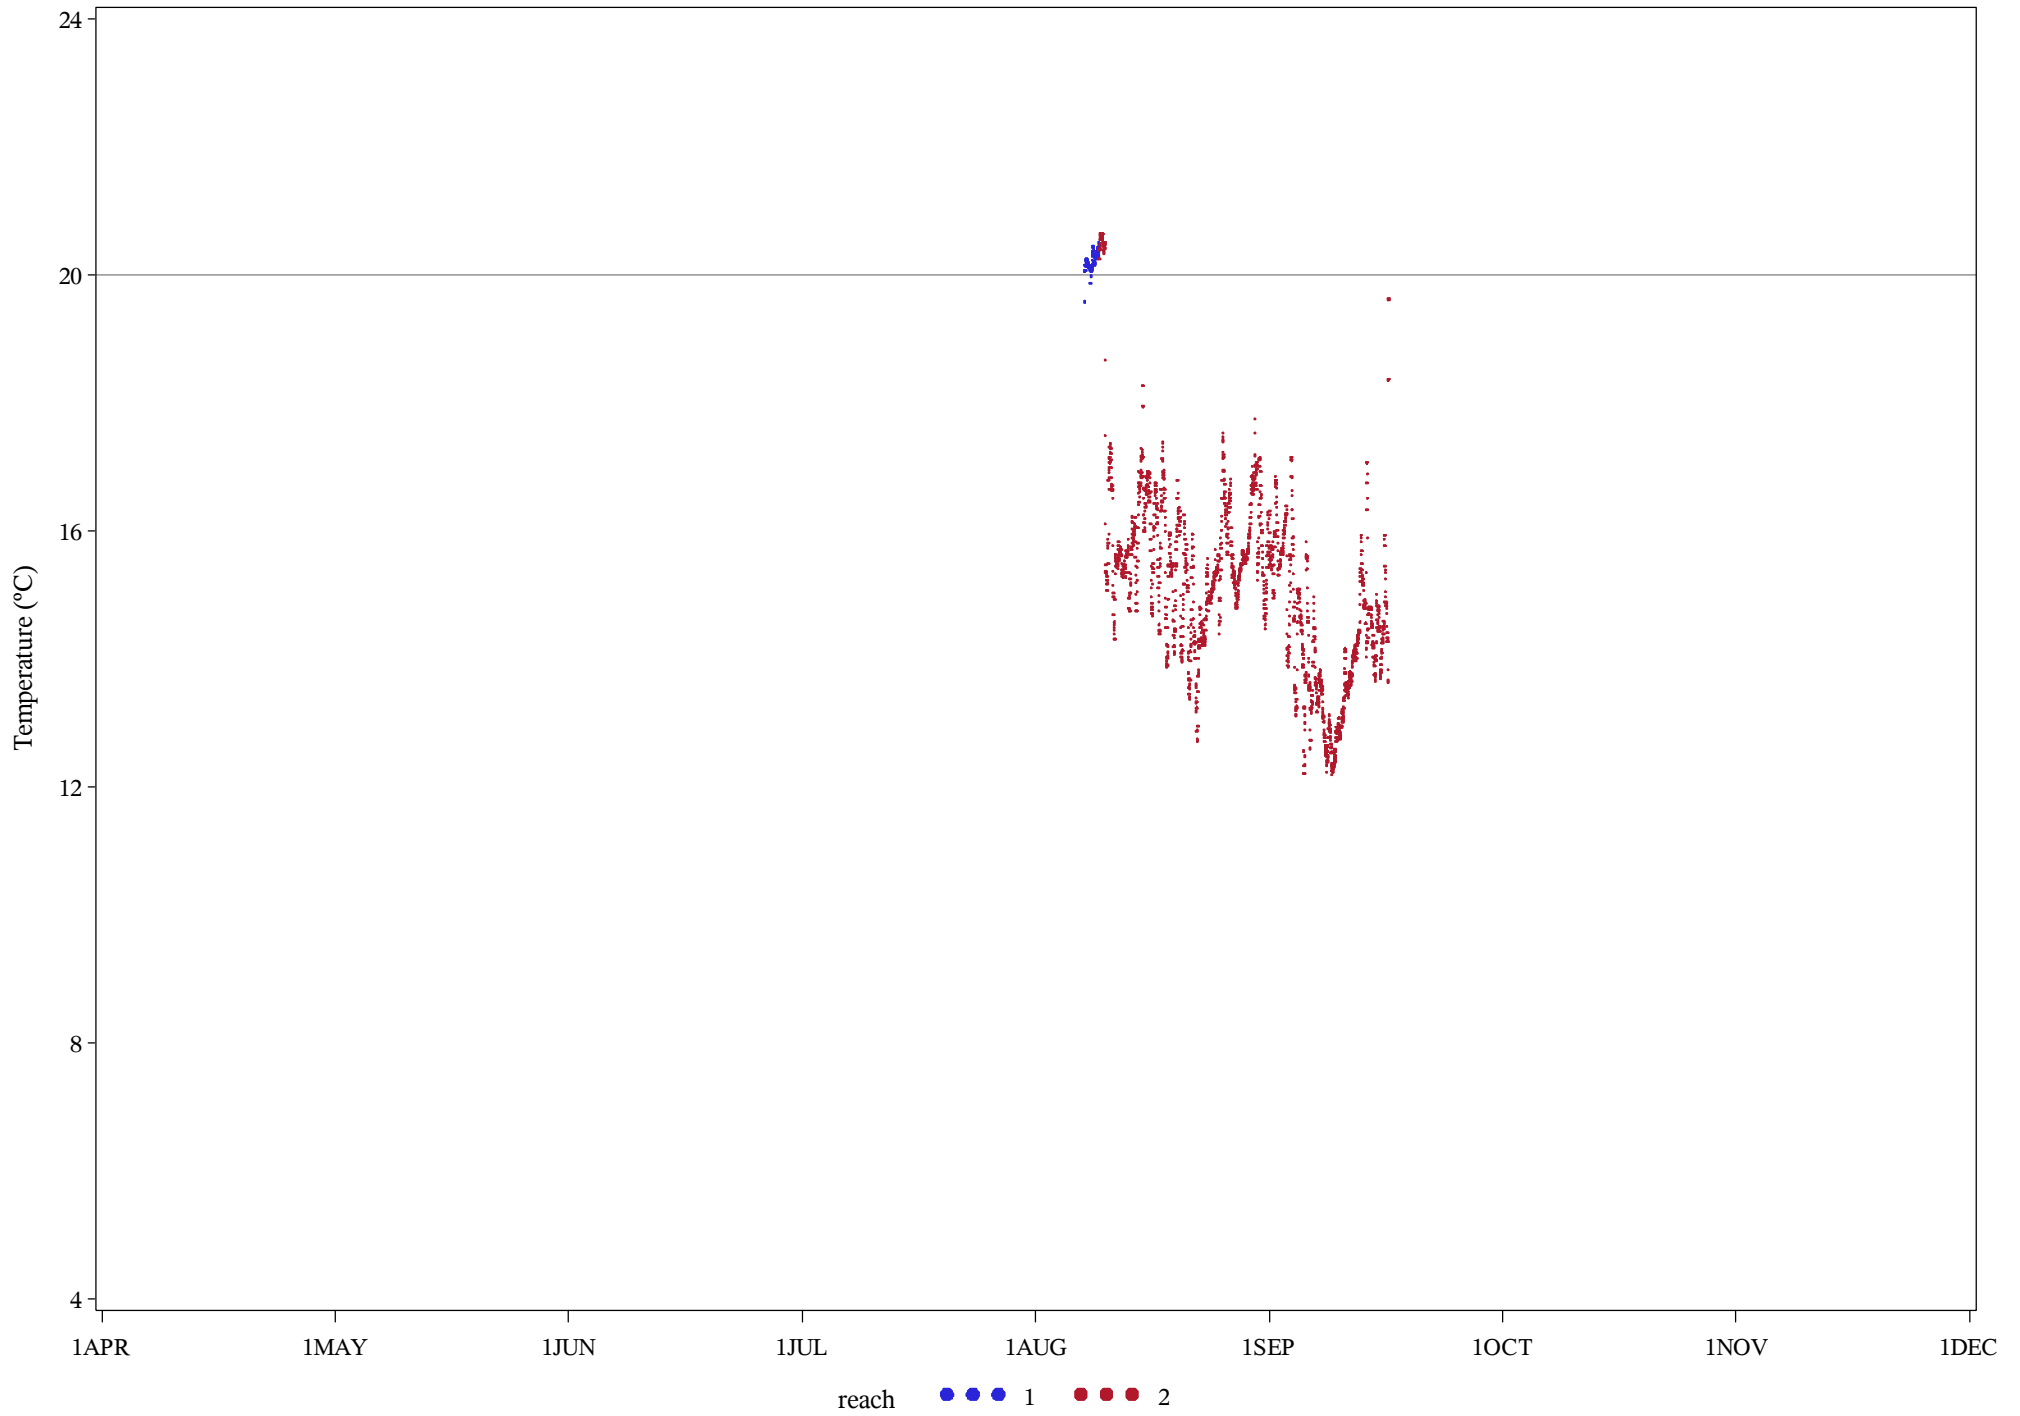

# Steelhead 4969A

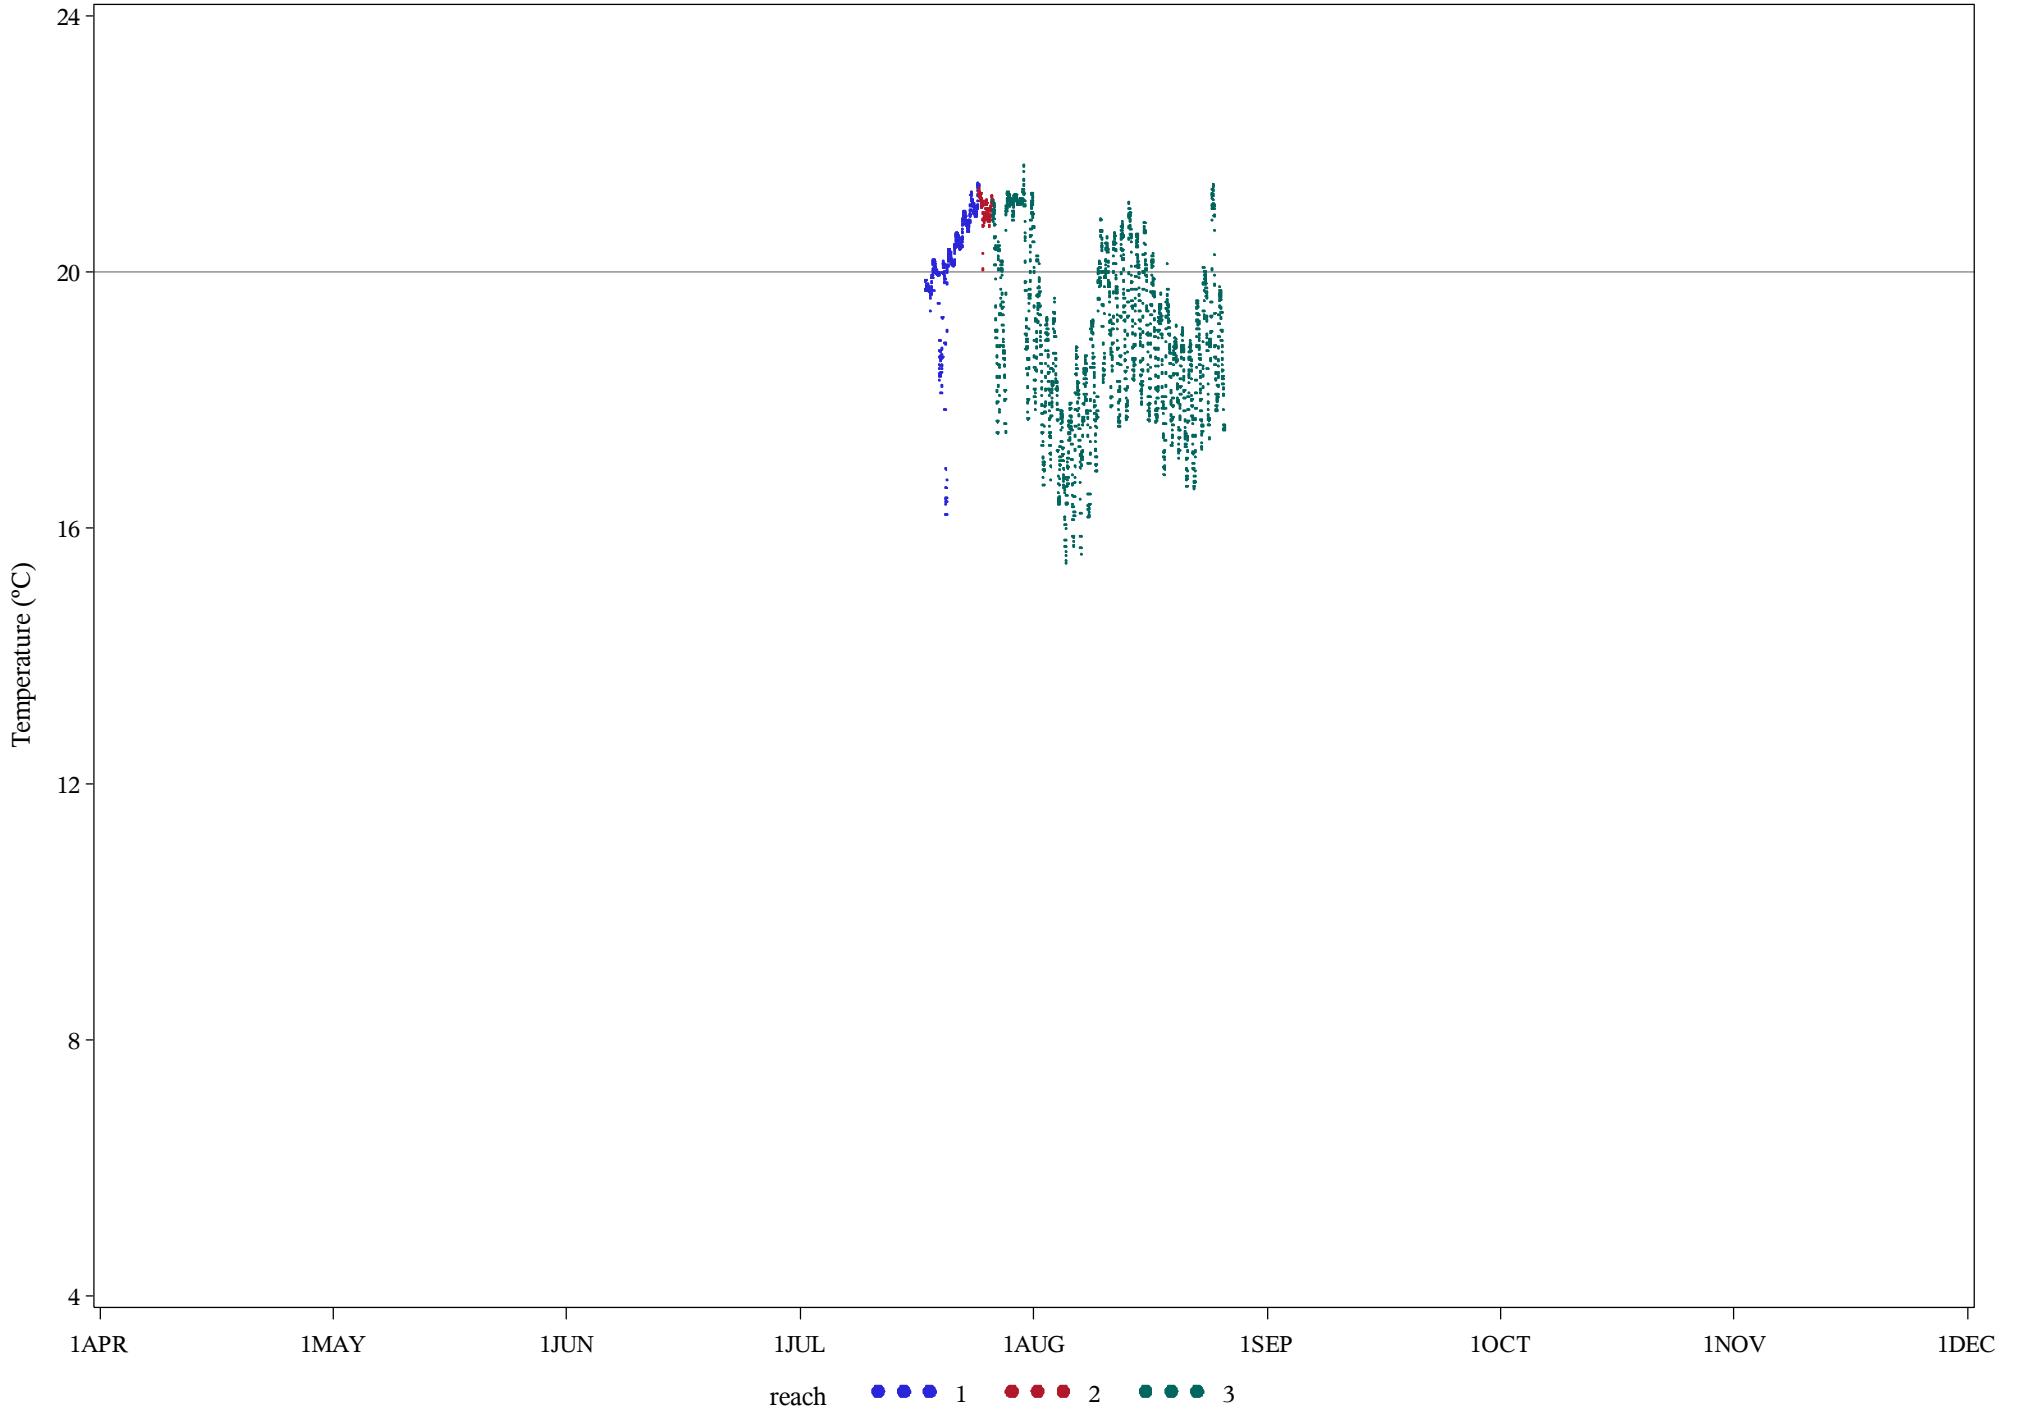

# Steelhead 4972A

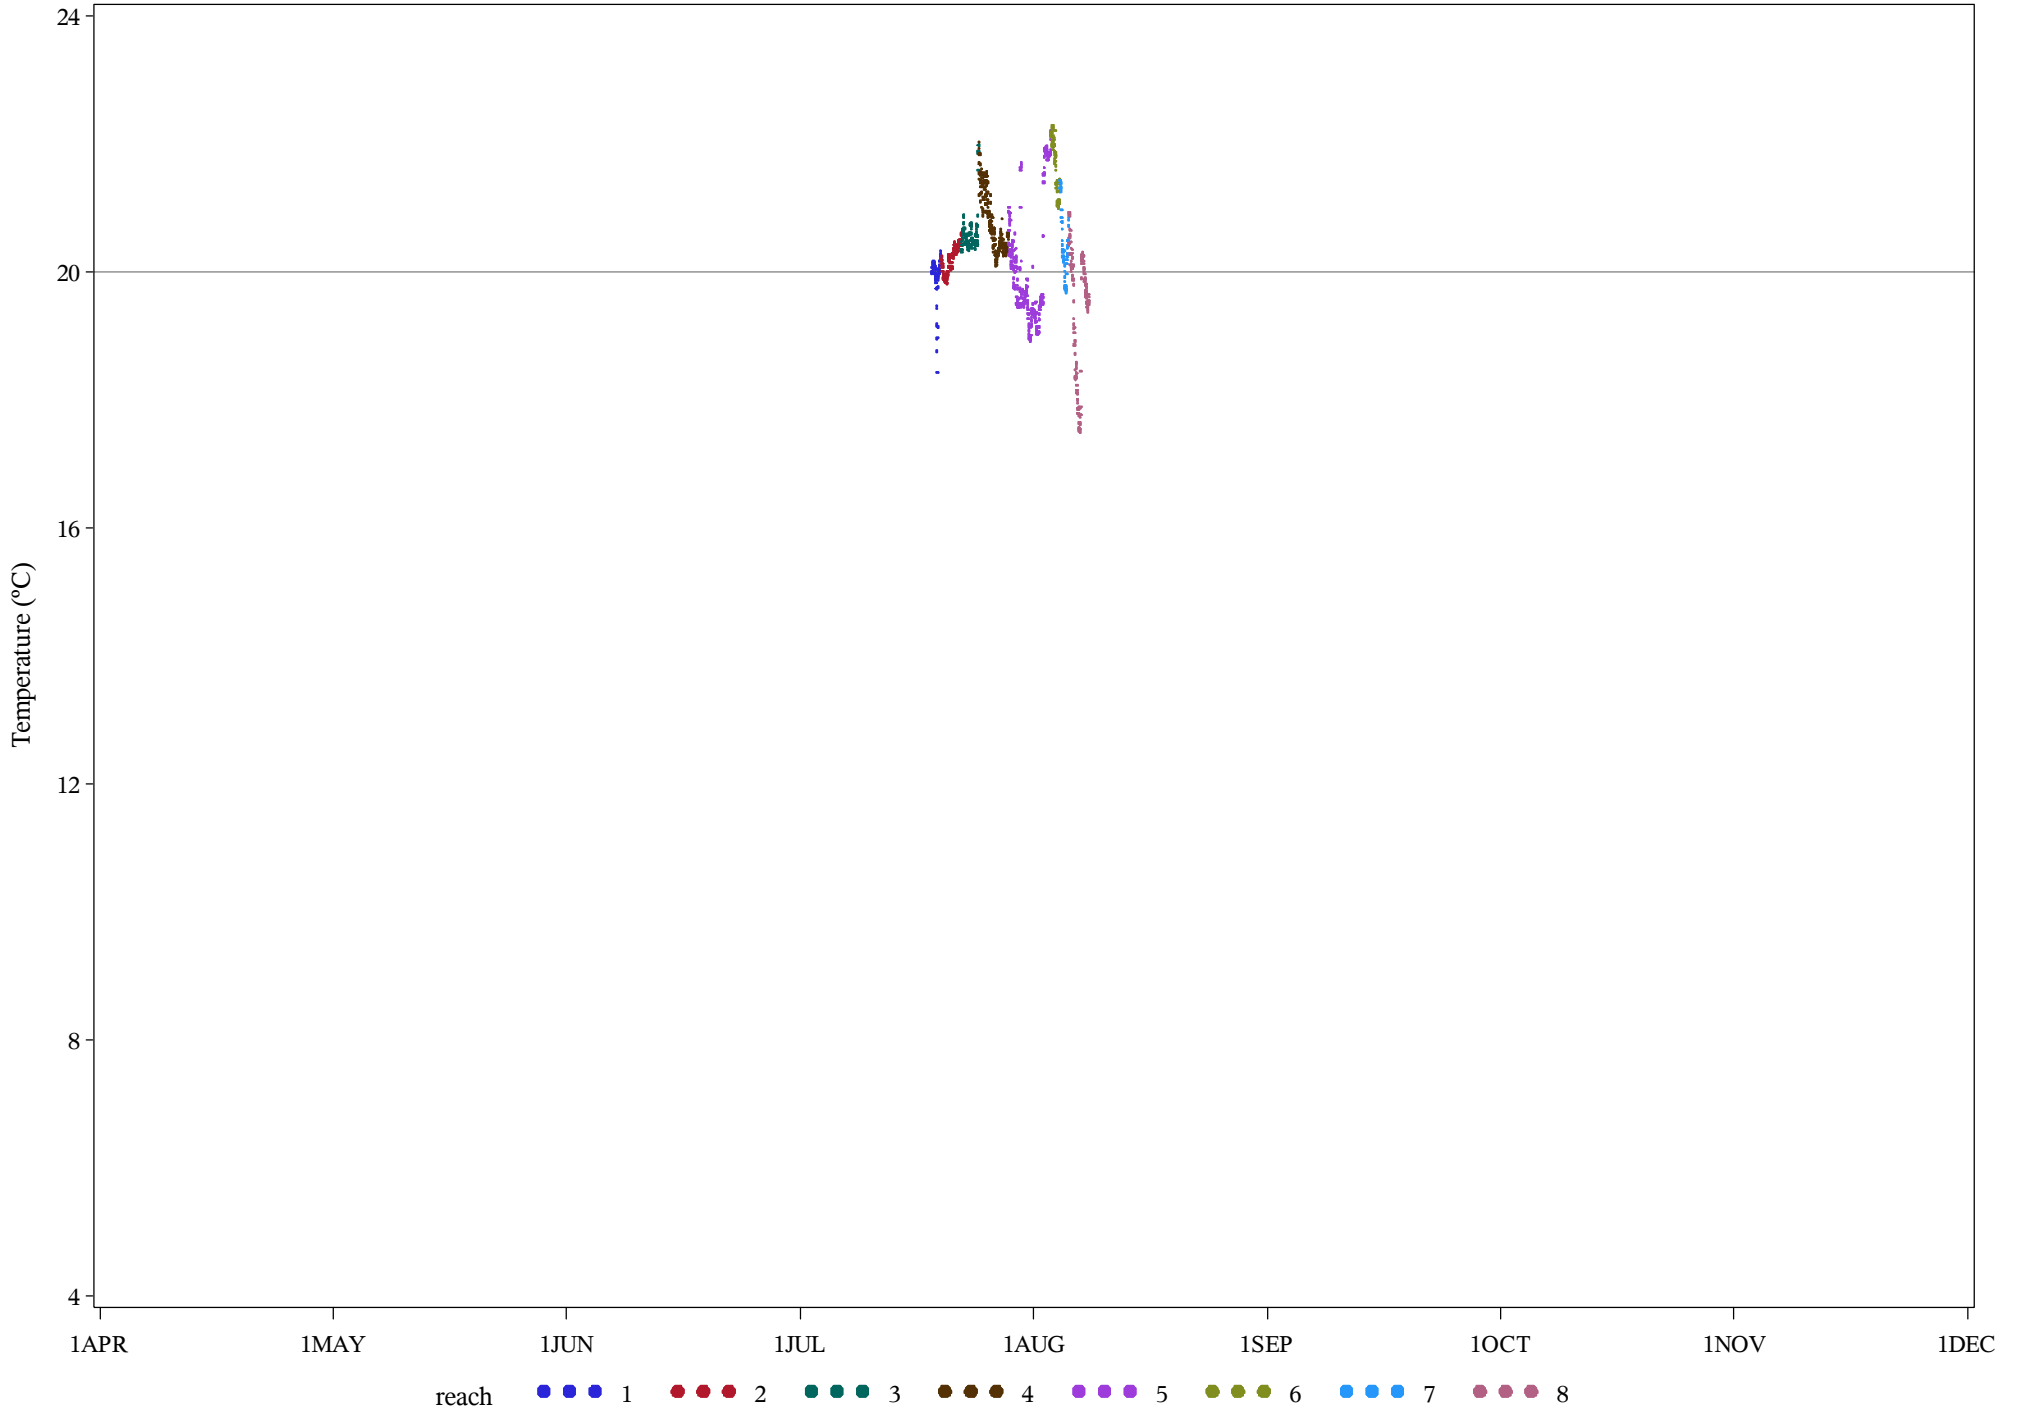

# Summer Chinook 4728A

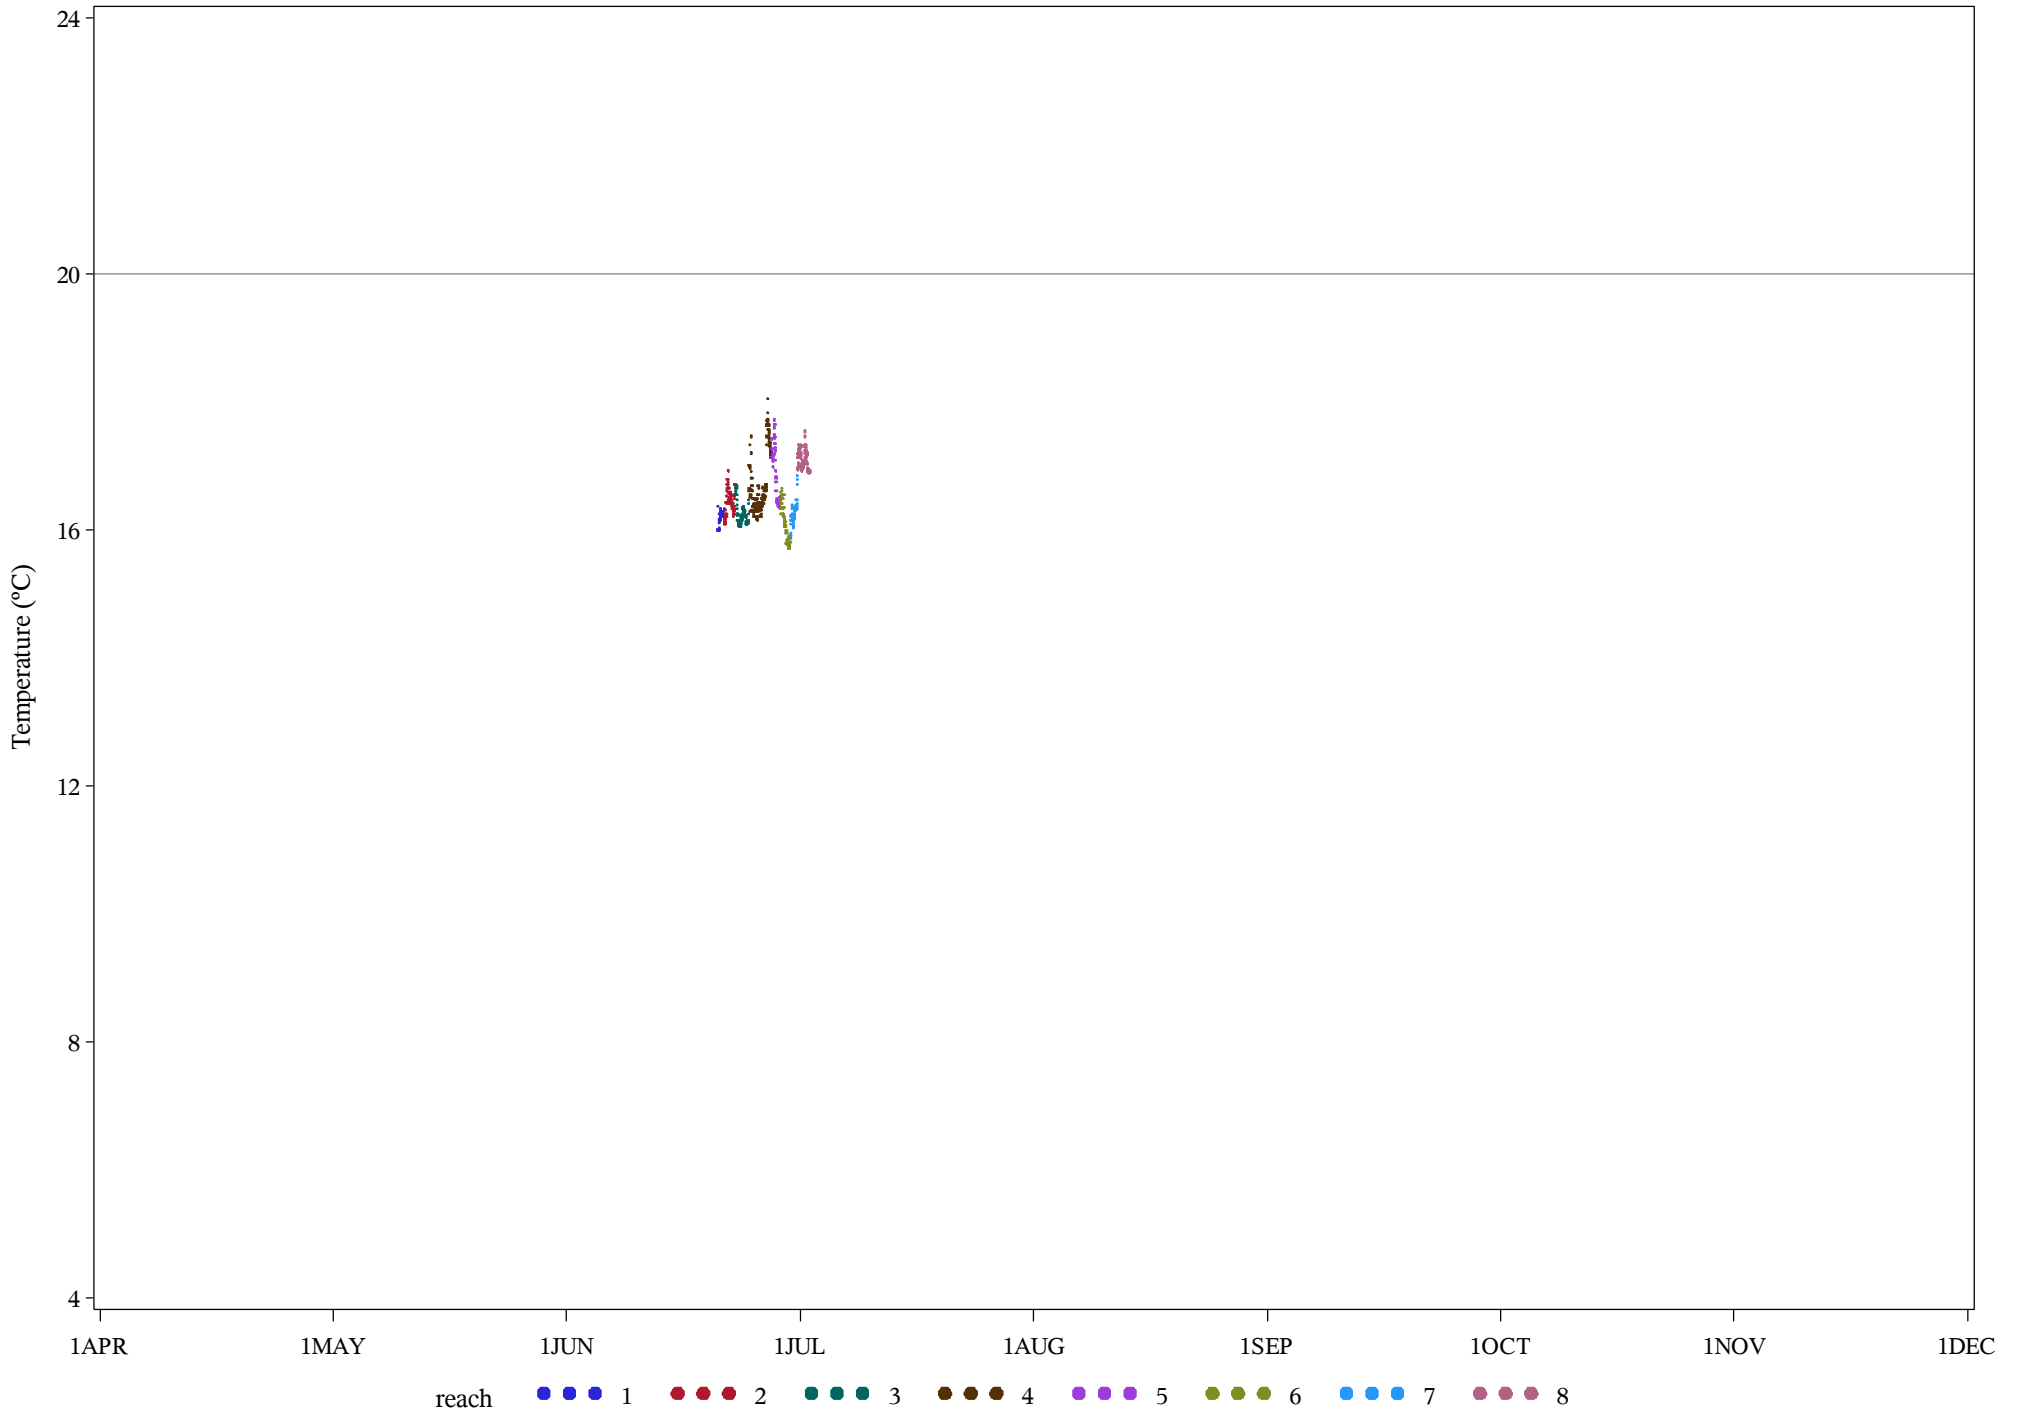









# Summer Chinook 4749A

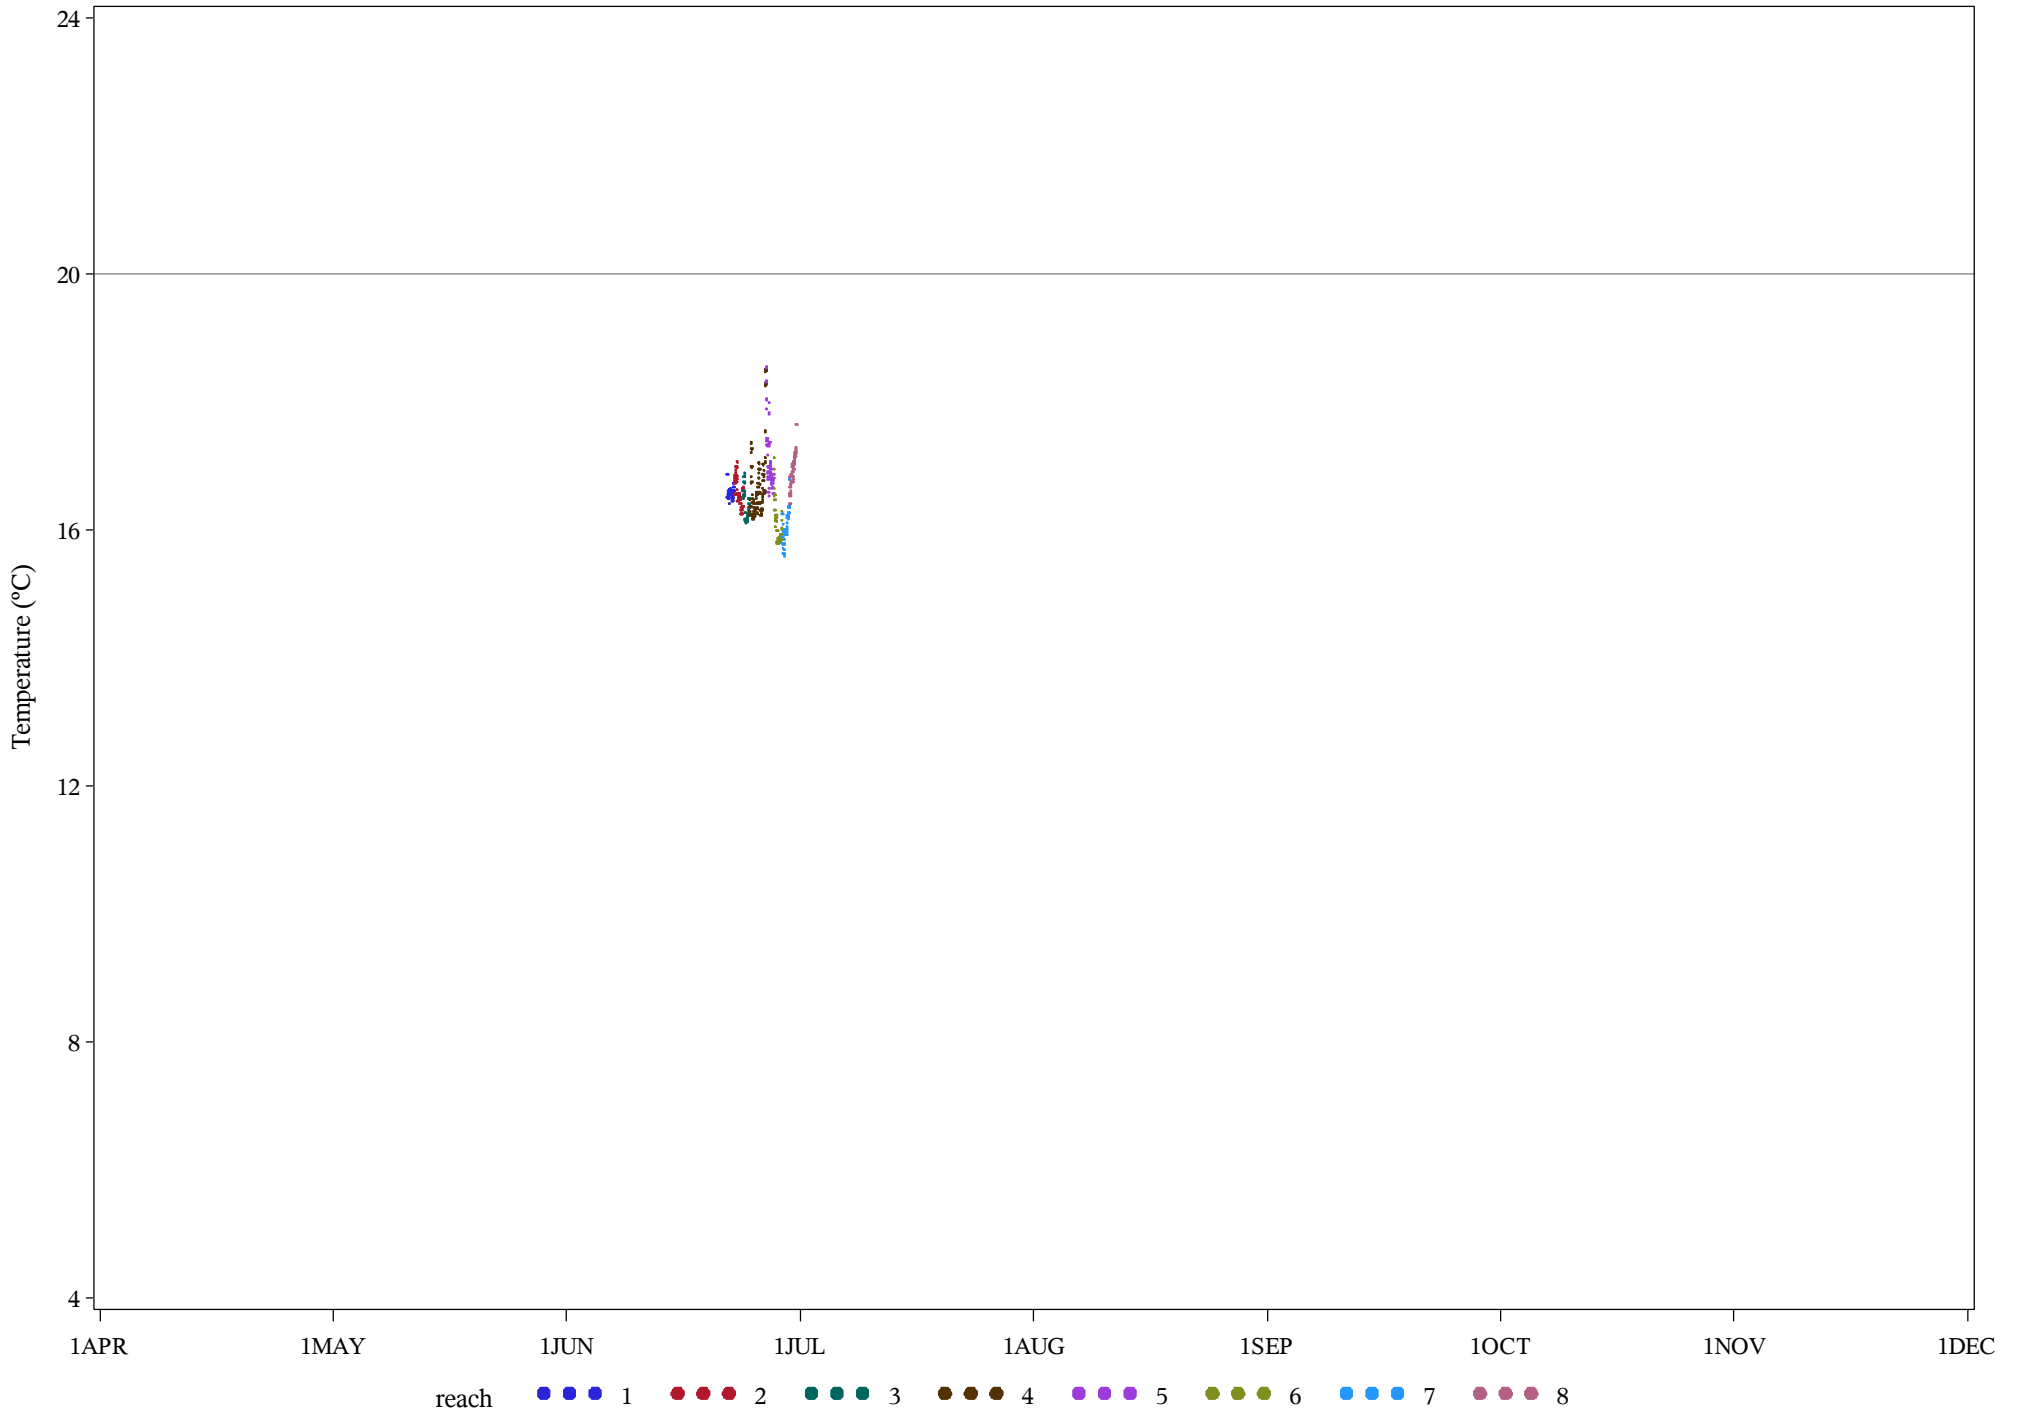

# Summer Chinook 4750A

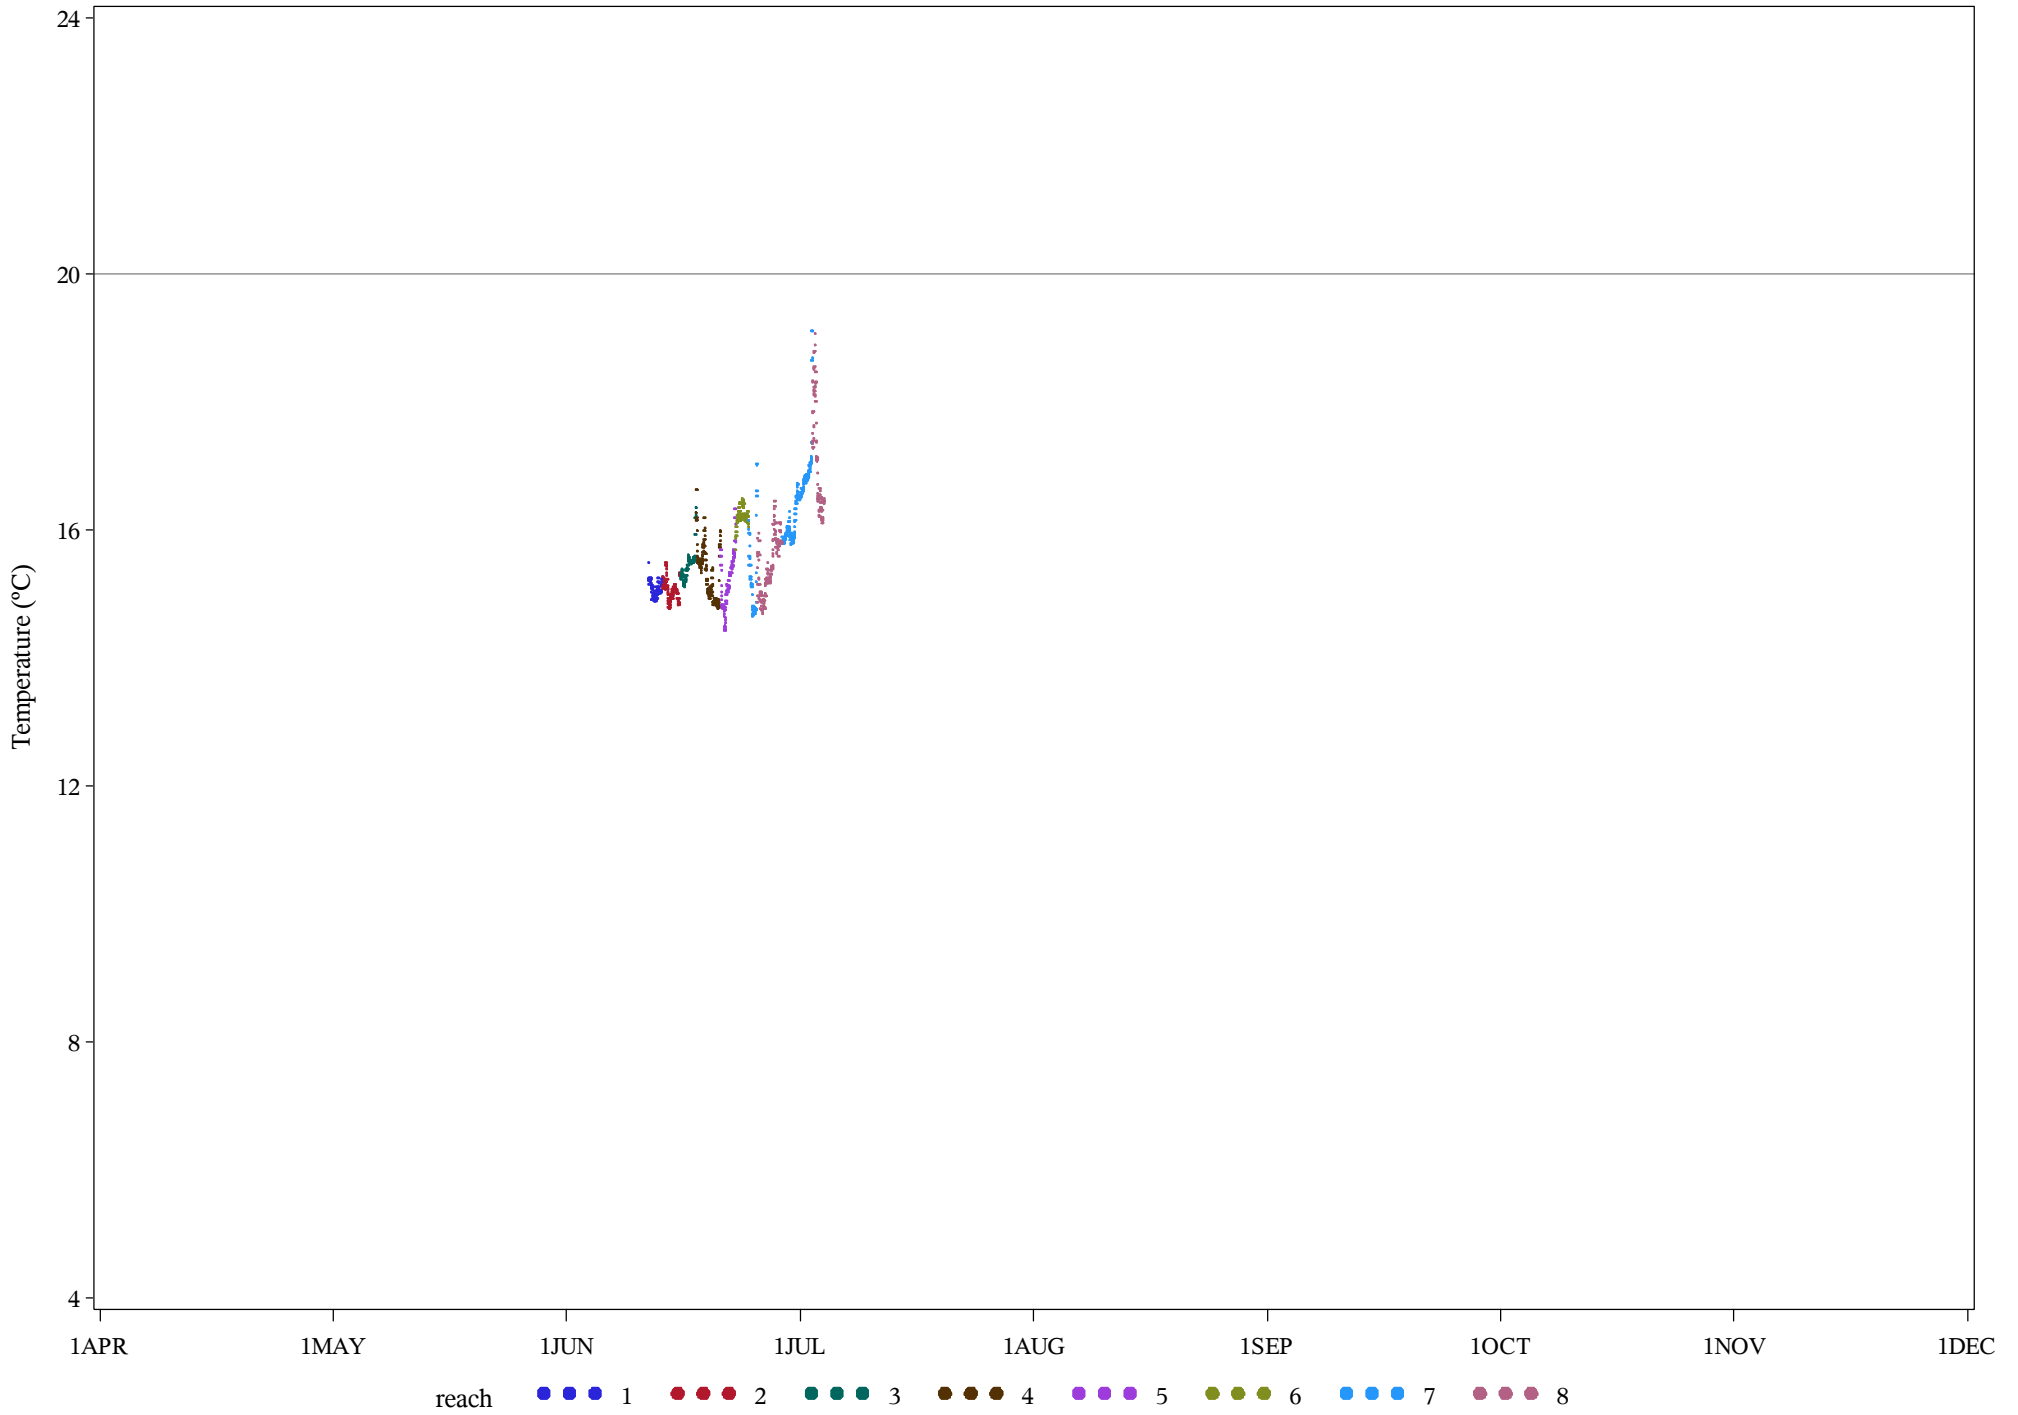

# Summer Chinook 4752A

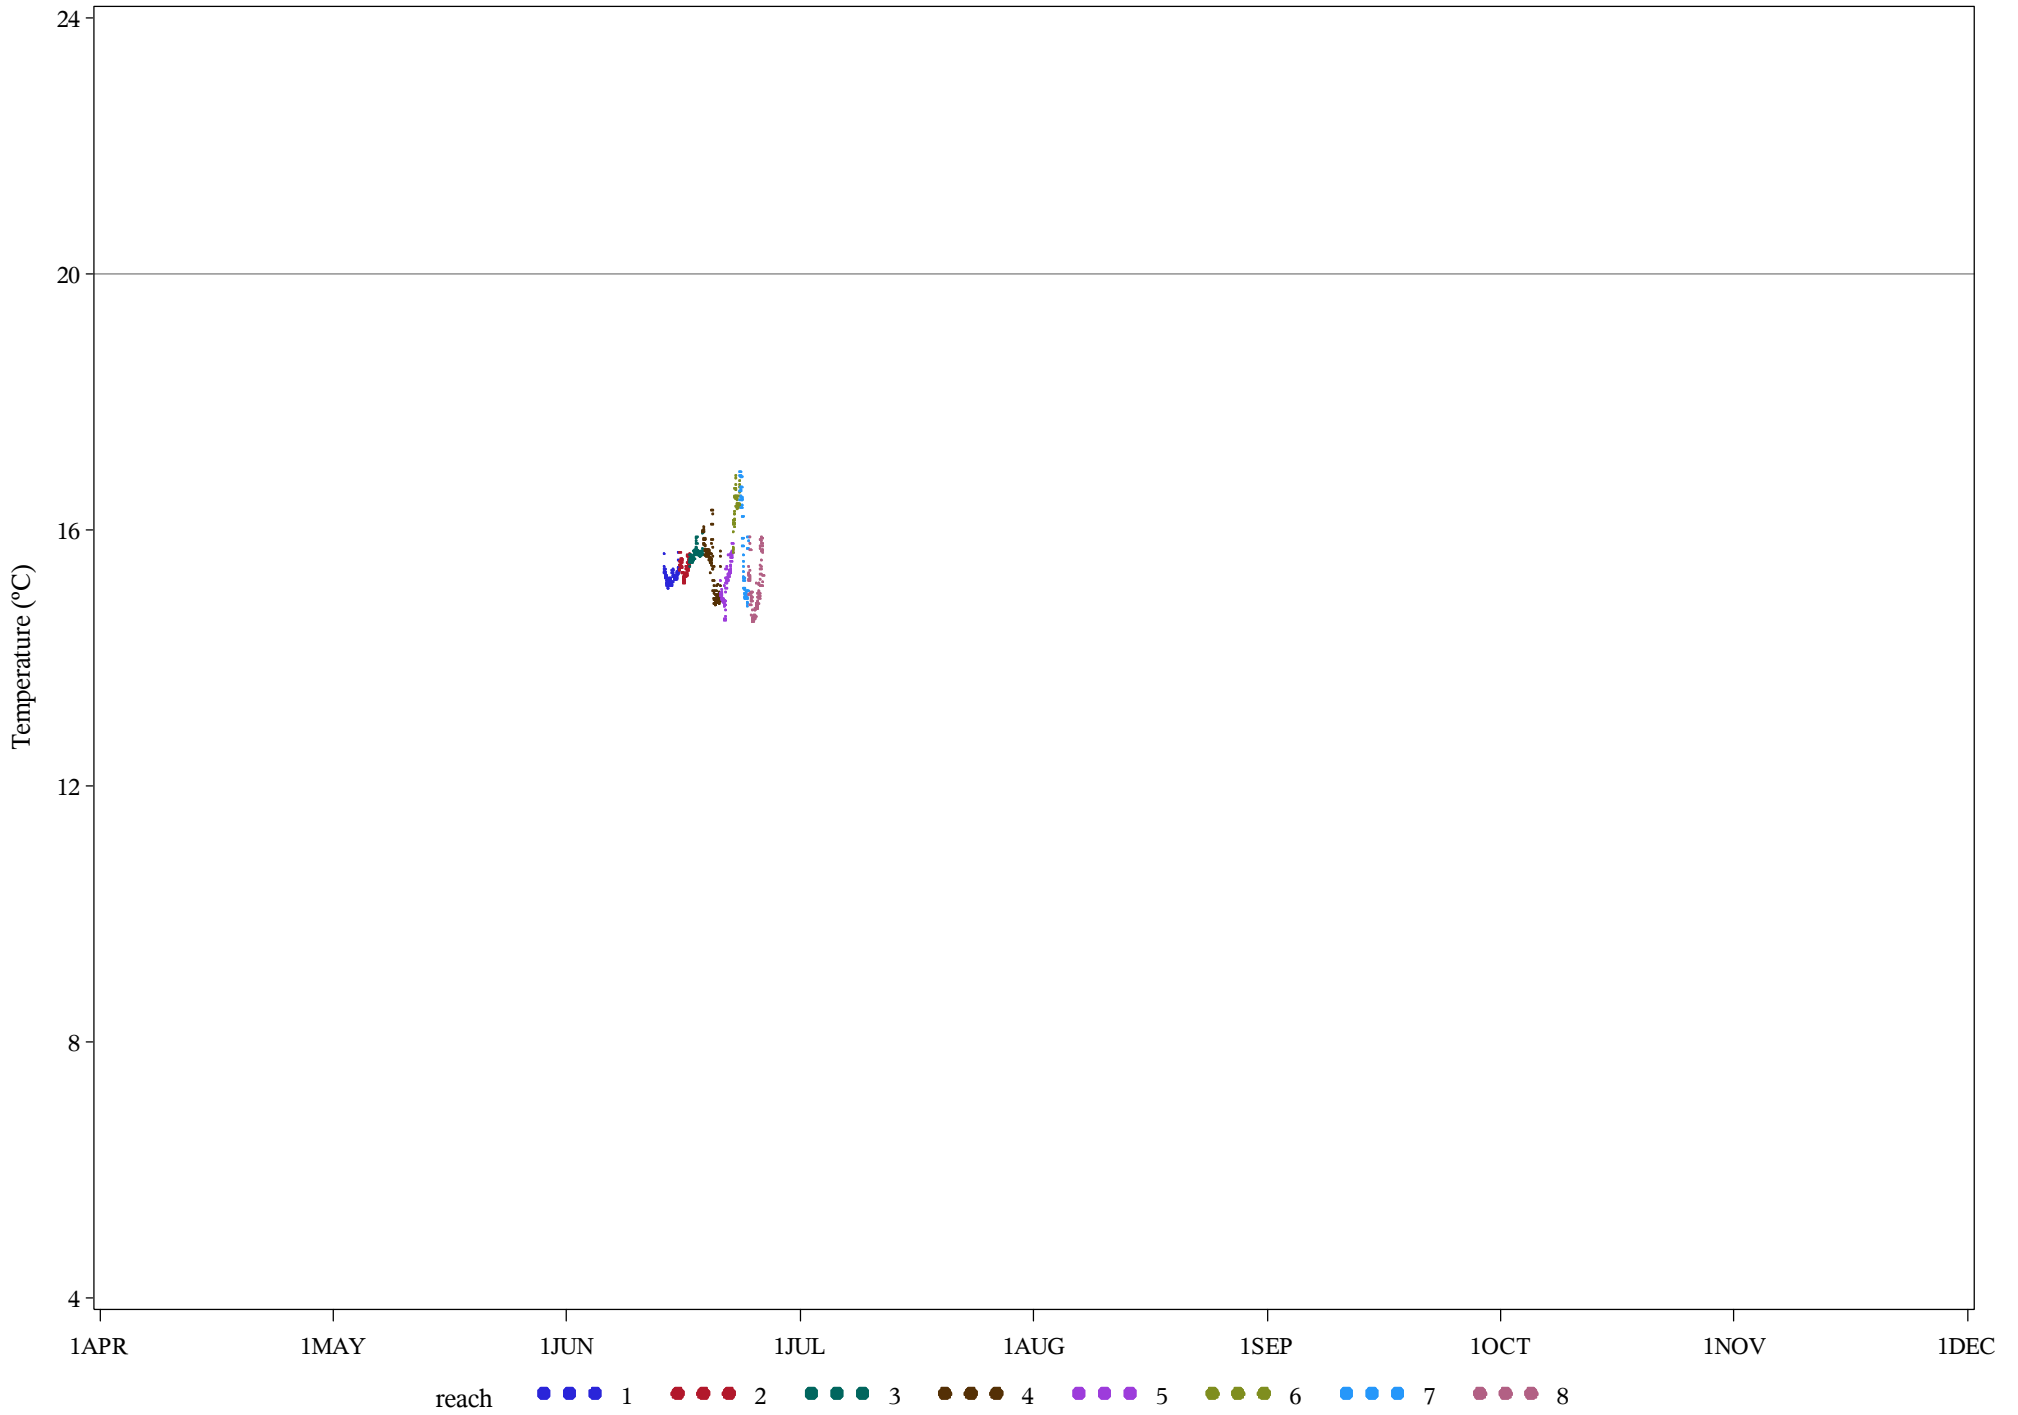

# Summer Chinook 4757A

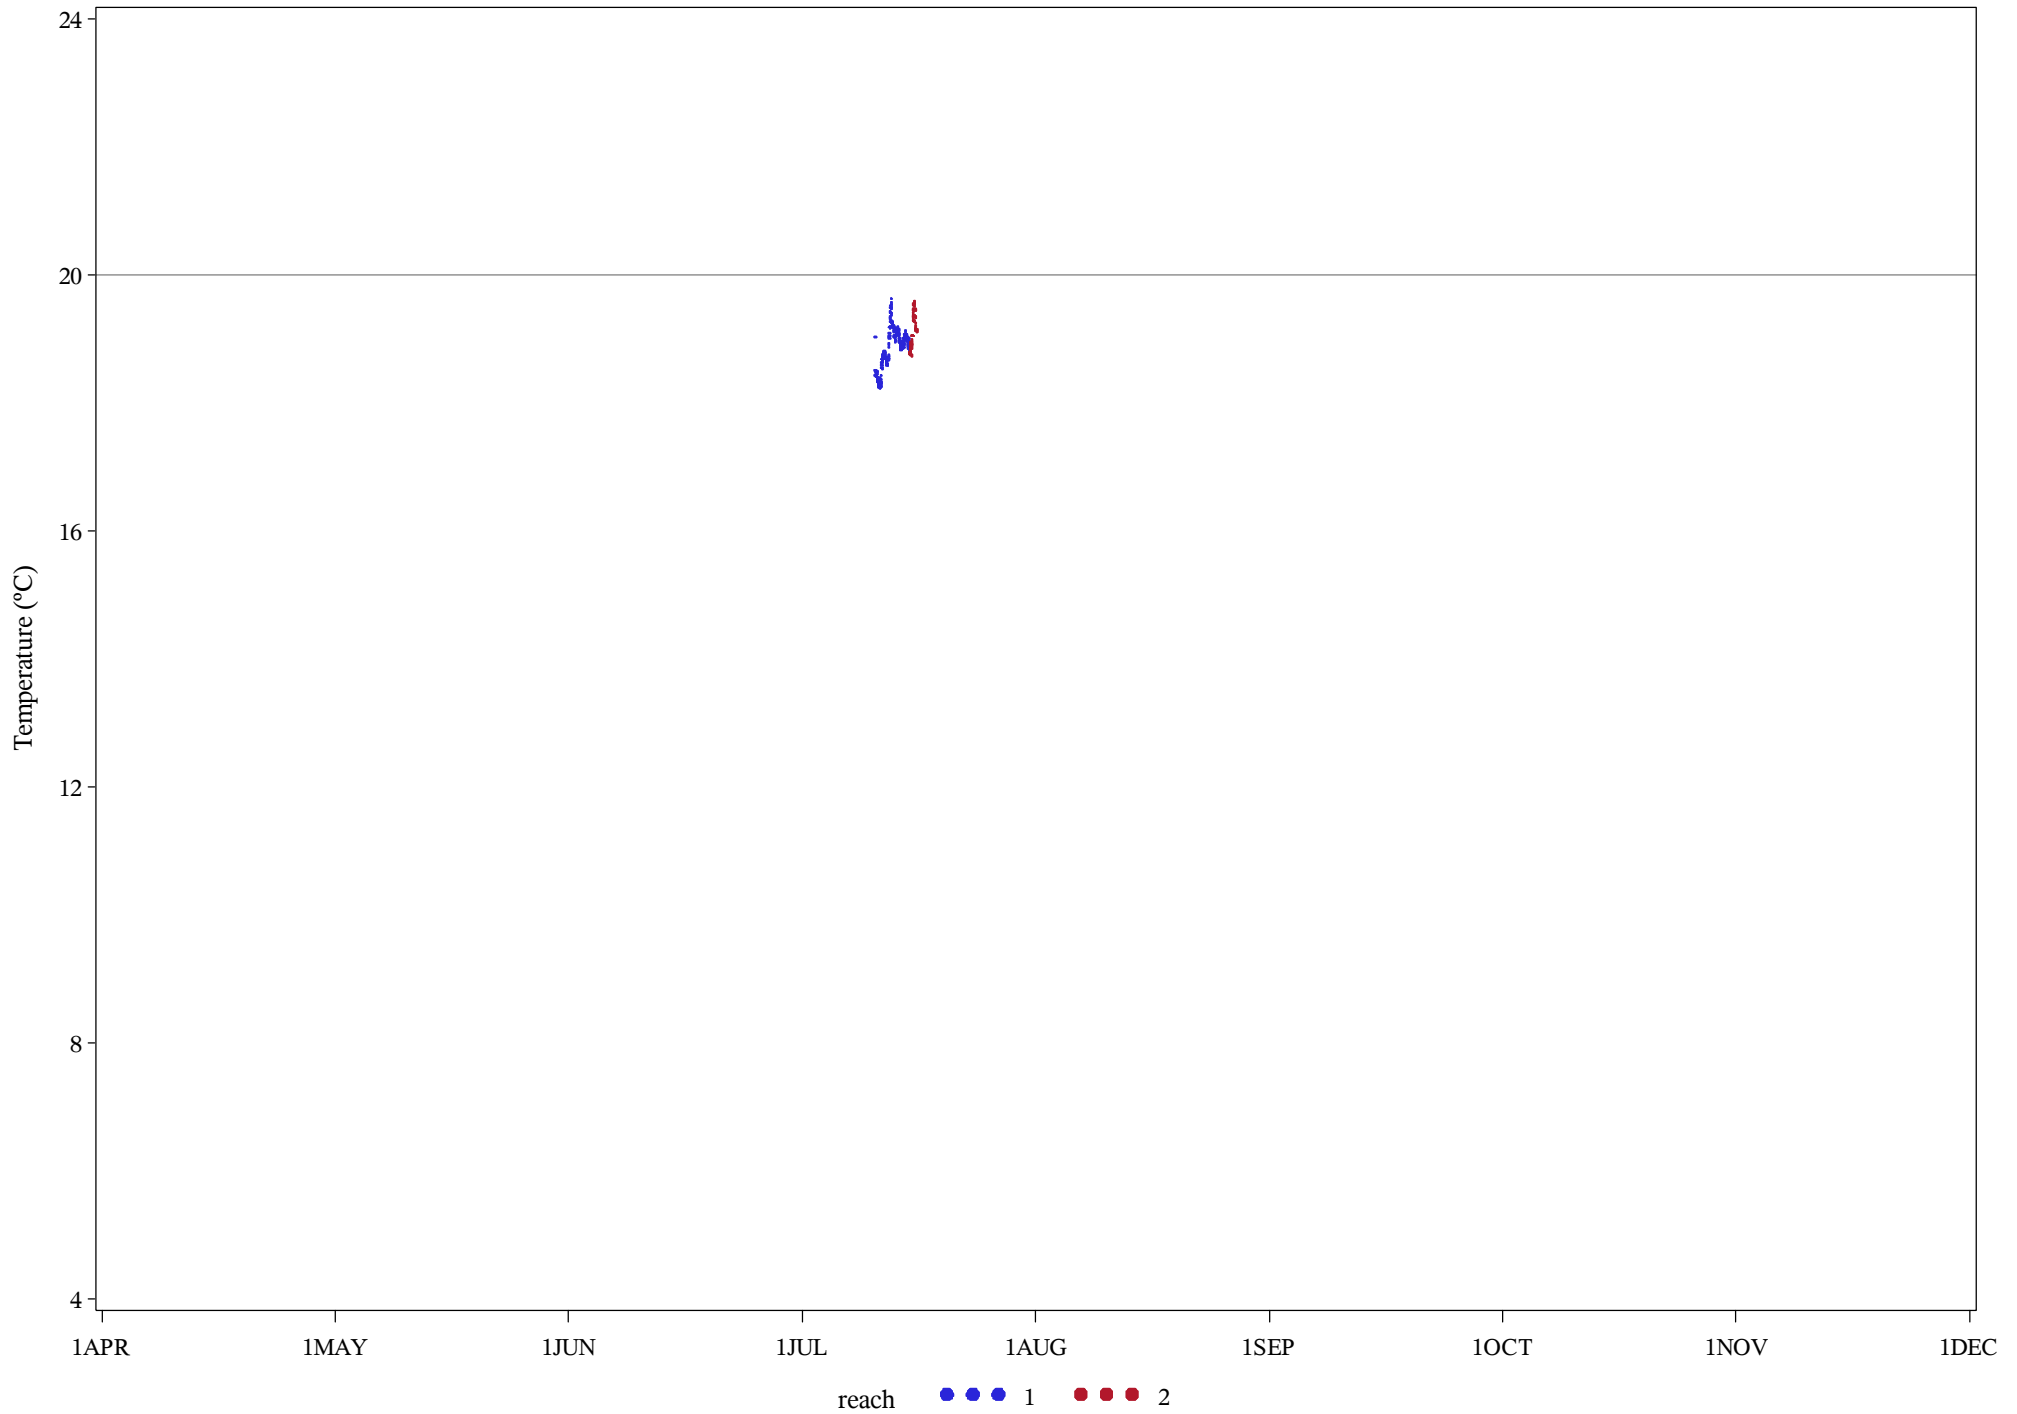

# Summer Chinook 4758A

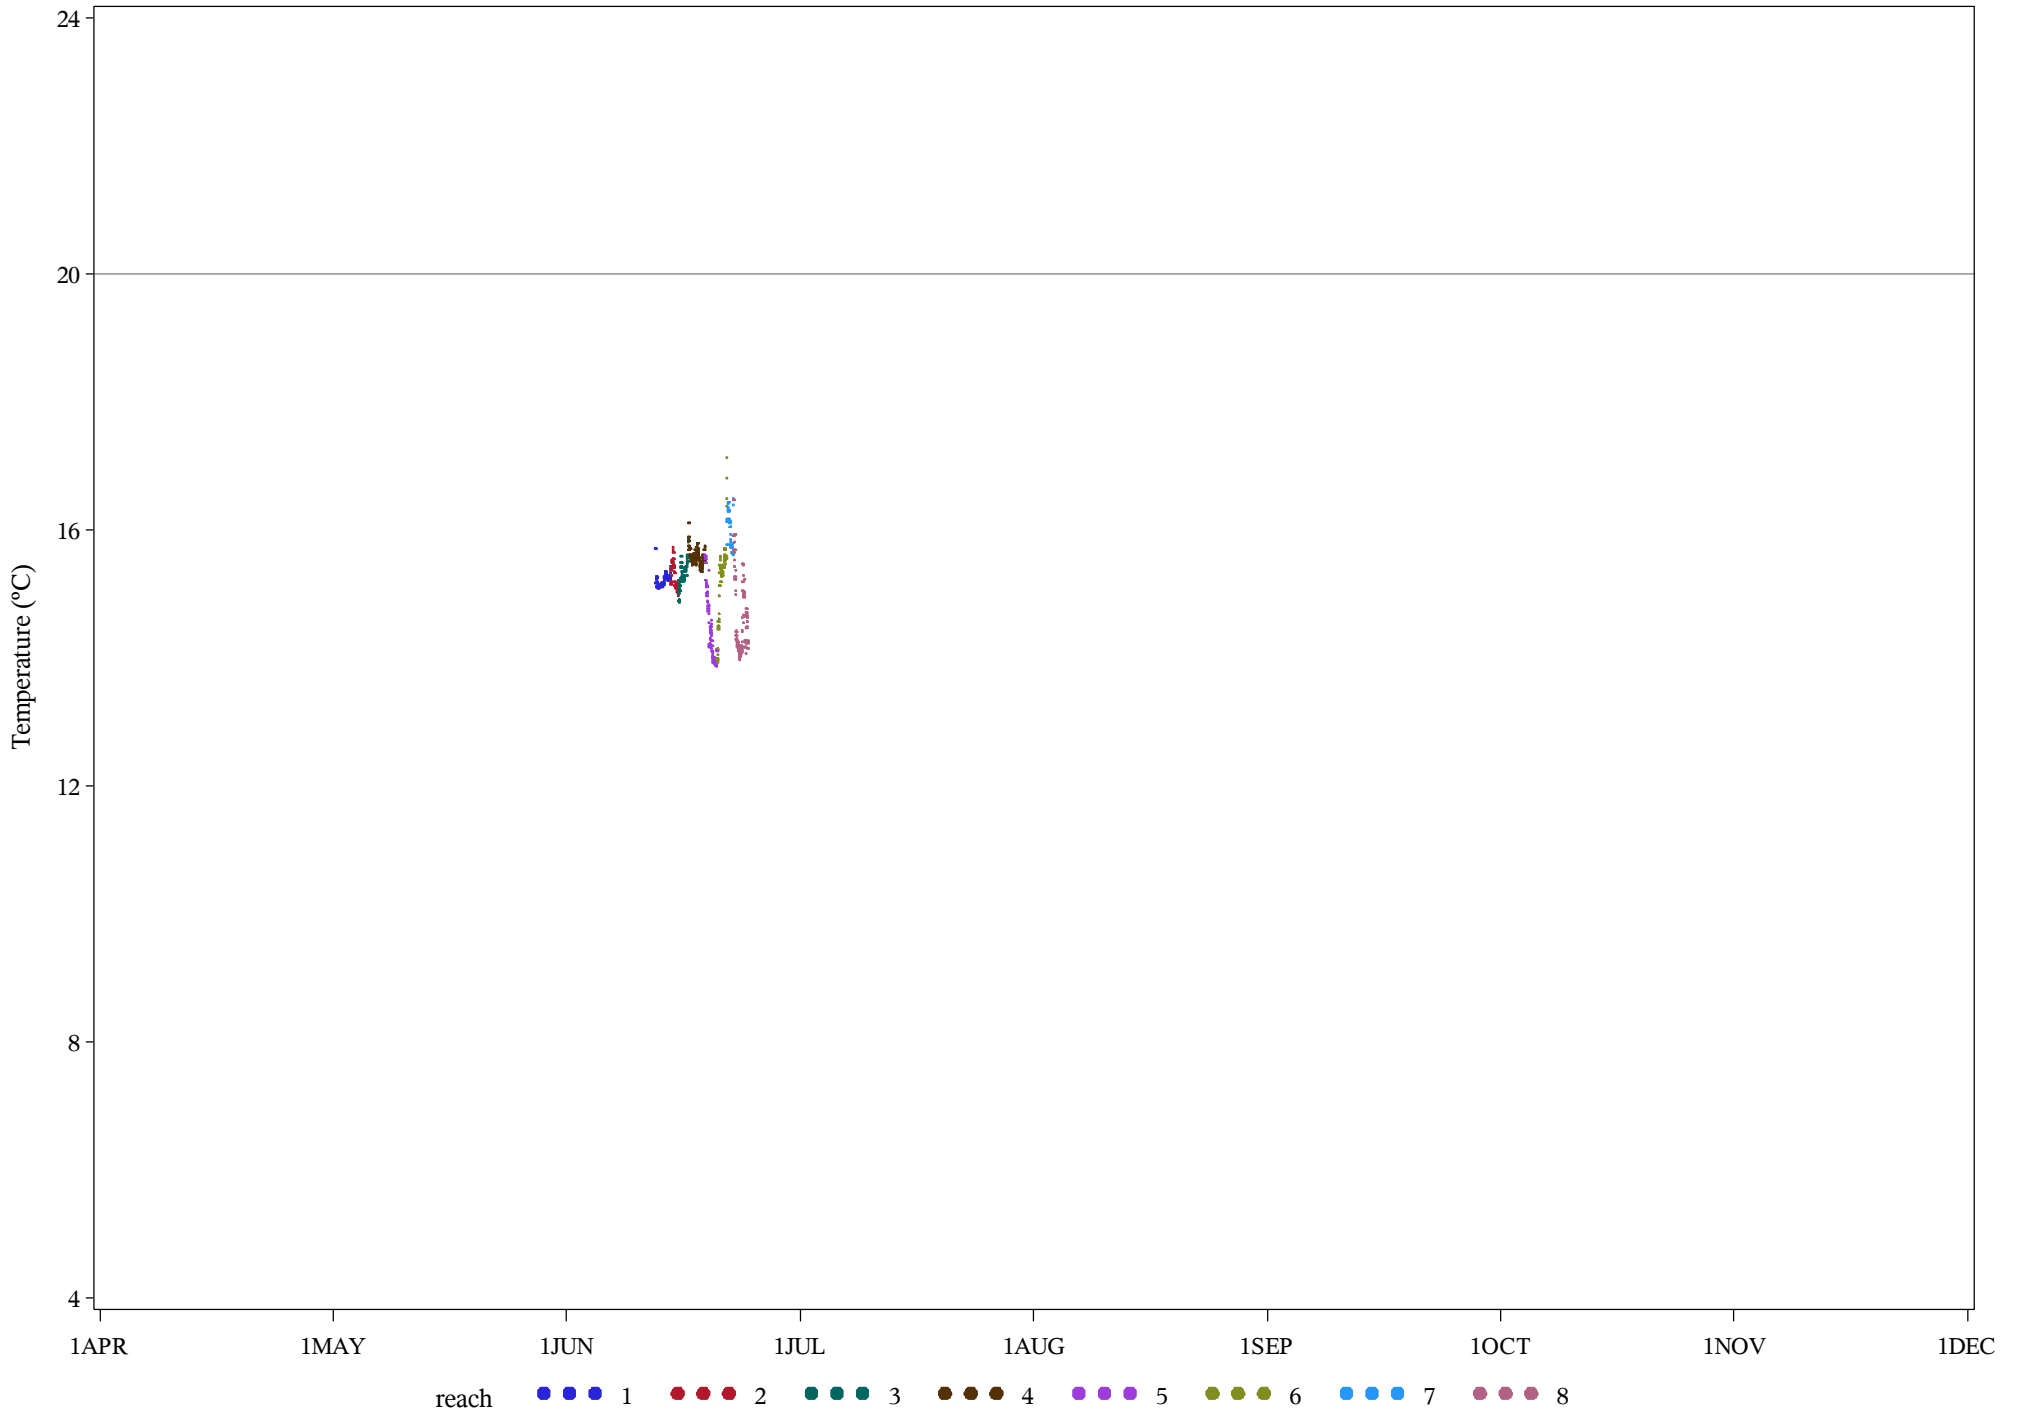



# Summer Chinook 4759A

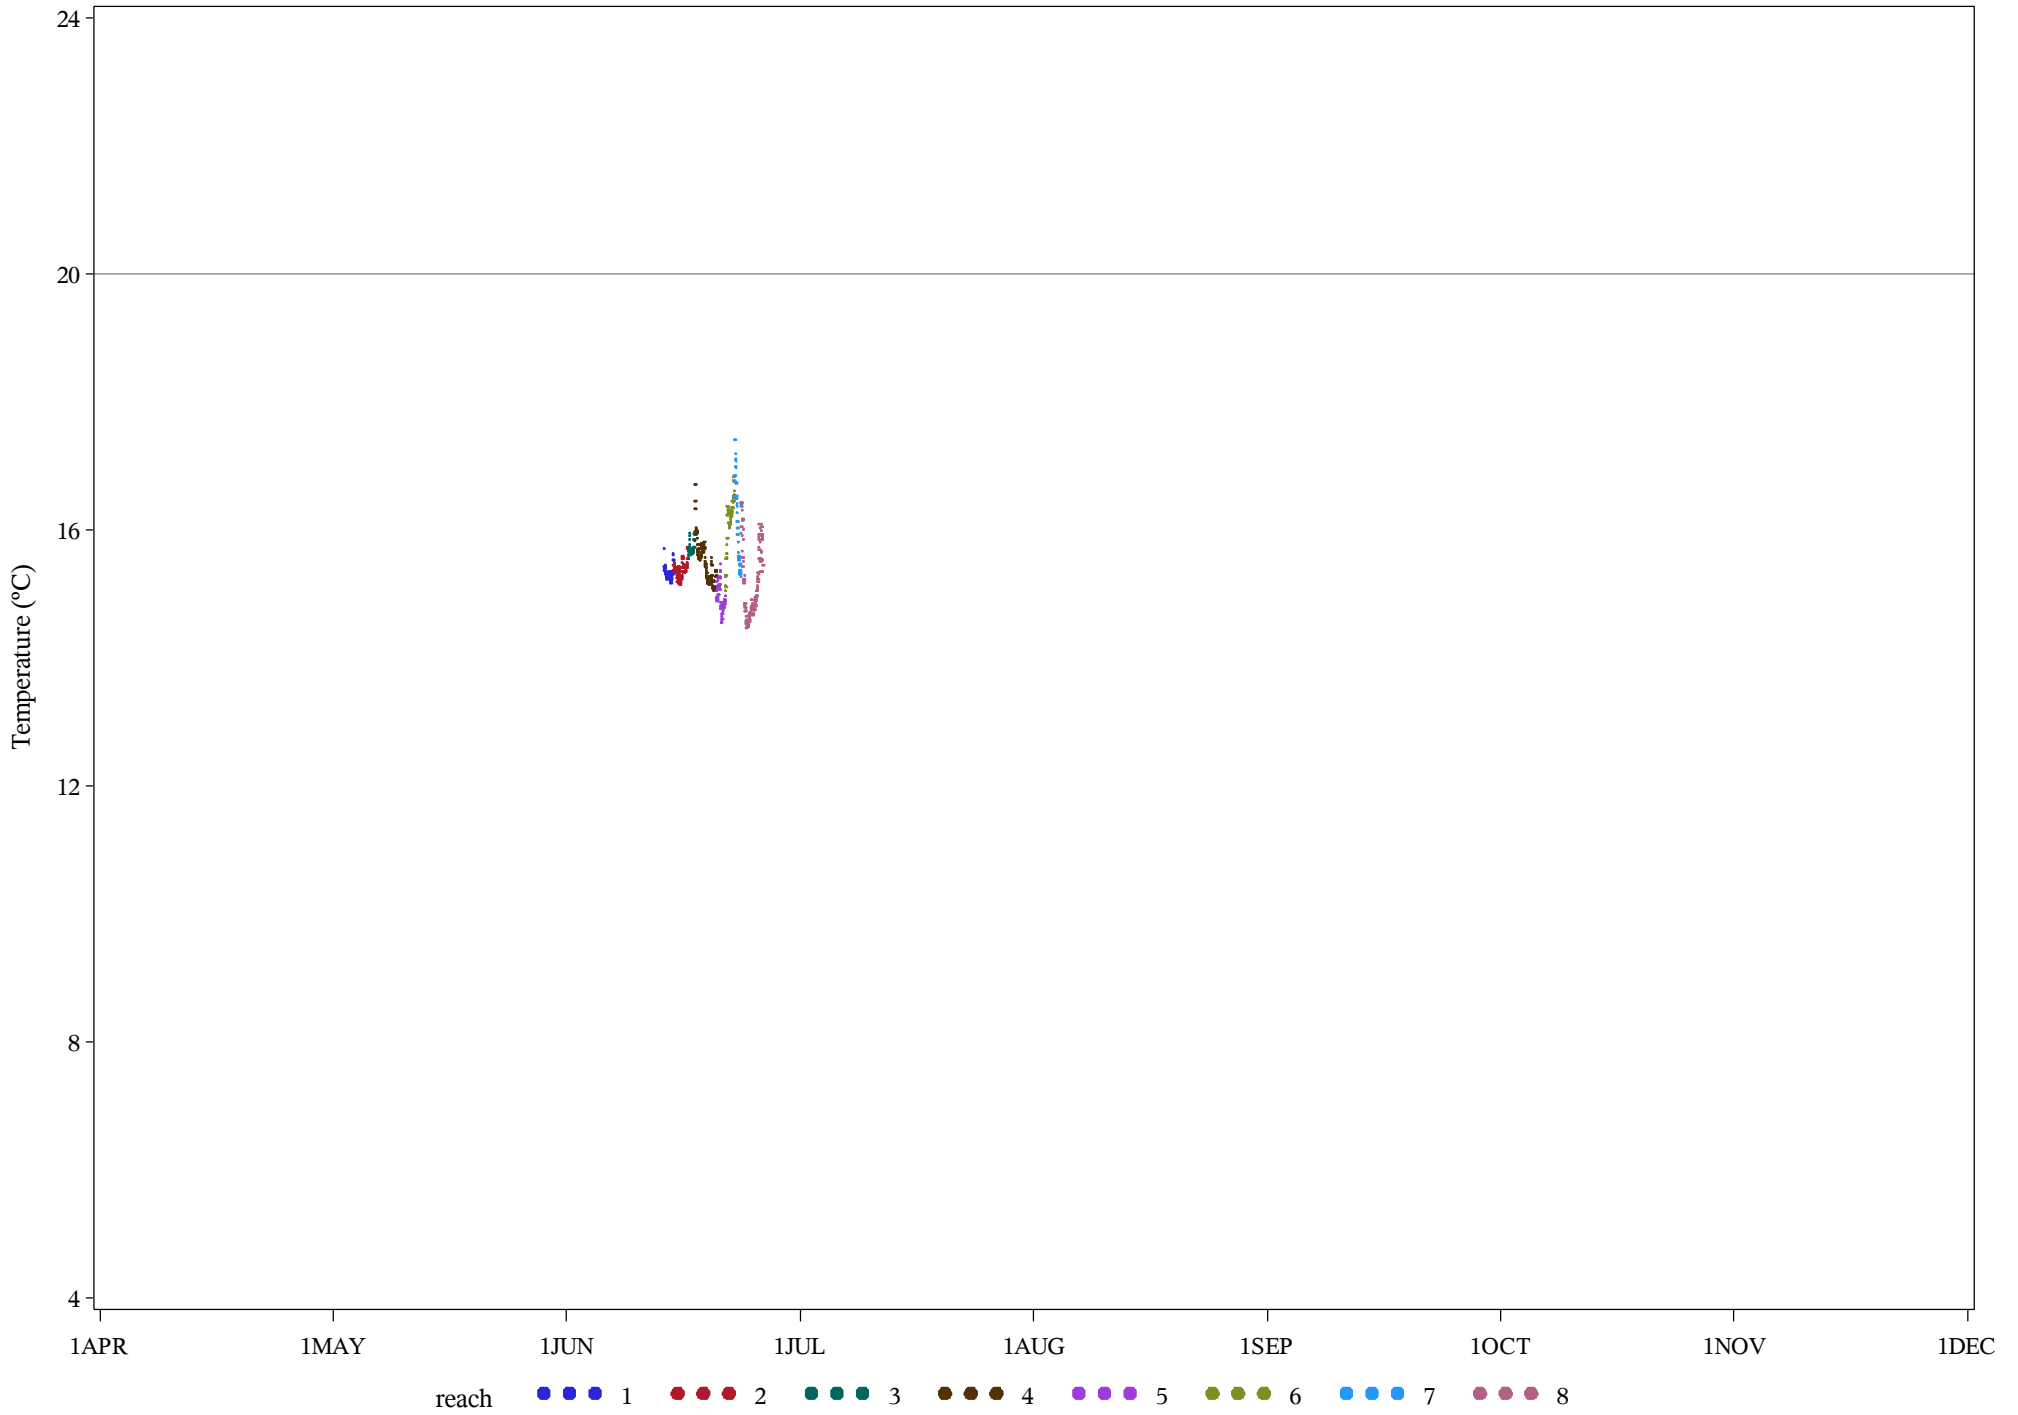



# Summer Chinook 4762A

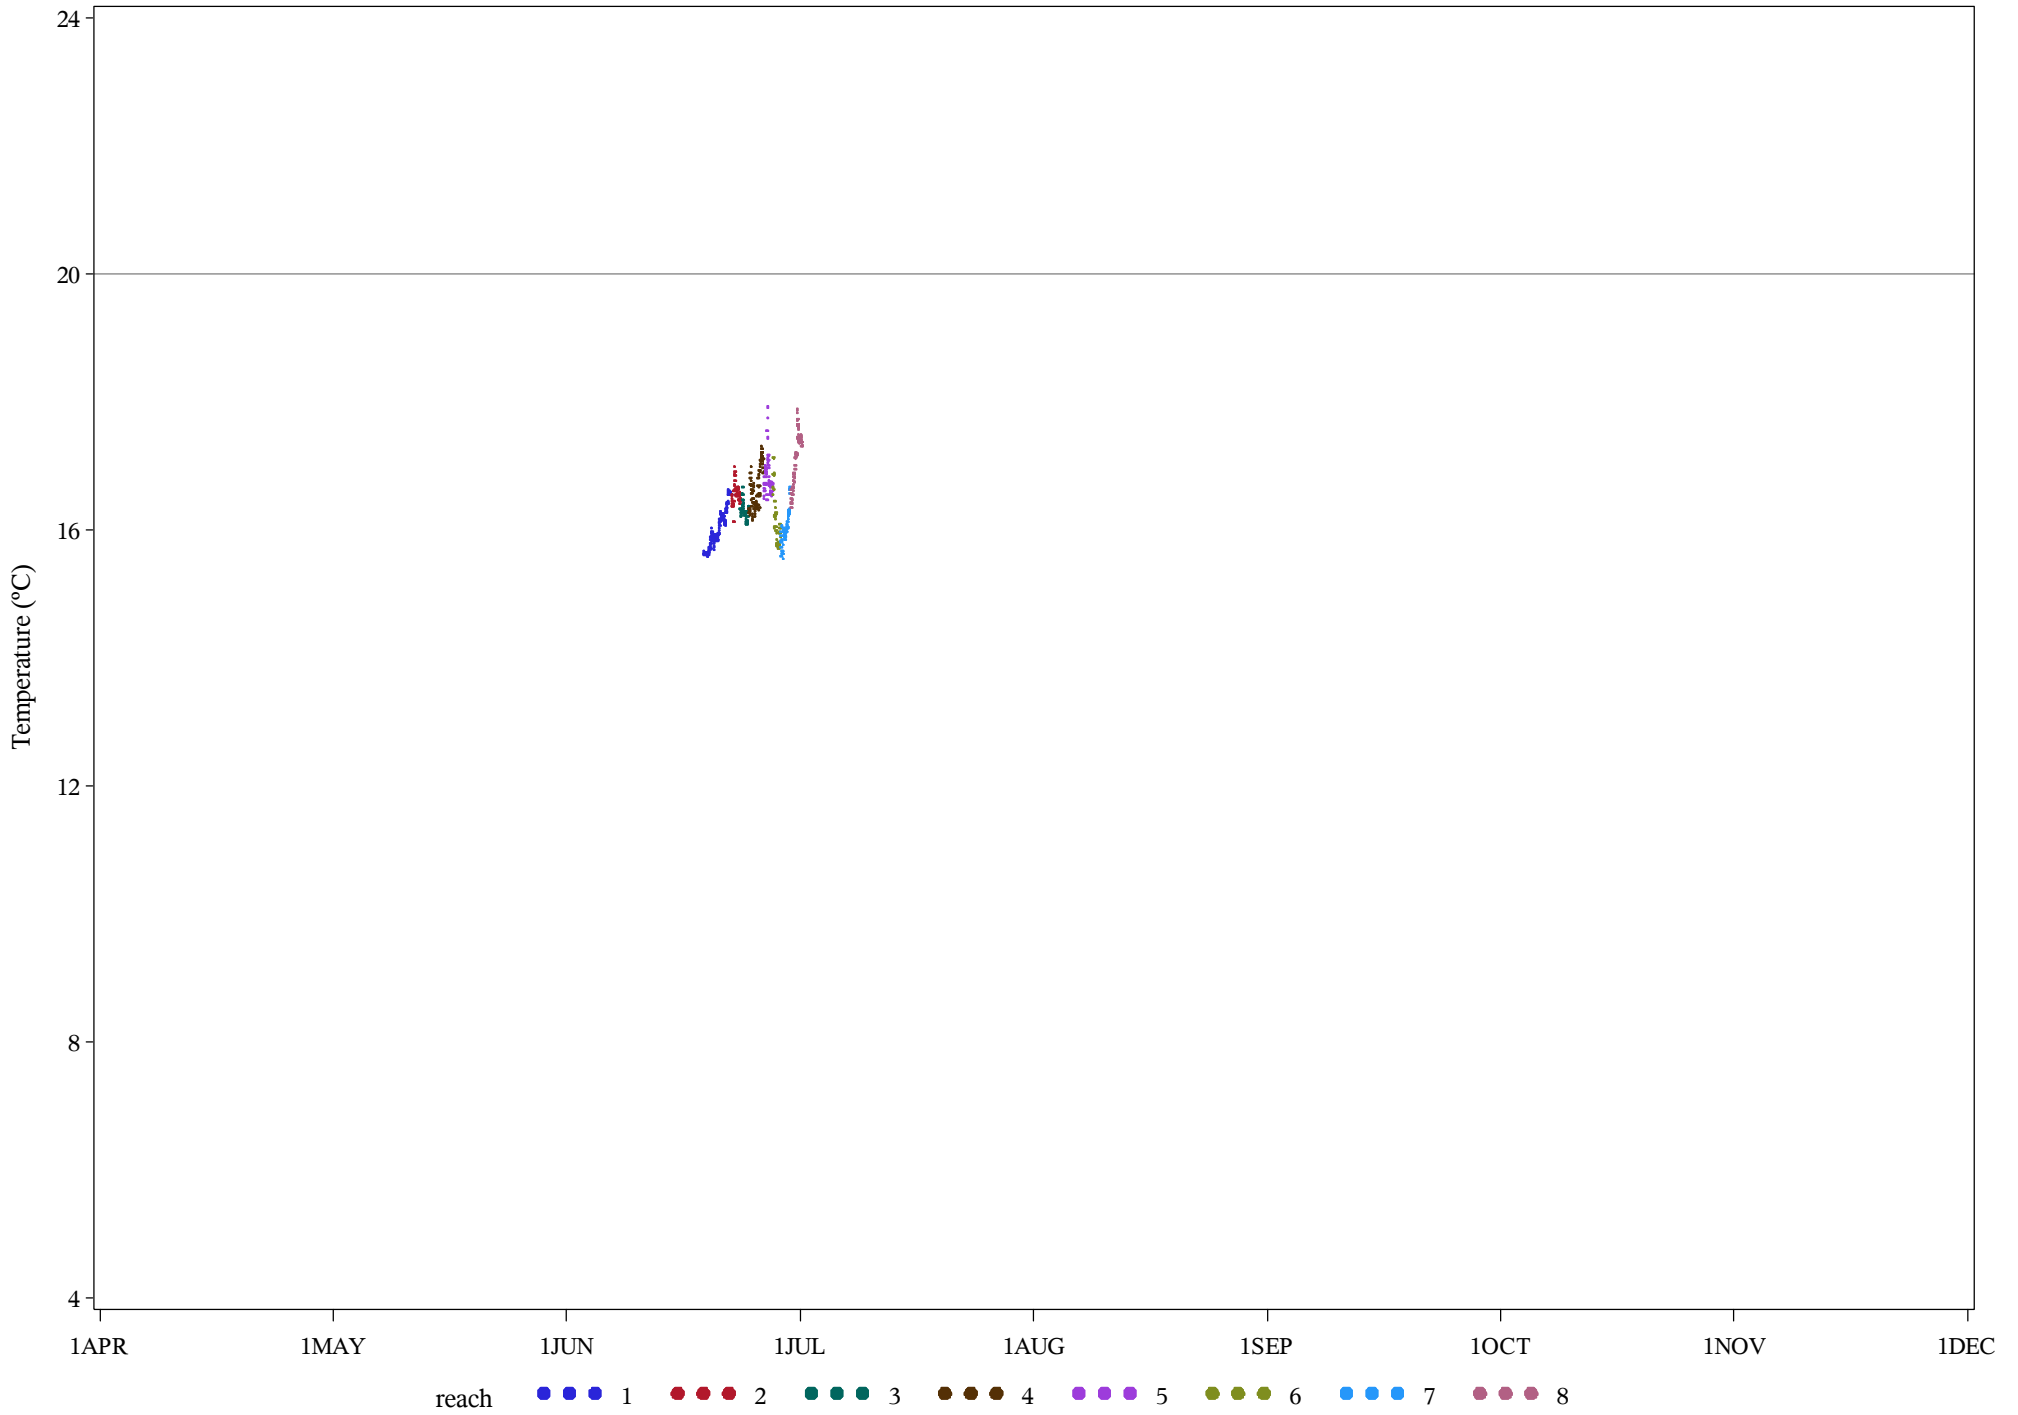

# Summer Chinook 4775A

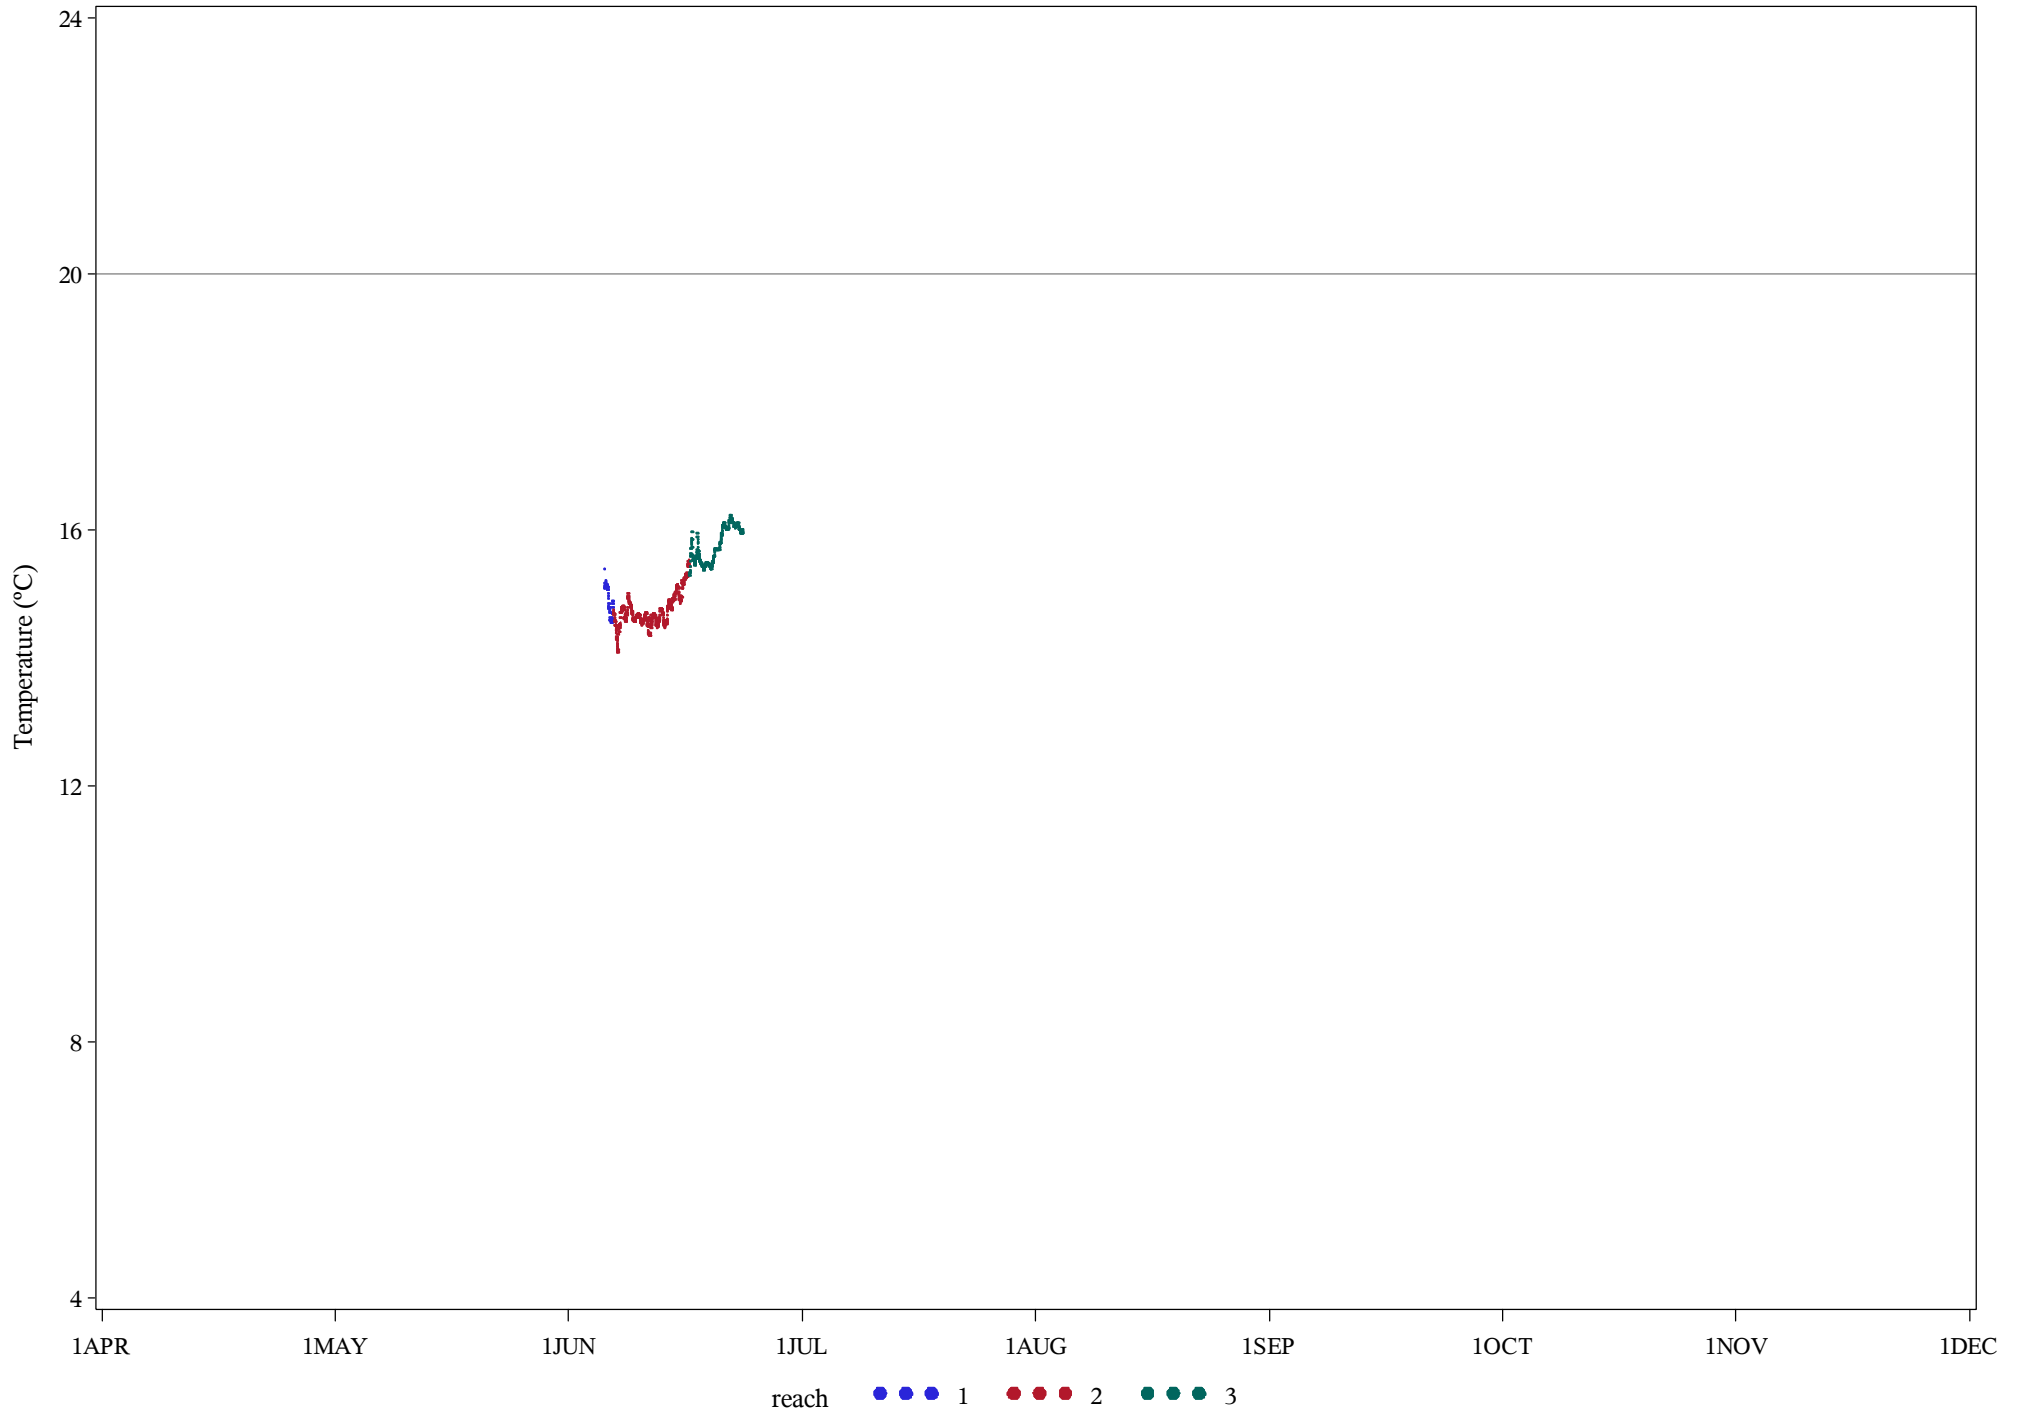

# Summer Chinook 4786A

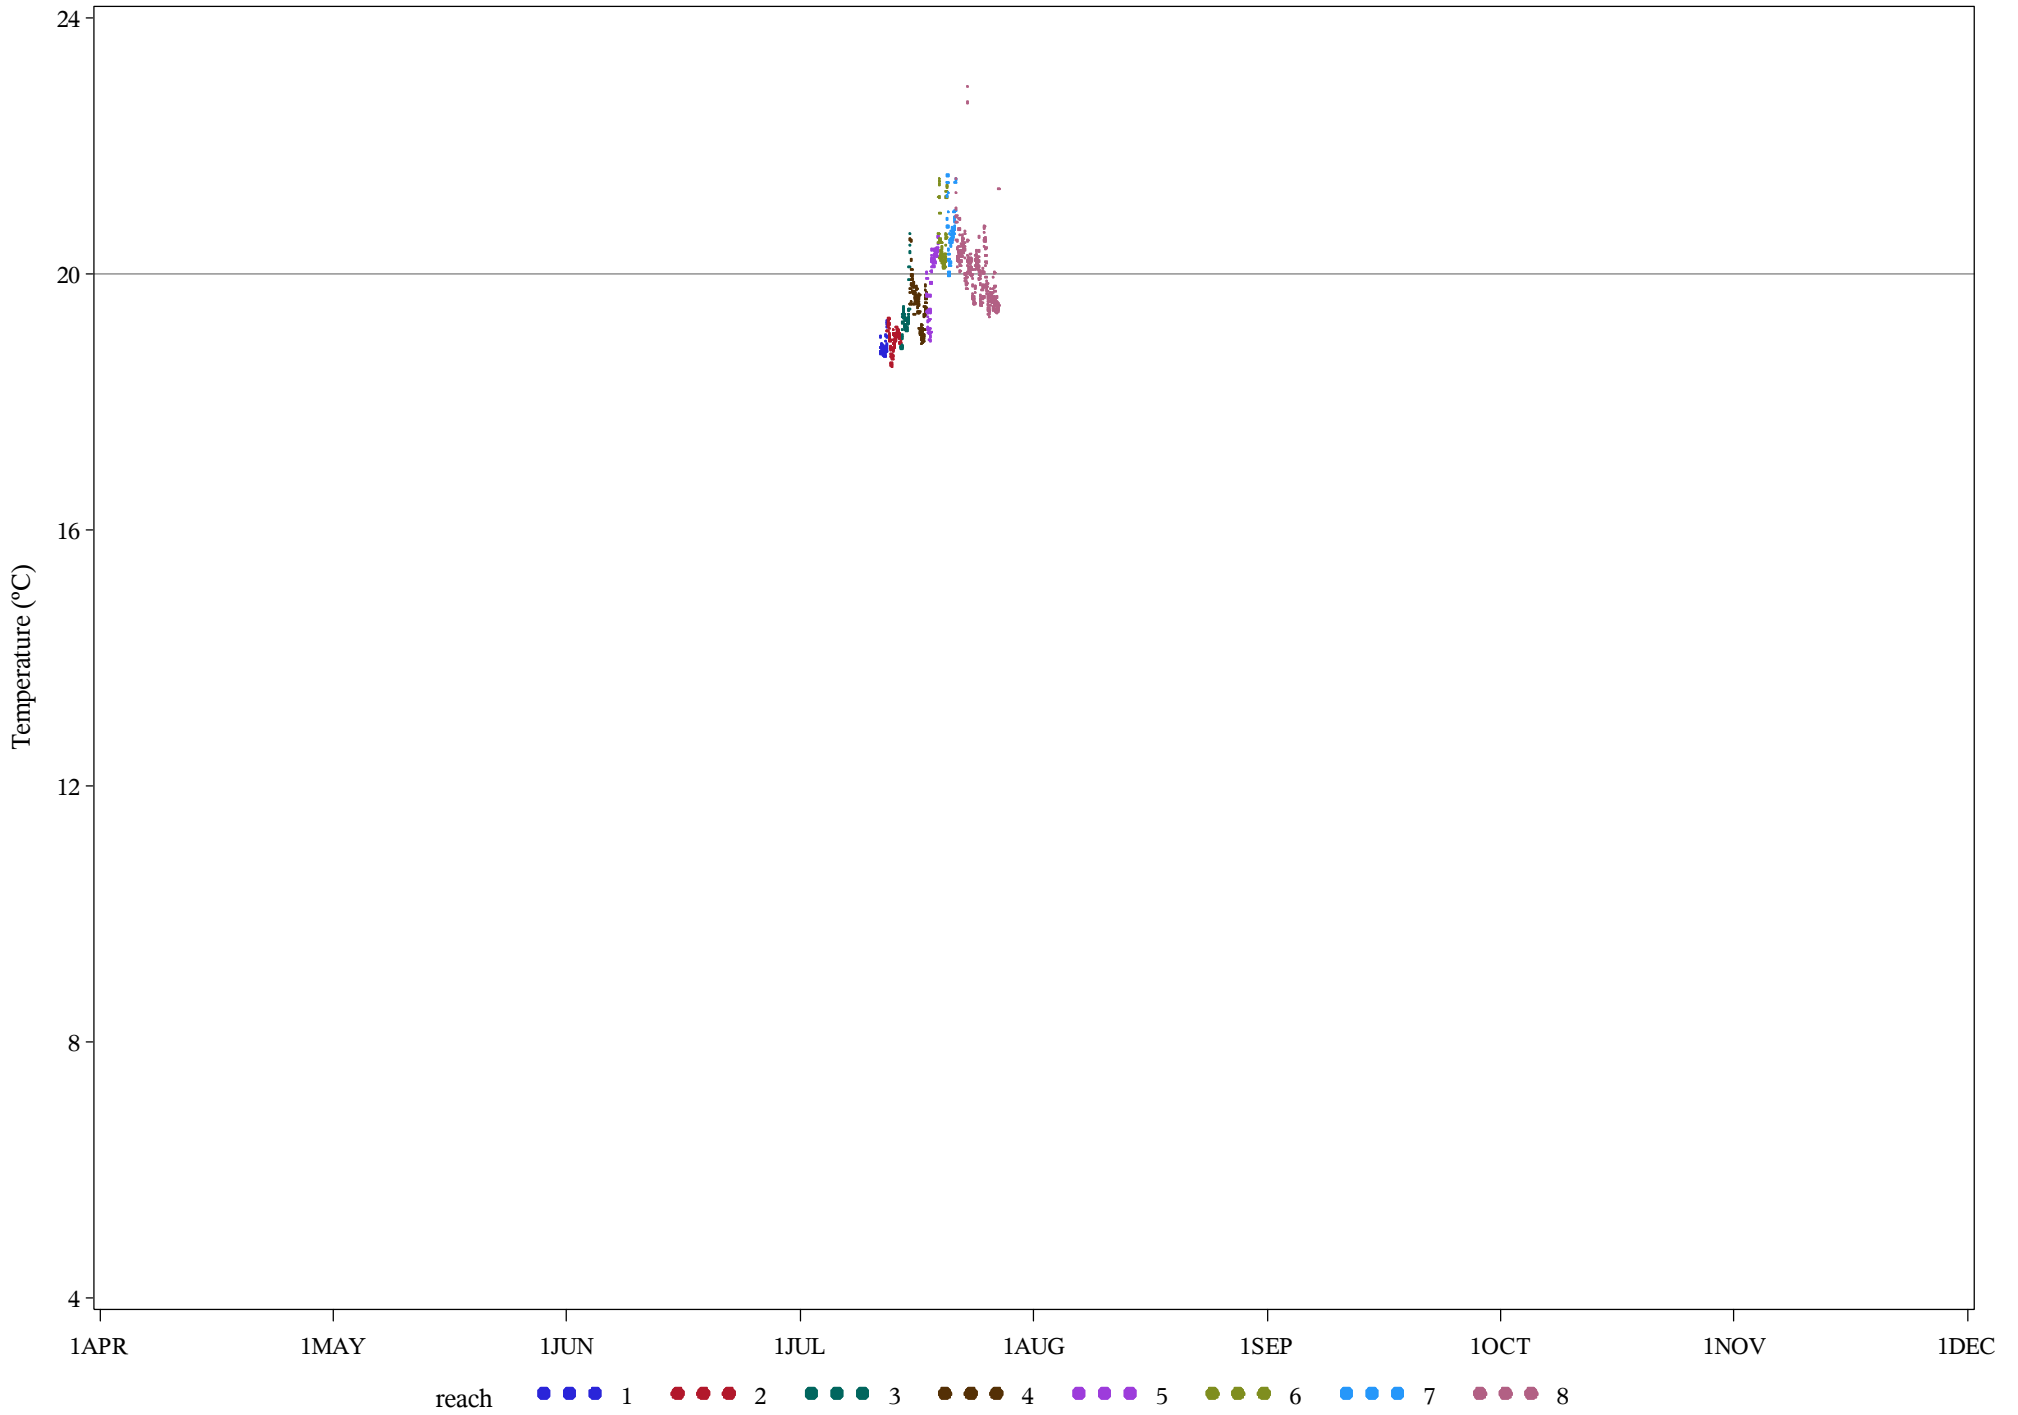

# Summer Chinook 4813A

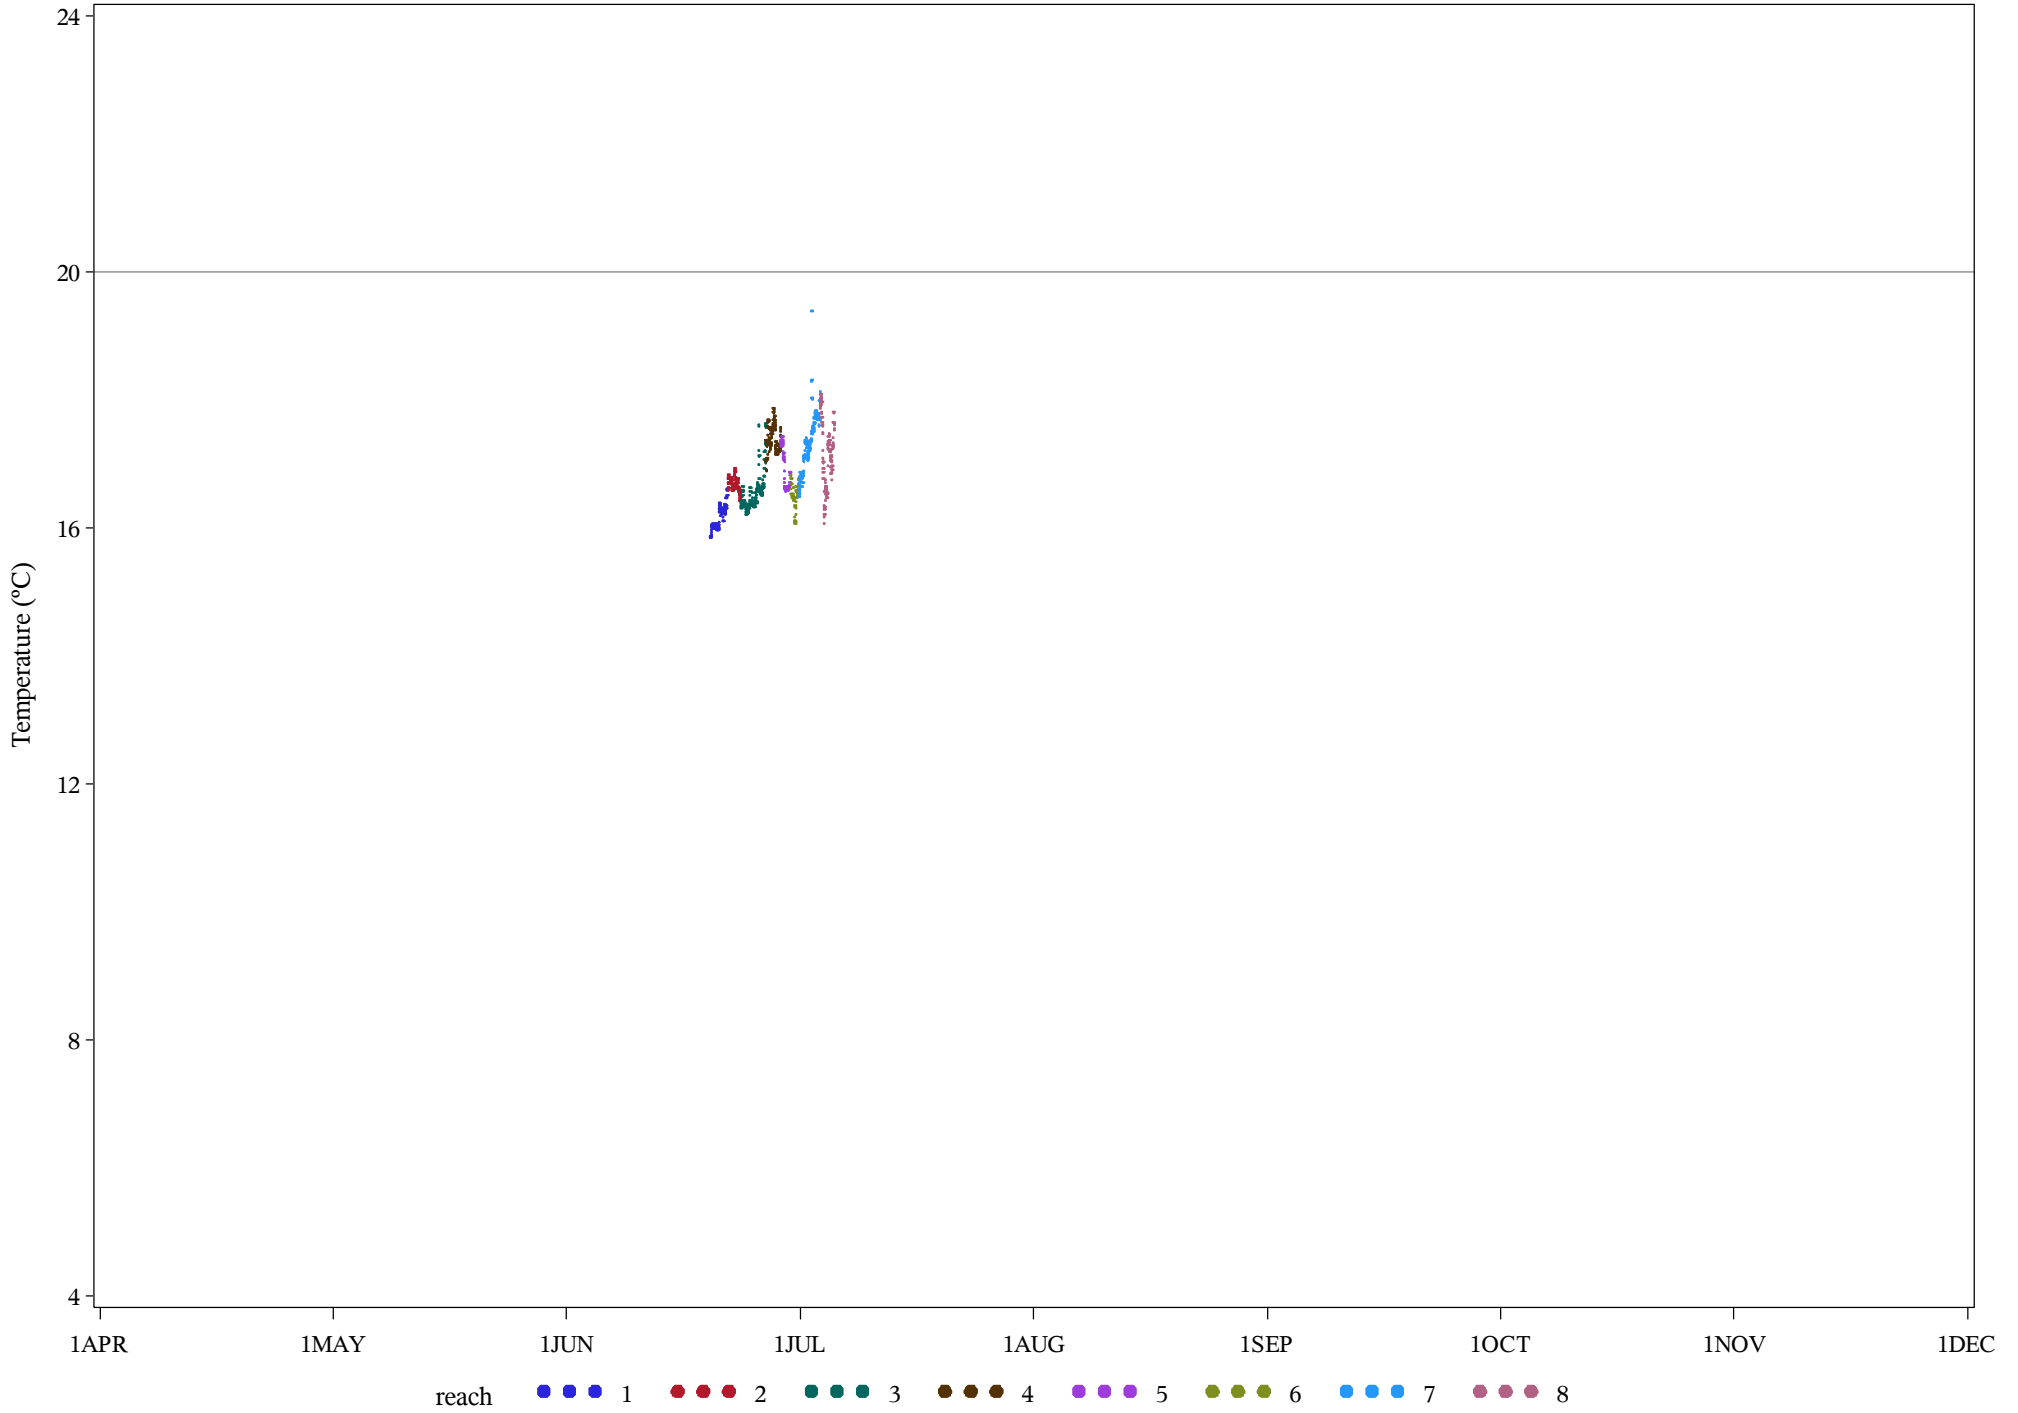

# Summer Chinook 4814A

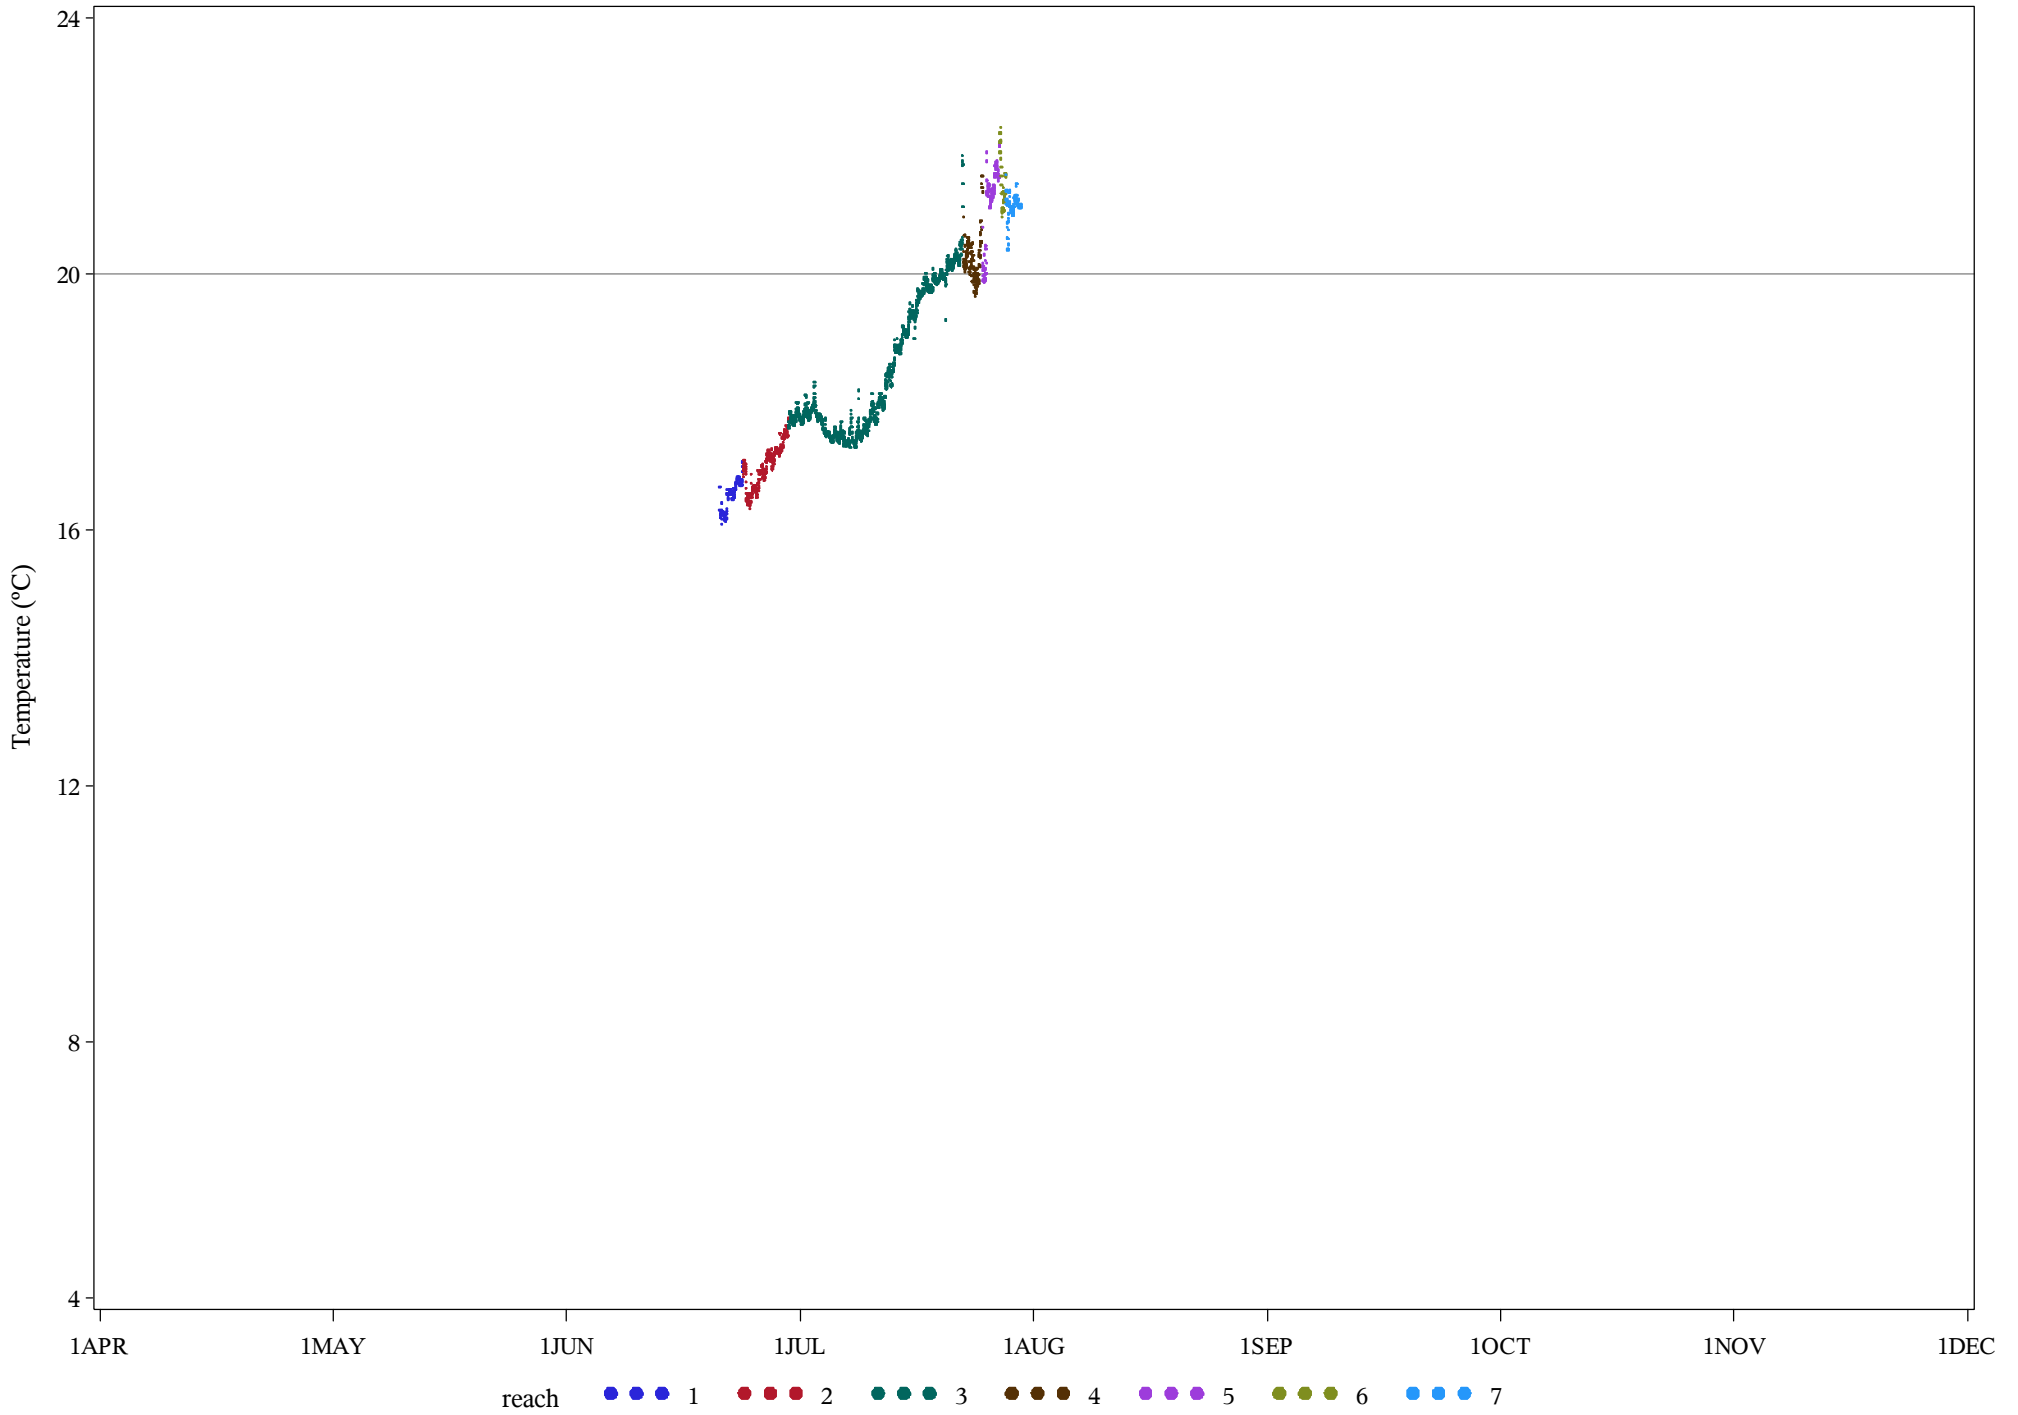

# Summer Chinook 4817A

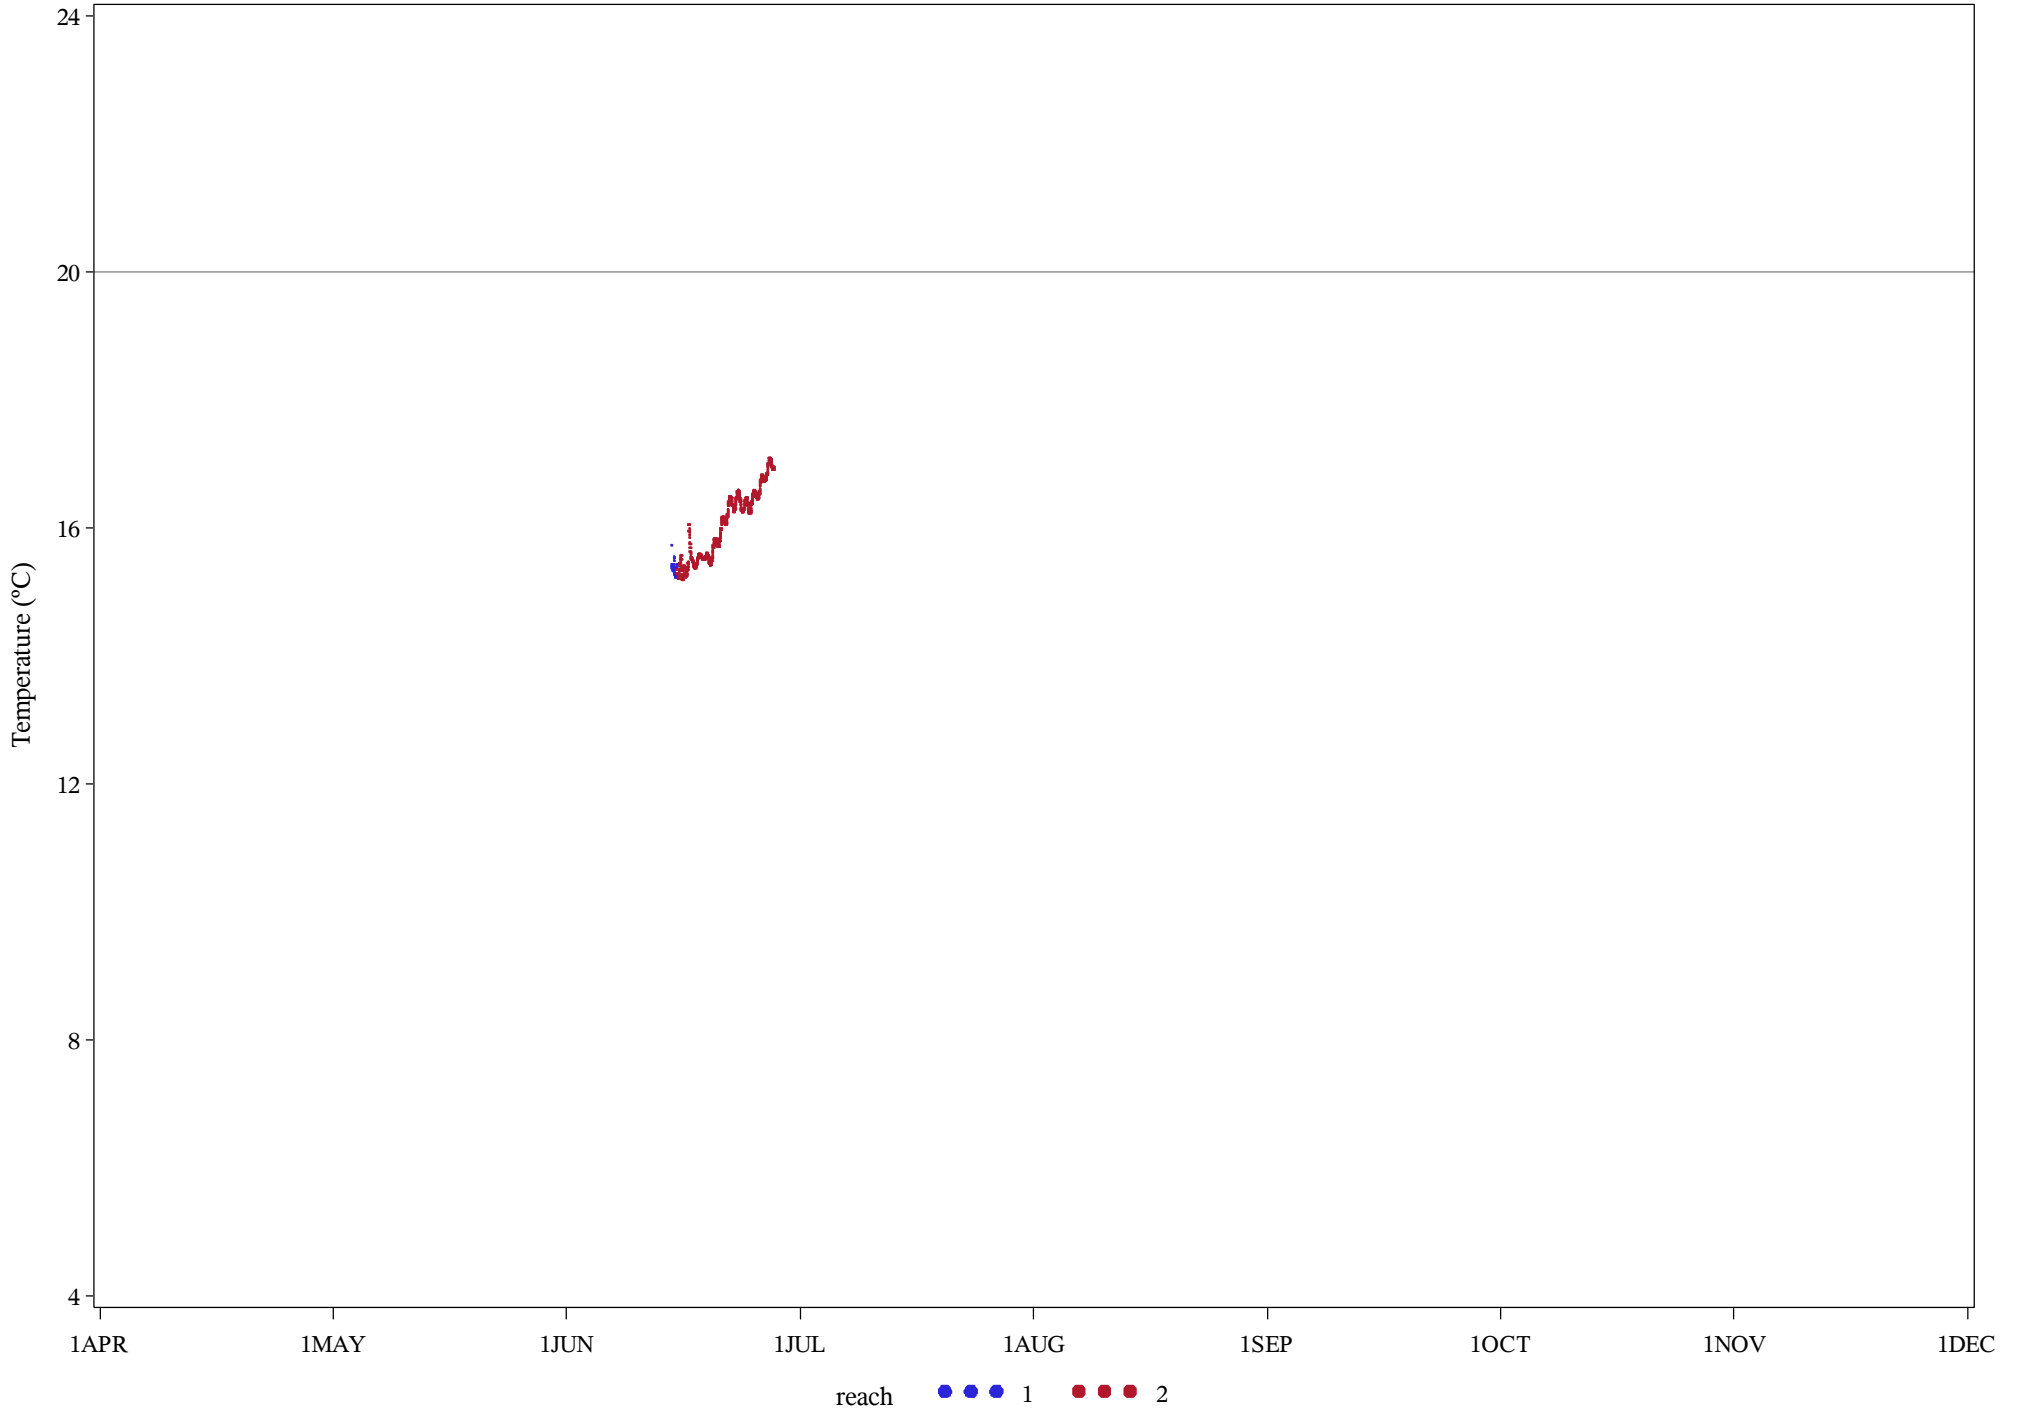





# Summer Chinook 4829A

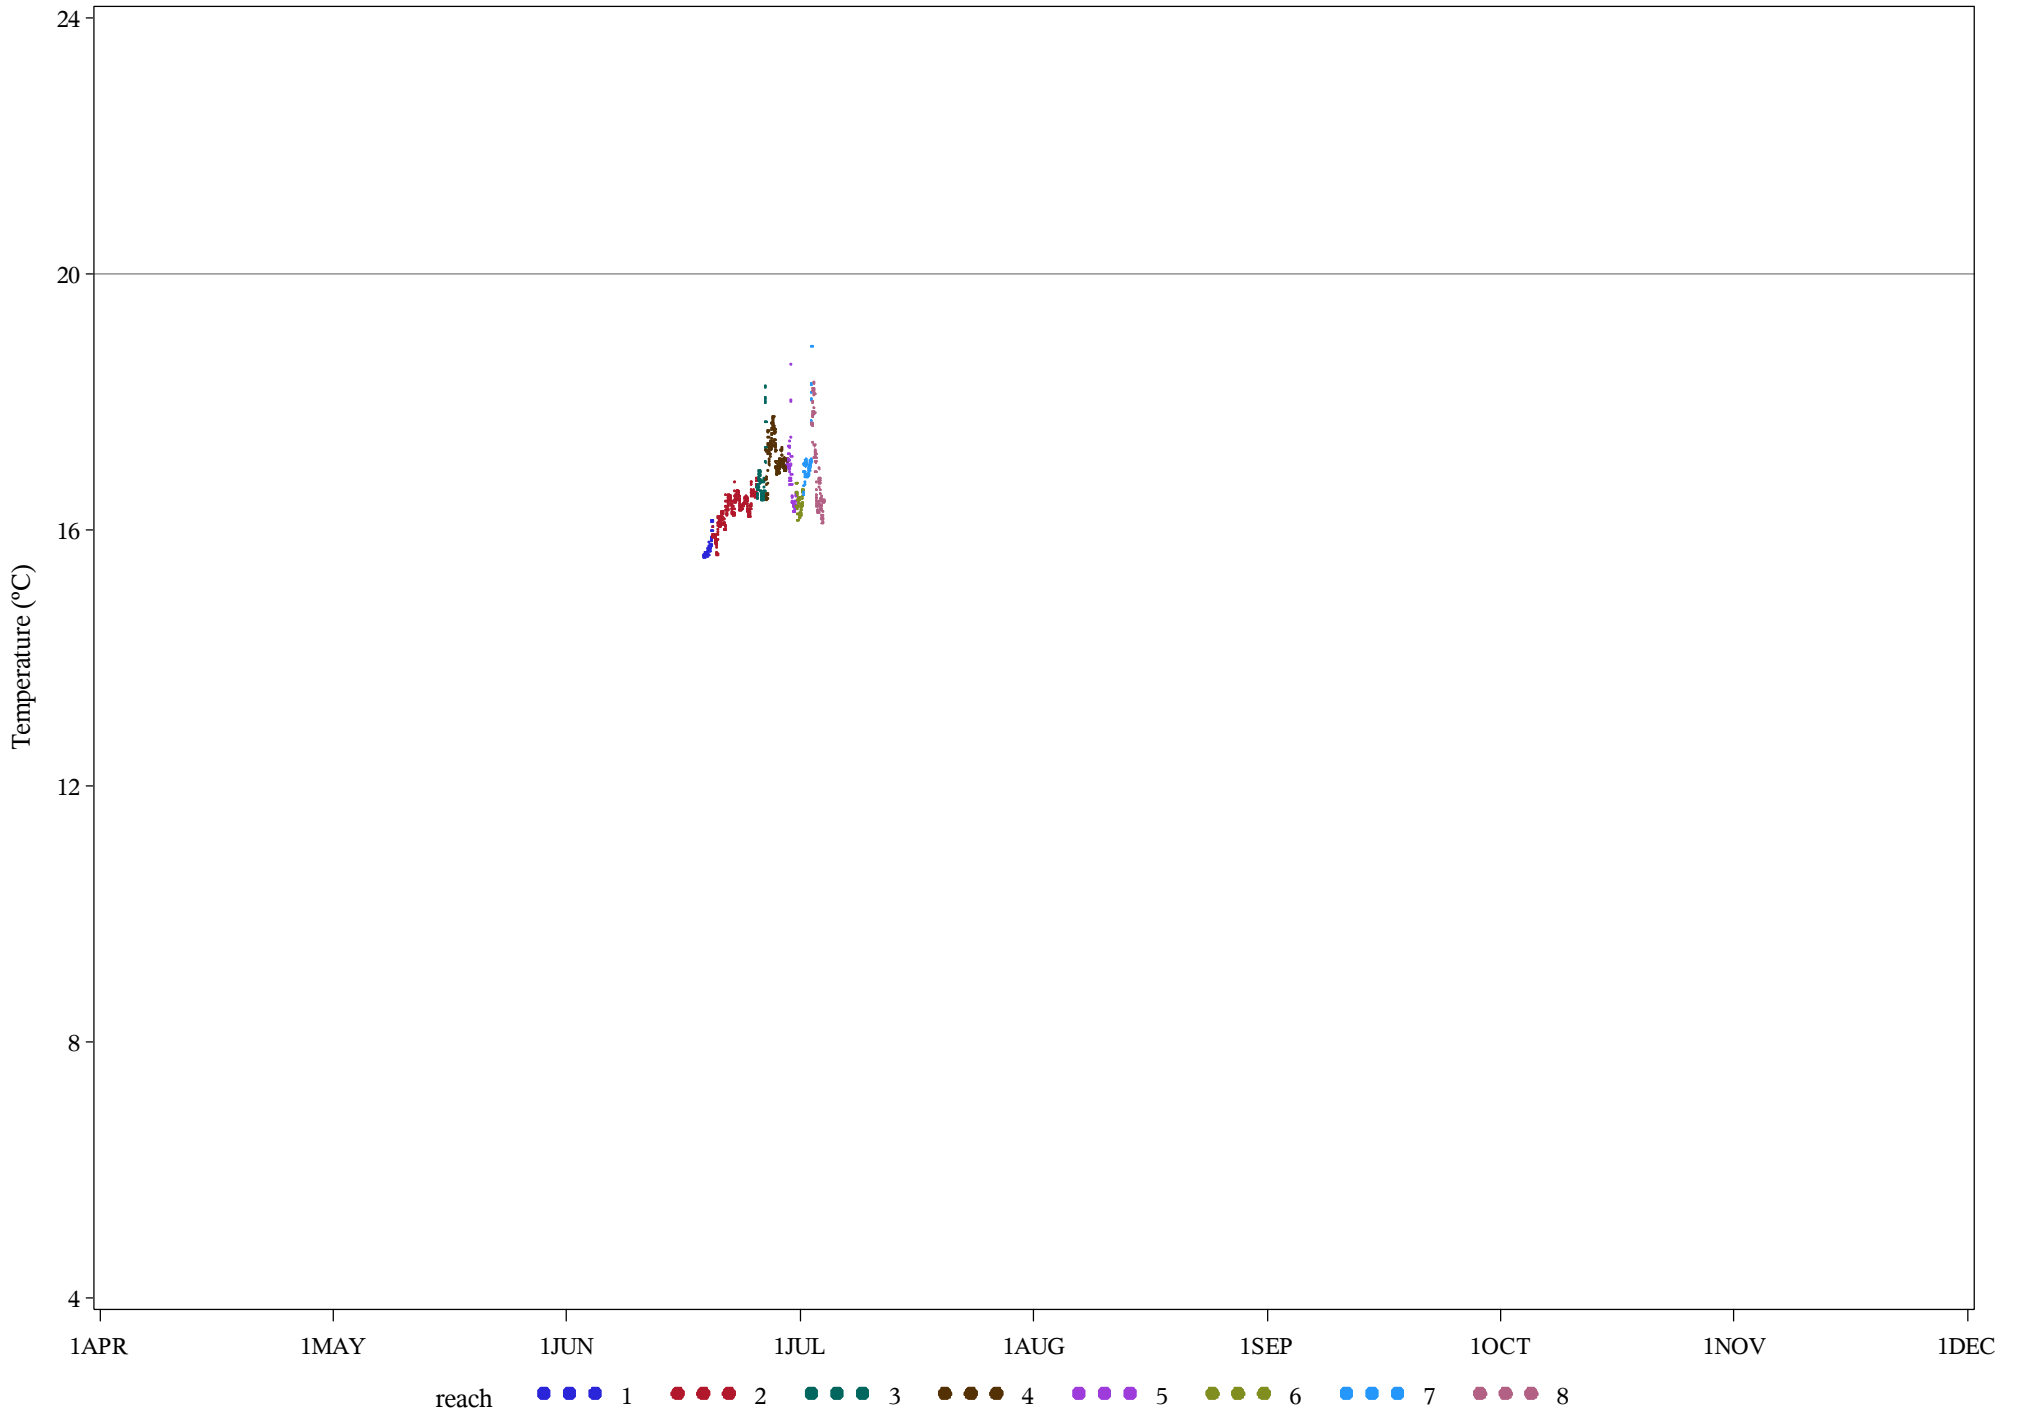

# Summer Chinook 4837A

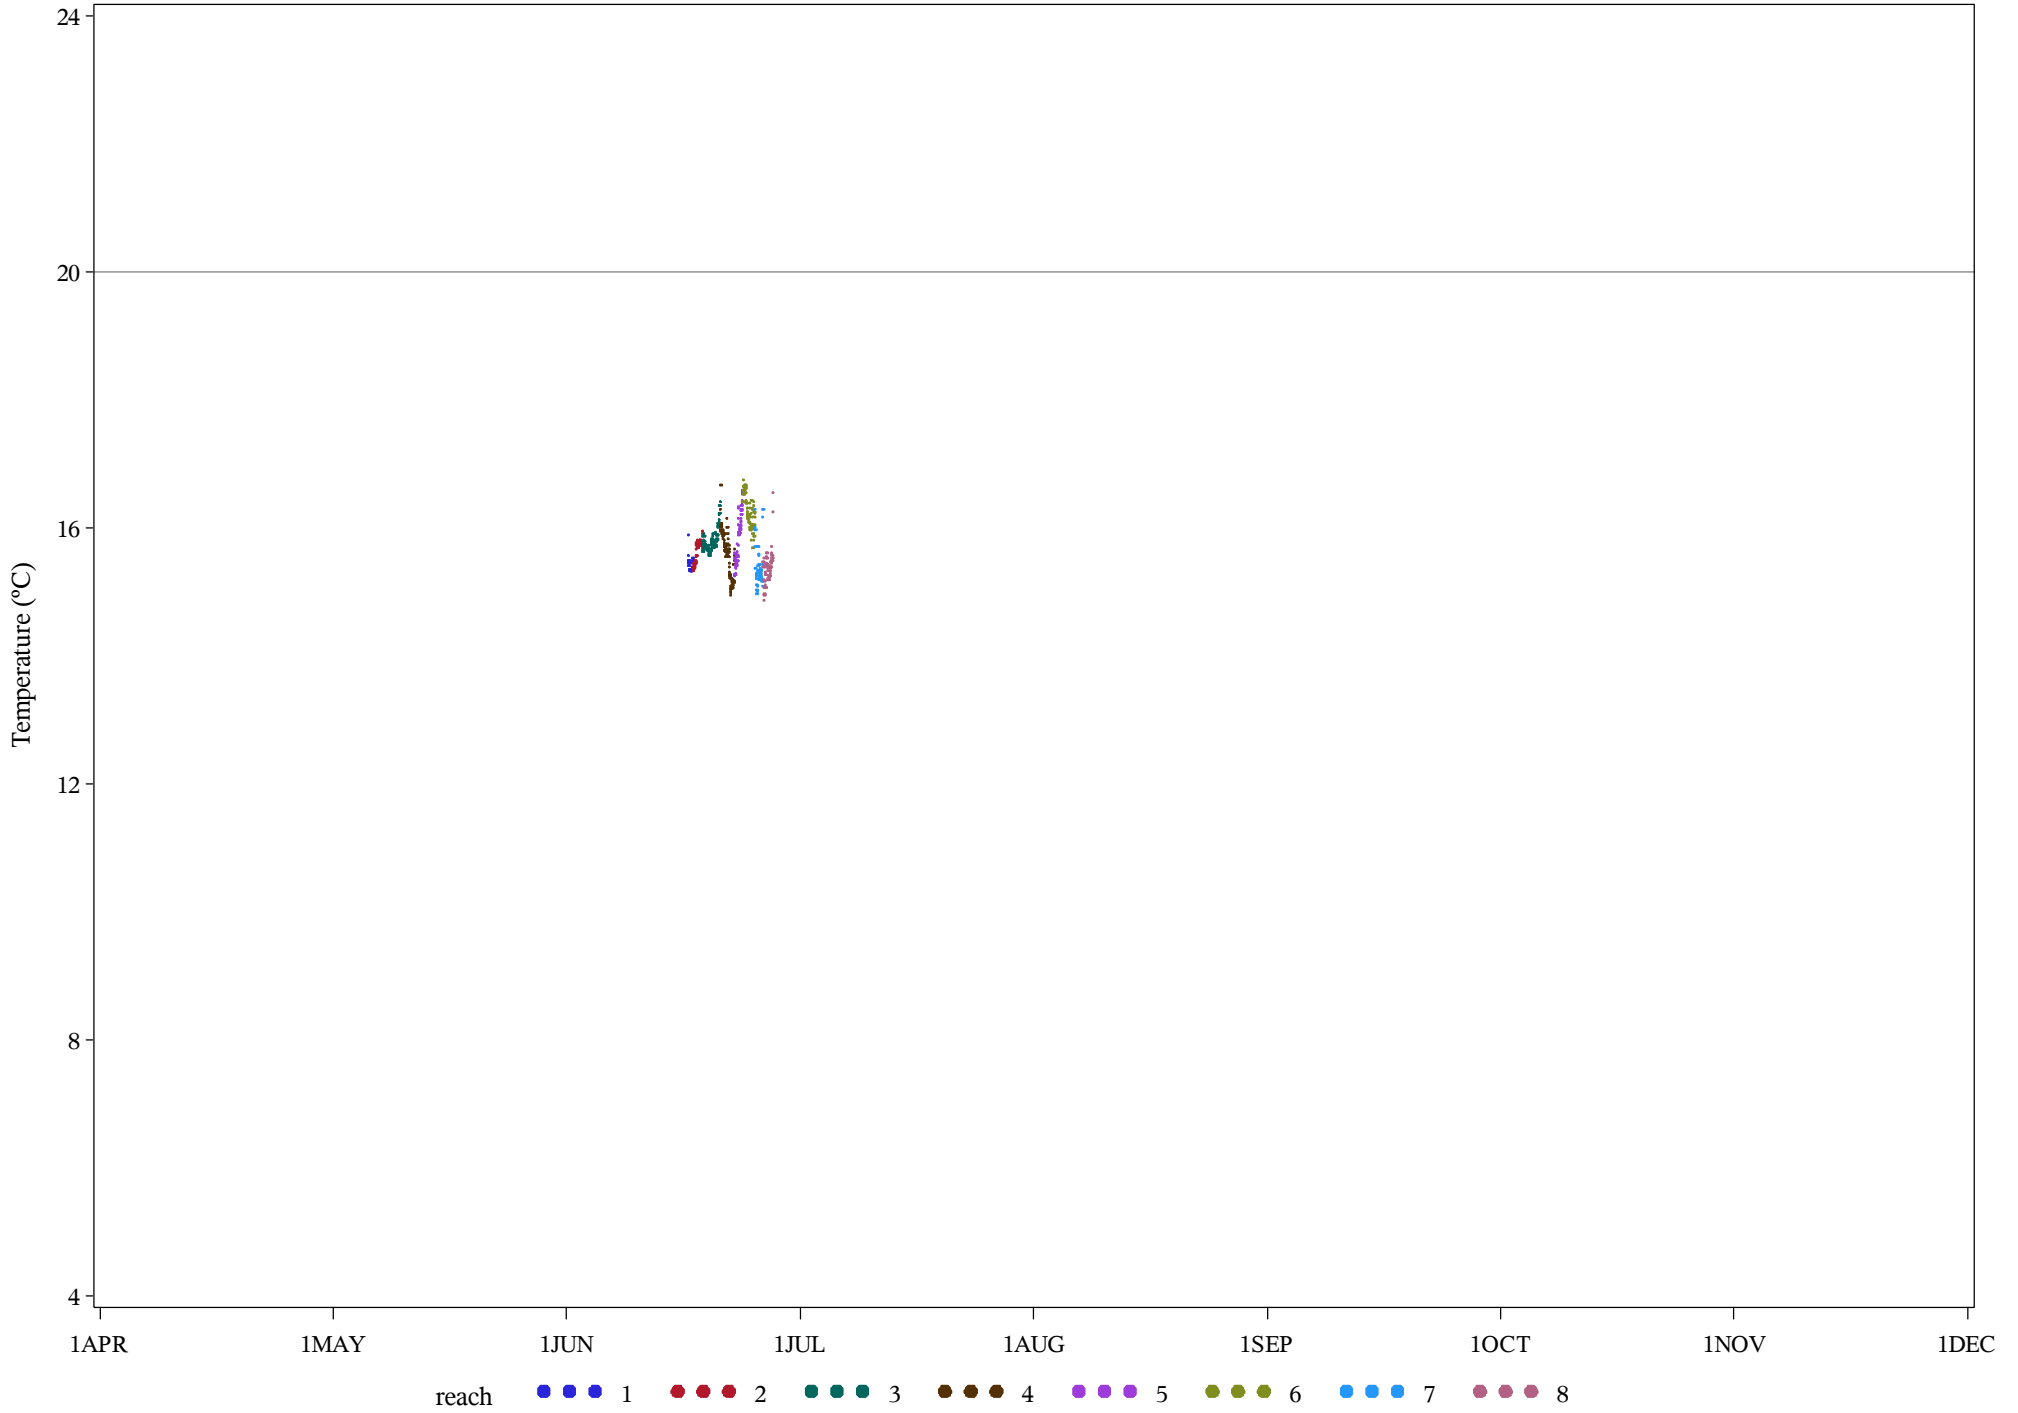

# Summer Chinook 4844A

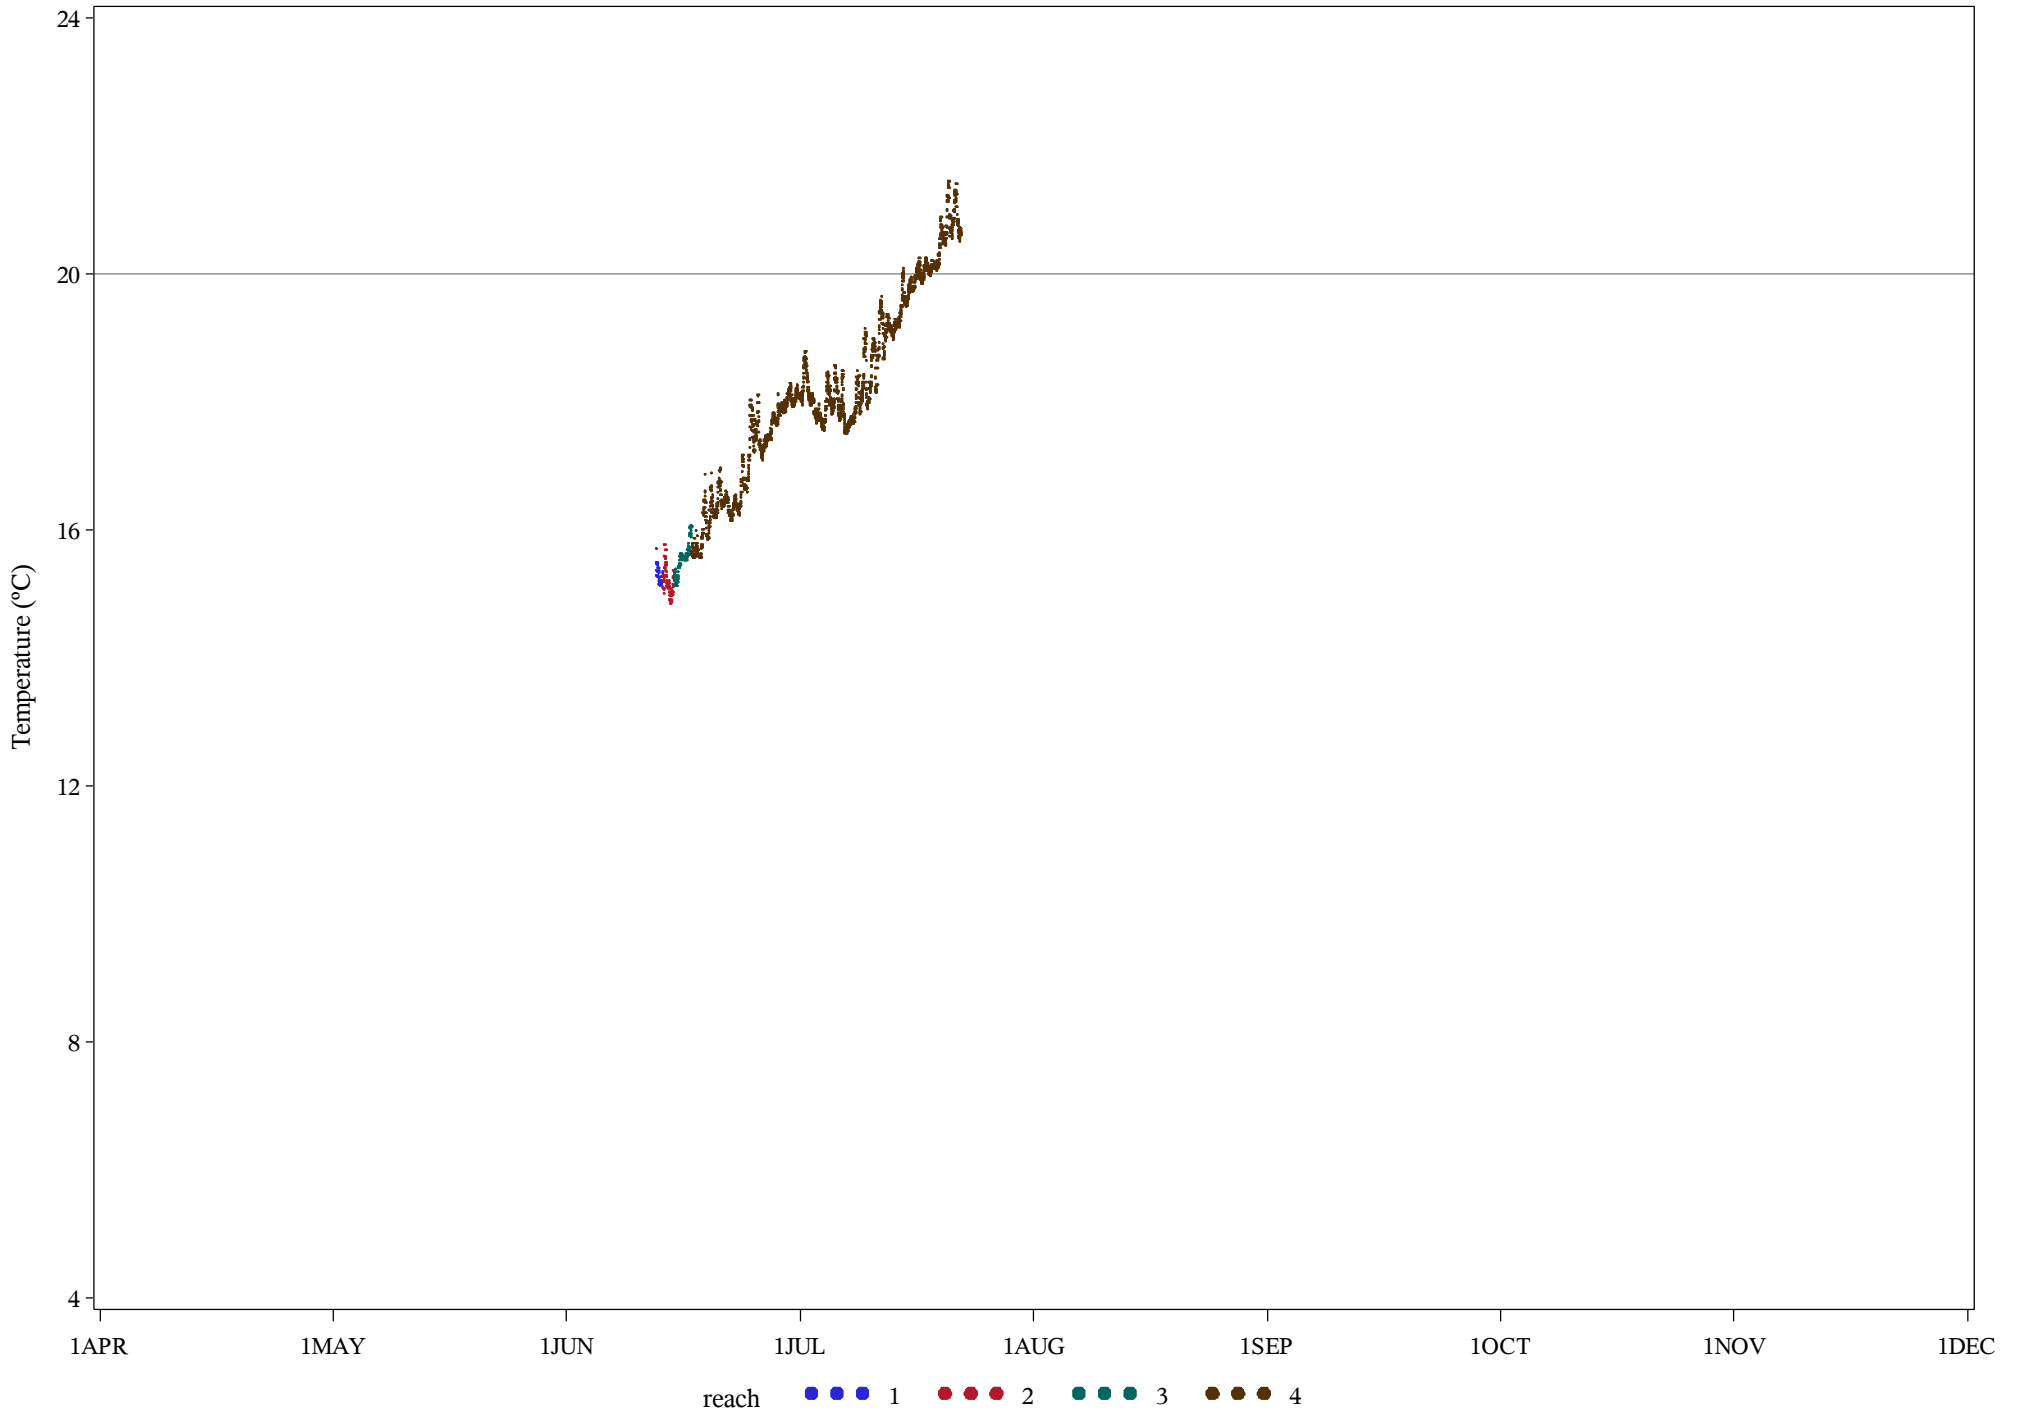

# Summer Chinook 4869A

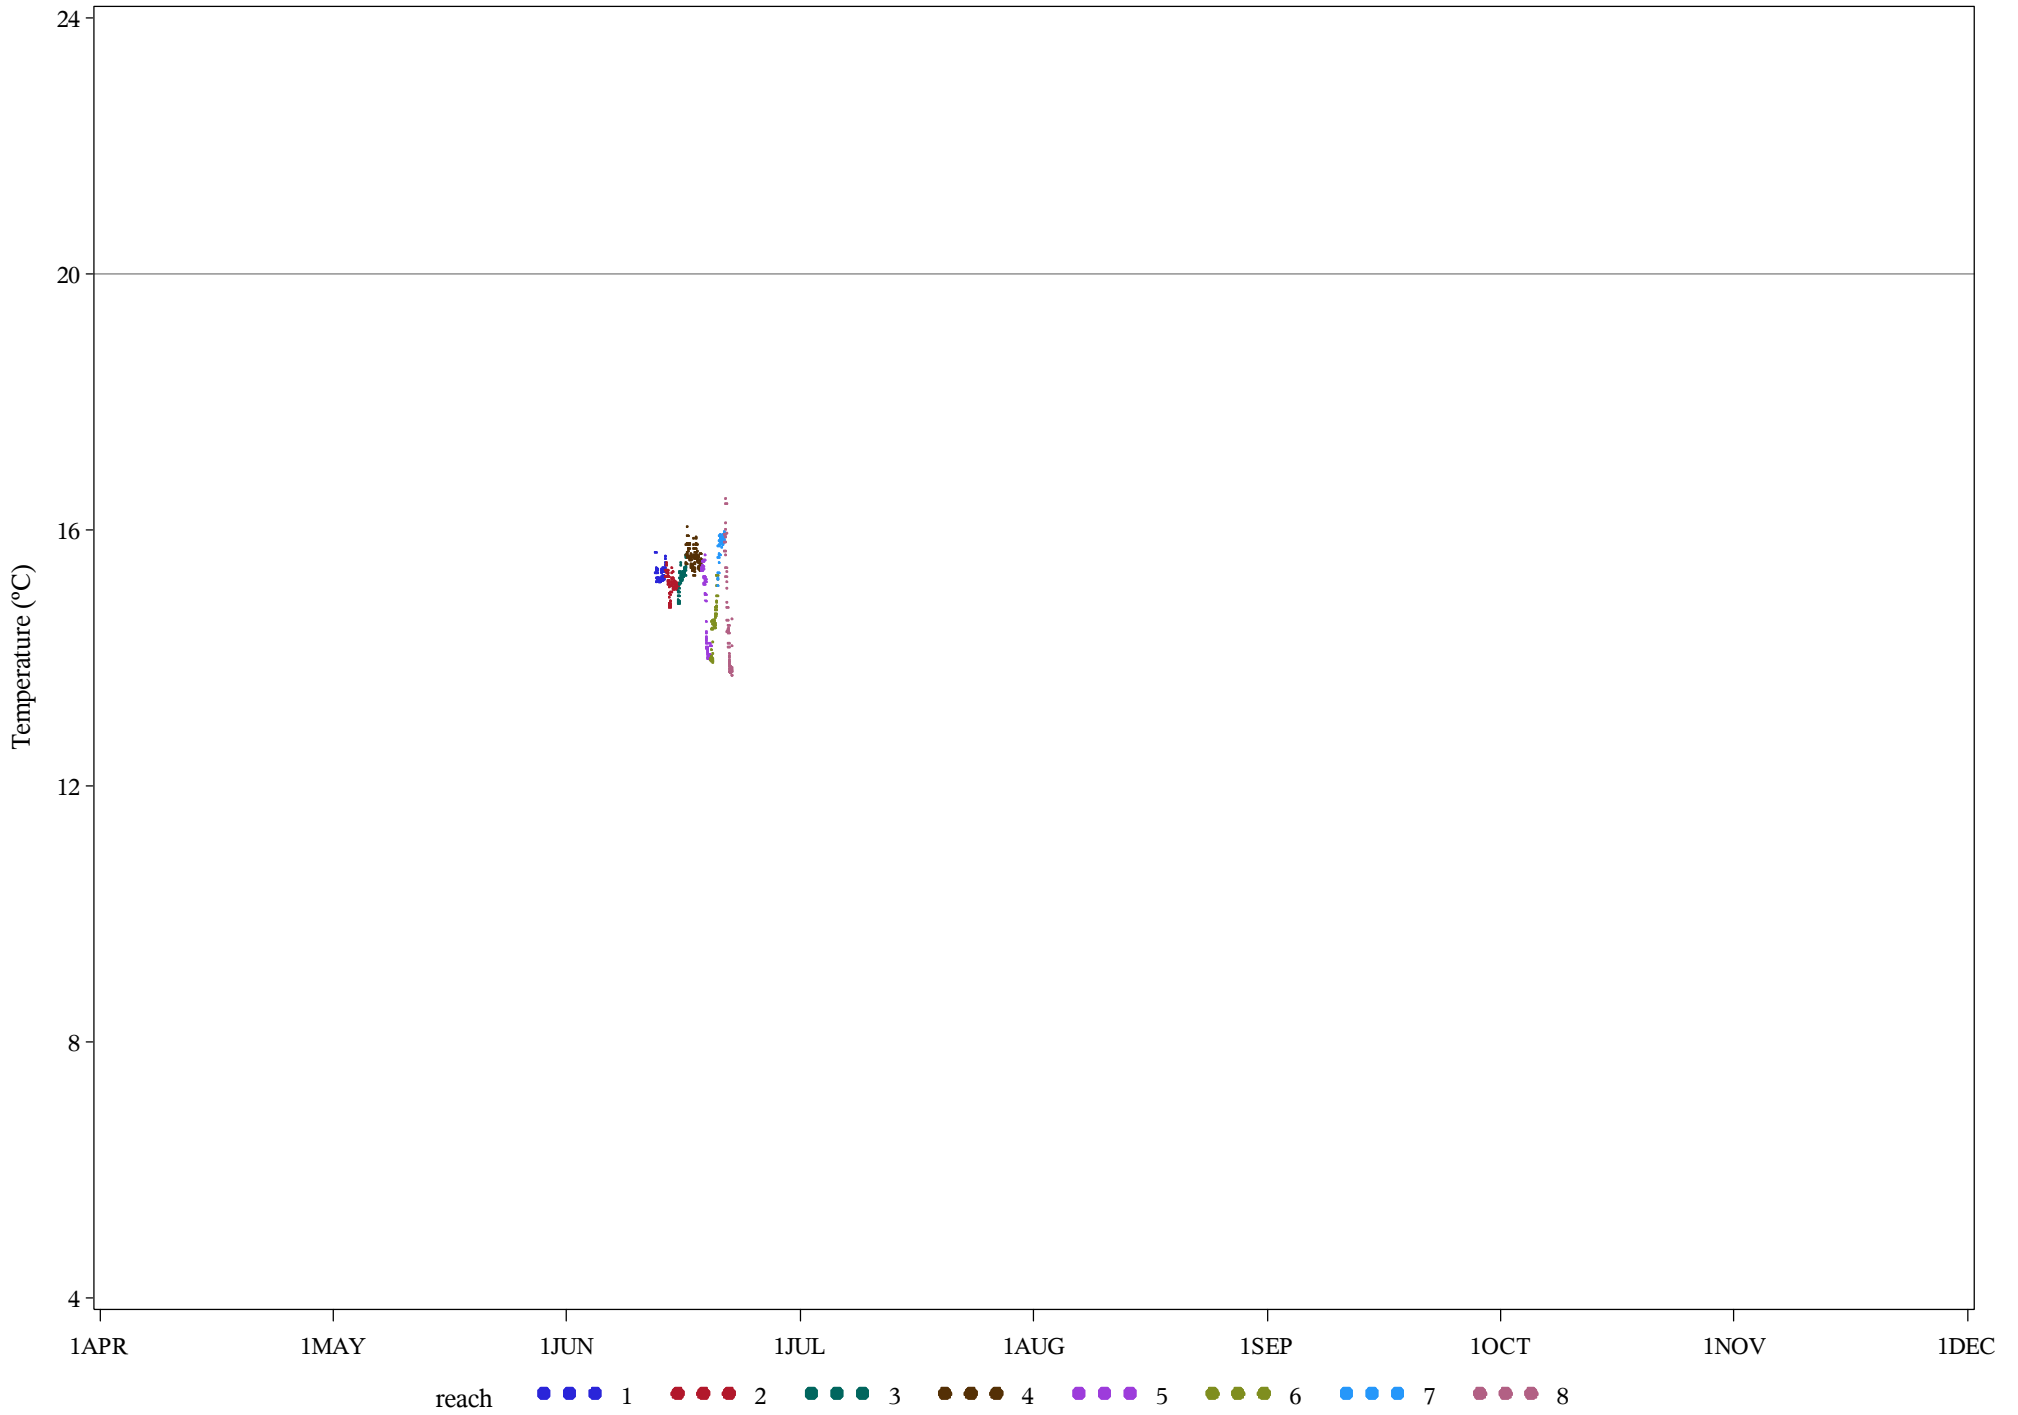

# Summer Chinook 4878A

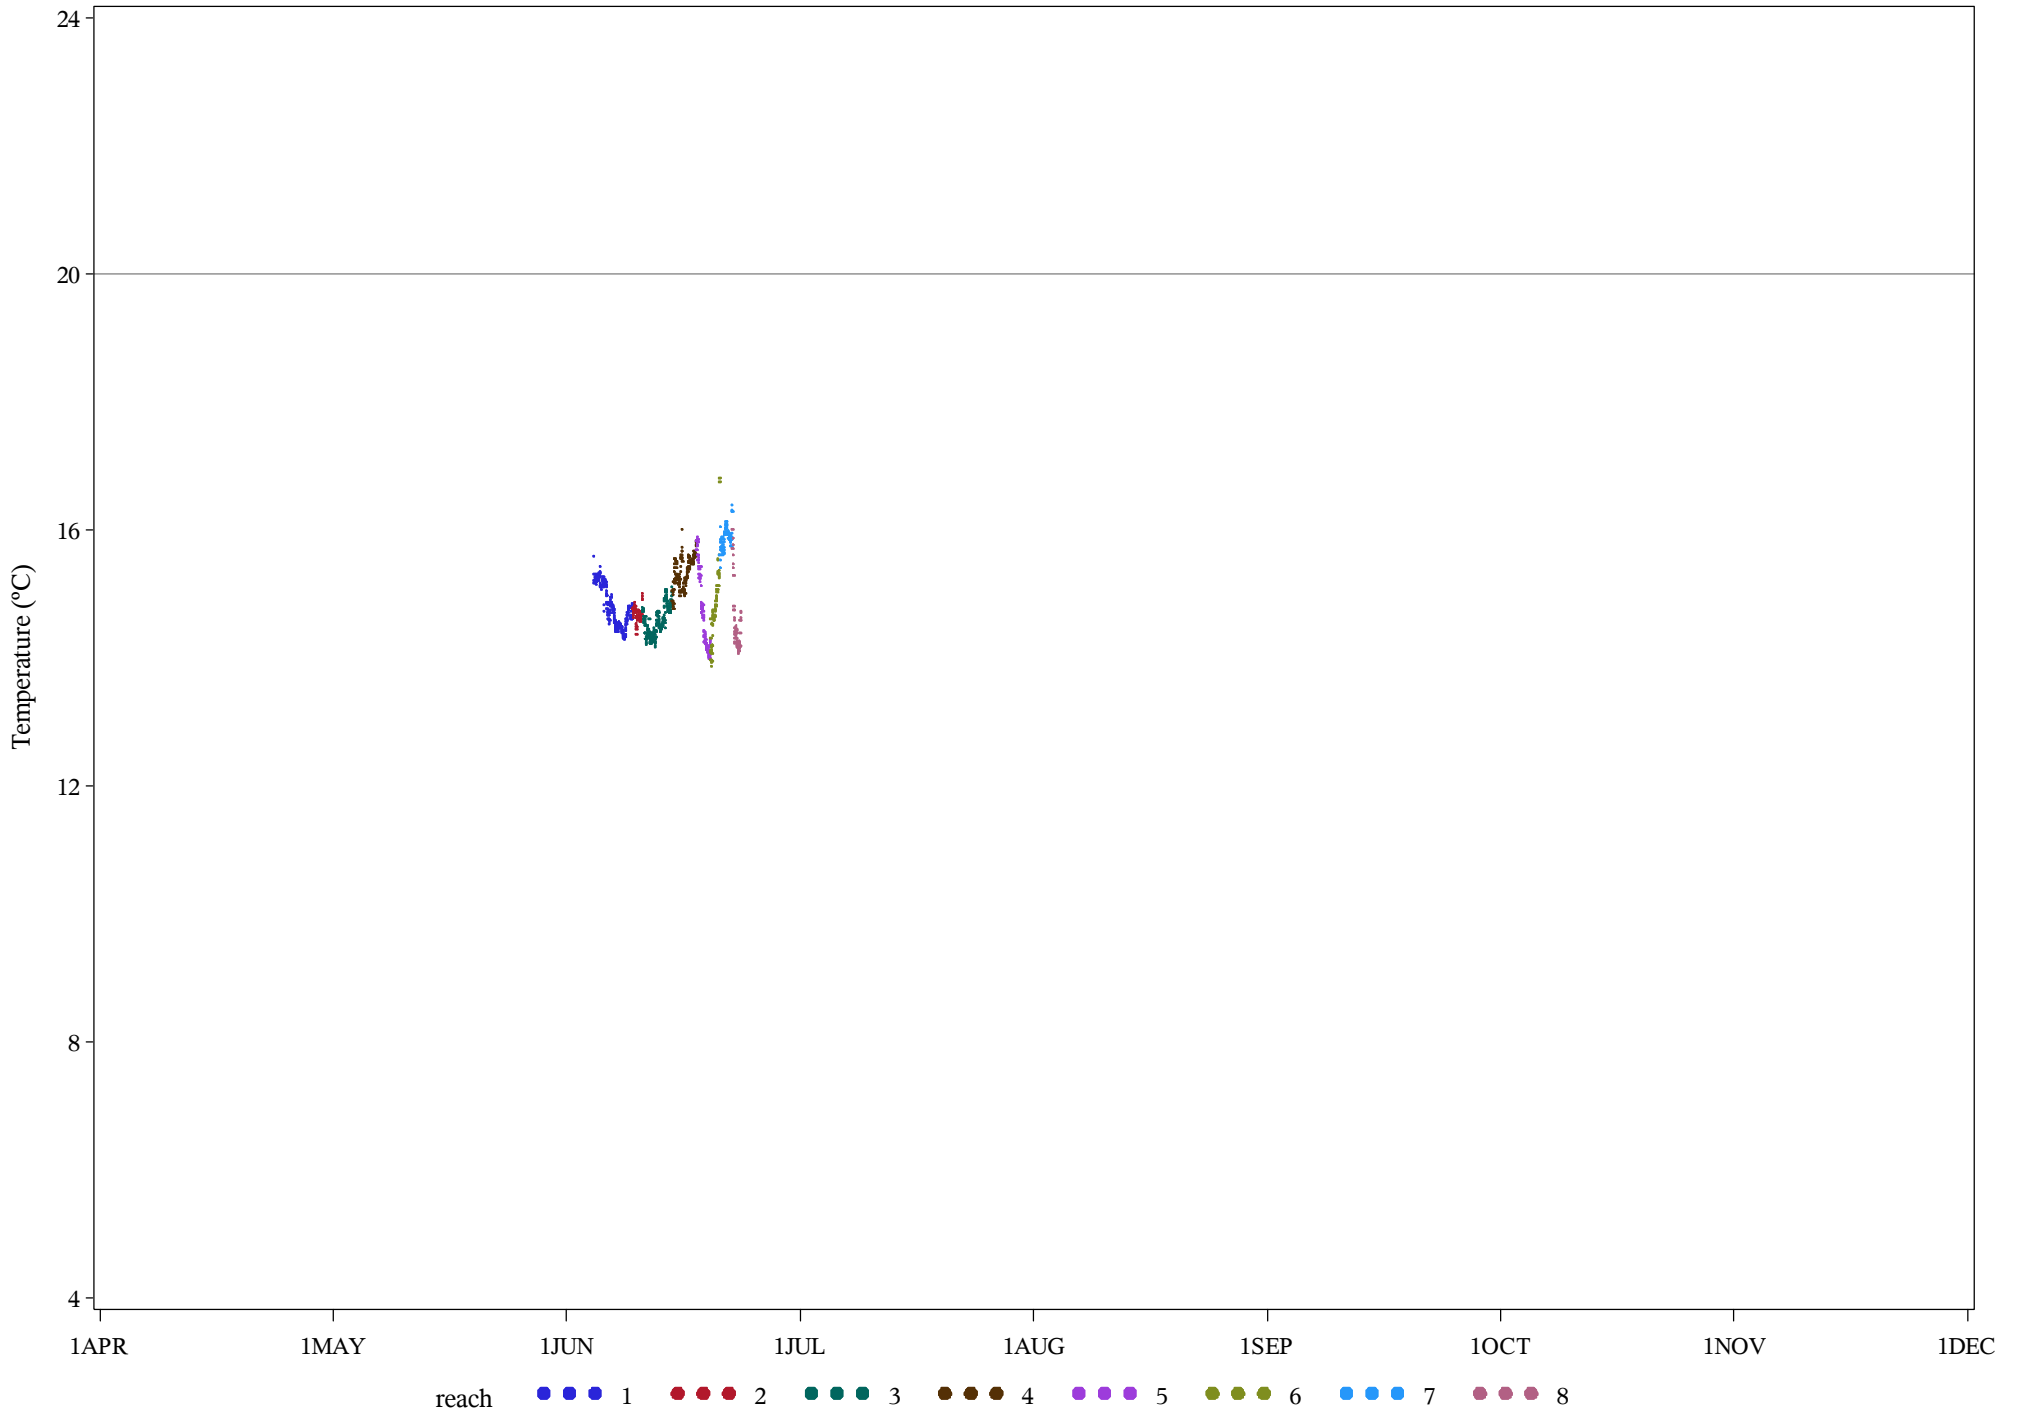







# Summer Chinook 4934A

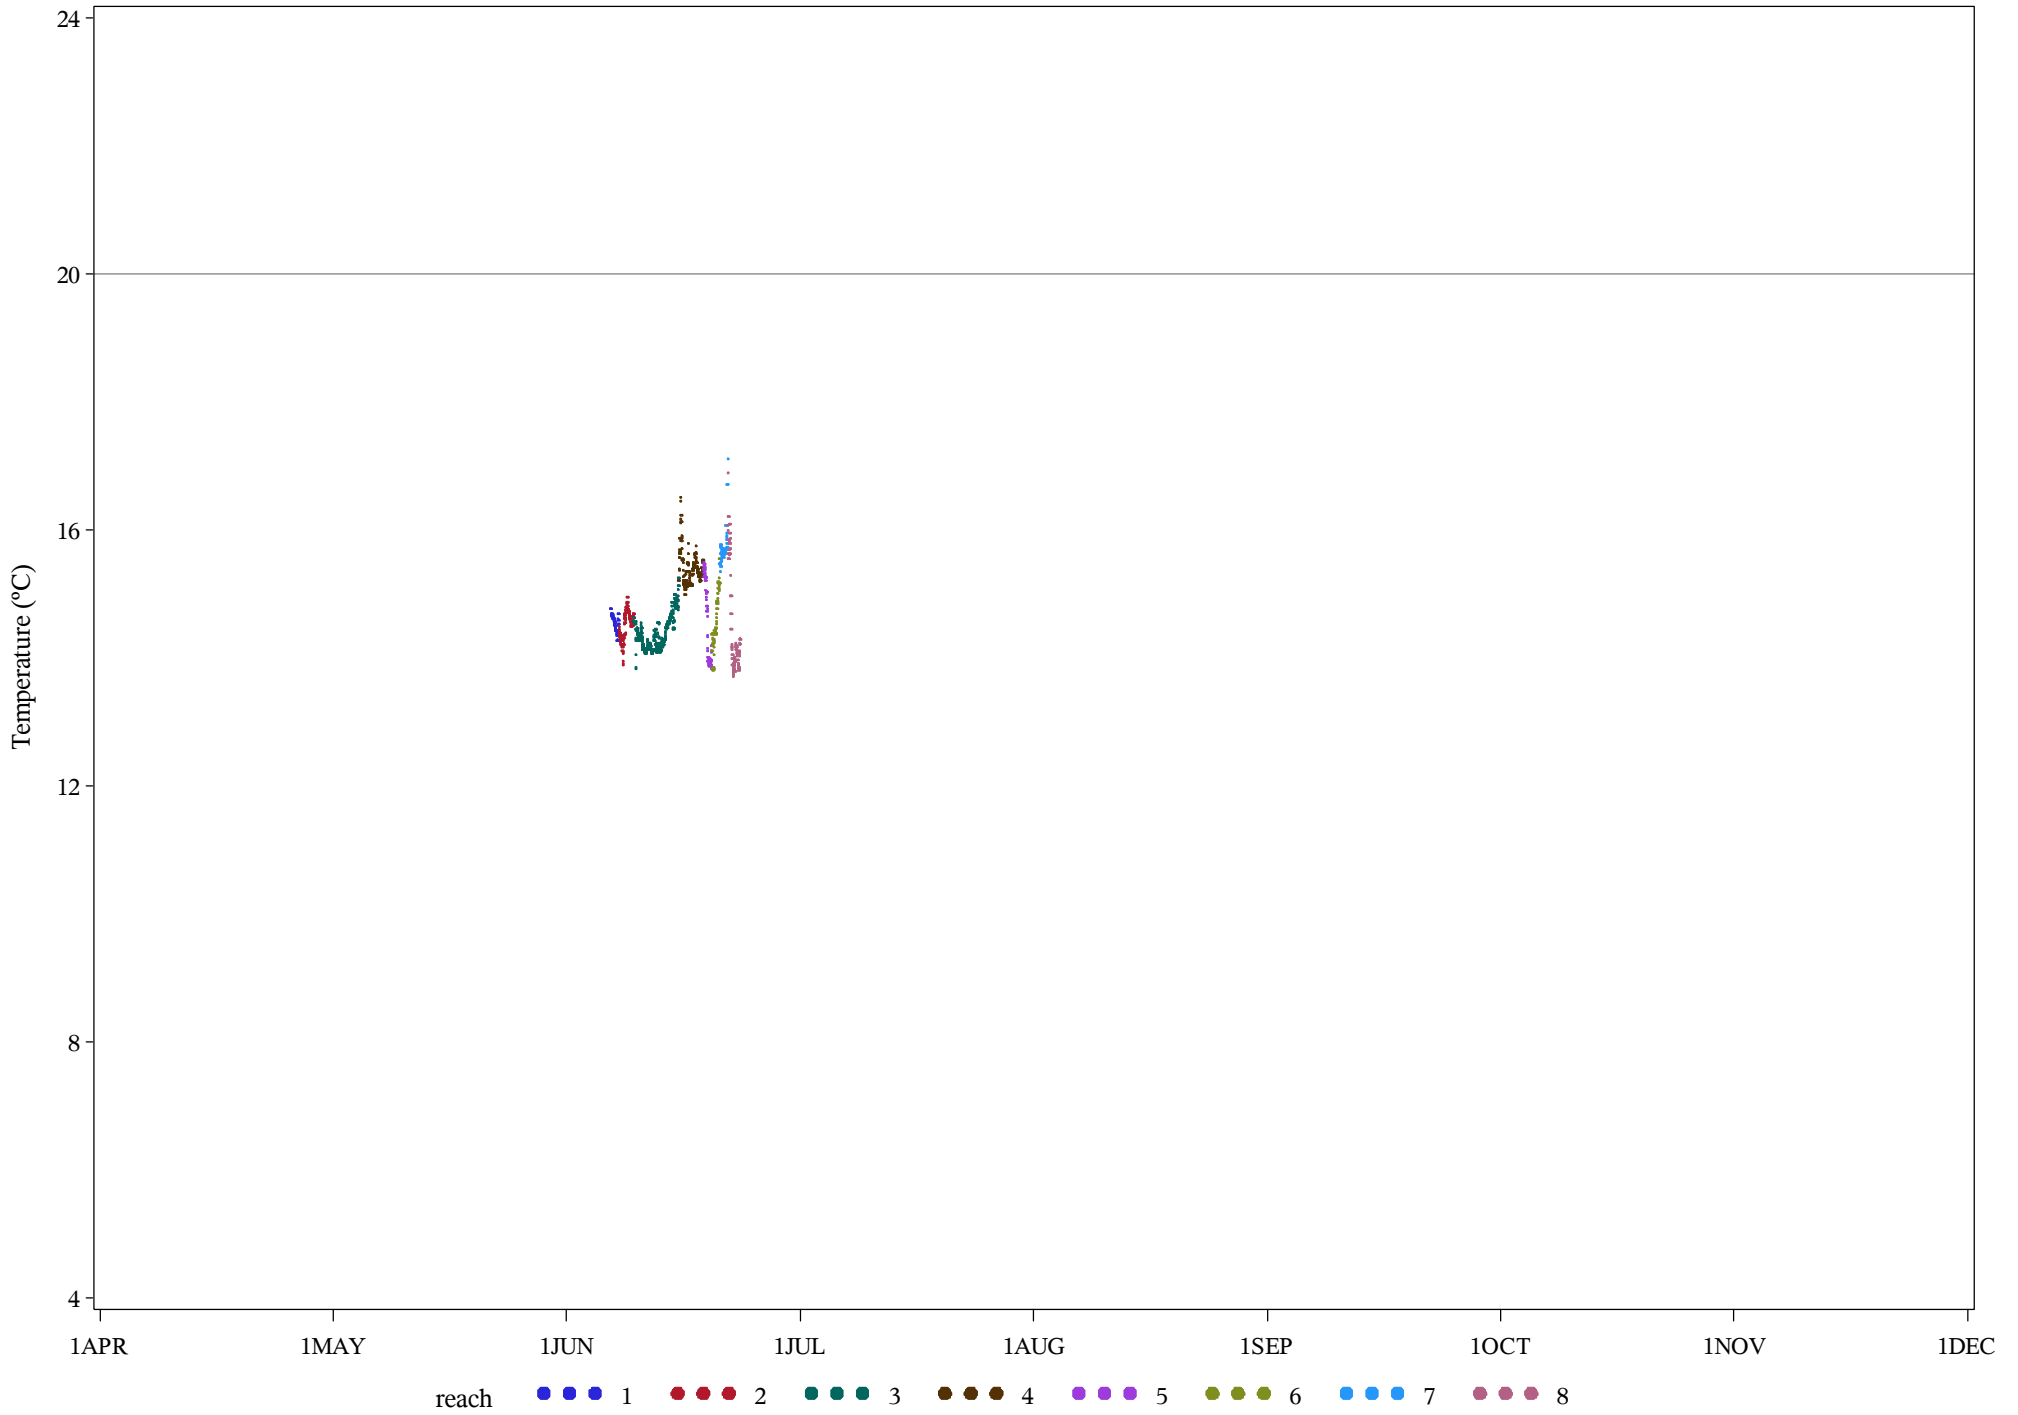

Supplement: pone.0204274.s002.pdf [file pone.0204274.s002.pdf]
