# Supplementary material for: Thermal exposure of adult Chinook salmon and steelhead: Diverse behavioral strategies in a large and warming river system
Source: PubMed Central journal article supplement (PMC6150539; doi:10.1371/journal.pone.0204274), 2018-09-21
Supplement: pone.0204274.s003.pdf [file pone.0204274.s003.pdf]

### S3 Appendix

Tables summarizing the final detection locations and juvenile PIT-tag locations of all Snake River study fish.

Table S1. Final detection sites for RDST-tagged spring Chinook salmon, their fin clip status, and whether they were or were not of known origin based on juvenile PIT tags.

| Year              | Final detection site        | Total      | Fin-clipped |           | Known origin |           |
|-------------------|-----------------------------|------------|-------------|-----------|--------------|-----------|
|                   |                             | <i>n</i>   | Yes         | No        | Yes          | No        |
| 2000              | Clearwater River            | 5          | 5           | -         | 2            | 3         |
|                   | North Fork Clearwater River | 4          | 4           | -         | -            | 4         |
|                   | Dworshak NFH                | 4          | 4           | -         | 1            | 3         |
|                   | Kooskia NFH                 | 1          | 1           | -         | -            | 1         |
|                   | South Fork Clearwater River | 3          | 2           | 1         | 2            | 1         |
|                   | Lochsa River                | 7          | 7           | -         | 1            | 6         |
|                   | Grande Ronde River          | 1          | -           | 1         | 1            | -         |
|                   | Salmon River                |            |             |           |              |           |
|                   | Rapid River                 | 8          | 8           | -         | 1            | 7         |
|                   | South Fork Salmon River     | 18         | 17          | 1         | 1            | 17        |
|                   | Middle Fork Salmon River    | 2          | -           | 2         | 2            | -         |
|                   | Pahsimeroi FH               | 1          | 1           | -         | -            | 1         |
|                   | Sawtooth FH                 | 1          | -           | 1         | 1            | -         |
|                   | Innaha River                | 4          | 2           | 2         | 2            | 2         |
|                   | Hells Canyon Dam            | 4          | 4           | -         | 3            | 1         |
| 2002              | Clearwater River            | 4          | 3           | 1         | 3            | 1         |
|                   | North Fork Clearwater River | 2          | 2           | -         | -            | 2         |
|                   | Dworshak NFH                |            |             |           |              |           |
|                   | Clear Creek                 | 1          | 1           | -         | -            | 1         |
|                   | Kooskia NFH                 | 3          | 3           | -         | 2            | 1         |
|                   | South Fork Clearwater River | 1          | -           | 1         | 1            | -         |
|                   | Lolo Creek                  | 2          | -           | 2         | 2            | 1         |
|                   | Lochsa River                | 3          | -           | 3         | 3            | -         |
|                   | Grande Ronde River          | 6          | 1           | 5         | 5            | 1         |
|                   | Lookingglass H              | 3          | 2           | 1         | 3            | 1         |
|                   | Lostine River               | 1          | 1           | -         | 1            | 1         |
|                   | Wallowa River               | 1          | -           | 1         | 1            | -         |
|                   | Salmon River                | 5          | 2           | 3         | 4            | 1         |
|                   | Rapid River                 | 6          | 6           | -         | 2            | 4         |
|                   | South Fork Salmon River     | 14         | 8           | 6         | 6            | 8         |
|                   | Middle Fork Salmon River    | 8          | -           | 8         | 8            | 1         |
|                   | Lemhi River                 | 1          | -           | 1         | 1            | -         |
|                   | Pahsimeroi FH               |            |             |           |              |           |
|                   | Sawtooth FH                 | 2          | -           | 2         | 2            | 1         |
|                   | Innaha River                | 1          | -           | 1         | 1            | -         |
| Hells Canyon Dam  |                             |            |             |           |              |           |
| Lower Granite Dam | 6                           | 2          | 4           | 4         | 2            |           |
| Hydrosystem       | 11                          | 2          | 9           | 11        | -            |           |
| <b>Total</b>      | <b>All sites</b>            | <b>144</b> | <b>88</b>   | <b>56</b> | <b>77</b>    | <b>67</b> |

Table S2. Final detection sites for RDST-tagged summer Chinook salmon, their fin clip status, and whether they were or were not of known origin based on juvenile PIT tags.

| Year         | Final detection site    | Total<br><i>n</i> | Fin-clipped |           | Known origin |           |
|--------------|-------------------------|-------------------|-------------|-----------|--------------|-----------|
|              |                         |                   | Yes         | No        | Yes          | No        |
| 2000         | Clearwater River        | 1                 | 1           | -         | -            | 1         |
|              | Grande Ronde River      | 1                 | 1           | -         | -            | 1         |
|              | Salmon River            |                   |             |           |              |           |
|              | South Fork Salmon River | 6                 | 6           | -         | -            | 6         |
|              | Pahsimeroi FH           | 2                 | 2           | -         | -            | 2         |
|              | Imnaha River            | 2                 | 2           | -         | -            | 2         |
|              | Lower Granite Dam       | 1                 | 1           | -         | 1            | -         |
| 2002         | Grande Ronde River      | 2                 | 1           | 1         | 2            | -         |
|              | Lostine River           | 4                 | 3           | 1         | 4            | -         |
|              | Imnaha River            | 1                 | -           | 1         | 1            | -         |
|              | Salmon River            |                   |             |           |              |           |
|              | South Fork Salmon River | 7                 | 4           | 3         | 5            | 2         |
|              | Pahsimeroi FH           | 1                 | -           | 1         | 1            | -         |
|              | Lower Granite Dam       | 9                 | 3           | 6         | 7            | 2         |
|              | Hydrosystem             | 3                 | 1           | 2         | 3            | -         |
| <b>Total</b> | <b>All sites</b>        | <b>40</b>         | <b>25</b>   | <b>15</b> | <b>24</b>    | <b>16</b> |

Table S3. Final detection sites for RDST-tagged fall Chinook salmon, their fin clip status, and whether they were or were not of known origin based on juvenile PIT tags.

| Year         | Final detection site             | Total<br><i>n</i> | Fin-clipped |           | Known origin |           |
|--------------|----------------------------------|-------------------|-------------|-----------|--------------|-----------|
|              |                                  |                   | Yes         | No        | Yes          | No        |
| 2000         | Clearwater River                 | 3                 | 3           | -         | 1            | 2         |
|              | Snake River above L. Granite Dam | 3                 | 3           | -         | -            | 3         |
|              | Lower Granite Dam                | 2                 | 2           | -         | -            | 2         |
| 2002         | Clearwater River                 | 9                 | -           | 9         | 8            | 1         |
|              | Snake River above L. Granite Dam | 3                 | -           | 3         | 2            | 1         |
|              | Lower Granite Dam                | 1                 | 1           | -         | -            | 1         |
|              | Hydrosystem                      | 7                 | -           | 7         | 7            | -         |
| <b>Total</b> | <b>All sites</b>                 | <b>28</b>         | <b>9</b>    | <b>19</b> | <b>18</b>    | <b>10</b> |

Table S4. Final detection sites for RDST-tagged steelhead, their fin clip status, and whether they were or were not of known origin based on juvenile PIT tags.

| Year         | Final detection site             | Total<br><i>n</i> | Fin-clipped |            | Known origin |           |
|--------------|----------------------------------|-------------------|-------------|------------|--------------|-----------|
|              |                                  |                   | Yes         | No         | Yes          | No        |
| 2000         | Clearwater River                 | 10                | 9           | 1          | 1            | 9         |
|              | North Fork Clearwater River      | 1                 | 1           | -          | -            | 1         |
|              | Dworshak NFH                     | 5                 | 5           | -          | -            | 5         |
|              | Kooskia NFH                      | 1                 | 1           | -          | -            | 1         |
|              | South Fork Clearwater River      | 2                 | 2           | -          | -            | 2         |
|              | Grande Ronde River               | 1                 | 1           | -          | -            | 1         |
|              | Salmon River                     | 11                | 11          | -          | 1            | 10        |
|              | Little Salmon River              | 2                 | 2           | -          | -            | 2         |
|              | Pahsimeroi FH                    | 2                 | 2           | -          | -            | 2         |
|              | Snake River above L. Granite Dam | 3                 | 3           | -          | -            | 3         |
|              | Lower Granite reservoir          | 2                 | 2           | -          | -            | 2         |
|              | Hells Canyon Dam                 | 1                 | 1           | -          | -            | 1         |
|              | Oxbow FH                         | 1                 | 1           | -          | -            | 1         |
|              | Lower Granite Dam                | 4                 | 4           | -          | -            | 4         |
| 2002         | Clearwater River                 | 5                 | -           | 5          | 5            | -         |
|              | South Fork Clearwater River      | 4                 | -           | 4          | 4            | -         |
|              | Lochsa River                     | 9                 | -           | 9          | 9            | -         |
|              | Grande Ronde River               | 4                 | 2           | 2          | 4            | -         |
|              | Catherine Creek                  | 1                 | -           | 1          | 1            | -         |
|              | Imnaha River                     | 2                 | -           | 2          | 2            | -         |
|              | Salmon River                     | 25                | 2           | 23         | 25           | -         |
|              | Little Salmon River              | 1                 | 1           | -          | -            | 1         |
|              | South Fork Salmon River          | 3                 | -           | 3          | 3            | -         |
|              | Snake River above L. Granite Dam | 13                | 1           | 12         | 13           | -         |
|              | Lower Granite reservoir          | 1                 | -           | 1          | 1            | -         |
|              | Lower Granite Dam                | 61                | 9           | 52         | 59           | 2         |
|              | Hydrosystem                      | 25                | 6           | 19         | 25           | -         |
| <b>Total</b> | <b>All sites</b>                 | <b>200</b>        | <b>66</b>   | <b>134</b> | <b>153</b>   | <b>47</b> |

Table S5. Locations where RDST-tagged Chinook salmon and steelhead were PIT-tagged as juveniles, including tagging codes and site descriptions as archived in PTAGIS.

| Juvenile PIT tag site                        | Spring<br>Chinook | Summer<br>Chinook | Fall<br>Chinook | Steelhead |
|----------------------------------------------|-------------------|-------------------|-----------------|-----------|
| <b>No juvenile PIT tag</b>                   | 67                | 18                | 10              | 47        |
| <b>Lower Granite Dam</b>                     |                   |                   |                 |           |
| LGRRBR: Barge transportation                 | 12                | 1                 |                 | 5         |
| LGRRRR: Return to river                      | 29                | 9                 | 1               | 109       |
| <b>Snake River</b>                           |                   |                   |                 |           |
| SNAKER: Snake River                          |                   |                   | 6               |           |
| SNKTRP: Snake Trap                           | 2                 | 1                 |                 | 2         |
| <b>Clearwater River</b>                      |                   |                   |                 |           |
| BARGAC: Bargamin Creek                       |                   |                   |                 | 2         |
| BCCAP: Big Canyon Creek Acclimation Facility |                   |                   | 1               |           |
| CLEARC: Clear Creek                          | 2                 |                   |                 | 2         |
| CLWR: Clearwater River                       |                   |                   | 10              |           |
| CLWRSF: South Fork Clearwater River          |                   |                   |                 | 1         |
| DWORMS: Dworshak NFH                         |                   |                   |                 | 2         |
| FISTRP: Fish Creek Trap                      |                   |                   |                 | 9         |
| KOOS: Kooskia NFH                            | 1                 |                   |                 |           |
| LOLOC: Lolo Creek                            | 1                 |                   |                 |           |
| MEADOC: Meadow Creek                         | 2                 |                   |                 |           |
| NEWSOC: Newsome Creek                        |                   |                   |                 | 1         |
| POWP: Powell Rearing Pond                    | 1                 |                   |                 |           |
| REDR: Red River                              |                   |                   |                 | 1         |
| REDTRP: Red River Trap                       | 2                 |                   |                 | 1         |
| <b>Grande Ronde River</b>                    |                   |                   |                 |           |
| CATHEC: Catherine Creek                      |                   |                   |                 | 1         |
| COTP: Cottonwood Acclimation Pond            |                   |                   |                 | 1         |
| GRAND2: Grande Ronde River                   | 1                 |                   |                 |           |
| GRANDP: Grande Ronde River Pond              | 1                 |                   |                 |           |
| GRANDR: Grande Ronde River                   | 4                 |                   |                 | 6         |
| LOOKGC: Looking Glass Creek                  | 2                 |                   |                 |           |
| LOSTIP: Lostine River Pond                   | 1                 | 4                 |                 |           |
| LOSTIR: Lostine River                        |                   | 1                 |                 | 1         |
| MINAMR: Minam River                          | 1                 |                   |                 |           |
| <b>Imnaha River</b>                          |                   |                   |                 |           |
| IMNAHW: Imnaha River Weir                    | 1                 |                   |                 |           |
| IMNTRP: Imnaha River Trap                    | 2                 |                   |                 | 2         |
| LSHEEF: Little Sheep Facility                |                   |                   |                 | 1         |
| <b>Salmon River</b>                          |                   |                   |                 |           |
| CHAMBC: Chamberlain Creek                    |                   |                   |                 | 2         |
| ELKC: Elk Creek                              |                   | 1                 |                 |           |
| HERDC: Herd Creek                            |                   |                   |                 | 1         |
| HORSEC: Horse Creek                          |                   |                   |                 | 1         |
| KNOXB: Knox Bridge, South Fork Salmon River  |                   | 1                 |                 |           |
| LAKEC: Lake Creek                            |                   |                   |                 | 1         |
| LEMHIW: Lemhi River Weir                     | 1                 |                   |                 |           |
| MARTRP: March Creek Trap                     | 4                 |                   |                 |           |
| PAHTRP: Pahsimeroi Trap                      |                   | 2                 |                 |           |
| SALTRP: Salmon River Trap                    | 4                 | 2                 |                 |           |
| SAWT: Sawtooth Hatchery                      |                   |                   |                 | 1         |
| SAWTRP: Sawtooth Trap                        | 2                 |                   |                 |           |
| YANKWF: West Fork Yankee Fork Salmon River   | 1                 |                   |                 |           |
